# Supplementary material for: Short Co-occurring Polypeptide Regions Can Predict Global Protein Interaction Maps
Source: PubMed Central journal article supplement — Sci Rep. 2012 Jan 30;2:239. doi: 10.1038/srep00239 (PMC3269044; doi:10.1038/srep00239), 2012-01-30
Supplement: srep00239-s1.pdf [file srep00239-s1.pdf]

# **Short Co-occurring Polypeptide Regions Can Predict Global Protein Interaction Maps**

**Sylvain Pitre<sup>1</sup>, Mohsen Hooshyar<sup>2</sup>, Andrew Schoenrock<sup>1</sup>, Bahram Samanfar<sup>2</sup>, Matthew Jessulat<sup>2</sup>, James R. Green<sup>3</sup>, Frank Dehne<sup>1</sup>, Ashkan Golshani<sup>2\*</sup>**

Address: <sup>1</sup>School of Computer Science, <sup>2</sup>Department of Biology, <sup>3</sup>Department of Systems and Computer Engineering. Carleton University, Ottawa, Canada.

Table S1. Ordered list of PPI predictions.

| Protein A    | Protein B     | Score     | Status | Same component | Same function | Same process | Third Party Interaction |
|--------------|---------------|-----------|--------|----------------|---------------|--------------|-------------------------|
| SPCC23B6.03c | SPBC216.05    | 0.9999994 | Known  | NO             | YES           | NO           | YES                     |
| SPAC3G9.12   | SPAC1093.06c  | 0.9999993 | Known  | YES            | NO            | NO           | YES                     |
| SPBC216.07c  | SPBC30D10.10c | 0.9999993 | Known  | YES            | YES           | YES          | YES                     |
| SPBC216.05   | SPBC25H2.13c  | 0.9999992 | Known  | NO             | NO            | NO           | YES                     |
| SPBC216.02   | SPAC1093.06c  | 0.999999  | Known  | YES            | NO            | YES          | NO                      |
| SPAC4A8.05c  | SPCC645.05c   | 0.9999987 | Known  | YES            | YES           | YES          | YES                     |
| SPAC4F10.13c | SPAC19D5.04   | 0.9999987 | Known  | NO             | NO            | YES          | NO                      |
| SPBP16F5.03c | SPAC458.03    | 0.9999987 | Known  | YES            | YES           | YES          | NO                      |
| SPAC2G11.12  | SPBC216.05    | 0.9999987 | Known  | NO             | YES           | YES          | YES                     |
| SPBC19G7.05c | SPCC5E4.04    | 0.9999987 | Known  | NO             | NO            | NO           | NO                      |
| SPAC458.03   | SPAC1F5.11c   | 0.9999987 | Known  | NO             | YES           | NO           | NO                      |
| SPAC630.13c  | SPBC30D10.10c | 0.9999987 | Known  | YES            | NO            | YES          | YES                     |
| SPAC57A7.11  | SPBC216.07c   | 0.9999987 | Known  | YES            | YES           | YES          | YES                     |
| SPBC12C2.02c | SPBC30D10.10c | 0.9999987 | Known  | YES            | NO            | YES          | NO                      |
| SPCC5E4.04   | SPAC31A2.05c  | 0.9999986 | Known  | NO             | YES           | NO           | NO                      |
| SPCC23B6.03c | SPAC694.06c   | 0.9999986 | Known  | NO             | YES           | NO           | YES                     |
| SPAC27D7.13c | SPAC1093.06c  | 0.9999985 | Known  | YES            | NO            | YES          | YES                     |
| SPBC106.09   | SPCC5E4.04    | 0.9999985 | Known  | NO             | NO            | NO           | YES                     |
| SPBC3E7.08c  | SPBC216.05    | 0.9999985 | Known  | NO             | NO            | NO           | YES                     |
| SPBC336.04   | SPBC216.05    | 0.9999984 | Known  | NO             | YES           | NO           | YES                     |
| SPCC622.13c  | SPBC30D10.10c | 0.9999984 | Known  | NO             | NO            | NO           | YES                     |
| SPBC216.07c  | SPCC622.13c   | 0.9999984 | Known  | NO             | YES           | NO           | YES                     |
| SPAC694.06c  | SPBC216.05    | 0.9999983 | Known  | YES            | YES           | YES          | YES                     |
| SPCC23B6.03c | SPAC458.03    | 0.9999983 | Known  | NO             | YES           | NO           | YES                     |
| SPBC12C2.02c | SPCC5E4.04    | 0.9999983 | Known  | YES            | NO            | NO           | NO                      |
| SPBC336.04   | SPBC25H2.13c  | 0.9999983 | Known  | YES            | YES           | NO           | YES                     |
| SPCC1620.14c | SPAC3G6.01    | 0.9999982 | Known  | YES            | YES           | NO           | NO                      |
| SPBC29A10.04 | SPCC5E4.04    | 0.9999982 | Known  | NO             | YES           | NO           | YES                     |
| SPAC4A8.05c  | SPCC1739.11c  | 0.9999981 | Known  | NO             | YES           | YES          | YES                     |
| SPAC3F10.11c | SPAC30.04c    | 0.9999981 | Known  | YES            | YES           | YES          | NO                      |
| SPBC6B1.07   | SPAC4F8.12c   | 0.9999981 | Known  | YES            | NO            | NO           | YES                     |
| SPAC23G3.01  | SPBC28F2.12   | 0.9999981 | Known  | YES            | YES           | YES          | YES                     |
| SPAC22F3.13  | SPBC30D10.10c | 0.999998  | Known  | YES            | NO            | YES          | YES                     |
| SPAC458.03   | SPBC216.05    | 0.999998  | Known  | NO             | YES           | NO           | YES                     |
| SPCC23B6.03c | SPAC1687.05   | 0.999998  | Known  | NO             | NO            | NO           | YES                     |
| SPAC15A10.16 | SPCC895.05    | 0.999998  | Known  | YES            | YES           | YES          | YES                     |
| SPAC458.03   | SPBC30D10.10c | 0.999998  | Known  | YES            | NO            | YES          | YES                     |
| SPBC216.07c  | SPAC458.03    | 0.999998  | Known  | YES            | YES           | YES          | YES                     |
| SPAC9G1.02   | SPAC1006.09   | 0.999998  | Known  | NO             | YES           | YES          | YES                     |
| SPBC6B1.07   | SPAC9.03c     | 0.9999979 | Known  | YES            | NO            | NO           | YES                     |
| SPAC4A8.05c  | SPBC1709.01   | 0.9999979 | Known  | NO             | YES           | YES          | YES                     |
| SPAPB1E7.02c | SPBC216.05    | 0.9999979 | Known  | YES            | YES           | NO           | YES                     |
| SPCC18B5.03  | SPBP19A11.04c | 0.9999979 | Known  | NO             | YES           | NO           | YES                     |
| SPBC25H2.13c | SPBC16A3.11   | 0.9999979 | Known  | NO             | YES           | NO           | NO                      |

|               |               |           |       |     |     |     |     |
|---------------|---------------|-----------|-------|-----|-----|-----|-----|
| SPAC1783.05   | SPAC3G6.01    | 0.9999978 | Known | YES | YES | YES | NO  |
| SPAC110.02    | SPAC31A2.05c  | 0.9999978 | Known | YES | YES | YES | YES |
| SPAC3C7.12    | SPAC1093.06c  | 0.9999978 | Known | YES | NO  | YES | YES |
| SPBC19C7.03   | SPBC21C3.20c  | 0.9999978 | Known | NO  | NO  | YES | YES |
| SPBP4H10.06c  | SPAC31A2.05c  | 0.9999978 | Known | NO  | NO  | NO  | NO  |
| SPCC23B6.03c  | SPAC16A10.07c | 0.9999978 | Known | NO  | YES | YES | YES |
| SPBC342.05    | SPBC216.05    | 0.9999978 | Known | NO  | YES | NO  | YES |
| SPBC19G7.05c  | SPBC21.06c    | 0.9999978 | Known | NO  | NO  | NO  | YES |
| SPBC19G7.05c  | SPCC1322.12c  | 0.9999977 | Known | NO  | NO  | NO  | YES |
| SPBC25D12.03c | SPBC216.05    | 0.9999977 | Known | NO  | YES | NO  | YES |
| SPBC19G7.05c  | SPCC1739.11c  | 0.9999977 | Known | YES | NO  | NO  | YES |
| SPAC4F8.12c   | SPAC644.12    | 0.9999977 | Known | YES | NO  | NO  | YES |
| SPAC17H9.20   | SPCC5E4.04    | 0.9999977 | Known | NO  | NO  | NO  | NO  |
| SPAC23E2.02   | SPAC1783.05   | 0.9999976 | Known | YES | YES | YES | NO  |
| SPBP19A11.06  | SPAC3H1.12c   | 0.9999976 | Known | YES | YES | YES | YES |
| SPCC23B6.03c  | SPAC9E9.08    | 0.9999976 | Known | NO  | NO  | YES | YES |
| SPCC23B6.03c  | SPBC6B1.09c   | 0.9999976 | Known | YES | YES | YES | NO  |
| SPBC342.05    | SPBC25H2.13c  | 0.9999976 | Known | NO  | NO  | YES | YES |
| SPAC20G8.05c  | SPAC1F5.04c   | 0.9999976 | Known | YES | YES | YES | NO  |
| SPBC1A4.03c   | SPCC5E4.06    | 0.9999976 | Known | NO  | YES | NO  | YES |
| SPCC23B6.03c  | SPAC14C4.13   | 0.9999976 | Known | NO  | YES | YES | YES |
| SPCC23B6.03c  | SPCC126.02c   | 0.9999976 | Known | YES | YES | YES | YES |
| SPCC1223.06   | SPCC895.05    | 0.9999975 | Known | YES | YES | YES | YES |
| SPBC216.05    | SPBC29A10.15  | 0.9999975 | Known | NO  | YES | NO  | YES |
| SPBC336.12c   | SPBP19A11.04c | 0.9999975 | Known | YES | YES | NO  | YES |
| SPBP4H10.06c  | SPAC3H5.06c   | 0.9999975 | Known | NO  | NO  | NO  | NO  |
| SPAC9.03c     | SPAC644.12    | 0.9999975 | Known | YES | NO  | NO  | YES |
| SPBC211.04c   | SPCC5E4.04    | 0.9999975 | Known | NO  | NO  | NO  | YES |
| SPCC645.05c   | SPBC21.06c    | 0.9999975 | Known | NO  | YES | NO  | YES |
| SPBC19G7.05c  | SPAC20G8.05c  | 0.9999974 | Known | YES | NO  | NO  | YES |
| SPCC645.05c   | SPCC1739.11c  | 0.9999974 | Known | NO  | YES | NO  | YES |
| SPCC1223.06   | SPAC15A10.16  | 0.9999974 | Known | NO  | YES | YES | YES |
| SPAC16A10.07c | SPBC216.05    | 0.9999974 | Known | NO  | YES | YES | YES |
| SPBP4H10.06c  | SPBC146.03c   | 0.9999973 | Known | YES | YES | YES | YES |
| SPAPYUG7.02c  | SPBC30D10.10c | 0.9999973 | Known | YES | NO  | YES | NO  |
| SPAC13C5.07   | SPBC216.05    | 0.9999973 | Known | NO  | YES | YES | YES |
| SPBC216.05    | SPAC23C4.18c  | 0.9999973 | Known | NO  | YES | NO  | YES |
| SPBC776.13    | SPBC146.03c   | 0.9999973 | Known | YES | NO  | YES | YES |
| SPBC3F6.05    | SPCC645.07    | 0.9999973 | Known | YES | NO  | YES | YES |
| SPBC31F10.14c | SPBC31F10.13c | 0.9999973 | Known | NO  | YES | YES | YES |
| SPBC336.04    | SPBC16D10.04c | 0.9999973 | Known | YES | YES | YES | YES |
| SPAC17D4.02   | SPBC216.05    | 0.9999973 | Known | NO  | YES | NO  | YES |
| SPBC19G7.05c  | SPCC18B5.03   | 0.9999973 | Known | NO  | NO  | NO  | YES |
| SPAC1565.08   | SPCC5E4.04    | 0.9999972 | Known | YES | YES | NO  | YES |
| SPBC29A10.04  | SPAC10F6.09c  | 0.9999972 | Known | YES | YES | YES | YES |
| SPBC16G5.12c  | SPBC216.05    | 0.9999972 | Known | NO  | YES | NO  | YES |
| SPBC3E7.08c   | SPAC2G11.12   | 0.9999972 | Known | NO  | YES | NO  | YES |

|               |               |           |       |     |     |     |     |
|---------------|---------------|-----------|-------|-----|-----|-----|-----|
| SPCC5E4.04    | SPCC895.07    | 0.9999972 | Known | NO  | YES | NO  | YES |
| SPBC216.05    | SPAC9E9.08    | 0.9999972 | Known | NO  | NO  | YES | YES |
| SPCC126.02c   | SPBC216.05    | 0.9999971 | Known | NO  | YES | NO  | YES |
| SPBC216.05    | SPAC14C4.13   | 0.9999971 | Known | NO  | YES | YES | YES |
| SPAC27F1.09c  | SPAPJ698.03c  | 0.9999971 | Known | YES | NO  | YES | YES |
| SPBC17F3.02   | SPBP19A11.04c | 0.9999971 | Known | YES | YES | YES | YES |
| SPBC342.05    | SPCC5E4.04    | 0.9999971 | Known | NO  | YES | NO  | YES |
| SPBC216.05    | SPBC19C7.09c  | 0.9999971 | Known | NO  | NO  | NO  | YES |
| SPCC645.05c   | SPBC1709.01   | 0.9999971 | Known | NO  | YES | YES | YES |
| SPBC216.05    | SPBC1347.10   | 0.9999971 | Known | NO  | YES | NO  | YES |
| SPAC17A5.11   | SPAC1093.06c  | 0.9999971 | Known | NO  | YES | YES | NO  |
| SPBC1709.01   | SPCC1919.10c  | 0.9999971 | Known | YES | NO  | YES | NO  |
| SPCC645.05c   | SPCC4B3.15    | 0.9999971 | Known | NO  | YES | NO  | YES |
| SPAC3G9.14    | SPCC5E4.04    | 0.999997  | Known | YES | NO  | NO  | YES |
| SPAC29B12.02c | SPBC28F2.12   | 0.999997  | Known | YES | NO  | NO  | YES |
| SPAC589.02c   | SPAC688.08    | 0.999997  | Known | YES | NO  | YES | YES |
| SPAC31A2.05c  | SPBC16A3.11   | 0.999997  | Known | NO  | YES | YES | YES |
| SPBC216.05    | SPAC821.04c   | 0.999997  | Known | NO  | YES | NO  | YES |
| SPBC28E12.03  | SPCC895.05    | 0.999997  | Known | YES | YES | YES | NO  |
| SPBC216.05    | SPCC338.16    | 0.999997  | Known | NO  | YES | NO  | YES |
| SPBP4H10.06c  | SPBC776.13    | 0.999997  | Known | YES | NO  | YES | YES |
| SPBC336.07    | SPCC16C4.14c  | 0.9999969 | Known | YES | YES | YES | YES |
| SPAC9E9.08    | SPBC25H2.13c  | 0.9999969 | Known | NO  | NO  | NO  | YES |
| SPAC6F6.06c   | SPCC1223.06   | 0.9999969 | Known | YES | NO  | YES | NO  |
| SPBC25H2.13c  | SPAC14C4.13   | 0.9999969 | Known | NO  | NO  | NO  | YES |
| SPCC24B10.07  | SPBC30D10.10c | 0.9999969 | Known | NO  | YES | YES | NO  |
| SPAC144.13c   | SPBC216.05    | 0.9999969 | Known | YES | NO  | NO  | YES |
| SPBC31F10.14c | SPBC15D4.03   | 0.9999969 | Known | NO  | YES | YES | YES |
| SPAC19G12.01c | SPCC5E4.04    | 0.9999968 | Known | NO  | YES | NO  | YES |
| SPBC582.05c   | SPBC1A4.03c   | 0.9999968 | Known | NO  | NO  | NO  | YES |
| SPAC24H6.05   | SPBP19A11.04c | 0.9999968 | Known | YES | YES | NO  | YES |
| SPAC13G6.01c  | SPCC5E4.06    | 0.9999968 | Known | NO  | YES | YES | NO  |
| SPBC216.07c   | SPAC144.13c   | 0.9999968 | Known | NO  | NO  | YES | YES |
| SPCC1223.06   | SPAC6G10.02c  | 0.9999968 | Known | YES | NO  | YES | YES |
| SPBC216.06c   | SPAC2G11.12   | 0.9999968 | Known | NO  | YES | YES | YES |
| SPBC19G7.05c  | SPAC19G12.14  | 0.9999968 | Known | NO  | NO  | NO  | NO  |
| SPAC23E2.02   | SPBC146.09c   | 0.9999968 | Known | YES | YES | YES | NO  |
| SPBC685.09    | SPBC216.05    | 0.9999967 | Known | NO  | NO  | NO  | YES |
| SPAC19B12.05c | SPBC28F2.12   | 0.9999967 | Known | NO  | YES | NO  | YES |
| SPCC18B5.03   | SPAC1006.09   | 0.9999967 | Known | NO  | YES | NO  | YES |
| SPBC3E7.08c   | SPAC13G6.01c  | 0.9999967 | Known | NO  | YES | YES | YES |
| SPCC285.16c   | SPAC8F11.03   | 0.9999967 | Known | NO  | YES | YES | YES |
| SPAPB1A10.09  | SPBC19G7.05c  | 0.9999967 | Known | NO  | NO  | NO  | NO  |
| SPCC74.06     | SPAC8C9.14    | 0.9999967 | Known | NO  | YES | YES | YES |
| SPCC188.08c   | SPBC713.02c   | 0.9999967 | Known | NO  | YES | YES | NO  |
| SPAC2F7.03c   | SPCC1223.06   | 0.9999967 | Known | YES | YES | YES | YES |
| SPAC8C9.14    | SPAC27E2.09   | 0.9999966 | Known | NO  | YES | YES | YES |

|               |              |           |       |     |     |     |     |
|---------------|--------------|-----------|-------|-----|-----|-----|-----|
| SPBC216.05    | SPAC11E3.08c | 0.9999966 | Known | NO  | YES | NO  | YES |
| SPBC19G7.01c  | SPCC285.16c  | 0.9999966 | Known | NO  | YES | YES | YES |
| SPAC6F12.15c  | SPCC5E4.04   | 0.9999966 | Known | NO  | YES | NO  | YES |
| SPAC2F7.03c   | SPAC6G10.02c | 0.9999966 | Known | YES | NO  | YES | YES |
| SPAC343.11c   | SPAC20G8.01  | 0.9999966 | Known | NO  | YES | NO  | YES |
| SPAC14C4.02c  | SPCC5E4.06   | 0.9999966 | Known | YES | YES | YES | YES |
| SPAC20G8.01   | SPAC31A2.05c | 0.9999966 | Known | NO  | YES | NO  | NO  |
| SPBC19C7.03   | SPAC1751.01c | 0.9999966 | Known | NO  | NO  | NO  | YES |
| SPAC17C9.01c  | SPCC5E4.04   | 0.9999966 | Known | NO  | YES | NO  | YES |
| SPBC1A4.03c   | SPBC1703.14c | 0.9999966 | Known | NO  | YES | YES | NO  |
| SPAC2G11.12   | SPCC16A11.17 | 0.9999966 | Known | NO  | YES | NO  | YES |
| SPAC22F3.13   | SPAC630.13c  | 0.9999966 | Known | YES | YES | YES | YES |
| SPBC216.05    | SPBC776.12c  | 0.9999965 | Known | NO  | YES | NO  | YES |
| SPBC1706.01   | SPCC895.05   | 0.9999965 | Known | YES | YES | YES | YES |
| SPCC23B6.03c  | SPAC664.07c  | 0.9999965 | Known | NO  | YES | YES | YES |
| SPAC4H3.05    | SPAC2G11.12  | 0.9999965 | Known | NO  | YES | YES | YES |
| SPBC19C7.03   | SPAC1B9.02c  | 0.9999965 | Known | NO  | YES | YES | YES |
| SPCC1259.13   | SPBC216.05   | 0.9999965 | Known | NO  | YES | NO  | YES |
| SPAC4A8.05c   | SPBP4H10.04  | 0.9999965 | Known | NO  | NO  | NO  | YES |
| SPBC582.05c   | SPAC2G11.12  | 0.9999964 | Known | NO  | NO  | NO  | YES |
| SPBC336.01    | SPAC2G11.12  | 0.9999964 | Known | NO  | YES | YES | YES |
| SPBC12D12.01  | SPAC56E4.04c | 0.9999964 | Known | NO  | NO  | NO  | NO  |
| SPAC1952.13   | SPAC1486.05  | 0.9999964 | Known | NO  | YES | YES | NO  |
| SPBC1706.01   | SPAC1006.09  | 0.9999964 | Known | NO  | YES | NO  | NO  |
| SPCC188.03    | SPBC146.03c  | 0.9999964 | Known | YES | NO  | YES | YES |
| SPBC216.05    | SPAC17H9.19c | 0.9999964 | Known | NO  | YES | NO  | YES |
| SPBC216.05    | SPAC821.08c  | 0.9999964 | Known | NO  | YES | NO  | YES |
| SPCC777.13    | SPBC16C6.06  | 0.9999964 | Known | NO  | NO  | NO  | NO  |
| SPCC188.13c   | SPCC736.11   | 0.9999964 | Known | NO  | NO  | YES | YES |
| SPAPB1E7.02c  | SPAC3H5.06c  | 0.9999964 | Known | YES | YES | YES | YES |
| SPBP19A11.06  | SPBC83.07    | 0.9999964 | Known | YES | NO  | YES | YES |
| SPBC16D10.04c | SPAPB1E7.02c | 0.9999964 | Known | NO  | YES | YES | YES |
| SPCC645.05c   | SPCC613.04c  | 0.9999964 | Known | YES | YES | YES | YES |
| SPAC2F7.03c   | SPCC1739.11c | 0.9999964 | Known | NO  | YES | YES | YES |
| SPBC1105.04c  | SPBC25H2.13c | 0.9999964 | Known | NO  | NO  | YES | YES |
| SPBC12D12.04c | SPAC1F3.02c  | 0.9999963 | Known | YES | YES | YES | YES |
| SPCC16C4.09   | SPBC21.06c   | 0.9999963 | Known | NO  | NO  | NO  | YES |
| SPBC336.03    | SPCC1223.06  | 0.9999963 | Known | NO  | NO  | YES | YES |
| SPBC16G5.12c  | SPCC5E4.04   | 0.9999963 | Known | NO  | YES | NO  | YES |
| SPCC613.12c   | SPAC1486.05  | 0.9999963 | Known | NO  | YES | NO  | NO  |
| SPBC19C7.03   | SPAC6F12.15c | 0.9999963 | Known | NO  | YES | NO  | YES |
| SPAC15A10.03c | SPAC2G11.12  | 0.9999963 | Known | NO  | YES | YES | YES |
| SPAC17G6.16c  | SPBC1709.08  | 0.9999963 | Known | YES | NO  | YES | YES |
| SPBC146.13c   | SPAC20G8.05c | 0.9999963 | Known | YES | YES | YES | NO  |
| SPBC16D10.04c | SPBC887.14c  | 0.9999963 | Known | NO  | YES | YES | YES |
| SPBC19G7.05c  | SPAC23C4.18c | 0.9999963 | Known | NO  | NO  | NO  | YES |
| SPCC777.14    | SPAC4F8.12c  | 0.9999963 | Known | NO  | NO  | NO  | YES |

|               |               |           |       |     |     |     |     |
|---------------|---------------|-----------|-------|-----|-----|-----|-----|
| SPAC19D5.04   | SPBC16A3.05c  | 0.9999963 | Known | NO  | NO  | NO  | NO  |
| SPBC21.06c    | SPCC1739.11c  | 0.9999963 | Known | YES | YES | YES | YES |
| SPAC1610.03c  | SPAP27G11.10c | 0.9999963 | Known | NO  | NO  | YES | YES |
| SPAC1F3.02c   | SPAC17G8.14c  | 0.9999962 | Known | YES | YES | YES | YES |
| SPBC409.07c   | SPCC5E4.04    | 0.9999962 | Known | YES | YES | NO  | YES |
| SPBC21D10.12  | SPBC216.05    | 0.9999962 | Known | NO  | YES | NO  | NO  |
| SPBC6B1.07    | SPAPJ698.03c  | 0.9999962 | Known | NO  | NO  | YES | YES |
| SPBC342.05    | SPAC3H5.06c   | 0.9999962 | Known | NO  | YES | YES | YES |
| SPBC3E7.08c   | SPBC19G7.01c  | 0.9999962 | Known | NO  | NO  | NO  | YES |
| SPBC25H2.13c  | SPAC8F11.07c  | 0.9999962 | Known | YES | NO  | NO  | YES |
| SPBC19C7.03   | SPAC22E12.14c | 0.9999962 | Known | NO  | YES | YES | YES |
| SPBC216.07c   | SPBC19C2.05   | 0.9999962 | Known | YES | YES | YES | YES |
| SPCC18B5.11c  | SPBC216.05    | 0.9999962 | Known | NO  | YES | YES | YES |
| SPAC2G11.12   | SPBC1703.14c  | 0.9999962 | Known | NO  | YES | YES | YES |
| SPBC17D11.06  | SPBC216.05    | 0.9999962 | Known | NO  | NO  | NO  | YES |
| SPAPB1E7.02c  | SPAC2G11.12   | 0.9999962 | Known | NO  | YES | YES | YES |
| SPCC1259.13   | SPBC25H2.13c  | 0.9999962 | Known | NO  | NO  | NO  | YES |
| SPBC6B1.07    | SPAC27F1.09c  | 0.9999961 | Known | NO  | NO  | YES | YES |
| SPBC16D10.04c | SPAC20G8.01   | 0.9999961 | Known | YES | YES | YES | NO  |
| SPAC926.04c   | SPCC645.05c   | 0.9999961 | Known | NO  | YES | NO  | YES |
| SPAPB1A10.09  | SPAC3G9.12    | 0.9999961 | Known | YES | NO  | YES | NO  |
| SPCC18B5.03   | SPAPJ698.03c  | 0.9999961 | Known | NO  | NO  | NO  | NO  |
| SPAC24H6.03   | SPCC330.11    | 0.9999961 | Known | NO  | NO  | NO  | YES |
| SPBC19G7.01c  | SPAC17H9.10c  | 0.9999961 | Known | NO  | NO  | NO  | YES |
| SPCC16C4.09   | SPAC17G8.14c  | 0.9999961 | Known | YES | NO  | NO  | YES |
| SPBC336.04    | SPBC216.06c   | 0.9999961 | Known | NO  | YES | NO  | YES |
| SPAC110.02    | SPBC16A3.11   | 0.9999961 | Known | NO  | YES | YES | YES |
| SPCC5E4.04    | SPBC14C8.07c  | 0.999996  | Known | NO  | NO  | NO  | YES |
| SPAC19G12.01c | SPBC106.09    | 0.999996  | Known | YES | NO  | YES | YES |
| SPAC24B11.11c | SPBC19G7.05c  | 0.999996  | Known | NO  | NO  | NO  | YES |
| SPAPB1E7.06c  | SPAC3H5.06c   | 0.999996  | Known | NO  | YES | NO  | YES |
| SPBP4H10.06c  | SPCC736.14    | 0.999996  | Known | YES | NO  | NO  | YES |
| SPBC342.05    | SPAC2G11.12   | 0.999996  | Known | NO  | YES | YES | YES |
| SPAC19D5.04   | SPBC26H8.01   | 0.999996  | Known | NO  | NO  | NO  | NO  |
| SPCC5E4.04    | SPBC29B5.01   | 0.999996  | Known | NO  | YES | NO  | YES |
| SPBC1A4.03c   | SPBC1778.02   | 0.999996  | Known | NO  | NO  | NO  | YES |
| SPBP4H10.06c  | SPCC188.03    | 0.999996  | Known | YES | NO  | YES | YES |
| SPAC6F12.14   | SPCC5E4.04    | 0.999996  | Known | NO  | YES | NO  | YES |
| SPCC1223.06   | SPBC4F6.06    | 0.9999959 | Known | YES | NO  | YES | YES |
| SPAC57A7.04c  | SPAP27G11.10c | 0.9999959 | Known | NO  | NO  | YES | YES |
| SPBC19C7.03   | SPBC409.07c   | 0.9999959 | Known | NO  | YES | NO  | YES |
| SPAC821.12    | SPBP19A11.04c | 0.9999959 | Known | NO  | YES | YES | YES |
| SPAC3H5.06c   | SPAC1687.05   | 0.9999959 | Known | NO  | NO  | NO  | NO  |
| SPAC6F6.17    | SPAC1687.05   | 0.9999959 | Known | NO  | NO  | NO  | NO  |
| SPBC25D12.03c | SPAC2G11.12   | 0.9999959 | Known | NO  | YES | NO  | YES |
| SPCC645.05c   | SPBC244.01c   | 0.9999959 | Known | NO  | YES | NO  | YES |
| SPBC12D12.04c | SPAC17G8.14c  | 0.9999959 | Known | YES | YES | YES | YES |

|               |               |           |       |     |     |     |     |
|---------------|---------------|-----------|-------|-----|-----|-----|-----|
| SPAC664.07c   | SPBC216.05    | 0.9999959 | Known | NO  | YES | YES | YES |
| SPBC582.05c   | SPCC5E4.06    | 0.9999959 | Known | NO  | NO  | YES | YES |
| SPCC1223.06   | SPAC16E8.09   | 0.9999958 | Known | YES | YES | NO  | YES |
| SPBC3E7.08c   | SPAC22F8.11   | 0.9999958 | Known | NO  | NO  | NO  | YES |
| SPAC2F7.03c   | SPCC4B3.15    | 0.9999958 | Known | NO  | YES | YES | YES |
| SPBC12D12.01  | SPAC1F3.06c   | 0.9999958 | Known | YES | YES | NO  | NO  |
| SPBC29A10.04  | SPCC895.07    | 0.9999958 | Known | NO  | YES | NO  | YES |
| SPBC216.07c   | SPBP18G5.03   | 0.9999958 | Known | YES | NO  | YES | NO  |
| SPCC338.17c   | SPAC31A2.05c  | 0.9999958 | Known | YES | YES | YES | YES |
| SPAC19G12.14  | SPCC645.07    | 0.9999958 | Known | YES | NO  | NO  | NO  |
| SPBP19A11.06  | SPBC13G1.08c  | 0.9999958 | Known | YES | YES | YES | YES |
| SPBC19G7.01c  | SPAC8F11.03   | 0.9999958 | Known | YES | YES | YES | YES |
| SPBC21.06c    | SPAC20G8.05c  | 0.9999958 | Known | NO  | YES | NO  | YES |
| SPAC4H3.05    | SPBC3E7.08c   | 0.9999958 | Known | NO  | YES | NO  | YES |
| SPAC57A7.11   | SPAC27D7.03c  | 0.9999958 | Known | YES | YES | NO  | YES |
| SPBC146.03c   | SPCC306.03c   | 0.9999958 | Known | YES | NO  | YES | YES |
| SPBC1A4.03c   | SPAC16A10.07c | 0.9999958 | Known | NO  | NO  | NO  | YES |
| SPBC3B9.15c   | SPBC19C2.09   | 0.9999958 | Known | YES | NO  | YES | NO  |
| SPBC21.06c    | SPCC4B3.15    | 0.9999957 | Known | NO  | YES | NO  | YES |
| SPAC6F12.15c  | SPBC106.09    | 0.9999957 | Known | YES | NO  | YES | YES |
| SPBC646.02    | SPAC644.12    | 0.9999957 | Known | YES | NO  | YES | NO  |
| SPBC30D10.10c | SPCC777.08c   | 0.9999957 | Known | YES | NO  | YES | NO  |
| SPBC1709.01   | SPCC1739.11c  | 0.9999957 | Known | YES | YES | YES | YES |
| SPBC1778.02   | SPAC6F6.17    | 0.9999957 | Known | YES | YES | YES | YES |
| SPAC17C9.01c  | SPBC106.09    | 0.9999957 | Known | YES | YES | YES | YES |
| SPAC2F7.03c   | SPBC4F6.06    | 0.9999957 | Known | NO  | YES | YES | YES |
| SPAC23G3.01   | SPAC29B12.02c | 0.9999957 | Known | YES | NO  | NO  | YES |
| SPCC16C4.07   | SPBC19G7.05c  | 0.9999957 | Known | NO  | NO  | NO  | YES |
| SPAC2G11.12   | SPAC1687.05   | 0.9999957 | Known | NO  | NO  | NO  | YES |
| SPCC622.13c   | SPAC458.03    | 0.9999956 | Known | YES | YES | YES | YES |
| SPBP4H10.06c  | SPCC895.07    | 0.9999956 | Known | NO  | NO  | NO  | YES |
| SPAC6G9.06c   | SPBC365.15    | 0.9999956 | Known | YES | YES | YES | NO  |
| SPAC6G9.06c   | SPAC4H3.11c   | 0.9999956 | Known | YES | YES | YES | NO  |
| SPAC15A10.08  | SPCC645.05c   | 0.9999956 | Known | YES | YES | YES | YES |
| SPAC1556.01c  | SPAC1687.05   | 0.9999955 | Known | NO  | YES | NO  | YES |
| SPBC1921.03c  | SPAP27G11.10c | 0.9999955 | Known | YES | NO  | NO  | YES |
| SPBC106.10    | SPCC5E4.04    | 0.9999955 | Known | YES | YES | NO  | YES |
| SPBC28F2.12   | SPBP23A10.14c | 0.9999955 | Known | NO  | YES | NO  | NO  |
| SPCC1223.06   | SPBC1706.01   | 0.9999955 | Known | YES | YES | YES | YES |
| SPCC18B5.03   | SPBC19C2.01   | 0.9999955 | Known | NO  | YES | NO  | NO  |
| SPAC16A10.07c | SPAC6F6.17    | 0.9999955 | Known | YES | YES | YES | YES |
| SPBC16D10.04c | SPAC16A10.07c | 0.9999955 | Known | NO  | YES | YES | NO  |
| SPBC19C7.03   | SPAC26F1.10c  | 0.9999955 | Known | NO  | NO  | YES | YES |
| SPAC24B11.11c | SPCC645.05c   | 0.9999955 | Known | NO  | YES | NO  | YES |
| SPAC1783.05   | SPAC1687.20c  | 0.9999955 | Known | YES | YES | NO  | NO  |
| SPBC2F12.13   | SPCC1322.12c  | 0.9999955 | Known | YES | YES | YES | YES |
| SPAC15A10.08  | SPAC4F8.13c   | 0.9999955 | Known | YES | YES | YES | YES |

|               |               |           |       |     |     |     |     |
|---------------|---------------|-----------|-------|-----|-----|-----|-----|
| SPBC428.01c   | SPAC1805.04   | 0.9999955 | Known | YES | YES | YES | NO  |
| SPAPI698.03c  | SPAC644.12    | 0.9999954 | Known | YES | NO  | YES | YES |
| SPAC4F8.13c   | SPBC1778.06c  | 0.9999954 | Known | YES | YES | YES | YES |
| SPCC188.13c   | SPAC16A10.07c | 0.9999954 | Known | NO  | NO  | YES | NO  |
| SPCC417.07c   | SPBC428.20c   | 0.9999954 | Known | YES | YES | YES | YES |
| SPBC216.05    | SPBC1734.06   | 0.9999954 | Known | NO  | NO  | NO  | YES |
| SPAC3A11.14c  | SPAC25G10.07c | 0.9999954 | Known | YES | YES | YES | NO  |
| SPBC336.04    | SPBC4.04c     | 0.9999954 | Known | NO  | YES | NO  | YES |
| SPBC428.01c   | SPBP35G2.06c  | 0.9999954 | Known | YES | YES | YES | NO  |
| SPAC27F1.09c  | SPAC644.12    | 0.9999954 | Known | YES | NO  | YES | YES |
| SPBC23E6.07c  | SPBC902.02c   | 0.9999954 | Known | YES | YES | YES | NO  |
| SPAC17D4.02   | SPAC3H5.06c   | 0.9999953 | Known | YES | YES | YES | YES |
| SPAC1556.01c  | SPBC543.03c   | 0.9999953 | Known | NO  | YES | YES | YES |
| SPBC215.12    | SPBC6B1.07    | 0.9999953 | Known | YES | NO  | YES | YES |
| SPAC664.10    | SPAC25G10.07c | 0.9999953 | Known | YES | YES | NO  | NO  |
| SPAC6G9.06c   | SPCC188.07    | 0.9999953 | Known | YES | YES | NO  | NO  |
| SPCC5E4.04    | SPAC821.08c   | 0.9999953 | Known | YES | YES | YES | YES |
| SPCC23B6.03c  | SPAC1952.07   | 0.9999953 | Known | NO  | YES | YES | YES |
| SPAC19G12.02c | SPBC3E7.08c   | 0.9999953 | Known | NO  | YES | NO  | YES |
| SPAC13F5.06c  | SPCC970.09    | 0.9999953 | Known | YES | YES | YES | NO  |
| SPAC10F6.02c  | SPAC644.12    | 0.9999953 | Known | YES | NO  | NO  | NO  |
| SPAC1687.18c  | SPAC31A2.05c  | 0.9999953 | Known | YES | YES | YES | YES |
| SPAC2F7.03c   | SPBC1706.01   | 0.9999953 | Known | YES | YES | YES | YES |
| SPBC19C7.03   | SPBC887.10    | 0.9999953 | Known | NO  | YES | NO  | NO  |
| SPAC23G3.01   | SPAC19B12.05c | 0.9999952 | Known | NO  | YES | NO  | YES |
| SPBC336.04    | SPBC887.14c   | 0.9999952 | Known | NO  | YES | YES | YES |
| SPCC417.07c   | SPBC365.15    | 0.9999952 | Known | YES | YES | YES | YES |
| SPBP4H10.06c  | SPCC306.03c   | 0.9999952 | Known | YES | NO  | YES | YES |
| SPBC3E7.08c   | SPBC342.05    | 0.9999952 | Known | NO  | NO  | NO  | YES |
| SPBC409.07c   | SPAC1006.09   | 0.9999952 | Known | NO  | YES | YES | YES |
| SPBC336.03    | SPAC16E8.09   | 0.9999952 | Known | NO  | NO  | NO  | YES |
| SPBC23E6.07c  | SPBC947.11c   | 0.9999952 | Known | YES | YES | YES | YES |
| SPAC3H5.06c   | SPAC9E9.08    | 0.9999952 | Known | NO  | NO  | YES | YES |
| SPBC19C7.03   | SPBC106.10    | 0.9999952 | Known | NO  | YES | YES | YES |
| SPBC1709.01   | SPAC20G8.05c  | 0.9999951 | Known | YES | YES | YES | YES |
| SPCC645.14c   | SPBC106.09    | 0.9999951 | Known | NO  | NO  | NO  | NO  |
| SPBC216.05    | SPAC644.14c   | 0.9999951 | Known | NO  | YES | NO  | YES |
| SPCC4B3.15    | SPAC20G8.05c  | 0.9999951 | Known | YES | YES | NO  | YES |
| SPBC3E7.08c   | SPBC336.12c   | 0.9999951 | Known | NO  | NO  | NO  | YES |
| SPAC24H6.05   | SPAC1006.09   | 0.9999951 | Known | NO  | YES | YES | YES |
| SPBC19C7.03   | SPAC1296.03c  | 0.9999951 | Known | NO  | NO  | NO  | NO  |
| SPCC4G3.05c   | SPAC3H5.06c   | 0.9999951 | Known | NO  | YES | YES | YES |
| SPCC18B5.03   | SPBC26H8.10   | 0.9999951 | Known | NO  | YES | NO  | YES |
| SPAC16A10.07c | SPAC1556.01c  | 0.9999951 | Known | NO  | NO  | YES | YES |
| SPBC83.07     | SPAC3H1.12c   | 0.9999951 | Known | YES | NO  | YES | YES |
| SPCC1020.02   | SPBC11C11.03  | 0.9999951 | Known | YES | YES | YES | YES |
| SPCC1739.03   | SPCC736.11    | 0.9999951 | Known | NO  | YES | YES | YES |



|               |               |           |       |     |     |     |     |
|---------------|---------------|-----------|-------|-----|-----|-----|-----|
| SPBC4.04c     | SPAC694.06c   | 0.9999951 | Known | NO  | YES | NO  | YES |
| SPCC417.07c   | SPCC4G3.19    | 0.9999951 | Known | YES | NO  | YES | YES |
| SPBC409.07c   | SPAC9G1.02    | 0.9999951 | Known | YES | YES | YES | YES |
| SPAC13C5.07   | SPAC1556.01c  | 0.999995  | Known | YES | NO  | YES | YES |
| SPCC5E4.06    | SPAC1687.05   | 0.999995  | Known | NO  | NO  | NO  | NO  |
| SPBC19G7.05c  | SPBC582.03    | 0.999995  | Known | NO  | NO  | NO  | YES |
| SPBC3E7.08c   | SPCC306.03c   | 0.9999949 | Known | NO  | NO  | NO  | NO  |
| SPBC16G5.12c  | SPAC2G11.12   | 0.9999949 | Known | YES | YES | YES | YES |
| SPBC646.14c   | SPCC5E4.04    | 0.9999949 | Known | NO  | NO  | NO  | YES |
| SPCC5E4.06    | SPAC19E9.02   | 0.9999949 | Known | NO  | YES | NO  | NO  |
| SPBC1685.15c  | SPCC1322.12c  | 0.9999949 | Known | YES | YES | YES | YES |
| SPAC4H3.11c   | SPCC1739.11c  | 0.9999949 | Known | YES | YES | YES | YES |
| SPAC3C7.03c   | SPBC216.05    | 0.9999949 | Known | NO  | YES | YES | YES |
| SPCC16C4.09   | SPBC336.12c   | 0.9999949 | Known | YES | NO  | NO  | YES |
| SPAC22H10.07  | SPCC645.05c   | 0.9999949 | Known | NO  | YES | NO  | NO  |
| SPBC211.04c   | SPCC16A11.17  | 0.9999949 | Known | YES | YES | YES | YES |
| SPAC17A5.11   | SPBC216.05    | 0.9999948 | Known | YES | YES | YES | YES |
| SPBC216.06c   | SPBC4.04c     | 0.9999948 | Known | NO  | NO  | NO  | YES |
| SPCC338.17c   | SPAC1556.01c  | 0.9999948 | Known | NO  | NO  | YES | YES |
| SPCC4G3.05c   | SPAC2G11.12   | 0.9999948 | Known | NO  | YES | YES | YES |
| SPCC16A11.17  | SPCC1682.02c  | 0.9999948 | Known | YES | YES | YES | YES |
| SPCC736.11    | SPAC18G6.02c  | 0.9999948 | Known | YES | YES | YES | YES |
| SPAC13G6.12c  | SPBC1709.01   | 0.9999948 | Known | YES | YES | NO  | NO  |
| SPAP27G11.10c | SPBC106.10    | 0.9999948 | Known | NO  | NO  | NO  | NO  |
| SPAC19G12.01c | SPBC11C11.04c | 0.9999948 | Known | YES | YES | NO  | YES |
| SPCC970.09    | SPCC1235.10c  | 0.9999947 | Known | YES | YES | YES | NO  |
| SPAC2G11.12   | SPBC19C7.09c  | 0.9999947 | Known | NO  | NO  | NO  | YES |
| SPCC736.14    | SPBC211.04c   | 0.9999947 | Known | NO  | NO  | NO  | YES |
| SPAC23C11.16  | SPAC26H5.05   | 0.9999947 | Known | NO  | NO  | NO  | NO  |
| SPCC23B6.03c  | SPAC20G4.04c  | 0.9999947 | Known | NO  | YES | YES | YES |
| SPCC1259.13   | SPAC343.11c   | 0.9999947 | Known | NO  | YES | NO  | YES |
| SPBC2F12.13   | SPCC736.14    | 0.9999946 | Known | YES | NO  | YES | YES |
| SPBC336.01    | SPAC4H3.05    | 0.9999946 | Known | NO  | YES | YES | YES |
| SPCC126.02c   | SPAC1556.01c  | 0.9999946 | Known | NO  | YES | YES | YES |
| SPBC336.07    | SPBC21H7.05   | 0.9999946 | Known | YES | YES | YES | YES |
| SPAC4A8.05c   | SPBC32H8.12c  | 0.9999946 | Known | YES | YES | YES | YES |
| SPCC188.13c   | SPBC29B5.01   | 0.9999946 | Known | NO  | YES | NO  | YES |
| SPBC19G7.16   | SPCC5E4.04    | 0.9999946 | Known | YES | NO  | NO  | YES |
| SPCC338.17c   | SPBC29A10.04  | 0.9999946 | Known | YES | YES | YES | YES |
| SPBC2F12.13   | SPAC16E8.09   | 0.9999946 | Known | NO  | YES | NO  | YES |
| SPAC24H6.03   | SPCC1494.05c  | 0.9999946 | Known | NO  | NO  | NO  | YES |
| SPBC3B9.16c   | SPBC17G9.04c  | 0.9999945 | Known | YES | YES | YES | YES |
| SPAC3A11.08   | SPCC11E10.08  | 0.9999945 | Known | YES | NO  | YES | YES |
| SPBC146.03c   | SPBC14C8.07c  | 0.9999945 | Known | NO  | YES | NO  | YES |
| SPBC216.07c   | SPAC23C11.11  | 0.9999945 | Known | YES | YES | YES | YES |
| SPAC23C11.11  | SPBC30D10.10c | 0.9999945 | Known | YES | YES | YES | YES |
| SPAC15A10.03c | SPAC4H3.05    | 0.9999945 | Known | YES | YES | NO  | YES |

|               |               |           |       |     |     |     |     |
|---------------|---------------|-----------|-------|-----|-----|-----|-----|
| SPBC4.04c     | SPCC16A11.17  | 0.9999945 | Known | YES | YES | YES | YES |
| SPAC110.02    | SPCC338.17c   | 0.9999945 | Known | YES | YES | NO  | YES |
| SPBC216.06c   | SPBC342.05    | 0.9999945 | Known | NO  | YES | YES | YES |
| SPAC19G12.14  | SPBC12D12.04c | 0.9999945 | Known | YES | YES | NO  | YES |
| SPAC19E9.02   | SPCC1322.12c  | 0.9999945 | Known | NO  | YES | YES | YES |
| SPCC1223.06   | SPBC1604.14c  | 0.9999945 | Known | YES | YES | YES | YES |
| SPAC1952.07   | SPBC216.05    | 0.9999944 | Known | NO  | YES | YES | YES |
| SPBC31F10.13c | SPBC15D4.03   | 0.9999944 | Known | YES | YES | YES | YES |
| SPAC19G12.01c | SPCC1739.11c  | 0.9999944 | Known | YES | YES | NO  | NO  |
| SPBC19G7.05c  | SPBC4F6.12    | 0.9999944 | Known | YES | NO  | NO  | YES |
| SPCC338.17c   | SPAC10F6.09c  | 0.9999944 | Known | YES | YES | YES | YES |
| SPBC215.12    | SPAC644.12    | 0.9999944 | Known | YES | NO  | YES | YES |
| SPAC2F7.03c   | SPAC23C11.16  | 0.9999944 | Known | NO  | YES | YES | YES |
| SPBC4.04c     | SPBC211.04c   | 0.9999944 | Known | YES | YES | YES | YES |
| SPBC13G1.08c  | SPAC3H1.12c   | 0.9999943 | Known | YES | YES | YES | YES |
| SPBC336.12c   | SPBC14C8.14c  | 0.9999943 | Known | NO  | YES | YES | NO  |
| SPAC694.06c   | SPAC1B2.05    | 0.9999943 | Known | NO  | YES | NO  | YES |
| SPAC13G6.01c  | SPAC23C4.18c  | 0.9999943 | Known | NO  | NO  | YES | YES |
| SPAC1556.01c  | SPBC29A10.05  | 0.9999943 | Known | NO  | NO  | YES | NO  |
| SPBC4.04c     | SPCC1682.02c  | 0.9999943 | Known | YES | YES | YES | YES |
| SPBC16G5.12c  | SPBP4H10.06c  | 0.9999943 | Known | NO  | YES | NO  | NO  |
| SPAC9G1.02    | SPBC887.10    | 0.9999943 | Known | YES | NO  | YES | NO  |
| SPBC21.06c    | SPAC23C11.16  | 0.9999942 | Known | YES | YES | YES | YES |
| SPCC663.12    | SPBC25H2.13c  | 0.9999942 | Known | NO  | NO  | NO  | NO  |
| SPBC211.04c   | SPCC895.07    | 0.9999942 | Known | NO  | NO  | NO  | YES |
| SPAC694.06c   | SPBC29A10.15  | 0.9999942 | Known | YES | NO  | YES | YES |
| SPBC3E7.08c   | SPAC13C5.07   | 0.9999942 | Known | NO  | NO  | NO  | YES |
| SPBC342.05    | SPCC306.04c   | 0.9999942 | Known | YES | NO  | YES | YES |
| SPBC216.07c   | SPBC21B10.05c | 0.9999942 | Known | YES | YES | YES | YES |
| SPBC21B10.05c | SPBC30D10.10c | 0.9999942 | Known | YES | NO  | YES | YES |
| SPCC736.14    | SPCC895.07    | 0.9999941 | Known | YES | YES | YES | YES |
| SPAC23C11.16  | SPCC1739.11c  | 0.9999941 | Known | YES | YES | NO  | YES |
| SPCC1322.12c  | SPAC12G12.13c | 0.9999941 | Known | NO  | YES | YES | NO  |
| SPAC13G6.01c  | SPCC338.17c   | 0.9999941 | Known | NO  | NO  | NO  | NO  |
| SPCC18B5.03   | SPBC15D4.03   | 0.9999941 | Known | NO  | YES | NO  | YES |
| SPBC106.09    | SPAC821.08c   | 0.9999941 | Known | NO  | NO  | NO  | YES |
| SPBC216.06c   | SPAC1687.05   | 0.9999941 | Known | NO  | NO  | NO  | YES |
| SPAC1805.17   | SPAC1952.13   | 0.9999941 | Known | NO  | NO  | NO  | NO  |
| SPAC1834.06c  | SPBP19A11.04c | 0.9999941 | Known | YES | YES | YES | YES |
| SPBC21.06c    | SPAC222.10c   | 0.9999941 | Known | YES | YES | YES | YES |
| SPAC926.04c   | SPBC146.09c   | 0.9999941 | Known | NO  | NO  | NO  | NO  |
| SPBC19G7.05c  | SPAPB2B4.03   | 0.999994  | Known | NO  | NO  | NO  | YES |
| SPBC21.06c    | SPBC244.01c   | 0.999994  | Known | YES | YES | YES | YES |
| SPCC1739.11c  | SPBC11C11.02  | 0.999994  | Known | YES | YES | NO  | YES |
| SPAC4F10.15c  | SPBC146.13c   | 0.999994  | Known | YES | YES | YES | YES |
| SPBC16D10.04c | SPAC8F11.07c  | 0.999994  | Known | YES | YES | YES | YES |
| SPBC16C6.09   | SPAC22A12.07c | 0.999994  | Known | YES | YES | YES | NO  |

|               |               |           |       |     |     |     |     |
|---------------|---------------|-----------|-------|-----|-----|-----|-----|
| SPBC2F12.08c  | SPBC28F2.12   | 0.999994  | Known | NO  | YES | NO  | NO  |
| SPCC162.08c   | SPCC364.02c   | 0.999994  | Known | YES | NO  | NO  | NO  |
| SPCC297.03    | SPCC16C4.09   | 0.999994  | Known | YES | NO  | YES | NO  |
| SPAC222.10c   | SPCC1739.11c  | 0.999994  | Known | YES | YES | YES | YES |
| SPBC25D12.03c | SPCC16A11.17  | 0.999994  | Known | YES | YES | YES | YES |
| SPBC1685.15c  | SPBC2F12.13   | 0.999994  | Known | YES | YES | YES | YES |
| SPBC1685.15c  | SPCC736.14    | 0.9999939 | Known | YES | NO  | YES | YES |
| SPAC16A10.07c | SPCC1322.12c  | 0.9999939 | Known | NO  | YES | YES | NO  |
| SPBC365.15    | SPCC736.14    | 0.9999939 | Known | YES | NO  | YES | YES |
| SPBC19C7.03   | SPAC56F8.16   | 0.9999939 | Known | NO  | NO  | NO  | YES |
| SPBC19C7.03   | SPAC8C9.03    | 0.9999939 | Known | NO  | NO  | NO  | YES |
| SPAC2G11.12   | SPAC11E3.08c  | 0.9999939 | Known | NO  | YES | YES | YES |
| SPBC244.01c   | SPCC1739.11c  | 0.9999939 | Known | YES | YES | YES | YES |
| SPBP23A10.13  | SPBC29A10.15  | 0.9999939 | Known | YES | YES | YES | YES |
| SPBC6B1.07    | SPAC644.12    | 0.9999939 | Known | NO  | NO  | YES | YES |
| SPBC19C7.03   | SPBC1718.07c  | 0.9999939 | Known | NO  | YES | YES | NO  |
| SPBC1685.15c  | SPAC16E8.09   | 0.9999939 | Known | YES | YES | NO  | YES |
| SPAC23E2.02   | SPAC30D11.08c | 0.9999939 | Known | YES | YES | YES | NO  |
| SPBC19C7.03   | SPBC646.13    | 0.9999939 | Known | NO  | YES | YES | YES |
| SPBC32H8.12c  | SPAC1F5.04c   | 0.9999938 | Known | YES | NO  | YES | YES |
| SPCC18B5.03   | SPAC57A10.02  | 0.9999938 | Known | NO  | YES | YES | YES |
| SPBC25D12.03c | SPBC211.04c   | 0.9999938 | Known | YES | YES | YES | YES |
| SPBC3E7.08c   | SPCC4G3.05c   | 0.9999938 | Known | NO  | YES | NO  | YES |
| SPAC18B11.10  | SPBC23E6.09   | 0.9999938 | Known | YES | YES | YES | YES |
| SPAC15A10.15  | SPCC1322.12c  | 0.9999938 | Known | YES | NO  | YES | YES |
| SPAC110.02    | SPBC29A10.14  | 0.9999938 | Known | NO  | YES | YES | YES |
| SPBC409.07c   | SPAC1F3.02c   | 0.9999938 | Known | YES | YES | YES | NO  |
| SPBP4H10.06c  | SPBC14C8.07c  | 0.9999938 | Known | NO  | YES | NO  | YES |
| SPCC74.06     | SPBC725.02    | 0.9999938 | Known | NO  | YES | YES | YES |
| SPBC19G7.01c  | SPCC4G3.10c   | 0.9999938 | Known | NO  | NO  | YES | YES |
| SPAC2G11.12   | SPBC776.12c   | 0.9999937 | Known | NO  | YES | NO  | YES |
| SPBP23A10.13  | SPAC3H1.01c   | 0.9999937 | Known | YES | YES | YES | YES |
| SPBC336.12c   | SPBC16A3.11   | 0.9999937 | Known | NO  | YES | NO  | YES |
| SPAC3G9.12    | SPAC3C7.12    | 0.9999937 | Known | YES | YES | NO  | YES |
| SPBC106.20    | SPCC970.09    | 0.9999937 | Known | YES | YES | YES | YES |
| SPBC25D12.03c | SPCC1682.02c  | 0.9999937 | Known | YES | YES | YES | YES |
| SPAC19G12.14  | SPAC22F8.11   | 0.9999937 | Known | NO  | NO  | YES | NO  |
| SPAC630.13c   | SPBC646.09c   | 0.9999937 | Known | YES | YES | YES | YES |
| SPBC336.04    | SPAC9E9.08    | 0.9999937 | Known | NO  | NO  | NO  | YES |
| SPBC1198.11c  | SPAC2G11.12   | 0.9999937 | Known | NO  | NO  | NO  | NO  |
| SPBC216.05    | SPAC20G4.04c  | 0.9999937 | Known | NO  | YES | YES | YES |
| SPAC589.02c   | SPBC31F10.04c | 0.9999937 | Known | YES | NO  | YES | YES |
| SPBC3E7.08c   | SPBC19C7.09c  | 0.9999937 | Known | NO  | YES | YES | YES |
| SPBC725.02    | SPAC27E2.09   | 0.9999937 | Known | NO  | YES | YES | YES |
| SPCC613.12c   | SPCC11E10.08  | 0.9999937 | Known | YES | NO  | YES | YES |
| SPCC645.05c   | SPBC4F6.12    | 0.9999937 | Known | YES | YES | YES | YES |
| SPCC970.07c   | SPCC11E10.08  | 0.9999937 | Known | YES | NO  | YES | YES |

|               |               |           |       |     |     |     |     |
|---------------|---------------|-----------|-------|-----|-----|-----|-----|
| SPAPB1E7.09   | SPAC22A12.07c | 0.9999936 | Known | YES | YES | YES | NO  |
| SPAC24B11.11c | SPCC970.09    | 0.9999936 | Known | NO  | YES | NO  | YES |
| SPAC24H6.09   | SPAC16E8.09   | 0.9999936 | Known | YES | YES | YES | YES |
| SPCC16A11.17  | SPAC1B2.05    | 0.9999936 | Known | YES | YES | YES | YES |
| SPAC1F3.02c   | SPAC1F5.09c   | 0.9999936 | Known | NO  | YES | YES | YES |
| SPCC5E4.03c   | SPAC2G11.14   | 0.9999936 | Known | YES | YES | YES | NO  |
| SPCC1259.13   | SPAC2G11.12   | 0.9999936 | Known | NO  | YES | NO  | YES |
| SPBC29A3.14c  | SPAC16A10.07c | 0.9999936 | Known | NO  | YES | NO  | YES |
| SPCC1840.03   | SPAC24H6.05   | 0.9999936 | Known | YES | NO  | YES | NO  |
| SPBC800.03    | SPCC622.16c   | 0.9999936 | Known | NO  | NO  | YES | YES |
| SPAC17D4.02   | SPAC694.06c   | 0.9999935 | Known | YES | YES | NO  | YES |
| SPBC28F2.12   | SPBC14F5.08   | 0.9999935 | Known | NO  | NO  | NO  | YES |
| SPBC4F6.12    | SPAC4F8.13c   | 0.9999935 | Known | YES | YES | YES | NO  |
| SPAC630.14c   | SPBC23E6.09   | 0.9999935 | Known | YES | YES | YES | YES |
| SPCC16C4.09   | SPBC409.07c   | 0.9999935 | Known | YES | NO  | NO  | YES |
| SPAC24B11.11c | SPBC21.06c    | 0.9999935 | Known | YES | YES | YES | YES |
| SPBC29A10.15  | SPCC16A11.17  | 0.9999935 | Known | YES | YES | YES | YES |
| SPBC211.04c   | SPAC1B2.05    | 0.9999935 | Known | YES | YES | YES | YES |
| SPCC18B5.11c  | SPAC3H5.06c   | 0.9999935 | Known | NO  | YES | YES | YES |
| SPCC417.07c   | SPBC211.06    | 0.9999935 | Known | YES | NO  | YES | YES |
| SPBC16D10.04c | SPAC27E2.05   | 0.9999935 | Known | YES | YES | YES | YES |
| SPBC1778.02   | SPCC1183.05c  | 0.9999934 | Known | NO  | NO  | NO  | YES |
| SPBC17D11.06  | SPAC3H5.06c   | 0.9999934 | Known | YES | YES | YES | YES |
| SPBC365.15    | SPBC428.20c   | 0.9999934 | Known | YES | YES | YES | YES |
| SPBC428.20c   | SPAC4H3.11c   | 0.9999934 | Known | YES | YES | NO  | NO  |
| SPAP27G11.10c | SPAC8C9.03    | 0.9999934 | Known | NO  | NO  | NO  | NO  |
| SPAC1952.13   | SPBC26H8.10   | 0.9999934 | Known | NO  | YES | NO  | YES |
| SPBC582.03    | SPAC2G11.12   | 0.9999934 | Known | NO  | YES | NO  | YES |
| SPCC16C4.09   | SPAC24H6.05   | 0.9999934 | Known | YES | NO  | NO  | YES |
| SPAC6B12.10c  | SPAC3H5.06c   | 0.9999934 | Known | YES | NO  | YES | YES |
| SPAC24B11.11c | SPCC1739.11c  | 0.9999934 | Known | YES | YES | YES | YES |
| SPCC18B5.03   | SPAC19E9.02   | 0.9999934 | Known | NO  | YES | NO  | YES |
| SPAC23C11.16  | SPAC20G8.05c  | 0.9999934 | Known | YES | YES | YES | YES |
| SPCC1682.02c  | SPAC1B2.05    | 0.9999934 | Known | YES | YES | YES | YES |
| SPBC4.04c     | SPBC25D12.03c | 0.9999933 | Known | YES | YES | YES | YES |
| SPAC2G11.14   | SPBC15D4.14   | 0.9999933 | Known | YES | NO  | YES | NO  |
| SPBC1921.03c  | SPAC3C7.08c   | 0.9999933 | Known | NO  | NO  | YES | YES |
| SPAC23C11.16  | SPCC4B3.15    | 0.9999933 | Known | NO  | YES | YES | YES |
| SPAC24B11.06c | SPCC5E4.04    | 0.9999933 | Known | YES | YES | NO  | YES |
| SPBC19G7.01c  | SPAC12B10.12c | 0.9999933 | Known | NO  | NO  | YES | YES |
| SPAC57A10.02  | SPBC15D4.03   | 0.9999933 | Known | NO  | YES | YES | YES |
| SPAC694.06c   | SPAC9E9.08    | 0.9999933 | Known | NO  | NO  | YES | YES |
| SPAC17G6.16c  | SPBC1709.15c  | 0.9999933 | Known | YES | NO  | YES | YES |
| SPBP4H10.04   | SPAC1F3.02c   | 0.9999933 | Known | YES | NO  | NO  | YES |
| SPCC18B5.03   | SPAC19D5.01   | 0.9999933 | Known | NO  | YES | NO  | YES |
| SPAC20G8.05c  | SPBC11C11.02  | 0.9999932 | Known | YES | YES | YES | YES |
| SPCP25A2.02c  | SPAC12B10.12c | 0.9999932 | Known | NO  | YES | NO  | YES |

|               |               |           |       |     |     |     |     |
|---------------|---------------|-----------|-------|-----|-----|-----|-----|
| SPBC1709.01   | SPBC11C11.02  | 0.9999932 | Known | NO  | YES | YES | YES |
| SPCC18B5.03   | SPBC29A10.15  | 0.9999932 | Known | NO  | YES | YES | YES |
| SPBC428.20c   | SPCC4G3.19    | 0.9999932 | Known | YES | NO  | NO  | YES |
| SPAC30D11.10  | SPAC2G11.12   | 0.9999932 | Known | NO  | YES | YES | YES |
| SPBC4C3.05c   | SPBC119.14    | 0.9999932 | Known | NO  | NO  | NO  | NO  |
| SPAC926.04c   | SPCC18B5.03   | 0.9999932 | Known | NO  | YES | NO  | YES |
| SPBC3E7.08c   | SPAC144.13c   | 0.9999932 | Known | NO  | NO  | NO  | YES |
| SPAC24B11.11c | SPAC821.09    | 0.9999932 | Known | NO  | NO  | NO  | YES |
| SPAC20G4.04c  | SPBC25H2.13c  | 0.9999932 | Known | NO  | NO  | NO  | YES |
| SPAC4A8.05c   | SPAC6F6.08c   | 0.9999932 | Known | NO  | YES | NO  | YES |
| SPAC57A7.11   | SPBC19C2.05   | 0.9999932 | Known | YES | YES | NO  | YES |
| SPAC7D4.04    | SPAC16A10.07c | 0.9999932 | Known | NO  | YES | YES | NO  |
| SPCC16C4.09   | SPCC74.03c    | 0.9999931 | Known | YES | NO  | NO  | NO  |
| SPAC27F1.09c  | SPBC146.07    | 0.9999931 | Known | YES | YES | YES | YES |
| SPAC16A10.07c | SPCC1183.05c  | 0.9999931 | Known | NO  | NO  | NO  | YES |
| SPAC57A7.11   | SPBC32C12.02  | 0.9999931 | Known | NO  | NO  | NO  | YES |
| SPBC12C2.10c  | SPBC36.05c    | 0.9999931 | Known | YES | YES | YES | NO  |
| SPBC336.07    | SPAC6F12.11c  | 0.9999931 | Known | YES | YES | YES | YES |
| SPCC576.15c   | SPBC12D12.04c | 0.999993  | Known | NO  | YES | YES | YES |
| SPBC660.07    | SPAC19G12.15c | 0.999993  | Known | NO  | YES | YES | YES |
| SPBC16D10.09  | SPBC216.05    | 0.999993  | Known | NO  | YES | NO  | YES |
| SPBC13G1.08c  | SPCC306.04c   | 0.999993  | Known | YES | NO  | YES | YES |
| SPBC29A3.14c  | SPCC126.02c   | 0.999993  | Known | YES | NO  | NO  | YES |
| SPAC1556.01c  | SPAC30D11.10  | 0.999993  | Known | NO  | NO  | YES | YES |
| SPBC211.02c   | SPAC644.12    | 0.999993  | Known | YES | NO  | YES | NO  |
| SPBC146.03c   | SPBC646.14c   | 0.999993  | Known | NO  | YES | NO  | YES |
| SPBC4.04c     | SPAC1B2.05    | 0.999993  | Known | YES | YES | YES | YES |
| SPAC20G8.01   | SPBC342.05    | 0.999993  | Known | NO  | YES | YES | YES |
| SPAC27F1.04c  | SPCC1020.02   | 0.999993  | Known | YES | YES | YES | YES |
| SPCC1223.06   | SPBC530.04    | 0.999993  | Known | YES | NO  | YES | YES |
| SPBC336.12c   | SPBC342.05    | 0.999993  | Known | NO  | YES | YES | YES |
| SPCC16C4.09   | SPBP4H10.04   | 0.9999929 | Known | YES | NO  | NO  | YES |
| SPBC1718.01   | SPAC17G6.12   | 0.9999929 | Known | YES | NO  | NO  | YES |
| SPBC365.15    | SPCC4G3.19    | 0.9999929 | Known | YES | NO  | NO  | YES |
| SPCC16C4.07   | SPBC21.06c    | 0.9999929 | Known | NO  | NO  | NO  | YES |
| SPCC5E4.06    | SPAC11E3.08c  | 0.9999929 | Known | YES | YES | YES | YES |
| SPBC21.06c    | SPBP4H10.04   | 0.9999929 | Known | NO  | NO  | NO  | YES |
| SPAC1783.07c  | SPAC1805.17   | 0.9999929 | Known | NO  | NO  | YES | YES |
| SPAC1687.05   | SPBC1703.14c  | 0.9999929 | Known | NO  | NO  | NO  | YES |
| SPCC16A11.17  | SPAC23C4.18c  | 0.9999929 | Known | NO  | NO  | YES | YES |
| SPBC216.06c   | SPCC4G3.05c   | 0.9999929 | Known | NO  | YES | YES | YES |
| SPBC19C7.03   | SPAC23H3.13c  | 0.9999929 | Known | NO  | YES | YES | YES |
| SPAC167.03c   | SPBC6B1.07    | 0.9999928 | Known | YES | NO  | YES | NO  |
| SPAC6G10.02c  | SPBC530.04    | 0.9999928 | Known | YES | NO  | YES | YES |
| SPCC1672.02c  | SPBC216.05    | 0.9999928 | Known | NO  | NO  | NO  | YES |
| SPCC16C4.09   | SPAC26F1.10c  | 0.9999928 | Known | NO  | NO  | NO  | YES |
| SPCC16C4.07   | SPCC1739.11c  | 0.9999928 | Known | YES | NO  | NO  | YES |

|               |               |           |       |     |     |     |     |
|---------------|---------------|-----------|-------|-----|-----|-----|-----|
| SPCC16C4.14c  | SPBC21H7.05   | 0.9999928 | Known | YES | YES | YES | YES |
| SPCC576.15c   | SPAC17G8.14c  | 0.9999928 | Known | NO  | YES | YES | YES |
| SPBC32H8.10   | SPAC23C4.19   | 0.9999928 | Known | NO  | YES | NO  | YES |
| SPBP4H10.04   | SPCC1739.11c  | 0.9999928 | Known | YES | NO  | NO  | YES |
| SPAC19G12.01c | SPCC895.07    | 0.9999928 | Known | NO  | YES | NO  | YES |
| SPCP25A2.02c  | SPBC19C7.09c  | 0.9999928 | Known | NO  | NO  | NO  | YES |
| SPAC17D4.02   | SPCC16A11.17  | 0.9999928 | Known | NO  | NO  | YES | YES |
| SPCC18B5.03   | SPBC4C3.12    | 0.9999928 | Known | NO  | NO  | NO  | YES |
| SPAC1565.08   | SPBC887.04c   | 0.9999928 | Known | YES | YES | YES | NO  |
| SPBC21.06c    | SPCC188.02    | 0.9999928 | Known | NO  | NO  | NO  | YES |
| SPBC19C7.03   | SPAC24B11.06c | 0.9999928 | Known | NO  | YES | NO  | YES |
| SPBC2F12.13   | SPBC1604.14c  | 0.9999928 | Known | NO  | YES | NO  | YES |
| SPCC16A11.17  | SPCC1795.11   | 0.9999927 | Known | NO  | YES | NO  | YES |
| SPBC3E7.08c   | SPAC11E3.08c  | 0.9999927 | Known | NO  | NO  | NO  | YES |
| SPAC24H6.05   | SPBC26H8.10   | 0.9999927 | Known | NO  | YES | YES | YES |
| SPCC18B5.03   | SPBC1604.14c  | 0.9999927 | Known | NO  | YES | NO  | YES |
| SPBC6B1.07    | SPCC1795.11   | 0.9999927 | Known | NO  | NO  | NO  | NO  |
| SPCC18B5.03   | SPAC22F3.09c  | 0.9999927 | Known | NO  | YES | NO  | YES |
| SPBC19C7.03   | SPCC285.09c   | 0.9999927 | Known | NO  | NO  | YES | YES |
| SPAC22F3.09c  | SPBC16A3.11   | 0.9999927 | Known | NO  | YES | NO  | YES |
| SPCC188.02    | SPCC1739.11c  | 0.9999926 | Known | YES | NO  | NO  | YES |
| SPAC15A10.08  | SPCC4B3.15    | 0.9999926 | Known | NO  | NO  | NO  | YES |
| SPBC21.06c    | SPAC1782.09c  | 0.9999926 | Known | YES | YES | NO  | YES |
| SPAC20G8.05c  | SPBC1778.06c  | 0.9999926 | Known | NO  | NO  | YES | NO  |
| SPBC1709.01   | SPBC106.20    | 0.9999926 | Known | YES | YES | NO  | NO  |
| SPAC17D4.02   | SPBC211.04c   | 0.9999926 | Known | YES | NO  | YES | YES |
| SPBC12D12.04c | SPBP4H10.04   | 0.9999926 | Known | YES | YES | YES | YES |
| SPBC336.04    | SPBC1105.04c  | 0.9999926 | Known | NO  | YES | NO  | YES |
| SPCC18B5.03   | SPBC16H5.11c  | 0.9999926 | Known | NO  | YES | YES | YES |
| SPAC22H10.10  | SPBC11C11.04c | 0.9999925 | Known | NO  | YES | YES | YES |
| SPBC21B10.05c | SPCC5E4.04    | 0.9999925 | Known | NO  | YES | NO  | NO  |
| SPAC17D4.02   | SPCC1682.02c  | 0.9999925 | Known | NO  | NO  | YES | YES |
| SPBC21C3.20c  | SPBC106.10    | 0.9999925 | Known | NO  | NO  | YES | YES |
| SPBP23A10.13  | SPBC14C8.07c  | 0.9999925 | Known | YES | YES | YES | YES |
| SPBC19G7.01c  | SPBC29A10.05  | 0.9999925 | Known | NO  | NO  | YES | NO  |
| SPAC1782.09c  | SPCC1739.11c  | 0.9999925 | Known | YES | YES | YES | YES |
| SPBC336.03    | SPAC637.07    | 0.9999925 | Known | NO  | NO  | NO  | YES |
| SPCC306.04c   | SPAC14C4.13   | 0.9999924 | Known | YES | NO  | YES | YES |
| SPCC1739.14   | SPBC1921.03c  | 0.9999924 | Known | YES | NO  | NO  | YES |
| SPAC6G10.12c  | SPCC1739.11c  | 0.9999924 | Known | YES | NO  | NO  | YES |
| SPAC24H6.05   | SPBC31F10.13c | 0.9999924 | Known | NO  | YES | YES | YES |
| SPCC645.06c   | SPBC4F6.12    | 0.9999924 | Known | YES | YES | YES | YES |
| SPAC14C4.02c  | SPAC11E3.08c  | 0.9999924 | Known | YES | YES | YES | YES |
| SPAC2G11.12   | SPAC688.06c   | 0.9999924 | Known | NO  | YES | YES | YES |
| SPCC16A11.17  | SPAC14C4.13   | 0.9999924 | Known | NO  | YES | NO  | YES |
| SPAC24H6.05   | SPBC1709.01   | 0.9999924 | Known | NO  | YES | NO  | NO  |
| SPBC25D12.03c | SPAC1B2.05    | 0.9999923 | Known | YES | YES | YES | YES |

|               |               |           |       |     |     |     |     |
|---------------|---------------|-----------|-------|-----|-----|-----|-----|
| SPCC338.17c   | SPBC16A3.11   | 0.9999923 | Known | NO  | YES | NO  | YES |
| SPAC630.13c   | SPAC19E9.03   | 0.9999923 | Known | NO  | YES | NO  | YES |
| SPAC4D7.03    | SPBC1718.01   | 0.9999923 | Known | NO  | YES | YES | YES |
| SPBC12D12.01  | SPBC21.06c    | 0.9999923 | Known | YES | YES | NO  | YES |
| SPBC6B1.07    | SPAC22F8.10c  | 0.9999923 | Known | NO  | NO  | NO  | YES |
| SPBC16A3.05c  | SPAP27G11.10c | 0.9999922 | Known | YES | NO  | NO  | YES |
| SPBC336.04    | SPAC8F11.07c  | 0.9999922 | Known | YES | YES | YES | YES |
| SPCC1223.06   | SPBC15D4.10c  | 0.9999922 | Known | NO  | NO  | YES | NO  |
| SPCC16A11.17  | SPBC1347.10   | 0.9999922 | Known | NO  | NO  | YES | YES |
| SPAC4D7.03    | SPAC17G6.12   | 0.9999922 | Known | NO  | NO  | NO  | YES |
| SPAC4H3.05    | SPCC4G3.05c   | 0.9999922 | Known | NO  | YES | YES | YES |
| SPCC5E4.04    | SPBC14C8.01c  | 0.9999922 | Known | YES | NO  | YES | YES |
| SPBC336.04    | SPCC1259.13   | 0.9999921 | Known | NO  | YES | NO  | YES |
| SPCC777.14    | SPBC713.02c   | 0.9999921 | Known | NO  | NO  | NO  | NO  |
| SPBC1718.06   | SPAC644.06c   | 0.9999921 | Known | NO  | NO  | NO  | NO  |
| SPCP1E11.06   | SPAC806.08c   | 0.9999921 | Known | NO  | NO  | NO  | NO  |
| SPAC2G11.12   | SPBC1921.02   | 0.9999921 | Known | NO  | YES | YES | YES |
| SPBC21.05c    | SPAC16E8.09   | 0.9999921 | Known | NO  | NO  | YES | YES |
| SPAC12G12.03  | SPAC16C9.06c  | 0.9999921 | Known | YES | NO  | NO  | YES |
| SPBC16G5.12c  | SPAC15A10.03c | 0.999992  | Known | NO  | YES | NO  | YES |
| SPCC1322.12c  | SPAC12G12.14c | 0.999992  | Known | NO  | NO  | NO  | NO  |
| SPAC19G12.01c | SPAC959.09c   | 0.999992  | Known | YES | YES | YES | YES |
| SPBP4H10.06c  | SPBC646.14c   | 0.999992  | Known | NO  | YES | NO  | YES |
| SPAC17D4.02   | SPBC4.04c     | 0.999992  | Known | NO  | NO  | YES | YES |
| SPAC767.01c   | SPBC12C2.08   | 0.999992  | Known | YES | YES | YES | NO  |
| SPBC211.04c   | SPBC1347.10   | 0.999992  | Known | YES | NO  | YES | YES |
| SPBC4.04c     | SPCC1795.11   | 0.999992  | Known | YES | YES | NO  | YES |
| SPBC216.06c   | SPCC550.13    | 0.999992  | Known | NO  | YES | YES | YES |
| SPAC24H6.05   | SPBC2F12.13   | 0.999992  | Known | YES | YES | NO  | YES |
| SPAC3C7.12    | SPCC1223.06   | 0.999992  | Known | YES | YES | YES | NO  |
| SPAC18G6.02c  | SPBC83.03c    | 0.999992  | Known | YES | YES | YES | YES |
| SPAC1F7.05    | SPAC23C4.18c  | 0.999992  | Known | NO  | YES | NO  | YES |
| SPAC926.04c   | SPCC613.04c   | 0.999992  | Known | NO  | NO  | NO  | YES |
| SPBC16D10.04c | SPAC3G6.06c   | 0.999992  | Known | YES | YES | YES | YES |
| SPAC17H9.20   | SPCC550.13    | 0.9999919 | Known | NO  | NO  | NO  | YES |
| SPAC17H9.19c  | SPAC17H9.10c  | 0.9999919 | Known | YES | NO  | YES | YES |
| SPAC24H6.05   | SPCC18B5.03   | 0.9999919 | Known | NO  | YES | YES | YES |
| SPBC557.03c   | SPBC26H8.10   | 0.9999919 | Known | NO  | NO  | YES | YES |
| SPCC1682.02c  | SPBC1347.10   | 0.9999919 | Known | NO  | NO  | YES | YES |
| SPCC18B5.03   | SPAC644.06c   | 0.9999919 | Known | NO  | YES | NO  | YES |
| SPBC28F2.12   | SPAC644.04    | 0.9999919 | Known | NO  | YES | NO  | NO  |
| SPBP23A10.13  | SPBC685.09    | 0.9999919 | Known | YES | YES | YES | YES |
| SPAC15A10.03c | SPCC4G3.05c   | 0.9999919 | Known | NO  | YES | YES | YES |
| SPAC17D4.02   | SPAC1F7.05    | 0.9999918 | Known | NO  | YES | NO  | YES |
| SPBC244.01c   | SPAC4H3.11c   | 0.9999918 | Known | YES | YES | YES | YES |
| SPAC630.03    | SPBC146.13c   | 0.9999918 | Known | YES | YES | YES | NO  |
| SPAC3H5.06c   | SPBC1734.02c  | 0.9999918 | Known | NO  | YES | YES | YES |

|               |               |           |       |     |     |     |     |
|---------------|---------------|-----------|-------|-----|-----|-----|-----|
| SPAC16A10.07c | SPBC342.05    | 0.9999918 | Known | NO  | YES | YES | YES |
| SPAC15A10.03c | SPAC14C4.13   | 0.9999918 | Known | NO  | YES | YES | YES |
| SPBC216.07c   | SPBC32F12.09  | 0.9999918 | Known | NO  | NO  | YES | YES |
| SPAC1805.15c  | SPAC11G7.02   | 0.9999918 | Known | YES | YES | YES | NO  |
| SPBC16D10.04c | SPBC1734.02c  | 0.9999918 | Known | NO  | YES | YES | YES |
| SPAC13C5.07   | SPAC25G10.04c | 0.9999918 | Known | NO  | NO  | YES | NO  |
| SPAC6F6.08c   | SPBC28F2.12   | 0.9999918 | Known | NO  | YES | NO  | YES |
| SPBC31F10.11c | SPAC644.12    | 0.9999917 | Known | YES | NO  | YES | NO  |
| SPBC660.14    | SPCC18B5.03   | 0.9999917 | Known | NO  | YES | YES | YES |
| SPAC2G11.12   | SPBC1734.06   | 0.9999917 | Known | NO  | YES | NO  | YES |
| SPBC28F2.12   | SPCC1442.10c  | 0.9999917 | Known | YES | YES | YES | YES |
| SPBC428.08c   | SPCC11E10.08  | 0.9999917 | Known | YES | NO  | YES | YES |
| SPAC644.14c   | SPAC3H5.06c   | 0.9999917 | Known | NO  | YES | YES | YES |
| SPBC582.03    | SPBC19C2.01   | 0.9999917 | Known | NO  | NO  | NO  | NO  |
| SPAC630.13c   | SPAC17G6.04c  | 0.9999917 | Known | NO  | NO  | YES | NO  |
| SPBC19G7.05c  | SPAC6F6.08c   | 0.9999917 | Known | NO  | NO  | NO  | YES |
| SPCC18B5.03   | SPCC338.16    | 0.9999917 | Known | NO  | YES | NO  | YES |
| SPBC342.05    | SPAC23C4.18c  | 0.9999916 | Known | NO  | YES | YES | YES |
| SPBC428.20c   | SPAC806.08c   | 0.9999916 | Known | YES | NO  | NO  | YES |
| SPBC16D10.04c | SPAC644.14c   | 0.9999916 | Known | NO  | YES | YES | YES |
| SPBC336.12c   | SPAC22F3.09c  | 0.9999916 | Known | YES | YES | YES | YES |
| SPCC1259.13   | SPAC694.06c   | 0.9999916 | Known | NO  | YES | NO  | YES |
| SPCC188.02    | SPCC4B3.15    | 0.9999916 | Known | NO  | NO  | NO  | YES |
| SPBC19G7.05c  | SPBC11B10.09  | 0.9999916 | Known | NO  | NO  | NO  | YES |
| SPAC27D7.03c  | SPAC27D7.13c  | 0.9999916 | Known | NO  | YES | YES | NO  |
| SPBC582.03    | SPCC1739.11c  | 0.9999916 | Known | YES | YES | YES | YES |
| SPAPB1E7.02c  | SPAC9E9.08    | 0.9999916 | Known | NO  | NO  | NO  | YES |
| SPAC3A11.14c  | SPAC1786.03   | 0.9999916 | Known | NO  | NO  | NO  | NO  |
| SPBC336.12c   | SPBC17F3.02   | 0.9999916 | Known | YES | YES | NO  | YES |
| SPBC336.04    | SPAC27E2.05   | 0.9999915 | Known | YES | YES | YES | YES |
| SPAC3G6.06c   | SPAC2G11.12   | 0.9999915 | Known | YES | YES | YES | YES |
| SPBC21.06c    | SPAC9G1.09    | 0.9999915 | Known | YES | YES | YES | YES |
| SPBC36.05c    | SPBC2D10.17   | 0.9999915 | Known | NO  | NO  | YES | NO  |
| SPCC285.09c   | SPBC106.09    | 0.9999915 | Known | NO  | NO  | NO  | YES |
| SPBC336.04    | SPCC18B5.11c  | 0.9999915 | Known | NO  | YES | NO  | YES |
| SPBC336.12c   | SPAC23C4.18c  | 0.9999915 | Known | NO  | YES | YES | YES |
| SPAC24H6.09   | SPBC1604.14c  | 0.9999915 | Known | YES | YES | YES | YES |
| SPCC1753.03c  | SPBC1A4.03c   | 0.9999915 | Known | NO  | NO  | NO  | NO  |
| SPCC4G3.05c   | SPBC1703.14c  | 0.9999915 | Known | NO  | NO  | NO  | YES |
| SPAC637.07    | SPAC16E8.09   | 0.9999914 | Known | NO  | YES | NO  | YES |
| SPBC11C11.04c | SPBC26H8.07c  | 0.9999914 | Known | NO  | NO  | YES | YES |
| SPAC1782.09c  | SPCC4B3.15    | 0.9999914 | Known | NO  | YES | YES | YES |
| SPAC222.15    | SPBC216.05    | 0.9999914 | Known | NO  | YES | YES | YES |
| SPBC12D12.04c | SPAC1F5.08c   | 0.9999914 | Known | NO  | NO  | YES | NO  |
| SPBC4.04c     | SPBC1347.10   | 0.9999914 | Known | YES | YES | YES | YES |
| SPAC1F7.05    | SPAC14C4.13   | 0.9999914 | Known | NO  | YES | NO  | YES |
| SPBC216.06c   | SPBC776.12c   | 0.9999914 | Known | NO  | YES | YES | YES |



|               |               |           |       |     |     |     |     |
|---------------|---------------|-----------|-------|-----|-----|-----|-----|
| SPBC13G1.08c  | SPBC83.07     | 0.9999914 | Known | YES | NO  | YES | YES |
| SPAC19G12.01c | SPBP23A10.04  | 0.9999914 | Known | YES | YES | YES | YES |
| SPAC9G1.09    | SPCC1739.11c  | 0.9999914 | Known | YES | YES | YES | YES |
| SPBC19C2.05   | SPCC1739.11c  | 0.9999914 | Known | YES | YES | NO  | YES |
| SPBC336.12c   | SPBC725.16    | 0.9999914 | Known | YES | YES | YES | YES |
| SPAC3H1.01c   | SPBC29A10.15  | 0.9999913 | Known | YES | YES | YES | YES |
| SPAC1006.03c  | SPAC23C11.16  | 0.9999913 | Known | NO  | NO  | NO  | NO  |
| SPCC18B5.03   | SPAC144.13c   | 0.9999913 | Known | NO  | NO  | NO  | YES |
| SPAC4A8.05c   | SPBC24C6.07   | 0.9999913 | Known | NO  | YES | NO  | YES |
| SPCC1672.08c  | SPBC28F2.12   | 0.9999913 | Known | NO  | YES | NO  | YES |
| SPBC1105.04c  | SPBC31F10.13c | 0.9999913 | Known | YES | YES | YES | NO  |
| SPAC2F7.03c   | SPBC800.05c   | 0.9999913 | Known | NO  | NO  | NO  | NO  |
| SPAC17D4.02   | SPBC25D12.03c | 0.9999913 | Known | NO  | NO  | YES | YES |
| SPCC1223.06   | SPCPIE11.04c  | 0.9999913 | Known | YES | YES | NO  | NO  |
| SPBC365.15    | SPAC806.08c   | 0.9999913 | Known | YES | NO  | NO  | YES |
| SPAC2F7.03c   | SPBC26H8.07c  | 0.9999913 | Known | NO  | NO  | NO  | NO  |
| SPAC30D11.09  | SPAC644.12    | 0.9999913 | Known | YES | NO  | YES | NO  |
| SPAC824.04    | SPBC1709.08   | 0.9999913 | Known | YES | NO  | YES | YES |
| SPBC16G5.12c  | SPBC342.05    | 0.9999913 | Known | NO  | YES | NO  | YES |
| SPCC1739.03   | SPAC1B1.01    | 0.9999913 | Known | NO  | NO  | NO  | YES |
| SPAC3G6.06c   | SPAC1556.01c  | 0.9999913 | Known | NO  | YES | YES | YES |
| SPAC19G12.01c | SPAC6F12.15c  | 0.9999912 | Known | YES | YES | YES | YES |
| SPCC18B5.03   | SPAC26F1.10c  | 0.9999912 | Known | NO  | NO  | YES | YES |
| SPAC24H6.05   | SPBC15D4.03   | 0.9999912 | Known | NO  | YES | YES | YES |
| SPBC216.06c   | SPCC1259.13   | 0.9999912 | Known | NO  | YES | NO  | YES |
| SPAC222.10c   | SPAC19E9.02   | 0.9999912 | Known | YES | YES | YES | NO  |
| SPAC13G6.01c  | SPAC664.07c   | 0.9999912 | Known | NO  | NO  | YES | YES |
| SPAC1F5.04c   | SPAC631.01c   | 0.9999912 | Known | YES | NO  | YES | YES |
| SPAC2G11.12   | SPAC644.14c   | 0.9999912 | Known | NO  | YES | YES | YES |
| SPBC530.14c   | SPCC736.14    | 0.9999912 | Known | YES | NO  | NO  | NO  |
| SPBC4.04c     | SPBC14C8.07c  | 0.9999912 | Known | YES | YES | YES | YES |
| SPAC644.06c   | SPBC15D4.03   | 0.9999912 | Known | NO  | NO  | NO  | YES |
| SPAC19G12.01c | SPAC17C9.01c  | 0.9999912 | Known | YES | YES | YES | YES |
| SPAC1B9.02c   | SPAC23C11.16  | 0.9999911 | Known | NO  | YES | YES | NO  |
| SPBC1105.04c  | SPCC16A11.17  | 0.9999911 | Known | NO  | NO  | YES | YES |
| SPAC22H10.07  | SPBC2F12.13   | 0.9999911 | Known | NO  | YES | NO  | YES |
| SPCC736.14    | SPAC1782.09c  | 0.9999911 | Known | YES | NO  | YES | NO  |
| SPAC1834.08   | SPBC725.02    | 0.9999911 | Known | NO  | YES | YES | NO  |
| SPCC4G3.05c   | SPBC342.05    | 0.9999911 | Known | NO  | YES | YES | YES |
| SPAC1783.03   | SPCC1020.02   | 0.9999911 | Known | NO  | YES | YES | NO  |
| SPCC126.02c   | SPBC342.05    | 0.9999911 | Known | NO  | NO  | YES | YES |
| SPCC736.11    | SPBC29B5.01   | 0.9999911 | Known | NO  | YES | NO  | YES |
| SPAC20G8.01   | SPAC9E9.08    | 0.9999911 | Known | NO  | NO  | NO  | YES |
| SPBC211.06    | SPBC428.20c   | 0.9999911 | Known | YES | NO  | YES | YES |
| SPCC645.06c   | SPBC651.03c   | 0.9999911 | Known | NO  | NO  | YES | NO  |
| SPAC11H11.06  | SPBC146.13c   | 0.9999911 | Known | YES | YES | YES | NO  |
| SPAPB1E7.02c  | SPCC338.16    | 0.9999911 | Known | NO  | YES | YES | YES |

|               |               |           |       |     |     |     |     |
|---------------|---------------|-----------|-------|-----|-----|-----|-----|
| SPCC4G3.19    | SPAC806.08c   | 0.999991  | Known | YES | NO  | YES | YES |
| SPAC1687.20c  | SPCC290.04    | 0.999991  | Known | NO  | NO  | YES | YES |
| SPBC428.08c   | SPAC18G6.02c  | 0.999991  | Known | YES | YES | YES | YES |
| SPBC6B1.07    | SPBC119.13c   | 0.999991  | Known | YES | NO  | YES | NO  |
| SPAC1F3.02c   | SPBC119.08    | 0.999991  | Known | YES | YES | YES | YES |
| SPBC1685.15c  | SPAC24H6.05   | 0.9999909 | Known | YES | YES | NO  | YES |
| SPCC18B5.11c  | SPAC694.06c   | 0.9999909 | Known | NO  | YES | YES | YES |
| SPAC22H10.07  | SPAC16E8.09   | 0.9999909 | Known | YES | YES | YES | YES |
| SPAC3A11.08   | SPCC970.07c   | 0.9999909 | Known | YES | NO  | YES | YES |
| SPBC23E6.07c  | SPAC8F11.07c  | 0.9999909 | Known | YES | YES | NO  | NO  |
| SPBC800.05c   | SPCC1322.12c  | 0.9999909 | Known | NO  | NO  | NO  | YES |
| SPAC17C9.05c  | SPBC28F2.12   | 0.9999909 | Known | NO  | YES | NO  | YES |
| SPBC17D11.05  | SPBC646.09c   | 0.9999909 | Known | YES | YES | NO  | YES |
| SPAC17C9.13c  | SPCC5E4.04    | 0.9999909 | Known | NO  | NO  | NO  | YES |
| SPAC20H4.07   | SPAC2G11.12   | 0.9999909 | Known | NO  | YES | YES | YES |
| SPBC26H8.07c  | SPCC11E10.08  | 0.9999909 | Known | NO  | NO  | NO  | YES |
| SPAC57A10.05c | SPAC17G6.12   | 0.9999909 | Known | YES | NO  | YES | YES |
| SPBC428.08c   | SPCC622.16c   | 0.9999909 | Known | NO  | YES | YES | YES |
| SPAC24H6.05   | SPAC57A10.02  | 0.9999908 | Known | NO  | YES | YES | YES |
| SPCPIE11.04c  | SPAC688.11    | 0.9999908 | Known | YES | YES | YES | NO  |
| SPBC216.05    | SPBC20F10.06  | 0.9999908 | Known | NO  | YES | NO  | YES |
| SPCPJ732.01   | SPAC458.05    | 0.9999908 | Known | YES | NO  | NO  | NO  |
| SPAC23C11.15  | SPAC29A4.18   | 0.9999908 | Known | YES | YES | YES | YES |
| SPCC16A11.17  | SPBC776.12c   | 0.9999908 | Known | NO  | YES | YES | YES |
| SPBC1778.02   | SPAC16A10.07c | 0.9999908 | Known | YES | YES | YES | YES |
| SPAC17D4.02   | SPAC1B2.05    | 0.9999908 | Known | NO  | YES | YES | YES |
| SPCC5E4.06    | SPBC1921.02   | 0.9999908 | Known | NO  | YES | YES | YES |
| SPCC4G3.07c   | SPBC146.09c   | 0.9999908 | Known | YES | YES | YES | NO  |
| SPAC3C7.03c   | SPAC2G11.12   | 0.9999908 | Known | NO  | YES | YES | YES |
| SPAC1851.04c  | SPBC4F6.12    | 0.9999908 | Known | NO  | NO  | NO  | NO  |
| SPCC736.11    | SPBC83.03c    | 0.9999907 | Known | YES | YES | YES | YES |
| SPAC18G6.02c  | SPAC1B1.01    | 0.9999907 | Known | NO  | NO  | NO  | YES |
| SPBC582.05c   | SPAC11E3.08c  | 0.9999907 | Known | NO  | NO  | NO  | YES |
| SPAC24H6.05   | SPBC336.12c   | 0.9999907 | Known | YES | YES | NO  | YES |
| SPAC589.02c   | SPBC14F5.08   | 0.9999907 | Known | YES | NO  | YES | YES |
| SPCC16A11.17  | SPAC8F11.07c  | 0.9999907 | Known | NO  | NO  | NO  | YES |
| SPAC644.12    | SPAC22F8.10c  | 0.9999907 | Known | YES | NO  | NO  | YES |
| SPBC19C2.05   | SPBC26H8.10   | 0.9999907 | Known | NO  | YES | NO  | NO  |
| SPAC664.01c   | SPAC3H5.06c   | 0.9999907 | Known | NO  | YES | NO  | NO  |
| SPAC19G12.02c | SPBC29A10.05  | 0.9999907 | Known | NO  | NO  | YES | NO  |
| SPBC16G5.12c  | SPAC1687.05   | 0.9999906 | Known | NO  | NO  | NO  | YES |
| SPBC365.15    | SPBC211.06    | 0.9999906 | Known | YES | NO  | YES | YES |
| SPAC16C9.06c  | SPBC16A3.18   | 0.9999906 | Known | YES | NO  | NO  | YES |
| SPBC211.04c   | SPBC776.12c   | 0.9999906 | Known | NO  | YES | YES | YES |
| SPAC17D4.02   | SPBC29A10.15  | 0.9999906 | Known | YES | NO  | YES | YES |
| SPCC1259.13   | SPCC16A11.17  | 0.9999906 | Known | NO  | YES | NO  | YES |
| SPAC23C11.16  | SPBC244.01c   | 0.9999906 | Known | YES | YES | NO  | YES |

|               |               |           |       |     |     |     |     |
|---------------|---------------|-----------|-------|-----|-----|-----|-----|
| SPAC23G3.01   | SPBC14F5.08   | 0.9999906 | Known | NO  | NO  | NO  | YES |
| SPCC18B5.03   | SPBC2G2.01c   | 0.9999906 | Known | NO  | NO  | NO  | NO  |
| SPBC215.03c   | SPAC17H9.10c  | 0.9999906 | Known | YES | NO  | YES | YES |
| SPAC22F3.13   | SPBC646.09c   | 0.9999906 | Known | YES | YES | NO  | YES |
| SPBC342.05    | SPBC14C8.07c  | 0.9999906 | Known | NO  | NO  | YES | YES |
| SPBC342.05    | SPCC338.16    | 0.9999906 | Known | NO  | YES | YES | YES |
| SPCC4G3.05c   | SPAPB1E7.06c  | 0.9999906 | Known | YES | YES | YES | YES |
| SPCC5E4.03c   | SPAC6F12.15c  | 0.9999905 | Known | NO  | YES | NO  | YES |
| SPAC694.06c   | SPCC4B3.12    | 0.9999905 | Known | YES | NO  | YES | YES |
| SPCC645.05c   | SPAC6F6.08c   | 0.9999905 | Known | NO  | YES | NO  | YES |
| SPAC17C9.01c  | SPAC6F12.15c  | 0.9999905 | Known | YES | YES | YES | YES |
| SPCC4B3.15    | SPAC1F5.08c   | 0.9999905 | Known | NO  | NO  | NO  | NO  |
| SPBC646.09c   | SPBP19A11.03c | 0.9999905 | Known | NO  | YES | YES | YES |
| SPBC660.14    | SPBC336.12c   | 0.9999905 | Known | NO  | NO  | NO  | YES |
| SPBC6B1.07    | SPBC36.09     | 0.9999905 | Known | NO  | NO  | YES | YES |
| SPBC216.06c   | SPCC18B5.11c  | 0.9999905 | Known | NO  | YES | YES | YES |
| SPAC3C7.03c   | SPAC1556.01c  | 0.9999905 | Known | NO  | YES | YES | YES |
| SPCC188.13c   | SPAC664.01c   | 0.9999905 | Known | NO  | NO  | YES | YES |
| SPAC17G6.12   | SPCC338.16    | 0.9999904 | Known | NO  | NO  | NO  | YES |
| SPAC18G6.15   | SPAC3G9.12    | 0.9999904 | Known | YES | YES | YES | YES |
| SPBC409.09c   | SPCC1020.02   | 0.9999904 | Known | YES | YES | YES | YES |
| SPCC126.02c   | SPAC1687.05   | 0.9999904 | Known | NO  | NO  | NO  | YES |
| SPBC3D6.09    | SPBC25H2.13c  | 0.9999904 | Known | YES | YES | YES | NO  |
| SPBC776.12c   | SPBC16A3.11   | 0.9999904 | Known | NO  | YES | NO  | YES |
| SPBP23A10.13  | SPBC646.14c   | 0.9999904 | Known | YES | YES | YES | YES |
| SPAC458.05    | SPAPJ696.01c  | 0.9999904 | Known | NO  | NO  | NO  | NO  |
| SPCC417.07c   | SPBC902.06    | 0.9999903 | Known | YES | YES | YES | YES |
| SPAC222.10c   | SPBC244.01c   | 0.9999903 | Known | YES | YES | YES | YES |
| SPCC5E4.06    | SPBC651.10    | 0.9999903 | Known | YES | YES | YES | YES |
| SPAC1556.01c  | SPAC17A5.11   | 0.9999903 | Known | NO  | YES | YES | YES |
| SPCC4G3.10c   | SPAC12B10.12c | 0.9999903 | Known | YES | YES | YES | YES |
| SPBC582.03    | SPCC16A11.17  | 0.9999903 | Known | NO  | NO  | NO  | YES |
| SPBC211.06    | SPCC4G3.19    | 0.9999903 | Known | YES | NO  | YES | YES |
| SPBC409.07c   | SPAC1751.01c  | 0.9999903 | Known | NO  | NO  | NO  | YES |
| SPBC16A3.15c  | SPAC18G6.02c  | 0.9999903 | Known | NO  | NO  | NO  | NO  |
| SPBC6B1.07    | SPAC22A12.09c | 0.9999902 | Known | NO  | NO  | YES | YES |
| SPCC18B5.03   | SPCC1259.13   | 0.9999902 | Known | YES | YES | YES | YES |
| SPBC29A10.15  | SPAC9E9.08    | 0.9999902 | Known | NO  | NO  | YES | YES |
| SPBC1D7.05    | SPBC1604.14c  | 0.9999902 | Known | NO  | YES | YES | YES |
| SPBC12D12.01  | SPAC14C4.05c  | 0.9999902 | Known | NO  | NO  | NO  | NO  |
| SPBC21.06c    | SPBC1718.07c  | 0.9999902 | Known | NO  | YES | NO  | YES |
| SPAC57A7.08   | SPAC3F10.02c  | 0.9999902 | Known | NO  | NO  | YES | NO  |
| SPBC36.05c    | SPAC23C11.15  | 0.9999902 | Known | YES | YES | YES | YES |
| SPCC777.14    | SPBC6B1.07    | 0.9999902 | Known | NO  | NO  | YES | YES |
| SPAC6F12.15c  | SPBC15D4.14   | 0.9999902 | Known | NO  | NO  | NO  | YES |
| SPAC24H6.05   | SPAC19E9.02   | 0.9999901 | Known | NO  | YES | YES | YES |
| SPAC16A10.07c | SPAC13C5.07   | 0.9999901 | Known | NO  | YES | YES | YES |

|               |               |           |       |     |     |     |     |
|---------------|---------------|-----------|-------|-----|-----|-----|-----|
| SPBC106.09    | SPBC14C8.01c  | 0.9999901 | Known | NO  | NO  | NO  | YES |
| SPAC14C4.02c  | SPBC1921.02   | 0.9999901 | Known | NO  | YES | YES | YES |
| SPBC29A10.15  | SPAC14C4.13   | 0.9999901 | Known | YES | YES | YES | YES |
| SPAC821.09    | SPAC14C4.09   | 0.9999901 | Known | YES | NO  | YES | YES |
| SPBC16C6.06   | SPAC4G9.13c   | 0.9999901 | Known | NO  | NO  | YES | NO  |
| SPAC24B11.11c | SPAPYUG7.03c  | 0.9999901 | Known | YES | NO  | NO  | NO  |
| SPBC1347.10   | SPAC1B2.05    | 0.9999901 | Known | YES | YES | YES | YES |
| SPBC3E7.08c   | SPBC1734.06   | 0.9999901 | Known | NO  | YES | NO  | YES |
| SPCC18B5.03   | SPAC821.08c   | 0.9999901 | Known | NO  | YES | YES | YES |
| SPAC23E2.03c  | SPAC27D7.03c  | 0.9999901 | Known | YES | YES | NO  | YES |
| SPAC24H6.06   | SPAC17D4.02   | 0.99999   | Known | YES | YES | YES | YES |
| SPAC589.02c   | SPAC23H4.17c  | 0.99999   | Known | YES | NO  | YES | YES |
| SPBC12D12.04c | SPBC119.08    | 0.99999   | Known | YES | YES | YES | YES |
| SPBC16G5.15c  | SPBC4C3.12    | 0.99999   | Known | YES | YES | YES | YES |
| SPBC1718.07c  | SPCC1739.11c  | 0.99999   | Known | NO  | YES | NO  | YES |
| SPAC57A10.02  | SPBC649.05    | 0.99999   | Known | NO  | YES | NO  | YES |
| SPBC16H5.11c  | SPBC1604.14c  | 0.99999   | Known | YES | YES | YES | YES |
| SPAC24H6.05   | SPAC19D5.01   | 0.99999   | Known | YES | YES | YES | YES |
| SPAC688.08    | SPBC14F5.08   | 0.99999   | Known | YES | YES | YES | YES |
| SPBC6B1.10    | SPAC644.12    | 0.9999899 | Known | YES | NO  | YES | NO  |
| SPCC126.02c   | SPBC543.03c   | 0.9999899 | Known | YES | YES | YES | YES |
| SPAC15A10.03c | SPCC1259.13   | 0.9999899 | Known | NO  | YES | NO  | YES |
| SPCC188.11    | SPAC644.12    | 0.9999899 | Known | YES | YES | YES | NO  |
| SPCC338.17c   | SPAC6F12.15c  | 0.9999899 | Known | NO  | YES | NO  | YES |
| SPBC4.04c     | SPBC776.12c   | 0.9999899 | Known | NO  | YES | YES | YES |
| SPBC29A10.15  | SPBC1347.10   | 0.9999899 | Known | YES | NO  | YES | YES |
| SPBC3E7.08c   | SPAC3G6.06c   | 0.9999899 | Known | NO  | YES | NO  | YES |
| SPBC725.16    | SPAC22F3.09c  | 0.9999899 | Known | YES | YES | YES | YES |
| SPAC19G12.15c | SPAC328.03    | 0.9999899 | Known | NO  | YES | YES | YES |
| SPAC17A5.02c  | SPCC18B5.03   | 0.9999898 | Known | NO  | NO  | NO  | NO  |
| SPBC6B1.07    | SPAC227.12    | 0.9999898 | Known | YES | NO  | YES | NO  |
| SPAC222.10c   | SPAC6F12.12   | 0.9999898 | Known | NO  | NO  | NO  | YES |
| SPAC1F7.05    | SPBC2G2.01c   | 0.9999898 | Known | NO  | NO  | NO  | NO  |
| SPBC4.04c     | SPAC8F11.07c  | 0.9999898 | Known | NO  | NO  | NO  | YES |
| SPAC19G12.14  | SPBP4H10.04   | 0.9999898 | Known | NO  | NO  | YES | YES |
| SPBC119.08    | SPAC17G8.14c  | 0.9999898 | Known | YES | YES | YES | YES |
| SPAC6G9.08    | SPBP19A11.03c | 0.9999898 | Known | NO  | NO  | NO  | YES |
| SPAC4H3.05    | SPAC30D11.10  | 0.9999898 | Known | NO  | NO  | NO  | YES |
| SPAC17D4.02   | SPAC23C4.18c  | 0.9999897 | Known | YES | YES | YES | YES |
| SPAC18G6.15   | SPCC1020.02   | 0.9999897 | Known | NO  | YES | YES | YES |
| SPAC22E12.07  | SPAC1805.17   | 0.9999897 | Known | NO  | NO  | NO  | NO  |
| SPAC22H10.10  | SPCC895.07    | 0.9999897 | Known | NO  | YES | YES | YES |
| SPBC725.13c   | SPBC216.05    | 0.9999897 | Known | NO  | NO  | NO  | YES |
| SPAPB1E7.02c  | SPBC776.12c   | 0.9999897 | Known | NO  | YES | YES | YES |
| SPBC21.06c    | SPAC1006.08   | 0.9999897 | Known | NO  | NO  | NO  | YES |
| SPCC1259.13   | SPBC4.04c     | 0.9999897 | Known | YES | YES | NO  | YES |
| SPBC215.03c   | SPCC1494.05c  | 0.9999897 | Known | NO  | NO  | NO  | YES |

|               |               |           |       |     |     |     |     |
|---------------|---------------|-----------|-------|-----|-----|-----|-----|
| SPBC336.01    | SPAC30D11.10  | 0.9999897 | Known | NO  | YES | YES | YES |
| SPBC2D10.06   | SPBC16A3.11   | 0.9999897 | Known | NO  | YES | NO  | NO  |
| SPAC13D6.04c  | SPAC24H6.03   | 0.9999896 | Known | NO  | NO  | NO  | YES |
| SPAC14C4.02c  | SPBC651.10    | 0.9999896 | Known | YES | YES | YES | YES |
| SPAC926.04c   | SPBC660.14    | 0.9999896 | Known | NO  | YES | NO  | YES |
| SPBC21.06c    | SPBC18H10.04c | 0.9999896 | Known | NO  | NO  | NO  | YES |
| SPBC216.07c   | SPBC428.16c   | 0.9999896 | Known | NO  | YES | YES | YES |
| SPBC428.16c   | SPBC30D10.10c | 0.9999896 | Known | NO  | NO  | NO  | YES |
| SPBC29A10.15  | SPBC14C8.07c  | 0.9999896 | Known | YES | YES | YES | YES |
| SPCC18B5.03   | SPBC21D10.12  | 0.9999896 | Known | NO  | YES | NO  | NO  |
| SPBC24C6.07   | SPBC28F2.12   | 0.9999896 | Known | NO  | YES | NO  | YES |
| SPAC24H6.05   | SPAC23C11.16  | 0.9999896 | Known | YES | YES | NO  | YES |
| SPAC16A10.07c | SPAC9E9.08    | 0.9999896 | Known | NO  | NO  | YES | YES |
| SPAC926.04c   | SPAC821.04c   | 0.9999896 | Known | YES | YES | NO  | YES |
| SPBC14F5.03c  | SPCC364.02c   | 0.9999895 | Known | YES | NO  | NO  | NO  |
| SPCC970.07c   | SPCC613.12c   | 0.9999895 | Known | YES | YES | YES | YES |
| SPAC19G12.01c | SPAC6F12.14   | 0.9999895 | Known | YES | YES | YES | YES |
| SPAC4D7.03    | SPBC14C8.07c  | 0.9999895 | Known | NO  | NO  | NO  | YES |
| SPCC553.09c   | SPBC29A10.15  | 0.9999895 | Known | YES | NO  | YES | YES |
| SPAC2F3.15    | SPAC23C11.16  | 0.9999895 | Known | NO  | YES | YES | YES |
| SPBC4F6.12    | SPAC20G8.05c  | 0.9999895 | Known | YES | YES | YES | YES |
| SPAC458.03    | SPBC1604.17c  | 0.9999895 | Known | YES | YES | YES | NO  |
| SPAC2F7.03c   | SPBC32H8.12c  | 0.9999895 | Known | NO  | YES | NO  | YES |
| SPBC23G7.04c  | SPAC644.06c   | 0.9999895 | Known | YES | NO  | NO  | NO  |
| SPAC26H5.06   | SPAC1687.05   | 0.9999895 | Known | NO  | NO  | NO  | NO  |
| SPBC13E7.02   | SPAC644.12    | 0.9999895 | Known | YES | YES | YES | NO  |
| SPCC1259.13   | SPBC1703.14c  | 0.9999895 | Known | NO  | YES | NO  | YES |
| SPBC887.14c   | SPAC8F11.07c  | 0.9999894 | Known | NO  | NO  | YES | YES |
| SPAC16A10.07c | SPCC126.02c   | 0.9999894 | Known | NO  | YES | YES | YES |
| SPAC24B11.11c | SPBC4C3.12    | 0.9999894 | Known | NO  | NO  | NO  | YES |
| SPCC18B5.03   | SPCC18B5.11c  | 0.9999894 | Known | NO  | YES | YES | YES |
| SPBC18H10.04c | SPCC1739.11c  | 0.9999894 | Known | NO  | NO  | YES | YES |
| SPBC3E7.08c   | SPAC644.14c   | 0.9999894 | Known | NO  | YES | NO  | YES |
| SPAC16A10.07c | SPAC14C4.13   | 0.9999894 | Known | NO  | NO  | YES | YES |
| SPBC19G7.05c  | SPBC24C6.07   | 0.9999894 | Known | NO  | NO  | NO  | YES |
| SPCC1259.13   | SPAC1F7.05    | 0.9999894 | Known | YES | YES | NO  | YES |
| SPBC4F6.12    | SPCC4B3.15    | 0.9999894 | Known | YES | YES | YES | YES |
| SPBC543.07    | SPAC1F3.02c   | 0.9999894 | Known | YES | YES | YES | YES |
| SPAC24B11.11c | SPBC244.01c   | 0.9999894 | Known | YES | YES | YES | YES |
| SPAC13D6.01   | SPBC17D11.05  | 0.9999894 | Known | NO  | YES | NO  | NO  |
| SPBC12D12.01  | SPBC342.05    | 0.9999894 | Known | NO  | YES | NO  | NO  |
| SPBC582.03    | SPBC4.04c     | 0.9999894 | Known | NO  | NO  | NO  | YES |
| SPAC664.01c   | SPBC29A10.04  | 0.9999893 | Known | NO  | YES | NO  | YES |
| SPAC13C5.07   | SPAC9E9.08    | 0.9999893 | Known | NO  | NO  | YES | YES |
| SPAC15A10.03c | SPAC30D11.10  | 0.9999893 | Known | NO  | NO  | YES | YES |
| SPAC3H1.01c   | SPBC14C8.07c  | 0.9999893 | Known | YES | NO  | YES | YES |
| SPAC17G6.16c  | SPAC12G12.14c | 0.9999893 | Known | YES | NO  | YES | YES |

|               |               |           |       |     |     |     |     |
|---------------|---------------|-----------|-------|-----|-----|-----|-----|
| SPBC4.07c     | SPBP19A11.03c | 0.9999893 | Known | YES | YES | YES | YES |
| SPAC9E9.08    | SPAC23C4.18c  | 0.9999893 | Known | NO  | NO  | YES | YES |
| SPCC736.11    | SPAC1B1.01    | 0.9999893 | Known | NO  | NO  | NO  | YES |
| SPBC6B1.09c   | SPAC13C5.07   | 0.9999893 | Known | YES | YES | YES | YES |
| SPBC649.05    | SPAC19E9.02   | 0.9999892 | Known | YES | YES | YES | YES |
| SPBC2F12.08c  | SPAC23C4.19   | 0.9999892 | Known | NO  | YES | NO  | NO  |
| SPAC24H6.05   | SPBC4C3.12    | 0.9999892 | Known | NO  | NO  | NO  | YES |
| SPAPI698.03c  | SPAC23C11.11  | 0.9999892 | Known | NO  | NO  | NO  | NO  |
| SPCC126.02c   | SPAC13C5.07   | 0.9999892 | Known | NO  | NO  | YES | YES |
| SPAC1420.03   | SPBP19A11.03c | 0.9999892 | Known | NO  | YES | YES | YES |
| SPAC13C5.07   | SPAC14C4.13   | 0.9999892 | Known | NO  | NO  | YES | YES |
| SPAC664.01c   | SPAC6F12.09   | 0.9999892 | Known | YES | NO  | YES | NO  |
| SPAPB8E5.02c  | SPBP19A11.03c | 0.9999892 | Novel | NO  | YES | YES | YES |
| SPAC630.03    | SPCC1672.06c  | 0.9999892 | Known | YES | YES | NO  | NO  |
| SPAC23C4.18c  | SPAC14C4.13   | 0.9999892 | Known | NO  | NO  | YES | YES |
| SPBC32F12.04  | SPBC2F12.13   | 0.9999892 | Known | YES | NO  | NO  | YES |
| SPCC18B5.03   | SPAC144.17c   | 0.9999892 | Known | NO  | YES | NO  | NO  |
| SPAC977.10    | SPAC3F10.02c  | 0.9999892 | Known | YES | NO  | NO  | NO  |
| SPAC24H6.05   | SPBC1604.14c  | 0.9999892 | Known | NO  | YES | NO  | YES |
| SPBC32F12.04  | SPCC736.14    | 0.9999892 | Known | YES | NO  | NO  | YES |
| SPAC24H6.05   | SPAC22F3.09c  | 0.9999891 | Known | YES | YES | NO  | YES |
| SPBC20F10.04c | SPAC2G11.12   | 0.9999891 | Known | YES | YES | YES | YES |
| SPBC12D12.01  | SPAC222.14c   | 0.9999891 | Known | NO  | NO  | NO  | NO  |
| SPBC146.07    | SPAC644.12    | 0.9999891 | Known | NO  | NO  | YES | YES |
| SPAC19D5.01   | SPAC26F1.10c  | 0.9999891 | Known | NO  | YES | YES | YES |
| SPAC22E12.09c | SPBC28F2.10c  | 0.9999891 | Known | NO  | NO  | NO  | NO  |
| SPBC428.08c   | SPAC29B12.02c | 0.9999891 | Known | NO  | NO  | YES | NO  |
| SPAC664.07c   | SPCC306.04c   | 0.9999891 | Known | NO  | NO  | YES | YES |
| SPAC4F8.13c   | SPAC631.01c   | 0.9999891 | Known | NO  | NO  | YES | YES |
| SPBC342.05    | SPAC8F11.07c  | 0.9999891 | Known | NO  | YES | NO  | YES |
| SPCC1620.09c  | SPAC19B12.05c | 0.9999891 | Known | NO  | NO  | NO  | YES |
| SPAC24H6.05   | SPBC17F3.02   | 0.9999891 | Known | YES | YES | NO  | YES |
| SPBC800.03    | SPBC29B5.01   | 0.9999891 | Known | YES | NO  | YES | YES |
| SPBC1D7.05    | SPAC1F5.09c   | 0.999989  | Known | NO  | YES | YES | YES |
| SPCC594.05c   | SPCC306.04c   | 0.999989  | Known | YES | NO  | YES | YES |
| SPBC1604.14c  | SPAC1F5.09c   | 0.999989  | Known | NO  | YES | YES | YES |
| SPBC31E1.05   | SPCC895.07    | 0.999989  | Known | NO  | NO  | NO  | NO  |
| SPCC1223.06   | SPCC16C4.08c  | 0.999989  | Known | NO  | YES | YES | YES |
| SPAC56F8.10   | SPAC343.10    | 0.999989  | Known | NO  | YES | NO  | NO  |
| SPAC6F12.14   | SPAC23C11.16  | 0.999989  | Known | NO  | YES | NO  | NO  |
| SPBC11B10.09  | SPBC146.03c   | 0.999989  | Known | NO  | YES | NO  | YES |
| SPCC1259.13   | SPBC342.05    | 0.999989  | Known | NO  | YES | YES | YES |
| SPBC25D12.03c | SPBC776.12c   | 0.9999889 | Known | NO  | YES | YES | YES |
| SPBP8B7.14c   | SPAC23C4.18c  | 0.9999889 | Known | YES | NO  | YES | YES |
| SPBC16G5.01   | SPBC106.09    | 0.9999889 | Known | NO  | NO  | NO  | YES |
| SPAC24H6.05   | SPBC16H5.11c  | 0.9999889 | Known | NO  | YES | NO  | YES |
| SPAC23C4.18c  | SPBC1347.10   | 0.9999889 | Known | YES | YES | YES | YES |

|               |               |           |       |     |     |     |     |
|---------------|---------------|-----------|-------|-----|-----|-----|-----|
| SPBC4.04c     | SPAC27E2.05   | 0.9999889 | Known | NO  | YES | NO  | YES |
| SPAC890.02c   | SPCC895.07    | 0.9999889 | Known | YES | YES | YES | YES |
| SPAC12B10.12c | SPBC19C7.09c  | 0.9999889 | Known | NO  | NO  | YES | YES |
| SPBC36.05c    | SPCC622.16c   | 0.9999889 | Known | NO  | YES | YES | YES |
| SPAC19G12.10c | SPCC364.02c   | 0.9999889 | Known | NO  | YES | NO  | NO  |
| SPBC16G5.12c  | SPAC9E9.08    | 0.9999889 | Known | NO  | NO  | NO  | YES |
| SPBC660.14    | SPAC22F3.09c  | 0.9999888 | Known | NO  | NO  | NO  | YES |
| SPAC15A10.08  | SPBC1778.06c  | 0.9999888 | Known | YES | YES | YES | YES |
| SPCC18B5.11c  | SPBC4.04c     | 0.9999888 | Known | NO  | YES | NO  | YES |
| SPAC24B11.11c | SPAC6F12.12   | 0.9999888 | Known | NO  | NO  | NO  | YES |
| SPBC3B9.16c   | SPAC15F9.02   | 0.9999888 | Known | YES | YES | YES | YES |
| SPCC1259.13   | SPAC20G8.01   | 0.9999888 | Known | NO  | YES | NO  | YES |
| SPBC16H5.11c  | SPAC1F5.09c   | 0.9999888 | Known | NO  | YES | NO  | YES |
| SPAC24H6.05   | SPBC725.16    | 0.9999888 | Known | NO  | NO  | NO  | YES |
| SPAC24H6.05   | SPCC1795.11   | 0.9999888 | Known | YES | YES | YES | YES |
| SPAC17D4.02   | SPBC1347.10   | 0.9999887 | Known | YES | YES | YES | YES |
| SPBC685.09    | SPBC29A10.15  | 0.9999887 | Known | YES | YES | YES | YES |
| SPAC57A10.02  | SPAC821.08c   | 0.9999887 | Known | NO  | YES | NO  | YES |
| SPAC57A7.04c  | SPAC821.04c   | 0.9999887 | Known | YES | NO  | NO  | NO  |
| SPBC660.07    | SPAC328.03    | 0.9999887 | Known | NO  | YES | YES | YES |
| SPCC1259.13   | SPBC25D12.03c | 0.9999887 | Known | NO  | YES | NO  | YES |
| SPAC1D4.11c   | SPBC530.14c   | 0.9999887 | Known | NO  | YES | YES | NO  |
| SPAC1687.18c  | SPAC6F12.15c  | 0.9999886 | Known | NO  | YES | NO  | YES |
| SPAC664.07c   | SPBC1921.05   | 0.9999886 | Known | NO  | NO  | NO  | YES |
| SPCC18B5.11c  | SPAPB1E7.02c  | 0.9999886 | Known | NO  | YES | NO  | YES |
| SPBC649.05    | SPAC23C11.16  | 0.9999886 | Known | YES | YES | YES | YES |
| SPAC4F10.15c  | SPBC17F3.02   | 0.9999886 | Known | YES | YES | YES | YES |
| SPAC144.13c   | SPAC6F12.15c  | 0.9999886 | Known | NO  | NO  | YES | YES |
| SPBC1718.01   | SPBC582.03    | 0.9999886 | Known | NO  | YES | YES | YES |
| SPCC126.02c   | SPAC9E9.08    | 0.9999886 | Known | NO  | NO  | NO  | YES |
| SPBC582.03    | SPAC57A10.02  | 0.9999886 | Known | NO  | YES | YES | YES |
| SPAC17C9.13c  | SPBC106.09    | 0.9999886 | Known | NO  | NO  | YES | YES |
| SPBC17D11.05  | SPAC1751.03   | 0.9999886 | Known | YES | YES | YES | YES |
| SPAPB2B4.03   | SPCC16A11.17  | 0.9999886 | Known | NO  | NO  | NO  | YES |
| SPAC24B11.06c | SPAC1805.17   | 0.9999886 | Known | NO  | NO  | YES | YES |
| SPBC36.09     | SPAC644.12    | 0.9999885 | Known | YES | NO  | YES | YES |
| SPBC4.04c     | SPBC800.05c   | 0.9999885 | Known | NO  | NO  | NO  | NO  |
| SPAC18B11.10  | SPBC409.07c   | 0.9999885 | Known | NO  | YES | NO  | YES |
| SPAC3C7.11c   | SPAC22A12.15c | 0.9999885 | Known | YES | YES | YES | NO  |
| SPBC19G7.01c  | SPAC3G6.06c   | 0.9999885 | Known | NO  | NO  | NO  | YES |
| SPBC13E7.09   | SPBC146.13c   | 0.9999885 | Known | YES | YES | YES | YES |
| SPCC16C4.07   | SPBC244.01c   | 0.9999885 | Known | YES | NO  | NO  | YES |
| SPAC3A11.14c  | SPBC32F12.04  | 0.9999885 | Known | NO  | NO  | NO  | YES |
| SPAC3H1.01c   | SPBC685.09    | 0.9999885 | Known | YES | YES | YES | YES |
| SPCC5E4.06    | SPCC645.04    | 0.9999885 | Known | YES | YES | YES | YES |
| SPAC22E12.09c | SPCC1795.09   | 0.9999885 | Known | YES | NO  | YES | NO  |
| SPBC582.03    | SPBC336.12c   | 0.9999885 | Known | NO  | YES | NO  | YES |

|               |               |           |       |     |     |     |     |
|---------------|---------------|-----------|-------|-----|-----|-----|-----|
| SPBC1105.04c  | SPBC29A10.15  | 0.9999884 | Known | YES | NO  | YES | YES |
| SPAC29A4.08c  | SPAC644.12    | 0.9999884 | Known | YES | YES | YES | YES |
| SPBC16A3.05c  | SPAC3C7.08c   | 0.9999884 | Known | NO  | NO  | YES | YES |
| SPCC126.02c   | SPAC14C4.13   | 0.9999884 | Known | NO  | YES | NO  | YES |
| SPAC22F3.13   | SPAC19E9.03   | 0.9999884 | Known | NO  | YES | YES | YES |
| SPCC1795.11   | SPBC14C8.07c  | 0.9999884 | Known | NO  | YES | YES | YES |
| SPAC23C11.16  | SPAC1782.09c  | 0.9999884 | Known | YES | YES | YES | YES |
| SPAC4A8.05c   | SPAC926.03    | 0.9999884 | Known | YES | YES | YES | YES |
| SPAC6B12.10c  | SPCC895.07    | 0.9999884 | Known | NO  | NO  | NO  | NO  |
| SPBC543.07    | SPBC12D12.04c | 0.9999883 | Known | YES | YES | YES | YES |
| SPAC144.13c   | SPAC22F3.09c  | 0.9999883 | Known | NO  | NO  | NO  | YES |
| SPAC30D11.10  | SPBC342.05    | 0.9999883 | Known | NO  | YES | NO  | YES |
| SPAC23H3.05c  | SPCC306.04c   | 0.9999883 | Known | YES | NO  | YES | YES |
| SPCC4G3.05c   | SPBC19C7.09c  | 0.9999883 | Known | YES | NO  | NO  | YES |
| SPAC222.10c   | SPCC188.02    | 0.9999883 | Known | NO  | NO  | NO  | YES |
| SPAC12G12.03  | SPAC17A2.09c  | 0.9999883 | Known | YES | YES | YES | YES |
| SPAC22A12.09c | SPAC644.12    | 0.9999883 | Known | YES | NO  | YES | YES |
| SPBC8D2.19    | SPAC3C7.06c   | 0.9999883 | Known | NO  | YES | YES | NO  |
| SPBC4F6.15c   | SPAC688.10    | 0.9999883 | Known | NO  | YES | NO  | NO  |
| SPAC25G10.08  | SPBC646.09c   | 0.9999883 | Known | YES | YES | NO  | YES |
| SPBC32F12.04  | SPBC428.20c   | 0.9999883 | Known | YES | NO  | YES | YES |
| SPBC16C6.10   | SPAC18G6.02c  | 0.9999882 | Known | YES | YES | YES | YES |
| SPBC800.05c   | SPCC895.07    | 0.9999882 | Known | NO  | NO  | YES | YES |
| SPBC26H8.07c  | SPCC895.07    | 0.9999882 | Known | NO  | NO  | YES | NO  |
| SPAC24H6.05   | SPBC409.07c   | 0.9999882 | Known | YES | YES | YES | YES |
| SPCC777.14    | SPAC644.12    | 0.9999882 | Known | NO  | NO  | YES | YES |
| SPAC20G8.05c  | SPAC1006.08   | 0.9999882 | Known | YES | NO  | NO  | YES |
| SPAC18B11.10  | SPAC630.14c   | 0.9999881 | Known | YES | YES | YES | YES |
| SPAC23C11.16  | SPBC1861.02   | 0.9999881 | Known | NO  | YES | NO  | NO  |
| SPBC1A4.05    | SPBC12D12.01  | 0.9999881 | Known | NO  | NO  | NO  | NO  |
| SPAC3A11.08   | SPAC17H9.19c  | 0.9999881 | Known | YES | NO  | YES | YES |
| SPAC3A11.08   | SPBC428.08c   | 0.9999881 | Known | YES | NO  | YES | YES |
| SPCC18B5.03   | SPAPB2B4.03   | 0.9999881 | Known | NO  | YES | YES | YES |
| SPBC216.05    | SPBC409.05    | 0.9999881 | Known | NO  | YES | NO  | YES |
| SPBC800.03    | SPBC1105.04c  | 0.9999881 | Known | YES | NO  | YES | YES |
| SPAC977.10    | SPAC11G7.02   | 0.9999881 | Known | NO  | NO  | NO  | YES |
| SPBC29A10.15  | SPBC776.12c   | 0.9999881 | Known | NO  | YES | YES | YES |
| SPAC23C11.15  | SPAC23H4.12   | 0.9999881 | Known | YES | YES | YES | YES |
| SPBC13G1.13   | SPAC17A5.06   | 0.9999881 | Known | YES | YES | YES | NO  |
| SPAC24H6.12c  | SPCC895.07    | 0.9999881 | Known | NO  | YES | NO  | NO  |
| SPBC336.15    | SPCC320.13c   | 0.9999881 | Known | YES | YES | YES | NO  |
| SPCC18B5.03   | SPBC1718.07c  | 0.9999881 | Known | NO  | YES | NO  | NO  |
| SPBP22H7.07   | SPAC644.12    | 0.9999881 | Known | YES | YES | YES | YES |
| SPCC18B5.03   | SPAC29A4.02c  | 0.9999881 | Known | NO  | NO  | NO  | YES |
| SPAPB2B4.03   | SPBC16A3.11   | 0.999988  | Known | NO  | YES | NO  | YES |
| SPBC211.06    | SPAC806.08c   | 0.999988  | Known | YES | NO  | YES | YES |
| SPAC1B9.02c   | SPBC106.10    | 0.999988  | Known | NO  | YES | YES | YES |



|               |               |           |       |     |     |     |     |
|---------------|---------------|-----------|-------|-----|-----|-----|-----|
| SPAC9E9.08    | SPAC821.04c   | 0.999988  | Known | NO  | NO  | YES | YES |
| SPBC409.07c   | SPAC630.14c   | 0.999988  | Known | YES | YES | NO  | YES |
| SPAC1782.09c  | SPBC244.01c   | 0.999988  | Known | YES | YES | YES | YES |
| SPCC338.16    | SPAC9E9.08    | 0.999988  | Known | NO  | NO  | NO  | YES |
| SPAC22E12.07  | SPAC25A8.01c  | 0.9999879 | Known | NO  | NO  | NO  | NO  |
| SPAC24H6.05   | SPAC644.06c   | 0.9999879 | Known | YES | NO  | NO  | YES |
| SPBC557.03c   | SPAC1952.13   | 0.9999879 | Known | NO  | NO  | NO  | YES |
| SPAC6G10.12c  | SPBC4C3.12    | 0.9999879 | Known | NO  | YES | YES | YES |
| SPAC23G3.01   | SPCC1442.10c  | 0.9999879 | Known | YES | YES | YES | YES |
| SPBC28F2.12   | SPAC23C4.15   | 0.9999879 | Known | NO  | YES | YES | YES |
| SPAC22H10.07  | SPBC1604.14c  | 0.9999879 | Known | YES | YES | YES | YES |
| SPAC24H6.09   | SPAC821.12    | 0.9999879 | Known | NO  | YES | YES | YES |
| SPCC18B5.11c  | SPAC20G8.01   | 0.9999879 | Known | NO  | YES | NO  | YES |
| SPAC6B12.10c  | SPBC342.05    | 0.9999879 | Known | YES | NO  | YES | YES |
| SPCC338.17c   | SPBC29A10.14  | 0.9999879 | Known | NO  | YES | NO  | YES |
| SPAC27D7.03c  | SPBC19C2.05   | 0.9999879 | Known | YES | YES | NO  | YES |
| SPAP27G11.15  | SPAC2G11.12   | 0.9999879 | Known | NO  | YES | YES | YES |
| SPAC1687.18c  | SPCC338.17c   | 0.9999878 | Known | YES | YES | YES | YES |
| SPBC409.07c   | SPCC1322.08   | 0.9999878 | Known | YES | YES | YES | YES |
| SPAC821.04c   | SPAC14C4.13   | 0.9999878 | Known | NO  | YES | YES | YES |
| SPCC1259.13   | SPBC29A10.15  | 0.9999878 | Known | NO  | YES | NO  | YES |
| SPCC338.16    | SPAC14C4.13   | 0.9999878 | Known | NO  | NO  | NO  | YES |
| SPBC16H5.05c  | SPAC644.12    | 0.9999878 | Known | YES | NO  | YES | NO  |
| SPCC18B5.11c  | SPBC25D12.03c | 0.9999878 | Known | NO  | YES | NO  | YES |
| SPBC1685.15c  | SPBC32F12.04  | 0.9999878 | Known | YES | NO  | NO  | YES |
| SPBC32F12.04  | SPBC365.15    | 0.9999878 | Known | YES | NO  | YES | YES |
| SPAC18B11.10  | SPBC29B5.01   | 0.9999877 | Known | YES | YES | NO  | YES |
| SPBC354.03    | SPCC306.04c   | 0.9999877 | Known | YES | NO  | YES | YES |
| SPCC663.12    | SPCC1322.12c  | 0.9999877 | Known | NO  | YES | YES | NO  |
| SPAC1565.08   | SPAC2C4.15c   | 0.9999877 | Known | YES | YES | YES | NO  |
| SPAC16A10.06c | SPAC2G11.12   | 0.9999877 | Known | NO  | YES | YES | YES |
| SPBC19C2.01   | SPAC23C11.11  | 0.9999877 | Known | NO  | YES | NO  | NO  |
| SPAC18B11.10  | SPAC23E2.01   | 0.9999877 | Known | NO  | YES | NO  | NO  |
| SPAC19D5.06c  | SPAC26A3.12c  | 0.9999876 | Known | NO  | NO  | YES | NO  |
| SPAC24H6.05   | SPCC1322.08   | 0.9999876 | Known | YES | YES | NO  | YES |
| SPAC14C4.02c  | SPCC645.04    | 0.9999876 | Known | YES | YES | YES | YES |
| SPBC409.04c   | SPCC1020.02   | 0.9999876 | Known | YES | YES | YES | YES |
| SPBC660.14    | SPAC644.06c   | 0.9999876 | Known | NO  | YES | YES | YES |
| SPAC637.10c   | SPBC106.09    | 0.9999876 | Known | NO  | NO  | NO  | YES |
| SPAC24H6.05   | SPCC338.16    | 0.9999876 | Known | NO  | YES | NO  | YES |
| SPAC9G1.05    | SPAC821.04c   | 0.9999876 | Known | YES | NO  | NO  | NO  |
| SPAC24H6.05   | SPBC14C8.07c  | 0.9999876 | Known | NO  | NO  | YES | YES |
| SPCC188.02    | SPAC6F12.12   | 0.9999876 | Known | YES | YES | YES | YES |
| SPAC6F12.15c  | SPBC106.10    | 0.9999876 | Known | NO  | YES | NO  | YES |
| SPAC22F3.13   | SPCC364.02c   | 0.9999876 | Known | NO  | NO  | NO  | NO  |
| SPBC336.12c   | SPBC26H8.07c  | 0.9999875 | Known | NO  | NO  | NO  | NO  |
| SPAC13G6.01c  | SPAC4C5.04    | 0.9999875 | Known | NO  | NO  | YES | YES |

|               |               |           |       |     |     |     |     |
|---------------|---------------|-----------|-------|-----|-----|-----|-----|
| SPAC17C9.13c  | SPCC1450.11c  | 0.9999875 | Known | NO  | NO  | NO  | NO  |
| SPAC227.16c   | SPBC25H2.13c  | 0.9999875 | Known | NO  | NO  | YES | NO  |
| SPBC342.05    | SPCC4B3.12    | 0.9999875 | Known | YES | NO  | YES | YES |
| SPAC140.02    | SPAC12G12.13c | 0.9999875 | Known | YES | YES | YES | NO  |
| SPCC18B5.11c  | SPCC306.03c   | 0.9999875 | Known | NO  | NO  | NO  | NO  |
| SPAC24B11.11c | SPCC16C4.07   | 0.9999875 | Known | NO  | NO  | NO  | YES |
| SPAC30D11.10  | SPAC1687.05   | 0.9999875 | Known | NO  | NO  | NO  | YES |
| SPBC211.04c   | SPCC364.02c   | 0.9999875 | Known | NO  | NO  | NO  | NO  |
| SPAC24B11.11c | SPBP4H10.04   | 0.9999874 | Known | NO  | NO  | YES | YES |
| SPBC336.12c   | SPBC428.18    | 0.9999874 | Known | NO  | NO  | NO  | NO  |
| SPAC17C9.13c  | SPAC2G11.12   | 0.9999874 | Known | NO  | NO  | YES | YES |
| SPAPB2B4.03   | SPBC4.04c     | 0.9999874 | Known | NO  | NO  | NO  | YES |
| SPBC12D12.01  | SPBC244.01c   | 0.9999874 | Known | YES | YES | NO  | YES |
| SPAC23G3.01   | SPCC1672.08c  | 0.9999874 | Known | NO  | YES | NO  | YES |
| SPAC664.01c   | SPCC1322.12c  | 0.9999874 | Known | NO  | YES | YES | YES |
| SPAC24H6.06   | SPBC776.12c   | 0.9999874 | Known | NO  | YES | YES | YES |
| SPBC582.05c   | SPBC1734.06   | 0.9999874 | Known | NO  | NO  | NO  | YES |
| SPBC32F12.04  | SPCC4G3.19    | 0.9999873 | Known | YES | NO  | NO  | YES |
| SPCC1739.03   | SPCC663.12    | 0.9999873 | Known | YES | YES | YES | YES |
| SPCC338.17c   | SPAC1782.09c  | 0.9999873 | Known | NO  | YES | YES | NO  |
| SPCC576.15c   | SPCC24B10.07  | 0.9999873 | Known | NO  | YES | YES | NO  |
| SPBC20F10.04c | SPCC5E4.06    | 0.9999873 | Known | YES | YES | YES | YES |
| SPBC800.03    | SPBC428.08c   | 0.9999873 | Known | YES | NO  | YES | YES |
| SPBC3E7.08c   | SPAC4C5.04    | 0.9999873 | Known | NO  | NO  | NO  | YES |
| SPBC3E7.08c   | SPAC1D4.06c   | 0.9999873 | Known | NO  | NO  | NO  | YES |
| SPBC660.14    | SPCC338.16    | 0.9999872 | Known | NO  | NO  | NO  | YES |
| SPAC343.09    | SPAC1565.08   | 0.9999872 | Known | NO  | YES | YES | NO  |
| SPAC17D4.02   | SPBC1105.04c  | 0.9999872 | Known | YES | YES | YES | YES |
| SPAC24B11.11c | SPCC188.02    | 0.9999871 | Known | NO  | NO  | NO  | YES |
| SPAC630.14c   | SPBC29B5.01   | 0.9999871 | Known | YES | YES | NO  | YES |
| SPBC23E6.07c  | SPBC83.14c    | 0.9999871 | Known | YES | YES | YES | YES |
| SPCC584.04    | SPAC8F11.07c  | 0.9999871 | Known | NO  | NO  | NO  | YES |
| SPCC18B5.11c  | SPAC1B2.05    | 0.9999871 | Known | NO  | YES | NO  | YES |
| SPAC22E12.14c | SPBC106.10    | 0.9999871 | Known | NO  | YES | YES | YES |
| SPAC22E12.09c | SPAC4A8.04    | 0.9999871 | Known | YES | NO  | NO  | NO  |
| SPAC24H6.03   | SPBC215.03c   | 0.999987  | Known | NO  | NO  | NO  | YES |
| SPAC23H3.08c  | SPCC1322.12c  | 0.999987  | Known | YES | YES | YES | YES |
| SPBC3E7.08c   | SPBC14C8.01c  | 0.999987  | Known | NO  | NO  | NO  | YES |
| SPAC13D6.01   | SPAC17G6.12   | 0.999987  | Known | YES | NO  | YES | YES |
| SPBC649.05    | SPAC1786.03   | 0.999987  | Known | YES | NO  | YES | NO  |
| SPBP35G2.03c  | SPCC1322.12c  | 0.999987  | Known | YES | NO  | YES | NO  |
| SPBC3E7.08c   | SPBC20F10.04c | 0.999987  | Known | NO  | NO  | NO  | YES |
| SPAC24H6.03   | SPBC17D11.01  | 0.999987  | Known | NO  | NO  | NO  | YES |
| SPCC1259.13   | SPAC16A10.07c | 0.999987  | Known | NO  | YES | YES | YES |
| SPBC776.12c   | SPAC23C4.18c  | 0.999987  | Known | NO  | YES | YES | YES |
| SPAC926.04c   | SPBC9B6.10    | 0.9999869 | Known | YES | NO  | YES | YES |
| SPAC24H6.05   | SPAC26F1.10c  | 0.9999869 | Known | NO  | YES | YES | YES |

|               |               |           |       |     |     |     |     |
|---------------|---------------|-----------|-------|-----|-----|-----|-----|
| SPBC19G7.05c  | SPAC1565.06c  | 0.9999869 | Known | NO  | NO  | NO  | YES |
| SPAC6F12.15c  | SPAC821.08c   | 0.9999869 | Known | NO  | YES | NO  | YES |
| SPAC24H6.05   | SPBC649.05    | 0.9999869 | Known | NO  | YES | NO  | YES |
| SPBC947.11c   | SPBC83.14c    | 0.9999869 | Known | YES | YES | YES | YES |
| SPAC24B11.11c | SPAC1782.09c  | 0.9999869 | Known | YES | YES | NO  | YES |
| SPAC12G12.03  | SPBC29B5.01   | 0.9999869 | Known | NO  | YES | NO  | YES |
| SPBC18H10.06c | SPCC306.04c   | 0.9999869 | Known | YES | NO  | YES | YES |
| SPCC1739.14   | SPBC16A3.05c  | 0.9999869 | Known | YES | NO  | NO  | YES |
| SPBC2D10.12   | SPBP19A11.03c | 0.9999869 | Known | NO  | NO  | YES | YES |
| SPAC30D11.10  | SPBC543.03c   | 0.9999869 | Known | NO  | NO  | NO  | YES |
| SPBC649.05    | SPAC644.06c   | 0.9999868 | Known | YES | NO  | NO  | YES |
| SPCC18B5.11c  | SPBC29A10.15  | 0.9999868 | Known | NO  | YES | YES | YES |
| SPBC2F12.13   | SPAC17H9.17c  | 0.9999868 | Known | NO  | NO  | NO  | NO  |
| SPCC1739.13   | SPBC646.09c   | 0.9999868 | Known | NO  | NO  | NO  | NO  |
| SPCC1753.02c  | SPAC1B9.02c   | 0.9999868 | Known | NO  | NO  | NO  | NO  |
| SPAC24B11.11c | SPAC6G10.12c  | 0.9999868 | Known | NO  | NO  | NO  | YES |
| SPAC17D4.02   | SPBC776.12c   | 0.9999868 | Known | NO  | YES | YES | YES |
| SPAP8A3.09c   | SPCC188.02    | 0.9999868 | Known | YES | NO  | NO  | YES |
| SPBC582.03    | SPAC6F12.15c  | 0.9999868 | Known | NO  | YES | NO  | YES |
| SPBC660.14    | SPAC144.13c   | 0.9999868 | Known | NO  | NO  | NO  | YES |
| SPBC23E6.07c  | SPAC31A2.15c  | 0.9999868 | Known | YES | YES | YES | NO  |
| SPCC550.13    | SPBC1347.10   | 0.9999868 | Known | NO  | YES | YES | YES |
| SPAC13G7.02c  | SPBC646.09c   | 0.9999867 | Novel | NO  | NO  | NO  | NO  |
| SPAC4H3.05    | SPAC644.14c   | 0.9999867 | Known | NO  | YES | NO  | YES |
| SPBC646.14c   | SPBC29A10.15  | 0.9999867 | Known | YES | YES | YES | YES |
| SPCC1259.13   | SPAC23C4.18c  | 0.9999867 | Known | NO  | YES | YES | YES |
| SPBC19C2.05   | SPAC12G12.13c | 0.9999867 | Known | NO  | YES | NO  | NO  |
| SPBC17D11.01  | SPAC17G6.12   | 0.9999867 | Known | NO  | NO  | NO  | NO  |
| SPCC16C4.09   | SPCC1739.12   | 0.9999866 | Known | NO  | NO  | NO  | YES |
| SPAC23A1.06c  | SPAC29A4.16   | 0.9999866 | Known | NO  | YES | YES | YES |
| SPAC4F8.15    | SPAC20G8.03   | 0.9999866 | Known | YES | NO  | NO  | NO  |
| SPBC582.03    | SPAC17C9.01c  | 0.9999866 | Known | NO  | YES | NO  | YES |
| SPAC24H6.05   | SPAC1782.09c  | 0.9999866 | Known | YES | YES | YES | YES |
| SPCC1795.01c  | SPCC1322.12c  | 0.9999866 | Known | YES | YES | YES | YES |
| SPAC22E12.09c | SPAC1006.01   | 0.9999866 | Known | NO  | YES | NO  | NO  |
| SPAC8E11.02c  | SPAPJ698.03c  | 0.9999866 | Known | NO  | NO  | NO  | NO  |
| SPAC2F3.15    | SPAC1782.09c  | 0.9999866 | Known | YES | NO  | YES | YES |
| SPCC338.17c   | SPBC776.12c   | 0.9999865 | Known | NO  | YES | NO  | YES |
| SPBC336.01    | SPAC644.14c   | 0.9999865 | Known | NO  | YES | YES | YES |
| SPBC336.04    | SPBC11B10.09  | 0.9999865 | Known | NO  | YES | NO  | YES |
| SPAC18G6.15   | SPCC1322.12c  | 0.9999865 | Known | NO  | YES | YES | YES |
| SPBC32H8.02c  | SPAC17G6.12   | 0.9999865 | Known | NO  | NO  | NO  | NO  |
| SPBC1718.01   | SPAPB2B4.03   | 0.9999865 | Known | NO  | YES | YES | YES |
| SPCC4G3.05c   | SPAC11E3.08c  | 0.9999865 | Known | NO  | YES | NO  | YES |
| SPBC685.09    | SPBC1347.10   | 0.9999865 | Known | YES | NO  | YES | YES |
| SPAC4A8.05c   | SPAC27F1.02c  | 0.9999865 | Known | YES | YES | YES | YES |
| SPCC1259.13   | SPAC17D4.02   | 0.9999865 | Known | NO  | YES | NO  | YES |

|               |               |           |       |     |     |     |     |
|---------------|---------------|-----------|-------|-----|-----|-----|-----|
| SPBPB8B6.04c  | SPAC821.08c   | 0.9999864 | Known | NO  | NO  | NO  | NO  |
| SPCC188.04c   | SPCC1020.02   | 0.9999864 | Known | YES | YES | YES | YES |
| SPCC1259.13   | SPCC1795.11   | 0.9999864 | Known | YES | YES | NO  | YES |
| SPAC6B12.15   | SPBC12D12.04c | 0.9999864 | Known | NO  | YES | YES | NO  |
| SPAC14C4.02c  | SPBC20F10.04c | 0.9999864 | Known | YES | YES | YES | YES |
| SPAC9.10      | SPAC17A2.01   | 0.9999864 | Known | YES | YES | YES | NO  |
| SPAC3G9.14    | SPAC8C9.03    | 0.9999864 | Known | NO  | NO  | NO  | NO  |
| SPBC26H8.10   | SPBC776.02c   | 0.9999863 | Known | NO  | NO  | YES | NO  |
| SPAC3H1.01c   | SPBC646.14c   | 0.9999863 | Known | YES | YES | YES | YES |
| SPBC3D6.10    | SPBC19C7.09c  | 0.9999863 | Known | NO  | YES | NO  | YES |
| SPBP19A11.03c | SPAC26A3.16   | 0.9999863 | Known | NO  | NO  | YES | YES |
| SPBC21.06c    | SPAC6F6.08c   | 0.9999863 | Known | YES | YES | NO  | YES |
| SPBC19C7.09c  | SPAC11E3.08c  | 0.9999863 | Known | NO  | NO  | NO  | YES |
| SPAC1783.07c  | SPBC29B5.01   | 0.9999863 | Known | NO  | YES | YES | YES |
| SPAC17H9.20   | SPAC664.01c   | 0.9999863 | Known | NO  | NO  | NO  | YES |
| SPBC12D12.01  | SPAC3A11.05c  | 0.9999863 | Known | YES | NO  | NO  | YES |
| SPBC947.11c   | SPAC27E2.10c  | 0.9999863 | Known | YES | YES | YES | NO  |
| SPAC1687.03c  | SPBC947.11c   | 0.9999863 | Known | YES | YES | NO  | NO  |
| SPBC19G7.06   | SPAC23C11.16  | 0.9999863 | Known | NO  | NO  | NO  | NO  |
| SPAC18G6.02c  | SPAC664.01c   | 0.9999862 | Known | YES | YES | YES | YES |
| SPAC4H3.05    | SPAC20H4.07   | 0.9999862 | Known | NO  | YES | NO  | YES |
| SPAC24H6.05   | SPBC887.10    | 0.9999862 | Known | YES | YES | YES | YES |
| SPAC16A10.07c | SPAC30D11.10  | 0.9999862 | Known | NO  | YES | NO  | YES |
| SPAC9G1.09    | SPBC244.01c   | 0.9999862 | Known | YES | YES | YES | YES |
| SPBC947.11c   | SPAC23D3.02   | 0.9999862 | Known | YES | YES | NO  | NO  |
| SPBC365.15    | SPBC902.06    | 0.9999862 | Known | YES | YES | YES | YES |
| SPBC1105.04c  | SPBC1347.10   | 0.9999862 | Known | YES | YES | YES | YES |
| SPAC17A2.09c  | SPBC16A3.18   | 0.9999862 | Known | YES | YES | YES | YES |
| SPBC3D6.04c   | SPBC800.05c   | 0.9999861 | Known | NO  | NO  | NO  | NO  |
| SPAC15A10.03c | SPAC644.14c   | 0.9999861 | Known | NO  | YES | YES | YES |
| SPBC685.09    | SPBC14C8.07c  | 0.9999861 | Known | YES | NO  | YES | YES |
| SPBC336.01    | SPAC20H4.07   | 0.9999861 | Known | NO  | YES | YES | YES |
| SPBC19C2.05   | SPAC22F3.09c  | 0.9999861 | Known | YES | YES | NO  | YES |
| SPAC27D7.13c  | SPAC3C7.12    | 0.9999861 | Known | YES | YES | YES | YES |
| SPBC20F10.06  | SPAC31A2.05c  | 0.9999861 | Known | NO  | YES | NO  | YES |
| SPAC821.12    | SPBC1604.14c  | 0.9999861 | Known | NO  | YES | YES | YES |
| SPBC16G5.12c  | SPCC1259.13   | 0.9999861 | Known | NO  | YES | NO  | YES |
| SPAPB1E7.02c  | SPAC3G6.06c   | 0.9999861 | Known | NO  | YES | YES | YES |
| SPAC4H3.05    | SPAC3C7.03c   | 0.9999861 | Known | NO  | YES | YES | YES |
| SPAC6F6.08c   | SPCC1739.11c  | 0.9999861 | Known | YES | YES | YES | YES |
| SPAC664.01c   | SPCC622.16c   | 0.9999861 | Known | NO  | YES | YES | YES |
| SPAC3A11.08   | SPBC17D11.01  | 0.9999861 | Known | YES | NO  | NO  | NO  |
| SPCC188.02    | SPBC29A10.14  | 0.9999861 | Known | NO  | NO  | NO  | YES |
| SPCC553.09c   | SPBC685.09    | 0.999986  | Known | NO  | NO  | YES | YES |
| SPBC11B10.09  | SPCC1739.11c  | 0.999986  | Known | NO  | YES | NO  | YES |
| SPBC11B10.09  | SPCC1322.12c  | 0.999986  | Known | NO  | YES | YES | YES |
| SPAC821.12    | SPBC17F3.02   | 0.999986  | Known | YES | YES | YES | YES |

|               |              |           |       |     |     |     |     |
|---------------|--------------|-----------|-------|-----|-----|-----|-----|
| SPBC6B1.07    | SPBC1289.11  | 0.999986  | Known | YES | NO  | YES | YES |
| SPAC1834.07   | SPBC28F2.10c | 0.999986  | Known | NO  | NO  | NO  | NO  |
| SPBC409.07c   | SPAC23A1.06c | 0.9999859 | Known | YES | YES | YES | YES |
| SPBC336.01    | SPAC3C7.03c  | 0.9999859 | Known | NO  | YES | YES | YES |
| SPBC1347.10   | SPBC14F5.12c | 0.9999859 | Known | YES | NO  | NO  | YES |
| SPAC16A10.07c | SPCC18B5.11c | 0.9999859 | Known | NO  | YES | NO  | YES |
| SPAC9E9.10c   | SPBC1347.10  | 0.9999859 | Known | YES | YES | NO  | YES |
| SPCC1259.13   | SPAC9E9.08   | 0.9999859 | Known | NO  | NO  | YES | YES |
| SPAC637.07    | SPAC22H10.07 | 0.9999859 | Known | NO  | YES | NO  | YES |
| SPAC24B11.06c | SPCC18B5.03  | 0.9999859 | Known | NO  | YES | NO  | YES |
| SPBC21D10.12  | SPBC17F3.02  | 0.9999859 | Known | YES | YES | YES | YES |
| SPBC146.07    | SPCC962.06c  | 0.9999859 | Known | YES | NO  | YES | NO  |
| SPAP27G11.15  | SPCC5E4.06   | 0.9999858 | Known | NO  | YES | YES | NO  |
| SPBC19G7.06   | SPBC4C3.12   | 0.9999858 | Known | YES | YES | YES | YES |
| SPCC5E4.03c   | SPAC1952.05  | 0.9999858 | Known | YES | NO  | YES | NO  |
| SPAC821.12    | SPBC16H5.11c | 0.9999858 | Known | NO  | YES | YES | YES |
| SPAC24H6.05   | SPBC776.12c  | 0.9999858 | Known | NO  | YES | YES | YES |
| SPAC19G12.01c | SPBC1198.12  | 0.9999858 | Known | NO  | YES | NO  | NO  |
| SPBC211.02c   | SPCC364.02c  | 0.9999858 | Known | NO  | NO  | NO  | NO  |
| SPCC1259.13   | SPCC4G3.05c  | 0.9999858 | Known | NO  | YES | NO  | YES |
| SPBC1105.04c  | SPBC14C8.07c | 0.9999858 | Known | NO  | NO  | YES | YES |
| SPCC5E4.03c   | SPCC16C4.18c | 0.9999857 | Known | YES | YES | YES | NO  |
| SPCC1259.13   | SPCC126.02c  | 0.9999857 | Known | NO  | YES | NO  | YES |
| SPAC31G5.01   | SPBC6B1.07   | 0.9999857 | Known | NO  | NO  | YES | NO  |
| SPAC17H9.19c  | SPAC9E9.08   | 0.9999857 | Known | NO  | NO  | YES | YES |
| SPBC776.12c   | SPBC1347.10  | 0.9999857 | Known | NO  | YES | YES | YES |
| SPAC24H6.05   | SPAC23A1.06c | 0.9999857 | Known | YES | YES | YES | YES |
| SPCC1259.13   | SPAC14C4.13  | 0.9999857 | Known | NO  | YES | YES | YES |
| SPAC19G12.02c | SPAC3G6.06c  | 0.9999857 | Known | NO  | YES | NO  | YES |
| SPBC16G5.12c  | SPBC582.03   | 0.9999857 | Known | NO  | YES | NO  | YES |
| SPAC1783.07c  | SPCC962.03c  | 0.9999857 | Known | YES | NO  | NO  | YES |
| SPBC19C2.05   | SPBC725.16   | 0.9999857 | Known | NO  | NO  | NO  | YES |
| SPAPB1E7.06c  | SPBC1921.02  | 0.9999856 | Known | NO  | NO  | YES | YES |
| SPAC16A10.06c | SPCC5E4.06   | 0.9999856 | Known | YES | YES | YES | YES |
| SPCC18B5.11c  | SPAC23C4.18c | 0.9999856 | Known | NO  | YES | YES | YES |
| SPBC887.14c   | SPBC1734.02c | 0.9999856 | Known | NO  | NO  | YES | YES |
| SPAC1783.07c  | SPBC1604.08c | 0.9999856 | Known | NO  | NO  | NO  | YES |
| SPCC1739.12   | SPAC17G8.14c | 0.9999856 | Known | NO  | YES | YES | YES |
| SPBC1347.10   | SPAC8F11.07c | 0.9999855 | Known | YES | YES | NO  | YES |
| SPAC17H9.19c  | SPAC14C4.13  | 0.9999855 | Known | NO  | NO  | YES | YES |
| SPAC17H9.03c  | SPAC2G11.12  | 0.9999855 | Known | NO  | YES | YES | YES |
| SPAC15A10.03c | SPAC3C7.03c  | 0.9999855 | Known | NO  | YES | YES | YES |
| SPAC644.04    | SPAC23C4.19  | 0.9999855 | Known | NO  | YES | NO  | YES |
| SPBC21.01     | SPAC1687.20c | 0.9999855 | Known | YES | YES | YES | YES |
| SPAC27F1.04c  | SPAC1687.20c | 0.9999855 | Known | NO  | YES | NO  | YES |
| SPAPB1E7.02c  | SPAC644.14c  | 0.9999855 | Known | NO  | YES | YES | YES |
| SPAC24H6.05   | SPCC1259.13  | 0.9999855 | Known | YES | YES | YES | YES |

|               |               |           |       |     |     |     |     |
|---------------|---------------|-----------|-------|-----|-----|-----|-----|
| SPAC19G12.01c | SPAC8C9.03    | 0.9999855 | Known | NO  | NO  | NO  | NO  |
| SPBC3E7.08c   | SPAC8E11.02c  | 0.9999854 | Known | NO  | NO  | NO  | YES |
| SPAC24H6.03   | SPAC22A12.03c | 0.9999854 | Known | NO  | NO  | NO  | NO  |
| SPAC644.14c   | SPAC22F3.03c  | 0.9999854 | Known | NO  | YES | YES | YES |
| SPAC3G6.06c   | SPBC342.05    | 0.9999854 | Known | NO  | YES | YES | YES |
| SPAC1952.07   | SPCC306.04c   | 0.9999854 | Known | NO  | NO  | YES | YES |
| SPCC338.17c   | SPAC30D11.10  | 0.9999854 | Known | NO  | YES | YES | YES |
| SPCC1259.13   | SPAC644.06c   | 0.9999854 | Known | YES | YES | YES | YES |
| SPAC17D4.02   | SPCC18B5.11c  | 0.9999854 | Known | NO  | YES | NO  | YES |
| SPBC16G5.15c  | SPBC19G7.06   | 0.9999853 | Known | YES | YES | YES | YES |
| SPAC3A12.11c  | SPAC644.12    | 0.9999853 | Known | YES | YES | YES | YES |
| SPBC12C2.02c  | SPBC32F12.09  | 0.9999853 | Known | NO  | NO  | NO  | NO  |
| SPCC962.03c   | SPBC1604.08c  | 0.9999853 | Known | YES | YES | YES | YES |
| SPCC1739.12   | SPBC26H8.10   | 0.9999853 | Known | NO  | YES | YES | NO  |
| SPBC16G5.12c  | SPAC30D11.10  | 0.9999853 | Known | NO  | YES | NO  | YES |
| SPAC22E12.09c | SPCC1259.10   | 0.9999853 | Known | NO  | YES | YES | NO  |
| SPAC24H6.05   | SPAC821.08c   | 0.9999852 | Known | NO  | YES | YES | YES |
| SPAC25G10.08  | SPAC1751.03   | 0.9999852 | Known | YES | YES | YES | YES |
| SPBC800.09    | SPAC23C11.16  | 0.9999852 | Known | YES | YES | NO  | NO  |
| SPCC16C4.18c  | SPBC15D4.14   | 0.9999852 | Known | YES | YES | YES | NO  |
| SPCC645.05c   | SPAC1565.06c  | 0.9999852 | Known | NO  | YES | NO  | YES |
| SPAC4D7.05    | SPBP19A11.03c | 0.9999852 | Known | NO  | YES | NO  | YES |
| SPAC644.06c   | SPAC821.08c   | 0.9999851 | Known | YES | NO  | NO  | YES |
| SPAC3C7.12    | SPBC1604.20c  | 0.9999851 | Known | YES | YES | YES | YES |
| SPAC1687.13c  | SPCC1494.05c  | 0.9999851 | Known | NO  | NO  | NO  | YES |
| SPAC13G7.08c  | SPAC23C4.18c  | 0.9999851 | Known | NO  | NO  | NO  | YES |
| SPAC23C4.08   | SPCC895.05    | 0.9999851 | Known | NO  | YES | YES | NO  |
| SPAC17G6.16c  | SPBC3B9.11c   | 0.9999851 | Known | YES | NO  | YES | YES |
| SPBC342.05    | SPBC1734.02c  | 0.9999851 | Known | NO  | YES | YES | YES |
| SPCC825.03c   | SPAC607.10    | 0.999985  | Known | YES | NO  | YES | NO  |
| SPBC3B9.02c   | SPAC644.12    | 0.999985  | Known | YES | NO  | YES | NO  |
| SPAC25G10.04c | SPAC644.14c   | 0.999985  | Known | YES | NO  | YES | NO  |
| SPBC336.12c   | SPBC32H8.12c  | 0.999985  | Known | NO  | NO  | NO  | YES |
| SPCC1259.13   | SPCC338.16    | 0.999985  | Known | NO  | YES | NO  | YES |
| SPAC1834.01   | SPCC584.04    | 0.999985  | Known | YES | NO  | YES | NO  |
| SPAC24B11.11c | SPAC9G1.09    | 0.999985  | Known | YES | YES | YES | YES |
| SPBC582.03    | SPAC644.06c   | 0.999985  | Known | NO  | NO  | NO  | YES |
| SPBC365.05c   | SPAC644.12    | 0.9999849 | Known | YES | NO  | NO  | NO  |
| SPCC1753.02c  | SPAC1A6.04c   | 0.9999849 | Known | NO  | NO  | NO  | YES |
| SPBC582.05c   | SPCC645.04    | 0.9999849 | Known | NO  | NO  | NO  | YES |
| SPBC660.13c   | SPAC30D11.10  | 0.9999849 | Known | NO  | YES | YES | YES |
| SPAC1952.07   | SPCC970.01    | 0.9999849 | Known | NO  | NO  | NO  | NO  |
| SPCC4G3.05c   | SPAC30D11.10  | 0.9999849 | Known | NO  | YES | YES | YES |
| SPACUNK4.06c  | SPBC28F2.12   | 0.9999849 | Known | NO  | YES | YES | YES |
| SPBC1289.03c  | SPCC1020.02   | 0.9999849 | Known | NO  | YES | NO  | YES |
| SPBC106.09    | SPBC20F10.06  | 0.9999849 | Known | NO  | NO  | NO  | YES |
| SPBC409.07c   | SPBC19C2.05   | 0.9999849 | Known | YES | YES | YES | NO  |

|               |               |           |       |     |     |     |     |
|---------------|---------------|-----------|-------|-----|-----|-----|-----|
| SPCC18B5.03   | SPBC25B2.05   | 0.9999849 | Known | NO  | NO  | NO  | YES |
| SPAC637.07    | SPBC646.09c   | 0.9999849 | Known | YES | YES | YES | YES |
| SPAC27E2.05   | SPAC9E9.08    | 0.9999848 | Known | NO  | NO  | NO  | YES |
| SPBC3E7.08c   | SPBC16D10.09  | 0.9999848 | Known | NO  | YES | NO  | YES |
| SPBC342.05    | SPAC644.14c   | 0.9999848 | Known | YES | YES | YES | YES |
| SPCC18B5.11c  | SPAC9E9.08    | 0.9999848 | Known | NO  | NO  | YES | YES |
| SPAC1952.07   | SPBC1921.05   | 0.9999848 | Known | NO  | NO  | NO  | YES |
| SPAC12G12.03  | SPBC16A3.18   | 0.9999848 | Known | YES | YES | YES | YES |
| SPAC16A10.07c | SPAC664.07c   | 0.9999847 | Known | NO  | YES | YES | YES |
| SPBC409.07c   | SPBC9B6.10    | 0.9999847 | Known | YES | YES | YES | YES |
| SPBC17D11.06  | SPAC9E9.08    | 0.9999847 | Known | NO  | NO  | NO  | YES |
| SPBC16E9.14c  | SPAC17D4.03c  | 0.9999847 | Known | YES | YES | YES | NO  |
| SPBC530.14c   | SPBC146.07    | 0.9999847 | Known | NO  | NO  | NO  | NO  |
| SPCC18B5.03   | SPAC1952.07   | 0.9999847 | Known | NO  | YES | YES | YES |
| SPAC27E2.05   | SPAC14C4.13   | 0.9999846 | Known | NO  | NO  | NO  | YES |
| SPAC8E11.02c  | SPBC19C2.01   | 0.9999846 | Known | NO  | NO  | NO  | NO  |
| SPCC18B5.03   | SPBC16H5.07c  | 0.9999846 | Known | NO  | NO  | YES | YES |
| SPCC4G3.05c   | SPCC18B5.11c  | 0.9999846 | Known | NO  | YES | YES | YES |
| SPAC16A10.06c | SPAC14C4.02c  | 0.9999846 | Known | YES | YES | YES | YES |
| SPAC9G1.09    | SPAC2F3.15    | 0.9999846 | Known | NO  | YES | NO  | YES |
| SPCC126.02c   | SPCC18B5.11c  | 0.9999846 | Known | NO  | YES | NO  | YES |
| SPBC6B1.07    | SPCC1281.02c  | 0.9999846 | Known | NO  | NO  | YES | NO  |
| SPAC27F1.02c  | SPAC1F5.04c   | 0.9999845 | Known | YES | YES | YES | YES |
| SPBC582.03    | SPBC14C8.07c  | 0.9999845 | Known | NO  | NO  | NO  | YES |
| SPCC364.02c   | SPAC1687.05   | 0.9999845 | Known | NO  | NO  | NO  | NO  |
| SPBC17D11.06  | SPAC14C4.13   | 0.9999845 | Known | YES | NO  | NO  | YES |
| SPBC800.03    | SPBC36.05c    | 0.9999845 | Known | YES | YES | YES | YES |
| SPBC16A3.18   | SPBC29B5.01   | 0.9999845 | Known | NO  | YES | NO  | YES |
| SPAC1783.07c  | SPBC646.09c   | 0.9999844 | Known | YES | NO  | YES | NO  |
| SPAC688.02c   | SPCC1020.02   | 0.9999844 | Known | YES | YES | YES | YES |
| SPCC550.13    | SPBC776.12c   | 0.9999844 | Known | YES | YES | YES | YES |
| SPBC342.05    | SPBC18H10.06c | 0.9999844 | Known | YES | NO  | NO  | YES |
| SPBC13G1.08c  | SPCC594.05c   | 0.9999844 | Known | YES | YES | YES | YES |
| SPAC13C5.07   | SPAC664.07c   | 0.9999844 | Known | NO  | YES | YES | YES |
| SPAC8E11.02c  | SPCC11E10.08  | 0.9999844 | Known | NO  | NO  | YES | YES |
| SPAC664.07c   | SPAC23C4.18c  | 0.9999844 | Known | NO  | YES | YES | YES |
| SPCC1259.13   | SPAC144.13c   | 0.9999844 | Known | NO  | NO  | NO  | YES |
| SPAC27F1.04c  | SPBC11C11.03  | 0.9999843 | Known | YES | YES | YES | YES |
| SPAC1687.20c  | SPBP22H7.09c  | 0.9999843 | Known | YES | YES | YES | YES |
| SPBC3E7.08c   | SPBC4F6.15c   | 0.9999843 | Known | NO  | YES | NO  | YES |
| SPAC24H6.05   | SPCC18B5.11c  | 0.9999843 | Known | NO  | YES | YES | YES |
| SPAC6F6.08c   | SPAC20G8.05c  | 0.9999843 | Known | NO  | YES | NO  | YES |
| SPAC4A8.05c   | SPAP8A3.08    | 0.9999843 | Known | YES | YES | YES | YES |
| SPBC1709.01   | SPAC6F6.08c   | 0.9999843 | Known | NO  | YES | YES | YES |
| SPAC18G6.07c  | SPBC646.12c   | 0.9999843 | Known | NO  | NO  | NO  | YES |
| SPAC17H9.19c  | SPBC25H2.12c  | 0.9999842 | Known | NO  | NO  | NO  | NO  |
| SPBC12D12.03  | SPAC17H9.19c  | 0.9999842 | Known | NO  | NO  | NO  | NO  |

|               |               |           |       |     |     |     |     |
|---------------|---------------|-----------|-------|-----|-----|-----|-----|
| SPAC31G5.13   | SPBP19A11.03c | 0.9999841 | Known | YES | YES | YES | YES |
| SPBC12D12.06  | SPAC589.02c   | 0.9999841 | Known | YES | NO  | YES | YES |
| SPAC144.13c   | SPAC821.08c   | 0.9999841 | Known | NO  | NO  | YES | YES |
| SPAC227.16c   | SPBC19G7.05c  | 0.9999841 | Known | NO  | NO  | NO  | YES |
| SPAC4F10.10c  | SPCC895.07    | 0.9999841 | Known | NO  | NO  | NO  | NO  |
| SPAC1B1.01    | SPBC29B5.01   | 0.9999841 | Known | YES | YES | YES | YES |
| SPBC1718.07c  | SPBC244.01c   | 0.999984  | Known | NO  | YES | NO  | YES |
| SPBC21B10.05c | SPAC458.03    | 0.999984  | Known | YES | YES | YES | YES |
| SPBC1709.15c  | SPAC824.04    | 0.999984  | Known | YES | NO  | YES | YES |
| SPBC1718.07c  | SPBC1D7.05    | 0.999984  | Known | NO  | YES | NO  | YES |
| SPBC646.14c   | SPBC1347.10   | 0.999984  | Known | YES | NO  | YES | YES |
| SPAPB2B4.03   | SPAC22F3.09c  | 0.999984  | Known | NO  | YES | YES | YES |
| SPAC17G6.16c  | SPAC22G7.10   | 0.999984  | Known | YES | NO  | YES | YES |
| SPAC16A10.07c | SPAC17G8.13c  | 0.999984  | Known | NO  | NO  | YES | NO  |
| SPBC26H8.07c  | SPAC1786.03   | 0.999984  | Known | NO  | NO  | NO  | NO  |
| SPAC110.03    | SPCC895.05    | 0.999984  | Known | NO  | YES | NO  | NO  |
| SPAC4H3.05    | SPAC1D4.06c   | 0.9999839 | Known | NO  | YES | NO  | YES |
| SPBC1105.04c  | SPAC9E9.10c   | 0.9999839 | Known | YES | YES | YES | YES |
| SPBC1105.04c  | SPBC14F5.12c  | 0.9999839 | Known | YES | YES | YES | YES |
| SPCC18B5.03   | SPAC823.15    | 0.9999839 | Novel | NO  | NO  | NO  | NO  |
| SPBC11B10.06  | SPAC2G11.12   | 0.9999839 | Known | NO  | YES | YES | YES |
| SPBC2F12.13   | SPBC27.02c    | 0.9999839 | Known | YES | NO  | NO  | YES |
| SPBC582.03    | SPAC144.13c   | 0.9999839 | Known | NO  | NO  | NO  | YES |
| SPCC645.05c   | SPAC926.03    | 0.9999839 | Known | YES | YES | YES | YES |
| SPBC24C6.06   | SPBC1D7.05    | 0.9999839 | Known | NO  | NO  | NO  | YES |
| SPAC4F10.15c  | SPBC21D10.12  | 0.9999839 | Known | NO  | YES | YES | YES |
| SPAC23E2.03c  | SPBC19C2.05   | 0.9999839 | Known | YES | YES | NO  | YES |
| SPAC8E11.03c  | SPAC22F3.03c  | 0.9999839 | Known | NO  | YES | YES | YES |
| SPCC550.02c   | SPAC644.12    | 0.9999838 | Known | YES | NO  | YES | NO  |
| SPCC18B5.03   | SPAC4C5.04    | 0.9999838 | Known | NO  | NO  | NO  | YES |
| SPAC24B11.06c | SPAC11G7.02   | 0.9999838 | Known | YES | NO  | NO  | YES |
| SPBC839.10    | SPCC364.02c   | 0.9999838 | Known | NO  | NO  | NO  | NO  |
| SPCC18B5.11c  | SPAC821.04c   | 0.9999838 | Known | NO  | YES | YES | YES |
| SPAC6F12.11c  | SPBC21H7.05   | 0.9999837 | Known | YES | YES | YES | YES |
| SPCC18B5.11c  | SPCC338.16    | 0.9999837 | Known | NO  | YES | NO  | YES |
| SPAC17G6.16c  | SPAC824.04    | 0.9999837 | Known | YES | NO  | YES | YES |
| SPAC24H6.05   | SPAC14C4.03   | 0.9999837 | Known | NO  | NO  | NO  | NO  |
| SPBC4F6.15c   | SPAC17H9.10c  | 0.9999837 | Known | NO  | YES | NO  | YES |
| SPBC20F10.04c | SPCC970.01    | 0.9999837 | Known | NO  | NO  | NO  | NO  |
| SPAC6G9.08    | SPBC29B5.01   | 0.9999837 | Known | NO  | NO  | NO  | YES |
| SPAC9E9.10c   | SPBC14F5.12c  | 0.9999837 | Known | YES | YES | YES | YES |
| SPBC409.06    | SPBP19A11.03c | 0.9999837 | Known | NO  | NO  | NO  | YES |
| SPCC16C4.07   | SPAC9G1.09    | 0.9999837 | Known | NO  | NO  | NO  | YES |
| SPBC19C2.05   | SPBC29A10.14  | 0.9999836 | Known | NO  | YES | NO  | NO  |
| SPCC553.09c   | SPBC17D11.06  | 0.9999836 | Known | YES | YES | YES | NO  |
| SPAC3G9.14    | SPCC285.09c   | 0.9999836 | Known | NO  | NO  | NO  | NO  |
| SPBC12D12.01  | SPCC417.05c   | 0.9999836 | Known | NO  | NO  | NO  | NO  |



|               |               |           |       |     |     |     |     |
|---------------|---------------|-----------|-------|-----|-----|-----|-----|
| SPAC4H3.05    | SPBC20F10.04c | 0.9999836 | Known | NO  | NO  | NO  | YES |
| SPAC328.03    | SPBC106.10    | 0.9999836 | Known | NO  | YES | NO  | NO  |
| SPAC1142.03c  | SPAC644.14c   | 0.9999836 | Known | YES | YES | YES | YES |
| SPBC646.14c   | SPBC14C8.07c  | 0.9999836 | Known | YES | YES | YES | YES |
| SPBC16C6.06   | SPAC15E1.06   | 0.9999836 | Known | NO  | NO  | NO  | NO  |
| SPBC12D12.01  | SPAC12G12.15  | 0.9999835 | Known | YES | YES | NO  | NO  |
| SPBC646.11    | SPAC17H9.19c  | 0.9999835 | Known | NO  | NO  | NO  | NO  |
| SPBC365.12c   | SPCC364.02c   | 0.9999835 | Known | YES | NO  | YES | NO  |
| SPCC5E4.03c   | SPAC13F5.02c  | 0.9999835 | Known | YES | NO  | YES | NO  |
| SPBC725.16    | SPAC19E9.03   | 0.9999835 | Known | NO  | NO  | YES | YES |
| SPAPB2B4.03   | SPBC725.16    | 0.9999835 | Known | NO  | NO  | YES | YES |
| SPAC1952.07   | SPBC1703.14c  | 0.9999835 | Known | NO  | NO  | NO  | YES |
| SPCC553.09c   | SPAC6B12.10c  | 0.9999834 | Known | YES | NO  | YES | NO  |
| SPBC582.05c   | SPBC20F10.04c | 0.9999834 | Known | NO  | NO  | NO  | YES |
| SPAC20G4.04c  | SPCC306.04c   | 0.9999834 | Known | NO  | NO  | YES | YES |
| SPAC2G11.12   | SPBC20F10.06  | 0.9999834 | Known | NO  | YES | NO  | YES |
| SPBC336.08    | SPCC1020.02   | 0.9999834 | Known | YES | YES | YES | YES |
| SPAC1F7.04    | SPCC645.07    | 0.9999834 | Known | YES | YES | YES | YES |
| SPBC428.03c   | SPAC3C7.11c   | 0.9999834 | Known | YES | NO  | NO  | NO  |
| SPAC3C7.11c   | SPBC21H7.03c  | 0.9999834 | Novel | NO  | NO  | NO  | NO  |
| SPBC18H10.03  | SPBC17D11.05  | 0.9999833 | Known | YES | YES | YES | YES |
| SPCC1259.13   | SPAC11E3.08c  | 0.9999833 | Known | NO  | YES | NO  | YES |
| SPBC13G1.08c  | SPAC23H3.05c  | 0.9999833 | Known | YES | NO  | YES | YES |
| SPAC6B12.08   | SPAC23C11.16  | 0.9999833 | Known | NO  | NO  | NO  | NO  |
| SPCC126.02c   | SPAC664.07c   | 0.9999833 | Known | NO  | NO  | NO  | YES |
| SPAC24B11.11c | SPAC664.07c   | 0.9999833 | Known | NO  | YES | NO  | NO  |
| SPBC106.06    | SPAC17H9.19c  | 0.9999833 | Known | NO  | NO  | NO  | NO  |
| SPAC15A10.03c | SPAC1D4.06c   | 0.9999833 | Known | NO  | YES | NO  | YES |
| SPAC637.07    | SPBC16A3.15c  | 0.9999833 | Known | NO  | NO  | NO  | NO  |
| SPCC550.05    | SPCC5E4.06    | 0.9999833 | Known | YES | YES | YES | YES |
| SPCC18B5.03   | SPBC11B10.09  | 0.9999832 | Known | NO  | YES | YES | YES |
| SPCC18B5.06   | SPCC584.04    | 0.9999832 | Known | NO  | NO  | NO  | YES |
| SPBC32F12.04  | SPBC211.06    | 0.9999832 | Known | YES | NO  | NO  | YES |
| SPAC24B11.11c | SPAC14C4.09   | 0.9999832 | Known | NO  | NO  | NO  | YES |
| SPAC19G12.14  | SPBC609.02    | 0.9999832 | Known | NO  | NO  | YES | NO  |
| SPBC428.18    | SPBC14C8.07c  | 0.9999831 | Known | YES | NO  | YES | NO  |
| SPBC1289.11   | SPAC644.12    | 0.9999831 | Known | YES | NO  | YES | YES |
| SPAC890.02c   | SPBC557.03c   | 0.9999831 | Known | NO  | NO  | YES | NO  |
| SPCC338.17c   | SPAC17G8.13c  | 0.9999831 | Known | NO  | NO  | NO  | YES |
| SPBC24C6.07   | SPAC2F7.03c   | 0.9999831 | Known | NO  | YES | YES | NO  |
| SPAC18B11.10  | SPBC3B8.02    | 0.999983  | Known | NO  | NO  | NO  | YES |
| SPAC17G6.16c  | SPBC776.02c   | 0.999983  | Known | YES | NO  | NO  | YES |
| SPBC776.12c   | SPAC8F11.07c  | 0.999983  | Known | NO  | YES | NO  | YES |
| SPCC970.04c   | SPBC21.06c    | 0.999983  | Known | NO  | YES | YES | YES |
| SPBP4H10.04   | SPAC20G4.07c  | 0.999983  | Known | NO  | NO  | NO  | NO  |
| SPAC13D6.05   | SPBC11C11.04c | 0.9999829 | Known | NO  | YES | YES | YES |
| SPAC644.14c   | SPBC543.03c   | 0.9999829 | Known | NO  | YES | YES | YES |

|               |              |           |       |     |     |     |     |
|---------------|--------------|-----------|-------|-----|-----|-----|-----|
| SPAC18B11.10  | SPAC8C9.03   | 0.9999829 | Known | NO  | NO  | YES | YES |
| SPBC2A9.12    | SPBP23A10.13 | 0.9999829 | Known | YES | YES | YES | YES |
| SPAC13F5.02c  | SPBC15D4.14  | 0.9999828 | Known | YES | NO  | YES | NO  |
| SPCC1259.13   | SPBC776.12c  | 0.9999828 | Known | NO  | YES | YES | YES |
| SPAC637.07    | SPAPB8E5.02c | 0.9999828 | Novel | NO  | YES | NO  | YES |
| SPAC1420.03   | SPAC637.07   | 0.9999828 | Known | NO  | YES | NO  | YES |
| SPAC9G1.09    | SPAC6G10.12c | 0.9999828 | Known | NO  | NO  | NO  | YES |
| SPAC15A10.03c | SPBC11B10.09 | 0.9999827 | Known | NO  | YES | NO  | YES |
| SPBC409.07c   | SPAC2G11.07c | 0.9999827 | Known | NO  | NO  | NO  | YES |
| SPAC20G4.04c  | SPBC1921.05  | 0.9999827 | Known | NO  | NO  | NO  | YES |
| SPBC8D2.10c   | SPAC23A1.10  | 0.9999827 | Novel | NO  | NO  | NO  | NO  |
| SPBC839.15c   | SPBC8D2.10c  | 0.9999827 | Known | NO  | NO  | NO  | NO  |
| SPAC24B11.11c | SPBC16A3.01  | 0.9999827 | Known | NO  | YES | NO  | YES |
| SPCC794.09c   | SPBC8D2.10c  | 0.9999827 | Novel | NO  | NO  | NO  | NO  |
| SPBC16A3.05c  | SPAC1610.03c | 0.9999826 | Known | NO  | NO  | NO  | YES |
| SPCC645.06c   | SPAC1F7.04   | 0.9999826 | Known | NO  | YES | YES | YES |
| SPAC24B11.11c | SPBC1718.07c | 0.9999826 | Known | NO  | YES | NO  | YES |
| SPBC119.08    | SPAC1F5.09c  | 0.9999826 | Known | NO  | YES | YES | YES |
| SPAC19G12.01c | SPCC285.09c  | 0.9999825 | Known | NO  | NO  | NO  | YES |
| SPBC354.03    | SPBC13G1.08c | 0.9999825 | Known | YES | NO  | YES | YES |
| SPBC16H5.11c  | SPCC364.02c  | 0.9999825 | Known | NO  | NO  | NO  | NO  |
| SPAC24B11.06c | SPAC19D5.01  | 0.9999825 | Known | YES | YES | YES | YES |
| SPAC1F7.05    | SPAC4C5.04   | 0.9999825 | Known | NO  | NO  | NO  | YES |
| SPCC4G3.05c   | SPBC1921.02  | 0.9999825 | Known | NO  | YES | YES | YES |
| SPAC1952.07   | SPAC20G8.01  | 0.9999824 | Known | NO  | YES | NO  | YES |
| SPAC23G3.01   | SPAC23C4.15  | 0.9999824 | Known | NO  | YES | YES | YES |
| SPBC2D10.12   | SPAC6F12.15c | 0.9999824 | Known | NO  | NO  | YES | YES |
| SPAC664.07c   | SPAC821.04c  | 0.9999824 | Known | NO  | NO  | YES | YES |
| SPAC13C5.07   | SPAC3G6.06c  | 0.9999824 | Known | NO  | YES | YES | YES |
| SPAC5D6.05    | SPAC589.02c  | 0.9999824 | Known | YES | NO  | YES | YES |
| SPAC24H6.05   | SPAPB2B4.03  | 0.9999823 | Known | NO  | YES | YES | YES |
| SPAC343.05    | SPAC607.09c  | 0.9999823 | Known | NO  | NO  | YES | NO  |
| SPAC17H9.09c  | SPCC1223.06  | 0.9999823 | Known | NO  | NO  | YES | YES |
| SPCC297.03    | SPBC32H8.12c | 0.9999823 | Known | NO  | YES | YES | YES |
| SPBC646.14c   | SPBC685.09   | 0.9999822 | Known | YES | YES | YES | YES |
| SPAC926.04c   | SPCC4F11.02  | 0.9999822 | Known | NO  | NO  | NO  | NO  |
| SPAC630.14c   | SPBC3B8.02   | 0.9999822 | Known | YES | NO  | NO  | YES |
| SPAC1565.08   | SPBC14C8.01c | 0.9999822 | Known | NO  | NO  | NO  | YES |
| SPBC4F6.15c   | SPBC19G7.01c | 0.9999822 | Known | NO  | NO  | YES | YES |
| SPBC3B9.11c   | SPAC22F3.09c | 0.9999821 | Known | NO  | NO  | NO  | NO  |
| SPBC582.03    | SPBC646.09c  | 0.9999821 | Known | NO  | YES | YES | NO  |
| SPCC550.05    | SPAC14C4.02c | 0.9999821 | Known | YES | YES | YES | YES |
| SPBC1105.04c  | SPAC27E2.05  | 0.9999821 | Known | NO  | YES | NO  | YES |
| SPAC630.14c   | SPAC8C9.03   | 0.9999821 | Known | NO  | NO  | NO  | YES |
| SPAP8A3.08    | SPAC1F5.04c  | 0.999982  | Known | YES | YES | YES | YES |
| SPAC17A2.13c  | SPAC22F8.11  | 0.9999819 | Known | NO  | YES | NO  | YES |
| SPAC8E11.02c  | SPAC22F8.11  | 0.9999819 | Known | YES | YES | NO  | YES |

|               |               |           |       |     |     |     |     |
|---------------|---------------|-----------|-------|-----|-----|-----|-----|
| SPBC1685.15c  | SPBC27.02c    | 0.9999818 | Known | YES | NO  | NO  | YES |
| SPBP16F5.07   | SPBP4H10.04   | 0.9999818 | Known | YES | NO  | NO  | NO  |
| SPBC2F12.13   | SPBC28F2.06c  | 0.9999818 | Known | NO  | NO  | NO  | NO  |
| SPBC660.14    | SPAC29A4.02c  | 0.9999818 | Known | NO  | NO  | NO  | YES |
| SPBC428.16c   | SPAC630.13c   | 0.9999818 | Known | NO  | YES | YES | YES |
| SPAPB2B4.03   | SPBC14C8.07c  | 0.9999817 | Known | NO  | NO  | NO  | YES |
| SPAC24B11.11c | SPAC1006.08   | 0.9999817 | Known | NO  | NO  | NO  | YES |
| SPAC589.02c   | SPBC21.04     | 0.9999817 | Known | YES | NO  | NO  | YES |
| SPBP4H10.04   | SPBC119.08    | 0.9999817 | Known | YES | NO  | YES | YES |
| SPAC1142.03c  | SPAC664.01c   | 0.9999816 | Known | NO  | YES | YES | NO  |
| SPBC582.03    | SPAC821.08c   | 0.9999816 | Known | YES | YES | YES | YES |
| SPBC12D12.01  | SPBC947.12    | 0.9999816 | Known | YES | YES | NO  | NO  |
| SPAC1783.03   | SPAC1687.20c  | 0.9999816 | Known | YES | YES | YES | YES |
| SPBC839.17c   | SPBC30D10.10c | 0.9999814 | Known | NO  | NO  | NO  | YES |
| SPAC6F12.02   | SPAC8C9.03    | 0.9999814 | Known | NO  | NO  | NO  | NO  |
| SPBC336.12c   | SPAC4C5.04    | 0.9999814 | Known | NO  | NO  | NO  | YES |
| SPCC18B5.11c  | SPBC776.12c   | 0.9999814 | Known | NO  | YES | YES | YES |
| SPAC3G6.06c   | SPAC9E9.08    | 0.9999814 | Known | NO  | NO  | NO  | YES |
| SPAC22H10.10  | SPBC16A3.15c  | 0.9999814 | Known | NO  | NO  | NO  | YES |
| SPAC24H6.03   | SPAC1687.13c  | 0.9999814 | Known | NO  | NO  | NO  | YES |
| SPBC215.05    | SPBC409.07c   | 0.9999814 | Known | YES | NO  | YES | NO  |
| SPBC6B1.09c   | SPAC3G6.06c   | 0.9999814 | Known | NO  | YES | YES | YES |
| SPAC15A10.08  | SPBC32H8.12c  | 0.9999813 | Known | YES | NO  | YES | YES |
| SPBC342.05    | SPBC14C8.01c  | 0.9999813 | Known | NO  | NO  | YES | YES |
| SPBC13G1.08c  | SPBC18H10.06c | 0.9999813 | Known | YES | NO  | YES | YES |
| SPBC19C7.09c  | SPBC1734.06   | 0.9999813 | Known | NO  | NO  | NO  | YES |
| SPAC24B11.06c | SPAPYUG7.02c  | 0.9999812 | Known | NO  | YES | YES | NO  |
| SPCC1020.04c  | SPBC28F2.12   | 0.9999812 | Known | NO  | YES | YES | YES |
| SPBC582.05c   | SPAC16A10.06c | 0.9999812 | Known | NO  | NO  | NO  | YES |
| SPAC24B11.11c | SPAC9G1.11c   | 0.9999812 | Known | NO  | YES | NO  | YES |
| SPBC30D10.04  | SPAC2G11.12   | 0.9999811 | Known | YES | YES | YES | YES |
| SPAC17C9.13c  | SPBP19A11.03c | 0.9999811 | Known | NO  | NO  | YES | YES |
| SPAC637.10c   | SPBC17D11.07c | 0.9999811 | Known | YES | NO  | YES | YES |
| SPBC32H8.12c  | SPBC1778.06c  | 0.9999811 | Known | YES | NO  | YES | YES |
| SPCC330.10    | SPBC32H8.10   | 0.9999811 | Known | YES | NO  | NO  | NO  |
| SPAC22H10.10  | SPBC800.05c   | 0.9999811 | Known | NO  | NO  | NO  | YES |
| SPCC1259.13   | SPAC27E2.05   | 0.9999811 | Known | NO  | YES | NO  | YES |
| SPBC36.05c    | SPBC29B5.01   | 0.9999811 | Known | YES | YES | NO  | YES |
| SPAC57A7.04c  | SPBC16A3.05c  | 0.9999811 | Known | NO  | NO  | NO  | YES |
| SPBC106.20    | SPBC651.03c   | 0.999981  | Known | NO  | NO  | YES | NO  |
| SPBC11B10.09  | SPBC342.05    | 0.999981  | Known | NO  | YES | YES | YES |
| SPAC3G9.14    | SPBC14C8.01c  | 0.999981  | Known | NO  | NO  | NO  | YES |
| SPAPB2B4.03   | SPAC144.13c   | 0.999981  | Known | NO  | NO  | YES | YES |
| SPCC1259.13   | SPCC18B5.11c  | 0.999981  | Known | NO  | YES | YES | YES |
| SPBC1718.01   | SPBC11B10.09  | 0.999981  | Known | NO  | YES | YES | YES |
| SPAC57A10.02  | SPBC11B10.09  | 0.999981  | Known | NO  | YES | YES | YES |
| SPBC725.16    | SPBC19F5.01c  | 0.999981  | Known | NO  | NO  | NO  | YES |

|               |               |           |       |     |     |     |     |
|---------------|---------------|-----------|-------|-----|-----|-----|-----|
| SPAC9E9.08    | SPBC1734.02c  | 0.999981  | Known | NO  | NO  | NO  | YES |
| SPBC17G9.04c  | SPAC15F9.02   | 0.999981  | Known | YES | YES | YES | YES |
| SPCC1259.13   | SPBC17D11.06  | 0.9999809 | Known | YES | NO  | NO  | YES |
| SPAC2G11.07c  | SPAC26F1.10c  | 0.9999809 | Known | NO  | NO  | YES | YES |
| SPAC3G6.06c   | SPBC19C7.09c  | 0.9999809 | Known | NO  | NO  | NO  | YES |
| SPAC1952.07   | SPBC29A10.15  | 0.9999809 | Known | NO  | NO  | YES | YES |
| SPAC19G12.02c | SPBC649.03    | 0.9999809 | Known | NO  | NO  | NO  | YES |
| SPCC297.03    | SPAC24B11.06c | 0.9999809 | Known | YES | YES | YES | NO  |
| SPBC16G5.12c  | SPAC644.14c   | 0.9999808 | Known | NO  | YES | NO  | YES |
| SPAC1F7.04    | SPAC1006.06   | 0.9999808 | Known | YES | YES | NO  | NO  |
| SPBC11B10.09  | SPBC336.12c   | 0.9999808 | Known | NO  | YES | YES | YES |
| SPCC777.14    | SPBP22H7.07   | 0.9999808 | Known | NO  | NO  | YES | YES |
| SPBC660.13c   | SPBC119.14    | 0.9999807 | Known | NO  | YES | YES | YES |
| SPCC18B5.11c  | SPAC17H9.19c  | 0.9999807 | Known | NO  | YES | YES | YES |
| SPBC409.07c   | SPAC23D3.04c  | 0.9999807 | Known | YES | NO  | NO  | NO  |
| SPCC1259.13   | SPAC6B12.10c  | 0.9999807 | Known | NO  | NO  | NO  | YES |
| SPBC409.04c   | SPCC736.14    | 0.9999807 | Known | YES | NO  | NO  | YES |
| SPBC3F6.05    | SPAC1F7.04    | 0.9999807 | Known | YES | NO  | NO  | YES |
| SPBC4.07c     | SPBC646.09c   | 0.9999807 | Known | NO  | YES | YES | YES |
| SPBC800.03    | SPAC664.01c   | 0.9999806 | Known | YES | NO  | YES | YES |
| SPAC1556.01c  | SPBC21B10.12  | 0.9999806 | Known | NO  | NO  | YES | YES |
| SPBC1A4.02c   | SPBC409.07c   | 0.9999806 | Known | NO  | NO  | NO  | YES |
| SPBC16A3.07c  | SPAC22F3.09c  | 0.9999806 | Known | YES | NO  | NO  | NO  |
| SPAC6F12.15c  | SPAC688.13    | 0.9999806 | Known | NO  | NO  | NO  | NO  |
| SPAC21E11.03c | SPCC188.13c   | 0.9999806 | Known | NO  | YES | NO  | YES |
| SPAC644.14c   | SPAC9E9.08    | 0.9999806 | Known | NO  | NO  | NO  | YES |
| SPBC1604.14c  | SPCC16C4.08c  | 0.9999806 | Known | NO  | YES | YES | YES |
| SPBC16D10.09  | SPBC16A3.11   | 0.9999805 | Known | NO  | YES | NO  | NO  |
| SPAC1D4.13    | SPBC1D7.05    | 0.9999805 | Known | NO  | YES | YES | YES |
| SPAC13C5.07   | SPAC17A5.11   | 0.9999805 | Known | NO  | NO  | YES | YES |
| SPCC757.09c   | SPBP4H10.04   | 0.9999805 | Known | NO  | NO  | NO  | YES |
| SPCC736.11    | SPAC17A2.13c  | 0.9999805 | Known | NO  | YES | NO  | YES |
| SPAC8E11.02c  | SPCC736.11    | 0.9999805 | Known | NO  | YES | NO  | YES |
| SPAPB8E5.02c  | SPBC646.09c   | 0.9999804 | Known | NO  | YES | YES | YES |
| SPAC1420.03   | SPBC646.09c   | 0.9999804 | Known | NO  | YES | YES | YES |
| SPBC660.13c   | SPAC644.14c   | 0.9999804 | Known | NO  | NO  | YES | YES |
| SPAC9G1.09    | SPBC19C2.05   | 0.9999804 | Known | NO  | YES | YES | YES |
| SPCC4G3.05c   | SPAC644.14c   | 0.9999804 | Known | NO  | YES | YES | YES |
| SPCC1259.13   | SPAC13G7.08c  | 0.9999804 | Known | NO  | NO  | NO  | YES |
| SPAC19G12.01c | SPCC1795.01c  | 0.9999804 | Known | NO  | YES | NO  | YES |
| SPAC24B11.06c | SPAC29A4.16   | 0.9999804 | Known | NO  | YES | YES | YES |
| SPBC4C3.12    | SPBC19F8.07   | 0.9999803 | Known | NO  | NO  | NO  | YES |
| SPAC644.14c   | SPAC14C4.13   | 0.9999803 | Known | YES | YES | NO  | YES |
| SPAC24H6.03   | SPBC25B2.06c  | 0.9999803 | Known | NO  | NO  | NO  | YES |
| SPAC24H6.04   | SPAC4F8.07c   | 0.9999803 | Known | NO  | YES | YES | NO  |
| SPBC1198.13c  | SPAC19B12.05c | 0.9999803 | Known | NO  | NO  | NO  | YES |
| SPBC32C12.02  | SPBC19C2.05   | 0.9999803 | Known | NO  | NO  | NO  | YES |

|                |               |           |       |     |     |     |     |
|----------------|---------------|-----------|-------|-----|-----|-----|-----|
| SPBC2D10.12    | SPBC19C7.09c  | 0.9999802 | Known | NO  | NO  | YES | NO  |
| SPAC24B11.06c  | SPAC17A2.09c  | 0.9999802 | Known | YES | NO  | NO  | NO  |
| SPAC4A8.09c    | SPAC644.12    | 0.9999802 | Known | YES | NO  | YES | NO  |
| SPBC428.08c    | SPBC26H8.07c  | 0.9999802 | Known | NO  | NO  | NO  | YES |
| SPBC12D12.01   | SPBP16F5.07   | 0.9999802 | Known | NO  | NO  | NO  | NO  |
| SPBC12D12.01   | SPCP1E11.04c  | 0.9999801 | Known | NO  | YES | NO  | NO  |
| SPBC28F2.12    | SPBC337.14    | 0.9999801 | Known | NO  | YES | YES | YES |
| SPAC6F12.15c   | SPBC776.02c   | 0.9999801 | Known | NO  | NO  | NO  | YES |
| SPBC24C6.07    | SPBC1709.01   | 0.99998   | Known | NO  | YES | YES | YES |
| SPBC11C11.04c  | SPBC20F10.06  | 0.99998   | Known | NO  | YES | NO  | YES |
| SPAC6B12.11    | SPAC23C4.18c  | 0.99998   | Known | YES | YES | YES | NO  |
| SPCC4B3.14     | SPAC644.12    | 0.99998   | Known | YES | NO  | YES | NO  |
| SPAC57A7.08    | SPBC119.08    | 0.99998   | Known | YES | NO  | YES | NO  |
| SPBC16G5.12c   | SPAC3C7.03c   | 0.99998   | Known | NO  | YES | NO  | YES |
| SPAC1A6.04c    | SPAC23H3.13c  | 0.9999799 | Known | NO  | NO  | YES | YES |
| SPCC18B5.11c   | SPBC19C2.05   | 0.9999799 | Known | NO  | YES | YES | YES |
| SPAC23C4.08    | SPCC970.09    | 0.9999799 | Known | NO  | YES | NO  | YES |
| SPAC16.01      | SPAC1F3.02c   | 0.9999799 | Known | YES | YES | NO  | YES |
| SPBC12D12.01   | SPCC16A11.14  | 0.9999798 | Known | NO  | YES | NO  | NO  |
| SPAC19G12.01c  | SPBC14C8.01c  | 0.9999797 | Known | NO  | NO  | NO  | YES |
| SPAPB17E12.04c | SPAC17H9.19c  | 0.9999797 | Known | YES | NO  | YES | YES |
| SPAC1F5.04c    | SPAC4A8.15c   | 0.9999797 | Known | YES | NO  | YES | YES |
| SPAC3G9.09c    | SPAC20G4.03c  | 0.9999797 | Known | NO  | NO  | NO  | NO  |
| SPBC19G7.01c   | SPAC4G9.11c   | 0.9999796 | Known | NO  | NO  | NO  | YES |
| SPAC1834.06c   | SPBC17F3.02   | 0.9999796 | Known | YES | YES | YES | YES |
| SPAC3A12.14    | SPCC1919.10c  | 0.9999796 | Known | NO  | NO  | NO  | NO  |
| SPBC13G1.13    | SPAC16E8.11c  | 0.9999796 | Known | YES | YES | YES | NO  |
| SPBC428.13c    | SPCC1739.11c  | 0.9999796 | Known | YES | YES | YES | YES |
| SPAC16A10.07c  | SPAC1952.07   | 0.9999796 | Known | NO  | YES | YES | YES |
| SPAC19B12.05c  | SPCC1442.10c  | 0.9999796 | Known | NO  | YES | NO  | YES |
| SPCC18B5.11c   | SPAC27E2.05   | 0.9999795 | Known | NO  | YES | NO  | YES |
| SPBC11B10.09   | SPAC19E9.02   | 0.9999795 | Known | NO  | YES | YES | YES |
| SPAC637.10c    | SPBP19A11.03c | 0.9999795 | Known | YES | NO  | YES | YES |
| SPAC30D11.07   | SPBC19C7.09c  | 0.9999795 | Known | NO  | YES | NO  | YES |
| SPBC1921.02    | SPAC11E3.08c  | 0.9999795 | Known | NO  | YES | NO  | YES |
| SPAC56F8.16    | SPBC106.10    | 0.9999794 | Known | NO  | NO  | YES | YES |
| SPBC36.05c     | SPBC1105.04c  | 0.9999794 | Known | YES | YES | YES | YES |
| SPCC18B5.11c   | SPBC17D11.06  | 0.9999794 | Known | NO  | NO  | NO  | YES |
| SPAC664.01c    | SPAC15A10.15  | 0.9999794 | Known | NO  | NO  | NO  | YES |
| SPAC24B11.06c  | SPBC409.07c   | 0.9999793 | Known | YES | YES | YES | YES |
| SPAC27D7.03c   | SPAC29B12.06c | 0.9999793 | Known | YES | YES | NO  | NO  |
| SPAC19D5.01    | SPBC11B10.09  | 0.9999792 | Known | NO  | YES | NO  | YES |
| SPAC6G9.08     | SPBC4.07c     | 0.9999792 | Known | NO  | NO  | NO  | YES |
| SPBC409.07c    | SPCC4F11.02   | 0.9999792 | Known | NO  | NO  | NO  | YES |
| SPBC1921.03c   | SPBC16A3.05c  | 0.9999792 | Known | YES | YES | YES | YES |
| SPBC32F12.09   | SPAC20G8.05c  | 0.9999791 | Known | NO  | NO  | NO  | NO  |
| SPAC13C5.07    | SPAC1952.07   | 0.9999791 | Known | NO  | YES | YES | YES |

|               |              |           |       |     |     |     |     |
|---------------|--------------|-----------|-------|-----|-----|-----|-----|
| SPBC11B10.09  | SPBC29A10.15 | 0.9999791 | Known | NO  | YES | YES | YES |
| SPCC613.12c   | SPAC664.01c  | 0.9999791 | Known | YES | YES | YES | YES |
| SPBC36.12c    | SPAC26F1.10c | 0.9999791 | Known | NO  | NO  | YES | NO  |
| SPBC2D10.12   | SPBC29B5.01  | 0.9999791 | Known | NO  | NO  | NO  | YES |
| SPAC22E12.07  | SPBC557.03c  | 0.999979  | Known | NO  | NO  | YES | NO  |
| SPBC21.06c    | SPAC1F7.04   | 0.999979  | Known | NO  | YES | NO  | YES |
| SPCC970.07c   | SPAC664.01c  | 0.999979  | Known | YES | YES | YES | YES |
| SPAC926.04c   | SPBC11B10.09 | 0.999979  | Known | NO  | YES | NO  | YES |
| SPAC24B11.06c | SPAC24H6.05  | 0.999979  | Known | YES | YES | NO  | YES |
| SPAC17H9.19c  | SPBC215.03c  | 0.9999789 | Known | YES | NO  | YES | YES |
| SPCC364.02c   | SPBC1604.08c | 0.9999789 | Known | NO  | NO  | YES | NO  |
| SPAC110.03    | SPAC1F3.02c  | 0.9999789 | Known | YES | YES | NO  | YES |
| SPBC409.04c   | SPCC895.07   | 0.9999789 | Known | YES | YES | NO  | YES |
| SPAC27E2.10c  | SPAC14C4.13  | 0.9999789 | Known | YES | YES | YES | NO  |
| SPAC17G8.13c  | SPBC776.12c  | 0.9999789 | Known | NO  | NO  | NO  | YES |
| SPBC24C6.06   | SPAC343.04c  | 0.9999789 | Known | NO  | NO  | NO  | NO  |
| SPAC6B12.15   | SPBC1D7.05   | 0.9999788 | Known | YES | YES | NO  | NO  |
| SPBC20F10.06  | SPCC1322.12c | 0.9999788 | Known | YES | YES | YES | YES |
| SPAC23D3.02   | SPAC14C4.13  | 0.9999788 | Known | YES | YES | YES | NO  |
| SPCC18B5.11c  | SPAC13G7.08c | 0.9999788 | Known | YES | NO  | NO  | YES |
| SPCC338.17c   | SPAC664.01c  | 0.9999787 | Known | NO  | YES | NO  | YES |
| SPBC27.02c    | SPAC1687.20c | 0.9999787 | Known | YES | NO  | YES | YES |
| SPAC1F7.04    | SPCC1739.11c | 0.9999787 | Known | NO  | YES | NO  | YES |
| SPBC31F10.04c | SPBC14F5.08  | 0.9999787 | Known | YES | NO  | YES | YES |
| SPBC26H8.10   | SPBC1289.03c | 0.9999787 | Known | NO  | YES | YES | YES |
| SPBC1718.07c  | SPAC821.07c  | 0.9999786 | Known | NO  | YES | YES | NO  |
| SPCC645.05c   | SPAC29A4.05  | 0.9999786 | Known | NO  | YES | NO  | NO  |
| SPBC21.06c    | SPAC1565.06c | 0.9999786 | Known | YES | YES | YES | YES |
| SPBC21C3.18   | SPBC1778.04  | 0.9999786 | Known | NO  | NO  | YES | NO  |
| SPBC32F12.04  | SPBC16A3.15c | 0.9999785 | Known | YES | YES | YES | NO  |
| SPBC543.07    | SPBP4H10.04  | 0.9999785 | Known | NO  | NO  | NO  | YES |
| SPCC18B5.11c  | SPCC4B3.12   | 0.9999785 | Known | YES | NO  | YES | YES |
| SPAC6F6.08c   | SPAC23C11.16 | 0.9999785 | Known | YES | YES | NO  | YES |
| SPBC651.10    | SPAC11E3.08c | 0.9999785 | Known | YES | YES | YES | YES |
| SPAC25B8.14   | SPAC1687.20c | 0.9999784 | Known | YES | YES | YES | YES |
| SPAC9.13c     | SPAC644.12   | 0.9999784 | Known | YES | YES | YES | NO  |
| SPBC1734.06   | SPAC11E3.08c | 0.9999784 | Known | NO  | NO  | NO  | YES |
| SPAC24B11.06c | SPCC1322.08  | 0.9999784 | Known | YES | YES | YES | YES |
| SPBC32F12.06  | SPBC32H8.10  | 0.9999784 | Known | NO  | YES | NO  | NO  |
| SPBC19G7.05c  | SPAC4A8.15c  | 0.9999783 | Known | NO  | NO  | NO  | NO  |
| SPBC646.09c   | SPAC1751.03  | 0.9999783 | Known | YES | YES | NO  | YES |
| SPAC6F12.12   | SPBC16H5.07c | 0.9999783 | Known | NO  | NO  | NO  | YES |
| SPCC645.05c   | SPAP8A3.08   | 0.9999782 | Known | YES | YES | YES | YES |
| SPAC6F12.15c  | SPBC14C8.01c | 0.9999782 | Known | NO  | NO  | NO  | YES |
| SPBC2F12.09c  | SPBC29B5.01  | 0.9999782 | Known | NO  | YES | YES | YES |
| SPAC8E11.03c  | SPAC14C4.13  | 0.9999782 | Known | NO  | YES | YES | YES |
| SPBC14C8.12   | SPBC28F2.12  | 0.9999782 | Known | NO  | YES | YES | YES |

|               |               |           |       |     |     |     |     |
|---------------|---------------|-----------|-------|-----|-----|-----|-----|
| SPAC1565.06c  | SPCC1739.11c  | 0.9999782 | Known | YES | YES | YES | YES |
| SPBC32F12.04  | SPBC800.05c   | 0.9999782 | Known | YES | YES | YES | NO  |
| SPBC1105.04c  | SPCC364.02c   | 0.9999782 | Known | NO  | NO  | NO  | NO  |
| SPAC27D7.03c  | SPAC8E11.02c  | 0.9999782 | Known | YES | YES | NO  | YES |
| SPAC16A10.04  | SPAC821.09    | 0.9999782 | Known | NO  | NO  | YES | YES |
| SPAC26A3.16   | SPBC29B5.01   | 0.9999782 | Known | NO  | NO  | NO  | YES |
| SPAC664.07c   | SPAC30D11.10  | 0.9999782 | Known | NO  | YES | NO  | YES |
| SPBC582.05c   | SPCC550.05    | 0.9999781 | Known | NO  | NO  | YES | YES |
| SPAPB24D3.04c | SPCC970.01    | 0.9999781 | Known | NO  | NO  | NO  | NO  |
| SPAC1F7.04    | SPBC12D12.04c | 0.9999781 | Known | YES | YES | YES | YES |
| SPAC24H6.05   | SPBC19F8.07   | 0.9999781 | Known | YES | NO  | NO  | YES |
| SPAC57A10.05c | SPAC25G10.03  | 0.9999781 | Known | NO  | YES | YES | NO  |
| SPAC23G3.01   | SPACUNK4.06c  | 0.9999781 | Known | NO  | YES | YES | YES |
| SPAC17C9.01c  | SPBC14C8.01c  | 0.999978  | Known | NO  | NO  | NO  | YES |
| SPAC1420.03   | SPBC4.07c     | 0.999978  | Known | NO  | YES | YES | YES |
| SPAPB8E5.02c  | SPBC4.07c     | 0.999978  | Novel | NO  | YES | YES | YES |
| SPBC11C11.04c | SPAC22F3.05c  | 0.999978  | Known | NO  | NO  | NO  | NO  |
| SPBC530.14c   | SPAC16.02c    | 0.999978  | Known | NO  | NO  | NO  | YES |
| SPAC13D6.01   | SPBC646.05c   | 0.999978  | Known | YES | YES | NO  | NO  |
| SPBC337.06c   | SPAC644.12    | 0.999978  | Known | YES | NO  | YES | NO  |
| SPBC582.03    | SPAPB2B4.03   | 0.999978  | Known | YES | YES | YES | YES |
| SPCC18B5.03   | SPBC32F12.09  | 0.9999779 | Known | NO  | NO  | NO  | YES |
| SPAC222.10c   | SPAC6F6.08c   | 0.9999779 | Known | YES | YES | NO  | YES |
| SPAC19G12.02c | SPBC4F6.15c   | 0.9999779 | Known | NO  | YES | NO  | YES |
| SPBC16D10.09  | SPAC20G8.01   | 0.9999778 | Known | YES | YES | NO  | YES |
| SPAC24B11.06c | SPBC29B5.01   | 0.9999778 | Known | NO  | YES | YES | YES |
| SPAC16.01     | SPBC12D12.04c | 0.9999778 | Known | YES | YES | YES | YES |
| SPAC3A12.07   | SPBC28F2.12   | 0.9999778 | Known | YES | YES | YES | YES |
| SPAC664.07c   | SPAC26A3.02   | 0.9999778 | Known | NO  | YES | YES | YES |
| SPAC1420.03   | SPAPB8E5.02c  | 0.9999778 | Known | YES | YES | YES | YES |
| SPCC18B5.11c  | SPAC664.07c   | 0.9999777 | Known | NO  | YES | YES | YES |
| SPAC664.07c   | SPBC17D11.06  | 0.9999777 | Known | NO  | NO  | NO  | YES |
| SPBC11B10.09  | SPBC4C3.12    | 0.9999777 | Known | NO  | NO  | NO  | YES |
| SPCC18B5.06   | SPAC8F11.07c  | 0.9999776 | Known | NO  | NO  | NO  | YES |
| SPCC126.02c   | SPAC1952.07   | 0.9999776 | Known | NO  | NO  | NO  | YES |
| SPAC1952.07   | SPAC14C4.13   | 0.9999776 | Known | NO  | NO  | YES | YES |
| SPAC3G9.09c   | SPAC222.07c   | 0.9999775 | Known | NO  | NO  | NO  | NO  |
| SPCC645.05c   | SPAC20G4.06c  | 0.9999775 | Known | NO  | YES | NO  | YES |
| SPAC24H6.05   | SPBC25B2.05   | 0.9999775 | Known | NO  | NO  | NO  | YES |
| SPBC11B10.09  | SPBC1604.14c  | 0.9999775 | Known | NO  | YES | YES | YES |
| SPAC227.16c   | SPBP23A10.07  | 0.9999775 | Known | NO  | NO  | NO  | NO  |
| SPBC11B10.09  | SPAC22F3.09c  | 0.9999775 | Known | NO  | YES | YES | YES |
| SPAC1F7.04    | SPAC17G8.14c  | 0.9999774 | Known | NO  | YES | YES | YES |
| SPBC19C2.05   | SPAC8C9.03    | 0.9999774 | Known | NO  | NO  | YES | YES |
| SPBC1198.11c  | SPCC364.02c   | 0.9999774 | Known | NO  | NO  | NO  | NO  |
| SPBC16A3.01   | SPAC4F10.11   | 0.9999774 | Known | YES | YES | YES | YES |
| SPAC9G1.09    | SPBC1718.07c  | 0.9999774 | Known | NO  | YES | NO  | YES |

|               |               |           |       |     |     |     |     |
|---------------|---------------|-----------|-------|-----|-----|-----|-----|
| SPAPB2B4.03   | SPBC19C2.05   | 0.9999774 | Known | NO  | YES | NO  | YES |
| SPAC17H9.09c  | SPBC19C2.09   | 0.9999774 | Known | NO  | NO  | NO  | NO  |
| SPAC3A11.05c  | SPCC895.04c   | 0.9999773 | Known | NO  | NO  | NO  | YES |
| SPAC823.15    | SPAC6F12.12   | 0.9999773 | Novel | NO  | NO  | NO  | YES |
| SPAC18G6.15   | SPBC1604.20c  | 0.9999773 | Known | YES | YES | YES | YES |
| SPAC24B11.06c | SPAC1783.07c  | 0.9999773 | Known | YES | NO  | YES | YES |
| SPBC21C3.05   | SPBC6B1.07    | 0.9999772 | Known | NO  | NO  | NO  | YES |
| SPCC1259.13   | SPBC1734.06   | 0.9999772 | Known | NO  | NO  | YES | YES |
| SPAC16.01     | SPAC17G8.14c  | 0.9999772 | Known | YES | YES | NO  | YES |
| SPAC24B11.06c | SPAC26F1.10c  | 0.9999772 | Known | NO  | NO  | NO  | YES |
| SPBC25D12.04  | SPAC17H9.19c  | 0.9999772 | Known | NO  | YES | NO  | YES |
| SPAC24H6.05   | SPBC16H5.07c  | 0.9999771 | Known | YES | YES | YES | YES |
| SPBC12D12.01  | SPAC19E9.01c  | 0.999977  | Known | YES | YES | NO  | NO  |
| SPCC4F11.02   | SPAC26F1.10c  | 0.999977  | Known | NO  | NO  | YES | YES |
| SPAC644.14c   | SPAC11E3.08c  | 0.999977  | Known | NO  | YES | NO  | YES |
| SPAC1782.09c  | SPCC320.13c   | 0.999977  | Known | YES | YES | YES | NO  |
| SPBC11B10.09  | SPBC16H5.11c  | 0.999977  | Known | NO  | YES | NO  | YES |
| SPBC146.07    | SPBC1289.02c  | 0.9999769 | Known | YES | NO  | YES | YES |
| SPAC3A12.11c  | SPAC29A4.08c  | 0.9999769 | Known | YES | YES | YES | YES |
| SPAC22E12.07  | SPBC428.08c   | 0.9999769 | Known | NO  | NO  | YES | YES |
| SPBC336.04    | SPBC30D10.04  | 0.9999769 | Known | YES | YES | NO  | YES |
| SPAC17H9.09c  | SPBC2F12.13   | 0.9999769 | Known | NO  | NO  | NO  | YES |
| SPAC16A10.07c | SPAC20G4.04c  | 0.9999768 | Known | NO  | YES | YES | YES |
| SPAC110.03    | SPBC12D12.04c | 0.9999768 | Known | YES | YES | YES | YES |
| SPBC13G1.13   | SPCC1682.07   | 0.9999768 | Known | YES | YES | YES | NO  |
| SPBC11B10.09  | SPCC1795.11   | 0.9999767 | Known | NO  | YES | YES | YES |
| SPBC12D12.01  | SPAC12G12.11c | 0.9999767 | Known | NO  | YES | NO  | NO  |
| SPAP8A3.09c   | SPBP35G2.03c  | 0.9999767 | Known | NO  | NO  | NO  | YES |
| SPBC32F12.09  | SPBC4.04c     | 0.9999766 | Known | NO  | NO  | NO  | YES |
| SPAC19D5.03   | SPAC27E2.05   | 0.9999766 | Known | NO  | NO  | NO  | YES |
| SPCC18B5.11c  | SPBC1921.02   | 0.9999766 | Known | NO  | YES | NO  | YES |
| SPAC17H9.09c  | SPAC16E8.09   | 0.9999766 | Known | NO  | NO  | YES | YES |
| SPBC3D6.09    | SPCC16A11.17  | 0.9999765 | Known | NO  | YES | YES | YES |
| SPBC1734.02c  | SPAC8F11.07c  | 0.9999765 | Known | NO  | YES | YES | YES |
| SPAC25G10.03  | SPBC29B5.01   | 0.9999765 | Known | NO  | YES | YES | NO  |
| SPBC1604.06c  | SPCC364.02c   | 0.9999765 | Known | NO  | NO  | NO  | NO  |
| SPBC16C6.10   | SPBC428.08c   | 0.9999765 | Known | YES | YES | YES | YES |
| SPAC1952.07   | SPAC821.04c   | 0.9999765 | Known | NO  | NO  | YES | YES |
| SPAC1952.07   | SPCC338.16    | 0.9999764 | Known | NO  | YES | NO  | YES |
| SPBC3D6.10    | SPAC30D11.07  | 0.9999764 | Known | NO  | YES | YES | YES |
| SPAC4D7.05    | SPAC637.07    | 0.9999764 | Known | YES | YES | YES | YES |
| SPAC18B11.10  | SPAC644.04    | 0.9999763 | Known | NO  | YES | NO  | YES |
| SPAC664.01c   | SPBC29B5.01   | 0.9999763 | Known | NO  | YES | NO  | YES |
| SPAC13C5.07   | SPAC20G4.04c  | 0.9999763 | Known | NO  | YES | YES | YES |
| SPAC1952.05   | SPAC17G8.13c  | 0.9999763 | Known | YES | YES | YES | NO  |
| SPAC22A12.03c | SPAC17H9.19c  | 0.9999763 | Known | YES | NO  | NO  | YES |
| SPBC2A9.12    | SPBC29A10.15  | 0.9999763 | Known | YES | YES | YES | YES |



|                |               |           |       |     |     |     |     |
|----------------|---------------|-----------|-------|-----|-----|-----|-----|
| SPAC20G4.04c   | SPAC23C4.18c  | 0.9999763 | Known | NO  | YES | YES | YES |
| SPAC1687.20c   | SPBC18E5.03c  | 0.9999763 | Known | YES | YES | YES | YES |
| SPAPB17E12.04c | SPBC215.03c   | 0.9999763 | Known | YES | NO  | YES | YES |
| SPBC83.04      | SPBC106.09    | 0.9999762 | Known | YES | NO  | YES | YES |
| SPAC110.03     | SPAC17G8.14c  | 0.9999761 | Known | YES | YES | YES | YES |
| SPAC24H6.05    | SPAC823.15    | 0.9999761 | Novel | NO  | YES | YES | NO  |
| SPBC4C3.05c    | SPCC1259.03   | 0.9999761 | Known | YES | YES | YES | NO  |
| SPBC106.09     | SPBC28E12.01c | 0.999976  | Known | YES | YES | YES | YES |
| SPAC1687.18c   | SPAC664.01c   | 0.999976  | Known | NO  | YES | YES | YES |
| SPBC3H7.15     | SPAC8F11.07c  | 0.999976  | Known | YES | NO  | NO  | NO  |
| SPBP4H10.04    | SPBC776.02c   | 0.999976  | Known | NO  | YES | YES | NO  |
| SPAC3C7.03c    | SPAC11E3.08c  | 0.999976  | Known | NO  | NO  | YES | YES |
| SPCC4G3.05c    | SPBC20F10.04c | 0.9999758 | Known | NO  | YES | NO  | YES |
| SPAC4H3.05     | SPBC11B10.06  | 0.9999758 | Known | NO  | NO  | YES | YES |
| SPBC582.03     | SPBC32H8.12c  | 0.9999757 | Known | NO  | NO  | NO  | YES |
| SPAC23C11.16   | SPAC17G8.10c  | 0.9999757 | Known | YES | NO  | NO  | YES |
| SPBC21.01      | SPBP22H7.09c  | 0.9999757 | Known | YES | YES | YES | YES |
| SPAC24B11.11c  | SPAC6F6.08c   | 0.9999757 | Known | YES | YES | NO  | YES |
| SPBC2A9.12     | SPAC3H1.01c   | 0.9999757 | Known | YES | YES | YES | YES |
| SPAC1D4.06c    | SPBC32H8.10   | 0.9999756 | Known | NO  | YES | YES | NO  |
| SPBP4H10.04    | SPBC16H5.07c  | 0.9999756 | Known | NO  | YES | YES | NO  |
| SPAC24H6.05    | SPAC11E3.09   | 0.9999756 | Known | YES | YES | YES | YES |
| SPAC8E11.02c   | SPAC6F12.15c  | 0.9999756 | Known | NO  | YES | NO  | YES |
| SPAC17A2.13c   | SPAC6F12.15c  | 0.9999756 | Known | NO  | YES | NO  | YES |
| SPAC4D7.13     | SPAC19A8.13   | 0.9999756 | Known | YES | NO  | YES | NO  |
| SPBC839.10     | SPAC19A8.13   | 0.9999756 | Known | YES | NO  | YES | NO  |
| SPAC144.13c    | SPAC1952.07   | 0.9999755 | Known | NO  | NO  | NO  | YES |
| SPBC32C12.02   | SPAC17G6.04c  | 0.9999755 | Known | NO  | NO  | NO  | NO  |
| SPAC821.05     | SPBC646.09c   | 0.9999755 | Known | YES | YES | YES | YES |
| SPAPYUG7.04c   | SPBC28F2.12   | 0.9999755 | Known | NO  | YES | YES | YES |
| SPBC3D6.10     | SPCC622.17    | 0.9999754 | Known | NO  | YES | YES | YES |
| SPBC409.04c    | SPCC290.04    | 0.9999754 | Known | NO  | NO  | YES | NO  |
| SPBC29A10.14   | SPBP35G2.03c  | 0.9999754 | Known | NO  | NO  | YES | YES |
| SPCC550.13     | SPAC664.01c   | 0.9999754 | Known | NO  | YES | YES | YES |
| SPAC20G8.05c   | SPAC1565.06c  | 0.9999754 | Known | NO  | YES | NO  | YES |
| SPAC9G1.11c    | SPAC4F10.11   | 0.9999754 | Known | YES | YES | YES | YES |
| SPBC32H8.10    | SPAC644.04    | 0.9999754 | Known | NO  | YES | NO  | YES |
| SPAC6G10.07    | SPCC550.05    | 0.9999753 | Known | NO  | NO  | NO  | NO  |
| SPAC630.14c    | SPAC644.04    | 0.9999752 | Known | NO  | YES | NO  | YES |
| SPAC4F10.15c   | SPBC13E7.09   | 0.9999752 | Known | YES | YES | YES | YES |
| SPAC6F6.08c    | SPAC2F3.15    | 0.9999751 | Known | NO  | NO  | NO  | YES |
| SPBC1D7.05     | SPAC17A2.13c  | 0.9999751 | Known | NO  | YES | NO  | YES |
| SPAC8E11.02c   | SPBC1D7.05    | 0.9999751 | Known | YES | YES | NO  | YES |
| SPCC553.07c    | SPAC1952.07   | 0.9999751 | Known | NO  | YES | YES | YES |
| SPAC24H6.05    | SPBC11B10.09  | 0.9999751 | Known | NO  | YES | YES | YES |
| SPCC188.02     | SPBC16H5.07c  | 0.999975  | Known | NO  | NO  | NO  | YES |
| SPAC17C9.01c   | SPAC17G8.10c  | 0.999975  | Known | YES | YES | YES | NO  |

|               |               |           |       |     |     |     |     |
|---------------|---------------|-----------|-------|-----|-----|-----|-----|
| SPAC24B11.06c | SPAC23A1.06c  | 0.999975  | Known | YES | YES | YES | YES |
| SPAC3G6.06c   | SPAC27E2.05   | 0.999975  | Known | YES | YES | YES | YES |
| SPBP23A10.08  | SPBC36.05c    | 0.999975  | Known | NO  | NO  | YES | NO  |
| SPBC1921.03c  | SPCC1753.05   | 0.999975  | Known | NO  | NO  | NO  | NO  |
| SPBC11B10.09  | SPAC644.06c   | 0.9999749 | Known | NO  | YES | YES | YES |
| SPBC1718.01   | SPBC32F12.09  | 0.9999749 | Known | NO  | NO  | YES | YES |
| SPAC20G4.04c  | SPAC9E9.08    | 0.9999749 | Known | NO  | NO  | YES | YES |
| SPAC24H6.05   | SPBC725.02    | 0.9999749 | Known | NO  | YES | YES | YES |
| SPBC36.05c    | SPAC29A4.18   | 0.9999749 | Known | YES | YES | YES | YES |
| SPAC17G8.10c  | SPBC244.01c   | 0.9999748 | Known | YES | NO  | NO  | YES |
| SPCC188.02    | SPBP35G2.03c  | 0.9999748 | Known | NO  | NO  | NO  | YES |
| SPBC1105.11c  | SPCC188.13c   | 0.9999748 | Novel | NO  | YES | NO  | YES |
| SPCC188.13c   | SPBC8D2.04    | 0.9999748 | Known | NO  | YES | NO  | YES |
| SPCC188.13c   | SPAC1834.04   | 0.9999748 | Known | NO  | YES | NO  | YES |
| SPBC32C12.02  | SPAC31G5.09c  | 0.9999748 | Known | NO  | NO  | NO  | NO  |
| SPBC119.14    | SPAC30D11.10  | 0.9999748 | Known | NO  | YES | YES | YES |
| SPAC17C9.13c  | SPAC6F12.15c  | 0.9999748 | Known | NO  | NO  | YES | YES |
| SPAC18G6.15   | SPAC637.07    | 0.9999747 | Known | NO  | YES | YES | NO  |
| SPBC32F12.09  | SPBC336.12c   | 0.9999747 | Known | NO  | NO  | NO  | YES |
| SPAC824.04    | SPAC12G12.14c | 0.9999747 | Known | YES | NO  | YES | YES |
| SPBC32H8.12c  | SPAC27E2.05   | 0.9999746 | Known | NO  | NO  | NO  | NO  |
| SPAC24H6.12c  | SPBC3D6.02    | 0.9999746 | Known | NO  | YES | NO  | NO  |
| SPCC126.02c   | SPAC20G4.04c  | 0.9999746 | Known | NO  | NO  | NO  | YES |
| SPBC582.03    | SPBC19F5.01c  | 0.9999746 | Known | NO  | YES | YES | YES |
| SPBC20F10.06  | SPBC16A3.11   | 0.9999745 | Known | NO  | YES | NO  | YES |
| SPAC3A12.14   | SPBC146.13c   | 0.9999745 | Known | YES | YES | NO  | NO  |
| SPAC823.15    | SPBP4H10.04   | 0.9999745 | Novel | NO  | YES | YES | NO  |
| SPAC1952.07   | SPBC685.09    | 0.9999745 | Known | NO  | NO  | NO  | YES |
| SPBC1D7.05    | SPAC1565.04c  | 0.9999745 | Known | YES | YES | YES | YES |
| SPAC27E2.05   | SPBC1734.02c  | 0.9999744 | Known | YES | YES | YES | YES |
| SPAC6G9.06c   | SPAC3A12.14   | 0.9999743 | Known | YES | YES | YES | NO  |
| SPCC18B5.11c  | SPBC1734.02c  | 0.9999743 | Known | NO  | YES | NO  | YES |
| SPAC30D11.10  | SPAC644.14c   | 0.9999743 | Known | NO  | YES | YES | YES |
| SPCC1259.13   | SPAC17A5.11   | 0.9999743 | Known | NO  | YES | NO  | YES |
| SPBC12D12.01  | SPAC17H9.05   | 0.9999743 | Known | YES | YES | NO  | NO  |
| SPBC11B10.09  | SPAC821.04c   | 0.9999743 | Known | NO  | YES | YES | YES |
| SPAC11E3.08c  | SPCC645.04    | 0.9999743 | Known | YES | YES | YES | YES |
| SPAC2F7.04    | SPBC14F5.08   | 0.9999742 | Known | YES | YES | YES | YES |
| SPCC18B5.03   | SPBC21.04     | 0.9999742 | Known | NO  | YES | NO  | YES |
| SPBC16A3.15c  | SPBC32H8.12c  | 0.9999742 | Known | NO  | NO  | NO  | NO  |
| SPBC11B10.09  | SPBC14C8.07c  | 0.9999742 | Known | NO  | YES | YES | YES |
| SPBC3E7.13c   | SPAC644.12    | 0.9999742 | Known | YES | NO  | YES | NO  |
| SPCC970.07c   | SPAC8E11.02c  | 0.9999742 | Known | YES | YES | YES | YES |
| SPAC17H9.09c  | SPBC354.05c   | 0.9999742 | Known | NO  | NO  | NO  | NO  |
| SPBC216.06c   | SPBC30D10.04  | 0.9999741 | Known | YES | YES | YES | YES |
| SPAC27F1.04c  | SPCC364.02c   | 0.999974  | Known | NO  | NO  | NO  | NO  |
| SPAC31G5.13   | SPAC1783.07c  | 0.999974  | Known | YES | NO  | NO  | NO  |

|                |               |           |       |     |     |     |     |
|----------------|---------------|-----------|-------|-----|-----|-----|-----|
| SPAC6F12.14    | SPBC14C8.01c  | 0.999974  | Known | NO  | NO  | NO  | YES |
| SPBC409.06     | SPBC29B5.01   | 0.999974  | Known | NO  | NO  | NO  | YES |
| SPAPB2B4.03    | SPAC19E9.03   | 0.999974  | Known | NO  | YES | YES | YES |
| SPCC594.05c    | SPAC23H3.05c  | 0.9999739 | Known | YES | NO  | YES | YES |
| SPAC823.15     | SPCC188.02    | 0.9999739 | Known | NO  | NO  | NO  | YES |
| SPAC8C9.03     | SPBC646.13    | 0.9999738 | Known | NO  | NO  | NO  | YES |
| SPCC757.09c    | SPBC119.08    | 0.9999738 | Known | NO  | YES | YES | YES |
| SPCC18B5.11c   | SPAC644.14c   | 0.9999738 | Known | NO  | YES | NO  | YES |
| SPBC24C6.06    | SPBC1718.07c  | 0.9999736 | Known | NO  | NO  | NO  | YES |
| SPAC27F1.02c   | SPAC2F7.03c   | 0.9999736 | Known | NO  | NO  | NO  | YES |
| SPAC926.04c    | SPBC24C6.07   | 0.9999736 | Known | NO  | NO  | NO  | NO  |
| SPAC1F7.05     | SPBC3D6.09    | 0.9999736 | Known | NO  | YES | NO  | YES |
| SPAC664.01c    | SPBC776.12c   | 0.9999735 | Known | NO  | YES | YES | YES |
| SPAC2F7.11     | SPAC6B12.15   | 0.9999734 | Known | YES | YES | NO  | NO  |
| SPBC336.04     | SPBC12D12.02c | 0.9999734 | Known | YES | YES | YES | YES |
| SPAPB2B4.03    | SPBC16E9.17c  | 0.9999734 | Known | NO  | YES | YES | NO  |
| SPCC1672.10    | SPCC364.02c   | 0.9999733 | Known | NO  | NO  | NO  | NO  |
| SPAC15A10.08   | SPAC631.01c   | 0.9999733 | Known | NO  | NO  | NO  | YES |
| SPCC1753.02c   | SPAC23H3.13c  | 0.9999733 | Known | NO  | NO  | YES | YES |
| SPBC1709.01    | SPAC926.03    | 0.9999733 | Known | NO  | YES | YES | YES |
| SPAPB17E12.04c | SPAC22A12.03c | 0.9999733 | Known | YES | NO  | YES | YES |
| SPBC336.12c    | SPBC2F12.11c  | 0.9999733 | Known | YES | YES | YES | YES |
| SPAC3A11.14c   | SPBC20F10.06  | 0.9999733 | Known | NO  | NO  | NO  | YES |
| SPAC110.03     | SPBC2F12.13   | 0.9999732 | Known | NO  | YES | NO  | YES |
| SPAC17H9.09c   | SPBC646.12c   | 0.9999732 | Known | NO  | NO  | YES | YES |
| SPAC8E11.02c   | SPAC9E9.08    | 0.9999732 | Known | NO  | NO  | YES | YES |
| SPBC11B10.09   | SPAC144.13c   | 0.9999732 | Known | NO  | NO  | NO  | YES |
| SPAC3C7.03c    | SPAC30D11.10  | 0.9999732 | Known | NO  | NO  | YES | YES |
| SPAC4D7.05     | SPBC646.09c   | 0.9999731 | Known | YES | YES | NO  | YES |
| SPBC146.13c    | SPAC29A4.05   | 0.9999731 | Known | YES | YES | NO  | NO  |
| SPBC12D12.01   | SPCC895.04c   | 0.9999731 | Known | NO  | NO  | NO  | YES |
| SPBC32C12.02   | SPAC24B11.06c | 0.999973  | Known | NO  | NO  | NO  | NO  |
| SPAC24B11.06c  | SPAC977.10    | 0.999973  | Known | NO  | NO  | YES | YES |
| SPBC21.06c     | SPAC27F1.02c  | 0.999973  | Known | NO  | NO  | NO  | YES |
| SPCC188.02     | SPAC6F6.08c   | 0.999973  | Known | NO  | NO  | YES | YES |
| SPCC622.08c    | SPAC2G11.12   | 0.999973  | Known | NO  | YES | NO  | YES |
| SPBC32F12.09   | SPAC1B2.05    | 0.999973  | Known | NO  | NO  | NO  | YES |
| SPBC11B10.09   | SPAC26F1.10c  | 0.9999729 | Known | NO  | NO  | NO  | YES |
| SPAC110.03     | SPAC16E8.09   | 0.9999729 | Known | YES | YES | YES | YES |
| SPAC24B11.06c  | SPBC9B6.10    | 0.9999729 | Known | YES | YES | NO  | YES |
| SPAC23A1.06c   | SPAC1952.07   | 0.9999729 | Known | NO  | YES | YES | NO  |
| SPBC649.05     | SPBC11B10.09  | 0.9999728 | Known | NO  | YES | NO  | YES |
| SPBC19C2.05    | SPAC17A5.11   | 0.9999728 | Known | NO  | YES | NO  | YES |
| SPBC21B10.05c  | SPBC146.07    | 0.9999728 | Known | NO  | NO  | NO  | NO  |
| SPAC23G3.11    | SPCC364.02c   | 0.9999727 | Known | NO  | NO  | NO  | NO  |
| SPBC428.20c    | SPBC20F10.06  | 0.9999727 | Known | NO  | YES | YES | YES |
| SPAC19G12.06c  | SPAC2G11.12   | 0.9999727 | Known | NO  | YES | NO  | YES |

|               |              |           |       |     |     |     |     |
|---------------|--------------|-----------|-------|-----|-----|-----|-----|
| SPAC1952.07   | SPAC8F11.07c | 0.9999727 | Known | NO  | YES | NO  | YES |
| SPAC23G3.01   | SPCC1020.04c | 0.9999727 | Known | NO  | YES | YES | YES |
| SPBC365.12c   | SPAC13G6.07c | 0.9999727 | Novel | NO  | NO  | NO  | NO  |
| SPBC365.12c   | SPAPB1E7.12  | 0.9999727 | Known | NO  | NO  | NO  | NO  |
| SPBC582.03    | SPBC19F8.07  | 0.9999727 | Known | NO  | NO  | NO  | YES |
| SPBC354.03    | SPCC594.05c  | 0.9999726 | Known | YES | NO  | YES | YES |
| SPBC21C3.05   | SPAC644.12   | 0.9999726 | Known | YES | NO  | NO  | YES |
| SPBC887.05c   | SPAC644.12   | 0.9999726 | Known | YES | NO  | NO  | NO  |
| SPCC1753.02c  | SPCC285.09c  | 0.9999726 | Known | NO  | NO  | NO  | YES |
| SPBC32F12.05c | SPAC644.12   | 0.9999726 | Known | YES | NO  | YES | NO  |
| SPBC428.16c   | SPAC22F3.13  | 0.9999726 | Known | NO  | YES | NO  | YES |
| SPAC637.10c   | SPAC6F12.15c | 0.9999726 | Known | NO  | NO  | NO  | YES |
| SPAC630.03    | SPBC14C8.06  | 0.9999726 | Known | YES | YES | YES | NO  |
| SPAC27F1.02c  | SPCC1739.11c | 0.9999725 | Known | YES | NO  | YES | YES |
| SPBC428.08c   | SPAC664.01c  | 0.9999725 | Known | YES | YES | YES | YES |
| SPCC663.12    | SPAC1B1.01   | 0.9999725 | Known | NO  | NO  | NO  | YES |
| SPBC20F10.06  | SPCC895.07   | 0.9999725 | Known | YES | YES | YES | YES |
| SPBC409.04c   | SPBC11C11.03 | 0.9999725 | Known | YES | YES | YES | YES |
| SPCC1259.13   | SPAC1952.07  | 0.9999724 | Known | NO  | YES | YES | YES |
| SPAC6F6.08c   | SPAC1782.09c | 0.9999724 | Known | YES | YES | YES | YES |
| SPAC24H6.05   | SPAC8E11.02c | 0.9999724 | Known | YES | YES | NO  | YES |
| SPAC24H6.05   | SPBC16G5.01  | 0.9999724 | Known | NO  | NO  | NO  | NO  |
| SPAC24H6.05   | SPAC17A2.13c | 0.9999724 | Known | NO  | YES | NO  | YES |
| SPCC1620.09c  | SPCC1442.10c | 0.9999723 | Known | NO  | YES | NO  | YES |
| SPAC4D7.03    | SPBC32F12.09 | 0.9999723 | Known | NO  | NO  | NO  | YES |
| SPAC8E11.02c  | SPAC644.06c  | 0.9999722 | Known | YES | NO  | NO  | YES |
| SPBC11B10.09  | SPAC1782.09c | 0.9999722 | Known | NO  | YES | YES | YES |
| SPCC5E4.03c   | SPAC22H12.02 | 0.9999722 | Known | YES | YES | YES | YES |
| SPCC18B5.11c  | SPAC17A5.11  | 0.9999722 | Known | NO  | YES | NO  | YES |
| SPAC17A5.02c  | SPAC23C11.11 | 0.9999722 | Known | NO  | NO  | NO  | NO  |
| SPBC725.02    | SPAC8C9.14   | 0.9999721 | Known | NO  | NO  | YES | YES |
| SPBC4B4.09    | SPAC19A8.13  | 0.9999721 | Known | YES | NO  | YES | NO  |
| SPBC11B10.09  | SPBC685.09   | 0.9999721 | Known | NO  | NO  | NO  | YES |
| SPBC16D10.09  | SPAC9E9.08   | 0.9999721 | Known | NO  | NO  | YES | YES |
| SPBC17F3.01c  | SPBC4F6.12   | 0.9999721 | Known | YES | NO  | NO  | NO  |
| SPCC18B5.03   | SPAC9E9.13   | 0.9999721 | Known | NO  | YES | NO  | YES |
| SPAC1952.07   | SPAC17H9.19c | 0.9999721 | Known | NO  | YES | YES | YES |
| SPAC9E9.07c   | SPCC895.07   | 0.999972  | Known | NO  | NO  | NO  | NO  |
| SPBC582.03    | SPBC25B2.05  | 0.999972  | Known | NO  | NO  | NO  | NO  |
| SPBC1718.07c  | SPAC17G6.04c | 0.9999718 | Known | NO  | YES | NO  | YES |
| SPAC9G1.11c   | SPBC16A3.01  | 0.9999718 | Known | YES | YES | YES | YES |
| SPCC553.07c   | SPAC20G4.04c | 0.9999717 | Known | NO  | YES | NO  | YES |
| SPBC16D10.09  | SPAC14C4.13  | 0.9999717 | Known | NO  | NO  | YES | YES |
| SPBC20F10.04c | SPAC11E3.08c | 0.9999717 | Known | YES | YES | YES | YES |
| SPAC12B10.07  | SPBC1778.06c | 0.9999716 | Known | YES | YES | YES | NO  |
| SPBC16D10.07c | SPAC664.01c  | 0.9999716 | Known | YES | NO  | YES | NO  |
| SPAC664.07c   | SPAC644.14c  | 0.9999716 | Known | NO  | YES | NO  | YES |

|               |               |           |       |     |     |     |     |
|---------------|---------------|-----------|-------|-----|-----|-----|-----|
| SPAC8E11.02c  | SPCC1322.08   | 0.9999716 | Known | YES | YES | NO  | YES |
| SPBC365.15    | SPBC20F10.06  | 0.9999716 | Known | NO  | YES | YES | YES |
| SPBC2A9.12    | SPBC1347.10   | 0.9999716 | Known | YES | NO  | YES | YES |
| SPAC821.06    | SPAC4F10.11   | 0.9999715 | Known | YES | YES | YES | YES |
| SPAC17A2.13c  | SPAC821.04c   | 0.9999715 | Known | NO  | NO  | NO  | YES |
| SPBC582.03    | SPBP16F5.02   | 0.9999715 | Known | NO  | YES | YES | YES |
| SPAC8E11.02c  | SPAC821.04c   | 0.9999715 | Known | YES | NO  | NO  | YES |
| SPBC1685.01   | SPBP4H10.04   | 0.9999715 | Known | NO  | NO  | YES | YES |
| SPAC1783.03   | SPBC21.01     | 0.9999715 | Known | YES | YES | YES | YES |
| SPCC1235.06   | SPAC3A11.05c  | 0.9999714 | Known | YES | NO  | NO  | YES |
| SPBC11B10.09  | SPBC887.10    | 0.9999714 | Known | NO  | YES | YES | YES |
| SPAC3G6.06c   | SPBC1921.02   | 0.9999714 | Known | NO  | YES | NO  | YES |
| SPBC3H7.13    | SPBC12D12.01  | 0.9999713 | Known | NO  | NO  | NO  | NO  |
| SPAC6F6.12    | SPCC364.02c   | 0.9999713 | Known | NO  | NO  | NO  | NO  |
| SPAC18G6.03   | SPAC17D4.03c  | 0.9999712 | Known | NO  | NO  | NO  | NO  |
| SPBC106.10    | SPBC14C8.01c  | 0.9999712 | Known | NO  | NO  | NO  | YES |
| SPBC725.02    | SPBC887.10    | 0.9999712 | Known | NO  | YES | YES | YES |
| SPBC543.07    | SPBC119.08    | 0.9999712 | Known | YES | YES | YES | YES |
| SPCC1223.11   | SPAC2G11.07c  | 0.9999712 | Known | YES | YES | YES | YES |
| SPAC22H12.02  | SPBC15D4.14   | 0.9999711 | Known | YES | NO  | YES | YES |
| SPAC17G6.14c  | SPBC16A3.05c  | 0.9999711 | Known | NO  | YES | NO  | YES |
| SPCC5E4.03c   | SPAC29E6.08   | 0.9999709 | Known | YES | NO  | YES | YES |
| SPCC1259.13   | SPAC4C5.04    | 0.9999709 | Known | NO  | NO  | NO  | YES |
| SPBC19C2.05   | SPAC1952.07   | 0.9999708 | Known | NO  | YES | NO  | YES |
| SPCC594.05c   | SPBC18H10.06c | 0.9999708 | Known | YES | NO  | YES | YES |
| SPBC354.03    | SPAC23H3.05c  | 0.9999708 | Known | YES | NO  | YES | YES |
| SPBC2A9.12    | SPBC14C8.07c  | 0.9999707 | Known | YES | NO  | YES | YES |
| SPCC1795.01c  | SPAC821.08c   | 0.9999707 | Known | YES | YES | YES | YES |
| SPBC646.09c   | SPBC4C3.07    | 0.9999707 | Known | YES | YES | NO  | YES |
| SPBC409.05    | SPCC1494.05c  | 0.9999707 | Known | NO  | NO  | NO  | YES |
| SPAC19D5.03   | SPBC1734.02c  | 0.9999706 | Known | NO  | NO  | NO  | YES |
| SPAC17G6.16c  | SPAC3G9.04    | 0.9999706 | Known | YES | NO  | NO  | YES |
| SPBC646.09c   | SPBC14C8.01c  | 0.9999706 | Known | NO  | NO  | YES | YES |
| SPCC18B5.11c  | SPBC25B2.05   | 0.9999706 | Known | NO  | NO  | NO  | YES |
| SPAC16.01     | SPBC336.12c   | 0.9999705 | Known | NO  | YES | NO  | NO  |
| SPBC4F6.15c   | SPBC19C7.09c  | 0.9999704 | Known | NO  | NO  | NO  | YES |
| SPBP19A11.06  | SPCC18.11c    | 0.9999704 | Known | YES | NO  | YES | YES |
| SPAC23A1.06c  | SPBC11B10.09  | 0.9999703 | Known | NO  | YES | YES | YES |
| SPAC2F7.11    | SPAC29B12.06c | 0.9999703 | Known | YES | YES | YES | NO  |
| SPCC1259.13   | SPBC14C8.01c  | 0.9999703 | Known | NO  | NO  | YES | YES |
| SPAC19B12.05c | SPAC23C4.15   | 0.9999703 | Known | NO  | YES | NO  | YES |
| SPBC530.14c   | SPBC11C11.08  | 0.9999702 | Known | NO  | YES | NO  | YES |
| SPAC1952.07   | SPAC26A3.02   | 0.9999702 | Known | NO  | YES | YES | YES |
| SPCC18B5.11c  | SPAC1952.07   | 0.9999702 | Known | NO  | YES | YES | YES |
| SPCC16C4.03   | SPCC18B5.03   | 0.9999701 | Known | NO  | NO  | NO  | YES |
| SPAC1952.07   | SPBC17D11.06  | 0.9999701 | Known | NO  | NO  | NO  | YES |
| SPAC17C9.05c  | SPBC31F10.04c | 0.9999701 | Known | YES | YES | YES | YES |

|               |              |           |       |     |     |     |     |
|---------------|--------------|-----------|-------|-----|-----|-----|-----|
| SPAPB2B4.03   | SPBC19F5.01c | 0.99997   | Known | NO  | YES | YES | YES |
| SPAC19E9.03   | SPBC19F5.01c | 0.99997   | Known | NO  | YES | YES | YES |
| SPAC6B12.15   | SPBC19C2.05  | 0.9999699 | Known | YES | YES | NO  | NO  |
| SPBC4.05      | SPBC26H8.07c | 0.9999699 | Known | NO  | NO  | NO  | YES |
| SPBC1718.07c  | SPAC18G6.07c | 0.9999699 | Known | NO  | NO  | NO  | YES |
| SPAC11H11.06  | SPBC14C8.06  | 0.9999699 | Known | YES | YES | YES | YES |
| SPCC1259.13   | SPBC11B10.09 | 0.9999698 | Known | NO  | YES | YES | YES |
| SPBC26H8.07c  | SPAC664.01c  | 0.9999698 | Known | NO  | NO  | NO  | YES |
| SPAC4D7.05    | SPBC4.07c    | 0.9999698 | Known | NO  | YES | NO  | YES |
| SPCC188.04c   | SPBC11C11.03 | 0.9999698 | Known | YES | YES | YES | YES |
| SPAC110.03    | SPBC1685.15c | 0.9999698 | Known | NO  | YES | NO  | YES |
| SPAC24B11.11c | SPCC970.04c  | 0.9999698 | Known | NO  | YES | YES | YES |
| SPBC14C8.01c  | SPAC821.08c  | 0.9999698 | Known | YES | NO  | YES | YES |
| SPAC29E6.08   | SPBC15D4.14  | 0.9999697 | Known | YES | NO  | YES | YES |
| SPCC794.09c   | SPBC776.18c  | 0.9999697 | Known | NO  | NO  | NO  | NO  |
| SPBC3H7.15    | SPAC23C4.12  | 0.9999697 | Known | YES | YES | YES | NO  |
| SPBC776.18c   | SPAC23A1.10  | 0.9999697 | Novel | NO  | NO  | NO  | NO  |
| SPBC839.15c   | SPBC776.18c  | 0.9999697 | Novel | NO  | NO  | NO  | NO  |
| SPBC12D12.01  | SPBC16A3.08c | 0.9999695 | Known | NO  | NO  | NO  | NO  |
| SPAC29A4.18   | SPAC23H4.12  | 0.9999695 | Known | YES | YES | YES | YES |
| SPBC409.09c   | SPAC27F1.04c | 0.9999694 | Known | YES | YES | YES | YES |
| SPBC543.07    | SPCC757.09c  | 0.9999693 | Known | NO  | NO  | YES | YES |
| SPBC11B10.09  | SPAC821.08c  | 0.9999693 | Known | NO  | YES | YES | YES |
| SPAC8E11.02c  | SPAC1782.09c | 0.9999692 | Known | YES | YES | YES | YES |
| SPAC24B11.11c | SPBC24C6.07  | 0.9999692 | Known | YES | YES | YES | YES |
| SPAC20H4.07   | SPBC1921.02  | 0.9999692 | Known | NO  | NO  | YES | YES |
| SPCC4F11.02   | SPAC2G11.07c | 0.9999691 | Known | YES | YES | YES | YES |
| SPAC1783.03   | SPBP22H7.09c | 0.9999691 | Known | YES | YES | YES | YES |
| SPAC31G5.13   | SPAC6G9.08   | 0.9999691 | Known | NO  | NO  | YES | YES |
| SPBC800.05c   | SPAC23H3.08c | 0.9999691 | Known | NO  | NO  | NO  | YES |
| SPAC821.05    | SPAC1751.03  | 0.9999691 | Known | YES | YES | YES | YES |
| SPAC19E9.02   | SPBC20F10.06 | 0.9999691 | Known | NO  | YES | NO  | YES |
| SPAC17H9.09c  | SPAC222.10c  | 0.999969  | Known | NO  | NO  | NO  | NO  |
| SPAC19G12.01c | SPBC20F10.06 | 0.9999689 | Known | NO  | YES | NO  | YES |
| SPBC582.03    | SPBC11B10.09 | 0.9999689 | Known | NO  | YES | YES | YES |
| SPBC800.05c   | SPAC30C2.02  | 0.9999689 | Known | NO  | NO  | YES | NO  |
| SPAC1782.09c  | SPAC17G8.10c | 0.9999689 | Known | YES | NO  | NO  | YES |
| SPAC22H12.02  | SPBC3B8.09   | 0.9999688 | Known | NO  | NO  | NO  | NO  |
| SPBC18H10.06c | SPAC23H3.05c | 0.9999688 | Known | YES | NO  | YES | YES |
| SPAC17H9.09c  | SPBC1D7.05   | 0.9999688 | Known | NO  | NO  | YES | YES |
| SPAC18G6.15   | SPAC3C7.12   | 0.9999687 | Known | YES | YES | YES | YES |
| SPBC2F12.11c  | SPAC22F3.09c | 0.9999687 | Known | YES | YES | YES | YES |
| SPAC644.14c   | SPBC1734.06  | 0.9999686 | Known | YES | YES | NO  | YES |
| SPCC285.09c   | SPBC646.13   | 0.9999686 | Known | NO  | NO  | YES | YES |
| SPAC110.03    | SPAC24H6.09  | 0.9999685 | Known | YES | YES | YES | YES |
| SPBC24C6.07   | SPAC2F3.15   | 0.9999685 | Known | NO  | NO  | NO  | YES |
| SPBC18H10.03  | SPBC646.09c  | 0.9999685 | Known | YES | YES | NO  | YES |

|               |               |           |       |     |     |     |     |
|---------------|---------------|-----------|-------|-----|-----|-----|-----|
| SPBC2D10.12   | SPBC337.08c   | 0.9999684 | Known | NO  | NO  | YES | NO  |
| SPAC9G1.09    | SPAC6F6.08c   | 0.9999684 | Known | YES | YES | NO  | YES |
| SPAC1F7.03    | SPAC1F7.04    | 0.9999684 | Known | NO  | YES | YES | NO  |
| SPBC2A9.12    | SPBC685.09    | 0.9999684 | Known | YES | YES | YES | YES |
| SPAC23G3.01   | SPBC14C8.12   | 0.9999683 | Known | NO  | YES | YES | YES |
| SPAC3A12.13c  | SPBC12D12.01  | 0.9999683 | Known | NO  | NO  | NO  | NO  |
| SPCC16A11.05c | SPCC1739.11c  | 0.9999683 | Known | NO  | NO  | NO  | YES |
| SPAC57A10.10c | SPBC19C2.05   | 0.9999682 | Known | NO  | NO  | NO  | NO  |
| SPAC1D4.13    | SPBC1718.07c  | 0.9999681 | Known | NO  | YES | NO  | YES |
| SPAC1952.13   | SPBC1289.03c  | 0.9999681 | Known | NO  | YES | YES | YES |
| SPAC16A10.06c | SPAC11E3.08c  | 0.9999679 | Known | YES | YES | YES | YES |
| SPAC18G6.15   | SPBC800.05c   | 0.9999678 | Known | NO  | NO  | YES | YES |
| SPBC9B6.10    | SPBC11B10.09  | 0.9999678 | Known | NO  | YES | YES | YES |
| SPAC24B11.11c | SPBC32F12.09  | 0.9999678 | Known | NO  | NO  | NO  | NO  |
| SPBC28F2.04c  | SPAC644.12    | 0.9999677 | Known | YES | YES | YES | YES |
| SPAC23G3.01   | SPAC3A12.07   | 0.9999677 | Known | YES | YES | YES | YES |
| SPAC21E11.03c | SPCC736.11    | 0.9999677 | Known | NO  | NO  | NO  | YES |
| SPAC664.07c   | SPAC1952.07   | 0.9999677 | Known | YES | YES | YES | YES |
| SPBC2F12.11c  | SPBC725.16    | 0.9999676 | Known | YES | YES | YES | YES |
| SPBC428.13c   | SPAC222.10c   | 0.9999676 | Known | YES | YES | NO  | YES |
| SPBC3D6.04c   | SPBC20F10.06  | 0.9999676 | Known | YES | YES | YES | NO  |
| SPBC21.06c    | SPAC20G4.06c  | 0.9999675 | Known | NO  | NO  | NO  | YES |
| SPAC630.13c   | SPBC839.17c   | 0.9999674 | Known | NO  | NO  | NO  | YES |
| SPBC36.05c    | SPAC23H4.12   | 0.9999674 | Known | YES | YES | YES | YES |
| SPCC576.08c   | SPBC8D2.10c   | 0.9999674 | Known | YES | NO  | NO  | NO  |
| SPAC637.10c   | SPBC29B5.01   | 0.9999674 | Known | NO  | NO  | NO  | YES |
| SPCC1682.02c  | SPBC409.05    | 0.9999673 | Known | NO  | NO  | NO  | NO  |
| SPBC354.03    | SPBC18H10.06c | 0.9999672 | Known | YES | NO  | YES | YES |
| SPBC336.01    | SPBC409.05    | 0.9999672 | Known | NO  | YES | NO  | NO  |
| SPBC119.14    | SPAC644.14c   | 0.9999672 | Known | NO  | YES | YES | YES |
| SPCC18.04     | SPBC409.05    | 0.999967  | Known | NO  | YES | YES | NO  |
| SPBC16G5.01   | SPBC646.09c   | 0.9999669 | Known | NO  | NO  | NO  | YES |
| SPAC20H4.07   | SPAC3G6.06c   | 0.9999669 | Known | NO  | YES | NO  | YES |
| SPBC409.04c   | SPBC1105.04c  | 0.9999669 | Known | NO  | YES | YES | NO  |
| SPBC4.07c     | SPBC409.06    | 0.9999668 | Known | NO  | NO  | NO  | YES |
| SPBC36.06c    | SPAC17G6.04c  | 0.9999668 | Known | NO  | YES | NO  | NO  |
| SPAC1687.20c  | SPBC20F10.06  | 0.9999667 | Known | NO  | YES | NO  | YES |
| SPBC3D6.09    | SPAC23C4.18c  | 0.9999667 | Known | YES | YES | YES | YES |
| SPAC6F12.15c  | SPBC20F10.06  | 0.9999667 | Known | NO  | YES | NO  | YES |
| SPAC664.01c   | SPAC17G8.13c  | 0.9999666 | Known | NO  | NO  | NO  | YES |
| SPAC25B8.14   | SPBC21.01     | 0.9999666 | Known | YES | YES | YES | YES |
| SPCC16C4.07   | SPBC24C6.07   | 0.9999666 | Known | NO  | NO  | NO  | YES |
| SPCC1259.13   | SPAC17A2.13c  | 0.9999666 | Known | NO  | YES | YES | YES |
| SPCC1259.13   | SPAC8E11.02c  | 0.9999666 | Known | YES | YES | YES | YES |
| SPBC24C6.07   | SPBP4H10.04   | 0.9999665 | Known | NO  | NO  | NO  | YES |
| SPBC13G1.13   | SPBC30B4.07c  | 0.9999664 | Known | YES | YES | YES | NO  |
| SPBC14F5.08   | SPAC23H4.17c  | 0.9999664 | Known | YES | NO  | YES | YES |

|               |                |           |       |     |     |     |     |
|---------------|----------------|-----------|-------|-----|-----|-----|-----|
| SPAC29A4.02c  | SPAC1952.07    | 0.9999663 | Known | NO  | NO  | NO  | YES |
| SPAC20G4.04c  | SPAC26A3.02    | 0.9999662 | Known | NO  | YES | YES | YES |
| SPAC17H9.09c  | SPBC21.05c     | 0.9999662 | Known | NO  | NO  | YES | YES |
| SPAC4D7.05    | SPAC1751.03    | 0.9999662 | Known | YES | YES | YES | YES |
| SPAC17D4.02   | SPBC3D6.09     | 0.9999662 | Known | YES | YES | YES | YES |
| SPBC17D11.06  | SPAC20G4.04c   | 0.9999661 | Known | NO  | NO  | NO  | YES |
| SPCC1235.06   | SPBC12D12.01   | 0.9999661 | Known | YES | YES | NO  | YES |
| SPBC32F12.09  | SPBC14C8.07c   | 0.999966  | Known | NO  | NO  | NO  | YES |
| SPAC3G6.06c   | SPAC17A5.11    | 0.999966  | Known | NO  | YES | NO  | YES |
| SPBC9B6.04c   | SPBC800.07c    | 0.999966  | Known | YES | YES | YES | NO  |
| SPAC589.08c   | SPBC2F12.13    | 0.999966  | Known | YES | NO  | NO  | YES |
| SPCC777.14    | SPBC11C11.08   | 0.9999659 | Known | NO  | NO  | YES | NO  |
| SPAC17C9.13c  | SPBC646.09c    | 0.9999659 | Known | NO  | NO  | YES | YES |
| SPAC1687.13c  | SPAPB17E12.04c | 0.9999658 | Known | YES | NO  | YES | NO  |
| SPAC1F7.04    | SPBC1604.14c   | 0.9999658 | Known | YES | YES | YES | NO  |
| SPBC2D10.12   | SPAC26A3.16    | 0.9999658 | Known | NO  | YES | YES | YES |
| SPCC330.11    | SPAC23H4.18c   | 0.9999658 | Known | NO  | YES | NO  | YES |
| SPBC21.04     | SPBC4C3.12     | 0.9999657 | Known | NO  | NO  | NO  | YES |
| SPBC16D10.09  | SPAC8F11.07c   | 0.9999656 | Known | YES | YES | NO  | YES |
| SPAC24B11.06c | SPBC1A4.02c    | 0.9999656 | Known | NO  | NO  | NO  | YES |
| SPAC20H4.07   | SPAC644.14c    | 0.9999655 | Known | NO  | YES | YES | YES |
| SPAC222.15    | SPAC14C4.13    | 0.9999654 | Known | YES | NO  | NO  | YES |
| SPAC222.10c   | SPAC1565.06c   | 0.9999654 | Known | YES | YES | YES | YES |
| SPCC1620.09c  | SPAC22H12.02   | 0.9999654 | Known | YES | YES | YES | YES |
| SPAC24H6.05   | SPBC2F12.11c   | 0.9999653 | Known | NO  | NO  | NO  | YES |
| SPAC17G6.16c  | SPAC227.08c    | 0.9999653 | Known | YES | YES | YES | YES |
| SPAC2F7.03c   | SPAC4A8.15c    | 0.9999653 | Known | NO  | NO  | NO  | YES |
| SPBC19G7.16   | SPBC14C8.01c   | 0.9999653 | Known | YES | NO  | NO  | YES |
| SPBC1685.11   | SPAC20H4.07    | 0.9999653 | Known | NO  | NO  | YES | NO  |
| SPAC17A5.02c  | SPAC8E11.02c   | 0.9999653 | Known | NO  | NO  | NO  | NO  |
| SPCC1223.11   | SPCC4F11.02    | 0.9999653 | Known | YES | YES | YES | YES |
| SPCC1259.13   | SPBC16D10.09   | 0.9999652 | Known | NO  | YES | YES | YES |
| SPAC24H6.05   | SPAC16E8.15    | 0.9999652 | Known | NO  | NO  | NO  | NO  |
| SPBC244.01c   | SPAC1565.06c   | 0.9999651 | Known | YES | YES | YES | YES |
| SPAC1786.03   | SPBC1289.03c   | 0.9999651 | Known | NO  | NO  | NO  | NO  |
| SPAC3C7.03c   | SPAC644.14c    | 0.9999651 | Known | NO  | YES | YES | YES |
| SPBC24C6.07   | SPAC1782.09c   | 0.9999651 | Known | YES | YES | YES | YES |
| SPBC409.09c   | SPAC1687.15    | 0.9999649 | Known | NO  | NO  | NO  | YES |
| SPAC17H9.09c  | SPAC1F5.09c    | 0.9999649 | Known | NO  | NO  | NO  | YES |
| SPAC17C9.13c  | SPAC821.08c    | 0.9999649 | Known | NO  | NO  | NO  | YES |
| SPBC24C6.07   | SPAC6G10.12c   | 0.9999648 | Known | NO  | NO  | NO  | YES |
| SPBC6B1.07    | SPAC26A3.08    | 0.9999648 | Known | YES | NO  | YES | YES |
| SPBC32F12.09  | SPAC144.13c    | 0.9999647 | Known | NO  | NO  | YES | YES |
| SPAC23D3.02   | SPBC1734.02c   | 0.9999647 | Known | NO  | NO  | NO  | NO  |
| SPAC31G5.09c  | SPAC1D4.13     | 0.9999647 | Known | NO  | YES | YES | NO  |
| SPAC8E11.02c  | SPBC19C2.05    | 0.9999647 | Known | YES | YES | NO  | YES |
| SPBC3B9.11c   | SPAC824.04     | 0.9999646 | Known | YES | NO  | YES | YES |



|               |               |           |       |     |     |     |     |
|---------------|---------------|-----------|-------|-----|-----|-----|-----|
| SPCC622.08c   | SPAC694.06c   | 0.9999646 | Known | NO  | YES | NO  | YES |
| SPAC17A5.11   | SPAC644.14c   | 0.9999645 | Known | NO  | YES | YES | YES |
| SPBC32C12.02  | SPAC8E11.02c  | 0.9999645 | Known | NO  | NO  | NO  | YES |
| SPAC821.06    | SPAC9G1.11c   | 0.9999645 | Known | YES | YES | YES | YES |
| SPBC16G5.01   | SPAC6G9.08    | 0.9999644 | Known | NO  | NO  | YES | YES |
| SPAC3H8.10    | SPAC22H10.12c | 0.9999644 | Known | YES | NO  | NO  | NO  |
| SPAC24B11.11c | SPBC428.13c   | 0.9999644 | Known | YES | YES | NO  | YES |
| SPAC1687.13c  | SPBC17D11.01  | 0.9999644 | Known | YES | NO  | YES | YES |
| SPAC13A11.03  | SPAC14C4.13   | 0.9999643 | Known | YES | NO  | NO  | YES |
| SPCC1259.13   | SPCC1672.02c  | 0.9999643 | Known | NO  | NO  | NO  | YES |
| SPAC19G12.06c | SPAC694.06c   | 0.9999643 | Known | NO  | YES | NO  | YES |
| SPCC663.12    | SPBC1734.02c  | 0.9999643 | Known | NO  | NO  | NO  | NO  |
| SPAC22E12.06c | SPCC736.04c   | 0.9999641 | Known | YES | YES | YES | NO  |
| SPAC20H4.07   | SPAC3C7.03c   | 0.9999639 | Known | YES | YES | YES | YES |
| SPAC24B11.06c | SPBC2F12.09c  | 0.9999639 | Known | NO  | NO  | NO  | YES |
| SPBC106.20    | SPAC23C4.08   | 0.9999639 | Known | NO  | YES | NO  | YES |
| SPCC1753.03c  | SPAC644.14c   | 0.9999639 | Known | YES | NO  | NO  | NO  |
| SPAC8E11.02c  | SPCC18B5.11c  | 0.9999639 | Known | YES | YES | NO  | YES |
| SPBC1709.01   | SPAP8A3.08    | 0.9999639 | Known | YES | YES | YES | YES |
| SPAC17H9.10c  | SPAC29B12.03  | 0.9999638 | Known | NO  | NO  | YES | YES |
| SPAC110.03    | SPBC1604.14c  | 0.9999638 | Known | YES | YES | YES | YES |
| SPBC12D12.01  | SPAC688.04c   | 0.9999638 | Known | NO  | NO  | NO  | NO  |
| SPBC1105.11c  | SPAC18G6.02c  | 0.9999637 | Novel | NO  | YES | YES | YES |
| SPAC18G6.02c  | SPAC1834.04   | 0.9999637 | Known | NO  | YES | YES | YES |
| SPBC8D2.04    | SPAC18G6.02c  | 0.9999637 | Known | NO  | YES | YES | YES |
| SPAC56F8.05c  | SPAC13D6.01   | 0.9999636 | Known | NO  | NO  | NO  | NO  |
| SPAC4C5.04    | SPAC23C4.12   | 0.9999636 | Known | NO  | NO  | NO  | NO  |
| SPBC3D6.09    | SPBC1347.10   | 0.9999635 | Known | YES | YES | YES | YES |
| SPAC637.07    | SPAC17H9.09c  | 0.9999635 | Known | NO  | NO  | YES | YES |
| SPCC285.09c   | SPAC23H3.13c  | 0.9999635 | Known | NO  | NO  | NO  | YES |
| SPBC1718.07c  | SPAC6F6.08c   | 0.9999635 | Known | NO  | YES | YES | YES |
| SPAC24B11.11c | SPAC23C4.08   | 0.9999634 | Known | NO  | YES | NO  | YES |
| SPCC622.09    | SPCC11E10.08  | 0.9999634 | Known | NO  | YES | NO  | YES |
| SPBC6B1.07    | SPCC16A11.05c | 0.9999633 | Known | YES | NO  | YES | NO  |
| SPBC11B10.09  | SPAC19E9.03   | 0.9999633 | Known | NO  | YES | YES | YES |
| SPBC11B10.09  | SPAPB2B4.03   | 0.9999633 | Known | NO  | YES | YES | YES |
| SPBC21.01     | SPBC18E5.03c  | 0.9999633 | Known | YES | YES | YES | YES |
| SPAC27F1.04c  | SPBC18E5.03c  | 0.9999633 | Known | NO  | YES | YES | YES |
| SPBC20F10.04c | SPBC1921.02   | 0.9999632 | Known | NO  | YES | YES | YES |
| SPCC622.17    | SPAC30D11.07  | 0.9999631 | Known | NO  | YES | YES | YES |
| SPAC29A4.02c  | SPBC11B10.09  | 0.9999631 | Known | NO  | NO  | NO  | YES |
| SPAC1751.03   | SPBC4C3.07    | 0.9999631 | Known | YES | YES | YES | YES |
| SPAC8E11.03c  | SPAC644.14c   | 0.9999631 | Known | YES | YES | YES | YES |
| SPBC336.08    | SPBC11C11.03  | 0.9999631 | Known | YES | YES | YES | YES |
| SPAC24B11.06c | SPCC4F11.02   | 0.9999631 | Known | NO  | NO  | YES | YES |
| SPAC24B11.11c | SPAC16A10.04  | 0.999963  | Known | NO  | NO  | NO  | YES |
| SPBC11B10.09  | SPBC646.13    | 0.999963  | Known | NO  | YES | YES | NO  |

|               |               |           |       |     |     |     |     |
|---------------|---------------|-----------|-------|-----|-----|-----|-----|
| SPAC637.10c   | SPBC646.09c   | 0.999963  | Known | NO  | NO  | NO  | YES |
| SPACUNK4.06c  | SPAC19B12.05c | 0.9999629 | Known | NO  | YES | NO  | YES |
| SPAC6B12.15   | SPCC364.02c   | 0.9999629 | Known | NO  | NO  | NO  | NO  |
| SPAC24B11.11c | SPAC1F7.04    | 0.9999628 | Known | NO  | YES | NO  | YES |
| SPBC1718.01   | SPBC409.05    | 0.9999627 | Known | YES | YES | NO  | YES |
| SPCC550.05    | SPAC11E3.08c  | 0.9999627 | Known | YES | YES | YES | YES |
| SPAC644.14c   | SPCC645.04    | 0.9999626 | Known | NO  | YES | YES | YES |
| SPBC2A9.12    | SPBC646.14c   | 0.9999626 | Known | YES | YES | YES | YES |
| SPBC16D10.09  | SPAC27E2.05   | 0.9999625 | Known | YES | YES | YES | YES |
| SPBC3D6.09    | SPBC14C8.07c  | 0.9999625 | Known | YES | NO  | YES | YES |
| SPBC16D10.09  | SPAC26A3.02   | 0.9999625 | Known | NO  | YES | YES | YES |
| SPAC24H6.06   | SPBC725.13c   | 0.9999624 | Known | NO  | NO  | YES | YES |
| SPBC32H8.12c  | SPBC776.18c   | 0.9999624 | Known | NO  | NO  | NO  | NO  |
| SPAC1420.03   | SPBC16G5.01   | 0.9999624 | Known | NO  | NO  | YES | YES |
| SPBC16G5.01   | SPAPB8E5.02c  | 0.9999624 | Novel | NO  | NO  | YES | YES |
| SPCC18B5.11c  | SPBC16D10.09  | 0.9999624 | Known | NO  | YES | NO  | YES |
| SPAC17G6.12   | SPBC409.05    | 0.9999623 | Known | YES | NO  | YES | YES |
| SPCC188.11    | SPAP8A3.06    | 0.9999623 | Known | NO  | NO  | YES | NO  |
| SPAC13D6.05   | SPAC22H10.10  | 0.9999622 | Known | YES | YES | YES | YES |
| SPAC18G6.03   | SPBP4H10.04   | 0.9999621 | Known | NO  | NO  | NO  | NO  |
| SPCC16C4.11   | SPAC19E9.03   | 0.9999621 | Known | NO  | YES | YES | NO  |
| SPBC1105.11c  | SPCC306.04c   | 0.9999621 | Known | NO  | NO  | NO  | NO  |
| SPAC1834.04   | SPCC306.04c   | 0.9999621 | Novel | NO  | NO  | NO  | NO  |
| SPBC8D2.04    | SPCC306.04c   | 0.9999621 | Known | NO  | NO  | NO  | NO  |
| SPAPB24D3.04c | SPBC3D6.10    | 0.999962  | Known | NO  | NO  | YES | YES |
| SPAC824.04    | SPAC22G7.10   | 0.999962  | Known | YES | NO  | YES | YES |
| SPCC1739.12   | SPAC1687.15   | 0.999962  | Known | NO  | NO  | YES | YES |
| SPAC1952.07   | SPAC644.14c   | 0.999962  | Known | NO  | YES | NO  | YES |
| SPAC8E11.03c  | SPAC20H4.07   | 0.9999619 | Known | NO  | YES | YES | YES |
| SPBC4F6.15c   | SPAC30D11.10  | 0.9999619 | Known | NO  | YES | NO  | NO  |
| SPAC22H12.02  | SPCC1529.01   | 0.9999618 | Known | NO  | NO  | NO  | NO  |
| SPBC1685.01   | SPBC119.08    | 0.9999617 | Known | YES | YES | YES | YES |
| SPBC1685.15c  | SPAC589.08c   | 0.9999616 | Known | YES | NO  | NO  | YES |
| SPAC1F8.06    | SPAC25B8.14   | 0.9999615 | Known | YES | NO  | NO  | YES |
| SPAC22F3.02   | SPBC29B5.01   | 0.9999615 | Known | NO  | YES | YES | NO  |
| SPBC1921.03c  | SPBC1D7.04    | 0.9999615 | Known | NO  | YES | YES | YES |
| SPBC20F10.04c | SPBC651.10    | 0.9999614 | Known | YES | YES | YES | YES |
| SPCC364.02c   | SPAC644.04    | 0.9999614 | Known | NO  | NO  | NO  | NO  |
| SPAC8E11.03c  | SPAC3C7.03c   | 0.9999614 | Known | NO  | YES | YES | YES |
| SPCC16C4.07   | SPBC428.13c   | 0.9999614 | Known | NO  | NO  | NO  | YES |
| SPBP8B7.14c   | SPAC17G8.03c  | 0.9999614 | Known | YES | YES | NO  | NO  |
| SPBC20F10.04c | SPBC1734.06   | 0.9999613 | Known | YES | NO  | NO  | YES |
| SPBC428.13c   | SPBP4H10.04   | 0.9999613 | Known | YES | NO  | NO  | YES |
| SPBC725.13c   | SPAC23C4.18c  | 0.9999612 | Known | NO  | NO  | YES | YES |
| SPAC22A12.05  | SPAC4G9.08c   | 0.9999612 | Known | YES | YES | NO  | NO  |
| SPAC13C5.07   | SPBC21B10.12  | 0.9999611 | Known | NO  | NO  | YES | YES |
| SPBC557.03c   | SPBC1289.03c  | 0.999961  | Known | NO  | NO  | YES | YES |

|               |               |           |       |     |     |     |     |
|---------------|---------------|-----------|-------|-----|-----|-----|-----|
| SPCC1259.15c  | SPAC6F12.15c  | 0.9999609 | Known | NO  | NO  | YES | YES |
| SPCC622.08c   | SPCC1183.05c  | 0.9999608 | Known | NO  | NO  | NO  | YES |
| SPCC5E4.03c   | SPCC1259.15c  | 0.9999607 | Known | NO  | NO  | NO  | YES |
| SPAC22E12.16c | SPAP8A3.08    | 0.9999606 | Known | NO  | YES | NO  | NO  |
| SPAC3G6.06c   | SPBC20F10.04c | 0.9999606 | Known | YES | YES | NO  | YES |
| SPBC409.04c   | SPAC27F1.04c  | 0.9999605 | Known | YES | YES | YES | YES |
| SPAC19G12.06c | SPCC1183.05c  | 0.9999605 | Known | NO  | NO  | NO  | YES |
| SPCC970.04c   | SPAC821.12    | 0.9999605 | Known | NO  | YES | YES | NO  |
| SPBC428.13c   | SPCC188.02    | 0.9999604 | Known | YES | NO  | NO  | YES |
| SPAP27G11.15  | SPAC688.06c   | 0.9999603 | Known | YES | YES | YES | YES |
| SPBC18E5.03c  | SPBP22H7.09c  | 0.9999603 | Known | YES | YES | YES | YES |
| SPAC6G9.08    | SPAC637.10c   | 0.9999601 | Known | NO  | NO  | YES | YES |
| SPAC3H1.12c   | SPCC18.11c    | 0.99996   | Known | YES | NO  | YES | YES |
| SPAC9G1.09    | SPBC24C6.07   | 0.99996   | Known | YES | YES | YES | YES |
| SPAC17G6.04c  | SPAPB1A10.04c | 0.9999599 | Known | NO  | YES | NO  | NO  |
| SPAC1D4.06c   | SPAC644.14c   | 0.9999597 | Known | NO  | YES | NO  | YES |
| SPCC1442.10c  | SPBC14F5.08   | 0.9999597 | Known | NO  | NO  | NO  | YES |
| SPAC824.04    | SPBC776.02c   | 0.9999597 | Known | YES | NO  | NO  | YES |
| SPBC428.13c   | SPAC1782.09c  | 0.9999596 | Known | YES | YES | YES | YES |
| SPAC22H12.02  | SPAC25H1.02   | 0.9999595 | Known | YES | NO  | YES | NO  |
| SPAC19G12.12  | SPBPJ4664.01  | 0.9999595 | Known | YES | YES | YES | NO  |
| SPAC110.03    | SPAC1F5.09c   | 0.9999594 | Known | NO  | YES | NO  | YES |
| SPBC3D6.09    | SPBC685.09    | 0.9999594 | Known | YES | NO  | YES | YES |
| SPAC17G8.09   | SPCC306.04c   | 0.9999593 | Known | YES | NO  | YES | YES |
| SPBC428.13c   | SPAC6G10.12c  | 0.9999593 | Known | NO  | NO  | NO  | YES |
| SPBC1685.01   | SPCC757.09c   | 0.9999593 | Known | NO  | YES | YES | YES |
| SPBC146.07    | SPAP8A3.06    | 0.9999592 | Known | YES | NO  | YES | YES |
| SPAC664.07c   | SPBC16D10.09  | 0.9999592 | Known | NO  | YES | YES | YES |
| SPAC24H6.03   | SPBC119.02    | 0.9999592 | Known | NO  | NO  | NO  | NO  |
| SPCC1259.15c  | SPBC15D4.14   | 0.9999591 | Known | NO  | NO  | NO  | YES |
| SPCC1672.06c  | SPAC4A8.15c   | 0.9999591 | Known | NO  | NO  | NO  | NO  |
| SPBC582.03    | SPBC32F12.09  | 0.9999591 | Known | NO  | NO  | NO  | YES |
| SPBC649.03    | SPAC3G6.06c   | 0.999959  | Known | NO  | NO  | NO  | YES |
| SPAC4D7.03    | SPBC409.05    | 0.9999588 | Known | NO  | YES | NO  | YES |
| SPCC16C4.07   | SPAC1565.06c  | 0.9999588 | Known | NO  | NO  | NO  | YES |
| SPBC28F2.07   | SPAC644.14c   | 0.9999587 | Known | NO  | YES | YES | YES |
| SPBP4H10.04   | SPAC1565.06c  | 0.9999587 | Known | NO  | NO  | NO  | YES |
| SPAC17H9.09c  | SPBC646.09c   | 0.9999585 | Known | NO  | NO  | YES | YES |
| SPBC776.02c   | SPAC4A8.12c   | 0.9999585 | Known | YES | NO  | NO  | NO  |
| SPAC1D4.06c   | SPAC20H4.07   | 0.9999584 | Known | NO  | YES | NO  | YES |
| SPBC4.07c     | SPAC637.10c   | 0.9999584 | Known | YES | NO  | YES | YES |
| SPBC32H8.07   | SPAC23H3.13c  | 0.9999583 | Known | YES | YES | YES | YES |
| SPBP16F5.02   | SPBC19F8.07   | 0.9999582 | Known | YES | NO  | YES | YES |
| SPCC4G3.05c   | SPBC30D10.04  | 0.9999581 | Known | YES | YES | NO  | YES |
| SPAC227.16c   | SPAC24H6.06   | 0.9999581 | Known | NO  | NO  | YES | YES |
| SPBC21.04     | SPBC31F10.04c | 0.999958  | Known | YES | YES | NO  | YES |
| SPBC409.05    | SPBP4H10.11c  | 0.999958  | Known | NO  | NO  | NO  | NO  |

|               |               |           |       |     |     |     |     |
|---------------|---------------|-----------|-------|-----|-----|-----|-----|
| SPBC776.02c   | SPBC25B2.05   | 0.9999578 | Known | NO  | NO  | NO  | NO  |
| SPAC110.03    | SPAC637.07    | 0.9999578 | Known | NO  | YES | NO  | YES |
| SPCC188.02    | SPAC1565.06c  | 0.9999578 | Known | NO  | NO  | NO  | YES |
| SPBC776.18c   | SPBC19F8.07   | 0.9999577 | Known | YES | NO  | NO  | YES |
| SPAC644.12    | SPAC26A3.08   | 0.9999577 | Known | YES | NO  | YES | YES |
| SPAC1F8.06    | SPBC18E5.03c  | 0.9999576 | Known | YES | NO  | NO  | YES |
| SPAC1783.03   | SPAC25B8.14   | 0.9999576 | Known | YES | YES | YES | YES |
| SPBC660.14    | SPAC9E9.13    | 0.9999574 | Known | NO  | NO  | NO  | YES |
| SPBC336.09c   | SPBC725.17c   | 0.9999573 | Known | YES | YES | YES | NO  |
| SPAC13D6.05   | SPBC16A3.15c  | 0.9999573 | Known | NO  | NO  | NO  | YES |
| SPBC24C6.11   | SPAC644.12    | 0.9999573 | Known | YES | NO  | YES | NO  |
| SPCC31H12.05c | SPBC776.02c   | 0.9999571 | Known | NO  | YES | YES | NO  |
| SPAC31G5.11   | SPBC800.05c   | 0.9999569 | Known | NO  | NO  | NO  | NO  |
| SPAC20G4.04c  | SPAC644.14c   | 0.9999569 | Known | NO  | YES | NO  | YES |
| SPAC1782.09c  | SPAC1565.06c  | 0.9999569 | Known | YES | YES | YES | YES |
| SPAC3C7.03c   | SPBC28F2.07   | 0.9999568 | Known | NO  | NO  | YES | YES |
| SPAC227.16c   | SPAC23C4.18c  | 0.9999567 | Known | NO  | NO  | YES | YES |
| SPAC27F1.02c  | SPBC11C11.02  | 0.9999567 | Known | YES | NO  | YES | YES |
| SPAC13D6.05   | SPBC800.05c   | 0.9999567 | Known | NO  | NO  | NO  | YES |
| SPCC188.04c   | SPAC27F1.04c  | 0.9999567 | Known | YES | YES | YES | YES |
| SPAC2E1P5.04c | SPAPB1A10.04c | 0.9999567 | Known | YES | YES | YES | NO  |
| SPCC736.14    | SPCC622.09    | 0.9999567 | Known | NO  | NO  | NO  | YES |
| SPAC13D6.05   | SPBC26H8.07c  | 0.9999566 | Known | NO  | NO  | NO  | YES |
| SPAC6G10.12c  | SPAC1565.06c  | 0.9999565 | Known | NO  | NO  | NO  | YES |
| SPAC222.09    | SPACUNK4.06c  | 0.9999565 | Known | NO  | YES | NO  | NO  |
| SPAC24B11.06c | SPBC11B10.09  | 0.9999564 | Known | NO  | YES | YES | YES |
| SPBC1703.06   | SPBC409.05    | 0.9999562 | Known | NO  | YES | NO  | NO  |
| SPAC227.16c   | SPAC17D4.02   | 0.999956  | Known | NO  | NO  | YES | YES |
| SPBP35G2.03c  | SPBC16H5.07c  | 0.999956  | Known | NO  | NO  | NO  | YES |
| SPCPIE11.07c  | SPAC644.12    | 0.9999559 | Known | YES | NO  | YES | NO  |
| SPAC17C9.05c  | SPBC14F5.08   | 0.9999559 | Known | YES | NO  | YES | YES |
| SPAC1D4.06c   | SPBC19F8.07   | 0.9999559 | Known | NO  | YES | YES | YES |
| SPBP16F5.02   | SPBC776.18c   | 0.9999559 | Known | YES | YES | YES | YES |
| SPAC18B11.10  | SPAC21E11.03c | 0.9999558 | Known | YES | NO  | YES | YES |
| SPAC17H9.09c  | SPBC19C2.05   | 0.9999557 | Known | NO  | NO  | NO  | NO  |
| SPBC28F2.12   | SPAC1B3.12c   | 0.9999556 | Known | NO  | YES | YES | YES |
| SPCC16C4.03   | SPAC24H6.05   | 0.9999556 | Known | NO  | NO  | YES | YES |
| SPAC23H4.18c  | SPCC11E10.08  | 0.9999555 | Known | NO  | NO  | NO  | YES |
| SPBC32F12.06  | SPBC11B10.09  | 0.9999555 | Known | NO  | YES | NO  | NO  |
| SPAC110.03    | SPAC22H10.07  | 0.9999553 | Known | YES | YES | YES | YES |
| SPAC17C9.13c  | SPBC1734.06   | 0.9999553 | Known | NO  | NO  | YES | YES |
| SPBC3B9.07c   | SPAC18G6.11c  | 0.9999552 | Known | NO  | NO  | YES | YES |
| SPBC543.07    | SPBC1685.01   | 0.9999551 | Known | YES | NO  | YES | YES |
| SPAC18B11.07c | SPCC1919.15   | 0.999955  | Known | YES | YES | YES | NO  |
| SPAC589.08c   | SPAC1687.20c  | 0.999955  | Known | YES | NO  | NO  | YES |
| SPBC12D12.01  | SPAC1565.06c  | 0.9999549 | Known | YES | YES | NO  | YES |
| SPAC16.02c    | SPBC11C11.08  | 0.9999548 | Known | NO  | YES | NO  | YES |

|               |               |           |       |     |     |     |     |
|---------------|---------------|-----------|-------|-----|-----|-----|-----|
| SPAC6B12.11   | SPBC11B10.09  | 0.9999548 | Known | NO  | YES | YES | NO  |
| SPBC409.04c   | SPAC1687.15   | 0.9999547 | Known | NO  | NO  | NO  | YES |
| SPBC32F12.11  | SPCC1442.10c  | 0.9999546 | Known | NO  | YES | NO  | YES |
| SPBC11B10.09  | SPBC19F8.07   | 0.9999545 | Known | NO  | YES | YES | YES |
| SPBC354.12    | SPCC1442.10c  | 0.9999545 | Novel | NO  | NO  | NO  | YES |
| SPBC21B10.04c | SPAC16E8.09   | 0.9999545 | Known | YES | NO  | NO  | YES |
| SPAC8E11.03c  | SPBC28F2.07   | 0.9999544 | Known | NO  | NO  | YES | YES |
| SPCC1795.01c  | SPAC23H3.08c  | 0.9999543 | Known | YES | YES | YES | YES |
| SPAC343.09    | SPAC637.10c   | 0.9999543 | Known | NO  | YES | NO  | NO  |
| SPCC970.10c   | SPAC18B11.07c | 0.9999542 | Known | YES | YES | YES | NO  |
| SPAC823.15    | SPBP35G2.03c  | 0.999954  | Known | NO  | NO  | NO  | YES |
| SPBC16D10.09  | SPAC3G6.06c   | 0.999954  | Known | YES | YES | NO  | YES |
| SPAC18G6.15   | SPAC23H3.08c  | 0.999954  | Known | NO  | YES | YES | YES |
| SPAC1D4.06c   | SPBP16F5.02   | 0.999954  | Known | NO  | NO  | NO  | YES |
| SPAC27D7.07c  | SPBC6B1.07    | 0.999954  | Known | YES | NO  | YES | YES |
| SPAC222.15    | SPCC18B5.11c  | 0.999954  | Known | NO  | YES | NO  | YES |
| SPAPB1A10.09  | SPAP8A3.08    | 0.999954  | Known | NO  | NO  | NO  | NO  |
| SPBC20F10.04c | SPCC645.04    | 0.9999539 | Known | YES | YES | YES | YES |
| SPCC1739.12   | SPBC16H5.07c  | 0.9999538 | Known | NO  | YES | YES | NO  |
| SPAC19B12.05c | SPCC1020.04c  | 0.9999538 | Known | NO  | NO  | NO  | YES |
| SPBC24C6.07   | SPBC1718.07c  | 0.9999537 | Known | NO  | YES | NO  | YES |
| SPBC20F10.06  | SPAC821.08c   | 0.9999537 | Known | YES | YES | YES | YES |
| SPAC21E11.03c | SPAC630.14c   | 0.9999536 | Known | YES | NO  | NO  | YES |
| SPAC22H12.02  | SPBC1734.11   | 0.9999536 | Known | NO  | NO  | NO  | NO  |
| SPAC4D7.05    | SPBC11B10.09  | 0.9999534 | Known | NO  | YES | YES | NO  |
| SPAC16A10.06c | SPAC644.14c   | 0.9999534 | Known | NO  | YES | YES | YES |
| SPAC17H9.09c  | SPBC4.07c     | 0.9999534 | Known | NO  | NO  | YES | YES |
| SPBC8D2.03c   | SPCC11E10.08  | 0.9999534 | Novel | NO  | YES | NO  | NO  |
| SPCC622.08c   | SPBC342.05    | 0.9999534 | Known | NO  | NO  | NO  | YES |
| SPAC1834.03c  | SPCC11E10.08  | 0.9999534 | Known | NO  | YES | NO  | NO  |
| SPBC1105.12   | SPCC11E10.08  | 0.9999534 | Novel | NO  | YES | NO  | NO  |
| SPAC1783.03   | SPBC18E5.03c  | 0.9999533 | Known | YES | YES | YES | YES |
| SPBC11B10.09  | SPBC776.02c   | 0.9999533 | Known | NO  | NO  | YES | NO  |
| SPCC550.13    | SPBC30D10.04  | 0.9999531 | Known | NO  | YES | YES | YES |
| SPBC6B1.07    | SPAC2C4.03c   | 0.999953  | Known | YES | NO  | YES | YES |
| SPBC16D10.09  | SPBC1734.02c  | 0.999953  | Known | NO  | YES | YES | YES |
| SPAC19G12.06c | SPBC342.05    | 0.999953  | Known | NO  | NO  | NO  | YES |
| SPAC227.16c   | SPBP8B7.14c   | 0.9999527 | Known | NO  | NO  | YES | YES |
| SPAC17C9.10   | SPAC23H3.13c  | 0.9999526 | Known | NO  | NO  | NO  | NO  |
| SPBC29A3.07c  | SPBC6B1.07    | 0.9999525 | Known | NO  | NO  | YES | NO  |
| SPBC11B10.09  | SPBP16F5.02   | 0.9999525 | Known | NO  | YES | NO  | YES |
| SPBC14F5.04c  | SPCC550.05    | 0.9999525 | Known | NO  | NO  | NO  | NO  |
| SPBC4F6.15c   | SPAC3G6.06c   | 0.9999524 | Known | NO  | YES | NO  | YES |
| SPAC18G6.15   | SPCC1795.01c  | 0.9999524 | Known | NO  | YES | NO  | YES |
| SPBC21.05c    | SPBC409.05    | 0.9999524 | Known | NO  | NO  | NO  | NO  |
| SPAC222.15    | SPAC14C4.03   | 0.9999523 | Known | NO  | NO  | NO  | NO  |
| SPBP4H10.04   | SPCC830.06    | 0.9999523 | Known | YES | NO  | YES | YES |

|               |               |           |       |     |     |     |     |
|---------------|---------------|-----------|-------|-----|-----|-----|-----|
| SPAC890.02c   | SPBC20F10.06  | 0.9999522 | Known | NO  | YES | NO  | YES |
| SPBC21C3.16c  | SPAC23C4.19   | 0.9999521 | Known | YES | YES | YES | NO  |
| SPAC959.09c   | SPBC28E12.01c | 0.999952  | Known | YES | YES | YES | YES |
| SPAC57A10.05c | SPBC409.05    | 0.9999519 | Known | YES | YES | YES | YES |
| SPAC1F7.05    | SPAC29B12.03  | 0.9999519 | Known | YES | YES | NO  | NO  |
| SPAC21E11.03c | SPBC29B5.01   | 0.9999519 | Known | YES | YES | YES | YES |
| SPCC1739.12   | SPAC823.15    | 0.9999518 | Known | NO  | YES | YES | NO  |
| SPAC15E1.07c  | SPBC29A10.14  | 0.9999518 | Known | YES | YES | YES | NO  |
| SPBC32F12.09  | SPAPB2B4.03   | 0.9999516 | Known | NO  | NO  | NO  | YES |
| SPAC18G6.03   | SPAC22H10.12c | 0.9999513 | Known | YES | NO  | YES | YES |
| SPAC458.07    | SPAC23C4.15   | 0.9999512 | Known | NO  | YES | NO  | NO  |
| SPAC19G12.01c | SPBC83.04     | 0.9999512 | Known | YES | NO  | YES | YES |
| SPAC25B8.14   | SPBC27.02c    | 0.9999511 | Known | YES | NO  | YES | YES |
| SPAC19B12.05c | SPBC337.14    | 0.999951  | Known | NO  | YES | NO  | YES |
| SPBC6B1.07    | SPBC8D2.09c   | 0.999951  | Known | NO  | NO  | YES | YES |
| SPBC24C6.07   | SPBC18H10.04c | 0.999951  | Known | NO  | NO  | YES | NO  |
| SPAC1952.07   | SPAC20G4.04c  | 0.9999509 | Known | YES | YES | YES | YES |
| SPAC3G9.10c   | SPCC364.02c   | 0.9999509 | Known | NO  | NO  | NO  | NO  |
| SPBC24C6.07   | SPAC1687.15   | 0.9999508 | Known | NO  | NO  | NO  | NO  |
| SPAC4D7.05    | SPBC18H10.03  | 0.9999508 | Known | YES | YES | YES | YES |
| SPAC31G5.13   | SPBC409.06    | 0.9999507 | Known | YES | NO  | YES | YES |
| SPAC19G12.01c | SPBC28E12.01c | 0.9999507 | Known | YES | YES | YES | YES |
| SPCC18B5.11c  | SPBC20F10.06  | 0.9999507 | Known | NO  | YES | NO  | YES |
| SPCC18.11c    | SPCC306.04c   | 0.9999507 | Known | YES | NO  | YES | YES |
| SPAC1071.12c  | SPAC24H6.05   | 0.9999505 | Known | NO  | YES | YES | NO  |
| SPBC19C2.05   | SPAC1565.06c  | 0.9999505 | Known | NO  | YES | NO  | YES |
| SPAC27F1.04c  | SPAC688.02c   | 0.9999504 | Known | YES | YES | YES | YES |
| SPBC1289.12   | SPAC19A8.13   | 0.9999504 | Known | YES | NO  | YES | NO  |
| SPAC21E11.03c | SPBC83.03c    | 0.9999504 | Known | YES | NO  | YES | YES |
| SPBC1198.13c  | SPCC1442.10c  | 0.99995   | Known | NO  | YES | NO  | YES |
| SPBC725.13c   | SPBC776.12c   | 0.99995   | Known | NO  | NO  | YES | YES |
| SPAC1D4.06c   | SPBC11B10.09  | 0.9999499 | Known | NO  | YES | YES | YES |
| SPAC1565.06c  | SPAC227.07c   | 0.9999497 | Known | NO  | NO  | NO  | NO  |
| SPAP8A3.08    | SPBC11C11.02  | 0.9999496 | Known | YES | YES | YES | YES |
| SPBC409.05    | SPCC338.16    | 0.9999495 | Known | NO  | YES | NO  | YES |
| SPAC13D6.01   | SPAC26F1.06   | 0.9999494 | Known | NO  | NO  | NO  | NO  |
| SPAC11E3.09   | SPBC11B10.09  | 0.9999493 | Known | NO  | NO  | YES | YES |
| SPAC16A10.04  | SPBC26H8.07c  | 0.9999493 | Known | NO  | YES | YES | NO  |
| SPAC29A4.08c  | SPBC28F2.04c  | 0.9999492 | Known | YES | YES | YES | YES |
| SPAC2F7.04    | SPBC21.04     | 0.9999492 | Known | YES | NO  | NO  | YES |
| SPAC1D4.13    | SPAC1565.04c  | 0.9999491 | Known | NO  | YES | YES | YES |
| SPCC550.05    | SPBC651.10    | 0.9999491 | Known | YES | YES | YES | YES |
| SPBC32F12.04  | SPBC20F10.06  | 0.9999491 | Known | NO  | NO  | NO  | YES |
| SPAP8A3.08    | SPBC4C3.12    | 0.9999491 | Known | NO  | NO  | NO  | NO  |
| SPBC1105.06   | SPBC14F5.08   | 0.9999491 | Known | YES | NO  | YES | NO  |
| SPBC2F12.11c  | SPAC19E9.03   | 0.999949  | Known | NO  | NO  | YES | YES |
| SPAPB2B4.03   | SPBC2F12.11c  | 0.999949  | Known | NO  | NO  | YES | YES |

|               |               |           |       |     |     |     |     |
|---------------|---------------|-----------|-------|-----|-----|-----|-----|
| SPCC1259.13   | SPBC725.13c   | 0.9999489 | Known | NO  | NO  | NO  | YES |
| SPAC17H9.09c  | SPBC1718.07c  | 0.9999489 | Known | NO  | NO  | YES | YES |
| SPBC2D10.12   | SPAC637.10c   | 0.9999488 | Known | NO  | YES | YES | YES |
| SPBC3B9.21    | SPAC19A8.12   | 0.9999487 | Known | YES | YES | YES | NO  |
| SPBC12D12.01  | SPCC1682.04   | 0.9999485 | Known | NO  | NO  | YES | NO  |
| SPAC27F1.04c  | SPBC20F10.06  | 0.9999485 | Known | YES | YES | YES | YES |
| SPBC582.03    | SPAC9E9.13    | 0.9999483 | Known | NO  | YES | YES | YES |
| SPCC24B10.13  | SPBC1604.14c  | 0.9999483 | Known | NO  | NO  | NO  | YES |
| SPCC1259.13   | SPBC30D10.04  | 0.9999482 | Known | NO  | YES | NO  | YES |
| SPBC1D7.04    | SPBC26H8.07c  | 0.9999482 | Known | NO  | NO  | NO  | YES |
| SPAC19A8.13   | SPAC23D3.08   | 0.999948  | Known | YES | NO  | YES | NO  |
| SPCC188.11    | SPBC28F2.03   | 0.999948  | Known | NO  | NO  | NO  | NO  |
| SPBP23A10.04  | SPBC28E12.01c | 0.9999479 | Known | YES | YES | YES | YES |
| SPAC1F7.04    | SPBC4F6.12    | 0.9999478 | Known | NO  | YES | NO  | YES |
| SPAC22H10.12c | SPAC4C5.02c   | 0.9999478 | Known | NO  | NO  | YES | YES |
| SPAC16A10.06c | SPCC645.04    | 0.9999478 | Known | YES | YES | YES | YES |
| SPBC83.04     | SPAC6F12.15c  | 0.9999476 | Known | YES | NO  | YES | YES |
| SPBC19C2.03   | SPBC28F2.12   | 0.9999475 | Known | NO  | YES | YES | YES |
| SPAC22H10.12c | SPAC9E9.07c   | 0.9999475 | Known | NO  | NO  | YES | NO  |
| SPAC24H6.05   | SPAC18B11.07c | 0.9999475 | Known | NO  | NO  | NO  | NO  |
| SPCC24B10.13  | SPBC16H5.11c  | 0.9999472 | Known | NO  | NO  | NO  | YES |
| SPAC1783.07c  | SPBC409.05    | 0.9999472 | Known | NO  | NO  | NO  | NO  |
| SPAC6F12.15c  | SPBC28E12.01c | 0.9999471 | Known | YES | YES | YES | YES |
| SPBC336.08    | SPAC27F1.04c  | 0.9999471 | Known | YES | YES | YES | YES |
| SPAPB24D3.04c | SPAC3G6.06c   | 0.999947  | Known | NO  | NO  | NO  | NO  |
| SPAC110.03    | SPAC4F8.07c   | 0.999947  | Known | NO  | NO  | NO  | NO  |
| SPAC3A11.08   | SPAC29B12.03  | 0.9999467 | Known | NO  | NO  | YES | YES |
| SPAC637.10c   | SPAC26A3.16   | 0.9999467 | Known | NO  | NO  | YES | YES |
| SPAC17C9.01c  | SPBC28E12.01c | 0.9999466 | Known | YES | YES | YES | YES |
| SPAC17C9.13c  | SPBC776.02c   | 0.9999466 | Known | NO  | NO  | NO  | YES |
| SPAC17G6.14c  | SPBC1D7.04    | 0.9999465 | Known | YES | YES | NO  | YES |
| SPBC14C8.12   | SPAC19B12.05c | 0.9999464 | Known | NO  | YES | NO  | YES |
| SPBC12D12.06  | SPBC14F5.08   | 0.9999464 | Known | YES | NO  | YES | YES |
| SPAC16A10.04  | SPAC14C4.09   | 0.9999463 | Known | NO  | NO  | NO  | YES |
| SPBC409.09c   | SPBC409.04c   | 0.9999462 | Known | YES | YES | YES | YES |
| SPBC1718.03   | SPAC18G6.11c  | 0.9999461 | Known | NO  | NO  | YES | YES |
| SPAC25B8.14   | SPAC4F10.12   | 0.999946  | Known | YES | NO  | NO  | YES |
| SPBC17D11.01  | SPBC20F10.06  | 0.9999458 | Known | NO  | YES | YES | NO  |
| SPAC25B8.14   | SPBC18E5.03c  | 0.9999454 | Known | YES | YES | YES | YES |
| SPBC16D10.09  | SPAC1952.07   | 0.9999454 | Known | NO  | YES | YES | YES |
| SPAC3A12.07   | SPAC19B12.05c | 0.9999454 | Known | NO  | YES | NO  | YES |
| SPBC4F6.15c   | SPBC1709.14   | 0.9999453 | Known | NO  | NO  | NO  | NO  |
| SPAC16.01     | SPBC119.08    | 0.9999452 | Known | YES | YES | NO  | YES |
| SPBC29A3.16   | SPBC12D12.01  | 0.999945  | Known | NO  | NO  | NO  | NO  |
| SPAC17H9.09c  | SPAC17G6.04c  | 0.9999449 | Known | NO  | NO  | YES | YES |
| SPBC1685.11   | SPAC17H9.03c  | 0.9999449 | Known | NO  | YES | YES | YES |
| SPBC16G5.01   | SPAC31G5.13   | 0.9999449 | Known | YES | YES | YES | YES |

|               |               |           |       |     |     |     |     |
|---------------|---------------|-----------|-------|-----|-----|-----|-----|
| SPAC110.03    | SPBC4F6.12    | 0.9999448 | Known | YES | YES | NO  | NO  |
| SPBC839.07    | SPCC338.17c   | 0.9999448 | Known | NO  | NO  | NO  | YES |
| SPAC27D7.07c  | SPAC644.12    | 0.9999447 | Known | NO  | NO  | YES | YES |
| SPBC32F12.09  | SPBC19F5.01c  | 0.9999442 | Known | NO  | NO  | NO  | YES |
| SPCC18B5.11c  | SPBC30D10.04  | 0.999944  | Known | NO  | YES | NO  | YES |
| SPAC22H12.02  | SPAC16E8.16   | 0.9999439 | Known | NO  | NO  | YES | NO  |
| SPAC13C5.07   | SPCC622.08c   | 0.9999438 | Known | NO  | NO  | NO  | YES |
| SPAC644.12    | SPAC2C4.03c   | 0.9999435 | Known | YES | NO  | YES | YES |
| SPCC4B3.16    | SPBC16H5.07c  | 0.9999433 | Known | YES | NO  | NO  | NO  |
| SPAC19G12.06c | SPAC13C5.07   | 0.9999433 | Known | NO  | NO  | NO  | YES |
| SPBC16G5.01   | SPBC409.06    | 0.9999433 | Known | NO  | NO  | YES | YES |
| SPAC1002.15c  | SPBC14F5.08   | 0.9999431 | Known | YES | YES | YES | NO  |
| SPAC688.02c   | SPAC1687.15   | 0.9999431 | Known | NO  | NO  | NO  | YES |
| SPAPB24D3.04c | SPAC30D11.07  | 0.999943  | Known | NO  | NO  | YES | YES |
| SPAC17C9.13c  | SPAC31G5.13   | 0.999943  | Known | NO  | NO  | YES | YES |
| SPBC405.04c   | SPAC607.09c   | 0.999943  | Known | NO  | NO  | YES | NO  |
| SPBC1718.07c  | SPAC1565.06c  | 0.9999429 | Known | NO  | YES | NO  | YES |
| SPCC622.09    | SPAC1687.20c  | 0.9999428 | Known | NO  | NO  | NO  | YES |
| SPAC21E11.03c | SPAC1B1.01    | 0.9999427 | Known | YES | YES | YES | YES |
| SPCC970.04c   | SPAC1834.06c  | 0.9999427 | Known | YES | YES | YES | NO  |
| SPAC16A10.06c | SPBC20F10.04c | 0.9999426 | Known | YES | YES | YES | YES |
| SPAC6F6.08c   | SPAC17G8.10c  | 0.9999424 | Known | YES | NO  | YES | YES |
| SPCC550.05    | SPAC17A5.11   | 0.9999424 | Known | NO  | NO  | YES | NO  |
| SPBC6B1.07    | SPBC19C2.14   | 0.9999422 | Known | YES | NO  | YES | YES |
| SPAPB24D3.04c | SPAC3C7.03c   | 0.9999422 | Known | NO  | NO  | YES | NO  |
| SPBC4F6.12    | SPAC926.03    | 0.9999421 | Known | YES | YES | YES | YES |
| SPAC17G8.09   | SPBC13G1.08c  | 0.999942  | Known | YES | NO  | YES | YES |
| SPBC409.04c   | SPCC1739.12   | 0.9999417 | Known | NO  | YES | NO  | YES |
| SPBC1289.02c  | SPAP8A3.06    | 0.9999417 | Known | YES | YES | YES | YES |
| SPAC17C9.13c  | SPBC14C8.01c  | 0.9999416 | Known | NO  | NO  | NO  | YES |
| SPBC1105.17   | SPCC290.04    | 0.9999416 | Known | NO  | YES | NO  | YES |
| SPCC297.03    | SPAC4A8.15c   | 0.9999415 | Known | NO  | NO  | NO  | YES |
| SPAC3A12.18   | SPBC409.05    | 0.9999414 | Known | NO  | NO  | NO  | NO  |
| SPAC23C4.15   | SPBC14F5.08   | 0.9999413 | Known | NO  | NO  | NO  | YES |
| SPBC409.04c   | SPAC25B8.14   | 0.9999413 | Known | YES | YES | NO  | NO  |
| SPAC17H9.09c  | SPAC18G6.07c  | 0.9999412 | Known | NO  | NO  | NO  | YES |
| SPBC2F12.11c  | SPBC19F5.01c  | 0.9999412 | Known | NO  | NO  | NO  | YES |
| SPBC12D12.02c | SPAC8F11.07c  | 0.9999411 | Known | YES | NO  | NO  | YES |
| SPBC8D2.09c   | SPAC644.12    | 0.9999411 | Known | YES | NO  | YES | YES |
| SPCC1259.13   | SPBC409.05    | 0.999941  | Known | NO  | YES | NO  | YES |
| SPAC823.15    | SPCC4B3.16    | 0.9999408 | Novel | NO  | NO  | NO  | NO  |
| SPAC17G6.04c  | SPAC23C4.08   | 0.9999408 | Known | NO  | NO  | NO  | NO  |
| SPBC3D6.09    | SPBC1734.02c  | 0.9999407 | Known | NO  | YES | NO  | NO  |
| SPAC24H6.03   | SPAC23H4.18c  | 0.9999407 | Known | NO  | NO  | YES | YES |
| SPBC18E5.03c  | SPAC4F10.12   | 0.9999406 | Known | YES | NO  | YES | YES |
| SPAC5D6.05    | SPBC14F5.08   | 0.9999404 | Known | YES | YES | YES | YES |
| SPAC1002.06c  | SPBC1778.02   | 0.9999401 | Known | YES | YES | YES | NO  |



|               |               |           |       |     |     |     |     |
|---------------|---------------|-----------|-------|-----|-----|-----|-----|
| SPBC1718.01   | SPAC23H4.18c  | 0.9999399 | Known | NO  | YES | NO  | YES |
| SPCC126.02c   | SPCC622.08c   | 0.9999398 | Known | NO  | NO  | NO  | YES |
| SPAC110.03    | SPBC23G7.12c  | 0.9999398 | Known | NO  | NO  | NO  | NO  |
| SPAPYUG7.04c  | SPAC19B12.05c | 0.9999396 | Known | NO  | NO  | NO  | YES |
| SPCC970.07c   | SPCC622.09    | 0.9999394 | Known | NO  | NO  | NO  | YES |
| SPBC83.07     | SPCC18.11c    | 0.9999394 | Known | YES | NO  | YES | YES |
| SPBC1105.17   | SPAC1687.20c  | 0.9999394 | Known | YES | YES | YES | YES |
| SPAC19G12.06c | SPCC126.02c   | 0.9999393 | Known | NO  | NO  | NO  | YES |
| SPCC550.05    | SPCC645.04    | 0.9999392 | Known | YES | YES | YES | YES |
| SPAC17G6.12   | SPAC23H4.18c  | 0.9999392 | Known | NO  | NO  | YES | YES |
| SPAC16.01     | SPAC17G6.04c  | 0.9999391 | Known | NO  | NO  | NO  | NO  |
| SPBC1685.11   | SPBC11B10.06  | 0.9999388 | Known | NO  | YES | YES | YES |
| SPAC30D11.07  | SPBC23G7.11   | 0.9999386 | Known | NO  | NO  | YES | NO  |
| SPAC15A10.08  | SPAC4A8.15c   | 0.9999385 | Known | YES | NO  | YES | YES |
| SPBC428.08c   | SPAC30D11.13  | 0.9999385 | Known | NO  | YES | NO  | YES |
| SPAC31G5.13   | SPAC637.10c   | 0.9999382 | Known | YES | NO  | YES | YES |
| SPBC21.04     | SPBC14F5.08   | 0.9999381 | Known | YES | NO  | NO  | YES |
| SPAC890.02c   | SPBC409.05    | 0.9999381 | Known | NO  | YES | NO  | NO  |
| SPBC13G1.11   | SPAC17G6.04c  | 0.9999381 | Known | NO  | NO  | NO  | NO  |
| SPAC222.15    | SPAC17A5.11   | 0.9999377 | Known | NO  | NO  | YES | YES |
| SPAC17H9.09c  | SPAC1D4.13    | 0.9999377 | Known | NO  | NO  | YES | YES |
| SPBC1198.13c  | SPAC22H12.02  | 0.9999374 | Known | YES | YES | YES | YES |
| SPAC1834.03c  | SPBC342.05    | 0.9999373 | Known | NO  | NO  | NO  | YES |
| SPBC1105.12   | SPBC342.05    | 0.9999373 | Novel | NO  | YES | NO  | YES |
| SPBC8D2.03c   | SPBC342.05    | 0.9999373 | Known | NO  | NO  | NO  | YES |
| SPBC3H7.06c   | SPBC409.05    | 0.9999371 | Known | NO  | YES | NO  | NO  |
| SPAC6F12.14   | SPBC28E12.01c | 0.9999368 | Known | YES | YES | YES | YES |
| SPAC8E11.02c  | SPAC17A2.13c  | 0.9999365 | Known | YES | YES | YES | YES |
| SPAC637.10c   | SPBC409.06    | 0.9999365 | Known | NO  | NO  | YES | YES |
| SPCC18B5.11c  | SPBC409.05    | 0.9999361 | Known | NO  | YES | NO  | YES |
| SPBC12D12.02c | SPAC27E2.05   | 0.999936  | Known | YES | YES | YES | YES |
| SPBC543.07    | SPAC16.01     | 0.9999358 | Known | NO  | NO  | NO  | YES |
| SPAC30D11.10  | SPAC30D11.13  | 0.9999356 | Known | NO  | YES | NO  | NO  |
| SPAC23G3.01   | SPAC1B3.12c   | 0.9999354 | Known | NO  | YES | YES | YES |
| SPBC24C6.07   | SPAC6F6.08c   | 0.9999354 | Known | YES | YES | YES | YES |
| SPAC22H12.02  | SPCC1442.10c  | 0.9999352 | Known | NO  | YES | NO  | YES |
| SPAC19G12.01c | SPAC27D7.05c  | 0.9999351 | Known | YES | NO  | YES | YES |
| SPAC1F7.04    | SPAC2E1P5.04c | 0.999935  | Known | NO  | YES | NO  | NO  |
| SPAC17C9.13c  | SPAP27G11.15  | 0.9999347 | Known | NO  | NO  | NO  | YES |
| SPBC582.03    | SPAC18B11.07c | 0.9999346 | Known | NO  | NO  | NO  | NO  |
| SPAC17C9.13c  | SPBC16G5.01   | 0.9999344 | Known | NO  | NO  | NO  | YES |
| SPAC25B8.14   | SPCC1393.04   | 0.9999342 | Known | YES | NO  | NO  | YES |
| SPAC17G6.06   | SPBC8D2.10c   | 0.9999336 | Known | YES | NO  | NO  | NO  |
| SPBC17G9.07   | SPBC8D2.10c   | 0.9999336 | Novel | YES | NO  | NO  | NO  |
| SPBC12D12.08c | SPCC11E10.08  | 0.9999336 | Known | NO  | NO  | NO  | YES |
| SPAC4D7.03    | SPAC23H4.18c  | 0.9999336 | Known | NO  | YES | NO  | YES |
| SPBC1D7.04    | SPBC16A3.05c  | 0.9999333 | Known | NO  | YES | YES | YES |

|               |               |           |       |     |     |     |     |
|---------------|---------------|-----------|-------|-----|-----|-----|-----|
| SPAC27D7.13c  | SPAC1805.08   | 0.9999332 | Known | YES | YES | YES | NO  |
| SPCC550.05    | SPBC20F10.04c | 0.9999332 | Known | YES | YES | YES | YES |
| SPBC56F2.01   | SPBC409.05    | 0.9999331 | Known | NO  | YES | NO  | NO  |
| SPAC19A8.13   | SPCC16A11.13  | 0.9999325 | Known | YES | YES | NO  | NO  |
| SPBC409.09c   | SPAC688.02c   | 0.9999324 | Known | YES | YES | YES | YES |
| SPAC12B10.07  | SPAC631.01c   | 0.9999322 | Known | YES | YES | YES | YES |
| SPBC32F12.09  | SPBC11B10.09  | 0.9999318 | Known | NO  | NO  | NO  | YES |
| SPAC13D6.01   | SPBC409.05    | 0.9999316 | Known | YES | YES | YES | YES |
| SPBC19C2.05   | SPBC119.04    | 0.9999313 | Known | NO  | YES | NO  | YES |
| SPCC550.05    | SPBC685.06    | 0.9999312 | Known | NO  | YES | NO  | NO  |
| SPBC839.07    | SPBC776.12c   | 0.9999311 | Known | NO  | NO  | NO  | YES |
| SPCC1235.07   | SPBC18E5.03c  | 0.9999311 | Known | YES | NO  | YES | NO  |
| SPBC6B1.07    | SPBC11G11.06c | 0.9999306 | Known | YES | NO  | YES | NO  |
| SPBC19C2.14   | SPAC644.12    | 0.9999305 | Known | NO  | NO  | YES | YES |
| SPAC17G8.05   | SPBC14F5.08   | 0.9999304 | Known | YES | YES | NO  | YES |
| SPAC27D7.05c  | SPAC6F12.15c  | 0.9999303 | Known | YES | NO  | YES | YES |
| SPAC3G9.04    | SPAC824.04    | 0.9999302 | Known | YES | NO  | NO  | YES |
| SPAC17H9.09c  | SPBC32H8.07   | 0.9999301 | Known | NO  | NO  | NO  | NO  |
| SPAC24B11.06c | SPCC576.03c   | 0.9999299 | Known | YES | YES | YES | NO  |
| SPBP8B7.12c   | SPAC25B8.14   | 0.9999299 | Known | YES | NO  | NO  | YES |
| SPAC16A10.05c | SPBC2F12.13   | 0.9999299 | Known | YES | NO  | NO  | YES |
| SPBC13G1.08c  | SPCC18.11c    | 0.9999298 | Known | YES | NO  | YES | YES |
| SPAC1834.03c  | SPCC290.04    | 0.9999298 | Known | NO  | NO  | NO  | NO  |
| SPBC1105.12   | SPCC290.04    | 0.9999298 | Known | NO  | NO  | NO  | YES |
| SPBC8D2.03c   | SPCC290.04    | 0.9999298 | Novel | NO  | NO  | NO  | NO  |
| SPAC18G6.15   | SPBC1289.03c  | 0.9999297 | Known | NO  | YES | NO  | YES |
| SPBC336.01    | SPBC409.03    | 0.9999295 | Known | NO  | YES | YES | YES |
| SPBC16G5.01   | SPAC637.10c   | 0.9999289 | Known | YES | NO  | YES | YES |
| SPBC14F5.04c  | SPBC409.05    | 0.9999287 | Known | NO  | NO  | NO  | NO  |
| SPBC12D12.01  | SPAC6G9.13c   | 0.9999285 | Known | YES | YES | NO  | NO  |
| SPCC1672.10   | SPCC970.12    | 0.9999284 | Known | YES | YES | YES | YES |
| SPBC4.05      | SPBC1D7.04    | 0.9999283 | Known | NO  | NO  | NO  | YES |
| SPBC4B4.07c   | SPAC19A8.13   | 0.9999281 | Known | YES | NO  | YES | NO  |
| SPCC1840.10   | SPAC644.12    | 0.9999277 | Known | YES | NO  | YES | NO  |
| SPCC1393.04   | SPBC18E5.03c  | 0.9999276 | Known | YES | NO  | YES | YES |
| SPAC4F8.10c   | SPBC32H8.12c  | 0.9999275 | Known | YES | NO  | YES | NO  |
| SPBC1105.11c  | SPBC428.08c   | 0.9999274 | Novel | NO  | YES | YES | YES |
| SPBC428.08c   | SPBC8D2.04    | 0.9999274 | Known | NO  | NO  | YES | YES |
| SPBC428.08c   | SPAC1834.04   | 0.9999274 | Known | NO  | NO  | YES | YES |
| SPBC1198.13c  | SPAC23C4.15   | 0.9999273 | Known | NO  | YES | NO  | YES |
| SPBC26H8.07c  | SPBC119.02    | 0.9999272 | Known | NO  | NO  | NO  | YES |
| SPCC550.05    | SPCC1827.05c  | 0.9999269 | Known | NO  | NO  | NO  | NO  |
| SPACUNK4.06c  | SPBC14F5.08   | 0.9999268 | Known | NO  | NO  | NO  | YES |
| SPACUNK4.06c  | SPBC32H8.12c  | 0.9999266 | Known | NO  | NO  | NO  | NO  |
| SPAC17G6.17   | SPBC409.05    | 0.9999265 | Known | NO  | YES | NO  | NO  |
| SPCC970.07c   | SPAC23H4.18c  | 0.9999263 | Known | YES | YES | NO  | YES |
| SPAC3A11.05c  | SPAC1805.08   | 0.9999261 | Known | YES | NO  | YES | NO  |

|               |               |           |       |     |     |     |     |
|---------------|---------------|-----------|-------|-----|-----|-----|-----|
| SPAC3C7.08c   | SPAC3G6.02    | 0.9999259 | Known | YES | NO  | YES | YES |
| SPCC1259.13   | SPCC622.08c   | 0.9999258 | Known | NO  | NO  | NO  | YES |
| SPCC1795.01c  | SPBC20F10.06  | 0.9999253 | Known | YES | YES | YES | YES |
| SPBC409.05    | SPBC1271.01c  | 0.9999253 | Known | NO  | YES | NO  | NO  |
| SPBC428.13c   | SPAC6F6.08c   | 0.9999252 | Known | YES | YES | NO  | YES |
| SPAC19G12.06c | SPCC1259.13   | 0.9999251 | Known | NO  | NO  | NO  | YES |
| SPCC1442.10c  | SPAC23C4.15   | 0.9999247 | Known | NO  | YES | YES | YES |
| SPCC16C4.13c  | SPCC1223.04c  | 0.9999243 | Known | YES | NO  | NO  | NO  |
| SPCC31H12.04c | SPCC1223.04c  | 0.9999243 | Novel | NO  | NO  | NO  | NO  |
| SPCC622.09    | SPBC106.10    | 0.9999242 | Known | NO  | NO  | NO  | NO  |
| SPBC409.04c   | SPCC188.04c   | 0.9999239 | Known | YES | YES | YES | YES |
| SPAC19G12.01c | SPAC343.03    | 0.9999238 | Known | YES | YES | YES | YES |
| SPAC110.03    | SPBC3F6.03    | 0.9999237 | Known | NO  | NO  | NO  | NO  |
| SPAC23G3.01   | SPBC19C2.03   | 0.9999237 | Known | NO  | YES | YES | YES |
| SPBC3E7.14    | SPBC6B1.07    | 0.9999236 | Known | YES | NO  | YES | YES |
| SPBP8B7.12c   | SPBC18E5.03c  | 0.9999229 | Known | YES | NO  | YES | YES |
| SPBC4B4.05    | SPBC6B1.07    | 0.9999223 | Known | YES | NO  | YES | YES |
| SPBC4F6.12    | SPAP8A3.08    | 0.9999218 | Known | YES | YES | YES | YES |
| SPCC622.08c   | SPAC30D11.10  | 0.9999213 | Known | NO  | NO  | NO  | YES |
| SPAC22A12.03c | SPBC409.05    | 0.9999213 | Known | NO  | NO  | NO  | NO  |
| SPCC1672.08c  | SPAC23C4.15   | 0.9999213 | Known | NO  | YES | NO  | YES |
| SPBC119.04    | SPAC8C9.03    | 0.9999211 | Known | NO  | NO  | NO  | YES |
| SPAC27F1.02c  | SPBC32H8.12c  | 0.9999209 | Known | YES | NO  | YES | YES |
| SPBC1685.15c  | SPAC16A10.05c | 0.9999208 | Known | YES | NO  | NO  | YES |
| SPBC428.08c   | SPCC622.09    | 0.9999206 | Known | NO  | NO  | NO  | YES |
| SPAC17H9.09c  | SPAC17C9.10   | 0.9999206 | Known | NO  | NO  | NO  | NO  |
| SPAC19G12.06c | SPAC30D11.10  | 0.9999206 | Known | NO  | NO  | NO  | YES |
| SPAC6F6.08c   | SPAC1565.06c  | 0.9999202 | Known | YES | YES | YES | YES |
| SPCC18B5.11c  | SPCC622.08c   | 0.9999197 | Known | NO  | NO  | NO  | YES |
| SPBC12D12.02c | SPBC1734.02c  | 0.9999196 | Known | YES | YES | YES | YES |
| SPBP23A10.04  | SPAC343.03    | 0.9999194 | Known | YES | YES | YES | YES |
| SPAC17H9.19c  | SPAC29B12.03  | 0.9999191 | Known | NO  | YES | YES | YES |
| SPAC19G12.06c | SPCC18B5.11c  | 0.999919  | Known | NO  | NO  | NO  | YES |
| SPAC22H10.10  | SPAC8E11.07c  | 0.9999187 | Known | YES | NO  | YES | NO  |
| SPBC17D11.07c | SPAC3G6.02    | 0.9999187 | Known | NO  | NO  | YES | YES |
| SPAC17H9.09c  | SPAC1565.04c  | 0.9999184 | Known | NO  | NO  | YES | YES |
| SPAC824.04    | SPAC227.08c   | 0.9999177 | Known | YES | NO  | YES | YES |
| SPAC18B11.07c | SPBC1734.06   | 0.9999177 | Known | YES | YES | YES | NO  |
| SPCC1827.08c  | SPBC409.05    | 0.9999176 | Known | NO  | NO  | NO  | NO  |
| SPBC32F12.11  | SPACUNK4.06c  | 0.9999175 | Known | NO  | YES | NO  | YES |
| SPBC354.12    | SPACUNK4.06c  | 0.9999173 | Known | NO  | NO  | NO  | NO  |
| SPAC5D6.05    | SPAC17C9.05c  | 0.9999162 | Known | YES | YES | YES | YES |
| SPBC4F6.15c   | SPAC4G9.11c   | 0.9999159 | Known | NO  | YES | NO  | YES |
| SPBC20F10.06  | SPBC18E5.03c  | 0.9999157 | Known | NO  | YES | NO  | YES |
| SPAC22H12.02  | SPAC29E6.08   | 0.999915  | Known | YES | YES | YES | YES |
| SPAC21E11.03c | SPAC664.01c   | 0.9999148 | Known | NO  | NO  | NO  | YES |
| SPAC6F6.02c   | SPBC409.05    | 0.9999144 | Known | NO  | YES | NO  | NO  |

|               |               |           |       |     |     |     |     |
|---------------|---------------|-----------|-------|-----|-----|-----|-----|
| SPBC11B10.09  | SPAC9E9.13    | 0.9999138 | Known | NO  | YES | YES | YES |
| SPAC1142.03c  | SPBC409.03    | 0.9999138 | Known | YES | YES | YES | YES |
| SPAC17C9.05c  | SPBC21.04     | 0.999913  | Known | YES | YES | NO  | YES |
| SPBC409.04c   | SPAC688.02c   | 0.9999127 | Known | YES | YES | YES | YES |
| SPCC11E10.07c | SPBC409.05    | 0.9999125 | Known | NO  | NO  | NO  | NO  |
| SPBC2D10.12   | SPAC6G10.11c  | 0.9999125 | Known | NO  | NO  | NO  | NO  |
| SPBC2D10.12   | SPAC589.10c   | 0.9999125 | Novel | NO  | NO  | YES | NO  |
| SPAC24H6.03   | SPBC12D12.08c | 0.9999115 | Known | YES | NO  | NO  | NO  |
| SPBC1105.11c  | SPBC36.05c    | 0.9999114 | Known | NO  | YES | YES | NO  |
| SPBC36.05c    | SPBC8D2.04    | 0.9999114 | Known | NO  | NO  | YES | NO  |
| SPBC36.05c    | SPAC1834.04   | 0.9999114 | Known | NO  | NO  | YES | NO  |
| SPAC13D6.04c  | SPAC23H4.18c  | 0.9999098 | Known | NO  | YES | NO  | YES |
| SPCC191.09c   | SPCC965.07c   | 0.9999097 | Known | YES | YES | YES | NO  |
| SPAC17G8.09   | SPCC594.05c   | 0.9999094 | Known | YES | NO  | YES | YES |
| SPBC12D12.08c | SPAC17G6.12   | 0.9999094 | Known | YES | NO  | NO  | NO  |
| SPCC1020.04c  | SPBC14F5.08   | 0.9999089 | Known | NO  | NO  | NO  | YES |
| SPBC3E7.14    | SPAC644.12    | 0.9999081 | Known | YES | NO  | YES | YES |
| SPBC32H8.12c  | SPAP8A3.08    | 0.9999079 | Known | YES | NO  | YES | YES |
| SPBC215.02    | SPAC1D4.13    | 0.9999077 | Known | NO  | YES | NO  | NO  |
| SPAC16A10.05c | SPAC1687.20c  | 0.9999072 | Known | YES | NO  | YES | YES |
| SPBP16F5.02   | SPBC409.05    | 0.999907  | Known | NO  | YES | YES | YES |
| SPBC336.08    | SPBC409.04c   | 0.9999069 | Known | YES | YES | YES | YES |
| SPAC22E12.07  | SPBC8D2.04    | 0.9999068 | Known | NO  | NO  | YES | YES |
| SPAC22E12.07  | SPAC1834.04   | 0.9999068 | Known | NO  | NO  | YES | YES |
| SPAC22E12.07  | SPBC1105.11c  | 0.9999068 | Novel | NO  | NO  | YES | NO  |
| SPAC8E11.07c  | SPBC26H8.07c  | 0.9999068 | Known | NO  | NO  | NO  | NO  |
| SPCP31B10.03c | SPBC14F5.08   | 0.9999066 | Known | YES | YES | YES | YES |
| SPBC4B4.05    | SPAC644.12    | 0.9999066 | Known | YES | NO  | YES | YES |
| SPAC19G12.01c | SPAC23C11.12  | 0.9999063 | Known | YES | YES | YES | YES |
| SPAC664.01c   | SPAC30D11.13  | 0.9999062 | Known | NO  | YES | NO  | YES |
| SPBC1105.17   | SPBC21.01     | 0.9999062 | Known | NO  | YES | YES | YES |
| SPAC30.03c    | SPCC736.09c   | 0.9999061 | Known | NO  | YES | YES | NO  |
| SPACUNK4.06c  | SPCC1442.10c  | 0.999906  | Known | NO  | YES | YES | YES |
| SPBC31F10.09c | SPBC14F5.08   | 0.9999058 | Known | YES | YES | YES | NO  |
| SPCC1450.05c  | SPBC14F5.08   | 0.9999058 | Known | YES | YES | YES | NO  |
| SPBC409.05    | SPBC776.18c   | 0.9999058 | Known | NO  | YES | NO  | YES |
| SPAC22E12.08  | SPAC29A4.10   | 0.9999057 | Known | YES | YES | YES | NO  |
| SPBC32F12.08c | SPBC27.02c    | 0.9999055 | Known | YES | NO  | YES | YES |
| SPBC215.03c   | SPAC29B12.03  | 0.9999055 | Known | NO  | NO  | NO  | YES |
| SPAC29A4.07   | SPBC14F5.08   | 0.9999042 | Known | YES | YES | YES | NO  |
| SPBC27.02c    | SPAC8C9.17c   | 0.9999042 | Known | YES | NO  | YES | YES |
| SPAC1142.05   | SPCC1393.10   | 0.9999038 | Known | YES | YES | YES | NO  |
| SPCC1672.10   | SPBC1105.17   | 0.9999036 | Known | NO  | YES | YES | YES |
| SPAC22E12.07  | SPCC622.08c   | 0.9999036 | Known | NO  | NO  | NO  | YES |
| SPAC17G8.09   | SPAC23H3.05c  | 0.9999032 | Known | YES | NO  | YES | YES |
| SPBC36.05c    | SPCC622.09    | 0.9999032 | Known | NO  | NO  | NO  | NO  |
| SPAC19G12.06c | SPAC22E12.07  | 0.9999027 | Known | NO  | NO  | NO  | YES |

|               |               |           |       |     |     |     |     |
|---------------|---------------|-----------|-------|-----|-----|-----|-----|
| SPBC1685.01   | SPCC830.06    | 0.9999004 | Known | YES | NO  | NO  | YES |
| SPAC17H9.03c  | SPBC11B10.06  | 0.9999002 | Known | NO  | YES | YES | YES |
| SPAC11H11.06  | SPAC4A8.15c   | 0.9999002 | Known | YES | NO  | NO  | YES |
| SPAC23C11.12  | SPAC6F12.15c  | 0.9998994 | Known | YES | YES | YES | YES |
| SPAC1687.13c  | SPBC409.05    | 0.9998994 | Known | NO  | NO  | NO  | YES |
| SPBC4.05      | SPBC119.02    | 0.9998992 | Known | NO  | YES | NO  | YES |
| SPBC24C6.07   | SPAC1565.06c  | 0.9998989 | Known | YES | YES | YES | YES |
| SPBP35G2.09   | SPAC19A8.13   | 0.9998986 | Known | YES | YES | YES | NO  |
| SPBC1105.17   | SPBP22H7.09c  | 0.9998985 | Known | YES | YES | YES | YES |
| SPBC530.14c   | SPCC417.02    | 0.9998984 | Known | NO  | NO  | NO  | NO  |
| SPBC354.03    | SPAC17G8.09   | 0.9998984 | Known | YES | NO  | YES | YES |
| SPAC22E12.07  | SPCC622.09    | 0.9998981 | Known | NO  | NO  | NO  | YES |
| SPBC336.08    | SPCC188.04c   | 0.999898  | Known | YES | YES | YES | YES |
| SPAC589.08c   | SPBC27.02c    | 0.9998979 | Known | YES | NO  | YES | YES |
| SPCC622.08c   | SPAC644.14c   | 0.9998977 | Known | NO  | NO  | NO  | YES |
| SPBC25D12.04  | SPAC29B12.03  | 0.9998976 | Known | YES | YES | NO  | YES |
| SPCC4G3.05c   | SPBC409.03    | 0.9998971 | Known | NO  | YES | YES | YES |
| SPAC19G12.06c | SPAC644.14c   | 0.9998968 | Known | NO  | NO  | NO  | YES |
| SPBC14C8.06   | SPAC4A8.15c   | 0.9998965 | Known | YES | NO  | NO  | YES |
| SPAC589.08c   | SPAC25B8.14   | 0.9998964 | Known | YES | NO  | NO  | YES |
| SPBC1773.07c  | SPBC1289.03c  | 0.9998964 | Known | NO  | YES | YES | NO  |
| SPAC4F8.10c   | SPAC631.01c   | 0.9998964 | Known | YES | YES | NO  | YES |
| SPAC5D6.08c   | SPAC821.08c   | 0.999896  | Known | NO  | YES | NO  | NO  |
| SPBC32H8.12c  | SPAC4A8.15c   | 0.999896  | Known | YES | NO  | YES | YES |
| SPCC1672.02c  | SPBC30D10.04  | 0.9998949 | Known | NO  | NO  | NO  | YES |
| SPAC1805.12c  | SPBC2D10.12   | 0.9998949 | Known | NO  | NO  | NO  | NO  |
| SPBC2D10.12   | SPAC11G7.04   | 0.9998949 | Known | NO  | NO  | YES | NO  |
| SPAC222.15    | SPAC13A11.03  | 0.9998937 | Known | YES | YES | YES | YES |
| SPAC7D4.07c   | SPBC17A3.07   | 0.999893  | Known | YES | YES | NO  | NO  |
| SPAC3A12.07   | SPBC14F5.08   | 0.9998923 | Known | NO  | NO  | NO  | YES |
| SPBC1289.07c  | SPAC1687.01   | 0.9998915 | Known | YES | YES | YES | NO  |
| SPAC17G8.09   | SPBC18H10.06c | 0.9998914 | Known | YES | NO  | YES | YES |
| SPAC12B10.07  | SPAC4F8.10c   | 0.9998911 | Known | YES | YES | YES | YES |
| SPAC19B12.05c | SPAC1B3.12c   | 0.9998907 | Known | NO  | YES | NO  | YES |
| SPCC594.05c   | SPCC18.11c    | 0.9998903 | Known | YES | NO  | YES | YES |
| SPCC970.07c   | SPBC12D12.08c | 0.9998901 | Known | NO  | YES | NO  | YES |
| SPAC19G12.01c | SPAC3G6.02    | 0.9998901 | Known | NO  | YES | NO  | NO  |
| SPBC1105.11c  | SPAC664.01c   | 0.9998894 | Known | NO  | YES | YES | NO  |
| SPAC664.01c   | SPAC1834.04   | 0.9998894 | Known | NO  | NO  | YES | YES |
| SPBC8D2.04    | SPAC664.01c   | 0.9998894 | Known | NO  | NO  | YES | YES |
| SPCP31B10.03c | SPBC776.18c   | 0.9998885 | Known | NO  | NO  | NO  | NO  |
| SPAC18G6.03   | SPAC4C5.02c   | 0.9998873 | Known | YES | YES | YES | YES |
| SPBC1105.12   | SPCC4B3.12    | 0.9998872 | Known | NO  | NO  | NO  | NO  |
| SPBC8D2.03c   | SPCC4B3.12    | 0.9998872 | Known | NO  | NO  | NO  | YES |
| SPAC1834.03c  | SPCC4B3.12    | 0.9998872 | Known | NO  | NO  | NO  | YES |
| SPCC1393.10   | SPBC23G7.16   | 0.9998852 | Known | YES | YES | YES | NO  |
| SPBP23A10.08  | SPAC1834.03c  | 0.999885  | Known | NO  | NO  | NO  | NO  |

|               |               |           |       |     |     |     |     |
|---------------|---------------|-----------|-------|-----|-----|-----|-----|
| SPBP23A10.08  | SPBC8D2.03c   | 0.999885  | Known | NO  | NO  | NO  | NO  |
| SPBP23A10.08  | SPBC1105.12   | 0.999885  | Known | NO  | NO  | NO  | NO  |
| SPAC17G8.03c  | SPBC3D6.09    | 0.9998837 | Known | YES | YES | NO  | NO  |
| SPBC11B10.09  | SPCC16A11.05c | 0.999883  | Known | NO  | NO  | NO  | YES |
| SPCC1020.04c  | SPCC1442.10c  | 0.999883  | Known | NO  | YES | YES | YES |
| SPBC428.13c   | SPAC1565.06c  | 0.999883  | Known | YES | YES | YES | YES |
| SPAC23H3.05c  | SPCC18.11c    | 0.9998827 | Known | YES | NO  | YES | YES |
| SPAC5D6.05    | SPBC21.04     | 0.9998825 | Known | YES | YES | NO  | YES |
| SPBC31E1.03   | SPAC167.03c   | 0.9998824 | Known | NO  | NO  | YES | NO  |
| SPAC20H4.03c  | SPCC1020.04c  | 0.9998813 | Known | NO  | YES | NO  | NO  |
| SPBC409.03    | SPAC11E3.08c  | 0.9998795 | Known | NO  | YES | NO  | YES |
| SPAC1F7.04    | SPAC20H4.11c  | 0.9998792 | Known | YES | YES | NO  | NO  |
| SPAC5D6.08c   | SPBC1198.12   | 0.9998787 | Known | NO  | YES | YES | NO  |
| SPCC622.09    | SPBC776.02c   | 0.9998786 | Known | NO  | NO  | NO  | NO  |
| SPBC354.03    | SPCC18.11c    | 0.9998769 | Known | YES | NO  | YES | YES |
| SPBC13G1.11   | SPAC4C5.02c   | 0.9998765 | Known | NO  | NO  | YES | NO  |
| SPBC337.14    | SPCC1442.10c  | 0.999876  | Known | NO  | YES | YES | YES |
| SPAC13D6.02c  | SPAC17H9.09c  | 0.999875  | Known | NO  | NO  | YES | NO  |
| SPBC725.13c   | SPBP4H10.21c  | 0.9998749 | Known | YES | NO  | YES | YES |
| SPCC970.04c   | SPAC27F1.02c  | 0.9998748 | Known | YES | NO  | NO  | YES |
| SPBP23A10.08  | SPAC1805.07c  | 0.9998712 | Known | NO  | NO  | YES | NO  |
| SPAC19A8.13   | SPAC26A3.08   | 0.9998709 | Known | YES | NO  | YES | NO  |
| SPBC19C2.03   | SPAC19B12.05c | 0.9998709 | Known | NO  | YES | NO  | YES |
| SPAC22E12.07  | SPAC1834.03c  | 0.9998703 | Known | NO  | NO  | NO  | NO  |
| SPAC22E12.07  | SPBC8D2.03c   | 0.9998703 | Known | NO  | NO  | NO  | NO  |
| SPAC22E12.07  | SPBC1105.12   | 0.9998703 | Novel | NO  | NO  | NO  | NO  |
| SPAC22H12.02  | SPAC30D11.13  | 0.9998694 | Known | NO  | YES | NO  | NO  |
| SPBC18H10.06c | SPCC18.11c    | 0.9998685 | Known | YES | NO  | YES | YES |
| SPAP8A3.08    | SPAC631.01c   | 0.9998683 | Known | YES | NO  | NO  | YES |
| SPBP23A10.09  | SPBC725.13c   | 0.9998667 | Known | YES | NO  | YES | YES |
| SPBC1921.03c  | SPAC3G6.02    | 0.9998667 | Known | YES | YES | YES | YES |
| SPAC1805.08   | SPAC17A5.11   | 0.9998666 | Known | NO  | NO  | YES | NO  |
| SPBC14F5.04c  | SPAC1805.07c  | 0.999865  | Known | NO  | NO  | NO  | NO  |
| SPBC14C8.12   | SPCC1442.10c  | 0.9998643 | Known | NO  | YES | YES | YES |
| SPAC20G4.06c  | SPAC631.01c   | 0.9998639 | Known | YES | NO  | NO  | YES |
| SPACUNK4.06c  | SPAC23C4.15   | 0.9998631 | Known | YES | YES | YES | YES |
| SPBC11B10.09  | SPAC29B12.03  | 0.999863  | Known | NO  | YES | YES | NO  |
| SPAC17G8.05   | SPBC21.04     | 0.9998627 | Known | YES | YES | YES | YES |
| SPAC3A12.07   | SPCC1442.10c  | 0.9998617 | Known | YES | YES | YES | YES |
| SPAPB17E12.02 | SPAC2G11.08c  | 0.9998608 | Novel | NO  | NO  | YES | NO  |
| SPAC2G11.08c  | SPAC19B12.12c | 0.9998608 | Known | NO  | NO  | YES | NO  |
| SPAC227.16c   | SPBP4H10.21c  | 0.9998605 | Known | YES | NO  | YES | YES |
| SPAC12B10.07  | SPAC20G4.06c  | 0.999857  | Known | YES | NO  | NO  | YES |
| SPBC12D12.08c | SPAC17H9.19c  | 0.9998561 | Known | NO  | YES | YES | NO  |
| SPBC9B6.05c   | SPCC364.02c   | 0.9998519 | Known | NO  | NO  | NO  | NO  |
| SPAC227.16c   | SPBP23A10.09  | 0.9998513 | Known | YES | NO  | YES | YES |
| SPAC4A8.15c   | SPAC631.01c   | 0.9998513 | Known | YES | NO  | NO  | YES |

|               |               |           |       |     |     |     |     |
|---------------|---------------|-----------|-------|-----|-----|-----|-----|
| SPAC110.03    | SPAC26A3.07c  | 0.9998508 | Known | NO  | NO  | NO  | NO  |
| SPAC110.03    | SPBC17G9.10   | 0.9998508 | Novel | NO  | NO  | NO  | NO  |
| SPBC11B10.09  | SPBC1734.14c  | 0.9998469 | Known | YES | NO  | YES | NO  |
| SPAPYUG7.04c  | SPCC1442.10c  | 0.9998469 | Known | NO  | YES | YES | YES |
| SPBC1105.17   | SPBC18E5.03c  | 0.9998465 | Known | YES | YES | YES | YES |
| SPAC16A10.05c | SPBP22H7.09c  | 0.9998446 | Known | YES | NO  | YES | YES |
| SPBC409.04c   | SPCC622.09    | 0.9998442 | Known | NO  | NO  | NO  | YES |
| SPBC428.13c   | SPAC3A12.14   | 0.9998401 | Known | YES | YES | NO  | NO  |
| SPBC119.01    | SPAC3G6.02    | 0.9998391 | Known | YES | NO  | YES | NO  |
| SPCC970.04c   | SPAC4A8.15c   | 0.9998354 | Known | NO  | NO  | NO  | NO  |
| SPAC1F8.06    | SPAC16A10.05c | 0.9998344 | Known | YES | NO  | NO  | YES |
| SPAC227.16c   | SPBC725.13c   | 0.9998341 | Known | YES | NO  | YES | YES |
| SPAC27D7.07c  | SPAC19A8.13   | 0.9998313 | Known | YES | YES | YES | NO  |
| SPCC1020.04c  | SPAC23C4.15   | 0.9998297 | Known | YES | YES | YES | YES |
| SPBC25B2.06c  | SPAC23H4.18c  | 0.9998285 | Known | NO  | YES | NO  | YES |
| SPAC19A8.13   | SPAC2C4.03c   | 0.9998278 | Known | YES | NO  | YES | NO  |
| SPBC1D7.04    | SPBC119.02    | 0.9998264 | Known | NO  | NO  | NO  | YES |
| SPAC644.14c   | SPBC409.03    | 0.9998248 | Known | NO  | YES | YES | YES |
| SPAC110.03    | SPAC6F6.07c   | 0.9998248 | Known | NO  | NO  | NO  | NO  |
| SPAC5D6.05    | SPCP31B10.03c | 0.9998227 | Known | YES | YES | YES | YES |
| SPBC4.07c     | SPAC3G6.02    | 0.9998207 | Known | NO  | YES | YES | YES |
| SPAC110.03    | SPBC119.02    | 0.9998194 | Known | NO  | NO  | NO  | NO  |
| SPAC20H4.07   | SPBC409.03    | 0.9998191 | Known | NO  | NO  | YES | YES |
| SPAPB8E5.02c  | SPAC3G6.02    | 0.9998186 | Novel | NO  | YES | YES | YES |
| SPAC1420.03   | SPAC3G6.02    | 0.9998186 | Known | NO  | YES | YES | YES |
| SPAC1783.03   | SPAC16A10.05c | 0.9998175 | Known | YES | NO  | YES | YES |
| SPAC3C7.03c   | SPBC409.03    | 0.9998169 | Known | NO  | NO  | YES | YES |
| SPAC110.03    | SPCC962.04    | 0.9998165 | Known | NO  | NO  | NO  | NO  |
| SPAC3A11.12c  | SPAC3G6.02    | 0.9998164 | Known | NO  | NO  | NO  | NO  |
| SPBC27.02c    | SPAC1805.07c  | 0.9998148 | Known | YES | NO  | YES | YES |
| SPBC27.02c    | SPCC417.02    | 0.9998148 | Known | YES | NO  | YES | NO  |
| SPAC17G6.14c  | SPAC3G6.02    | 0.9998146 | Known | NO  | YES | NO  | YES |
| SPAC9.02c     | SPBC409.05    | 0.9998071 | Known | NO  | NO  | NO  | NO  |
| SPAC8E11.03c  | SPBC409.03    | 0.9998064 | Known | NO  | NO  | YES | YES |
| SPBC582.07c   | SPAC3G6.02    | 0.9998028 | Known | NO  | YES | YES | NO  |
| SPAC926.03    | SPAP8A3.08    | 0.9998013 | Known | YES | YES | YES | YES |
| SPBC32F12.08c | SPAC589.08c   | 0.9997999 | Known | YES | NO  | YES | YES |
| SPAC589.08c   | SPAC8C9.17c   | 0.9997972 | Known | YES | NO  | YES | YES |
| SPBC1718.03   | SPBC3B9.07c   | 0.9997971 | Known | YES | YES | YES | YES |
| SPCC622.09    | SPAC3C7.14c   | 0.9997957 | Known | NO  | NO  | NO  | NO  |
| SPBC27.02c    | SPAC14C4.16   | 0.9997927 | Known | YES | NO  | YES | YES |
| SPCC576.10c   | SPAC3G6.02    | 0.9997921 | Known | YES | NO  | NO  | NO  |
| SPAC16A10.05c | SPBC27.02c    | 0.9997896 | Known | YES | NO  | YES | YES |
| SPBC19C2.03   | SPAC458.07    | 0.9997881 | Known | NO  | YES | NO  | NO  |
| SPBC19C2.14   | SPAC19A8.13   | 0.9997881 | Known | YES | YES | YES | NO  |
| SPACUNK4.06c  | SPCC1020.04c  | 0.9997875 | Known | YES | YES | YES | YES |
| SPAC16A10.05c | SPAC25B8.14   | 0.9997866 | Known | YES | NO  | YES | YES |

|               |               |           |       |     |     |     |     |
|---------------|---------------|-----------|-------|-----|-----|-----|-----|
| SPBC685.06    | SPBC18E5.06   | 0.9997845 | Known | YES | YES | YES | NO  |
| SPBC14F5.08   | SPAC1B3.12c   | 0.9997845 | Known | NO  | NO  | NO  | YES |
| SPBC28F2.07   | SPBC409.03    | 0.9997836 | Known | YES | YES | YES | YES |
| SPAPJ698.02c  | SPBC18E5.06   | 0.9997805 | Known | YES | YES | YES | NO  |
| SPCC576.03c   | SPBC106.02c   | 0.9997798 | Known | YES | YES | YES | NO  |
| SPAC110.03    | SPBC21B10.04c | 0.9997755 | Known | YES | NO  | YES | YES |
| SPBC215.04    | SPAC23H3.13c  | 0.9997747 | Known | YES | YES | YES | YES |
| SPACUNK4.06c  | SPBC337.14    | 0.9997746 | Known | YES | YES | YES | YES |
| SPBC16A3.05c  | SPAC3G6.02    | 0.999769  | Known | YES | YES | YES | YES |
| SPAC16A10.05c | SPAC4F10.12   | 0.9997678 | Known | YES | NO  | NO  | YES |
| SPAC22E12.08  | SPCC285.17    | 0.9997677 | Known | YES | YES | YES | NO  |
| SPAC16A10.05c | SPBC18E5.03c  | 0.9997651 | Known | YES | NO  | YES | YES |
| SPBC11B10.09  | SPAC23C11.12  | 0.9997641 | Known | NO  | YES | NO  | NO  |
| SPBC1734.14c  | SPBC20F10.01  | 0.9997568 | Known | NO  | NO  | NO  | NO  |
| SPBC14C8.12   | SPACUNK4.06c  | 0.9997534 | Known | YES | YES | YES | YES |
| SPACUNK4.06c  | SPAC3A12.07   | 0.9997486 | Known | NO  | YES | YES | YES |
| SPCC1682.10   | SPAC3G6.02    | 0.9997478 | Known | YES | NO  | YES | NO  |
| SPAC19A8.13   | SPBC11G11.06c | 0.9997457 | Known | YES | NO  | YES | NO  |
| SPAC11E3.04c  | SPCC338.05c   | 0.9997416 | Known | NO  | YES | YES | NO  |
| SPBC215.04    | SPBC32H8.07   | 0.9997361 | Known | YES | YES | YES | YES |
| SPAC31G5.13   | SPAC3G6.02    | 0.9997338 | Known | YES | NO  | YES | YES |
| SPBC409.06    | SPAC3G6.02    | 0.9997263 | Known | YES | NO  | NO  | YES |
| SPAC110.03    | SPAC7D4.07c   | 0.9997248 | Known | NO  | NO  | NO  | NO  |
| SPCC1442.10c  | SPAC1B3.12c   | 0.9997233 | Known | NO  | YES | YES | YES |
| SPAC20G4.06c  | SPAP8A3.08    | 0.9997222 | Known | YES | NO  | NO  | YES |
| SPAPYUG7.04c  | SPACUNK4.06c  | 0.9997219 | Known | YES | YES | YES | YES |
| SPBC3E7.14    | SPAC19A8.13   | 0.9997199 | Known | YES | NO  | YES | NO  |
| SPAC16A10.05c | SPCC1393.04   | 0.9997168 | Known | YES | NO  | NO  | YES |
| SPBC4B4.05    | SPAC19A8.13   | 0.999715  | Known | YES | NO  | YES | NO  |
| SPAC110.03    | SPCC970.05    | 0.999711  | Novel | NO  | NO  | NO  | NO  |
| SPAC110.03    | SPBC405.07    | 0.999711  | Known | NO  | NO  | NO  | NO  |
| SPBC1105.17   | SPCC970.12    | 0.9997088 | Known | NO  | YES | YES | YES |
| SPBC83.04     | SPBC28E12.01c | 0.9997053 | Known | YES | NO  | YES | YES |
| SPBP8B7.12c   | SPAC16A10.05c | 0.9996985 | Known | YES | NO  | NO  | YES |
| SPBC16G5.01   | SPAC3G6.02    | 0.9996935 | Known | NO  | NO  | NO  | YES |
| SPBC14C8.12   | SPCC1020.04c  | 0.9996932 | Known | YES | YES | YES | YES |
| SPAC3A12.07   | SPCC1020.04c  | 0.9996873 | Known | NO  | YES | YES | YES |
| SPAC20G4.06c  | SPAC4A8.15c   | 0.9996861 | Known | YES | NO  | NO  | YES |
| SPBC1198.13c  | SPBC19C2.03   | 0.9996843 | Known | NO  | YES | NO  | YES |
| SPAC19G12.06c | SPCC622.08c   | 0.9996839 | Known | YES | YES | YES | YES |
| SPBC409.05    | SPAC23H4.18c  | 0.9996799 | Known | NO  | YES | YES | YES |
| SPBC409.05    | SPAC16E8.18   | 0.9996799 | Known | NO  | NO  | NO  | NO  |
| SPBC19C2.03   | SPCC1442.10c  | 0.999673  | Known | NO  | YES | YES | YES |
| SPCC1672.08c  | SPBC19C2.03   | 0.9996582 | Known | YES | YES | NO  | YES |
| SPAC637.10c   | SPAC3G6.02    | 0.9996566 | Known | NO  | NO  | NO  | YES |
| SPAPB2B4.02   | SPAC15E1.09   | 0.9996539 | Known | YES | YES | YES | NO  |
| SPAC1002.06c  | SPAC6G9.13c   | 0.9996424 | Known | YES | YES | YES | NO  |



|               |               |           |       |     |     |     |     |
|---------------|---------------|-----------|-------|-----|-----|-----|-----|
| SPAC6C3.08    | SPAC3G6.02    | 0.9996422 | Known | NO  | NO  | YES | NO  |
| SPAC110.03    | SPBC1685.10   | 0.9996387 | Known | NO  | NO  | NO  | NO  |
| SPCC622.09    | SPBC1105.17   | 0.9996299 | Known | NO  | NO  | YES | YES |
| SPBC32C12.02  | SPBC1711.01c  | 0.9996127 | Novel | NO  | NO  | YES | NO  |
| SPBC32C12.02  | SPMTR.03      | 0.9996127 | Novel | NO  | NO  | NO  | NO  |
| SPBC32C12.02  | SPBC23G7.17c  | 0.9996127 | Known | NO  | NO  | YES | NO  |
| SPAC11H11.05c | SPBC18E5.03c  | 0.9996124 | Known | YES | NO  | YES | NO  |
| SPAC27D7.05c  | SPBC83.04     | 0.9996115 | Known | YES | NO  | YES | YES |
| SPAC27D7.05c  | SPBC28E12.01c | 0.9996082 | Known | YES | YES | YES | YES |
| SPAC589.08c   | SPAC1805.07c  | 0.9996078 | Known | YES | NO  | YES | YES |
| SPAC17G8.09   | SPCC18.11c    | 0.9995923 | Known | YES | NO  | YES | YES |
| SPBC32F12.08c | SPAC16A10.05c | 0.9995877 | Known | YES | NO  | YES | YES |
| SPAC16A10.05c | SPAC8C9.17c   | 0.999582  | Known | YES | NO  | YES | YES |
| SPBC1D7.04    | SPAC3G6.02    | 0.9995727 | Known | NO  | YES | YES | YES |
| SPAC589.08c   | SPAC14C4.16   | 0.999561  | Known | YES | NO  | YES | YES |
| SPAC589.08c   | SPAC16A10.05c | 0.9995544 | Known | YES | NO  | YES | YES |
| SPAC343.03    | SPBC28E12.01c | 0.9995402 | Known | YES | YES | YES | YES |
| SPAC1834.03c  | SPBC1105.17   | 0.9995285 | Novel | NO  | NO  | NO  | YES |
| SPBC1105.17   | SPBC1105.12   | 0.9995285 | Known | NO  | YES | NO  | YES |
| SPBC8D2.03c   | SPBC1105.17   | 0.9995285 | Novel | NO  | NO  | YES | NO  |
| SPAC110.03    | SPAP8A3.04c   | 0.9995281 | Known | NO  | NO  | NO  | NO  |
| SPACUNK4.06c  | SPAC1B3.12c   | 0.9994972 | Known | YES | YES | YES | YES |
| SPAC23C11.12  | SPBC28E12.01c | 0.9994347 | Known | YES | YES | YES | YES |
| SPBC19C2.03   | SPACUNK4.06c  | 0.9994058 | Known | YES | YES | YES | YES |
| SPAC16A10.05c | SPBC1105.17   | 0.9993999 | Known | YES | NO  | YES | YES |
| SPCC1020.04c  | SPAC1B3.12c   | 0.9993746 | Known | YES | YES | YES | YES |
| SPAP8A3.04c   | SPAP8A3.08    | 0.9993309 | Known | NO  | NO  | YES | NO  |
| SPBC19C2.03   | SPCC1020.04c  | 0.9992609 | Known | YES | YES | YES | YES |
| SPAC16A10.05c | SPAC1805.07c  | 0.9991919 | Known | YES | NO  | YES | YES |
| SPAC16A10.05c | SPAC14C4.16   | 0.9990954 | Known | YES | NO  | YES | YES |
| SPBC31E1.03   | SPAC1B3.12c   | 0.9985755 | Known | NO  | YES | NO  | NO  |
| SPBC4F6.12    | SPAC20H4.11c  | 0.9889239 | Novel | YES | NO  | NO  | YES |
| SPAC20H4.11c  | SPCC645.07    | 0.9889167 | Novel | YES | NO  | YES | YES |
| SPCC645.06c   | SPAC20H4.11c  | 0.9889151 | Novel | YES | NO  | NO  | YES |
| SPAC20H4.11c  | SPAC1006.06   | 0.9889115 | Novel | NO  | NO  | YES | YES |
| SPBC3F6.05    | SPAC20H4.11c  | 0.9889112 | Novel | YES | NO  | YES | YES |
| SPBC21.06c    | SPAC20H4.11c  | 0.9889079 | Novel | NO  | NO  | NO  | YES |
| SPAC20H4.11c  | SPCC1739.11c  | 0.9889072 | Novel | YES | NO  | NO  | YES |
| SPBC12D12.04c | SPAC20H4.11c  | 0.9889059 | Novel | YES | NO  | NO  | YES |
| SPAC17G8.14c  | SPAC20H4.11c  | 0.9889047 | Novel | YES | NO  | NO  | YES |
| SPAC1F7.03    | SPAC20H4.11c  | 0.9888863 | Novel | YES | NO  | YES | YES |
| SPAC20H4.11c  | SPBC1604.14c  | 0.9888811 | Novel | YES | NO  | YES | YES |
| SPAC24B11.11c | SPAC20H4.11c  | 0.9888751 | Novel | NO  | NO  | NO  | YES |
| SPAC2E1P5.04c | SPAC20H4.11c  | 0.9888187 | Novel | NO  | NO  | NO  | YES |
| SPCC550.05    | SPAPJ698.02c  | 0.9886658 | Novel | NO  | YES | NO  | NO  |
| SPAC18G6.02c  | SPBC800.05c   | 0.9815313 | Novel | NO  | NO  | NO  | NO  |
| SPAC637.07    | SPBC800.05c   | 0.9815142 | Novel | NO  | NO  | NO  | YES |

|               |               |           |       |     |     |     |     |
|---------------|---------------|-----------|-------|-----|-----|-----|-----|
| SPBC800.05c   | SPBC32H8.12c  | 0.9813627 | Novel | NO  | NO  | YES | YES |
| SPAC823.15    | SPBC16H5.07c  | 0.9714806 | Novel | NO  | YES | YES | YES |
| SPCC31H12.05c | SPBP4H10.04   | 0.9711572 | Novel | NO  | YES | NO  | YES |
| SPBC16A3.15c  | SPCC895.07    | 0.9680177 | Novel | NO  | NO  | YES | YES |
| SPBC16A3.15c  | SPCC1322.12c  | 0.9679727 | Novel | NO  | NO  | NO  | NO  |
| SPBC16A3.15c  | SPBC3D6.04c   | 0.9679721 | Novel | NO  | NO  | NO  | NO  |
| SPBC16A3.15c  | SPBC4.04c     | 0.9679267 | Novel | NO  | NO  | NO  | NO  |
| SPBC16A3.15c  | SPAC2F7.03c   | 0.9679178 | Novel | NO  | NO  | NO  | YES |
| SPBC16A3.15c  | SPAC23H3.08c  | 0.9679128 | Novel | NO  | NO  | NO  | NO  |
| SPAC18G6.15   | SPBC16A3.15c  | 0.9678978 | Novel | NO  | NO  | YES | YES |
| SPBC16A3.15c  | SPAC30C2.02   | 0.9678976 | Novel | NO  | NO  | YES | NO  |
| SPAC31G5.11   | SPBC16A3.15c  | 0.967805  | Novel | NO  | NO  | NO  | NO  |
| SPBC11B10.09  | SPCC31H12.05c | 0.9663081 | Novel | NO  | NO  | NO  | YES |
| SPBC12D12.08c | SPBC2D10.12   | 0.9660531 | Novel | NO  | NO  | NO  | NO  |
| SPCC31H12.05c | SPAC4A8.12c   | 0.9610814 | Novel | NO  | NO  | NO  | YES |
| SPAC17G6.16c  | SPCC31H12.05c | 0.9607891 | Novel | NO  | NO  | NO  | YES |
| SPCC31H12.05c | SPAC6F12.15c  | 0.9604872 | Novel | NO  | NO  | NO  | YES |
| SPCC31H12.05c | SPBC26H8.10   | 0.9604759 | Novel | NO  | NO  | NO  | YES |
| SPAC17C9.13c  | SPCC31H12.05c | 0.960464  | Novel | NO  | NO  | NO  | YES |
| SPAC824.04    | SPCC31H12.05c | 0.9604063 | Novel | NO  | NO  | NO  | YES |
| SPCC31H12.05c | SPBC25B2.05   | 0.9603532 | Novel | YES | NO  | NO  | YES |
| SPCC31H12.05c | SPCC622.09    | 0.9602727 | Novel | NO  | NO  | NO  | YES |
| SPAC24B11.11c | SPAC16.01     | 0.9432762 | Novel | NO  | YES | NO  | NO  |
| SPCC18B5.11c  | SPAC17A2.13c  | 0.9397873 | Novel | YES | YES | NO  | YES |
| SPAC17A2.13c  | SPAC644.06c   | 0.9355123 | Novel | YES | NO  | NO  | YES |
| SPAC17A2.13c  | SPCC1322.08   | 0.9325763 | Novel | NO  | YES | NO  | YES |
| SPAC16.01     | SPBC1604.14c  | 0.9319119 | Novel | YES | YES | YES | NO  |
| SPAC17A2.13c  | SPBC19C2.05   | 0.9287639 | Novel | NO  | YES | NO  | YES |
| SPBC543.07    | SPAC1F7.04    | 0.9281198 | Novel | NO  | NO  | NO  | YES |
| SPBC21.06c    | SPAC16.01     | 0.9279066 | Novel | NO  | YES | NO  | NO  |
| SPAC1F7.04    | SPAC1F3.02c   | 0.9277413 | Novel | YES | YES | NO  | YES |
| SPAC16.01     | SPAC2E1P5.04c | 0.9273053 | Novel | NO  | YES | YES | NO  |
| SPCC645.05c   | SPAC3A12.14   | 0.9254877 | Novel | NO  | YES | NO  | NO  |
| SPBC3E7.08c   | SPAC17A2.13c  | 0.9251594 | Novel | NO  | NO  | NO  | YES |
| SPAC17A2.13c  | SPAPJ698.03c  | 0.9248096 | Novel | NO  | NO  | NO  | YES |
| SPCC970.07c   | SPAC17A2.13c  | 0.9245998 | Novel | NO  | YES | YES | YES |
| SPAC17A5.02c  | SPAC17A2.13c  | 0.9245979 | Novel | NO  | NO  | NO  | YES |
| SPAC27D7.03c  | SPAC17A2.13c  | 0.9245208 | Novel | NO  | YES | NO  | YES |
| SPAC17A2.13c  | SPBC19C2.01   | 0.9244643 | Novel | NO  | NO  | NO  | YES |
| SPAC17A2.13c  | SPCC11E10.08  | 0.9244355 | Novel | NO  | NO  | YES | YES |
| SPAC17A2.13c  | SPAC9E9.08    | 0.9242961 | Novel | NO  | NO  | YES | YES |
| SPAC17A2.13c  | SPAC1782.09c  | 0.924272  | Novel | NO  | YES | YES | YES |
| SPBC32C12.02  | SPAC17A2.13c  | 0.9242673 | Novel | NO  | NO  | NO  | YES |
| SPAC823.15    | SPBC776.02c   | 0.9233766 | Novel | NO  | YES | YES | NO  |
| SPAC1F7.04    | SPBC119.08    | 0.9224261 | Novel | NO  | YES | NO  | YES |
| SPBC359.05    | SPAC30.04c    | 0.9213383 | Novel | YES | YES | NO  | NO  |
| SPAC1F7.04    | SPAC17G6.04c  | 0.9190865 | Novel | NO  | NO  | NO  | NO  |

|               |               |           |       |     |     |     |     |
|---------------|---------------|-----------|-------|-----|-----|-----|-----|
| SPAC16.01     | SPBC4F6.12    | 0.9186698 | Novel | YES | YES | NO  | NO  |
| SPAC16.01     | SPCC1739.11c  | 0.9180263 | Novel | YES | YES | NO  | NO  |
| SPCC645.06c   | SPAC16.01     | 0.9178925 | Novel | YES | YES | NO  | NO  |
| SPCC962.03c   | SPCC364.02c   | 0.9178397 | Novel | NO  | NO  | YES | YES |
| SPAC16.01     | SPAC1006.06   | 0.9175782 | Novel | NO  | YES | NO  | NO  |
| SPBC3F6.05    | SPAC16.01     | 0.9175423 | Novel | YES | NO  | NO  | NO  |
| SPAC16.01     | SPCC645.07    | 0.9173834 | Novel | YES | YES | NO  | NO  |
| SPAC16.01     | SPAC1F7.03    | 0.9170951 | Novel | NO  | YES | NO  | NO  |
| SPAC16.01     | SPAC20H4.11c  | 0.917005  | Novel | YES | YES | YES | NO  |
| SPAC16.01     | SPAC1F7.04    | 0.9160402 | Novel | YES | YES | YES | YES |
| SPAC823.15    | SPCC31H12.05c | 0.9123706 | Novel | NO  | YES | NO  | NO  |
| SPBC776.02c   | SPBC16H5.07c  | 0.9122948 | Novel | YES | YES | YES | YES |
| SPCC1739.12   | SPBC776.02c   | 0.9117928 | Novel | NO  | YES | YES | YES |
| SPCC16C4.11   | SPCC18B5.03   | 0.908142  | Novel | NO  | YES | NO  | NO  |
| SPAC1F7.04    | SPBC336.12c   | 0.9081047 | Novel | NO  | YES | NO  | NO  |
| SPCC16C4.11   | SPAC24H6.05   | 0.9071727 | Novel | NO  | YES | NO  | NO  |
| SPCC16C4.11   | SPCC1259.13   | 0.9064943 | Novel | NO  | YES | YES | NO  |
| SPBC409.09c   | SPBC8D2.01    | 0.9059704 | Novel | NO  | NO  | NO  | NO  |
| SPCC1739.12   | SPBC8D2.01    | 0.9059518 | Novel | NO  | NO  | NO  | NO  |
| SPBC24C6.07   | SPBC8D2.01    | 0.9059024 | Novel | NO  | NO  | NO  | NO  |
| SPBC409.04c   | SPBC8D2.01    | 0.9058587 | Novel | YES | NO  | NO  | NO  |
| SPBC8D2.01    | SPAC688.02c   | 0.9057881 | Novel | NO  | NO  | NO  | NO  |
| SPCC1739.12   | SPBP4H10.04   | 0.9056009 | Novel | NO  | YES | YES | YES |
| SPAC24B11.11c | SPAC110.03    | 0.9017931 | Novel | NO  | YES | NO  | NO  |
| SPCC31H12.05c | SPBC16H5.07c  | 0.9005326 | Novel | NO  | YES | NO  | NO  |
| SPAC22E12.06c | SPBC1289.13c  | 0.8987328 | Novel | YES | YES | YES | NO  |
| SPBC543.07    | SPAC20H4.11c  | 0.8983522 | Novel | NO  | NO  | NO  | NO  |
| SPAC1F7.04    | SPAC1F5.09c   | 0.8948519 | Novel | NO  | YES | NO  | YES |
| SPCC1739.12   | SPCC31H12.05c | 0.8938702 | Novel | NO  | YES | NO  | NO  |
| SPCC31H12.05c | SPBC119.08    | 0.8927024 | Novel | NO  | NO  | NO  | NO  |
| SPBC119.08    | SPAC20H4.11c  | 0.8916277 | Novel | YES | NO  | NO  | NO  |
| SPAC20H4.11c  | SPAC17G6.04c  | 0.8873263 | Novel | NO  | NO  | NO  | NO  |
| SPAC1F3.02c   | SPAC20H4.11c  | 0.8868889 | Novel | YES | NO  | NO  | NO  |
| SPAC1F7.04    | SPCC895.05    | 0.8863903 | Novel | NO  | YES | NO  | NO  |
| SPCC16C4.11   | SPBC776.02c   | 0.8857119 | Novel | NO  | NO  | NO  | NO  |
| SPCC1739.12   | SPBP35G2.03c  | 0.885338  | Novel | NO  | NO  | NO  | YES |
| SPCC1739.12   | SPCC188.02    | 0.8849789 | Novel | NO  | NO  | NO  | YES |
| SPBC119.08    | SPBC776.02c   | 0.8830283 | Novel | YES | NO  | NO  | YES |
| SPCC16C4.11   | SPBC582.03    | 0.8826628 | Novel | NO  | YES | NO  | NO  |
| SPCC16C4.11   | SPAC644.06c   | 0.8820253 | Novel | NO  | YES | YES | NO  |
| SPCC16C4.11   | SPAC23A1.06c  | 0.8803741 | Novel | NO  | YES | YES | NO  |
| SPAC110.03    | SPBC21.06c    | 0.8792002 | Novel | NO  | YES | NO  | NO  |
| SPCC16C4.11   | SPAC1D4.06c   | 0.8776472 | Novel | NO  | YES | YES | NO  |
| SPAC110.03    | SPAC20H4.11c  | 0.8771437 | Novel | YES | YES | YES | NO  |
| SPCC16C4.11   | SPAC24B11.06c | 0.8758252 | Novel | NO  | YES | YES | NO  |
| SPAC110.03    | SPAC1F7.04    | 0.8757699 | Novel | NO  | YES | YES | YES |
| SPCC1739.12   | SPAC6F12.12   | 0.8754141 | Novel | NO  | NO  | NO  | YES |

|              |               |           |       |     |     |     |     |
|--------------|---------------|-----------|-------|-----|-----|-----|-----|
| SPCC16C4.11  | SPBC29A10.15  | 0.8753728 | Novel | NO  | YES | NO  | NO  |
| SPBC336.04   | SPCC16C4.11   | 0.8753236 | Novel | NO  | YES | NO  | NO  |
| SPCC16C4.11  | SPAC821.04c   | 0.8752818 | Novel | NO  | YES | NO  | NO  |
| SPBC336.12c  | SPAC20H4.11c  | 0.8739549 | Novel | NO  | NO  | NO  | NO  |
| SPCC18B5.03  | SPCC1739.12   | 0.872451  | Novel | NO  | YES | NO  | YES |
| SPCC16C4.11  | SPAC821.08c   | 0.8724487 | Novel | NO  | YES | NO  | NO  |
| SPCC16C4.11  | SPBC649.05    | 0.8719194 | Novel | NO  | YES | NO  | NO  |
| SPAC3F10.02c | SPCC31H12.05c | 0.8683401 | Novel | NO  | NO  | NO  | NO  |
| SPAC110.03   | SPBC1685.02c  | 0.8682619 | Novel | NO  | NO  | NO  | NO  |
| SPCC16C4.11  | SPBC9B6.10    | 0.8680589 | Novel | NO  | YES | NO  | NO  |
| SPCC16C4.11  | SPAC19D5.01   | 0.8679116 | Novel | NO  | YES | NO  | NO  |
| SPCC16C4.11  | SPAC26F1.10c  | 0.8666121 | Novel | NO  | NO  | NO  | NO  |
| SPAC110.03   | SPCC645.06c   | 0.8665228 | Novel | YES | YES | NO  | YES |
| SPAC110.03   | SPBC3F6.05    | 0.8663927 | Novel | YES | NO  | NO  | NO  |
| SPAC110.03   | SPAC1006.06   | 0.866372  | Novel | NO  | YES | NO  | NO  |
| SPAC110.03   | SPCC645.07    | 0.8652102 | Novel | NO  | YES | NO  | NO  |
| SPCC16C4.11  | SPBC19F8.07   | 0.8649005 | Novel | NO  | YES | YES | NO  |
| SPBP4G3.02   | SPAC3C7.11c   | 0.8643023 | Novel | YES | NO  | NO  | NO  |
| SPAC110.03   | SPAC2E1P5.04c | 0.864093  | Novel | NO  | YES | NO  | NO  |
| SPCC16C4.11  | SPBC4C3.12    | 0.8635734 | Novel | NO  | NO  | NO  | NO  |
| SPCC16C4.11  | SPBP16F5.02   | 0.862932  | Novel | NO  | YES | NO  | NO  |
| SPAC110.03   | SPCC1739.11c  | 0.8627534 | Novel | YES | YES | NO  | NO  |
| SPAC823.15   | SPBC26H8.10   | 0.8622756 | Novel | NO  | NO  | YES | YES |
| SPAC110.03   | SPAC1F7.03    | 0.8622002 | Novel | NO  | YES | NO  | NO  |
| SPCC16C4.11  | SPCC31H12.05c | 0.8606255 | Novel | NO  | NO  | NO  | NO  |
| SPAC24H6.05  | SPCC1739.12   | 0.8602429 | Novel | NO  | YES | YES | YES |
| SPCC1919.10c | SPAC29A4.05   | 0.8600211 | Novel | YES | NO  | NO  | NO  |
| SPCC1739.12  | SPCC4B3.16    | 0.8599298 | Novel | NO  | NO  | NO  | YES |
| SPCC16C4.11  | SPBC1604.14c  | 0.8587535 | Novel | NO  | YES | YES | NO  |
| SPBC26H8.10  | SPBC16H5.07c  | 0.8583392 | Novel | NO  | NO  | NO  | YES |
| SPBC6B1.07   | SPAC2F3.17c   | 0.8578676 | Novel | YES | NO  | YES | NO  |
| SPCC16C4.11  | SPAPB2B4.03   | 0.8577403 | Novel | NO  | YES | YES | YES |
| SPAC2F3.17c  | SPAC644.12    | 0.8571429 | Novel | NO  | NO  | YES | NO  |
| SPCC16C4.11  | SPAC1782.09c  | 0.8569563 | Novel | NO  | YES | NO  | NO  |
| SPAC2F3.17c  | SPAC19A8.13   | 0.8568477 | Novel | NO  | NO  | YES | NO  |
| SPBC409.07c  | SPCC1223.11   | 0.8529312 | Novel | NO  | NO  | YES | YES |
| SPCC1223.11  | SPAC26F1.10c  | 0.8517767 | Novel | NO  | NO  | YES | YES |
| SPBC32H8.12c | SPBC146.13c   | 0.8511682 | Novel | YES | YES | YES | NO  |
| SPAC823.15   | SPAC1687.15   | 0.8461863 | Novel | NO  | NO  | YES | YES |
| SPAC20H4.11c | SPAC1F5.09c   | 0.8455268 | Novel | NO  | NO  | NO  | NO  |
| SPAC3F10.02c | SPBC776.02c   | 0.8442546 | Novel | NO  | NO  | NO  | NO  |
| SPCC16C4.11  | SPAC144.13c   | 0.8441708 | Novel | NO  | NO  | NO  | NO  |
| SPAC821.06   | SPBC16A3.01   | 0.8435849 | Novel | YES | YES | YES | YES |
| SPCC16C4.11  | SPCC1739.11c  | 0.8416053 | Novel | NO  | YES | NO  | NO  |
| SPAC22H10.04 | SPAC823.15    | 0.8398108 | Novel | NO  | YES | YES | NO  |
| SPAC823.15   | SPAC17G8.14c  | 0.8396071 | Novel | NO  | NO  | YES | YES |
| SPAC16.01    | SPAC1F5.09c   | 0.838645  | Novel | NO  | YES | NO  | YES |

|               |               |           |       |     |     |     |     |
|---------------|---------------|-----------|-------|-----|-----|-----|-----|
| SPCC16C4.11   | SPBC19G7.05c  | 0.837616  | Novel | NO  | NO  | NO  | NO  |
| SPCC16C4.09   | SPAC823.15    | 0.8369759 | Novel | NO  | NO  | NO  | YES |
| SPBC409.04c   | SPAC823.15    | 0.8364655 | Novel | NO  | NO  | NO  | YES |
| SPAC22H10.04  | SPBC16H5.07c  | 0.8359461 | Novel | YES | YES | YES | NO  |
| SPCC16C4.11   | SPAC57A10.02  | 0.834897  | Novel | NO  | YES | YES | NO  |
| SPAC22H10.04  | SPCC1739.12   | 0.8338797 | Novel | NO  | YES | YES | NO  |
| SPAC20H4.11c  | SPCC895.05    | 0.8308251 | Novel | NO  | NO  | NO  | NO  |
| SPBC16H5.07c  | SPAC1687.15   | 0.8304725 | Novel | NO  | NO  | YES | YES |
| SPAC24B11.06c | SPAC1D4.13    | 0.8291985 | Novel | NO  | YES | YES | NO  |
| SPAC22H10.04  | SPBP4H10.04   | 0.8286802 | Novel | NO  | YES | YES | NO  |
| SPAP8A3.04c   | SPAC1F7.04    | 0.8282592 | Novel | NO  | NO  | NO  | NO  |
| SPCC16C4.11   | SPAC19E9.02   | 0.827944  | Novel | NO  | YES | YES | NO  |
| SPBC1709.05   | SPBC646.09c   | 0.8268264 | Novel | NO  | NO  | YES | NO  |
| SPCC16C4.11   | SPAC11E3.09   | 0.8264307 | Novel | NO  | NO  | NO  | NO  |
| SPAC1F7.04    | SPAC16E8.09   | 0.8248099 | Novel | YES | YES | YES | NO  |
| SPAC24H6.09   | SPAC1F7.04    | 0.8236774 | Novel | NO  | YES | YES | YES |
| SPCC16C4.11   | SPBC32F12.06  | 0.8232187 | Novel | NO  | YES | NO  | NO  |
| SPAC13G7.02c  | SPAC3C7.11c   | 0.8224296 | Novel | NO  | YES | NO  | NO  |
| SPCC16C4.11   | SPBC14C8.07c  | 0.8223541 | Novel | NO  | YES | NO  | NO  |
| SPCC16C4.11   | SPAC22F3.09c  | 0.8221149 | Novel | NO  | YES | YES | NO  |
| SPCC16C4.11   | SPBC16H5.11c  | 0.819572  | Novel | NO  | YES | NO  | NO  |
| SPCC16C4.11   | SPCC1322.12c  | 0.8194868 | Novel | NO  | YES | YES | NO  |
| SPAC22H10.04  | SPBC26H8.10   | 0.8194262 | Novel | NO  | NO  | NO  | NO  |
| SPCC16C4.11   | SPBC336.12c   | 0.8192802 | Novel | NO  | YES | YES | NO  |
| SPAC17G8.14c  | SPBC16H5.07c  | 0.8187441 | Novel | NO  | NO  | YES | YES |
| SPBC21B10.04c | SPAC1F7.04    | 0.8174439 | Novel | NO  | NO  | NO  | NO  |
| SPCC16C4.11   | SPAC4D7.05    | 0.8173386 | Novel | NO  | YES | NO  | NO  |
| SPCC16C4.11   | SPBC1718.01   | 0.8165605 | Novel | NO  | YES | NO  | NO  |
| SPBC3F6.03    | SPAC1F7.04    | 0.8163898 | Novel | NO  | NO  | NO  | NO  |
| SPBC1685.15c  | SPAC1F7.04    | 0.8163292 | Novel | NO  | YES | NO  | NO  |
| SPAC637.07    | SPAC1F7.04    | 0.8163217 | Novel | NO  | YES | NO  | NO  |
| SPBC23G7.12c  | SPAC1F7.04    | 0.8162711 | Novel | NO  | NO  | NO  | NO  |
| SPBC19C2.05   | SPBC30D10.10c | 0.815706  | Novel | YES | YES | NO  | YES |
| SPAC1F7.04    | SPBC2F12.13   | 0.8156876 | Novel | NO  | YES | NO  | YES |
| SPAC22H10.07  | SPAC1F7.04    | 0.8156451 | Novel | YES | YES | YES | YES |
| SPAC1F7.04    | SPAC7D4.07c   | 0.8154437 | Novel | NO  | NO  | NO  | NO  |
| SPCC16C4.09   | SPBC16H5.07c  | 0.8150239 | Novel | YES | NO  | NO  | YES |
| SPAC1F7.04    | SPCC962.04    | 0.8149449 | Novel | NO  | NO  | NO  | NO  |
| SPAC1F7.04    | SPAC4F8.07c   | 0.8143706 | Novel | NO  | NO  | NO  | NO  |
| SPBC409.04c   | SPBC16H5.07c  | 0.8138339 | Novel | YES | NO  | NO  | YES |
| SPAC1F7.04    | SPBC17G9.10   | 0.8137141 | Novel | NO  | NO  | NO  | NO  |
| SPAC1F7.04    | SPAC26A3.07c  | 0.8137141 | Novel | NO  | NO  | NO  | NO  |
| SPAC1F7.04    | SPAC6F6.07c   | 0.8136281 | Novel | NO  | NO  | NO  | NO  |
| SPAC1F7.04    | SPBC119.02    | 0.81361   | Novel | NO  | NO  | NO  | NO  |
| SPAC1F7.04    | SPCC970.05    | 0.8132514 | Novel | NO  | NO  | NO  | NO  |
| SPAC1F7.04    | SPBC405.07    | 0.8132514 | Novel | NO  | NO  | NO  | NO  |
| SPAPB2B4.03   | SPAC821.08c   | 0.8130412 | Novel | NO  | YES | NO  | YES |

|               |               |           |       |     |     |     |     |
|---------------|---------------|-----------|-------|-----|-----|-----|-----|
| SPBC1685.10   | SPAC1F7.04    | 0.8130123 | Novel | NO  | NO  | NO  | NO  |
| SPAC6G9.06c   | SPAC29A4.05   | 0.8126577 | Novel | NO  | YES | NO  | NO  |
| SPCC16C4.11   | SPBC685.09    | 0.8125198 | Novel | NO  | NO  | NO  | NO  |
| SPCC16C4.11   | SPAC23C11.12  | 0.8121762 | Novel | NO  | YES | NO  | NO  |
| SPCC16C4.11   | SPCC16A11.05c | 0.8119201 | Novel | NO  | NO  | NO  | NO  |
| SPCC16C4.11   | SPBC146.03c   | 0.811876  | Novel | NO  | YES | NO  | NO  |
| SPCC16C4.11   | SPAC926.04c   | 0.8112827 | Novel | NO  | YES | NO  | NO  |
| SPCC16C4.11   | SPCC1795.11   | 0.8107162 | Novel | NO  | YES | NO  | NO  |
| SPCC16C4.11   | SPAC6B12.11   | 0.810596  | Novel | NO  | YES | NO  | NO  |
| SPBC216.07c   | SPCC24B10.07  | 0.8103287 | Novel | NO  | YES | YES | YES |
| SPCC16C4.11   | SPAC15A10.03c | 0.8100474 | Novel | NO  | YES | NO  | NO  |
| SPCC16C4.11   | SPAC29A4.02c  | 0.8098847 | Novel | NO  | NO  | NO  | NO  |
| SPCC16C4.11   | SPBC887.10    | 0.8094629 | Novel | NO  | YES | NO  | NO  |
| SPCC16C4.11   | SPBC646.13    | 0.8091475 | Novel | NO  | YES | NO  | NO  |
| SPCC16C4.11   | SPAC9E9.13    | 0.8090065 | Novel | NO  | YES | NO  | NO  |
| SPCC16C4.11   | SPBC1734.14c  | 0.808827  | Novel | NO  | NO  | YES | NO  |
| SPAC16.01     | SPCC895.05    | 0.8087486 | Novel | NO  | YES | YES | NO  |
| SPAC144.13c   | SPBC30D10.10c | 0.808607  | Novel | NO  | NO  | YES | YES |
| SPCC16C4.11   | SPBC342.05    | 0.8085428 | Novel | NO  | YES | YES | NO  |
| SPAC57A7.11   | SPBC30D10.10c | 0.8083382 | Novel | YES | NO  | YES | YES |
| SPCC16C4.11   | SPBC32F12.09  | 0.80833   | Novel | NO  | NO  | YES | NO  |
| SPAPB2B4.03   | SPBC19F8.07   | 0.8082941 | Novel | NO  | NO  | NO  | YES |
| SPCC16C4.11   | SPBC11B10.09  | 0.8082293 | Novel | NO  | YES | YES | YES |
| SPCC16C4.11   | SPAC29B12.03  | 0.8072933 | Novel | NO  | YES | NO  | NO  |
| SPBC428.13c   | SPAC29A4.05   | 0.8057338 | Novel | YES | YES | NO  | NO  |
| SPAC22H10.04  | SPBC776.02c   | 0.8053301 | Novel | YES | YES | YES | NO  |
| SPBC216.07c   | SPBC12C2.02c  | 0.8045438 | Novel | YES | NO  | YES | YES |
| SPCC1739.13   | SPAC3C7.11c   | 0.8042579 | Novel | NO  | YES | YES | NO  |
| SPBC216.07c   | SPCC777.08c   | 0.8039981 | Novel | NO  | NO  | YES | YES |
| SPBC14C8.06   | SPBC32H8.12c  | 0.8034885 | Novel | YES | NO  | NO  | YES |
| SPBC216.07c   | SPAC22F3.13   | 0.8029698 | Novel | YES | YES | YES | YES |
| SPBC216.07c   | SPAC630.13c   | 0.802458  | Novel | YES | YES | YES | YES |
| SPBC32F12.09  | SPBC30D10.10c | 0.8019137 | Novel | NO  | NO  | NO  | YES |
| SPBC3H7.15    | SPAC4C5.04    | 0.8017823 | Novel | NO  | NO  | NO  | YES |
| SPBC216.07c   | SPAPYUG7.02c  | 0.8015804 | Novel | NO  | YES | YES | YES |
| SPAC110.03    | SPAC16.01     | 0.8008495 | Novel | YES | YES | YES | YES |
| SPBP18G5.03   | SPBC30D10.10c | 0.8006705 | Novel | NO  | NO  | YES | YES |
| SPBC216.07c   | SPBC839.17c   | 0.8005928 | Novel | NO  | NO  | NO  | YES |
| SPAC4A8.05c   | SPAC11H11.06  | 0.7989205 | Novel | NO  | YES | NO  | NO  |
| SPAC2F7.03c   | SPBC1347.12   | 0.7984655 | Novel | NO  | NO  | NO  | NO  |
| SPAC110.03    | SPBC543.07    | 0.7984104 | Novel | NO  | NO  | NO  | YES |
| SPBC428.13c   | SPAC821.12    | 0.7976033 | Novel | NO  | YES | NO  | NO  |
| SPBC1347.12   | SPAC4A8.15c   | 0.7961677 | Novel | NO  | NO  | NO  | NO  |
| SPAC22H10.12c | SPBC1703.10   | 0.7932975 | Novel | NO  | NO  | YES | NO  |
| SPBC26H8.05c  | SPAC1687.15   | 0.7923137 | Novel | NO  | NO  | YES | NO  |
| SPAC22H10.04  | SPCC31H12.05c | 0.7916323 | Novel | NO  | YES | NO  | NO  |
| SPAP8A3.08    | SPBC1347.12   | 0.7913707 | Novel | NO  | NO  | NO  | NO  |

|               |               |           |       |     |     |     |     |
|---------------|---------------|-----------|-------|-----|-----|-----|-----|
| SPAC27F1.02c  | SPBC1347.12   | 0.7897105 | Novel | NO  | NO  | NO  | NO  |
| SPBC16A3.15c  | SPBC1347.12   | 0.7888634 | Novel | NO  | NO  | NO  | NO  |
| SPAC823.15    | SPBC26H8.05c  | 0.7876638 | Novel | NO  | YES | YES | NO  |
| SPBC26H8.05c  | SPAC17G8.14c  | 0.7876387 | Novel | NO  | NO  | YES | NO  |
| SPBC26H8.05c  | SPBC16H5.07c  | 0.7874246 | Novel | NO  | YES | YES | NO  |
| SPAC24B11.06c | SPBC16E9.11c  | 0.7873494 | Novel | NO  | NO  | NO  | NO  |
| SPAC4A8.05c   | SPBC1347.12   | 0.7864988 | Novel | NO  | NO  | NO  | NO  |
| SPCC970.07c   | SPBC337.08c   | 0.7860169 | Novel | NO  | NO  | NO  | NO  |
| SPCC297.03    | SPBC1347.12   | 0.7859751 | Novel | NO  | NO  | NO  | NO  |
| SPAC27E2.05   | SPBC1347.12   | 0.7859293 | Novel | NO  | NO  | NO  | NO  |
| SPAC17H9.19c  | SPBC337.08c   | 0.7853579 | Novel | NO  | NO  | NO  | NO  |
| SPAC17G6.12   | SPBC337.08c   | 0.7851976 | Novel | NO  | NO  | NO  | NO  |
| SPBC337.08c   | SPCC11E10.08  | 0.785124  | Novel | NO  | NO  | NO  | NO  |
| SPAC24H6.03   | SPBC337.08c   | 0.7848722 | Novel | NO  | NO  | NO  | NO  |
| SPBC26H8.05c  | SPBC26H8.10   | 0.7847539 | Novel | NO  | NO  | NO  | NO  |
| SPCC16C4.09   | SPBC26H8.05c  | 0.784749  | Novel | NO  | NO  | NO  | NO  |
| SPAC1F5.04c   | SPBC1347.12   | 0.7841566 | Novel | NO  | NO  | NO  | NO  |
| SPBC646.09c   | SPAC22A12.15c | 0.7841518 | Novel | NO  | YES | NO  | NO  |
| SPBC409.04c   | SPBC26H8.05c  | 0.7840426 | Novel | NO  | NO  | NO  | NO  |
| SPCC1739.12   | SPBC26H8.05c  | 0.783695  | Novel | NO  | YES | YES | NO  |
| SPBC336.12c   | SPBC1347.12   | 0.7836453 | Novel | NO  | NO  | NO  | NO  |
| SPAC15A10.08  | SPBC1347.12   | 0.7835825 | Novel | NO  | NO  | NO  | NO  |
| SPBC1347.12   | SPBC1778.06c  | 0.7835714 | Novel | NO  | NO  | NO  | NO  |
| SPBC582.03    | SPBC1347.12   | 0.7833453 | Novel | NO  | NO  | NO  | NO  |
| SPBC776.18c   | SPBC1347.12   | 0.7833426 | Novel | NO  | NO  | NO  | NO  |
| SPAC4F8.10c   | SPBC1347.12   | 0.7826523 | Novel | NO  | NO  | NO  | NO  |
| SPACUNK4.06c  | SPBC1347.12   | 0.7825708 | Novel | NO  | NO  | NO  | NO  |
| SPCC18B5.03   | SPBC26H8.05c  | 0.7796317 | Novel | NO  | NO  | NO  | NO  |
| SPAC22H10.04  | SPAC1687.15   | 0.7787685 | Novel | NO  | NO  | YES | NO  |
| SPAC15A10.03c | SPAC8E11.03c  | 0.7780416 | Novel | NO  | YES | YES | YES |
| SPAC110.03    | SPBC119.08    | 0.7779515 | Novel | YES | YES | NO  | YES |
| SPAC31G5.09c  | SPBC543.07    | 0.7776204 | Novel | NO  | YES | YES | NO  |
| SPBC25H2.13c  | SPBC14F5.12c  | 0.7743166 | Novel | NO  | NO  | NO  | YES |
| SPBC29A10.15  | SPBC14F5.12c  | 0.7741631 | Novel | NO  | NO  | NO  | YES |
| SPBC800.05c   | SPBC1347.12   | 0.7741344 | Novel | NO  | NO  | NO  | NO  |
| SPBC336.04    | SPBC14F5.12c  | 0.774029  | Novel | NO  | NO  | NO  | YES |
| SPCC16A11.17  | SPBC14F5.12c  | 0.7739457 | Novel | NO  | NO  | NO  | YES |
| SPBC800.03    | SPBC14F5.12c  | 0.7738432 | Novel | NO  | NO  | YES | YES |
| SPAC17D4.02   | SPBC14F5.12c  | 0.7737961 | Novel | NO  | NO  | NO  | YES |
| SPBC12D12.04c | SPAC23C4.08   | 0.7735141 | Novel | NO  | YES | YES | NO  |
| SPAC11H11.06  | SPAC27E2.05   | 0.7734997 | Novel | NO  | NO  | NO  | NO  |
| SPBC31F10.13c | SPBC14F5.12c  | 0.7732285 | Novel | NO  | NO  | YES | YES |
| SPAC11H11.06  | SPAC2F7.03c   | 0.7730473 | Novel | NO  | YES | NO  | YES |
| SPBC14F5.12c  | SPBC14C8.07c  | 0.7727743 | Novel | NO  | NO  | NO  | YES |
| SPAC823.15    | SPBC11B10.09  | 0.7727239 | Novel | NO  | NO  | YES | NO  |
| SPAC11H11.06  | SPAC1F5.04c   | 0.7724813 | Novel | NO  | YES | NO  | YES |
| SPCC297.03    | SPAC11H11.06  | 0.7723245 | Novel | NO  | YES | NO  | YES |

|              |              |           |       |     |     |     |     |
|--------------|--------------|-----------|-------|-----|-----|-----|-----|
| SPCC364.02c  | SPBC14F5.12c | 0.7719054 | Novel | NO  | NO  | NO  | YES |
| SPBC36.05c   | SPBC14F5.12c | 0.7716701 | Novel | NO  | NO  | YES | YES |
| SPBC409.04c  | SPBC14F5.12c | 0.7716583 | Novel | YES | NO  | YES | YES |
| SPAC27E2.05  | SPBC14F5.12c | 0.7715849 | Novel | NO  | NO  | NO  | YES |
| SPBC3E7.08c  | SPBC1198.12  | 0.7715676 | Novel | NO  | NO  | NO  | NO  |
| SPAC17G8.14c | SPAC23C4.08  | 0.7704762 | Novel | NO  | YES | YES | NO  |
| SPBC582.03   | SPAC11H11.06 | 0.7694108 | Novel | NO  | NO  | NO  | NO  |
| SPAC110.03   | SPAC17G6.04c | 0.7688339 | Novel | NO  | NO  | NO  | NO  |
| SPAC11H11.06 | SPBC16A3.15c | 0.7687999 | Novel | NO  | NO  | NO  | NO  |
| SPAC11H11.06 | SPBC336.12c  | 0.7685472 | Novel | NO  | NO  | NO  | NO  |
| SPBC26H8.05c | SPBP4H10.04  | 0.7685194 | Novel | NO  | YES | YES | NO  |
| SPBC1198.12  | SPAC821.08c  | 0.7682324 | Novel | NO  | YES | NO  | YES |
| SPAC15A10.08 | SPAC11H11.06 | 0.7681762 | Novel | NO  | YES | NO  | YES |
| SPAC11H11.06 | SPBC1778.06c | 0.7680899 | Novel | YES | YES | NO  | NO  |
| SPBC119.02   | SPCC338.05c  | 0.7680339 | Novel | NO  | YES | YES | NO  |
| SPAC11H11.06 | SPBC776.18c  | 0.7679958 | Novel | NO  | NO  | NO  | NO  |
| SPBC1198.12  | SPBC11B10.09 | 0.7676545 | Novel | NO  | YES | NO  | NO  |
| SPAC11H11.06 | SPAP8A3.08   | 0.7674871 | Novel | NO  | NO  | NO  | NO  |
| SPAC11H11.06 | SPAC4F8.10c  | 0.7674811 | Novel | YES | NO  | NO  | NO  |
| SPAC11H11.06 | SPAC27F1.02c | 0.7674348 | Novel | NO  | YES | NO  | NO  |
| SPAC11H11.06 | SPACUNK4.06c | 0.7673837 | Novel | NO  | NO  | NO  | NO  |
| SPCC16C4.09  | SPAC22H10.04 | 0.7664823 | Novel | YES | NO  | NO  | NO  |
| SPBC32F12.09 | SPBC1198.12  | 0.7659334 | Novel | NO  | NO  | NO  | NO  |
| SPAC22H10.04 | SPAC17G8.14c | 0.7656125 | Novel | NO  | NO  | YES | NO  |
| SPAC24H6.05  | SPBC119.02   | 0.7654084 | Novel | NO  | NO  | NO  | NO  |
| SPAC22H10.04 | SPBC409.04c  | 0.7647859 | Novel | YES | NO  | NO  | NO  |
| SPCC1259.13  | SPBC1198.12  | 0.7642292 | Novel | NO  | YES | NO  | NO  |
| SPBC216.07c  | SPBC1198.12  | 0.7641033 | Novel | NO  | YES | NO  | NO  |
| SPBC1198.12  | SPAC6F12.15c | 0.764044  | Novel | NO  | YES | NO  | YES |
| SPBC1198.12  | SPBC216.05   | 0.7640158 | Novel | YES | YES | NO  | NO  |
| SPCC18B5.03  | SPBC1198.12  | 0.7639715 | Novel | NO  | YES | NO  | NO  |
| SPBC660.14   | SPBC1198.12  | 0.7639383 | Novel | NO  | NO  | NO  | NO  |
| SPBC582.03   | SPBC1198.12  | 0.763875  | Novel | NO  | YES | NO  | NO  |
| SPBC1198.12  | SPAC22F3.09c | 0.763822  | Novel | NO  | YES | NO  | NO  |
| SPBC1198.12  | SPAC1952.07  | 0.7638125 | Novel | NO  | YES | NO  | NO  |
| SPAC823.15   | SPBC8D2.01   | 0.7637455 | Novel | NO  | NO  | YES | NO  |
| SPBC1198.12  | SPAPB2B4.03  | 0.7635547 | Novel | NO  | YES | NO  | NO  |
| SPCC188.02   | SPBC26H8.05c | 0.7630214 | Novel | NO  | NO  | NO  | NO  |
| SPAC22H10.04 | SPCC188.02   | 0.7611649 | Novel | NO  | NO  | NO  | NO  |
| SPAC1805.15c | SPBC16E9.11c | 0.7610581 | Novel | NO  | YES | YES | NO  |
| SPAC24H6.03  | SPAC11E3.04c | 0.7595988 | Novel | NO  | NO  | NO  | NO  |
| SPBC26H8.07c | SPAC11E3.04c | 0.7594008 | Novel | NO  | NO  | NO  | NO  |
| SPBC4.05     | SPAC11E3.04c | 0.7593899 | Novel | NO  | YES | NO  | NO  |
| SPBC582.03   | SPBC119.02   | 0.7592805 | Novel | NO  | NO  | NO  | NO  |
| SPBC1709.05  | SPAC3C7.11c  | 0.7591721 | Novel | NO  | YES | NO  | NO  |
| SPBC1D7.04   | SPAC11E3.04c | 0.7590439 | Novel | NO  | YES | NO  | NO  |
| SPAC977.10   | SPBC16E9.11c | 0.7589312 | Novel | NO  | NO  | NO  | NO  |



|               |               |           |       |     |     |     |     |
|---------------|---------------|-----------|-------|-----|-----|-----|-----|
| SPCC970.10c   | SPBC119.02    | 0.7589117 | Novel | NO  | YES | NO  | NO  |
| SPAC110.03    | SPAC11E3.04c  | 0.7588834 | Novel | NO  | YES | NO  | NO  |
| SPCC1739.12   | SPBC12D12.04c | 0.758843  | Novel | NO  | YES | YES | YES |
| SPBC26H8.05c  | SPAC6F12.12   | 0.7583637 | Novel | NO  | NO  | NO  | NO  |
| SPBC119.02    | SPCC1919.15   | 0.7579982 | Novel | NO  | YES | NO  | NO  |
| SPAC16.01     | SPAC16E8.09   | 0.7579294 | Novel | YES | YES | NO  | NO  |
| SPBC119.02    | SPBC1734.06   | 0.7573667 | Novel | NO  | YES | YES | NO  |
| SPCC794.03    | SPAC17A2.01   | 0.7569693 | Novel | NO  | NO  | NO  | NO  |
| SPBC11B10.09  | SPBC16H5.07c  | 0.7558824 | Novel | NO  | NO  | NO  | YES |
| SPAC11H11.06  | SPBC800.05c   | 0.7542782 | Novel | NO  | NO  | NO  | NO  |
| SPBC26H8.05c  | SPBP35G2.03c  | 0.7541641 | Novel | NO  | NO  | NO  | NO  |
| SPAP8A3.04c   | SPAC20H4.11c  | 0.7539745 | Novel | NO  | NO  | NO  | NO  |
| SPAC22H10.04  | SPBP35G2.03c  | 0.7538542 | Novel | NO  | NO  | NO  | NO  |
| SPCC188.11    | SPBC1709.04c  | 0.7537778 | Novel | NO  | NO  | YES | NO  |
| SPAC1D4.13    | SPBC119.08    | 0.7537627 | Novel | NO  | YES | YES | NO  |
| SPBC1D7.04    | SPAC18B11.07c | 0.7523569 | Novel | NO  | NO  | NO  | NO  |
| SPAC24H6.05   | SPBC26H8.05c  | 0.7515079 | Novel | NO  | YES | YES | NO  |
| SPBC26H8.05c  | SPCC4B3.16    | 0.7506033 | Novel | NO  | NO  | NO  | NO  |
| SPBC1703.10   | SPCC895.07    | 0.7501238 | Novel | NO  | NO  | NO  | NO  |
| SPBC8D2.01    | SPBC16H5.07c  | 0.7499499 | Novel | YES | NO  | YES | NO  |
| SPAC20H4.11c  | SPAC16E8.09   | 0.7499109 | Novel | YES | NO  | NO  | NO  |
| SPAC637.07    | SPAC16.01     | 0.7491632 | Novel | NO  | YES | NO  | NO  |
| SPAC24H6.09   | SPAC20H4.11c  | 0.7484231 | Novel | YES | NO  | NO  | NO  |
| SPAC16.01     | SPBC2F12.13   | 0.7479665 | Novel | NO  | YES | NO  | NO  |
| SPAC24B11.06c | SPBC543.07    | 0.7477185 | Novel | YES | YES | YES | NO  |
| SPAC110.03    | SPBC336.12c   | 0.7447297 | Novel | NO  | YES | NO  | NO  |
| SPAC22H10.04  | SPAC6F12.12   | 0.7439293 | Novel | NO  | NO  | NO  | NO  |
| SPAC24H6.05   | SPBC1709.18   | 0.7423917 | Novel | NO  | NO  | NO  | NO  |
| SPBC11B10.09  | SPCC1322.08   | 0.7416163 | Novel | NO  | YES | YES | YES |
| SPBC119.08    | SPAC23C4.08   | 0.741055  | Novel | NO  | YES | YES | NO  |
| SPAC23C4.12   | SPAC8F11.07c  | 0.7401357 | Novel | NO  | NO  | NO  | YES |
| SPBC21B10.04c | SPAC20H4.11c  | 0.7391514 | Novel | YES | NO  | YES | NO  |
| SPBC3F6.03    | SPAC20H4.11c  | 0.7383987 | Novel | NO  | NO  | NO  | NO  |
| SPBC1685.15c  | SPAC20H4.11c  | 0.7382299 | Novel | NO  | NO  | NO  | NO  |
| SPAC637.07    | SPAC20H4.11c  | 0.7378009 | Novel | NO  | NO  | NO  | NO  |
| SPBC23G7.12c  | SPAC20H4.11c  | 0.737382  | Novel | NO  | NO  | NO  | NO  |
| SPBC2F12.13   | SPAC20H4.11c  | 0.7369424 | Novel | NO  | NO  | NO  | NO  |
| SPAC22H10.07  | SPAC20H4.11c  | 0.7367302 | Novel | YES | NO  | YES | NO  |
| SPAC20H4.11c  | SPCC962.04    | 0.736429  | Novel | NO  | NO  | NO  | NO  |
| SPBC4.05      | SPAC18B11.07c | 0.7363636 | Novel | NO  | YES | NO  | NO  |
| SPAC7D4.07c   | SPAC20H4.11c  | 0.7361221 | Novel | NO  | NO  | NO  | NO  |
| SPBC26H8.07c  | SPAC18B11.07c | 0.7356255 | Novel | NO  | NO  | NO  | NO  |
| SPAC110.03    | SPAC18B11.07c | 0.7355053 | Novel | NO  | NO  | NO  | NO  |
| SPBC543.07    | SPAC23C4.08   | 0.7354651 | Novel | NO  | NO  | NO  | NO  |
| SPAC607.09c   | SPAPB1A10.10c | 0.7352673 | Novel | NO  | NO  | YES | NO  |
| SPAC24H6.03   | SPAC18B11.07c | 0.7352441 | Novel | NO  | NO  | NO  | NO  |
| SPAC4F8.07c   | SPAC20H4.11c  | 0.7352375 | Novel | NO  | NO  | NO  | NO  |

|               |               |           |       |     |     |     |     |
|---------------|---------------|-----------|-------|-----|-----|-----|-----|
| SPAC664.01c   | SPBC1105.17   | 0.7345958 | Novel | NO  | YES | YES | NO  |
| SPAC26A3.07c  | SPAC20H4.11c  | 0.7340225 | Novel | NO  | NO  | NO  | NO  |
| SPAC20H4.11c  | SPBC17G9.10   | 0.7340225 | Novel | NO  | NO  | NO  | NO  |
| SPAC6F6.07c   | SPAC20H4.11c  | 0.7338858 | Novel | NO  | NO  | NO  | NO  |
| SPBC119.02    | SPAC20H4.11c  | 0.733857  | Novel | NO  | NO  | NO  | NO  |
| SPBC26H8.05c  | SPBC776.02c   | 0.7337465 | Novel | NO  | YES | YES | NO  |
| SPAC18G6.02c  | SPBC1105.17   | 0.7333993 | Novel | NO  | YES | YES | NO  |
| SPBC405.07    | SPAC20H4.11c  | 0.7332873 | Novel | NO  | NO  | NO  | NO  |
| SPAC20H4.11c  | SPCC970.05    | 0.7332873 | Novel | NO  | NO  | NO  | NO  |
| SPAC22E12.07  | SPBC1105.17   | 0.7332128 | Novel | NO  | NO  | YES | YES |
| SPCC188.13c   | SPBC1105.17   | 0.7329802 | Novel | NO  | NO  | NO  | NO  |
| SPBC1685.10   | SPAC20H4.11c  | 0.7329075 | Novel | NO  | NO  | NO  | NO  |
| SPBC1105.17   | SPCC306.04c   | 0.7328491 | Novel | NO  | NO  | NO  | NO  |
| SPBC428.08c   | SPBC1105.17   | 0.7327153 | Novel | NO  | YES | YES | YES |
| SPBC36.05c    | SPBC1105.17   | 0.7324681 | Novel | NO  | YES | YES | YES |
| SPAC31G5.09c  | SPBC409.07c   | 0.7306075 | Novel | NO  | YES | YES | NO  |
| SPAC16.01     | SPBC23G7.12c  | 0.7305335 | Novel | NO  | NO  | NO  | NO  |
| SPAC3G9.07c   | SPCC622.16c   | 0.7300842 | Novel | NO  | NO  | YES | NO  |
| SPAC3G9.07c   | SPBC29B5.01   | 0.7299795 | Novel | NO  | NO  | NO  | NO  |
| SPAC3G9.07c   | SPBC1105.04c  | 0.7299768 | Novel | NO  | NO  | YES | NO  |
| SPAC24C9.07c  | SPBC11B10.09  | 0.728612  | Novel | NO  | NO  | NO  | NO  |
| SPBC1685.15c  | SPAC16.01     | 0.7284368 | Novel | NO  | YES | NO  | NO  |
| SPAC3G9.07c   | SPBC12C2.10c  | 0.7279914 | Novel | NO  | NO  | YES | NO  |
| SPAC3G9.07c   | SPAC29A4.18   | 0.7279506 | Novel | YES | NO  | YES | NO  |
| SPAC3G9.07c   | SPBC800.03    | 0.7279165 | Novel | NO  | YES | YES | NO  |
| SPCC16C4.11   | SPAC9G1.09    | 0.7278514 | Novel | NO  | YES | YES | NO  |
| SPAC3G9.07c   | SPCC622.09    | 0.727846  | Novel | NO  | NO  | NO  | NO  |
| SPAC3G9.07c   | SPAC23C11.15  | 0.7278318 | Novel | NO  | NO  | YES | NO  |
| SPAC3G9.07c   | SPBC2D10.17   | 0.7278275 | Novel | NO  | NO  | YES | NO  |
| SPAC3G9.07c   | SPAC23H4.12   | 0.7276578 | Novel | NO  | NO  | YES | NO  |
| SPAC3G9.07c   | SPBP23A10.08  | 0.7275479 | Novel | NO  | NO  | YES | NO  |
| SPAC3G9.07c   | SPBC1105.11c  | 0.7269694 | Novel | NO  | NO  | YES | NO  |
| SPAC3G9.07c   | SPBC8D2.04    | 0.7269694 | Novel | NO  | NO  | YES | NO  |
| SPAC3G9.07c   | SPAC1834.04   | 0.7269694 | Novel | NO  | NO  | YES | NO  |
| SPAC24B11.11c | SPAC24C9.07c  | 0.7268109 | Novel | NO  | NO  | NO  | NO  |
| SPAC24C9.07c  | SPCC1739.11c  | 0.7266438 | Novel | NO  | NO  | NO  | NO  |
| SPAC24C9.07c  | SPBC21.06c    | 0.7255353 | Novel | NO  | NO  | NO  | NO  |
| SPAC22H10.04  | SPCC18B5.03   | 0.7250227 | Novel | NO  | NO  | NO  | NO  |
| SPAC24B11.06c | SPBC19F8.07   | 0.7246931 | Novel | YES | YES | YES | YES |
| SPAC24C9.07c  | SPAC6F6.08c   | 0.7235467 | Novel | NO  | NO  | NO  | NO  |
| SPCC1739.12   | SPBC11B10.09  | 0.7222166 | Novel | NO  | YES | YES | NO  |
| SPAC24C9.07c  | SPAC1565.06c  | 0.7215434 | Novel | NO  | NO  | NO  | NO  |
| SPAC1F3.02c   | SPAC23C4.08   | 0.7205673 | Novel | NO  | YES | NO  | NO  |
| SPBC26H8.05c  | SPCC31H12.05c | 0.7198832 | Novel | NO  | YES | NO  | NO  |
| SPAC22H10.04  | SPCC4B3.16    | 0.71951   | Novel | YES | NO  | NO  | NO  |
| SPAC24C9.07c  | SPAC20G8.05c  | 0.7193269 | Novel | NO  | NO  | NO  | NO  |
| SPAC24C9.07c  | SPBC24C6.07   | 0.7190081 | Novel | NO  | NO  | NO  | NO  |

|               |               |           |       |     |     |     |     |
|---------------|---------------|-----------|-------|-----|-----|-----|-----|
| SPAC9G1.09    | SPBC11B10.09  | 0.7190027 | Novel | NO  | YES | YES | YES |
| SPBC8D2.01    | SPBC26H8.05c  | 0.7189374 | Novel | NO  | NO  | YES | NO  |
| SPAC57A7.08   | SPBC11B10.09  | 0.7189096 | Novel | NO  | NO  | NO  | NO  |
| SPAC24H6.05   | SPAC22H10.04  | 0.7186838 | Novel | YES | NO  | YES | NO  |
| SPAP8A3.04c   | SPAC16.01     | 0.7185703 | Novel | NO  | NO  | NO  | NO  |
| SPAC24C9.07c  | SPAPB2B4.03   | 0.7182272 | Novel | NO  | NO  | NO  | NO  |
| SPCC18B5.03   | SPAC24C9.07c  | 0.7181613 | Novel | NO  | NO  | NO  | NO  |
| SPAC24C9.07c  | SPCC5E4.04    | 0.7181577 | Novel | NO  | NO  | NO  | NO  |
| SPBC582.03    | SPAC24C9.07c  | 0.7179243 | Novel | NO  | NO  | NO  | NO  |
| SPCC16C4.07   | SPAC24C9.07c  | 0.7173875 | Novel | NO  | NO  | NO  | NO  |
| SPBC1604.14c  | SPAC23C4.08   | 0.7172161 | Novel | NO  | YES | YES | NO  |
| SPAC24C9.07c  | SPBC4F6.12    | 0.716315  | Novel | NO  | NO  | NO  | NO  |
| SPAC24C9.07c  | SPCC1322.12c  | 0.7155413 | Novel | NO  | NO  | NO  | NO  |
| SPAC24H6.09   | SPAC16.01     | 0.7151234 | Novel | YES | YES | YES | NO  |
| SPAPB1A10.09  | SPAC24C9.07c  | 0.7150352 | Novel | NO  | NO  | NO  | NO  |
| SPAC19G12.14  | SPAC24C9.07c  | 0.7149603 | Novel | NO  | NO  | NO  | NO  |
| SPAC24C9.07c  | SPAC23C4.18c  | 0.7147616 | Novel | NO  | NO  | NO  | NO  |
| SPAC16.01     | SPCC970.09    | 0.7147125 | Novel | YES | YES | NO  | NO  |
| SPAC24C9.07c  | SPAC4A8.15c   | 0.7146667 | Novel | NO  | NO  | NO  | NO  |
| SPAC227.16c   | SPAC24C9.07c  | 0.7145905 | Novel | NO  | NO  | NO  | NO  |
| SPAC16.01     | SPBC106.20    | 0.7134766 | Novel | YES | YES | NO  | NO  |
| SPAC31G5.09c  | SPAC1F5.09c   | 0.7129119 | Novel | NO  | YES | YES | NO  |
| SPBP4H10.04   | SPAC17G8.14c  | 0.7113017 | Novel | YES | YES | YES | YES |
| SPAC821.12    | SPAC9G1.09    | 0.7102999 | Novel | NO  | YES | YES | NO  |
| SPAC16A10.04  | SPBC12D12.04c | 0.7084514 | Novel | NO  | NO  | NO  | NO  |
| SPAC227.16c   | SPAC19B12.03  | 0.7083978 | Novel | YES | NO  | NO  | NO  |
| SPAC19B12.03  | SPBC21.06c    | 0.7076969 | Novel | NO  | NO  | NO  | NO  |
| SPAC2E1P5.04c | SPAC23C4.08   | 0.7074053 | Novel | NO  | YES | YES | NO  |
| SPAC19B12.03  | SPAC1565.06c  | 0.7070517 | Novel | NO  | NO  | NO  | NO  |
| SPAC19B12.03  | SPBC11B10.09  | 0.7064016 | Novel | NO  | NO  | NO  | NO  |
| SPAC1F7.04    | SPBC1685.02c  | 0.7063159 | Novel | NO  | NO  | NO  | NO  |
| SPCC5E4.03c   | SPAC18B11.07c | 0.7061588 | Novel | NO  | NO  | YES | NO  |
| SPAC24B11.11c | SPAC19B12.03  | 0.7060336 | Novel | NO  | NO  | NO  | NO  |
| SPCC18B5.03   | SPAC19B12.03  | 0.7060318 | Novel | NO  | NO  | NO  | NO  |
| SPAC22H10.04  | SPBC8D2.01    | 0.7057052 | Novel | YES | NO  | YES | NO  |
| SPBC16H5.10c  | SPAC644.12    | 0.7055911 | Novel | YES | NO  | NO  | NO  |
| SPBC21B10.04c | SPAC16.01     | 0.7055731 | Novel | YES | NO  | YES | NO  |
| SPBC3F6.03    | SPAC16.01     | 0.7055048 | Novel | NO  | NO  | NO  | NO  |
| SPAPB1A10.09  | SPAC19B12.03  | 0.7052132 | Novel | NO  | NO  | NO  | NO  |
| SPAC22H10.07  | SPAC16.01     | 0.7043718 | Novel | YES | YES | YES | NO  |
| SPAC8E11.03c  | SPBC216.05    | 0.7040308 | Novel | NO  | YES | YES | YES |
| SPAC19B12.03  | SPBC4F6.12    | 0.703945  | Novel | NO  | NO  | NO  | NO  |
| SPAC1142.05   | SPBC23G7.16   | 0.7030605 | Novel | YES | YES | YES | YES |
| SPAC16.01     | SPAC7D4.07c   | 0.7028414 | Novel | NO  | NO  | NO  | NO  |
| SPAC19B12.03  | SPCC1739.11c  | 0.7026282 | Novel | YES | NO  | NO  | NO  |
| SPAC16A10.04  | SPBC119.08    | 0.7024895 | Novel | NO  | NO  | YES | NO  |
| SPAC19B12.03  | SPAC20G8.05c  | 0.7024567 | Novel | YES | NO  | NO  | NO  |

|               |               |           |       |     |     |     |     |
|---------------|---------------|-----------|-------|-----|-----|-----|-----|
| SPAC16.01     | SPAC4F8.07c   | 0.7024051 | Novel | NO  | NO  | NO  | NO  |
| SPAC19B12.03  | SPAC23C4.18c  | 0.70232   | Novel | NO  | NO  | NO  | NO  |
| SPAC19B12.03  | SPAC6F6.08c   | 0.7021444 | Novel | NO  | NO  | NO  | NO  |
| SPAC19B12.03  | SPCC1322.12c  | 0.7021432 | Novel | NO  | NO  | NO  | NO  |
| SPAC17C9.13c  | SPAC823.15    | 0.7017738 | Novel | NO  | NO  | NO  | NO  |
| SPAC16.01     | SPCC962.04    | 0.7015698 | Novel | NO  | NO  | NO  | NO  |
| SPAC19B12.03  | SPBC24C6.07   | 0.7014827 | Novel | NO  | NO  | NO  | NO  |
| SPAC824.04    | SPAC823.15    | 0.7013172 | Novel | NO  | NO  | NO  | NO  |
| SPAC16.01     | SPAC6F6.07c   | 0.7012389 | Novel | NO  | NO  | NO  | NO  |
| SPAC19B12.03  | SPAPB2B4.03   | 0.7010506 | Novel | NO  | NO  | NO  | NO  |
| SPAC16.01     | SPAC26A3.07c  | 0.7010159 | Novel | NO  | NO  | NO  | NO  |
| SPAC16.01     | SPBC17G9.10   | 0.7010159 | Novel | NO  | NO  | NO  | NO  |
| SPAC19B12.03  | SPCC5E4.04    | 0.7009055 | Novel | YES | NO  | NO  | NO  |
| SPBC582.03    | SPAC19B12.03  | 0.7008131 | Novel | NO  | NO  | NO  | NO  |
| SPAC823.15    | SPAC4A8.12c   | 0.700639  | Novel | NO  | NO  | NO  | NO  |
| SPAC16.01     | SPBC119.02    | 0.7006216 | Novel | NO  | NO  | NO  | NO  |
| SPCC16C4.07   | SPAC19B12.03  | 0.7005761 | Novel | YES | NO  | NO  | NO  |
| SPAC17G6.16c  | SPAC823.15    | 0.7004965 | Novel | NO  | NO  | NO  | NO  |
| SPAC19G12.14  | SPAC19B12.03  | 0.7002957 | Novel | NO  | NO  | NO  | NO  |
| SPAC16.01     | SPCC970.05    | 0.7       | Novel | NO  | NO  | NO  | NO  |
| SPAC16.01     | SPBC405.07    | 0.7       | Novel | NO  | NO  | NO  | NO  |
| SPAC16A10.04  | SPBC543.07    | 0.6996651 | Novel | NO  | NO  | YES | NO  |
| SPBC1685.10   | SPAC16.01     | 0.6995856 | Novel | NO  | NO  | NO  | NO  |
| SPAC19B12.03  | SPAC4A8.15c   | 0.6995378 | Novel | NO  | NO  | NO  | NO  |
| SPAC16A10.04  | SPAC17G8.14c  | 0.6994941 | Novel | NO  | NO  | NO  | NO  |
| SPAC823.15    | SPBC25B2.05   | 0.6988245 | Novel | NO  | NO  | NO  | NO  |
| SPAC20H4.11c  | SPCC970.09    | 0.6979312 | Novel | YES | NO  | NO  | NO  |
| SPAC18B11.07c | SPBC15D4.14   | 0.6974318 | Novel | NO  | NO  | NO  | NO  |
| SPAC823.15    | SPAC6F12.15c  | 0.6973556 | Novel | NO  | NO  | NO  | NO  |
| SPBC106.20    | SPAC20H4.11c  | 0.6972728 | Novel | YES | NO  | NO  | NO  |
| SPAC6F12.15c  | SPAC18B11.07c | 0.6972602 | Novel | NO  | NO  | NO  | YES |
| SPAC823.15    | SPCC622.09    | 0.6962295 | Novel | NO  | NO  | NO  | NO  |
| SPAC31G5.09c  | SPBC11B10.09  | 0.6959871 | Novel | NO  | YES | YES | NO  |
| SPBC336.12c   | SPAC23C4.08   | 0.6947919 | Novel | NO  | YES | NO  | NO  |
| SPAC1783.05   | SPCC1620.14c  | 0.6944389 | Novel | YES | YES | NO  | YES |
| SPAC31G5.09c  | SPAC1F3.02c   | 0.6935733 | Novel | NO  | YES | YES | NO  |
| SPAC22H10.12c | SPAC6F6.15    | 0.6925351 | Novel | NO  | NO  | YES | NO  |
| SPAC8E11.03c  | SPCC18B5.11c  | 0.6921533 | Novel | NO  | YES | NO  | YES |
| SPAC8E11.03c  | SPAC1142.03c  | 0.6916819 | Novel | NO  | NO  | NO  | YES |
| SPCC16C4.11   | SPAC823.15    | 0.6910781 | Novel | NO  | NO  | YES | NO  |
| SPAC16A10.04  | SPAC17G6.04c  | 0.6901126 | Novel | NO  | NO  | NO  | NO  |
| SPAC9E9.07c   | SPAC4C5.02c   | 0.6893631 | Novel | NO  | YES | YES | YES |
| SPCC188.02    | SPBC776.02c   | 0.6891034 | Novel | NO  | NO  | NO  | NO  |
| SPBC4F6.12    | SPAC23C4.08   | 0.6889419 | Novel | NO  | YES | NO  | NO  |
| SPBC11B10.09  | SPCC1840.02c  | 0.6886055 | Novel | NO  | NO  | NO  | NO  |
| SPAC1F7.04    | SPAC23C4.08   | 0.6876432 | Novel | NO  | YES | NO  | YES |
| SPAC8E11.03c  | SPAC664.07c   | 0.6875918 | Novel | NO  | NO  | YES | YES |

|               |               |           |       |     |     |     |     |
|---------------|---------------|-----------|-------|-----|-----|-----|-----|
| SPAC20H4.11c  | SPAC23C4.08   | 0.687578  | Novel | NO  | YES | YES | NO  |
| SPAC8E11.03c  | SPBC342.05    | 0.6873345 | Novel | NO  | YES | NO  | YES |
| SPBC21.06c    | SPAC23C4.08   | 0.687239  | Novel | NO  | YES | NO  | YES |
| SPAC8E11.03c  | SPAC9E9.08    | 0.6872339 | Novel | NO  | NO  | NO  | YES |
| SPAC8E11.03c  | SPAC20G4.04c  | 0.6870083 | Novel | NO  | NO  | NO  | YES |
| SPAC8E11.03c  | SPBC543.03c   | 0.6868962 | Novel | NO  | YES | NO  | YES |
| SPAC8E11.03c  | SPAC1952.07   | 0.6868799 | Novel | NO  | NO  | YES | YES |
| SPBC21C3.18   | SPCC550.13    | 0.6868636 | Novel | NO  | NO  | YES | NO  |
| SPAC8E11.03c  | SPCC622.08c   | 0.6864769 | Novel | NO  | YES | NO  | YES |
| SPAC19G12.06c | SPAC8E11.03c  | 0.6864731 | Novel | NO  | YES | NO  | YES |
| SPBP35G2.03c  | SPBC776.02c   | 0.6864502 | Novel | NO  | NO  | NO  | NO  |
| SPCC1840.02c  | SPCC1739.11c  | 0.6862449 | Novel | YES | NO  | YES | NO  |
| SPAC8E11.03c  | SPBC119.14    | 0.6859752 | Novel | NO  | YES | YES | YES |
| SPAC9.10      | SPCC576.17c   | 0.6856533 | Novel | YES | NO  | NO  | NO  |
| SPAC24B11.11c | SPCC1840.02c  | 0.6852889 | Novel | NO  | NO  | NO  | NO  |
| SPCC18B5.03   | SPCC1840.02c  | 0.6851275 | Novel | NO  | NO  | NO  | NO  |
| SPBC21.06c    | SPCC1840.02c  | 0.6840893 | Novel | NO  | NO  | NO  | NO  |
| SPAC16A10.06c | SPAC8E11.03c  | 0.6833969 | Novel | NO  | NO  | NO  | YES |
| SPAC8E11.03c  | SPAC30D11.10  | 0.6825772 | Novel | NO  | YES | YES | YES |
| SPBC16G5.12c  | SPAC8E11.03c  | 0.6825404 | Novel | NO  | YES | NO  | YES |
| SPAC1D4.06c   | SPAC8E11.03c  | 0.6825038 | Novel | NO  | YES | NO  | YES |
| SPBC336.01    | SPAC8E11.03c  | 0.6821663 | Novel | NO  | YES | NO  | YES |
| SPAC8E11.03c  | SPAC3H5.06c   | 0.6819795 | Novel | NO  | YES | NO  | YES |
| SPCC1840.02c  | SPAC1565.06c  | 0.6819278 | Novel | NO  | NO  | YES | NO  |
| SPAC4H3.05    | SPAC8E11.03c  | 0.6817553 | Novel | NO  | YES | NO  | YES |
| SPCC1753.03c  | SPAC8E11.03c  | 0.6816494 | Novel | NO  | NO  | YES | YES |
| SPAC24B11.06c | SPAC1F5.09c   | 0.6814833 | Novel | NO  | YES | YES | NO  |
| SPAC8E11.03c  | SPAC2G11.12   | 0.681258  | Novel | NO  | YES | YES | YES |
| SPCC4G3.05c   | SPAC8E11.03c  | 0.6812218 | Novel | NO  | YES | YES | YES |
| SPAC8E11.03c  | SPAPB1E7.02c  | 0.6811975 | Novel | NO  | NO  | NO  | YES |
| SPBC16D10.04c | SPAC8E11.03c  | 0.6810973 | Novel | NO  | YES | YES | YES |
| SPAC8E11.03c  | SPAC25G10.04c | 0.6810864 | Novel | NO  | NO  | YES | YES |
| SPCC16C4.07   | SPCC1840.02c  | 0.6809386 | Novel | YES | NO  | NO  | NO  |
| SPBC3E7.08c   | SPAC8E11.03c  | 0.680859  | Novel | NO  | YES | NO  | YES |
| SPAC823.15    | SPBC119.08    | 0.6807906 | Novel | NO  | NO  | NO  | NO  |
| SPAC8E11.03c  | SPAC17A5.11   | 0.6806092 | Novel | NO  | YES | YES | YES |
| SPBC660.13c   | SPAC8E11.03c  | 0.6804733 | Novel | NO  | YES | YES | YES |
| SPAC8E11.03c  | SPAC11E3.08c  | 0.6804477 | Novel | NO  | NO  | NO  | YES |
| SPAC8E11.03c  | SPBC1734.06   | 0.6803549 | Novel | NO  | YES | NO  | YES |
| SPAC8E11.03c  | SPCC645.04    | 0.6802941 | Novel | NO  | NO  | NO  | YES |
| SPAC823.15    | SPBC12D12.04c | 0.6799364 | Novel | NO  | NO  | NO  | NO  |
| SPAPB2B4.03   | SPCC1840.02c  | 0.6798048 | Novel | NO  | NO  | NO  | NO  |
| SPAC31G5.09c  | SPAC17G8.14c  | 0.6797113 | Novel | NO  | YES | YES | NO  |
| SPAC6F6.08c   | SPCC1840.02c  | 0.6795824 | Novel | NO  | NO  | NO  | NO  |
| SPCC1840.02c  | SPAC23C4.18c  | 0.6794696 | Novel | NO  | NO  | NO  | NO  |
| SPAC1F7.04    | SPCC970.09    | 0.679441  | Novel | NO  | YES | NO  | YES |
| SPCC1840.02c  | SPAC20G8.05c  | 0.6792418 | Novel | YES | NO  | NO  | NO  |

|               |               |           |       |     |     |     |     |
|---------------|---------------|-----------|-------|-----|-----|-----|-----|
| SPBC582.03    | SPCC1840.02c  | 0.6791708 | Novel | NO  | NO  | NO  | NO  |
| SPAC31G5.09c  | SPBC12D12.04c | 0.6789831 | Novel | NO  | YES | YES | NO  |
| SPAC1F7.04    | SPBC106.20    | 0.6786317 | Novel | NO  | YES | NO  | NO  |
| SPBC24C6.07   | SPCC1840.02c  | 0.6786162 | Novel | NO  | NO  | NO  | NO  |
| SPAC821.09    | SPAC16.01     | 0.6783056 | Novel | NO  | NO  | NO  | NO  |
| SPCC1840.02c  | SPAC4A8.15c   | 0.6771838 | Novel | YES | NO  | NO  | NO  |
| SPBC1718.07c  | SPAC2C4.14c   | 0.6769114 | Novel | NO  | NO  | NO  | NO  |
| SPBC543.07    | SPAC17G8.14c  | 0.6766116 | Novel | NO  | YES | YES | YES |
| SPCC16C4.11   | SPCC1322.08   | 0.676401  | Novel | NO  | YES | YES | NO  |
| SPBC4F6.12    | SPCC1840.02c  | 0.6763644 | Novel | YES | NO  | NO  | NO  |
| SPBC11B10.09  | SPAC23C11.16  | 0.6762915 | Novel | NO  | YES | YES | YES |
| SPCC1840.02c  | SPCC5E4.04    | 0.6759388 | Novel | YES | NO  | NO  | NO  |
| SPAC16A10.04  | SPAC1F3.02c   | 0.6752804 | Novel | NO  | NO  | YES | NO  |
| SPCC1840.02c  | SPCC1322.12c  | 0.6752253 | Novel | NO  | NO  | NO  | NO  |
| SPAC31G5.09c  | SPBP4H10.04   | 0.6751216 | Novel | NO  | NO  | NO  | NO  |
| SPAPB1A10.09  | SPCC1840.02c  | 0.6750794 | Novel | NO  | NO  | NO  | NO  |
| SPAC57A7.08   | SPAC31G5.09c  | 0.674992  | Novel | NO  | NO  | NO  | NO  |
| SPAC19G12.14  | SPCC1840.02c  | 0.6749204 | Novel | YES | NO  | NO  | NO  |
| SPAC227.16c   | SPCC1840.02c  | 0.6743197 | Novel | YES | NO  | NO  | NO  |
| SPBC16E9.11c  | SPAC11G7.02   | 0.6735929 | Novel | NO  | YES | YES | NO  |
| SPCC16C4.11   | SPAC23C11.16  | 0.6735567 | Novel | NO  | YES | YES | NO  |
| SPAC24B11.06c | SPAC17G8.14c  | 0.6735404 | Novel | NO  | YES | YES | NO  |
| SPAC821.09    | SPAC20H4.11c  | 0.6733349 | Novel | NO  | NO  | NO  | NO  |
| SPAC16.01     | SPBC26H8.07c  | 0.6731574 | Novel | NO  | YES | YES | YES |
| SPAC16A10.04  | SPBC1604.14c  | 0.6730455 | Novel | NO  | NO  | YES | NO  |
| SPBC26H8.07c  | SPAC1250.03   | 0.6730084 | Novel | NO  | NO  | NO  | NO  |
| SPAC31G5.09c  | SPAC16.01     | 0.6722959 | Novel | NO  | NO  | NO  | NO  |
| SPAPB2B4.03   | SPBC336.12c   | 0.6717437 | Novel | NO  | YES | YES | YES |
| SPCC645.06c   | SPAC23C4.08   | 0.6709943 | Novel | NO  | YES | YES | NO  |
| SPBP8B7.25    | SPCC188.11    | 0.6707382 | Novel | NO  | NO  | NO  | NO  |
| SPCC16C4.11   | SPBC16H5.07c  | 0.6706909 | Novel | NO  | NO  | YES | NO  |
| SPBC32H8.10   | SPBC11B10.09  | 0.6697691 | Novel | NO  | YES | YES | YES |
| SPAC31G5.09c  | SPBC1685.01   | 0.6690037 | Novel | NO  | NO  | YES | NO  |
| SPAC16.01     | SPAC14C4.09   | 0.6686311 | Novel | NO  | NO  | NO  | NO  |
| SPBC3F6.05    | SPAC23C4.08   | 0.6678979 | Novel | NO  | NO  | YES | NO  |
| SPAC23C4.08   | SPAC1006.06   | 0.6676013 | Novel | NO  | YES | NO  | NO  |
| SPAC23C4.08   | SPCC1739.11c  | 0.6674422 | Novel | NO  | YES | NO  | YES |
| SPAC23C4.08   | SPCC645.07    | 0.6672186 | Novel | NO  | YES | YES | NO  |
| SPAC6F12.12   | SPBC776.02c   | 0.6670369 | Novel | NO  | NO  | NO  | NO  |
| SPAC1F7.03    | SPAC23C4.08   | 0.6669156 | Novel | NO  | YES | YES | NO  |
| SPBC26H8.07c  | SPAC20H4.11c  | 0.6666667 | Novel | NO  | YES | NO  | NO  |
| SPAC31G5.09c  | SPCC757.09c   | 0.665685  | Novel | NO  | NO  | YES | NO  |
| SPBC146.13c   | SPAP8A3.08    | 0.6643655 | Novel | YES | YES | NO  | NO  |
| SPAC24H6.03   | SPAC1250.03   | 0.6638189 | Novel | NO  | NO  | NO  | NO  |
| SPBC1D7.04    | SPAC1250.03   | 0.6635621 | Novel | NO  | NO  | NO  | NO  |
| SPCC188.02    | SPCC31H12.05c | 0.6633975 | Novel | NO  | NO  | NO  | NO  |
| SPAC20H4.11c  | SPAC14C4.09   | 0.6632972 | Novel | NO  | NO  | NO  | NO  |

|               |               |           |       |     |     |     |     |
|---------------|---------------|-----------|-------|-----|-----|-----|-----|
| SPAC31G5.09c  | SPCC1322.08   | 0.6632178 | Novel | NO  | YES | YES | NO  |
| SPBC11B10.09  | SPBC119.08    | 0.6630398 | Novel | NO  | YES | YES | NO  |
| SPAC24B11.06c | SPBC12D12.04c | 0.6630072 | Novel | NO  | YES | YES | NO  |
| SPAC4A8.05c   | SPAC3A12.14   | 0.6628188 | Novel | NO  | YES | NO  | NO  |
| SPBC4.05      | SPAC1250.03   | 0.6625    | Novel | NO  | YES | NO  | NO  |
| SPCC31H12.05c | SPBP35G2.03c  | 0.6615732 | Novel | NO  | NO  | NO  | NO  |
| SPAC110.03    | SPAC1250.03   | 0.6614672 | Novel | NO  | NO  | NO  | NO  |
| SPAC22H10.04  | SPBC26H8.05c  | 0.6613475 | Novel | NO  | YES | YES | NO  |
| SPAC31G5.09c  | SPAC23A1.06c  | 0.6610555 | Novel | NO  | YES | YES | NO  |
| SPBC428.13c   | SPBC21.06c    | 0.661001  | Novel | YES | YES | NO  | YES |
| SPAC23C4.08   | SPAC1F5.09c   | 0.6603282 | Novel | NO  | YES | NO  | NO  |
| SPBC32F12.04  | SPBC26H8.07c  | 0.6600449 | Novel | YES | YES | YES | NO  |
| SPBC582.03    | SPAC11E3.04c  | 0.6596179 | Novel | NO  | YES | NO  | NO  |
| SPCC970.10c   | SPAC11E3.04c  | 0.6595949 | Novel | NO  | YES | NO  | NO  |
| SPAC11E3.04c  | SPCC1919.15   | 0.6595137 | Novel | NO  | YES | NO  | NO  |
| SPAPB2B4.03   | SPAC644.06c   | 0.6592388 | Novel | NO  | NO  | YES | YES |
| SPCC31H12.05c | SPAC1687.15   | 0.6591961 | Novel | NO  | NO  | NO  | NO  |
| SPAC16A10.04  | SPBC21.06c    | 0.6591302 | Novel | NO  | NO  | NO  | YES |
| SPAC24H6.05   | SPAC11E3.04c  | 0.6587804 | Novel | NO  | YES | NO  | NO  |
| SPCC16C4.11   | SPAC57A7.08   | 0.6586671 | Novel | NO  | NO  | YES | NO  |
| SPAC11E3.04c  | SPBC1734.06   | 0.6585988 | Novel | NO  | YES | YES | NO  |
| SPBC1105.11c  | SPAC1687.20c  | 0.6584731 | Novel | NO  | YES | NO  | NO  |
| SPAC1834.04   | SPAC1687.20c  | 0.6584731 | Novel | NO  | NO  | NO  | NO  |
| SPBC8D2.04    | SPAC1687.20c  | 0.6584731 | Novel | NO  | NO  | NO  | NO  |
| SPBC12D12.04c | SPBC16H5.07c  | 0.6583414 | Novel | NO  | NO  | NO  | YES |
| SPAC16A10.04  | SPBC336.12c   | 0.6580737 | Novel | NO  | NO  | NO  | YES |
| SPCC16C4.11   | SPCC1739.12   | 0.6579146 | Novel | NO  | YES | NO  | NO  |
| SPAC5H10.11   | SPCC736.04c   | 0.6577655 | Novel | YES | YES | YES | NO  |
| SPAC24B11.11c | SPCC188.12    | 0.6573954 | Novel | NO  | NO  | NO  | NO  |
| SPCC18B5.03   | SPBC776.02c   | 0.6565896 | Novel | NO  | NO  | YES | YES |
| SPAC821.09    | SPAC1F7.04    | 0.6562803 | Novel | NO  | NO  | NO  | YES |
| SPCC297.03    | SPAC31G5.09c  | 0.6558096 | Novel | NO  | YES | YES | NO  |
| SPCC16C4.11   | SPBC1198.12   | 0.6544693 | Novel | NO  | YES | NO  | NO  |
| SPAC31G5.09c  | SPAC29A4.16   | 0.6544277 | Novel | NO  | YES | YES | NO  |
| SPAC22H10.04  | SPBC11B10.09  | 0.6543515 | Novel | NO  | NO  | NO  | NO  |
| SPBC23G7.12c  | SPAC3G6.02    | 0.6533454 | Novel | NO  | NO  | NO  | NO  |
| SPAC24B11.06c | SPAC1F3.02c   | 0.6526864 | Novel | YES | YES | YES | YES |
| SPAC31G5.09c  | SPAC24H6.05   | 0.6524811 | Novel | NO  | NO  | NO  | NO  |
| SPAC16A10.04  | SPAC1F7.04    | 0.6520551 | Novel | YES | YES | YES | YES |
| SPAC16A10.04  | SPAC20H4.11c  | 0.6519337 | Novel | NO  | YES | YES | NO  |
| SPAC17C9.13c  | SPBC16H5.07c  | 0.6518356 | Novel | NO  | NO  | NO  | NO  |
| SPBC428.13c   | SPAC27F1.02c  | 0.6506157 | Novel | NO  | NO  | NO  | YES |
| SPBC776.02c   | SPAC1687.15   | 0.6503212 | Novel | NO  | NO  | NO  | NO  |
| SPCC18B5.03   | SPBC19F8.07   | 0.6500214 | Novel | NO  | YES | NO  | YES |
| SPAC57A10.02  | SPAPB2B4.03   | 0.6491132 | Novel | NO  | YES | YES | YES |
| SPAC24B11.11c | SPAC2C4.14c   | 0.6488821 | Novel | NO  | YES | YES | NO  |
| SPAC824.04    | SPBC16H5.07c  | 0.6488633 | Novel | NO  | NO  | NO  | NO  |

|               |               |           |       |     |     |     |     |
|---------------|---------------|-----------|-------|-----|-----|-----|-----|
| SPAC57A7.08   | SPAC24B11.06c | 0.648662  | Novel | YES | NO  | YES | NO  |
| SPAC24H6.05   | SPBC1105.09   | 0.648473  | Novel | NO  | NO  | NO  | NO  |
| SPAC17G6.16c  | SPBC16H5.07c  | 0.6484457 | Novel | NO  | NO  | NO  | NO  |
| SPAC1F7.04    | SPBC26H8.07c  | 0.6480314 | Novel | NO  | YES | NO  | NO  |
| SPBC16H5.07c  | SPAC4A8.12c   | 0.6478769 | Novel | YES | NO  | NO  | NO  |
| SPAC16A10.04  | SPCC1739.11c  | 0.6473165 | Novel | NO  | NO  | YES | YES |
| SPAC16A10.04  | SPAC2E1P5.04c | 0.6470788 | Novel | NO  | NO  | NO  | NO  |
| SPBC11B10.09  | SPAC1F5.09c   | 0.6470024 | Novel | NO  | YES | YES | YES |
| SPCC31H12.05c | SPAC6F12.12   | 0.6464142 | Novel | NO  | NO  | NO  | NO  |
| SPBC16H5.07c  | SPBC25B2.05   | 0.6462003 | Novel | NO  | NO  | NO  | YES |
| SPAC31G5.09c  | SPCC18B5.03   | 0.6461103 | Novel | NO  | YES | NO  | NO  |
| SPAPB2B4.02   | SPAC4F10.20   | 0.6455733 | Novel | NO  | YES | YES | NO  |
| SPBC660.14    | SPAC821.08c   | 0.6449059 | Novel | NO  | NO  | YES | YES |
| SPBC119.02    | SPBC800.05c   | 0.6448946 | Novel | NO  | NO  | NO  | NO  |
| SPAC1F7.04    | SPAC14C4.09   | 0.6448897 | Novel | NO  | NO  | NO  | YES |
| SPBC1105.11c  | SPAC16A10.05c | 0.6446516 | Novel | NO  | NO  | NO  | NO  |
| SPAC16A10.05c | SPBC8D2.04    | 0.6446516 | Novel | NO  | NO  | NO  | NO  |
| SPAC16A10.05c | SPAC1834.04   | 0.6446516 | Novel | NO  | NO  | NO  | NO  |
| SPCC16C4.11   | SPBC32H8.10   | 0.644637  | Novel | NO  | YES | YES | NO  |
| SPBC428.13c   | SPAC1834.06c  | 0.6445026 | Novel | YES | YES | YES | NO  |
| SPAC6F12.15c  | SPBC16H5.07c  | 0.6444755 | Novel | NO  | NO  | NO  | NO  |
| SPAC16A10.04  | SPBC3F6.05    | 0.6439905 | Novel | NO  | NO  | YES | NO  |
| SPBC428.13c   | SPAC4A8.15c   | 0.6435428 | Novel | NO  | NO  | NO  | NO  |
| SPAC18B11.07c | SPCC338.05c   | 0.6434975 | Novel | NO  | YES | YES | NO  |
| SPBC32C12.02  | SPBC119.08    | 0.6434591 | Novel | NO  | NO  | NO  | NO  |
| SPAC16A10.04  | SPAC1006.06   | 0.643337  | Novel | YES | NO  | NO  | NO  |
| SPBC1778.04   | SPBC776.12c   | 0.6432895 | Novel | NO  | NO  | YES | NO  |
| SPCC622.09    | SPBC16H5.07c  | 0.6425157 | Novel | NO  | NO  | NO  | NO  |
| SPBP4H10.04   | SPAC9E9.07c   | 0.6424567 | Novel | NO  | NO  | NO  | NO  |
| SPAC16A10.04  | SPAC1F7.03    | 0.6423819 | Novel | NO  | NO  | YES | NO  |
| SPBC428.08c   | SPBC800.05c   | 0.6423592 | Novel | NO  | NO  | NO  | NO  |
| SPAC16A10.04  | SPCC645.06c   | 0.642001  | Novel | NO  | NO  | YES | NO  |
| SPAC16A10.04  | SPBC4F6.12    | 0.6418102 | Novel | NO  | NO  | YES | NO  |
| SPAC16A10.04  | SPCC645.07    | 0.6415606 | Novel | YES | NO  | NO  | NO  |
| SPCC16C4.11   | SPAC1F5.09c   | 0.6404357 | Novel | NO  | YES | YES | NO  |
| SPCC1739.11c  | SPAC2C4.14c   | 0.6399883 | Novel | YES | NO  | NO  | NO  |
| SPAC57A10.03  | SPAC644.12    | 0.6396063 | Novel | NO  | YES | NO  | NO  |
| SPAC16A10.04  | SPAC1F5.09c   | 0.6393974 | Novel | NO  | NO  | NO  | NO  |
| SPBC19C7.03   | SPAC31G5.09c  | 0.6391734 | Novel | NO  | YES | NO  | NO  |
| SPCC18B5.03   | SPCC31H12.05c | 0.6389601 | Novel | NO  | NO  | NO  | NO  |
| SPCC188.12    | SPBC16A3.01   | 0.6382046 | Novel | YES | YES | NO  | NO  |
| SPAC17H9.09c  | SPBC23G7.12c  | 0.6382031 | Novel | NO  | NO  | NO  | NO  |
| SPAC24B11.11c | SPAPB18E9.04c | 0.6380948 | Novel | NO  | NO  | NO  | NO  |
| SPAC664.01c   | SPBC800.05c   | 0.6380221 | Novel | NO  | NO  | NO  | YES |
| SPCC188.12    | SPAC9G1.11c   | 0.6379018 | Novel | YES | YES | NO  | NO  |
| SPCC18B5.03   | SPBC16H5.10c  | 0.6376642 | Novel | NO  | YES | NO  | NO  |
| SPAC31G5.09c  | SPBC29B5.01   | 0.6371348 | Novel | NO  | NO  | NO  | NO  |



|              |              |           |       |     |     |     |     |
|--------------|--------------|-----------|-------|-----|-----|-----|-----|
| SPCC16C4.09  | SPBC776.02c  | 0.6370521 | Novel | YES | NO  | NO  | YES |
| SPAC20H4.11c | SPBC1685.02c | 0.6370294 | Novel | NO  | NO  | NO  | NO  |
| SPAC24H6.05  | SPBC776.02c  | 0.6370276 | Novel | YES | YES | YES | YES |
| SPAC16A10.04 | SPCC970.09   | 0.6367847 | Novel | NO  | NO  | NO  | YES |
| SPAC16A10.04 | SPCC895.05   | 0.6366874 | Novel | NO  | NO  | YES | NO  |
| SPAC23C11.11 | SPBC16H5.10c | 0.6365815 | Novel | NO  | YES | NO  | NO  |
| SPAC31G5.09c | SPAC11G7.02  | 0.6365492 | Novel | NO  | NO  | NO  | NO  |
| SPAC8E11.02c | SPBC16H5.10c | 0.6364764 | Novel | NO  | NO  | NO  | NO  |
| SPAC16A10.04 | SPBC106.20   | 0.6362617 | Novel | NO  | NO  | NO  | NO  |
| SPCC188.12   | SPAC4F10.11  | 0.636128  | Novel | YES | YES | NO  | NO  |
| SPAC31G5.09c | SPAC1805.17  | 0.6360696 | Novel | NO  | NO  | NO  | NO  |
| SPBC26H8.07c | SPAC23C4.08  | 0.6360378 | Novel | NO  | YES | YES | NO  |
| SPCC736.04c  | SPAC5H10.13c | 0.6360083 | Novel | YES | YES | YES | NO  |
| SPBC16A3.15c | SPBC428.08c  | 0.6359444 | Novel | NO  | NO  | NO  | YES |
| SPAC31G5.09c | SPCC576.03c  | 0.6358873 | Novel | NO  | NO  | NO  | NO  |
| SPBC582.03   | SPBC16H5.10c | 0.6358278 | Novel | NO  | NO  | NO  | NO  |
| SPAC31G5.09c | SPAC19D5.01  | 0.6356908 | Novel | NO  | NO  | NO  | NO  |
| SPAC31G5.09c | SPCC4F11.02  | 0.6356146 | Novel | NO  | NO  | NO  | NO  |
| SPAC31G5.09c | SPBC9B6.10   | 0.6355749 | Novel | NO  | NO  | NO  | NO  |
| SPBC16A3.15c | SPBC119.02   | 0.6355003 | Novel | NO  | NO  | NO  | NO  |
| SPAC31G5.09c | SPCC5E4.04   | 0.6354551 | Novel | NO  | NO  | NO  | NO  |
| SPAC821.06   | SPCC188.12   | 0.6354411 | Novel | YES | YES | NO  | NO  |
| SPAC31G5.09c | SPAPYUG7.02c | 0.6352099 | Novel | NO  | NO  | YES | NO  |
| SPAC31G5.09c | SPAC17A2.09c | 0.6351524 | Novel | NO  | NO  | NO  | NO  |
| SPAC31G5.09c | SPBC2F12.09c | 0.6350921 | Novel | NO  | NO  | NO  | NO  |
| SPAC31G5.09c | SPAC977.10   | 0.6350278 | Novel | NO  | NO  | NO  | NO  |
| SPAC31G5.09c | SPBC1A4.02c  | 0.6350035 | Novel | NO  | NO  | NO  | NO  |
| SPAC31G5.09c | SPAC1783.07c | 0.6349914 | Novel | NO  | NO  | NO  | NO  |
| SPAC1834.04  | SPBC21.01    | 0.6349091 | Novel | NO  | NO  | NO  | NO  |
| SPBC1105.11c | SPBC21.01    | 0.6349091 | Novel | NO  | YES | NO  | NO  |
| SPBC8D2.04   | SPBC21.01    | 0.6349091 | Novel | NO  | NO  | NO  | NO  |
| SPAC31G5.09c | SPAC26F1.10c | 0.6347796 | Novel | NO  | NO  | NO  | NO  |
| SPAC1834.04  | SPAC1834.03c | 0.6347171 | Novel | YES | YES | YES | YES |
| SPBC1105.11c | SPAC1834.03c | 0.6347171 | Novel | YES | YES | YES | NO  |
| SPBC8D2.04   | SPAC1834.03c | 0.6347171 | Novel | YES | YES | YES | YES |
| SPAC1834.04  | SPBC8D2.03c  | 0.6347171 | Novel | YES | YES | YES | YES |
| SPBC1105.11c | SPBC8D2.03c  | 0.6347171 | Novel | YES | YES | YES | NO  |
| SPBC8D2.04   | SPBC8D2.03c  | 0.6347171 | Novel | YES | YES | YES | YES |
| SPAC1834.04  | SPBC1105.12  | 0.6347171 | Novel | YES | YES | YES | NO  |
| SPBC1105.11c | SPBC1105.12  | 0.6347171 | Novel | YES | YES | YES | NO  |
| SPBC8D2.04   | SPBC1105.12  | 0.6347171 | Novel | YES | YES | YES | NO  |
| SPAC18G6.02c | SPBC26H8.07c | 0.6338592 | Novel | NO  | NO  | NO  | YES |
| SPAC1834.04  | SPBC18E5.03c | 0.6337706 | Novel | NO  | NO  | YES | NO  |
| SPBC1105.11c | SPBC18E5.03c | 0.6337706 | Novel | NO  | YES | YES | NO  |
| SPBC8D2.04   | SPBC18E5.03c | 0.6337706 | Novel | NO  | NO  | YES | NO  |
| SPBC24C6.07  | SPBC11B10.09 | 0.6336632 | Novel | NO  | YES | NO  | YES |
| SPCC4B3.16   | SPBC776.02c  | 0.6335628 | Novel | YES | NO  | NO  | NO  |

|               |               |           |       |     |     |     |     |
|---------------|---------------|-----------|-------|-----|-----|-----|-----|
| SPCC1672.10   | SPBC8D2.04    | 0.63356   | Novel | NO  | NO  | NO  | NO  |
| SPCC1672.10   | SPAC1834.04   | 0.63356   | Novel | NO  | NO  | NO  | NO  |
| SPCC1672.10   | SPBC1105.11c  | 0.63356   | Novel | NO  | YES | NO  | NO  |
| SPAC821.09    | SPAC23C4.08   | 0.6330281 | Novel | NO  | NO  | NO  | YES |
| SPBC1105.11c  | SPCC622.09    | 0.6327183 | Novel | NO  | YES | YES | YES |
| SPBC8D2.04    | SPCC622.09    | 0.6327183 | Novel | NO  | YES | NO  | YES |
| SPCC622.09    | SPAC1834.04   | 0.6327183 | Novel | NO  | YES | YES | YES |
| SPAC1834.04   | SPCC290.04    | 0.6325669 | Novel | NO  | NO  | NO  | NO  |
| SPBC1105.11c  | SPCC290.04    | 0.6325669 | Novel | NO  | NO  | NO  | NO  |
| SPBC8D2.04    | SPCC290.04    | 0.6325669 | Novel | NO  | NO  | NO  | NO  |
| SPAC24B11.11c | SPAC821.06    | 0.6325331 | Novel | NO  | YES | NO  | YES |
| SPAC1834.04   | SPBP22H7.09c  | 0.6325006 | Novel | NO  | NO  | NO  | NO  |
| SPBC1105.11c  | SPBP22H7.09c  | 0.6325006 | Novel | NO  | YES | NO  | NO  |
| SPBC8D2.04    | SPBP22H7.09c  | 0.6325006 | Novel | NO  | NO  | NO  | NO  |
| SPCC1739.12   | SPBC119.08    | 0.6323466 | Novel | NO  | YES | YES | YES |
| SPAC6B12.15   | SPAC17G8.14c  | 0.6322961 | Novel | NO  | YES | YES | YES |
| SPAC1834.04   | SPCC970.12    | 0.6322901 | Novel | NO  | NO  | NO  | NO  |
| SPBC1105.11c  | SPCC970.12    | 0.6322901 | Novel | NO  | YES | NO  | NO  |
| SPBC8D2.04    | SPCC970.12    | 0.6322901 | Novel | NO  | NO  | NO  | NO  |
| SPCC16C4.11   | SPAC31G5.09c  | 0.6322441 | Novel | NO  | YES | YES | NO  |
| SPAC24H6.05   | SPAC2C4.14c   | 0.6319967 | Novel | NO  | NO  | NO  | NO  |
| SPAC16A10.04  | SPBC16A3.15c  | 0.6309459 | Novel | NO  | YES | YES | NO  |
| SPAC6F6.15    | SPAC4C5.02c   | 0.6307234 | Novel | NO  | YES | YES | NO  |
| SPAC22H10.10  | SPBC26H8.07c  | 0.6306972 | Novel | NO  | NO  | NO  | YES |
| SPAC24H6.05   | SPCC31H12.05c | 0.6306719 | Novel | NO  | YES | NO  | NO  |
| SPAC16.01     | SPAC23C4.08   | 0.6300422 | Novel | NO  | YES | YES | YES |
| SPBC8D2.09c   | SPAC19A8.13   | 0.6300305 | Novel | NO  | NO  | YES | NO  |
| SPAC821.12    | SPAC2C4.14c   | 0.6298976 | Novel | NO  | YES | YES | NO  |
| SPAC18G6.15   | SPBC26H8.07c  | 0.6297497 | Novel | NO  | NO  | YES | NO  |
| SPAC19G12.14  | SPAC17G8.14c  | 0.6295035 | Novel | NO  | YES | YES | YES |
| SPAC23C4.08   | SPAC14C4.09   | 0.6293243 | Novel | NO  | NO  | NO  | YES |
| SPBC21.06c    | SPAC6F12.12   | 0.6293066 | Novel | NO  | NO  | NO  | YES |
| SPAC31G5.09c  | SPAC1F7.04    | 0.629081  | Novel | NO  | NO  | NO  | NO  |
| SPBC24C6.07   | SPAC2C4.14c   | 0.6286195 | Novel | NO  | NO  | NO  | NO  |
| SPAC24B11.06c | SPBP4H10.04   | 0.6283874 | Novel | NO  | NO  | NO  | NO  |
| SPBC1198.12   | SPAC144.13c   | 0.6277505 | Novel | YES | NO  | NO  | NO  |
| SPBC21.06c    | SPAC2C4.14c   | 0.6273057 | Novel | NO  | YES | YES | NO  |
| SPAC16A10.04  | SPBC800.05c   | 0.6270096 | Novel | NO  | YES | YES | NO  |
| SPAC110.03    | SPCC970.09    | 0.6269865 | Novel | YES | YES | NO  | NO  |
| SPAC110.03    | SPBC106.20    | 0.6267312 | Novel | YES | YES | NO  | NO  |
| SPAC1782.09c  | SPBC19F8.07   | 0.6254948 | Novel | YES | NO  | NO  | YES |
| SPCC16C4.11   | SPBC24C6.07   | 0.6252755 | Novel | NO  | YES | NO  | NO  |
| SPAC23A1.06c  | SPBC19F8.07   | 0.6252512 | Novel | YES | YES | YES | YES |
| SPBC12D12.04c | SPBC26H8.05c  | 0.6251886 | Novel | NO  | NO  | NO  | NO  |
| SPBC3D6.04c   | SPBC26H8.07c  | 0.6249452 | Novel | NO  | NO  | NO  | NO  |
| SPCC24B10.07  | SPBC106.10    | 0.624905  | Novel | NO  | YES | YES | NO  |
| SPAC17D4.03c  | SPAC9E9.07c   | 0.6247278 | Novel | NO  | NO  | NO  | NO  |

|               |               |           |       |     |     |     |     |
|---------------|---------------|-----------|-------|-----|-----|-----|-----|
| SPBC1703.10   | SPAC4C5.02c   | 0.6246715 | Novel | NO  | YES | YES | NO  |
| SPBC11B10.09  | SPBC26H8.05c  | 0.6244889 | Novel | NO  | NO  | NO  | NO  |
| SPAC17G8.14c  | SPAC1F5.08c   | 0.6242777 | Novel | NO  | NO  | NO  | YES |
| SPCC16C4.11   | SPAC1D4.13    | 0.6241995 | Novel | NO  | YES | YES | NO  |
| SPAC9E9.10c   | SPCC364.02c   | 0.6240875 | Novel | NO  | NO  | NO  | YES |
| SPAC24B11.11c | SPAC821.12    | 0.6235223 | Novel | NO  | YES | YES | YES |
| SPAC3G6.01    | SPAC1250.01   | 0.6232844 | Novel | YES | YES | YES | NO  |
| SPAC31G5.09c  | SPBC776.02c   | 0.6223097 | Novel | NO  | NO  | NO  | NO  |
| SPAC23E2.02   | SPAC3G6.01    | 0.6222309 | Novel | YES | YES | YES | YES |
| SPBC26H8.07c  | SPCC1322.12c  | 0.6220843 | Novel | NO  | NO  | NO  | YES |
| SPAC6F6.08c   | SPAC2C4.14c   | 0.621587  | Novel | NO  | NO  | NO  | NO  |
| SPBC582.03    | SPBC16E9.17c  | 0.6215284 | Novel | NO  | YES | YES | YES |
| SPAC2F3.15    | SPAC2C4.14c   | 0.620768  | Novel | NO  | YES | NO  | NO  |
| SPCC31H12.05c | SPCC4B3.16    | 0.6206462 | Novel | NO  | NO  | NO  | NO  |
| SPBC4.04c     | SPBC26H8.07c  | 0.6205841 | Novel | NO  | NO  | NO  | NO  |
| SPBC409.07c   | SPBC119.08    | 0.6205718 | Novel | YES | YES | YES | YES |
| SPAC1687.20c  | SPAC3G6.01    | 0.6204806 | Novel | NO  | YES | NO  | YES |
| SPAC31G5.09c  | SPCC31H12.05c | 0.6203686 | Novel | NO  | NO  | NO  | NO  |
| SPAC110.03    | SPBC12D12.07c | 0.6200839 | Novel | NO  | NO  | NO  | NO  |
| SPBC16A3.15c  | SPAC664.01c   | 0.6196149 | Novel | NO  | NO  | NO  | YES |
| SPBC336.12c   | SPBC800.05c   | 0.6193912 | Novel | NO  | NO  | NO  | NO  |
| SPCC16C4.09   | SPCC31H12.05c | 0.6192516 | Novel | NO  | NO  | NO  | NO  |
| SPAC22H10.04  | SPBC12D12.04c | 0.6190899 | Novel | NO  | NO  | NO  | NO  |
| SPBC26H8.07c  | SPAC23H3.08c  | 0.6187069 | Novel | NO  | NO  | NO  | NO  |
| SPBC11C11.04c | SPBC800.05c   | 0.6186666 | Novel | NO  | NO  | YES | YES |
| SPAC18G6.03   | SPAC6F6.15    | 0.6183494 | Novel | NO  | YES | YES | NO  |
| SPAC24B11.06c | SPBC776.02c   | 0.6179949 | Novel | YES | NO  | NO  | YES |
| SPBC26H8.07c  | SPBC32H8.12c  | 0.6178924 | Novel | NO  | NO  | YES | YES |
| SPBC19C2.05   | SPAC2C4.14c   | 0.6173691 | Novel | NO  | YES | YES | NO  |
| SPAC24B11.06c | SPAC16.01     | 0.6172778 | Novel | NO  | YES | NO  | NO  |
| SPBC1604.14c  | SPBC19F8.07   | 0.6170044 | Novel | NO  | YES | YES | YES |
| SPAC1F7.04    | SPAC11E3.04c  | 0.6168933 | Novel | NO  | YES | NO  | NO  |
| SPBC1198.12   | SPBC30D10.10c | 0.616808  | Novel | NO  | NO  | NO  | NO  |
| SPAC637.07    | SPBC26H8.07c  | 0.6165118 | Novel | NO  | NO  | NO  | NO  |
| SPBC26H8.07c  | SPAC30C2.02   | 0.6160785 | Novel | NO  | NO  | YES | NO  |
| SPAC24B11.06c | SPBC1685.01   | 0.6158301 | Novel | YES | YES | NO  | NO  |
| SPAC31G5.11   | SPBC26H8.07c  | 0.6156652 | Novel | NO  | NO  | NO  | NO  |
| SPAC18G6.03   | SPAC9E9.07c   | 0.6151863 | Novel | NO  | YES | YES | YES |
| SPBC800.05c   | SPCC11E10.08  | 0.6151561 | Novel | NO  | NO  | NO  | NO  |
| SPBC4.05      | SPBC800.05c   | 0.6148762 | Novel | NO  | NO  | NO  | NO  |
| SPAC9E9.10c   | SPCC16A11.17  | 0.6146306 | Novel | NO  | NO  | NO  | YES |
| SPAC6F12.12   | SPCC1739.11c  | 0.6145881 | Novel | YES | NO  | NO  | YES |
| SPBC1D7.04    | SPBC800.05c   | 0.6141602 | Novel | NO  | NO  | NO  | NO  |
| SPBC800.05c   | SPAC1786.03   | 0.6140854 | Novel | NO  | NO  | NO  | NO  |
| SPAP8A3.04c   | SPAC23C4.08   | 0.613781  | Novel | NO  | NO  | NO  | NO  |
| SPAPB2B4.03   | SPAC2G11.12   | 0.6135565 | Novel | NO  | YES | NO  | YES |
| SPAC8E11.07c  | SPBC800.05c   | 0.6134651 | Novel | NO  | NO  | NO  | YES |

|               |               |           |       |     |     |     |     |
|---------------|---------------|-----------|-------|-----|-----|-----|-----|
| SPAC5D6.08c   | SPAC144.13c   | 0.6128446 | Novel | NO  | NO  | NO  | YES |
| SPBC582.03    | SPBP16F5.04   | 0.6127738 | Novel | NO  | NO  | NO  | NO  |
| SPBP16F5.04   | SPCC1919.15   | 0.61272   | Novel | NO  | YES | NO  | NO  |
| SPCC970.10c   | SPBP16F5.04   | 0.6124507 | Novel | NO  | YES | NO  | NO  |
| SPAC24B11.06c | SPCC757.09c   | 0.6120892 | Novel | NO  | YES | NO  | NO  |
| SPAC24H6.05   | SPBP16F5.04   | 0.6120445 | Novel | NO  | NO  | NO  | NO  |
| SPBP16F5.04   | SPBC1734.06   | 0.6120416 | Novel | NO  | YES | YES | NO  |
| SPAC17D4.02   | SPAC9E9.10c   | 0.6119678 | Novel | YES | YES | NO  | YES |
| SPCC16C4.11   | SPAC24C9.07c  | 0.6118444 | Novel | NO  | NO  | NO  | NO  |
| SPAC9.10      | SPCC965.13    | 0.6118375 | Novel | YES | NO  | NO  | NO  |
| SPBC119.08    | SPBC16H5.07c  | 0.6118304 | Novel | YES | NO  | NO  | YES |
| SPAC31G5.09c  | SPAC20H4.11c  | 0.6114128 | Novel | NO  | NO  | NO  | NO  |
| SPBC211.04c   | SPCC1682.02c  | 0.6113575 | Novel | YES | YES | YES | YES |
| SPAC24B11.06c | SPCC31H12.05c | 0.6112811 | Novel | NO  | NO  | NO  | NO  |
| SPCC1682.16   | SPAC3G6.02    | 0.6112675 | Novel | NO  | NO  | YES | NO  |
| SPAPB2B4.03   | SPAC6F12.15c  | 0.6110594 | Novel | NO  | YES | NO  | YES |
| SPCC16C4.07   | SPAC2C4.14c   | 0.6108711 | Novel | NO  | NO  | NO  | NO  |
| SPAC6F12.12   | SPCC4B3.15    | 0.6105022 | Novel | NO  | NO  | NO  | YES |
| SPBC244.01c   | SPAC2C4.14c   | 0.6104104 | Novel | NO  | NO  | NO  | NO  |
| SPAC57A10.03  | SPCC188.11    | 0.6104035 | Novel | NO  | YES | NO  | NO  |
| SPAC6F12.12   | SPAC1565.06c  | 0.6101514 | Novel | NO  | NO  | NO  | YES |
| SPBC16A3.15c  | SPBC11C11.04c | 0.6100981 | Novel | NO  | NO  | YES | YES |
| SPAPB2B4.03   | SPCC1739.11c  | 0.6100942 | Novel | YES | YES | NO  | YES |
| SPBC16A3.15c  | SPBC336.12c   | 0.6098464 | Novel | NO  | NO  | NO  | YES |
| SPBC32F12.06  | SPBC19F8.07   | 0.609672  | Novel | NO  | NO  | NO  | YES |
| SPAC1D4.13    | SPBC11B10.09  | 0.6090455 | Novel | NO  | YES | YES | NO  |
| SPBC31F10.13c | SPAC9E9.10c   | 0.6089548 | Novel | YES | YES | YES | YES |
| SPBC582.03    | SPBC1105.09   | 0.6089399 | Novel | NO  | NO  | NO  | NO  |
| SPCC16C4.11   | SPAC6F6.08c   | 0.608829  | Novel | NO  | YES | NO  | NO  |
| SPCC970.10c   | SPBC1105.09   | 0.6087828 | Novel | NO  | YES | NO  | NO  |
| SPAC6F6.08c   | SPAC6F12.12   | 0.6082942 | Novel | NO  | NO  | NO  | YES |
| SPAC16.01     | SPBC1685.02c  | 0.6081631 | Novel | NO  | NO  | NO  | NO  |
| SPAPB2B4.03   | SPBC646.09c   | 0.6080426 | Novel | NO  | YES | NO  | YES |
| SPBC1105.09   | SPCC1919.15   | 0.6080077 | Novel | NO  | YES | NO  | NO  |
| SPAC110.03    | SPBC26H8.07c  | 0.6077988 | Novel | NO  | YES | NO  | YES |
| SPBC1105.09   | SPBC1734.06   | 0.6077776 | Novel | NO  | YES | YES | NO  |
| SPCC16C4.09   | SPBC12D12.04c | 0.6071356 | Novel | YES | NO  | NO  | YES |
| SPAC110.03    | SPAC23C4.08   | 0.6069364 | Novel | NO  | YES | YES | YES |
| SPBC16A3.15c  | SPCC11E10.08  | 0.6065941 | Novel | NO  | NO  | NO  | NO  |
| SPBC4.05      | SPBC16A3.15c  | 0.606311  | Novel | NO  | NO  | NO  | NO  |
| SPAC9E9.10c   | SPBC25H2.13c  | 0.6062941 | Novel | NO  | NO  | NO  | YES |
| SPAC17C9.01c  | SPAPB2B4.03   | 0.606203  | Novel | NO  | YES | NO  | YES |
| SPBC336.04    | SPAC9E9.10c   | 0.6061742 | Novel | NO  | YES | NO  | YES |
| SPAC9E9.10c   | SPAC27E2.05   | 0.6061427 | Novel | NO  | YES | NO  | YES |
| SPAC9E9.10c   | SPBC14C8.07c  | 0.6060461 | Novel | NO  | NO  | NO  | YES |
| SPBC29A10.15  | SPAC9E9.10c   | 0.6060107 | Novel | YES | NO  | NO  | YES |
| SPBC800.03    | SPAC9E9.10c   | 0.605979  | Novel | YES | NO  | YES | YES |

|               |               |           |       |     |     |     |     |
|---------------|---------------|-----------|-------|-----|-----|-----|-----|
| SPBC16A3.15c  | SPBC1D7.04    | 0.6058614 | Novel | NO  | NO  | NO  | NO  |
| SPBC36.05c    | SPAC9E9.10c   | 0.6058565 | Novel | YES | YES | YES | YES |
| SPAP8A3.09c   | SPAC6F12.12   | 0.6057701 | Novel | YES | YES | NO  | YES |
| SPBC409.04c   | SPAC9E9.10c   | 0.6057492 | Novel | NO  | YES | YES | YES |
| SPBC428.13c   | SPAC6F12.12   | 0.6056076 | Novel | YES | NO  | NO  | YES |
| SPAPB2B4.03   | SPBC19C2.01   | 0.6055054 | Novel | NO  | NO  | NO  | YES |
| SPBC16A3.15c  | SPAC1786.03   | 0.605477  | Novel | NO  | NO  | NO  | NO  |
| SPAC6F12.12   | SPBP35G2.03c  | 0.6054057 | Novel | NO  | NO  | NO  | YES |
| SPBC8D2.01    | SPCC31H12.05c | 0.6054009 | Novel | NO  | NO  | NO  | NO  |
| SPAC6F12.12   | SPBC29A10.14  | 0.6053299 | Novel | NO  | NO  | NO  | YES |
| SPAPB2B4.03   | SPAC18B11.07c | 0.605133  | Novel | NO  | NO  | NO  | YES |
| SPBC16A3.15c  | SPAC8E11.07c  | 0.6051147 | Novel | NO  | NO  | NO  | YES |
| SPAPB2B4.03   | SPBC25B2.05   | 0.6048238 | Novel | NO  | NO  | NO  | YES |
| SPAPB2B4.03   | SPBP16F5.02   | 0.6047013 | Novel | NO  | YES | YES | YES |
| SPBC16G5.12c  | SPAPB2B4.03   | 0.6046722 | Novel | NO  | YES | NO  | YES |
| SPAPB2B4.03   | SPAC9E9.13    | 0.6045613 | Novel | NO  | YES | YES | YES |
| SPCC576.10c   | SPAC17H9.09c  | 0.604527  | Novel | NO  | NO  | NO  | NO  |
| SPAPB2B4.03   | SPBC32H8.12c  | 0.6044915 | Novel | NO  | NO  | NO  | YES |
| SPBC3H7.15    | SPBP35G2.05c  | 0.6025039 | Novel | NO  | YES | YES | NO  |
| SPAC1F7.04    | SPAC18B11.07c | 0.6005133 | Novel | NO  | NO  | NO  | NO  |
| SPCC16C4.11   | SPBC119.08    | 0.6003487 | Novel | NO  | YES | YES | NO  |
| SPAC24B11.06c | SPAC1D4.06c   | 0.5997149 | Novel | NO  | YES | YES | YES |
| SPAC1D4.13    | SPAC1F3.02c   | 0.5996019 | Novel | NO  | YES | YES | NO  |
| SPAC19D5.01   | SPBC19F8.07   | 0.5991942 | Novel | YES | NO  | NO  | YES |
| SPAC18G6.03   | SPBC1703.10   | 0.5990245 | Novel | NO  | YES | YES | NO  |
| SPAC24B11.11c | SPBC17F3.02   | 0.5990049 | Novel | YES | YES | YES | NO  |
| SPBC8D2.01    | SPBC776.02c   | 0.5986493 | Novel | YES | NO  | NO  | NO  |
| SPBC146.13c   | SPBC1347.12   | 0.598625  | Novel | NO  | NO  | NO  | NO  |
| SPCC1259.15c  | SPAC24H6.05   | 0.5985605 | Novel | YES | NO  | YES | NO  |
| SPAC16A10.04  | SPAC16.01     | 0.5979462 | Novel | NO  | YES | YES | NO  |
| SPAC110.03    | SPAC821.09    | 0.5977296 | Novel | NO  | NO  | NO  | NO  |
| SPAC6F12.13c  | SPAC17G6.04c  | 0.5973258 | Novel | NO  | YES | NO  | NO  |
| SPAP8A3.08    | SPCC1919.10c  | 0.5964224 | Novel | YES | NO  | NO  | YES |
| SPAC17G8.14c  | SPBC776.02c   | 0.5962935 | Novel | NO  | NO  | NO  | NO  |
| SPBC1D7.05    | SPAC2C4.14c   | 0.5960858 | Novel | NO  | YES | YES | NO  |
| SPCC31H12.05c | SPAC17G8.14c  | 0.5955205 | Novel | NO  | NO  | NO  | NO  |
| SPBC582.03    | SPBC19C2.05   | 0.5952982 | Novel | NO  | YES | NO  | YES |
| SPAC1D4.06c   | SPBC18H10.15  | 0.5952856 | Novel | NO  | YES | YES | NO  |
| SPBC11B10.09  | SPAC2C4.14c   | 0.5952071 | Novel | NO  | YES | YES | NO  |
| SPBP35G2.05c  | SPAC23C4.12   | 0.5948478 | Novel | NO  | YES | YES | NO  |
| SPCC576.10c   | SPAC637.10c   | 0.5947153 | Novel | YES | NO  | YES | YES |
| SPBP4H10.04   | SPAC4C5.02c   | 0.5941378 | Novel | NO  | NO  | NO  | YES |
| SPCC576.10c   | SPAC4D7.05    | 0.5941223 | Novel | NO  | NO  | NO  | NO  |
| SPAC1805.15c  | SPAC24B11.06c | 0.5935443 | Novel | YES | NO  | NO  | YES |
| SPAC16A10.04  | SPAPB18E9.04c | 0.5932751 | Novel | NO  | NO  | NO  | NO  |
| SPBC18H10.02  | SPBC409.05    | 0.5931142 | Novel | NO  | NO  | NO  | NO  |
| SPCC970.01    | SPBC23G7.11   | 0.5926949 | Novel | NO  | NO  | NO  | NO  |

|               |               |           |       |     |     |     |     |
|---------------|---------------|-----------|-------|-----|-----|-----|-----|
| SPCC16C4.11   | SPAC19B12.03  | 0.5925778 | Novel | NO  | NO  | NO  | NO  |
| SPBC3D6.10    | SPBC23G7.11   | 0.5925176 | Novel | NO  | NO  | YES | YES |
| SPAC3G6.06c   | SPBC23G7.11   | 0.5924123 | Novel | NO  | NO  | NO  | NO  |
| SPCC576.10c   | SPBC646.09c   | 0.5923797 | Novel | YES | NO  | NO  | NO  |
| SPAC3C7.03c   | SPBC23G7.11   | 0.5923786 | Novel | NO  | NO  | NO  | NO  |
| SPCC576.10c   | SPAC1420.03   | 0.5922616 | Novel | NO  | NO  | NO  | YES |
| SPCC576.10c   | SPAPB8E5.02c  | 0.5922616 | Novel | NO  | NO  | NO  | NO  |
| SPAC18G6.03   | SPCC895.07    | 0.5921194 | Novel | NO  | NO  | NO  | NO  |
| SPCC576.10c   | SPBC409.06    | 0.5920554 | Novel | YES | NO  | YES | YES |
| SPCC576.10c   | SPBP19A11.03c | 0.5920314 | Novel | YES | YES | NO  | NO  |
| SPCC576.10c   | SPAC6G9.08    | 0.5918919 | Novel | NO  | NO  | YES | NO  |
| SPBC18E5.03c  | SPBC1348.08c  | 0.5918907 | Novel | NO  | NO  | NO  | NO  |
| SPAC977.07c   | SPBC18E5.03c  | 0.5918907 | Novel | NO  | NO  | NO  | NO  |
| SPBC582.03    | SPAC22F3.09c  | 0.5918807 | Novel | NO  | YES | NO  | YES |
| SPAC977.07c   | SPAC25B8.14   | 0.5917089 | Novel | NO  | NO  | NO  | NO  |
| SPAC25B8.14   | SPBC1348.08c  | 0.5917089 | Novel | NO  | NO  | NO  | NO  |
| SPAC110.03    | SPBC4.07c     | 0.5913201 | Novel | NO  | YES | NO  | NO  |
| SPBC1289.13c  | SPAC5H10.11   | 0.5911834 | Novel | YES | YES | YES | NO  |
| SPAC4C5.04    | SPBP35G2.05c  | 0.5911542 | Novel | NO  | NO  | NO  | NO  |
| SPAC7D4.07c   | SPAC23C4.08   | 0.5910778 | Novel | NO  | NO  | NO  | NO  |
| SPAC23C4.08   | SPAC16E8.09   | 0.5908999 | Novel | NO  | YES | NO  | NO  |
| SPAC16A10.05c | SPAC977.07c   | 0.5907946 | Novel | NO  | NO  | NO  | NO  |
| SPAC16A10.05c | SPBC1348.08c  | 0.5907946 | Novel | NO  | NO  | NO  | NO  |
| SPAC26F1.10c  | SPBC19F8.07   | 0.5901929 | Novel | NO  | NO  | NO  | YES |
| SPAC24H6.09   | SPAC23C4.08   | 0.5899109 | Novel | NO  | YES | YES | NO  |
| SPBC582.03    | SPBC725.16    | 0.5897901 | Novel | NO  | NO  | NO  | YES |
| SPBC1604.14c  | SPAC2C4.14c   | 0.589712  | Novel | YES | YES | YES | NO  |
| SPCC16C4.11   | SPAC22H10.04  | 0.5895808 | Novel | NO  | NO  | YES | NO  |
| SPBC18H10.15  | SPAC1782.09c  | 0.5894449 | Novel | NO  | NO  | NO  | NO  |
| SPAC6G10.12c  | SPAC2C4.14c   | 0.5888766 | Novel | NO  | NO  | NO  | NO  |
| SPAC22H10.04  | SPBC119.08    | 0.5888303 | Novel | YES | NO  | NO  | NO  |
| SPCC1259.13   | SPAC821.08c   | 0.5887454 | Novel | NO  | YES | NO  | YES |
| SPBC11B10.09  | SPBC776.18c   | 0.588701  | Novel | NO  | YES | NO  | YES |
| SPCC5E4.03c   | SPBC119.02    | 0.5883608 | Novel | NO  | NO  | NO  | NO  |
| SPAC17A2.13c  | SPBC16H5.10c  | 0.5882281 | Novel | NO  | NO  | NO  | NO  |
| SPAC110.03    | SPCC1682.16   | 0.5878409 | Novel | NO  | NO  | NO  | NO  |
| SPBC9B6.10    | SPBC19F8.07   | 0.5875457 | Novel | YES | NO  | NO  | YES |
| SPAC9G1.09    | SPBC19F8.07   | 0.5873754 | Novel | NO  | YES | YES | NO  |
| SPCC417.06c   | SPAC1F7.04    | 0.5870027 | Novel | NO  | NO  | NO  | NO  |
| SPAC23C4.12   | SPBC1347.06c  | 0.5862853 | Novel | NO  | YES | YES | NO  |
| SPBC1685.15c  | SPAC23C4.08   | 0.5862394 | Novel | NO  | YES | NO  | NO  |
| SPCC1259.15c  | SPBC582.03    | 0.5861248 | Novel | NO  | NO  | YES | YES |
| SPBC3F6.03    | SPAC23C4.08   | 0.5860747 | Novel | NO  | NO  | NO  | NO  |
| SPCC1259.15c  | SPCC1919.15   | 0.5860251 | Novel | NO  | YES | NO  | NO  |
| SPCC970.10c   | SPCC1259.15c  | 0.5859294 | Novel | NO  | YES | NO  | NO  |
| SPCC24B10.07  | SPAC23C11.16  | 0.5858215 | Novel | NO  | YES | YES | NO  |
| SPCC1259.15c  | SPBC1734.06   | 0.585745  | Novel | NO  | YES | YES | NO  |

|               |               |           |       |     |     |     |     |
|---------------|---------------|-----------|-------|-----|-----|-----|-----|
| SPBC2F12.13   | SPAC23C4.08   | 0.5857042 | Novel | NO  | YES | NO  | NO  |
| SPAC16A10.04  | SPAP8A3.04c   | 0.5852928 | Novel | NO  | NO  | NO  | NO  |
| SPAC19G12.01c | SPAC144.13c   | 0.5851157 | Novel | NO  | NO  | NO  | YES |
| SPAC637.07    | SPAC23C4.08   | 0.5850404 | Novel | NO  | YES | NO  | NO  |
| SPBC23G7.12c  | SPAC23C4.08   | 0.5847894 | Novel | NO  | NO  | NO  | NO  |
| SPAC110.03    | SPAC14C4.09   | 0.5839863 | Novel | NO  | NO  | NO  | NO  |
| SPBC23G7.12c  | SPBP19A11.03c | 0.5836469 | Novel | YES | YES | YES | NO  |
| SPAC824.04    | SPBC18H10.06c | 0.5833548 | Novel | NO  | NO  | NO  | NO  |
| SPBP4H10.04   | SPAC1B3.11c   | 0.5832868 | Novel | NO  | NO  | NO  | NO  |
| SPAC16A10.04  | SPAC16E8.09   | 0.5825475 | Novel | NO  | NO  | YES | NO  |
| SPAC22H10.07  | SPAC23C4.08   | 0.582361  | Novel | NO  | YES | YES | NO  |
| SPBC23G7.12c  | SPAC637.10c   | 0.5820894 | Novel | YES | NO  | YES | NO  |
| SPBC21B10.04c | SPAC23C4.08   | 0.5820023 | Novel | NO  | NO  | YES | NO  |
| SPBC21C3.18   | SPCC18B5.11c  | 0.5818981 | Novel | NO  | YES | YES | NO  |
| SPAC4F8.07c   | SPAC23C4.08   | 0.581681  | Novel | NO  | NO  | NO  | NO  |
| SPCC962.04    | SPAC23C4.08   | 0.5816692 | Novel | NO  | NO  | NO  | NO  |
| SPCC417.06c   | SPAC23C4.08   | 0.5815783 | Novel | NO  | NO  | NO  | NO  |
| SPAC1805.05   | SPAC23C4.12   | 0.5811024 | Novel | NO  | YES | YES | NO  |
| SPBC1347.06c  | SPAC8F11.07c  | 0.5809323 | Novel | NO  | NO  | NO  | NO  |
| SPAC110.03    | SPAC16A10.04  | 0.580862  | Novel | NO  | YES | YES | NO  |
| SPBC405.07    | SPAC23C4.08   | 0.5806452 | Novel | NO  | NO  | NO  | NO  |
| SPBP4H10.04   | SPAC6F6.15    | 0.5805607 | Novel | NO  | NO  | NO  | NO  |
| SPBC119.02    | SPAC23C4.08   | 0.5803932 | Novel | NO  | NO  | NO  | NO  |
| SPBC3H7.15    | SPBC1347.06c  | 0.5802615 | Novel | NO  | YES | YES | NO  |
| SPAC23C4.08   | SPCC970.05    | 0.5802419 | Novel | NO  | NO  | NO  | NO  |
| SPAC6F6.07c   | SPAC23C4.08   | 0.5801564 | Novel | NO  | NO  | NO  | NO  |
| SPAC26A3.07c  | SPAC23C4.08   | 0.5799514 | Novel | NO  | NO  | NO  | NO  |
| SPBC17G9.10   | SPAC23C4.08   | 0.5799514 | Novel | NO  | NO  | NO  | NO  |
| SPBC119.08    | SPCC1322.08   | 0.5794465 | Novel | YES | YES | YES | NO  |
| SPCC417.06c   | SPAC20H4.11c  | 0.5793343 | Novel | NO  | NO  | NO  | NO  |
| SPBC32H8.10   | SPBC19F8.07   | 0.5791029 | Novel | NO  | YES | YES | YES |
| SPBC23G7.12c  | SPBC646.09c   | 0.5789895 | Novel | NO  | NO  | NO  | NO  |
| SPAC24B11.06c | SPAC1F7.04    | 0.5787548 | Novel | NO  | YES | NO  | NO  |
| SPBC21C3.18   | SPBC776.12c   | 0.5784986 | Novel | NO  | YES | YES | NO  |
| SPBC1685.10   | SPAC23C4.08   | 0.578461  | Novel | NO  | NO  | NO  | NO  |
| SPAC1805.15c  | SPAC977.10    | 0.5784156 | Novel | NO  | NO  | NO  | YES |
| SPAC1420.03   | SPBC23G7.12c  | 0.5783645 | Novel | YES | NO  | YES | NO  |
| SPBC23G7.12c  | SPAPB8E5.02c  | 0.5783645 | Novel | NO  | NO  | YES | NO  |
| SPCC16C4.11   | SPCC1840.02c  | 0.5781437 | Novel | NO  | NO  | NO  | NO  |
| SPBC32F12.04  | SPCC895.07    | 0.5781075 | Novel | YES | NO  | YES | YES |
| SPAC637.07    | SPAC16A10.04  | 0.5777531 | Novel | NO  | NO  | NO  | NO  |
| SPAC23A1.06c  | SPBC119.08    | 0.577647  | Novel | YES | YES | YES | NO  |
| SPBC1685.15c  | SPAC17H9.09c  | 0.577536  | Novel | NO  | NO  | NO  | YES |
| SPAC17D4.03c  | SPAC4C5.02c   | 0.5773932 | Novel | NO  | NO  | NO  | YES |
| SPAC4C5.02c   | SPAC1B3.11c   | 0.5772553 | Novel | NO  | YES | YES | NO  |
| SPCC1259.13   | SPBC21C3.18   | 0.5772511 | Novel | YES | YES | YES | NO  |
| SPAC16A10.04  | SPBC2F12.13   | 0.5772318 | Novel | NO  | NO  | NO  | NO  |

|               |               |           |       |     |     |     |     |
|---------------|---------------|-----------|-------|-----|-----|-----|-----|
| SPCC1259.13   | SPBC19F8.07   | 0.5770109 | Novel | YES | YES | YES | YES |
| SPAC17D4.03c  | SPAC1B3.11c   | 0.5768225 | Novel | NO  | NO  | NO  | NO  |
| SPAC4D7.05    | SPBC23G7.12c  | 0.5768103 | Novel | NO  | NO  | NO  | NO  |
| SPAC22H10.12c | SPAC1B3.11c   | 0.5765011 | Novel | NO  | NO  | YES | NO  |
| SPCC18B5.03   | SPAC2G11.11c  | 0.5762704 | Novel | NO  | YES | NO  | NO  |
| SPAC24H6.05   | SPBC21C3.18   | 0.5757873 | Novel | YES | NO  | NO  | NO  |
| SPBC3H7.15    | SPAC1805.05   | 0.5754473 | Novel | NO  | YES | YES | NO  |
| SPAC4A8.05c   | SPAC29A4.05   | 0.5752069 | Novel | NO  | YES | NO  | YES |
| SPAC16A10.04  | SPBC23G7.12c  | 0.5751953 | Novel | NO  | NO  | NO  | NO  |
| SPBC582.03    | SPAC2G11.11c  | 0.5744708 | Novel | NO  | NO  | NO  | NO  |
| SPBC119.02    | SPBC15D4.14   | 0.5744382 | Novel | NO  | NO  | NO  | NO  |
| SPAC664.11    | SPBC646.09c   | 0.5742675 | Novel | NO  | NO  | NO  | NO  |
| SPAC16A10.04  | SPCC417.06c   | 0.5742454 | Novel | NO  | NO  | NO  | NO  |
| SPBC11B10.09  | SPBC18H10.15  | 0.574059  | Novel | NO  | YES | YES | NO  |
| SPBC23G7.12c  | SPBC409.06    | 0.5739176 | Novel | NO  | NO  | YES | NO  |
| SPAC17D4.03c  | SPAC6F6.15    | 0.5737421 | Novel | NO  | NO  | NO  | NO  |
| SPAPB18E9.04c | SPAC14C4.09   | 0.5737311 | Novel | YES | NO  | NO  | NO  |
| SPBC12D12.04c | SPBC776.02c   | 0.5732685 | Novel | NO  | NO  | NO  | YES |
| SPBC23G7.12c  | SPAC6G9.08    | 0.5731783 | Novel | NO  | NO  | YES | NO  |
| SPCC16C4.11   | SPBC14F5.08   | 0.5730843 | Novel | NO  | NO  | NO  | NO  |
| SPCC16C4.11   | SPBP4H10.04   | 0.573061  | Novel | NO  | NO  | YES | NO  |
| SPAC17G6.16c  | SPCC1739.12   | 0.5722046 | Novel | NO  | NO  | NO  | NO  |
| SPAC824.04    | SPCC1739.12   | 0.5721453 | Novel | NO  | NO  | NO  | NO  |
| SPCC1739.12   | SPAC4A8.12c   | 0.5718962 | Novel | NO  | NO  | NO  | NO  |
| SPBC119.02    | SPAC6F12.15c  | 0.5714149 | Novel | NO  | NO  | YES | NO  |
| SPBC21C3.18   | SPBC4.04c     | 0.5711497 | Novel | YES | YES | NO  | NO  |
| SPBC1289.13c  | SPAC5H10.13c  | 0.5707144 | Novel | YES | YES | YES | NO  |
| SPCC1739.12   | SPBC25B2.05   | 0.5705431 | Novel | NO  | NO  | NO  | NO  |
| SPCC16C4.11   | SPAC2C4.14c   | 0.5705241 | Novel | NO  | YES | YES | NO  |
| SPAC2G11.11c  | SPAC23C11.11  | 0.5700274 | Novel | YES | YES | NO  | NO  |
| SPAC1805.05   | SPAC8F11.07c  | 0.5695465 | Novel | NO  | NO  | NO  | NO  |
| SPBC409.07c   | SPBC11B10.09  | 0.5692968 | Novel | NO  | YES | YES | YES |
| SPAC17C9.13c  | SPCC1739.12   | 0.5688941 | Novel | NO  | NO  | NO  | NO  |
| SPAC24B11.06c | SPAC11E3.09   | 0.568854  | Novel | YES | NO  | NO  | YES |
| SPBC12D12.07c | SPBC17A3.07   | 0.5688478 | Novel | YES | NO  | NO  | NO  |
| SPCC1739.12   | SPAC6F12.15c  | 0.5677957 | Novel | NO  | YES | NO  | NO  |
| SPBC32F12.06  | SPBC18H10.15  | 0.5677234 | Novel | NO  | NO  | NO  | NO  |
| SPAC24H6.05   | SPBC18H10.15  | 0.5675704 | Novel | NO  | NO  | NO  | NO  |
| SPBC21C3.18   | SPBC25D12.03c | 0.567246  | Novel | NO  | YES | NO  | NO  |
| SPCC1739.12   | SPCC622.09    | 0.5668911 | Novel | NO  | NO  | NO  | YES |
| SPBC21C3.18   | SPBC216.05    | 0.5668151 | Novel | NO  | YES | NO  | NO  |
| SPBC21C3.18   | SPAPB1E7.02c  | 0.5666044 | Novel | NO  | NO  | NO  | NO  |
| SPBC216.06c   | SPBC21C3.18   | 0.5661944 | Novel | NO  | NO  | NO  | NO  |
| SPAC17D4.02   | SPBC21C3.18   | 0.5661846 | Novel | NO  | NO  | NO  | NO  |
| SPBC21C3.18   | SPBC29A10.15  | 0.566155  | Novel | NO  | YES | NO  | NO  |
| SPBC21C3.18   | SPAC23C4.18c  | 0.5659933 | Novel | NO  | NO  | NO  | NO  |
| SPAC1952.05   | SPBC15D4.14   | 0.5657977 | Novel | NO  | NO  | NO  | NO  |



|               |               |           |       |     |     |     |     |
|---------------|---------------|-----------|-------|-----|-----|-----|-----|
| SPAC16A10.04  | SPBC1685.15c  | 0.565125  | Novel | NO  | NO  | NO  | NO  |
| SPBP35G2.05c  | SPAC8F11.07c  | 0.564839  | Novel | NO  | NO  | NO  | NO  |
| SPBC21C3.18   | SPAC2G11.12   | 0.5645121 | Novel | NO  | YES | NO  | NO  |
| SPBP4H10.04   | SPBC1703.10   | 0.5643233 | Novel | NO  | NO  | NO  | NO  |
| SPCC16C4.11   | SPBC26H8.05c  | 0.5641744 | Novel | NO  | NO  | YES | NO  |
| SPCC5E4.03c   | SPAC11E3.04c  | 0.5639415 | Novel | NO  | YES | NO  | NO  |
| SPAC144.13c   | SPAC644.06c   | 0.5638533 | Novel | NO  | NO  | YES | YES |
| SPAC110.03    | SPBC16C6.07c  | 0.5633286 | Novel | NO  | NO  | NO  | NO  |
| SPAC24H6.05   | SPACUNK12.02c | 0.5632582 | Novel | NO  | NO  | YES | NO  |
| SPAC1F5.09c   | SPAC2C4.14c   | 0.563122  | Novel | NO  | YES | YES | NO  |
| SPAC24B11.06c | SPAC20H4.11c  | 0.5630671 | Novel | NO  | NO  | NO  | NO  |
| SPAC1A6.03c   | SPAC23H3.13c  | 0.5626302 | Novel | NO  | NO  | NO  | NO  |
| SPAC57A10.02  | SPAC144.13c   | 0.562625  | Novel | NO  | NO  | NO  | YES |
| SPAC2G11.11c  | SPAC644.12    | 0.5620712 | Novel | NO  | NO  | NO  | NO  |
| SPBC21C3.18   | SPBC211.04c   | 0.5613137 | Novel | NO  | YES | NO  | NO  |
| SPAC2G11.11c  | SPAC8E11.02c  | 0.5612806 | Novel | NO  | NO  | NO  | NO  |
| SPAC3G9.07c   | SPBC14F5.12c  | 0.561217  | Novel | YES | NO  | YES | NO  |
| SPCC16C4.11   | SPBC409.07c   | 0.5608118 | Novel | NO  | YES | YES | NO  |
| SPBC21C3.18   | SPCC16A11.17  | 0.5606284 | Novel | NO  | YES | NO  | NO  |
| SPAC17D4.03c  | SPBC1703.10   | 0.560583  | Novel | YES | NO  | NO  | NO  |
| SPAC22E12.14c | SPAC23C11.16  | 0.5605292 | Novel | NO  | YES | YES | NO  |
| SPAC821.12    | SPBC106.10    | 0.5594456 | Novel | NO  | YES | YES | NO  |
| SPBC409.04c   | SPCC31H12.05c | 0.5591309 | Novel | NO  | NO  | NO  | NO  |
| SPAC23E2.01   | SPAC630.14c   | 0.5590958 | Novel | NO  | YES | NO  | YES |
| SPCC297.03    | SPBC119.08    | 0.5590575 | Novel | YES | YES | YES | NO  |
| SPCC18B5.03   | SPBC119.08    | 0.5589836 | Novel | NO  | YES | NO  | NO  |
| SPAC23A1.06c  | SPAC8E11.02c  | 0.558689  | Novel | YES | YES | NO  | YES |
| SPBC16C6.07c  | SPAC3G6.02    | 0.5586102 | Novel | NO  | NO  | NO  | NO  |
| SPAC24H6.05   | SPAC9G1.09    | 0.5585727 | Novel | NO  | YES | NO  | NO  |
| SPBC119.08    | SPBC1604.14c  | 0.5585068 | Novel | YES | YES | YES | YES |
| SPAC16A10.04  | SPBC3F6.03    | 0.5582221 | Novel | NO  | NO  | NO  | NO  |
| SPAC57A7.08   | SPBP4H10.04   | 0.5574243 | Novel | NO  | YES | YES | YES |
| SPAC16.01     | SPCC417.06c   | 0.5572348 | Novel | NO  | NO  | NO  | NO  |
| SPBC839.07    | SPBC21C3.18   | 0.5571634 | Novel | NO  | NO  | NO  | NO  |
| SPBC21C3.18   | SPBC1347.10   | 0.5571556 | Novel | YES | NO  | NO  | NO  |
| SPAC24B11.06c | SPBC18H10.15  | 0.557152  | Novel | NO  | YES | YES | NO  |
| SPBC3F6.05    | SPAC1006.06   | 0.5571355 | Novel | NO  | NO  | YES | YES |
| SPAC24H6.06   | SPBC21C3.18   | 0.5571123 | Novel | NO  | NO  | NO  | NO  |
| SPBC21C3.18   | SPBC16A3.11   | 0.5571012 | Novel | NO  | NO  | NO  | NO  |
| SPAC19G12.14  | SPAC1006.06   | 0.5570269 | Novel | NO  | NO  | NO  | NO  |
| SPAC16A10.04  | SPAC24H6.09   | 0.5569986 | Novel | NO  | NO  | YES | NO  |
| SPBC21C3.18   | SPAC664.01c   | 0.5569185 | Novel | NO  | NO  | NO  | NO  |
| SPCC1753.02c  | SPAC1A6.03c   | 0.5567678 | Novel | NO  | NO  | NO  | NO  |
| SPBC21C3.18   | SPBC725.13c   | 0.5567668 | Novel | NO  | NO  | NO  | NO  |
| SPBC21C3.18   | SPAC17G8.13c  | 0.5567639 | Novel | NO  | NO  | NO  | NO  |
| SPBC21C3.18   | SPAC8F11.07c  | 0.5565479 | Novel | NO  | NO  | NO  | NO  |
| SPBC21C3.18   | SPCC338.17c   | 0.556478  | Novel | NO  | NO  | NO  | NO  |

|               |               |           |       |     |     |     |     |
|---------------|---------------|-----------|-------|-----|-----|-----|-----|
| SPAC11E3.04c  | SPAC20H4.11c  | 0.5560409 | Novel | NO  | NO  | NO  | NO  |
| SPAC19E9.03   | SPBC19F8.07   | 0.5560094 | Novel | NO  | NO  | NO  | YES |
| SPBC19G7.05c  | SPCC417.06c   | 0.5555807 | Novel | NO  | NO  | NO  | NO  |
| SPAC4C5.04    | SPBC1347.06c  | 0.5554986 | Novel | NO  | NO  | NO  | NO  |
| SPCC417.06c   | SPBC244.01c   | 0.5554776 | Novel | YES | NO  | NO  | NO  |
| SPCC417.06c   | SPAC1782.09c  | 0.5554038 | Novel | YES | NO  | NO  | NO  |
| SPCC417.06c   | SPAC6F6.08c   | 0.5553542 | Novel | YES | NO  | NO  | NO  |
| SPAC23H3.04   | SPAC664.07c   | 0.5550992 | Novel | NO  | NO  | NO  | NO  |
| SPAC19E9.02   | SPBC19F8.07   | 0.5547698 | Novel | NO  | YES | YES | YES |
| SPAC57A10.02  | SPBC19F8.07   | 0.5547519 | Novel | NO  | YES | YES | YES |
| SPAC24H6.05   | SPBC119.08    | 0.5545626 | Novel | YES | YES | NO  | NO  |
| SPAC17C9.13c  | SPAC22H10.04  | 0.5543267 | Novel | NO  | NO  | NO  | NO  |
| SPCC417.06c   | SPBP4H10.04   | 0.5542201 | Novel | NO  | NO  | YES | NO  |
| SPAC644.06c   | SPBC19F8.07   | 0.5542054 | Novel | YES | YES | YES | YES |
| SPBC13G1.11   | SPAC6F6.15    | 0.5537804 | Novel | NO  | NO  | NO  | NO  |
| SPAC664.11    | SPAC3C7.11c   | 0.5532926 | Novel | NO  | YES | NO  | NO  |
| SPBC16H5.11c  | SPBC19F8.07   | 0.553206  | Novel | NO  | NO  | NO  | YES |
| SPAC2G11.12   | SPBC11B10.10c | 0.5525713 | Novel | NO  | YES | NO  | NO  |
| SPCC18B5.11c  | SPBC11B10.10c | 0.5524824 | Novel | NO  | NO  | NO  | NO  |
| SPBC12D12.01  | SPAC3A12.14   | 0.5524713 | Novel | YES | YES | YES | NO  |
| SPAC110.03    | SPAC2C4.14c   | 0.5522697 | Novel | YES | NO  | NO  | NO  |
| SPCC417.06c   | SPAC664.07c   | 0.5521514 | Novel | NO  | NO  | NO  | NO  |
| SPAC22H10.04  | SPAC4A8.12c   | 0.5510849 | Novel | YES | NO  | NO  | NO  |
| SPAC24B11.11c | SPCC417.06c   | 0.551071  | Novel | YES | YES | YES | NO  |
| SPCC645.05c   | SPCC417.06c   | 0.5510417 | Novel | NO  | YES | NO  | NO  |
| SPAC6F12.15c  | SPAC11E3.04c  | 0.5508513 | Novel | NO  | YES | YES | NO  |
| SPAC16A10.04  | SPAC22H10.07  | 0.5508157 | Novel | NO  | NO  | YES | NO  |
| SPBC11B10.09  | SPCC18B5.11c  | 0.5507023 | Novel | NO  | YES | YES | YES |
| SPCC417.06c   | SPAC9G1.09    | 0.55064   | Novel | YES | YES | YES | NO  |
| SPAC16A10.04  | SPAC7D4.07c   | 0.5505305 | Novel | NO  | NO  | NO  | NO  |
| SPAC11E3.04c  | SPBC15D4.14   | 0.5503129 | Novel | NO  | NO  | NO  | NO  |
| SPAC16A10.04  | SPBC21B10.04c | 0.5502322 | Novel | NO  | NO  | YES | NO  |
| SPCC970.04c   | SPBP4H10.04   | 0.5501581 | Novel | YES | NO  | YES | YES |
| SPAC16A10.04  | SPCC962.04    | 0.5501208 | Novel | NO  | NO  | NO  | NO  |
| SPAC17G6.16c  | SPAC22H10.04  | 0.5501154 | Novel | NO  | NO  | NO  | NO  |
| SPAC16A10.04  | SPAC6F6.07c   | 0.5500659 | Novel | NO  | NO  | NO  | NO  |
| SPAC16A10.04  | SPAC4F8.07c   | 0.5500598 | Novel | NO  | NO  | NO  | NO  |
| SPBC21.06c    | SPCC417.06c   | 0.5500313 | Novel | YES | YES | YES | NO  |
| SPCC417.06c   | SPBC1718.07c  | 0.5500032 | Novel | NO  | NO  | NO  | NO  |
| SPAC24B11.11c | SPBC776.02c   | 0.5499492 | Novel | NO  | NO  | NO  | YES |
| SPAC22H10.04  | SPAC824.04    | 0.5499051 | Novel | NO  | NO  | NO  | NO  |
| SPAC23H3.04   | SPAC644.12    | 0.5497229 | Novel | NO  | NO  | NO  | NO  |
| SPBC11B10.09  | SPBP4H10.04   | 0.5496616 | Novel | NO  | NO  | NO  | YES |
| SPBC12D12.08c | SPBC337.08c   | 0.5494701 | Novel | NO  | YES | NO  | NO  |
| SPCC417.06c   | SPCC1739.11c  | 0.5494547 | Novel | YES | NO  | NO  | NO  |
| SPAC23H3.04   | SPBC6B1.07    | 0.5493513 | Novel | NO  | NO  | NO  | NO  |
| SPAC821.09    | SPCC417.06c   | 0.5491964 | Novel | NO  | NO  | NO  | NO  |

|               |               |           |       |     |     |     |     |
|---------------|---------------|-----------|-------|-----|-----|-----|-----|
| SPCC417.06c   | SPAC6F12.12   | 0.5491654 | Novel | NO  | NO  | NO  | NO  |
| SPCC417.06c   | SPCC188.02    | 0.5490853 | Novel | NO  | NO  | NO  | NO  |
| SPCC16C4.07   | SPCC417.06c   | 0.5490805 | Novel | NO  | NO  | NO  | NO  |
| SPCC417.06c   | SPAPYUG7.03c  | 0.5490764 | Novel | NO  | NO  | NO  | NO  |
| SPCC417.06c   | SPBC4C3.12    | 0.549076  | Novel | NO  | NO  | NO  | NO  |
| SPCC417.06c   | SPBC16A3.01   | 0.5490716 | Novel | NO  | NO  | NO  | NO  |
| SPBC428.13c   | SPCC417.06c   | 0.5490373 | Novel | YES | NO  | NO  | NO  |
| SPCC417.06c   | SPAC9G1.11c   | 0.5490122 | Novel | NO  | NO  | NO  | NO  |
| SPCC417.06c   | SPCC970.09    | 0.5490093 | Novel | NO  | NO  | NO  | NO  |
| SPCC417.06c   | SPAC6G10.12c  | 0.5489983 | Novel | NO  | NO  | NO  | NO  |
| SPCC417.06c   | SPAC1006.08   | 0.5489603 | Novel | NO  | NO  | NO  | NO  |
| SPCC417.06c   | SPAC14C4.09   | 0.5488175 | Novel | NO  | NO  | NO  | NO  |
| SPCC417.06c   | SPBC24C6.07   | 0.5488052 | Novel | YES | NO  | NO  | NO  |
| SPAC31G5.09c  | SPBC19F8.07   | 0.5487951 | Novel | NO  | YES | YES | NO  |
| SPBC216.07c   | SPAC821.08c   | 0.5487305 | Novel | NO  | YES | NO  | YES |
| SPAC16A10.04  | SPBC17G9.10   | 0.5487027 | Novel | NO  | NO  | NO  | NO  |
| SPAC16A10.04  | SPAC26A3.07c  | 0.5487027 | Novel | NO  | NO  | NO  | NO  |
| SPAC16A10.04  | SPBC119.02    | 0.5486583 | Novel | NO  | NO  | NO  | YES |
| SPAC24B11.06c | SPBC1604.14c  | 0.5486319 | Novel | NO  | YES | YES | YES |
| SPBC543.07    | SPBC1D7.05    | 0.5486056 | Novel | YES | YES | YES | NO  |
| SPCC970.04c   | SPCC417.06c   | 0.5485987 | Novel | NO  | NO  | YES | NO  |
| SPBC32F12.09  | SPCC417.06c   | 0.5485802 | Novel | NO  | NO  | YES | NO  |
| SPAC16A10.04  | SPCC970.05    | 0.5485054 | Novel | NO  | NO  | NO  | NO  |
| SPAC16A10.04  | SPBC405.07    | 0.5485054 | Novel | NO  | NO  | NO  | NO  |
| SPAC823.15    | SPAC3F10.02c  | 0.5484059 | Novel | NO  | NO  | NO  | NO  |
| SPAC16A10.04  | SPBC1685.10   | 0.547894  | Novel | NO  | NO  | NO  | NO  |
| SPAC31G5.09c  | SPAC9G1.09    | 0.5477889 | Novel | NO  | YES | YES | NO  |
| SPBC1198.12   | SPAC644.06c   | 0.547424  | Novel | NO  | NO  | NO  | NO  |
| SPAC22H10.04  | SPBC25B2.05   | 0.5472358 | Novel | NO  | NO  | NO  | NO  |
| SPCC970.04c   | SPAC222.10c   | 0.5471139 | Novel | NO  | YES | NO  | YES |
| SPAC57A7.08   | SPBC776.02c   | 0.5470845 | Novel | YES | YES | YES | NO  |
| SPAC22H10.04  | SPAC6F12.15c  | 0.5470348 | Novel | NO  | NO  | NO  | NO  |
| SPCC970.04c   | SPCC1739.11c  | 0.5470305 | Novel | YES | YES | NO  | YES |
| SPCC970.04c   | SPCC188.02    | 0.5469607 | Novel | YES | NO  | NO  | YES |
| SPCC970.04c   | SPAC6G10.12c  | 0.5466667 | Novel | YES | NO  | NO  | YES |
| SPCC16C4.07   | SPCC970.04c   | 0.5466503 | Novel | YES | NO  | NO  | YES |
| SPCC970.04c   | SPAC1782.09c  | 0.5465723 | Novel | YES | YES | NO  | YES |
| SPCC970.04c   | SPAC6F6.08c   | 0.546381  | Novel | NO  | YES | NO  | YES |
| SPCC970.04c   | SPAC1565.06c  | 0.5462942 | Novel | NO  | YES | NO  | YES |
| SPCC970.04c   | SPAC3A12.14   | 0.5462935 | Novel | NO  | YES | NO  | NO  |
| SPAC31G5.09c  | SPAC110.03    | 0.5462673 | Novel | NO  | NO  | NO  | NO  |
| SPBC342.05    | SPBC11B10.10c | 0.5461306 | Novel | NO  | NO  | NO  | NO  |
| SPBC11B10.09  | SPAC6F6.08c   | 0.5460689 | Novel | NO  | YES | NO  | YES |
| SPAC24B11.11c | SPAC823.15    | 0.5459594 | Novel | NO  | NO  | NO  | YES |
| SPAC644.14c   | SPBC11B10.10c | 0.5459386 | Novel | NO  | NO  | NO  | NO  |
| SPCC622.08c   | SPBC11B10.10c | 0.545878  | Novel | YES | YES | YES | NO  |
| SPAC19G12.06c | SPBC11B10.10c | 0.5458764 | Novel | YES | YES | YES | NO  |

|               |               |           |       |     |     |     |     |
|---------------|---------------|-----------|-------|-----|-----|-----|-----|
| SPAC30D11.10  | SPBC11B10.10c | 0.545848  | Novel | NO  | NO  | NO  | NO  |
| SPBC12D12.04c | SPCC31H12.05c | 0.5458355 | Novel | NO  | NO  | NO  | NO  |
| SPBC119.08    | SPAC2C4.14c   | 0.5455585 | Novel | YES | YES | YES | NO  |
| SPBC19F8.07   | SPAC821.08c   | 0.5455386 | Novel | NO  | NO  | NO  | YES |
| SPAC57A7.08   | SPCC31H12.05c | 0.5454062 | Novel | NO  | YES | NO  | NO  |
| SPBC16A3.15c  | SPBC800.05c   | 0.5449328 | Novel | YES | YES | YES | YES |
| SPAC1F5.09c   | SPBC19F8.07   | 0.5446536 | Novel | NO  | YES | YES | NO  |
| SPBC18H10.15  | SPBC19F8.07   | 0.5445877 | Novel | NO  | YES | YES | NO  |
| SPAC57A10.02  | SPBC1198.12   | 0.5440292 | Novel | NO  | YES | NO  | NO  |
| SPCC16C4.11   | SPCC18B5.11c  | 0.5440154 | Novel | NO  | YES | YES | NO  |
| SPCC576.15c   | SPAC1B9.02c   | 0.5439355 | Novel | NO  | YES | YES | NO  |
| SPAC22H10.04  | SPCC622.09    | 0.5436786 | Novel | NO  | NO  | NO  | NO  |
| SPAC1F7.04    | SPAC2C4.14c   | 0.5429792 | Novel | NO  | NO  | NO  | NO  |
| SPAC23C11.16  | SPBC19F8.07   | 0.5428931 | Novel | YES | YES | YES | YES |
| SPAC9G1.09    | SPBC18H10.15  | 0.542876  | Novel | NO  | YES | YES | NO  |
| SPAC1F7.04    | SPAC1250.03   | 0.5427917 | Novel | NO  | NO  | NO  | NO  |
| SPAC24H6.05   | SPCC320.13c   | 0.5424559 | Novel | NO  | YES | NO  | YES |
| SPAC20H4.11c  | SPAC18B11.07c | 0.5423154 | Novel | NO  | NO  | NO  | NO  |
| SPAC3A12.14   | SPBC32H8.12c  | 0.5418346 | Novel | NO  | NO  | NO  | NO  |
| SPCC16C4.11   | SPAC589.02c   | 0.5417769 | Novel | NO  | NO  | NO  | NO  |
| SPAC1805.05   | SPAC4C5.04    | 0.5414931 | Novel | NO  | NO  | NO  | NO  |
| SPCC1259.13   | SPBC11B10.10c | 0.5409908 | Novel | NO  | NO  | NO  | NO  |
| SPBC776.02c   | SPBC19F8.07   | 0.5407694 | Novel | YES | NO  | NO  | YES |
| SPAC110.03    | SPCC417.06c   | 0.5405341 | Novel | NO  | NO  | NO  | NO  |
| SPBC582.03    | SPCC18B5.03   | 0.5403772 | Novel | NO  | YES | YES | YES |
| SPBC11B10.09  | SPAC2F3.15    | 0.5402765 | Novel | NO  | YES | NO  | YES |
| SPAC694.06c   | SPBC11B10.10c | 0.5398092 | Novel | NO  | YES | NO  | NO  |
| SPBC649.05    | SPBC19F8.07   | 0.5397454 | Novel | NO  | NO  | NO  | YES |
| SPCC1183.05c  | SPBC11B10.10c | 0.5396629 | Novel | NO  | NO  | NO  | NO  |
| SPAC22E12.07  | SPBC11B10.10c | 0.539653  | Novel | NO  | NO  | NO  | NO  |
| SPBC119.08    | SPAC29A4.16   | 0.5395554 | Novel | NO  | YES | YES | NO  |
| SPAC57A7.08   | SPAC17C9.13c  | 0.5394929 | Novel | NO  | NO  | NO  | NO  |
| SPCC126.02c   | SPBC11B10.10c | 0.5394289 | Novel | NO  | NO  | NO  | NO  |
| SPAC13C5.07   | SPBC11B10.10c | 0.539411  | Novel | NO  | NO  | NO  | NO  |
| SPBC19C7.03   | SPCC24B10.07  | 0.5390947 | Novel | NO  | YES | NO  | NO  |
| SPAC18G6.03   | SPBC13G1.11   | 0.5390666 | Novel | NO  | NO  | YES | YES |
| SPAC144.13c   | SPBC19F8.07   | 0.539059  | Novel | NO  | NO  | NO  | YES |
| SPAC24B11.06c | SPAC9G1.09    | 0.5381604 | Novel | NO  | YES | YES | NO  |
| SPAC23H3.04   | SPAC20G4.04c  | 0.5372912 | Novel | NO  | NO  | NO  | NO  |
| SPAC31G5.09c  | SPAC24B11.06c | 0.5366898 | Novel | NO  | YES | YES | YES |
| SPAC11E3.09   | SPBC19F8.07   | 0.5365261 | Novel | YES | NO  | NO  | YES |
| SPAC23H3.04   | SPCC18B5.11c  | 0.5361153 | Novel | NO  | NO  | NO  | NO  |
| SPAC23H3.04   | SPAC22A12.07c | 0.5360258 | Novel | YES | NO  | NO  | NO  |
| SPBC26H8.05c  | SPBC119.08    | 0.5357463 | Novel | NO  | NO  | NO  | NO  |
| SPBC11B10.09  | SPCC320.13c   | 0.5347401 | Novel | NO  | YES | NO  | YES |
| SPBC543.07    | SPBC11B10.09  | 0.5343713 | Novel | NO  | YES | YES | NO  |
| SPCC364.02c   | SPAC29A4.18   | 0.5343264 | Novel | NO  | NO  | NO  | NO  |

|               |               |           |       |     |     |     |     |
|---------------|---------------|-----------|-------|-----|-----|-----|-----|
| SPBC14C8.06   | SPBC1347.12   | 0.5340627 | Novel | NO  | NO  | NO  | NO  |
| SPBC1685.15c  | SPBC1604.14c  | 0.5340596 | Novel | NO  | YES | NO  | YES |
| SPAC1D4.13    | SPAC16.01     | 0.5338462 | Novel | NO  | YES | NO  | NO  |
| SPBC336.12c   | SPBC19F8.07   | 0.5337694 | Novel | YES | NO  | NO  | YES |
| SPBC56F2.07c  | SPCC5E4.04    | 0.5331045 | Novel | NO  | NO  | NO  | NO  |
| SPAC57A7.08   | SPAC6F12.15c  | 0.5329847 | Novel | NO  | NO  | NO  | NO  |
| SPBC18H10.15  | SPAC23C11.16  | 0.5328623 | Novel | NO  | YES | YES | NO  |
| SPAC16.01     | SPAC2C4.14c   | 0.5326495 | Novel | YES | NO  | NO  | NO  |
| SPCC16C4.11   | SPBC543.07    | 0.5325495 | Novel | NO  | YES | YES | NO  |
| SPAC20H4.11c  | SPAC2C4.14c   | 0.5324421 | Novel | YES | NO  | NO  | NO  |
| SPBC11B10.09  | SPBC725.16    | 0.532281  | Novel | NO  | NO  | YES | YES |
| SPBC405.04c   | SPAC22H10.12c | 0.5320793 | Novel | NO  | NO  | YES | NO  |
| SPCC16C4.11   | SPAC23C4.19   | 0.531633  | Novel | NO  | YES | NO  | NO  |
| SPAC3G9.07c   | SPBC1105.17   | 0.5315042 | Novel | NO  | NO  | YES | NO  |
| SPBC11B10.09  | SPAC29A4.16   | 0.5314122 | Novel | NO  | YES | YES | YES |
| SPBC24C6.07   | SPBC19F8.07   | 0.5314021 | Novel | NO  | NO  | NO  | NO  |
| SPAC16.01     | SPAC11E3.04c  | 0.5307294 | Novel | NO  | YES | NO  | NO  |
| SPAC24H6.05   | SPBC582.03    | 0.5303443 | Novel | NO  | YES | YES | YES |
| SPCC1259.13   | SPAC23H3.04   | 0.5300604 | Novel | NO  | NO  | NO  | NO  |
| SPAC57A7.08   | SPBC25B2.05   | 0.5297379 | Novel | NO  | NO  | NO  | NO  |
| SPAC57A7.08   | SPBC26H8.10   | 0.5293367 | Novel | NO  | NO  | NO  | NO  |
| SPBC56F2.07c  | SPBC887.04c   | 0.5288951 | Novel | NO  | NO  | NO  | NO  |
| SPAC17G6.16c  | SPAC57A7.08   | 0.5287351 | Novel | NO  | NO  | NO  | NO  |
| SPAC24B11.11c | SPAC23H3.04   | 0.5286882 | Novel | NO  | NO  | NO  | NO  |
| SPAC23H3.04   | SPAC14C4.13   | 0.5286532 | Novel | NO  | NO  | NO  | NO  |
| SPCC23B6.03c  | SPAC23H3.04   | 0.5286329 | Novel | NO  | NO  | NO  | NO  |
| SPAC23H3.04   | SPBC216.05    | 0.5285915 | Novel | NO  | NO  | NO  | NO  |
| SPAC23H3.04   | SPAC13C5.07   | 0.5285904 | Novel | NO  | NO  | NO  | NO  |
| SPAC23H3.04   | SPAC16A10.07c | 0.5285065 | Novel | NO  | NO  | NO  | NO  |
| SPAC24B11.06c | SPCC1739.12   | 0.5284594 | Novel | NO  | YES | NO  | NO  |
| SPAC23H3.04   | SPAC9G1.09    | 0.5283318 | Novel | NO  | NO  | NO  | NO  |
| SPAC57A7.08   | SPAC4A8.12c   | 0.5281807 | Novel | YES | NO  | NO  | NO  |
| SPAC22F3.09c  | SPBC19F8.07   | 0.5281685 | Novel | YES | NO  | NO  | YES |
| SPAC821.04c   | SPBC19F8.07   | 0.5280225 | Novel | YES | YES | NO  | YES |
| SPBC56F2.07c  | SPAC343.09    | 0.5279744 | Novel | NO  | NO  | NO  | NO  |
| SPCC18B5.03   | SPAC2C4.14c   | 0.527972  | Novel | NO  | YES | NO  | NO  |
| SPBC56F2.07c  | SPAC2C4.15c   | 0.527935  | Novel | NO  | NO  | NO  | NO  |
| SPBC56F2.07c  | SPBC14C8.01c  | 0.5278885 | Novel | NO  | NO  | NO  | NO  |
| SPBC409.04c   | SPBC776.02c   | 0.5278409 | Novel | YES | NO  | NO  | YES |
| SPCC1739.11c  | SPBC19F8.07   | 0.5277439 | Novel | YES | NO  | NO  | YES |
| SPBC336.04    | SPBC19F8.07   | 0.5274637 | Novel | NO  | NO  | NO  | YES |
| SPBC21.06c    | SPAC23H3.04   | 0.5274624 | Novel | NO  | NO  | NO  | NO  |
| SPAC31G5.09c  | SPBC1604.14c  | 0.5271915 | Novel | NO  | YES | YES | NO  |
| SPCC297.03    | SPBC11B10.09  | 0.5271745 | Novel | NO  | YES | YES | YES |
| SPBC29A10.15  | SPBC19F8.07   | 0.5271379 | Novel | NO  | YES | NO  | YES |
| SPAC57A7.08   | SPAC824.04    | 0.5267982 | Novel | NO  | NO  | NO  | NO  |
| SPCC16C4.11   | SPAC644.04    | 0.5265983 | Novel | NO  | YES | NO  | NO  |

|               |              |           |       |     |     |     |     |
|---------------|--------------|-----------|-------|-----|-----|-----|-----|
| SPCC31H12.05c | SPBC19F8.07  | 0.5265698 | Novel | NO  | NO  | NO  | NO  |
| SPAC23H3.04   | SPBC1718.07c | 0.5265259 | Novel | NO  | NO  | NO  | NO  |
| SPAC23H3.04   | SPBP4H10.04  | 0.5264822 | Novel | NO  | NO  | NO  | NO  |
| SPBC119.08    | SPBC29B5.01  | 0.5263585 | Novel | NO  | YES | NO  | NO  |
| SPBC1685.15c  | SPBC28F2.06c | 0.5261438 | Novel | NO  | NO  | NO  | YES |
| SPAC23H3.04   | SPAC1952.07  | 0.526031  | Novel | NO  | NO  | NO  | NO  |
| SPCC645.05c   | SPAC23H3.04  | 0.5258267 | Novel | NO  | NO  | NO  | NO  |
| SPCC16C4.07   | SPAC23H3.04  | 0.525654  | Novel | NO  | NO  | NO  | NO  |
| SPAC23H3.04   | SPCC970.09   | 0.5256468 | Novel | NO  | NO  | NO  | NO  |
| SPAC23H3.04   | SPAC6F12.12  | 0.5256432 | Novel | NO  | NO  | NO  | NO  |
| SPBC32H8.10   | SPBC18H10.15 | 0.5256103 | Novel | NO  | YES | YES | NO  |
| SPAC23H3.04   | SPAC1782.09c | 0.5256094 | Novel | NO  | NO  | NO  | NO  |
| SPAC23H3.04   | SPBC16A3.01  | 0.5255782 | Novel | NO  | NO  | NO  | NO  |
| SPBC19G7.05c  | SPAC23H3.04  | 0.5255739 | Novel | YES | NO  | NO  | NO  |
| SPAC23H3.04   | SPAC6G10.12c | 0.5255706 | Novel | NO  | NO  | NO  | NO  |
| SPAC821.09    | SPAC23H3.04  | 0.5255558 | Novel | NO  | NO  | NO  | NO  |
| SPAC23H3.04   | SPCC1739.11c | 0.5255302 | Novel | NO  | NO  | NO  | NO  |
| SPAC23H3.04   | SPCC188.02   | 0.5254691 | Novel | NO  | NO  | NO  | NO  |
| SPBC36.05c    | SPAC23D3.09  | 0.5254277 | Novel | YES | NO  | YES | NO  |
| SPAC23H3.04   | SPAPYUG7.03c | 0.5253993 | Novel | NO  | NO  | NO  | NO  |
| SPAC23H3.04   | SPAC14C4.09  | 0.5253805 | Novel | NO  | NO  | NO  | NO  |
| SPAC23H3.04   | SPAC1F7.04   | 0.5253731 | Novel | NO  | NO  | NO  | NO  |
| SPAC6B12.15   | SPBC11B10.09 | 0.5253628 | Novel | NO  | YES | NO  | NO  |
| SPBC428.13c   | SPAC23H3.04  | 0.5253263 | Novel | NO  | NO  | NO  | NO  |
| SPAC23H3.04   | SPAC1006.08  | 0.525325  | Novel | NO  | NO  | NO  | NO  |
| SPAC23H3.04   | SPBC244.01c  | 0.5253126 | Novel | NO  | NO  | NO  | NO  |
| SPAC23H3.04   | SPAC9G1.11c  | 0.5252987 | Novel | NO  | NO  | NO  | NO  |
| SPAC23H3.04   | SPBC4C3.12   | 0.5252712 | Novel | NO  | NO  | NO  | NO  |
| SPCC970.04c   | SPAC23H3.04  | 0.5252537 | Novel | NO  | NO  | NO  | NO  |
| SPAC23H3.04   | SPBC24C6.07  | 0.5252246 | Novel | NO  | NO  | NO  | NO  |
| SPAC23H3.04   | SPAC23C4.08  | 0.5251806 | Novel | NO  | NO  | NO  | NO  |
| SPAC23H3.04   | SPAPB1E7.09  | 0.5251617 | Novel | YES | NO  | NO  | NO  |
| SPBC32F12.09  | SPAC23H3.04  | 0.5251468 | Novel | NO  | NO  | NO  | NO  |
| SPAC16A10.04  | SPAC23H3.04  | 0.5251136 | Novel | NO  | NO  | NO  | NO  |
| SPAC23H3.04   | SPAC20H4.11c | 0.5251093 | Novel | YES | NO  | NO  | NO  |
| SPCC970.07c   | SPAC11G7.04  | 0.5251067 | Novel | NO  | NO  | NO  | NO  |
| SPAC1805.12c  | SPCC970.07c  | 0.5251067 | Novel | NO  | NO  | NO  | NO  |
| SPAC23H3.04   | SPAC6F6.08c  | 0.525096  | Novel | NO  | NO  | NO  | NO  |
| SPBC3E7.08c   | SPAC821.08c  | 0.5246783 | Novel | NO  | NO  | NO  | YES |
| SPAC57A7.08   | SPCC622.09   | 0.5245892 | Novel | NO  | NO  | NO  | NO  |
| SPBC1685.15c  | SPAC22H10.07 | 0.5245699 | Novel | NO  | YES | NO  | YES |
| SPAC23A1.06c  | SPAC17A2.13c | 0.5243357 | Novel | NO  | YES | NO  | YES |
| SPBC16C6.09   | SPAC23H3.04  | 0.5242011 | Novel | YES | NO  | NO  | NO  |
| SPAC16.01     | SPAC23H3.04  | 0.5241032 | Novel | NO  | NO  | NO  | NO  |
| SPBC543.07    | SPBC776.02c  | 0.5240203 | Novel | YES | NO  | NO  | YES |
| SPBC12D12.08c | SPAC23H3.04  | 0.5239059 | Novel | NO  | NO  | NO  | NO  |
| SPAC1805.12c  | SPAC17H9.19c | 0.5238707 | Novel | NO  | NO  | NO  | NO  |

|               |               |           |       |     |     |     |     |
|---------------|---------------|-----------|-------|-----|-----|-----|-----|
| SPAC17H9.19c  | SPAC11G7.04   | 0.5238707 | Novel | NO  | NO  | NO  | NO  |
| SPAC24B11.06c | SPCC1259.13   | 0.5238104 | Novel | YES | YES | YES | YES |
| SPCC16C4.11   | SPBC18H10.15  | 0.5234574 | Novel | NO  | YES | YES | NO  |
| SPAC1805.12c  | SPAC17G6.12   | 0.5230094 | Novel | NO  | NO  | NO  | NO  |
| SPAC17G6.12   | SPAC11G7.04   | 0.5230094 | Novel | NO  | NO  | NO  | NO  |
| SPAC1805.12c  | SPCC11E10.08  | 0.5230077 | Novel | NO  | NO  | NO  | NO  |
| SPAC11G7.04   | SPCC11E10.08  | 0.5230077 | Novel | NO  | NO  | NO  | NO  |
| SPAC24H6.05   | SPBC1198.12   | 0.5228235 | Novel | NO  | YES | NO  | NO  |
| SPAC23H3.04   | SPCC306.04c   | 0.5228022 | Novel | NO  | NO  | NO  | NO  |
| SPAC24H6.03   | SPAC11G7.04   | 0.5227681 | Novel | NO  | NO  | NO  | NO  |
| SPAC1805.12c  | SPAC24H6.03   | 0.5227681 | Novel | NO  | NO  | NO  | NO  |
| SPAC23H3.04   | SPAC23A1.06c  | 0.5226466 | Novel | NO  | NO  | NO  | NO  |
| SPAC6G9.06c   | SPCC1682.04   | 0.5225448 | Novel | NO  | NO  | NO  | NO  |
| SPAC23H3.04   | SPAC8F11.07c  | 0.5224376 | Novel | NO  | NO  | NO  | NO  |
| SPAC23H3.04   | SPAC17H9.19c  | 0.5224134 | Novel | NO  | NO  | NO  | NO  |
| SPAC110.03    | SPAC23H3.04   | 0.5224053 | Novel | NO  | NO  | NO  | NO  |
| SPAC23H3.04   | SPBC19C2.05   | 0.5223682 | Novel | NO  | NO  | NO  | NO  |
| SPCC1322.12c  | SPBC19F8.07   | 0.5223217 | Novel | NO  | YES | YES | YES |
| SPAC23H3.04   | SPBC16D10.09  | 0.5222147 | Novel | NO  | NO  | NO  | NO  |
| SPCC1672.10   | SPAC23C11.15  | 0.5220407 | Novel | NO  | YES | YES | NO  |
| SPCC1672.10   | SPAC23H4.12   | 0.521959  | Novel | YES | YES | YES | NO  |
| SPAC31G5.09c  | SPAC1D4.06c   | 0.5217203 | Novel | NO  | YES | YES | NO  |
| SPCC16C4.11   | SPAC23H3.04   | 0.5216668 | Novel | NO  | NO  | NO  | NO  |
| SPAC24B11.06c | SPAC644.06c   | 0.5216556 | Novel | YES | YES | YES | YES |
| SPBC582.03    | SPBC16A3.11   | 0.521554  | Novel | NO  | YES | NO  | YES |
| SPCC18B5.03   | SPAC23H3.04   | 0.521313  | Novel | NO  | NO  | NO  | NO  |
| SPAC9G1.09    | SPBC119.08    | 0.5213114 | Novel | NO  | YES | YES | NO  |
| SPCC736.14    | SPBC26H8.07c  | 0.5212694 | Novel | NO  | NO  | NO  | YES |
| SPCC1672.10   | SPBC36.05c    | 0.5211162 | Novel | YES | YES | YES | NO  |
| SPBC19C7.03   | SPBC119.08    | 0.5208174 | Novel | NO  | YES | NO  | NO  |
| SPBC887.10    | SPBC19F8.07   | 0.5207238 | Novel | YES | NO  | NO  | YES |
| SPAC24B11.11c | SPCC31H12.05c | 0.5206944 | Novel | NO  | NO  | NO  | NO  |
| SPCC1322.08   | SPBC19F8.07   | 0.5205837 | Novel | YES | YES | YES | YES |
| SPAC23H3.04   | SPBC11B10.09  | 0.5203586 | Novel | NO  | NO  | NO  | NO  |
| SPAC23H3.04   | SPAC821.04c   | 0.5200598 | Novel | NO  | NO  | NO  | NO  |
| SPAC23H3.04   | SPAC29A4.02c  | 0.5200077 | Novel | NO  | NO  | NO  | NO  |
| SPAC23H3.04   | SPCC338.16    | 0.5197989 | Novel | NO  | NO  | NO  | NO  |
| SPCC553.07c   | SPAC23H3.04   | 0.5197818 | Novel | NO  | NO  | NO  | NO  |
| SPAC23H3.04   | SPCC126.02c   | 0.5197634 | Novel | NO  | NO  | NO  | NO  |
| SPAC23H3.04   | SPAC144.13c   | 0.5197254 | Novel | NO  | NO  | NO  | NO  |
| SPAC23H3.04   | SPAC20G8.01   | 0.51967   | Novel | NO  | NO  | NO  | NO  |
| SPBC13G1.11   | SPBC1703.10   | 0.5196629 | Novel | NO  | NO  | YES | NO  |
| SPAC23H3.04   | SPAC9E9.08    | 0.5196288 | Novel | NO  | NO  | NO  | NO  |
| SPAC23H3.04   | SPBC29A10.15  | 0.5196069 | Novel | NO  | NO  | NO  | NO  |
| SPAC23H3.04   | SPCC970.01    | 0.5195945 | Novel | NO  | NO  | NO  | NO  |
| SPAC23H3.04   | SPBC1703.14c  | 0.5195532 | Novel | NO  | NO  | NO  | NO  |
| SPAC23H3.04   | SPBC215.03c   | 0.5195289 | Novel | NO  | NO  | NO  | NO  |

|               |               |           |       |     |     |     |     |
|---------------|---------------|-----------|-------|-----|-----|-----|-----|
| SPAC23H3.04   | SPBC342.05    | 0.519517  | Novel | NO  | NO  | NO  | NO  |
| SPAC23H3.04   | SPBC1921.05   | 0.5194722 | Novel | NO  | NO  | NO  | NO  |
| SPAC23H3.04   | SPAC26A3.02   | 0.51943   | Novel | NO  | NO  | NO  | NO  |
| SPAC23H3.04   | SPBC685.09    | 0.5194261 | Novel | NO  | NO  | NO  | NO  |
| SPAC23H3.04   | SPBC17D11.06  | 0.5193691 | Novel | NO  | NO  | NO  | NO  |
| SPAC23H3.04   | SPAC644.14c   | 0.5193081 | Novel | NO  | NO  | NO  | NO  |
| SPAC821.06    | SPAC23H3.04   | 0.5192116 | Novel | NO  | NO  | NO  | NO  |
| SPAC2G11.11c  | SPAC17A2.13c  | 0.5189869 | Novel | NO  | NO  | NO  | NO  |
| SPBC1711.05   | SPAC12G12.13c | 0.5188527 | Novel | YES | NO  | NO  | NO  |
| SPAC31G5.09c  | SPAC23C4.08   | 0.5187639 | Novel | NO  | NO  | NO  | NO  |
| SPAC821.12    | SPAC23H3.04   | 0.518733  | Novel | NO  | NO  | NO  | NO  |
| SPCC645.05c   | SPAC27F1.02c  | 0.5186688 | Novel | YES | YES | YES | YES |
| SPBC1105.17   | SPAC29A4.18   | 0.5184803 | Novel | NO  | YES | NO  | NO  |
| SPAC23H3.04   | SPCC320.13c   | 0.5184168 | Novel | NO  | NO  | NO  | NO  |
| SPBC582.03    | SPAC19E9.03   | 0.5182869 | Novel | NO  | YES | YES | YES |
| SPBC342.05    | SPBC19F8.07   | 0.5180868 | Novel | NO  | NO  | NO  | YES |
| SPBC1685.15c  | SPAC17H9.17c  | 0.5180418 | Novel | NO  | NO  | NO  | YES |
| SPAC23D3.09   | SPAC1805.07c  | 0.5176967 | Novel | NO  | NO  | NO  | NO  |
| SPCC16C4.11   | SPCC330.10    | 0.5176128 | Novel | NO  | NO  | NO  | NO  |
| SPAC821.12    | SPBC21.06c    | 0.5173282 | Novel | NO  | YES | YES | YES |
| SPAC16.01     | SPAC18B11.07c | 0.5172861 | Novel | NO  | NO  | NO  | NO  |
| SPAC13D6.04c  | SPAC23H3.04   | 0.5172708 | Novel | NO  | NO  | NO  | NO  |
| SPAC23H3.04   | SPCC1322.08   | 0.5172427 | Novel | NO  | NO  | NO  | NO  |
| SPBC685.09    | SPBC19F8.07   | 0.5172272 | Novel | NO  | NO  | NO  | YES |
| SPAC24B11.06c | SPAC823.15    | 0.5171369 | Novel | NO  | NO  | NO  | NO  |
| SPAC23H3.04   | SPAC1556.01c  | 0.5171041 | Novel | NO  | NO  | NO  | NO  |
| SPAC23H3.04   | SPBC19F8.07   | 0.5170697 | Novel | NO  | NO  | NO  | NO  |
| SPAC23H3.04   | SPAC1687.05   | 0.517025  | Novel | NO  | NO  | NO  | NO  |
| SPAC22E12.14c | SPCC1753.02c  | 0.5169248 | Novel | NO  | NO  | NO  | NO  |
| SPAC23H3.04   | SPBC543.03c   | 0.5169125 | Novel | NO  | NO  | NO  | NO  |
| SPAC22F3.09c  | SPAC821.08c   | 0.5168871 | Novel | NO  | YES | NO  | YES |
| SPBC32F12.09  | SPAC821.08c   | 0.5168807 | Novel | NO  | NO  | NO  | YES |
| SPAC23H3.04   | SPBC25B2.06c  | 0.5168685 | Novel | NO  | NO  | YES | NO  |
| SPCC330.11    | SPAC23H3.04   | 0.5168315 | Novel | NO  | NO  | NO  | NO  |
| SPAC17G8.03c  | SPAC23H3.04   | 0.5167662 | Novel | NO  | NO  | NO  | NO  |
| SPAC23H3.04   | SPAC22A12.03c | 0.5167598 | Novel | NO  | NO  | NO  | NO  |
| SPBC29A3.14c  | SPAC23H3.04   | 0.5167229 | Novel | NO  | NO  | NO  | NO  |
| SPAC23H3.04   | SPCC1494.05c  | 0.5167133 | Novel | NO  | NO  | NO  | NO  |
| SPAC23H3.04   | SPBC17D11.01  | 0.5166412 | Novel | NO  | NO  | NO  | NO  |
| SPAC23H3.04   | SPBC19C2.09   | 0.5166377 | Novel | NO  | NO  | NO  | NO  |
| SPBC19C2.01   | SPAC644.12    | 0.5165845 | Novel | YES | NO  | YES | NO  |
| SPAC23H3.04   | SPBC1198.12   | 0.5165739 | Novel | NO  | NO  | NO  | NO  |
| SPAC1952.07   | SPAC821.08c   | 0.5165105 | Novel | NO  | YES | YES | YES |
| SPAC23H3.04   | SPAC23C4.18c  | 0.5163894 | Novel | NO  | NO  | NO  | NO  |
| SPAC23H3.04   | SPAC14C4.03   | 0.5163128 | Novel | NO  | NO  | NO  | NO  |
| SPAC6F6.08c   | SPBC18H10.15  | 0.5163023 | Novel | NO  | NO  | NO  | NO  |
| SPCC576.17c   | SPCC794.03    | 0.5162942 | Novel | NO  | NO  | NO  | NO  |



|               |               |           |       |     |     |     |     |
|---------------|---------------|-----------|-------|-----|-----|-----|-----|
| SPAC23H3.04   | SPBC17F3.02   | 0.5162057 | Novel | NO  | NO  | NO  | NO  |
| SPAC1687.13c  | SPAC23H3.04   | 0.5162047 | Novel | NO  | NO  | NO  | NO  |
| SPAC1834.03c  | SPAC23D3.09   | 0.5161627 | Novel | NO  | NO  | NO  | NO  |
| SPBC1105.12   | SPAC23D3.09   | 0.5161627 | Novel | NO  | NO  | NO  | NO  |
| SPBC8D2.03c   | SPAC23D3.09   | 0.5161627 | Novel | NO  | NO  | NO  | NO  |
| SPAC227.16c   | SPAC23H3.04   | 0.5161539 | Novel | NO  | NO  | NO  | NO  |
| SPAC31G5.09c  | SPAC23H3.04   | 0.516105  | Novel | NO  | NO  | NO  | NO  |
| SPBC16E9.10c  | SPCC5E4.04    | 0.516063  | Novel | NO  | NO  | NO  | NO  |
| SPAC24B11.06c | SPAC2C4.14c   | 0.516041  | Novel | NO  | YES | YES | NO  |
| SPAC23H3.04   | SPBC119.02    | 0.5159515 | Novel | NO  | NO  | NO  | NO  |
| SPAC24B11.06c | SPAC23H3.04   | 0.5159385 | Novel | NO  | NO  | NO  | NO  |
| SPAC21E11.03c | SPAC23H3.04   | 0.5159073 | Novel | NO  | NO  | NO  | NO  |
| SPAC23H3.04   | SPCC24B10.07  | 0.5157775 | Novel | NO  | NO  | NO  | NO  |
| SPAC23H3.04   | SPAC23H4.17c  | 0.5157008 | Novel | NO  | NO  | NO  | NO  |
| SPAC23H3.04   | SPCC622.08c   | 0.5156783 | Novel | NO  | NO  | NO  | NO  |
| SPAC19G12.06c | SPAC23H3.04   | 0.5156716 | Novel | NO  | NO  | NO  | NO  |
| SPCC16C4.11   | SPAC2F3.15    | 0.5156471 | Novel | NO  | YES | NO  | NO  |
| SPAC24B11.06c | SPAC21E11.03c | 0.5155702 | Novel | NO  | NO  | YES | YES |
| SPAC9G1.09    | SPBC1D7.05    | 0.5155593 | Novel | NO  | YES | YES | YES |
| SPAC23H3.04   | SPAC8E11.03c  | 0.515407  | Novel | NO  | NO  | NO  | NO  |
| SPAC23H3.04   | SPAC23H4.18c  | 0.5154003 | Novel | NO  | NO  | NO  | NO  |
| SPAC23H3.04   | SPBC776.02c   | 0.5153615 | Novel | NO  | NO  | NO  | NO  |
| SPCC16C4.11   | SPAC1F3.02c   | 0.5153358 | Novel | NO  | YES | YES | NO  |
| SPAC23H3.04   | SPAC823.15    | 0.5152445 | Novel | NO  | NO  | NO  | NO  |
| SPAC23H3.04   | SPBC106.10    | 0.5151222 | Novel | NO  | NO  | NO  | NO  |
| SPAC9E9.13    | SPBC19F8.07   | 0.5149132 | Novel | NO  | NO  | NO  | YES |
| SPAC23H3.04   | SPBC16H5.07c  | 0.5146939 | Novel | NO  | NO  | NO  | NO  |
| SPAC23H3.04   | SPCC31H12.05c | 0.514684  | Novel | NO  | NO  | NO  | NO  |
| SPAC23H3.04   | SPBC1D7.04    | 0.51466   | Novel | NO  | NO  | NO  | NO  |
| SPAC22E12.14c | SPAC23H3.04   | 0.5145802 | Novel | NO  | NO  | NO  | NO  |
| SPBC1198.12   | SPCC5E4.04    | 0.5145747 | Novel | YES | YES | NO  | YES |
| SPAC23H3.04   | SPAC4F10.11   | 0.5145539 | Novel | NO  | NO  | NO  | NO  |
| SPAC23H3.04   | SPBC1D7.05    | 0.514431  | Novel | YES | NO  | NO  | NO  |
| SPAC27D7.13c  | SPAC23H3.04   | 0.5143958 | Novel | NO  | NO  | NO  | NO  |
| SPCC1795.11   | SPBC19F8.07   | 0.514361  | Novel | YES | YES | NO  | YES |
| SPAC57A7.04c  | SPAC23H3.04   | 0.5143039 | Novel | NO  | NO  | NO  | NO  |
| SPAC23H3.04   | SPBC119.08    | 0.5141958 | Novel | NO  | NO  | NO  | NO  |
| SPAC23H3.04   | SPAC19D5.04   | 0.5141661 | Novel | NO  | NO  | NO  | NO  |
| SPAC4A8.05c   | SPAC23H3.04   | 0.5141301 | Novel | NO  | NO  | NO  | NO  |
| SPAC23H3.04   | SPAC1610.03c  | 0.514124  | Novel | NO  | NO  | NO  | NO  |
| SPAC23H3.04   | SPAC1687.15   | 0.5141142 | Novel | NO  | NO  | NO  | NO  |
| SPBC543.07    | SPAC23H3.04   | 0.5141097 | Novel | NO  | NO  | NO  | NO  |
| SPAC23H3.04   | SPCC1739.14   | 0.5140991 | Novel | NO  | NO  | NO  | NO  |
| SPBC32F12.09  | SPBC19F8.07   | 0.514083  | Novel | NO  | NO  | NO  | YES |
| SPAC23H3.04   | SPAC3C7.08c   | 0.5140828 | Novel | NO  | NO  | NO  | NO  |
| SPAC3C7.12    | SPAC23H3.04   | 0.5140744 | Novel | NO  | NO  | NO  | NO  |
| SPAC23H3.04   | SPCC1739.12   | 0.5140382 | Novel | NO  | NO  | NO  | NO  |

|               |               |           |       |     |     |     |     |
|---------------|---------------|-----------|-------|-----|-----|-----|-----|
| SPAC3G9.12    | SPAC23H3.04   | 0.5140224 | Novel | NO  | NO  | NO  | NO  |
| SPAC23H3.04   | SPAC1F5.09c   | 0.5139932 | Novel | NO  | NO  | NO  | NO  |
| SPAC1D4.13    | SPAC23H3.04   | 0.5139815 | Novel | NO  | NO  | NO  | NO  |
| SPCC576.15c   | SPAC23H3.04   | 0.5139798 | Novel | NO  | NO  | NO  | NO  |
| SPAC1D4.13    | SPBC19F8.07   | 0.5139004 | Novel | NO  | YES | YES | NO  |
| SPAC23H3.04   | SPAC18G6.02c  | 0.5138833 | Novel | NO  | NO  | NO  | NO  |
| SPBC660.14    | SPAC23H3.04   | 0.5138525 | Novel | NO  | NO  | NO  | NO  |
| SPAC17G6.14c  | SPAC23H3.04   | 0.5137853 | Novel | NO  | NO  | NO  | NO  |
| SPAC23H3.04   | SPBC216.02    | 0.5137757 | Novel | NO  | NO  | NO  | NO  |
| SPAC23H3.04   | SPBC337.08c   | 0.51377   | Novel | NO  | NO  | NO  | NO  |
| SPAC1B9.02c   | SPAC23H3.04   | 0.5137062 | Novel | NO  | NO  | NO  | NO  |
| SPAC23H3.04   | SPCC736.11    | 0.5136819 | Novel | NO  | NO  | NO  | NO  |
| SPAC23H3.04   | SPBC1604.14c  | 0.5136431 | Novel | NO  | NO  | NO  | NO  |
| SPAC23H3.04   | SPAP27G11.10c | 0.5136318 | Novel | NO  | NO  | NO  | NO  |
| SPBC19F8.07   | SPBC14C8.07c  | 0.513611  | Novel | NO  | YES | NO  | YES |
| SPCC5E4.03c   | SPAC23H3.04   | 0.5134651 | Novel | NO  | NO  | NO  | NO  |
| SPAC23H3.04   | SPAC821.08c   | 0.5134328 | Novel | NO  | NO  | NO  | NO  |
| SPAC23H3.04   | SPAC17A5.11   | 0.5134145 | Novel | NO  | NO  | NO  | NO  |
| SPBC337.08c   | SPAC11G7.04   | 0.5133824 | Novel | NO  | NO  | YES | YES |
| SPAC1805.12c  | SPBC337.08c   | 0.5133824 | Novel | NO  | NO  | NO  | YES |
| SPAC23H3.04   | SPBC1921.03c  | 0.5133449 | Novel | NO  | NO  | NO  | NO  |
| SPAC17H9.09c  | SPCC1682.16   | 0.5133062 | Novel | NO  | NO  | YES | NO  |
| SPAC926.04c   | SPBC19F8.07   | 0.5132958 | Novel | YES | YES | NO  | YES |
| SPBC119.08    | SPCC5E4.04    | 0.5132787 | Novel | YES | YES | NO  | NO  |
| SPAC23H3.04   | SPAC2F3.15    | 0.5131468 | Novel | NO  | NO  | NO  | NO  |
| SPAC23H3.04   | SPCC74.03c    | 0.5131059 | Novel | NO  | NO  | NO  | NO  |
| SPAC23H3.04   | SPAC11E3.04c  | 0.5130857 | Novel | NO  | NO  | NO  | NO  |
| SPAC57A7.08   | SPAC23H3.04   | 0.5129815 | Novel | NO  | NO  | NO  | NO  |
| SPAC23H3.04   | SPBC32H8.10   | 0.5128588 | Novel | NO  | NO  | NO  | NO  |
| SPAC23H3.04   | SPAC1687.01   | 0.5127665 | Novel | NO  | NO  | NO  | NO  |
| SPAC23H3.04   | SPAC19E9.02   | 0.5126261 | Novel | NO  | NO  | NO  | NO  |
| SPAC23H3.04   | SPAC18B11.07c | 0.5126187 | Novel | NO  | NO  | NO  | NO  |
| SPAC24B11.11c | SPBC16H5.07c  | 0.5124997 | Novel | NO  | NO  | NO  | YES |
| SPAC23H3.04   | SPAC644.06c   | 0.512476  | Novel | NO  | NO  | NO  | NO  |
| SPAC22E12.07  | SPAC20G8.08c  | 0.5124589 | Novel | NO  | NO  | NO  | NO  |
| SPAC23H3.04   | SPCC1919.10c  | 0.512384  | Novel | NO  | NO  | NO  | NO  |
| SPBC582.03    | SPBC2F12.11c  | 0.5123326 | Novel | NO  | NO  | NO  | YES |
| SPAC29A4.02c  | SPBC19F8.07   | 0.5123174 | Novel | NO  | NO  | NO  | YES |
| SPBC12D12.07c | SPAC1F7.04    | 0.5122683 | Novel | NO  | NO  | NO  | NO  |
| SPBC409.07c   | SPAC23H3.04   | 0.5121288 | Novel | NO  | NO  | NO  | NO  |
| SPAC23H3.04   | SPCC622.09    | 0.5120937 | Novel | NO  | NO  | NO  | NO  |
| SPAC23H3.04   | SPAC23C11.16  | 0.5120797 | Novel | NO  | NO  | NO  | NO  |
| SPAC4D7.05    | SPBC19F8.07   | 0.5119823 | Novel | NO  | NO  | NO  | YES |
| SPAC23H3.04   | SPBC146.13c   | 0.5119328 | Novel | NO  | NO  | NO  | NO  |
| SPCC777.14    | SPAC23H3.04   | 0.5119208 | Novel | NO  | NO  | NO  | NO  |
| SPAC23H3.04   | SPAC23C11.11  | 0.5118306 | Novel | NO  | NO  | NO  | NO  |
| SPAC23H3.04   | SPAC3G6.02    | 0.5118255 | Novel | NO  | NO  | NO  | NO  |

|               |               |           |       |     |     |     |     |
|---------------|---------------|-----------|-------|-----|-----|-----|-----|
| SPAC23H3.04   | SPAC19D5.03   | 0.5118166 | Novel | NO  | NO  | NO  | NO  |
| SPAC57A10.02  | SPAC23H3.04   | 0.5118061 | Novel | NO  | NO  | NO  | NO  |
| SPBC21C3.18   | SPAC23H3.04   | 0.511802  | Novel | NO  | NO  | NO  | NO  |
| SPAC23H3.04   | SPAC23C4.12   | 0.511717  | Novel | NO  | NO  | NO  | NO  |
| SPAC23H3.04   | SPBC12D12.02c | 0.5116757 | Novel | NO  | NO  | NO  | NO  |
| SPAC23H3.04   | SPAC9E9.07c   | 0.5116187 | Novel | NO  | NO  | NO  | NO  |
| SPCC297.03    | SPAC23H3.04   | 0.5116078 | Novel | NO  | NO  | NO  | NO  |
| SPAC23H3.04   | SPCC417.07c   | 0.5115045 | Novel | NO  | NO  | NO  | NO  |
| SPAC23H3.04   | SPBC4F6.06    | 0.5114987 | Novel | NO  | NO  | NO  | NO  |
| SPAC1D4.11c   | SPAC23H3.04   | 0.5114532 | Novel | NO  | NO  | NO  | NO  |
| SPAC23H3.04   | SPBC3D6.09    | 0.511448  | Novel | NO  | NO  | NO  | NO  |
| SPBC354.03    | SPAC23H3.04   | 0.5113739 | Novel | NO  | NO  | NO  | NO  |
| SPAC23H3.04   | SPAC806.08c   | 0.5113548 | Novel | NO  | NO  | NO  | NO  |
| SPAC23H3.04   | SPAC16E8.09   | 0.5113401 | Novel | NO  | NO  | NO  | NO  |
| SPAC23H3.04   | SPBC12D12.04c | 0.5113041 | Novel | NO  | NO  | NO  | NO  |
| SPAC23H3.04   | SPBC776.12c   | 0.5112858 | Novel | NO  | NO  | NO  | NO  |
| SPAC23H3.04   | SPAC23H3.05c  | 0.5112669 | Novel | NO  | NO  | NO  | NO  |
| SPAC3A11.12c  | SPBC646.09c   | 0.5112647 | Novel | NO  | NO  | NO  | NO  |
| SPAC23H3.04   | SPAC27E2.05   | 0.5112429 | Novel | NO  | NO  | NO  | NO  |
| SPBC582.03    | SPBC18H10.15  | 0.5112237 | Novel | NO  | NO  | NO  | NO  |
| SPAC23H3.04   | SPAC23D3.02   | 0.5112196 | Novel | NO  | NO  | NO  | NO  |
| SPAC23H3.04   | SPBC428.20c   | 0.5112043 | Novel | NO  | NO  | NO  | NO  |
| SPBC3H7.15    | SPAC23H3.04   | 0.5111983 | Novel | NO  | NO  | NO  | NO  |
| SPBC405.04c   | SPAC23H3.04   | 0.511186  | Novel | NO  | NO  | NO  | NO  |
| SPAC23H3.04   | SPAC11G7.04   | 0.5111598 | Novel | NO  | NO  | NO  | NO  |
| SPAC1805.12c  | SPAC23H3.04   | 0.5111598 | Novel | NO  | NO  | NO  | NO  |
| SPAC23H3.04   | SPAC17G8.14c  | 0.5111347 | Novel | NO  | NO  | NO  | NO  |
| SPBC146.03c   | SPBC19F8.07   | 0.5111087 | Novel | YES | YES | NO  | YES |
| SPAC3F10.11c  | SPAC23H3.04   | 0.5110989 | Novel | YES | NO  | NO  | NO  |
| SPCC1753.02c  | SPCC24B10.07  | 0.5110962 | Novel | NO  | NO  | NO  | NO  |
| SPAC23H3.04   | SPAC1F7.05    | 0.5110772 | Novel | NO  | NO  | NO  | NO  |
| SPAC23H3.04   | SPAC1F3.02c   | 0.5110627 | Novel | NO  | NO  | NO  | NO  |
| SPAC23H3.04   | SPAC1D4.06c   | 0.5110406 | Novel | NO  | NO  | NO  | NO  |
| SPAC23H3.04   | SPBC8D2.19    | 0.5110171 | Novel | NO  | NO  | NO  | NO  |
| SPBC24C6.07   | SPBC18H10.15  | 0.5110018 | Novel | NO  | NO  | NO  | NO  |
| SPBC1198.12   | SPCC1795.01c  | 0.5110017 | Novel | NO  | YES | NO  | YES |
| SPCC1259.15c  | SPAC23H3.04   | 0.5109991 | Novel | NO  | NO  | NO  | NO  |
| SPAC23H3.04   | SPBC211.06    | 0.5109774 | Novel | NO  | NO  | NO  | NO  |
| SPAC22E12.14c | SPCC576.15c   | 0.5109374 | Novel | NO  | YES | YES | NO  |
| SPAC23H3.04   | SPAC29A4.16   | 0.5109316 | Novel | NO  | NO  | NO  | NO  |
| SPAC23H3.04   | SPCC594.05c   | 0.5109121 | Novel | NO  | NO  | NO  | NO  |
| SPAC23H3.04   | SPBC18H10.06c | 0.5108982 | Novel | NO  | NO  | NO  | NO  |
| SPAC23H3.04   | SPAC3C7.06c   | 0.5108972 | Novel | NO  | NO  | NO  | NO  |
| SPBC16D10.04c | SPAC23H3.04   | 0.5108634 | Novel | NO  | NO  | NO  | NO  |
| SPBC32F12.04  | SPAC23H3.04   | 0.5108393 | Novel | NO  | NO  | NO  | NO  |
| SPAC23H3.04   | SPAC17H9.10c  | 0.510822  | Novel | NO  | NO  | NO  | NO  |
| SPBC3B9.11c   | SPAC23H3.04   | 0.510805  | Novel | NO  | NO  | NO  | NO  |

|               |               |           |       |     |     |     |     |
|---------------|---------------|-----------|-------|-----|-----|-----|-----|
| SPAC3A11.08   | SPAC23H3.04   | 0.5107818 | Novel | NO  | NO  | NO  | NO  |
| SPAC23H3.04   | SPCC1223.06   | 0.5107653 | Novel | NO  | NO  | NO  | NO  |
| SPAC23H3.04   | SPAC3H5.06c   | 0.5107644 | Novel | NO  | NO  | NO  | NO  |
| SPAC23H3.04   | SPBC365.15    | 0.5107521 | Novel | NO  | NO  | NO  | NO  |
| SPAC23H3.04   | SPCC1450.11c  | 0.5107442 | Novel | NO  | NO  | NO  | NO  |
| SPAC24H6.05   | SPAC23H4.17c  | 0.5107135 | Novel | NO  | NO  | NO  | NO  |
| SPAC23H3.04   | SPCC18.11c    | 0.5107131 | Novel | NO  | NO  | NO  | NO  |
| SPAC23H3.04   | SPCC663.12    | 0.510702  | Novel | NO  | NO  | NO  | NO  |
| SPAC23H3.04   | SPBC887.14c   | 0.5105997 | Novel | NO  | NO  | NO  | NO  |
| SPAC23H3.04   | SPBC13G1.08c  | 0.5105798 | Novel | NO  | NO  | NO  | NO  |
| SPAC23H3.04   | SPAC6G10.11c  | 0.5105389 | Novel | NO  | NO  | NO  | NO  |
| SPAC23H3.04   | SPAC589.10c   | 0.5105389 | Novel | NO  | NO  | NO  | NO  |
| SPAC23H3.04   | SPBC25D12.04  | 0.510512  | Novel | NO  | NO  | NO  | NO  |
| SPAC637.07    | SPAC23H3.04   | 0.5104696 | Novel | NO  | NO  | NO  | NO  |
| SPAC23H3.04   | SPAC30D11.13  | 0.5104694 | Novel | NO  | NO  | NO  | NO  |
| SPAC23H3.04   | SPAC13D6.01   | 0.5104333 | Novel | NO  | NO  | NO  | NO  |
| SPAC23H3.04   | SPBC530.14c   | 0.5104137 | Novel | NO  | NO  | NO  | NO  |
| SPAC23H3.04   | SPAC227.12    | 0.5102928 | Novel | NO  | NO  | NO  | NO  |
| SPAC222.07c   | SPAC23H3.04   | 0.5102841 | Novel | NO  | NO  | NO  | NO  |
| SPAC6B12.15   | SPAC23H3.04   | 0.5102353 | Novel | NO  | NO  | NO  | NO  |
| SPAC23H3.04   | SPAC9G1.02    | 0.5101756 | Novel | NO  | NO  | NO  | NO  |
| SPAC23H3.04   | SPAC1006.09   | 0.5101655 | Novel | NO  | NO  | NO  | NO  |
| SPAC23H3.04   | SPAC630.14c   | 0.5101371 | Novel | NO  | NO  | NO  | NO  |
| SPAC6B12.11   | SPBC19F8.07   | 0.5101206 | Novel | NO  | NO  | NO  | YES |
| SPAC23H3.04   | SPAC4C5.02c   | 0.5100705 | Novel | YES | NO  | NO  | NO  |
| SPAC17G8.09   | SPAC23H3.04   | 0.5100096 | Novel | NO  | NO  | NO  | NO  |
| SPAC23H3.04   | SPAC140.02    | 0.5100009 | Novel | NO  | NO  | NO  | NO  |
| SPBC1718.01   | SPBC19F8.07   | 0.5099541 | Novel | NO  | NO  | NO  | YES |
| SPAC23H3.04   | SPAC1565.06c  | 0.5099475 | Novel | NO  | NO  | NO  | NO  |
| SPBC21B10.05c | SPAC23H3.04   | 0.5098811 | Novel | NO  | NO  | NO  | NO  |
| SPAC17H9.09c  | SPAC23H3.04   | 0.5098209 | Novel | NO  | NO  | NO  | NO  |
| SPAC18G6.03   | SPAC23H3.04   | 0.5098201 | Novel | NO  | NO  | NO  | NO  |
| SPAC1F8.06    | SPAC23H3.04   | 0.5097219 | Novel | YES | NO  | NO  | NO  |
| SPAC23H3.04   | SPBC31F10.11c | 0.5097095 | Novel | NO  | NO  | NO  | NO  |
| SPAC29A4.16   | SPCC1322.08   | 0.5096913 | Novel | NO  | YES | YES | YES |
| SPAC23H3.04   | SPBC32H8.02c  | 0.5096487 | Novel | NO  | NO  | NO  | NO  |
| SPAC23H3.04   | SPAC12G12.14c | 0.5095949 | Novel | NO  | NO  | NO  | NO  |
| SPAC23H3.04   | SPBC14C8.07c  | 0.5095865 | Novel | NO  | NO  | NO  | NO  |
| SPAC23H3.04   | SPAC2F7.03c   | 0.5095673 | Novel | NO  | NO  | NO  | NO  |
| SPAC1805.15c  | SPAC23H3.04   | 0.509555  | Novel | NO  | NO  | NO  | NO  |
| SPAC2F7.03c   | SPBC32C12.03c | 0.5095464 | Novel | NO  | YES | YES | NO  |
| SPAC18B11.10  | SPAC23H3.04   | 0.5095397 | Novel | NO  | NO  | NO  | NO  |
| SPAC1687.03c  | SPAC23H3.04   | 0.5095328 | Novel | NO  | NO  | NO  | NO  |
| SPAC29A4.18   | SPCC970.12    | 0.5094232 | Novel | NO  | YES | YES | NO  |
| SPAC23H3.04   | SPAC11G7.02   | 0.5094142 | Novel | YES | NO  | NO  | NO  |
| SPAC23H3.04   | SPAC688.11    | 0.5093572 | Novel | NO  | NO  | NO  | NO  |
| SPBC16G5.15c  | SPAC23H3.04   | 0.5093314 | Novel | NO  | NO  | NO  | NO  |

|               |               |           |       |     |     |    |    |
|---------------|---------------|-----------|-------|-----|-----|----|----|
| SPCC970.10c   | SPAC23H3.04   | 0.5093188 | Novel | NO  | NO  | NO | NO |
| SPAC23H3.04   | SPBC1289.11   | 0.5093133 | Novel | NO  | NO  | NO | NO |
| SPAC23H3.04   | SPBC30D10.10c | 0.5093097 | Novel | NO  | NO  | NO | NO |
| SPBC32F12.05c | SPAC23H3.04   | 0.5092718 | Novel | NO  | NO  | NO | NO |
| SPBC216.07c   | SPAC23H3.04   | 0.5092656 | Novel | NO  | NO  | NO | NO |
| SPAC23H3.04   | SPBC18H10.03  | 0.509256  | Novel | NO  | NO  | NO | NO |
| SPAC23H3.04   | SPAC30D11.07  | 0.5092484 | Novel | NO  | NO  | NO | NO |
| SPAC824.04    | SPAC23H3.04   | 0.5092241 | Novel | NO  | NO  | NO | NO |
| SPAC23H3.04   | SPAC8C9.17c   | 0.5092126 | Novel | NO  | NO  | NO | NO |
| SPAC31G5.01   | SPAC23H3.04   | 0.5092008 | Novel | NO  | NO  | NO | NO |
| SPAC23H3.04   | SPAC22F3.05c  | 0.5091965 | Novel | NO  | NO  | NO | NO |
| SPAC23H3.04   | SPAC20G4.03c  | 0.5091884 | Novel | NO  | NO  | NO | NO |
| SPAC23H3.04   | SPBC337.06c   | 0.5091858 | Novel | NO  | NO  | NO | NO |
| SPAC17G6.16c  | SPAC23H3.04   | 0.5091779 | Novel | NO  | NO  | NO | NO |
| SPAC23H3.04   | SPAC27E2.10c  | 0.5091354 | Novel | NO  | NO  | NO | NO |
| SPAC23H3.04   | SPAC10F6.09c  | 0.5091038 | Novel | NO  | NO  | NO | NO |
| SPAC4D7.03    | SPAC23H3.04   | 0.5090992 | Novel | NO  | NO  | NO | NO |
| SPBC19C7.03   | SPCC4G3.08    | 0.5090899 | Novel | NO  | YES | NO | NO |
| SPAC22E12.07  | SPAC23H3.04   | 0.5090813 | Novel | NO  | NO  | NO | NO |
| SPCC162.08c   | SPAC23H3.04   | 0.5090111 | Novel | NO  | NO  | NO | NO |
| SPAC56F8.16   | SPAC23H3.04   | 0.5090083 | Novel | NO  | NO  | NO | NO |
| SPAC23H3.04   | SPAC13G7.08c  | 0.5089867 | Novel | NO  | NO  | NO | NO |
| SPAC23H3.04   | SPAC1565.04c  | 0.5089857 | Novel | NO  | NO  | NO | NO |
| SPAC23H3.04   | SPCC1322.12c  | 0.5089509 | Novel | NO  | NO  | NO | NO |
| SPAC23H3.04   | SPBC1289.03c  | 0.5089477 | Novel | NO  | NO  | NO | NO |
| SPAC23H3.04   | SPBC428.08c   | 0.508933  | Novel | NO  | NO  | NO | NO |
| SPAC2F7.11    | SPAC23H3.04   | 0.5089084 | Novel | NO  | NO  | NO | NO |
| SPAC23H3.04   | SPBC800.05c   | 0.5088928 | Novel | NO  | NO  | NO | NO |
| SPAC3A12.13c  | SPAC23H3.04   | 0.5088791 | Novel | NO  | NO  | NO | NO |
| SPAC23H3.04   | SPAC23C4.19   | 0.5088553 | Novel | NO  | NO  | NO | NO |
| SPAC23H3.04   | SPAC30.04c    | 0.5088379 | Novel | YES | NO  | NO | NO |
| SPAC23H3.04   | SPAC2G11.08c  | 0.5088318 | Novel | NO  | NO  | NO | NO |
| SPBC2F12.09c  | SPAC23H3.04   | 0.5088309 | Novel | NO  | NO  | NO | NO |
| SPCC1450.09c  | SPAC23H3.13c  | 0.5088218 | Novel | NO  | NO  | NO | NO |
| SPAC23H3.04   | SPBC32H8.07   | 0.5088195 | Novel | NO  | NO  | NO | NO |
| SPAC24H6.03   | SPAC23H3.04   | 0.5088149 | Novel | NO  | NO  | NO | NO |
| SPCC825.03c   | SPAC23H3.04   | 0.5088144 | Novel | YES | NO  | NO | NO |
| SPAC17H9.05   | SPAC23H3.04   | 0.5088031 | Novel | NO  | NO  | NO | NO |
| SPBC336.12c   | SPAC2C4.14c   | 0.5088016 | Novel | NO  | NO  | NO | NO |
| SPAC23H3.04   | SPBC26H8.07c  | 0.5087987 | Novel | NO  | NO  | NO | NO |
| SPAC23H3.04   | SPAC57A10.05c | 0.5087973 | Novel | NO  | NO  | NO | NO |
| SPAC6G9.06c   | SPAC23H3.04   | 0.5087958 | Novel | NO  | NO  | NO | NO |
| SPAC23H3.04   | SPBC9B6.10    | 0.5087916 | Novel | NO  | NO  | NO | NO |
| SPAC23H3.04   | SPBC16A3.15c  | 0.5087841 | Novel | NO  | NO  | NO | NO |
| SPAC23H3.04   | SPBC25B2.05   | 0.5087614 | Novel | NO  | NO  | NO | NO |
| SPAC23H3.04   | SPAC4A8.12c   | 0.5087597 | Novel | NO  | NO  | NO | NO |
| SPAC23H3.04   | SPAC14C4.02c  | 0.5087583 | Novel | NO  | NO  | NO | NO |

|               |               |           |       |     |    |     |     |
|---------------|---------------|-----------|-------|-----|----|-----|-----|
| SPAC23H3.04   | SPBC1604.17c  | 0.5087553 | Novel | NO  | NO | NO  | NO  |
| SPAC23H3.04   | SPAC29B12.06c | 0.5087517 | Novel | NO  | NO | NO  | NO  |
| SPAC23H3.04   | SPBC15D4.14   | 0.508742  | Novel | NO  | NO | NO  | NO  |
| SPBC3E7.13c   | SPAC23H3.04   | 0.508742  | Novel | NO  | NO | NO  | NO  |
| SPAC23H3.04   | SPAC9E9.10c   | 0.508705  | Novel | NO  | NO | NO  | NO  |
| SPBC646.13    | SPBC19F8.07   | 0.5087046 | Novel | NO  | NO | NO  | YES |
| SPAC23H3.04   | SPAC27F1.04c  | 0.5087006 | Novel | NO  | NO | NO  | NO  |
| SPAC23H3.04   | SPAC17D4.03c  | 0.5086978 | Novel | YES | NO | NO  | NO  |
| SPAC23H3.04   | SPCC285.17    | 0.5086951 | Novel | NO  | NO | NO  | NO  |
| SPBC1718.01   | SPAC23H3.04   | 0.5086946 | Novel | NO  | NO | NO  | NO  |
| SPAC23H3.04   | SPBC119.04    | 0.5086891 | Novel | NO  | NO | NO  | NO  |
| SPAC23H3.04   | SPCC1795.11   | 0.5086867 | Novel | NO  | NO | NO  | NO  |
| SPBC1198.11c  | SPAC23H3.04   | 0.5086813 | Novel | NO  | NO | NO  | NO  |
| SPAC4F10.15c  | SPAC23H3.04   | 0.5086782 | Novel | NO  | NO | NO  | NO  |
| SPBC9B6.05c   | SPAC23H3.04   | 0.5086729 | Novel | NO  | NO | NO  | NO  |
| SPAC23H3.04   | SPBP22H7.07   | 0.5086725 | Novel | NO  | NO | NO  | NO  |
| SPAC23H3.04   | SPAC29B12.02c | 0.5086697 | Novel | NO  | NO | NO  | NO  |
| SPAC23H3.04   | SPBC4B4.07c   | 0.5086697 | Novel | NO  | NO | NO  | NO  |
| SPBC31E1.05   | SPAC23H3.04   | 0.5086671 | Novel | NO  | NO | NO  | NO  |
| SPAC23H3.04   | SPCC1183.05c  | 0.5086613 | Novel | NO  | NO | NO  | NO  |
| SPAC343.03    | SPAC23H3.04   | 0.5086567 | Novel | NO  | NO | NO  | NO  |
| SPAC23H3.04   | SPBC17D11.05  | 0.5086495 | Novel | NO  | NO | NO  | NO  |
| SPBC1A4.05    | SPAC23H3.04   | 0.5086462 | Novel | NO  | NO | YES | NO  |
| SPAC23H3.04   | SPAC664.10    | 0.5086448 | Novel | NO  | NO | NO  | NO  |
| SPAC24H6.05   | SPAC144.13c   | 0.5086316 | Novel | NO  | NO | NO  | YES |
| SPAC23H3.04   | SPBC1105.06   | 0.5086296 | Novel | NO  | NO | NO  | NO  |
| SPAC23H3.04   | SPAC20H4.07   | 0.5086122 | Novel | NO  | NO | NO  | NO  |
| SPAC23H3.04   | SPCC338.05c   | 0.5085821 | Novel | NO  | NO | NO  | NO  |
| SPAC23H3.04   | SPCC962.06c   | 0.5085821 | Novel | NO  | NO | NO  | NO  |
| SPAC23H3.04   | SPAC12G12.13c | 0.5085804 | Novel | NO  | NO | NO  | NO  |
| SPAC23H3.04   | SPBC947.12    | 0.5085736 | Novel | NO  | NO | NO  | NO  |
| SPAC23H3.04   | SPBC83.04     | 0.5085598 | Novel | NO  | NO | NO  | NO  |
| SPAC31G5.13   | SPAC23H3.04   | 0.5085576 | Novel | NO  | NO | NO  | NO  |
| SPAC23H3.04   | SPBC409.06    | 0.5085569 | Novel | NO  | NO | NO  | NO  |
| SPBC13G1.11   | SPAC23H3.04   | 0.5085527 | Novel | YES | NO | NO  | NO  |
| SPAC3A11.14c  | SPAC23H3.04   | 0.5085458 | Novel | NO  | NO | NO  | NO  |
| SPAC23H3.04   | SPBC1604.08c  | 0.5085419 | Novel | NO  | NO | NO  | NO  |
| SPAC23H3.04   | SPBC14F5.12c  | 0.5085301 | Novel | NO  | NO | NO  | NO  |
| SPBC23E6.07c  | SPAC23H3.04   | 0.5085262 | Novel | NO  | NO | NO  | NO  |
| SPAC23H3.04   | SPAC688.02c   | 0.5085254 | Novel | NO  | NO | NO  | NO  |
| SPAC23H3.04   | SPBC23E6.09   | 0.5085239 | Novel | NO  | NO | NO  | NO  |
| SPAC23H3.04   | SPBC1289.12   | 0.5085205 | Novel | NO  | NO | NO  | NO  |
| SPAC23H3.04   | SPAC631.01c   | 0.5085177 | Novel | NO  | NO | NO  | NO  |
| SPCC16A11.05c | SPBC19F8.07   | 0.508516  | Novel | NO  | NO | NO  | YES |
| SPCC1753.02c  | SPCC1450.09c  | 0.5085152 | Novel | NO  | NO | NO  | NO  |
| SPAC23H3.04   | SPBC146.03c   | 0.5085149 | Novel | NO  | NO | NO  | NO  |
| SPAC23H3.04   | SPAC9G1.05    | 0.5085095 | Novel | NO  | NO | NO  | NO  |

|               |               |           |       |     |     |     |     |
|---------------|---------------|-----------|-------|-----|-----|-----|-----|
| SPAC23H3.04   | SPBC13E7.02   | 0.5085022 | Novel | NO  | NO  | NO  | NO  |
| SPAC23H3.04   | SPBPJ4664.01  | 0.5085021 | Novel | NO  | NO  | NO  | NO  |
| SPAC23H3.04   | SPAC20G4.06c  | 0.5084999 | Novel | NO  | NO  | NO  | NO  |
| SPAC23H3.04   | SPAC17G6.12   | 0.5084963 | Novel | NO  | NO  | NO  | NO  |
| SPCC1672.10   | SPAC23H3.04   | 0.5084795 | Novel | NO  | NO  | NO  | NO  |
| SPAC23H3.04   | SPAC4F8.13c   | 0.5084679 | Novel | NO  | NO  | NO  | NO  |
| SPBC336.08    | SPAC23H3.04   | 0.5084633 | Novel | NO  | NO  | NO  | NO  |
| SPAC23H3.04   | SPAC13F5.02c  | 0.5084604 | Novel | NO  | NO  | NO  | NO  |
| SPBC32F12.08c | SPAC23H3.04   | 0.5084577 | Novel | NO  | NO  | NO  | NO  |
| SPAC23H3.04   | SPAC458.05    | 0.5084552 | Novel | NO  | NO  | NO  | NO  |
| SPAC23H3.04   | SPAC6F12.02   | 0.5084541 | Novel | NO  | NO  | NO  | NO  |
| SPAC23H3.04   | SPBC6B1.10    | 0.5084429 | Novel | NO  | NO  | NO  | NO  |
| SPAC23H3.04   | SPBC83.14c    | 0.5084401 | Novel | NO  | NO  | NO  | NO  |
| SPAC23H3.04   | SPBC31F10.13c | 0.5084305 | Novel | NO  | NO  | NO  | NO  |
| SPAC23H3.04   | SPBC13E7.09   | 0.50842   | Novel | NO  | NO  | NO  | NO  |
| SPAC23H3.04   | SPBC1921.02   | 0.5084191 | Novel | NO  | NO  | NO  | NO  |
| SPAC23H3.04   | SPAC664.01c   | 0.5084191 | Novel | NO  | NO  | NO  | NO  |
| SPAC23H3.04   | SPAC1F3.06c   | 0.5083822 | Novel | NO  | NO  | NO  | NO  |
| SPAC23H3.04   | SPAC343.04c   | 0.5083802 | Novel | NO  | NO  | YES | NO  |
| SPBC428.16c   | SPAC23H3.04   | 0.5083798 | Novel | NO  | NO  | NO  | NO  |
| SPCC1672.02c  | SPAC23H3.04   | 0.5083773 | Novel | NO  | NO  | NO  | NO  |
| SPAC23H3.04   | SPAC17A2.09c  | 0.5083733 | Novel | NO  | NO  | NO  | NO  |
| SPAP8A3.09c   | SPAC23H3.04   | 0.5083723 | Novel | NO  | NO  | NO  | NO  |
| SPAC23H3.04   | SPAC222.10c   | 0.5083684 | Novel | NO  | NO  | NO  | NO  |
| SPAC23H3.04   | SPBC16A3.05c  | 0.5083681 | Novel | NO  | NO  | NO  | NO  |
| SPAC23H3.04   | SPBC18E5.03c  | 0.5083652 | Novel | NO  | NO  | NO  | NO  |
| SPAC23H3.04   | SPBC11C11.03  | 0.5083557 | Novel | NO  | NO  | NO  | NO  |
| SPAC23H3.04   | SPBC887.05c   | 0.5083522 | Novel | NO  | NO  | NO  | NO  |
| SPAC19D5.06c  | SPAC23H3.04   | 0.5083501 | Novel | NO  | NO  | NO  | NO  |
| SPAC23H3.04   | SPCC895.07    | 0.5083355 | Novel | NO  | NO  | NO  | NO  |
| SPAC23H3.04   | SPBC354.05c   | 0.5083304 | Novel | YES | NO  | NO  | NO  |
| SPAC23H3.04   | SPCC5E4.06    | 0.5083255 | Novel | NO  | NO  | NO  | NO  |
| SPAC1F3.02c   | SPBC1604.14c  | 0.5083247 | Novel | YES | YES | YES | YES |
| SPAC23H3.04   | SPAC458.03    | 0.5083206 | Novel | NO  | NO  | NO  | NO  |
| SPAC22H10.10  | SPAC23H3.04   | 0.5083182 | Novel | NO  | NO  | NO  | NO  |
| SPAC23H3.04   | SPBC25D12.03c | 0.5083167 | Novel | NO  | NO  | NO  | NO  |
| SPBC336.07    | SPAC23H3.04   | 0.5083152 | Novel | NO  | NO  | NO  | NO  |
| SPBC19G7.05c  | SPBC19F8.07   | 0.5083148 | Novel | NO  | NO  | NO  | YES |
| SPAC23H3.04   | SPBC18H10.04c | 0.5083121 | Novel | NO  | NO  | NO  | NO  |
| SPAC23H3.04   | SPBC19G7.06   | 0.5083078 | Novel | NO  | NO  | NO  | NO  |
| SPAC23H3.04   | SPCC188.07    | 0.5082965 | Novel | NO  | NO  | NO  | NO  |
| SPBC16D10.07c | SPAC23H3.04   | 0.5082941 | Novel | NO  | NO  | NO  | NO  |
| SPAC23H3.04   | SPAC19E9.03   | 0.5082851 | Novel | NO  | NO  | NO  | NO  |
| SPAC23H3.04   | SPCC1235.10c  | 0.5082814 | Novel | NO  | NO  | NO  | NO  |
| SPBC21C3.20c  | SPAC23H3.04   | 0.508276  | Novel | NO  | NO  | NO  | NO  |
| SPAC23H3.04   | SPAC1751.01c  | 0.508276  | Novel | NO  | NO  | NO  | NO  |
| SPAC23H3.04   | SPBP23A10.14c | 0.5082757 | Novel | NO  | NO  | NO  | NO  |

|               |                |           |       |     |    |    |    |
|---------------|----------------|-----------|-------|-----|----|----|----|
| SPAC23H3.04   | SPAC29A4.18    | 0.5082742 | Novel | NO  | NO | NO | NO |
| SPBC800.09    | SPAC23H3.04    | 0.5082695 | Novel | NO  | NO | NO | NO |
| SPAC23H3.04   | SPCC736.04c    | 0.5082677 | Novel | YES | NO | NO | NO |
| SPAC57A7.11   | SPAC23H3.04    | 0.5082655 | Novel | NO  | NO | NO | NO |
| SPAC1420.03   | SPAC23H3.04    | 0.5082653 | Novel | NO  | NO | NO | NO |
| SPAC23H3.04   | SPAPB8E5.02c   | 0.5082653 | Novel | NO  | NO | NO | NO |
| SPAC23H3.04   | SPBC887.04c    | 0.5082627 | Novel | NO  | NO | NO | NO |
| SPAC23H3.04   | SPAPB17E12.04c | 0.5082625 | Novel | NO  | NO | NO | NO |
| SPAC23H3.04   | SPBC646.02     | 0.5082579 | Novel | NO  | NO | NO | NO |
| SPAC23H3.04   | SPBC609.02     | 0.5082521 | Novel | NO  | NO | NO | NO |
| SPAC23H3.04   | SPBC3D6.04c    | 0.5082513 | Novel | NO  | NO | NO | NO |
| SPAC23H3.04   | SPBC83.07      | 0.5082487 | Novel | NO  | NO | NO | NO |
| SPAC22E12.16c | SPAC23H3.04    | 0.5082448 | Novel | YES | NO | NO | NO |
| SPAC23H3.04   | SPAC1805.17    | 0.5082435 | Novel | NO  | NO | NO | NO |
| SPAC23H3.04   | SPBC2F12.11c   | 0.5082388 | Novel | NO  | NO | NO | NO |
| SPAC23H3.04   | SPBC28F2.12    | 0.5082378 | Novel | NO  | NO | NO | NO |
| SPAC959.09c   | SPAC23H3.04    | 0.5082318 | Novel | NO  | NO | NO | NO |
| SPAC23H3.04   | SPAC6G9.08     | 0.5082289 | Novel | NO  | NO | NO | NO |
| SPBP8B7.14c   | SPAC23H3.04    | 0.5082258 | Novel | NO  | NO | NO | NO |
| SPAC23H3.04   | SPBC29A10.04   | 0.5082225 | Novel | NO  | NO | NO | NO |
| SPAC23H3.04   | SPAC227.07c    | 0.5082224 | Novel | NO  | NO | NO | NO |
| SPBC3F6.03    | SPAC23H3.04    | 0.5082213 | Novel | NO  | NO | NO | NO |
| SPAC23H3.04   | SPAC31A2.05c   | 0.5082185 | Novel | NO  | NO | NO | NO |
| SPAC23H3.04   | SPBC19G7.16    | 0.5082144 | Novel | NO  | NO | NO | NO |
| SPAC23H3.04   | SPBC428.01c    | 0.5082138 | Novel | NO  | NO | NO | NO |
| SPAC23H3.04   | SPBC902.06     | 0.5082129 | Novel | NO  | NO | NO | NO |
| SPAC23H3.04   | SPBC15D4.10c   | 0.508209  | Novel | NO  | NO | NO | NO |
| SPAC23H3.04   | SPBC28E12.03   | 0.5082073 | Novel | NO  | NO | NO | NO |
| SPAC23H3.04   | SPBC27.02c     | 0.5081986 | Novel | NO  | NO | NO | NO |
| SPAC23H3.04   | SPAC26F1.10c   | 0.5081935 | Novel | NO  | NO | NO | NO |
| SPAC23H3.04   | SPAC23H3.13c   | 0.5081934 | Novel | NO  | NO | NO | NO |
| SPAC23H3.04   | SPCPIE11.07c   | 0.5081908 | Novel | NO  | NO | NO | NO |
| SPAC23H3.04   | SPAC6G10.02c   | 0.5081887 | Novel | NO  | NO | NO | NO |
| SPAC15A10.08  | SPAC23H3.04    | 0.5081866 | Novel | NO  | NO | NO | NO |
| SPAC18G6.15   | SPAC23H3.04    | 0.5081857 | Novel | NO  | NO | NO | NO |
| SPAC23H3.04   | SPBC1347.10    | 0.5081856 | Novel | NO  | NO | NO | NO |
| SPBC582.05c   | SPAC23H3.04    | 0.5081855 | Novel | NO  | NO | NO | NO |
| SPCC553.09c   | SPAC23H3.04    | 0.5081834 | Novel | NO  | NO | NO | NO |
| SPAC23H3.04   | SPAC25G10.07c  | 0.5081824 | Novel | NO  | NO | NO | NO |
| SPAC23H3.04   | SPAC23C11.15   | 0.5081779 | Novel | NO  | NO | NO | NO |
| SPAC23H3.04   | SPAC1834.03c   | 0.5081734 | Novel | NO  | NO | NO | NO |
| SPAC23H3.04   | SPBC8D2.03c    | 0.5081734 | Novel | NO  | NO | NO | NO |
| SPAC23H3.04   | SPBC1105.12    | 0.5081734 | Novel | NO  | NO | NO | NO |
| SPAC23H3.04   | SPBC16A3.08c   | 0.5081724 | Novel | NO  | NO | NO | NO |
| SPAC23H3.04   | SPCC16C4.08c   | 0.5081672 | Novel | NO  | NO | NO | NO |
| SPAC17A5.02c  | SPAC23H3.04    | 0.5081651 | Novel | NO  | NO | NO | NO |
| SPAC23H3.04   | SPAC688.06c    | 0.5081642 | Novel | NO  | NO | NO | NO |



|              |               |           |       |     |    |     |    |
|--------------|---------------|-----------|-------|-----|----|-----|----|
| SPAC7D4.04   | SPAC23H3.04   | 0.5081604 | Novel | NO  | NO | NO  | NO |
| SPAC23H3.04  | SPBC29B5.01   | 0.5081558 | Novel | NO  | NO | NO  | NO |
| SPAC23H3.04  | SPBC2D10.12   | 0.5081555 | Novel | NO  | NO | NO  | NO |
| SPAC23H3.04  | SPCC1739.03   | 0.508152  | Novel | NO  | NO | NO  | NO |
| SPAC23H3.04  | SPBC21H7.05   | 0.508152  | Novel | NO  | NO | NO  | NO |
| SPBC1718.06  | SPAC23H3.04   | 0.5081482 | Novel | YES | NO | NO  | NO |
| SPAC23H3.04  | SPAC25G10.03  | 0.5081442 | Novel | NO  | NO | NO  | NO |
| SPAC23H3.04  | SPBC20F10.04c | 0.5081426 | Novel | NO  | NO | NO  | NO |
| SPAC23H3.04  | SPAC19D5.01   | 0.5081399 | Novel | NO  | NO | NO  | NO |
| SPAC23H3.04  | SPBC1105.04c  | 0.5081392 | Novel | NO  | NO | NO  | NO |
| SPBC19C7.03  | SPAC23H3.04   | 0.5081371 | Novel | YES | NO | NO  | NO |
| SPAC23H3.04  | SPBC776.18c   | 0.5081316 | Novel | NO  | NO | NO  | NO |
| SPAC23H3.04  | SPCC191.09c   | 0.5081308 | Novel | NO  | NO | NO  | NO |
| SPAC23H3.04  | SPBC11C11.04c | 0.5081294 | Novel | NO  | NO | NO  | NO |
| SPAC4H3.05   | SPAC23H3.04   | 0.5081264 | Novel | NO  | NO | NO  | NO |
| SPAC23H3.04  | SPBC1289.07c  | 0.508125  | Novel | NO  | NO | NO  | NO |
| SPAC17H9.20  | SPAC23H3.04   | 0.5081243 | Novel | NO  | NO | NO  | NO |
| SPAC1783.05  | SPAC23H3.04   | 0.5081219 | Novel | NO  | NO | NO  | NO |
| SPBP23A10.13 | SPAC23H3.04   | 0.5081205 | Novel | NO  | NO | NO  | NO |
| SPAC23H3.04  | SPAC19A8.12   | 0.5081159 | Novel | NO  | NO | NO  | NO |
| SPBC649.03   | SPAC23H3.04   | 0.508115  | Novel | NO  | NO | NO  | NO |
| SPAC23H3.04  | SPAC6F6.06c   | 0.5081091 | Novel | YES | NO | NO  | NO |
| SPAC23H3.04  | SPBC725.16    | 0.5081051 | Novel | NO  | NO | NO  | NO |
| SPAC23H3.04  | SPAC328.03    | 0.5081032 | Novel | NO  | NO | NO  | NO |
| SPAC23H3.04  | SPAC458.07    | 0.5081028 | Novel | NO  | NO | NO  | NO |
| SPAC23H3.04  | SPBC557.03c   | 0.5080999 | Novel | NO  | NO | NO  | NO |
| SPAC23H3.04  | SPAC222.15    | 0.5080991 | Novel | NO  | NO | NO  | NO |
| SPAC23H3.04  | SPCC622.13c   | 0.508099  | Novel | NO  | NO | NO  | NO |
| SPAC23H3.04  | SPAC694.06c   | 0.5080955 | Novel | NO  | NO | NO  | NO |
| SPAC23H3.04  | SPAC16C9.06c  | 0.508092  | Novel | NO  | NO | NO  | NO |
| SPAC23H3.04  | SPBC29A3.07c  | 0.5080911 | Novel | NO  | NO | NO  | NO |
| SPAC23H3.04  | SPCC584.04    | 0.5080894 | Novel | NO  | NO | NO  | NO |
| SPAC23H3.04  | SPCC4B3.15    | 0.5080889 | Novel | NO  | NO | NO  | NO |
| SPAC167.03c  | SPAC23H3.04   | 0.5080881 | Novel | NO  | NO | NO  | NO |
| SPBC1A4.03c  | SPAC23H3.04   | 0.5080878 | Novel | NO  | NO | NO  | NO |
| SPAC23H3.04  | SPAC15F9.02   | 0.5080877 | Novel | NO  | NO | NO  | NO |
| SPAC4D7.05   | SPAC23H3.04   | 0.508081  | Novel | NO  | NO | NO  | NO |
| SPAC23H3.04  | SPAC15A10.15  | 0.5080806 | Novel | NO  | NO | NO  | NO |
| SPAC23H3.04  | SPCC1620.14c  | 0.5080773 | Novel | NO  | NO | NO  | NO |
| SPCC757.09c  | SPAC23H3.04   | 0.508077  | Novel | NO  | NO | NO  | NO |
| SPBC660.07   | SPAC23H3.04   | 0.5080755 | Novel | NO  | NO | NO  | NO |
| SPAC11E3.09  | SPAC23H3.04   | 0.5080723 | Novel | NO  | NO | NO  | NO |
| SPAC23H3.04  | SPAC3A11.05c  | 0.5080719 | Novel | NO  | NO | NO  | NO |
| SPAC23H3.04  | SPCC5E4.04    | 0.5080699 | Novel | NO  | NO | NO  | NO |
| SPAC23H3.04  | SPAC343.11c   | 0.5080696 | Novel | NO  | NO | NO  | NO |
| SPAC23H3.04  | SPBC3H7.06c   | 0.508069  | Novel | NO  | NO | YES | NO |
| SPAC23H3.04  | SPBC23G7.12c  | 0.508069  | Novel | NO  | NO | NO  | NO |

|              |               |           |       |     |    |     |    |
|--------------|---------------|-----------|-------|-----|----|-----|----|
| SPAC23H3.04  | SPAC1834.08   | 0.5080689 | Novel | NO  | NO | NO  | NO |
| SPAC23H3.04  | SPAC1F5.04c   | 0.5080689 | Novel | NO  | NO | NO  | NO |
| SPAC23H3.04  | SPAC29A4.10   | 0.5080686 | Novel | NO  | NO | NO  | NO |
| SPAC23H3.04  | SPBC12C2.10c  | 0.5080645 | Novel | NO  | NO | NO  | NO |
| SPCC74.06    | SPAC23H3.04   | 0.5080636 | Novel | YES | NO | NO  | NO |
| SPAC23H3.04  | SPBC29A10.05  | 0.5080575 | Novel | NO  | NO | NO  | NO |
| SPAC23H3.04  | SPAC3G6.01    | 0.5080514 | Novel | NO  | NO | NO  | NO |
| SPAC926.04c  | SPAC23H3.04   | 0.508051  | Novel | NO  | NO | NO  | NO |
| SPAC23H3.04  | SPBC146.07    | 0.5080501 | Novel | NO  | NO | NO  | NO |
| SPAC23H3.04  | SPBC8D2.09c   | 0.5080467 | Novel | NO  | NO | NO  | NO |
| SPAC23H3.04  | SPAC19A8.13   | 0.5080424 | Novel | NO  | NO | NO  | NO |
| SPAC890.02c  | SPAC23H3.04   | 0.50804   | Novel | NO  | NO | NO  | NO |
| SPAC23H3.04  | SPAC1687.20c  | 0.5080387 | Novel | NO  | NO | NO  | NO |
| SPAC23H3.04  | SPAC222.14c   | 0.5080372 | Novel | YES | NO | NO  | NO |
| SPAC23H3.04  | SPAC3H1.01c   | 0.5080366 | Novel | NO  | NO | NO  | NO |
| SPAC23H3.04  | SPCC4G3.05c   | 0.5080354 | Novel | NO  | NO | NO  | NO |
| SPBC36.12c   | SPAC23H3.04   | 0.5080348 | Novel | NO  | NO | NO  | NO |
| SPAC23H3.04  | SPCC1682.04   | 0.5080331 | Novel | NO  | NO | NO  | NO |
| SPBC21.05c   | SPAC23H3.04   | 0.5080325 | Novel | NO  | NO | NO  | NO |
| SPAC23H3.04  | SPAC144.17c   | 0.5080319 | Novel | NO  | NO | NO  | NO |
| SPAC13D6.05  | SPAC23H3.04   | 0.5080319 | Novel | NO  | NO | NO  | NO |
| SPAC23H3.04  | SPAC30D11.09  | 0.5080308 | Novel | NO  | NO | NO  | NO |
| SPAC23H3.04  | SPBC3B8.09    | 0.5080308 | Novel | NO  | NO | NO  | NO |
| SPAC23H3.04  | SPAC1093.06c  | 0.5080294 | Novel | NO  | NO | NO  | NO |
| SPBP4H10.06c | SPAC23H3.04   | 0.5080271 | Novel | NO  | NO | NO  | NO |
| SPAC23H3.04  | SPAC1952.05   | 0.5080254 | Novel | NO  | NO | NO  | NO |
| SPAC23H3.04  | SPAC16.02c    | 0.5080235 | Novel | NO  | NO | NO  | NO |
| SPAC23H3.04  | SPAC17A5.06   | 0.5080217 | Novel | NO  | NO | NO  | NO |
| SPAC23H3.04  | SPAPB1E7.02c  | 0.5080215 | Novel | NO  | NO | NO  | NO |
| SPAC23H3.04  | SPCC1682.10   | 0.5080206 | Novel | NO  | NO | NO  | NO |
| SPAC23H3.04  | SPAC1851.04c  | 0.5080204 | Novel | YES | NO | NO  | NO |
| SPAC23H3.04  | SPAC9.03c     | 0.508019  | Novel | NO  | NO | NO  | NO |
| SPAC23H3.04  | SPCC613.12c   | 0.5080173 | Novel | NO  | NO | NO  | NO |
| SPAC23H3.04  | SPAC688.10    | 0.5080143 | Novel | NO  | NO | NO  | NO |
| SPAC23H3.04  | SPAC22A12.15c | 0.5080143 | Novel | YES | NO | NO  | NO |
| SPBC3F6.05   | SPAC23H3.04   | 0.508009  | Novel | NO  | NO | NO  | NO |
| SPBC216.06c  | SPAC23H3.04   | 0.5080083 | Novel | NO  | NO | NO  | NO |
| SPBC1709.15c | SPAC23H3.04   | 0.5080075 | Novel | NO  | NO | NO  | NO |
| SPAC23H3.04  | SPBC31F10.04c | 0.5080075 | Novel | NO  | NO | NO  | NO |
| SPAC23H3.04  | SPBC947.11c   | 0.508006  | Novel | NO  | NO | NO  | NO |
| SPAC23H3.04  | SPBC36.09     | 0.5080054 | Novel | NO  | NO | NO  | NO |
| SPAC23H3.04  | SPBC28F2.06c  | 0.5080033 | Novel | YES | NO | NO  | NO |
| SPAC23H3.04  | SPAC1B1.01    | 0.5080025 | Novel | NO  | NO | NO  | NO |
| SPAC23H3.04  | SPAC22F3.13   | 0.508002  | Novel | NO  | NO | NO  | NO |
| SPBP19A11.06 | SPAC23H3.04   | 0.5080004 | Novel | NO  | NO | NO  | NO |
| SPBC336.04   | SPAC23H3.04   | 0.5079998 | Novel | NO  | NO | NO  | NO |
| SPAC23H3.04  | SPAC56F8.05c  | 0.5079993 | Novel | YES | NO | YES | NO |

|              |               |           |       |     |    |    |    |
|--------------|---------------|-----------|-------|-----|----|----|----|
| SPAC23H3.04  | SPAC26A3.16   | 0.5079973 | Novel | NO  | NO | NO | NO |
| SPAC23H3.04  | SPAC630.13c   | 0.5079964 | Novel | NO  | NO | NO | NO |
| SPAC23H3.04  | SPAC607.09c   | 0.5079932 | Novel | NO  | NO | NO | NO |
| SPAC24H6.05  | SPAC23H3.04   | 0.5079904 | Novel | NO  | NO | NO | NO |
| SPAC23H3.04  | SPBC1709.08   | 0.5079896 | Novel | NO  | NO | NO | NO |
| SPAC23H3.04  | SPCC645.07    | 0.5079893 | Novel | NO  | NO | NO | NO |
| SPAC23H3.04  | SPBC19C7.09c  | 0.5079877 | Novel | NO  | NO | NO | NO |
| SPAC23H3.04  | SPAC6F6.12    | 0.5079863 | Novel | YES | NO | NO | NO |
| SPAC110.02   | SPAC23H3.04   | 0.5079862 | Novel | NO  | NO | NO | NO |
| SPBC13G1.13  | SPAC23H3.04   | 0.5079858 | Novel | NO  | NO | NO | NO |
| SPAC11H11.06 | SPAC23H3.04   | 0.5079857 | Novel | NO  | NO | NO | NO |
| SPAC23H3.04  | SPBC660.13c   | 0.5079838 | Novel | NO  | NO | NO | NO |
| SPAC23H3.04  | SPBC26H8.10   | 0.5079837 | Novel | NO  | NO | NO | NO |
| SPBC336.09c  | SPAC23H3.04   | 0.5079813 | Novel | NO  | NO | NO | NO |
| SPAC23H3.04  | SPAC6F6.02c   | 0.5079799 | Novel | NO  | NO | NO | NO |
| SPAC23H3.04  | SPAC4H3.11c   | 0.5079745 | Novel | NO  | NO | NO | NO |
| SPAC23H3.04  | SPAC607.10    | 0.5079745 | Novel | NO  | NO | NO | NO |
| SPAC23H3.04  | SPAPB1A10.04c | 0.5079729 | Novel | NO  | NO | NO | NO |
| SPBC215.02   | SPAC23H3.04   | 0.5079713 | Novel | NO  | NO | NO | NO |
| SPAC23H3.04  | SPCPIE11.04c  | 0.50797   | Novel | NO  | NO | NO | NO |
| SPBC14F5.04c | SPAC23H3.04   | 0.507969  | Novel | NO  | NO | NO | NO |
| SPAC23H3.04  | SPAC1565.08   | 0.5079652 | Novel | NO  | NO | NO | NO |
| SPAC23H3.04  | SPCC1281.02c  | 0.5079636 | Novel | NO  | NO | NO | NO |
| SPAC23H3.04  | SPAC22F3.09c  | 0.5079633 | Novel | NO  | NO | NO | NO |
| SPAC23H3.04  | SPCC306.03c   | 0.5079623 | Novel | NO  | NO | NO | NO |
| SPAC23H3.04  | SPCC1739.13   | 0.5079618 | Novel | NO  | NO | NO | NO |
| SPBC839.10   | SPAC23H3.04   | 0.5079617 | Novel | NO  | NO | NO | NO |
| SPAC23H3.04  | SPCC188.13c   | 0.5079562 | Novel | NO  | NO | NO | NO |
| SPCC188.08c  | SPAC23H3.04   | 0.5079561 | Novel | NO  | NO | NO | NO |
| SPAC23H3.04  | SPAC4F8.12c   | 0.5079555 | Novel | NO  | NO | NO | NO |
| SPAC23H3.04  | SPBC336.12c   | 0.5079536 | Novel | NO  | NO | NO | NO |
| SPAC23H3.04  | SPCC364.02c   | 0.5079534 | Novel | NO  | NO | NO | NO |
| SPAC23H3.04  | SPCC1682.02c  | 0.5079521 | Novel | NO  | NO | NO | NO |
| SPAC18G6.11c | SPAC23H3.04   | 0.5079516 | Novel | NO  | NO | NO | NO |
| SPAC23H3.04  | SPBC20F10.06  | 0.5079494 | Novel | NO  | NO | NO | NO |
| SPAC23H3.04  | SPBC12C2.08   | 0.5079485 | Novel | NO  | NO | NO | NO |
| SPAPYUG7.02c | SPAC23H3.04   | 0.5079479 | Novel | NO  | NO | NO | NO |
| SPAC23H3.04  | SPAC688.08    | 0.5079473 | Novel | NO  | NO | NO | NO |
| SPAC24H6.09  | SPAC23H3.04   | 0.5079466 | Novel | NO  | NO | NO | NO |
| SPAC23H3.04  | SPAC25B8.14   | 0.5079462 | Novel | NO  | NO | NO | NO |
| SPAC23H3.04  | SPAC27F1.09c  | 0.5079453 | Novel | NO  | NO | NO | NO |
| SPAC23H3.04  | SPAC26A3.12c  | 0.5079448 | Novel | NO  | NO | NO | NO |
| SPAC23H3.04  | SPAC1B2.05    | 0.5079439 | Novel | NO  | NO | NO | NO |
| SPAC23H3.04  | SPAC2G11.12   | 0.5079439 | Novel | NO  | NO | NO | NO |
| SPAC23H3.04  | SPAC15A10.16  | 0.5079435 | Novel | NO  | NO | NO | NO |
| SPAC3A12.11c | SPAC23H3.04   | 0.50794   | Novel | NO  | NO | NO | NO |
| SPAC23H3.04  | SPAC1486.05   | 0.5079396 | Novel | NO  | NO | NO | NO |

|               |               |           |       |     |    |    |    |
|---------------|---------------|-----------|-------|-----|----|----|----|
| SPAC23H3.04   | SPBC16E9.17c  | 0.5079381 | Novel | NO  | NO | NO | NO |
| SPAC23H3.04   | SPBC16A3.11   | 0.5079351 | Novel | NO  | NO | NO | NO |
| SPBC336.03    | SPAC23H3.04   | 0.5079345 | Novel | NO  | NO | NO | NO |
| SPAC23H3.04   | SPBC16H5.05c  | 0.5079333 | Novel | NO  | NO | NO | NO |
| SPAC22E12.09c | SPAC23H3.04   | 0.5079299 | Novel | YES | NO | NO | NO |
| SPBC1718.03   | SPAC23H3.04   | 0.5079291 | Novel | NO  | NO | NO | NO |
| SPAC23H3.04   | SPCC1020.02   | 0.5079288 | Novel | NO  | NO | NO | NO |
| SPAC23H3.04   | SPBC106.20    | 0.5079285 | Novel | NO  | NO | NO | NO |
| SPAC23H3.04   | SPAC13G7.02c  | 0.507926  | Novel | NO  | NO | NO | NO |
| SPAC23H3.04   | SPAC25A8.01c  | 0.5079255 | Novel | NO  | NO | NO | NO |
| SPAC23H3.04   | SPBC29A10.14  | 0.5079253 | Novel | NO  | NO | NO | NO |
| SPBC409.09c   | SPAC23H3.04   | 0.5079249 | Novel | NO  | NO | NO | NO |
| SPCC576.10c   | SPAC23H3.04   | 0.5079226 | Novel | NO  | NO | NO | NO |
| SPAC23H3.04   | SPAC6B12.10c  | 0.5079225 | Novel | NO  | NO | NO | NO |
| SPAC4D7.13    | SPAC23H3.04   | 0.5079219 | Novel | NO  | NO | NO | NO |
| SPAC23H3.04   | SPBP16F5.03c  | 0.507921  | Novel | NO  | NO | NO | NO |
| SPAC23H3.04   | SPAC688.04c   | 0.5079178 | Novel | NO  | NO | NO | NO |
| SPBC1604.06c  | SPAC23H3.04   | 0.5079175 | Novel | YES | NO | NO | NO |
| SPAC23H3.04   | SPAP8A3.06    | 0.5079173 | Novel | NO  | NO | NO | NO |
| SPBC16C6.06   | SPAC23H3.04   | 0.5079165 | Novel | YES | NO | NO | NO |
| SPAC23H3.04   | SPAC17G6.17   | 0.5079147 | Novel | NO  | NO | NO | NO |
| SPBC3E7.08c   | SPAC23H3.04   | 0.5079133 | Novel | NO  | NO | NO | NO |
| SPAC23H3.04   | SPBC902.02c   | 0.5079131 | Novel | NO  | NO | NO | NO |
| SPAC23H3.04   | SPAC30C2.02   | 0.507912  | Novel | NO  | NO | NO | NO |
| SPBC409.04c   | SPAC23H3.04   | 0.5079105 | Novel | NO  | NO | NO | NO |
| SPAC23H3.04   | SPBC1709.01   | 0.5079103 | Novel | NO  | NO | NO | NO |
| SPBC17F3.01c  | SPAC23H3.04   | 0.5079078 | Novel | NO  | NO | NO | NO |
| SPAC23H3.04   | SPBC887.10    | 0.5079078 | Novel | NO  | NO | NO | NO |
| SPBC1685.15c  | SPAC23H3.04   | 0.5079075 | Novel | NO  | NO | NO | NO |
| SPAC23H3.04   | SPAC13F5.06c  | 0.5079074 | Novel | NO  | NO | NO | NO |
| SPAC3G9.14    | SPAC23H3.04   | 0.5079063 | Novel | NO  | NO | NO | NO |
| SPAC17C9.13c  | SPAC23H3.04   | 0.5079049 | Novel | NO  | NO | NO | NO |
| SPBC12C2.02c  | SPAC23H3.04   | 0.5079047 | Novel | YES | NO | NO | NO |
| SPAC23H3.04   | SPAC27F1.02c  | 0.5079041 | Novel | NO  | NO | NO | NO |
| SPAC6G10.07   | SPAC23H3.04   | 0.507902  | Novel | NO  | NO | NO | NO |
| SPCP25A2.02c  | SPAC23H3.04   | 0.5079008 | Novel | NO  | NO | NO | NO |
| SPAC23H3.04   | SPAC25G10.04c | 0.5078996 | Novel | NO  | NO | NO | NO |
| SPAC23H3.04   | SPBC713.02c   | 0.5078984 | Novel | NO  | NO | NO | NO |
| SPAC17C9.01c  | SPAC23H3.04   | 0.5078971 | Novel | NO  | NO | NO | NO |
| SPAC23H3.04   | SPAC19G12.10c | 0.5078969 | Novel | NO  | NO | NO | NO |
| SPAC23H3.04   | SPAC10F6.02c  | 0.5078966 | Novel | NO  | NO | NO | NO |
| SPAC23H3.04   | SPAPB1E7.06c  | 0.5078945 | Novel | NO  | NO | NO | NO |
| SPAC1687.18c  | SPAC23H3.04   | 0.5078939 | Novel | NO  | NO | NO | NO |
| SPBP8B7.12c   | SPAC23H3.04   | 0.5078934 | Novel | NO  | NO | NO | NO |
| SPAC23H3.04   | SPCC895.05    | 0.5078933 | Novel | NO  | NO | NO | NO |
| SPAC23H3.04   | SPBC14F5.08   | 0.5078891 | Novel | NO  | NO | NO | NO |
| SPAC23H3.04   | SPBP19A11.04c | 0.5078878 | Novel | NO  | NO | NO | NO |

|               |               |           |       |     |    |     |    |
|---------------|---------------|-----------|-------|-----|----|-----|----|
| SPAC23H3.04   | SPAC30D11.10  | 0.5078872 | Novel | NO  | NO | NO  | NO |
| SPBC14F5.03c  | SPAC23H3.04   | 0.5078871 | Novel | NO  | NO | NO  | NO |
| SPAC23H3.04   | SPCC285.16c   | 0.5078833 | Novel | NO  | NO | NO  | NO |
| SPAC23H3.04   | SPCC18.04     | 0.5078826 | Novel | NO  | NO | NO  | NO |
| SPAC23H3.04   | SPBC211.02c   | 0.5078808 | Novel | NO  | NO | NO  | NO |
| SPAC23H3.04   | SPBC146.09c   | 0.5078796 | Novel | NO  | NO | NO  | NO |
| SPAC23H3.04   | SPBC83.03c    | 0.5078795 | Novel | NO  | NO | NO  | NO |
| SPAC23H3.04   | SPBC4F6.12    | 0.5078759 | Novel | NO  | NO | NO  | NO |
| SPAC23H3.04   | SPAC20G8.03   | 0.5078733 | Novel | YES | NO | NO  | NO |
| SPAC23H3.04   | SPCC965.07c   | 0.507873  | Novel | NO  | NO | NO  | NO |
| SPAC23H3.04   | SPBC646.09c   | 0.5078714 | Novel | NO  | NO | NO  | NO |
| SPAC15A10.03c | SPAC23H3.04   | 0.5078712 | Novel | NO  | NO | NO  | NO |
| SPAC23H3.04   | SPBC15D4.03   | 0.507868  | Novel | NO  | NO | NO  | NO |
| SPAC23H3.04   | SPCC736.14    | 0.5078674 | Novel | NO  | NO | NO  | NO |
| SPAC23H3.04   | SPAC4F8.10c   | 0.5078671 | Novel | NO  | NO | NO  | NO |
| SPBC16G5.01   | SPAC23H3.04   | 0.507867  | Novel | NO  | NO | NO  | NO |
| SPAC23H3.04   | SPAC27E2.09   | 0.507864  | Novel | YES | NO | NO  | NO |
| SPAC23H3.04   | SPAC1006.03c  | 0.5078621 | Novel | NO  | NO | YES | NO |
| SPAC23H3.04   | SPAC30D11.08c | 0.5078596 | Novel | NO  | NO | NO  | NO |
| SPCC188.04c   | SPAC23H3.04   | 0.507858  | Novel | NO  | NO | NO  | NO |
| SPAC23H3.04   | SPCC11E10.08  | 0.5078574 | Novel | NO  | NO | NO  | NO |
| SPAC23E2.01   | SPAC23H3.04   | 0.5078571 | Novel | NO  | NO | NO  | NO |
| SPAC23H3.04   | SPAC23H4.12   | 0.5078569 | Novel | NO  | NO | NO  | NO |
| SPAPB1A10.09  | SPAC23H3.04   | 0.5078568 | Novel | NO  | NO | NO  | NO |
| SPAC9.13c     | SPAC23H3.04   | 0.5078552 | Novel | NO  | NO | NO  | NO |
| SPCC1753.03c  | SPAC23H3.04   | 0.5078545 | Novel | NO  | NO | NO  | NO |
| SPAC23H3.04   | SPAC1F5.11c   | 0.5078527 | Novel | NO  | NO | NO  | NO |
| SPAC17G8.05   | SPAC23H3.04   | 0.507852  | Novel | NO  | NO | NO  | NO |
| SPAC23H3.04   | SPBC4.04c     | 0.5078492 | Novel | NO  | NO | NO  | NO |
| SPAC23H3.04   | SPAC1834.07   | 0.5078477 | Novel | NO  | NO | NO  | NO |
| SPAC23H3.04   | SPAC17A2.01   | 0.5078467 | Novel | YES | NO | NO  | NO |
| SPBC9B6.04c   | SPAC23H3.04   | 0.5078465 | Novel | NO  | NO | NO  | NO |
| SPBC582.07c   | SPAC23H3.04   | 0.5078454 | Novel | NO  | NO | NO  | NO |
| SPAC23H3.04   | SPBC14C8.06   | 0.5078379 | Novel | NO  | NO | NO  | NO |
| SPAC23H3.04   | SPAC17G8.10c  | 0.5078358 | Novel | NO  | NO | NO  | NO |
| SPAC23H3.04   | SPCC1620.09c  | 0.5078358 | Novel | NO  | NO | NO  | NO |
| SPAC23H3.04   | SPBC11C11.08  | 0.5078358 | Novel | NO  | NO | NO  | NO |
| SPAC23H3.04   | SPAC1805.04   | 0.5078335 | Novel | NO  | NO | NO  | NO |
| SPAC23H3.04   | SPBC1734.11   | 0.507832  | Novel | NO  | NO | NO  | NO |
| SPAC23H3.04   | SPBC1778.04   | 0.5078301 | Novel | NO  | NO | NO  | NO |
| SPAC23H3.04   | SPBC1778.06c  | 0.5078289 | Novel | NO  | NO | NO  | NO |
| SPAC23H3.04   | SPCC188.03    | 0.5078289 | Novel | NO  | NO | NO  | NO |
| SPAC22H10.07  | SPAC23H3.04   | 0.5078264 | Novel | NO  | NO | NO  | NO |
| SPCC1235.06   | SPAC23H3.04   | 0.5078264 | Novel | YES | NO | NO  | NO |
| SPAC23G3.01   | SPAC23H3.04   | 0.5078261 | Novel | NO  | NO | NO  | NO |
| SPAC23H3.04   | SPBC31F10.14c | 0.5078259 | Novel | NO  | NO | NO  | NO |
| SPAC23H3.04   | SPBC16A3.18   | 0.5078239 | Novel | NO  | NO | NO  | NO |

|               |               |           |       |     |     |    |     |
|---------------|---------------|-----------|-------|-----|-----|----|-----|
| SPBC649.05    | SPAC23H3.04   | 0.5078238 | Novel | NO  | NO  | NO | NO  |
| SPCC645.06c   | SPAC23H3.04   | 0.5078216 | Novel | NO  | NO  | NO | NO  |
| SPAC23H3.04   | SPBP35G2.03c  | 0.5078209 | Novel | NO  | NO  | NO | NO  |
| SPAC23H3.04   | SPAPJ698.02c  | 0.5078191 | Novel | NO  | NO  | NO | NO  |
| SPAC23H3.04   | SPBC25H2.13c  | 0.5078187 | Novel | NO  | NO  | NO | NO  |
| SPBPB8B6.04c  | SPAC23H3.04   | 0.5078186 | Novel | NO  | NO  | NO | NO  |
| SPAC15A10.03c | SPBC19F8.07   | 0.5078183 | Novel | NO  | YES | NO | YES |
| SPCC970.07c   | SPAC23H3.04   | 0.5078159 | Novel | NO  | NO  | NO | NO  |
| SPAC23H3.04   | SPAC1296.03c  | 0.5078114 | Novel | NO  | NO  | NO | NO  |
| SPAC13G6.12c  | SPAC23H3.04   | 0.507811  | Novel | NO  | NO  | NO | NO  |
| SPAC23H3.04   | SPAC26H5.05   | 0.5078108 | Novel | YES | NO  | NO | NO  |
| SPAC22H10.12c | SPAC23H3.04   | 0.5078101 | Novel | NO  | NO  | NO | NO  |
| SPBC4C3.05c   | SPAC23H3.04   | 0.5078095 | Novel | NO  | NO  | NO | NO  |
| SPAC23H3.04   | SPBC3B8.02    | 0.5078094 | Novel | NO  | NO  | NO | NO  |
| SPAC23H3.04   | SPCPIE11.06   | 0.5078085 | Novel | YES | NO  | NO | NO  |
| SPBC32C12.02  | SPAC23H3.04   | 0.5078084 | Novel | NO  | NO  | NO | NO  |
| SPAC13G6.01c  | SPAC23H3.04   | 0.5078084 | Novel | NO  | NO  | NO | NO  |
| SPAC23H3.04   | SPBC646.13    | 0.507808  | Novel | NO  | NO  | NO | NO  |
| SPAC23H3.04   | SPAP8A3.08    | 0.5078052 | Novel | NO  | NO  | NO | NO  |
| SPAC23H3.04   | SPAC30.03c    | 0.5078043 | Novel | NO  | NO  | NO | NO  |
| SPAC23H3.04   | SPBC1778.02   | 0.5078037 | Novel | NO  | NO  | NO | NO  |
| SPAC23H3.04   | SPBC685.06    | 0.5078017 | Novel | NO  | NO  | NO | NO  |
| SPAC23H3.04   | SPCC736.09c   | 0.5078006 | Novel | NO  | NO  | NO | NO  |
| SPAC23H3.04   | SPAC1952.13   | 0.5078001 | Novel | NO  | NO  | NO | NO  |
| SPBC3B9.16c   | SPAC23H3.04   | 0.5077994 | Novel | NO  | NO  | NO | NO  |
| SPAC23H3.04   | SPCC1682.07   | 0.5077968 | Novel | NO  | NO  | NO | NO  |
| SPAC23H3.04   | SPAC25G10.08  | 0.5077967 | Novel | NO  | NO  | NO | NO  |
| SPBC19G7.01c  | SPAC23H3.04   | 0.5077944 | Novel | NO  | NO  | NO | NO  |
| SPAC19G12.14  | SPAC23H3.04   | 0.507793  | Novel | YES | NO  | NO | NO  |
| SPAC23H3.04   | SPBC106.09    | 0.5077925 | Novel | NO  | NO  | NO | NO  |
| SPAC23H3.04   | SPAC8E11.07c  | 0.507791  | Novel | NO  | NO  | NO | NO  |
| SPBC17G9.04c  | SPAC23H3.04   | 0.5077903 | Novel | NO  | NO  | NO | NO  |
| SPAC23H3.04   | SPBC776.13    | 0.5077903 | Novel | NO  | NO  | NO | NO  |
| SPCC1840.03   | SPAC23H3.04   | 0.5077901 | Novel | NO  | NO  | NO | NO  |
| SPAC23G3.11   | SPAC23H3.04   | 0.5077894 | Novel | NO  | NO  | NO | NO  |
| SPAC23H3.04   | SPAPJ696.01c  | 0.5077894 | Novel | NO  | NO  | NO | NO  |
| SPAC23H3.04   | SPAC31A2.15c  | 0.5077883 | Novel | NO  | NO  | NO | NO  |
| SPBC12D12.01  | SPAC23H3.04   | 0.5077883 | Novel | NO  | NO  | NO | NO  |
| SPAC23H3.04   | SPBC11C11.02  | 0.5077883 | Novel | NO  | NO  | NO | NO  |
| SPAC23H3.04   | SPCC1827.05c  | 0.5077879 | Novel | NO  | NO  | NO | NO  |
| SPAC23H3.04   | SPAC1006.06   | 0.5077877 | Novel | NO  | NO  | NO | NO  |
| SPAC23H3.04   | SPBC211.04c   | 0.5077875 | Novel | NO  | NO  | NO | NO  |
| SPAC23H3.04   | SPBC1734.06   | 0.5077872 | Novel | NO  | NO  | NO | NO  |
| SPAC23H3.04   | SPAC589.02c   | 0.5077869 | Novel | NO  | NO  | NO | NO  |
| SPAC23H3.04   | SPAC22A12.09c | 0.5077858 | Novel | NO  | NO  | NO | NO  |
| SPAC23H3.04   | SPAC2G11.14   | 0.507782  | Novel | NO  | NO  | NO | NO  |
| SPAC23E2.02   | SPAC23H3.04   | 0.5077817 | Novel | NO  | NO  | NO | NO  |

|              |               |           |       |     |    |    |    |
|--------------|---------------|-----------|-------|-----|----|----|----|
| SPAC23H3.04  | SPCC4G3.07c   | 0.5077801 | Novel | NO  | NO | NO | NO |
| SPBC12D12.03 | SPAC23H3.04   | 0.5077795 | Novel | NO  | NO | NO | NO |
| SPCPJ732.01  | SPAC23H3.04   | 0.5077789 | Novel | YES | NO | NO | NO |
| SPAC14C4.05c | SPAC23H3.04   | 0.5077775 | Novel | YES | NO | NO | NO |
| SPAC23H3.04  | SPAC11E3.08c  | 0.5077772 | Novel | NO  | NO | NO | NO |
| SPAC23H3.04  | SPAC3C7.11c   | 0.5077772 | Novel | YES | NO | NO | NO |
| SPAC23H3.04  | SPAC56E4.04c  | 0.5077769 | Novel | NO  | NO | NO | NO |
| SPAC23H3.04  | SPBP22H7.09c  | 0.5077765 | Novel | NO  | NO | NO | NO |
| SPCC777.13   | SPAC23H3.04   | 0.5077744 | Novel | NO  | NO | NO | NO |
| SPAC23H3.04  | SPCC1393.10   | 0.5077723 | Novel | YES | NO | NO | NO |
| SPAC23H3.04  | SPAPJ698.03c  | 0.507772  | Novel | NO  | NO | NO | NO |
| SPAC23H3.04  | SPAC20G8.05c  | 0.5077717 | Novel | NO  | NO | NO | NO |
| SPAC23H3.04  | SPAC1834.06c  | 0.5077708 | Novel | NO  | NO | NO | NO |
| SPBC3B9.15c  | SPAC23H3.04   | 0.5077676 | Novel | NO  | NO | NO | NO |
| SPAC23H3.04  | SPBC21.01     | 0.5077669 | Novel | NO  | NO | NO | NO |
| SPAC23H3.04  | SPCC1919.15   | 0.5077643 | Novel | NO  | NO | NO | NO |
| SPAC1002.06c | SPAC23H3.04   | 0.5077642 | Novel | NO  | NO | NO | NO |
| SPBC336.01   | SPAC23H3.04   | 0.5077615 | Novel | NO  | NO | NO | NO |
| SPAC23H3.04  | SPBC3D6.10    | 0.5077588 | Novel | NO  | NO | NO | NO |
| SPAC23H3.04  | SPAC22H12.02  | 0.5077585 | Novel | NO  | NO | NO | NO |
| SPAC23H3.04  | SPAC25H1.02   | 0.5077578 | Novel | NO  | NO | NO | NO |
| SPAC23H3.04  | SPBC2D10.17   | 0.5077565 | Novel | NO  | NO | NO | NO |
| SPAC23H3.04  | SPAC23C11.12  | 0.5077563 | Novel | NO  | NO | NO | NO |
| SPAC17D4.02  | SPAC23H3.04   | 0.507752  | Novel | NO  | NO | NO | NO |
| SPAC23H3.04  | SPCC1223.04c  | 0.5077513 | Novel | NO  | NO | NO | NO |
| SPCC1672.06c | SPAC23H3.04   | 0.5077464 | Novel | NO  | NO | NO | NO |
| SPAC23H3.04  | SPCC622.16c   | 0.5077455 | Novel | NO  | NO | NO | NO |
| SPAC23H3.04  | SPAC1786.03   | 0.5077448 | Novel | NO  | NO | NO | NO |
| SPBC800.03   | SPAC23H3.04   | 0.5077442 | Novel | NO  | NO | NO | NO |
| SPAC23H3.04  | SPAC8C9.03    | 0.5077437 | Novel | NO  | NO | NO | NO |
| SPAC23H3.04  | SPAC821.07c   | 0.5077437 | Novel | NO  | NO | NO | NO |
| SPBP23A10.07 | SPAC23H3.04   | 0.5077419 | Novel | NO  | NO | NO | NO |
| SPAC23H3.04  | SPCC417.02    | 0.5077413 | Novel | NO  | NO | NO | NO |
| SPAC23H3.04  | SPBC17D11.07c | 0.5077404 | Novel | NO  | NO | NO | NO |
| SPAC23H3.04  | SPAC23A1.10   | 0.5077402 | Novel | NO  | NO | NO | NO |
| SPAC23H3.04  | SPCC794.09c   | 0.5077402 | Novel | NO  | NO | NO | NO |
| SPAC23H3.04  | SPBC839.15c   | 0.5077402 | Novel | NO  | NO | NO | NO |
| SPAC23H3.04  | SPAC3H1.12c   | 0.5077392 | Novel | NO  | NO | NO | NO |
| SPAC23H3.04  | SPBP18G5.03   | 0.5077387 | Novel | NO  | NO | NO | NO |
| SPAC23H3.04  | SPAC22F8.11   | 0.5077375 | Novel | NO  | NO | NO | NO |
| SPAC23H3.04  | SPAC6F12.09   | 0.5077372 | Novel | NO  | NO | NO | NO |
| SPAC23H3.04  | SPCC1795.09   | 0.5077362 | Novel | YES | NO | NO | NO |
| SPAC23H3.04  | SPAC8F11.03   | 0.5077354 | Novel | NO  | NO | NO | NO |
| SPAC23H3.04  | SPBP16F5.07   | 0.5077341 | Novel | YES | NO | NO | NO |
| SPAC3A11.12c | SPAC23H3.04   | 0.5077334 | Novel | NO  | NO | NO | NO |
| SPAC23H3.04  | SPAC6F12.11c  | 0.5077291 | Novel | NO  | NO | NO | NO |
| SPCC330.10   | SPAC23H3.04   | 0.5077289 | Novel | NO  | NO | NO | NO |

|               |              |           |       |     |    |     |    |
|---------------|--------------|-----------|-------|-----|----|-----|----|
| SPAC23H3.04   | SPBC2D10.06  | 0.5077263 | Novel | NO  | NO | NO  | NO |
| SPAC23H3.04   | SPBC19F5.01c | 0.5077261 | Novel | NO  | NO | NO  | NO |
| SPAC23H3.04   | SPAC6F12.15c | 0.5077237 | Novel | NO  | NO | NO  | NO |
| SPAC23H3.04   | SPAC29A4.08c | 0.5077236 | Novel | NO  | NO | NO  | NO |
| SPAC2F7.04    | SPAC23H3.04  | 0.5077235 | Novel | NO  | NO | NO  | NO |
| SPAC23H3.04   | SPBC21D10.12 | 0.5077231 | Novel | NO  | NO | NO  | NO |
| SPAC23H3.04   | SPAC222.09   | 0.507721  | Novel | NO  | NO | NO  | NO |
| SPAC23H3.04   | SPAC4F8.15   | 0.5077204 | Novel | YES | NO | NO  | NO |
| SPAC23H3.04   | SPAC1A6.04c  | 0.507719  | Novel | NO  | NO | NO  | NO |
| SPAC23H3.04   | SPBC2F12.13  | 0.5077184 | Novel | NO  | NO | NO  | NO |
| SPAC23H3.04   | SPAC29A4.07  | 0.5077178 | Novel | NO  | NO | NO  | NO |
| SPAC23H3.04   | SPBC25H2.12c | 0.5077174 | Novel | NO  | NO | NO  | NO |
| SPAC23H3.04   | SPCC338.17c  | 0.5077127 | Novel | NO  | NO | NO  | NO |
| SPAC19G12.03  | SPAC23H3.04  | 0.5077106 | Novel | NO  | NO | NO  | NO |
| SPAC23H3.04   | SPBC725.17c  | 0.5077101 | Novel | NO  | NO | NO  | NO |
| SPAC23H3.04   | SPCC1795.01c | 0.5077089 | Novel | NO  | NO | NO  | NO |
| SPCC613.04c   | SPAC23H3.04  | 0.5077049 | Novel | NO  | NO | NO  | NO |
| SPAC19G12.02c | SPAC23H3.04  | 0.5077015 | Novel | NO  | NO | NO  | NO |
| SPAC23H3.04   | SPAC22F3.03c | 0.5077001 | Novel | NO  | NO | NO  | NO |
| SPAC23H3.04   | SPAC19E9.01c | 0.5077001 | Novel | NO  | NO | NO  | NO |
| SPAC27D7.03c  | SPAC23H3.04  | 0.5076995 | Novel | NO  | NO | NO  | NO |
| SPAC23H3.04   | SPBC1703.06  | 0.5076995 | Novel | NO  | NO | YES | NO |
| SPAC23H3.04   | SPAC2C4.15c  | 0.5076968 | Novel | NO  | NO | NO  | NO |
| SPAC343.05    | SPAC23H3.04  | 0.5076965 | Novel | NO  | NO | NO  | NO |
| SPAC23H3.04   | SPBC1289.02c | 0.5076943 | Novel | NO  | NO | NO  | NO |
| SPAC3G9.09c   | SPAC23H3.04  | 0.5076915 | Novel | NO  | NO | NO  | NO |
| SPAC23H3.04   | SPAPB2B4.03  | 0.5076911 | Novel | NO  | NO | NO  | NO |
| SPCC16C4.09   | SPAC23H3.04  | 0.5076908 | Novel | NO  | NO | NO  | NO |
| SPAC23H3.04   | SPBP35G2.06c | 0.5076907 | Novel | NO  | NO | NO  | NO |
| SPAC19G12.12  | SPAC23H3.04  | 0.5076906 | Novel | NO  | NO | NO  | NO |
| SPAC23H3.04   | SPAC688.13   | 0.5076894 | Novel | NO  | NO | NO  | NO |
| SPAC24H6.12c  | SPAC23H3.04  | 0.5076875 | Novel | NO  | NO | NO  | NO |
| SPAC23H3.04   | SPCC16A11.14 | 0.5076871 | Novel | NO  | NO | NO  | NO |
| SPBC215.12    | SPAC23H3.04  | 0.5076856 | Novel | NO  | NO | NO  | NO |
| SPBC6B1.09c   | SPAC23H3.04  | 0.5076838 | Novel | NO  | NO | NO  | NO |
| SPAC4F10.10c  | SPAC23H3.04  | 0.5076786 | Novel | YES | NO | NO  | NO |
| SPAC23H3.04   | SPBC646.12c  | 0.5076785 | Novel | NO  | NO | NO  | NO |
| SPAC23H3.04   | SPBC24C6.06  | 0.5076781 | Novel | NO  | NO | NO  | NO |
| SPAC19G12.01c | SPAC23H3.04  | 0.5076759 | Novel | NO  | NO | NO  | NO |
| SPCC1235.07   | SPAC23H3.04  | 0.507675  | Novel | NO  | NO | NO  | NO |
| SPAC24H6.04   | SPAC23H3.04  | 0.5076745 | Novel | NO  | NO | NO  | NO |
| SPAC23H3.04   | SPAC6F6.17   | 0.5076745 | Novel | NO  | NO | NO  | NO |
| SPAC23H3.04   | SPAC3F10.02c | 0.5076697 | Novel | YES | NO | NO  | NO |
| SPAC23H3.04   | SPAC4F8.07c  | 0.5076681 | Novel | NO  | NO | NO  | NO |
| SPAC23H3.04   | SPCC1442.10c | 0.5076667 | Novel | NO  | NO | NO  | NO |
| SPAC23H3.04   | SPBC1734.02c | 0.5076656 | Novel | NO  | NO | NO  | NO |
| SPCC18B5.06   | SPAC23H3.04  | 0.5076638 | Novel | NO  | NO | NO  | NO |



|              |               |           |       |     |    |     |    |
|--------------|---------------|-----------|-------|-----|----|-----|----|
| SPAC23E2.03c | SPAC23H3.04   | 0.5076635 | Novel | NO  | NO | NO  | NO |
| SPAC23H3.04  | SPAC4G9.08c   | 0.5076607 | Novel | NO  | NO | NO  | NO |
| SPAC23H3.04  | SPCC16A11.17  | 0.5076601 | Novel | NO  | NO | NO  | NO |
| SPBC4.05     | SPAC23H3.04   | 0.5076553 | Novel | NO  | NO | NO  | NO |
| SPAC12G12.15 | SPAC23H3.04   | 0.5076512 | Novel | YES | NO | NO  | NO |
| SPBC1685.01  | SPAC23H3.04   | 0.5076471 | Novel | NO  | NO | NO  | NO |
| SPAC23H3.04  | SPAC18G6.07c  | 0.5076471 | Novel | NO  | NO | NO  | NO |
| SPAC23H3.04  | SPBC530.04    | 0.5076467 | Novel | NO  | NO | NO  | NO |
| SPAC23H3.04  | SPBC1709.14   | 0.5076433 | Novel | NO  | NO | NO  | NO |
| SPAC23H3.04  | SPBC28F2.10c  | 0.5076422 | Novel | NO  | NO | NO  | NO |
| SPAC23H3.04  | SPBC28F2.04c  | 0.5076404 | Novel | NO  | NO | NO  | NO |
| SPAC343.10   | SPAC23H3.04   | 0.5076403 | Novel | NO  | NO | NO  | NO |
| SPBC336.15   | SPAC23H3.04   | 0.507639  | Novel | NO  | NO | NO  | NO |
| SPBC3B9.02c  | SPAC23H3.04   | 0.5076359 | Novel | NO  | NO | NO  | NO |
| SPAC23H3.04  | SPBC19C2.01   | 0.5076356 | Novel | NO  | NO | NO  | NO |
| SPAC23H3.04  | SPBC36.06c    | 0.5076335 | Novel | NO  | NO | NO  | NO |
| SPAC23H3.04  | SPCC16A11.13  | 0.5076333 | Novel | NO  | NO | NO  | NO |
| SPAC23H3.04  | SPAC23D3.08   | 0.5076317 | Novel | NO  | NO | NO  | NO |
| SPAC23H3.04  | SPCC962.04    | 0.5076285 | Novel | NO  | NO | NO  | NO |
| SPAC23H3.04  | SPCC962.03c   | 0.5076282 | Novel | NO  | NO | NO  | NO |
| SPAC23H3.04  | SPBC2G2.01c   | 0.5076255 | Novel | YES | NO | NO  | NO |
| SPAC23H3.04  | SPBC119.01    | 0.5076251 | Novel | NO  | NO | NO  | NO |
| SPAC23H3.04  | SPBC1604.20c  | 0.5076244 | Novel | NO  | NO | NO  | NO |
| SPAC23H3.04  | SPCC4G3.19    | 0.507624  | Novel | NO  | NO | NO  | NO |
| SPAC23H3.04  | SPBC3D6.02    | 0.5076236 | Novel | NO  | NO | YES | NO |
| SPAC23H3.04  | SPAC8C9.14    | 0.5076234 | Novel | NO  | NO | NO  | NO |
| SPAC23H3.04  | SPBC14C8.14c  | 0.5076183 | Novel | NO  | NO | NO  | NO |
| SPAC23H3.04  | SPAC19G12.15c | 0.5076161 | Novel | NO  | NO | NO  | NO |
| SPAC23H3.04  | SPBC4.07c     | 0.5076158 | Novel | NO  | NO | NO  | NO |
| SPAC23H3.04  | SPCC16C4.18c  | 0.5076144 | Novel | NO  | NO | NO  | NO |
| SPAC23H3.04  | SPCC188.11    | 0.5076125 | Novel | NO  | NO | NO  | NO |
| SPAC23H3.04  | SPAC22G7.10   | 0.5076088 | Novel | NO  | NO | NO  | NO |
| SPAC23H3.04  | SPCC4F11.02   | 0.5076083 | Novel | NO  | NO | NO  | NO |
| SPAC23H3.04  | SPAC767.01c   | 0.5076031 | Novel | YES | NO | NO  | NO |
| SPAC3A11.12c | SPAC17H9.09c  | 0.5076014 | Novel | NO  | NO | NO  | NO |
| SPAC343.09   | SPAC23H3.04   | 0.5076001 | Novel | NO  | NO | NO  | NO |
| SPAC23H3.04  | SPAC1142.03c  | 0.5075986 | Novel | NO  | NO | NO  | NO |
| SPAC23H3.04  | SPBC1861.02   | 0.5075978 | Novel | NO  | NO | NO  | NO |
| SPAC23H3.04  | SPAC23D3.04c  | 0.5075976 | Novel | NO  | NO | NO  | NO |
| SPAC23H3.04  | SPBC1706.01   | 0.5075912 | Novel | NO  | NO | NO  | NO |
| SPAC23H3.04  | SPCC550.02c   | 0.5075874 | Novel | NO  | NO | NO  | NO |
| SPBC16C6.10  | SPAC23H3.04   | 0.5075867 | Novel | NO  | NO | NO  | NO |
| SPAC23H3.04  | SPAC16E8.11c  | 0.5075865 | Novel | NO  | NO | NO  | NO |
| SPAC3G9.10c  | SPAC23H3.04   | 0.5075832 | Novel | NO  | NO | NO  | NO |
| SPAC4A8.09c  | SPAC23H3.04   | 0.5075825 | Novel | NO  | NO | NO  | NO |
| SPBC16G5.12c | SPAC23H3.04   | 0.5075815 | Novel | NO  | NO | NO  | NO |
| SPAC23H3.04  | SPBC800.07c   | 0.50758   | Novel | NO  | NO | NO  | NO |

|              |               |           |       |     |    |     |     |
|--------------|---------------|-----------|-------|-----|----|-----|-----|
| SPBP23A10.04 | SPAC23H3.04   | 0.5075799 | Novel | NO  | NO | NO  | NO  |
| SPAC23H3.04  | SPBC646.05c   | 0.5075778 | Novel | YES | NO | NO  | NO  |
| SPAC23H3.04  | SPBC119.13c   | 0.5075764 | Novel | NO  | NO | NO  | NO  |
| SPAC23C11.12 | SPBC19F8.07   | 0.5075742 | Novel | NO  | NO | NO  | YES |
| SPBC2F12.08c | SPAC23H3.04   | 0.5075718 | Novel | NO  | NO | NO  | NO  |
| SPAC23H3.04  | SPCC417.05c   | 0.5075717 | Novel | NO  | NO | NO  | NO  |
| SPAC23H3.04  | SPBC428.03c   | 0.5075703 | Novel | YES | NO | YES | NO  |
| SPAC23H3.04  | SPCC16C4.14c  | 0.5075685 | Novel | NO  | NO | NO  | NO  |
| SPAC24H6.06  | SPAC23H3.04   | 0.5075685 | Novel | NO  | NO | NO  | NO  |
| SPBC4B4.09   | SPAC23H3.04   | 0.5075684 | Novel | NO  | NO | NO  | NO  |
| SPAC23H3.04  | SPBC8D2.10c   | 0.5075652 | Novel | NO  | NO | NO  | NO  |
| SPAC23H3.04  | SPAC1F5.08c   | 0.507565  | Novel | YES | NO | NO  | NO  |
| SPAC23H3.04  | SPAC12B10.12c | 0.507564  | Novel | NO  | NO | NO  | NO  |
| SPAC23H3.04  | SPCC290.04    | 0.507564  | Novel | NO  | NO | NO  | NO  |
| SPAC23H3.04  | SPBC17A3.07   | 0.5075633 | Novel | NO  | NO | NO  | NO  |
| SPAC56F8.10  | SPAC23H3.04   | 0.5075598 | Novel | NO  | NO | NO  | NO  |
| SPAC23H3.04  | SPCC1020.04c  | 0.5075598 | Novel | NO  | NO | NO  | NO  |
| SPAC23H3.04  | SPBC16H5.11c  | 0.5075581 | Novel | NO  | NO | NO  | NO  |
| SPBC32F12.11 | SPAC23H3.04   | 0.5075569 | Novel | NO  | NO | NO  | NO  |
| SPAC23H3.04  | SPCC645.14c   | 0.5075566 | Novel | NO  | NO | NO  | NO  |
| SPAC6B12.08  | SPAC23H3.04   | 0.5075536 | Novel | NO  | NO | NO  | NO  |
| SPAC23H3.04  | SPAC3A12.18   | 0.5075496 | Novel | NO  | NO | NO  | NO  |
| SPAC23H3.04  | SPBC119.14    | 0.5075475 | Novel | NO  | NO | NO  | NO  |
| SPAC23H3.04  | SPBC428.18    | 0.507547  | Novel | NO  | NO | NO  | NO  |
| SPAC23H3.04  | SPAC3G6.06c   | 0.5075454 | Novel | NO  | NO | NO  | NO  |
| SPAC23H3.04  | SPCC777.08c   | 0.5075442 | Novel | NO  | NO | NO  | NO  |
| SPAC23H3.04  | SPAC19B12.05c | 0.5075433 | Novel | NO  | NO | NO  | NO  |
| SPAC23H3.04  | SPBC56F2.01   | 0.5075407 | Novel | NO  | NO | NO  | NO  |
| SPBC3B9.07c  | SPAC23H3.04   | 0.5075402 | Novel | NO  | NO | NO  | NO  |
| SPAC23H3.04  | SPAC17H9.17c  | 0.5075392 | Novel | YES | NO | NO  | NO  |
| SPAC23H3.04  | SPAC22F8.10c  | 0.5075345 | Novel | NO  | NO | NO  | NO  |
| SPAC23H3.04  | SPAC17C9.10   | 0.5075338 | Novel | YES | NO | NO  | NO  |
| SPAC23H3.04  | SPAC29E6.08   | 0.5075331 | Novel | NO  | NO | NO  | NO  |
| SPAC23H3.04  | SPAC3F10.04   | 0.5075312 | Novel | NO  | NO | NO  | NO  |
| SPAC27D7.05c | SPAC23H3.04   | 0.5075305 | Novel | NO  | NO | NO  | NO  |
| SPAC23H3.04  | SPBC21H7.03c  | 0.5075299 | Novel | NO  | NO | YES | NO  |
| SPAC23H3.04  | SPAC1F7.03    | 0.5075275 | Novel | YES | NO | NO  | NO  |
| SPAC23H3.04  | SPBC651.10    | 0.5075274 | Novel | NO  | NO | NO  | NO  |
| SPBC582.03   | SPAC23H3.04   | 0.5075272 | Novel | NO  | NO | NO  | NO  |
| SPBC4F6.15c  | SPAC23H3.04   | 0.5075267 | Novel | NO  | NO | NO  | NO  |
| SPAC23H3.04  | SPBC409.05    | 0.5075258 | Novel | NO  | NO | NO  | NO  |
| SPAC23H3.04  | SPBP4H10.11c  | 0.5075251 | Novel | YES | NO | NO  | NO  |
| SPBC23G7.04c | SPAC23H3.04   | 0.5075213 | Novel | NO  | NO | NO  | NO  |
| SPBC365.05c  | SPAC23H3.04   | 0.5075207 | Novel | NO  | NO | NO  | NO  |
| SPAC23H3.04  | SPCC550.13    | 0.5075194 | Novel | NO  | NO | NO  | NO  |
| SPAC23H3.04  | SPAC3C7.03c   | 0.5075168 | Novel | NO  | NO | NO  | NO  |
| SPAC4F10.13c | SPAC23H3.04   | 0.5075148 | Novel | NO  | NO | NO  | NO  |

|               |               |           |       |     |    |     |    |
|---------------|---------------|-----------|-------|-----|----|-----|----|
| SPBC1198.13c  | SPAC23H3.04   | 0.5075145 | Novel | NO  | NO | NO  | NO |
| SPAC23H3.04   | SPAP27G11.15  | 0.5075101 | Novel | NO  | NO | NO  | NO |
| SPCC4G3.10c   | SPAC23H3.04   | 0.5075074 | Novel | NO  | NO | NO  | NO |
| SPAC23H3.04   | SPBP19A11.03c | 0.5075072 | Novel | NO  | NO | NO  | NO |
| SPAC23H3.04   | SPAC1805.07c  | 0.5075025 | Novel | NO  | NO | NO  | NO |
| SPAC23H3.04   | SPAC1783.07c  | 0.5075019 | Novel | NO  | NO | NO  | NO |
| SPAC23H3.04   | SPAC17G8.13c  | 0.5075012 | Novel | NO  | NO | NO  | NO |
| SPAC23H3.04   | SPBC646.14c   | 0.5074969 | Novel | NO  | NO | NO  | NO |
| SPBP23A10.09  | SPAC23H3.04   | 0.5074953 | Novel | NO  | NO | NO  | NO |
| SPBC1773.07c  | SPAC23H3.04   | 0.5074932 | Novel | NO  | NO | NO  | NO |
| SPAC23H3.04   | SPAC2E1P5.04c | 0.5074893 | Novel | NO  | NO | NO  | NO |
| SPAC821.05    | SPAC23H3.04   | 0.5074892 | Novel | NO  | NO | NO  | NO |
| SPAC23H3.04   | SPCC1529.01   | 0.507488  | Novel | YES | NO | NO  | NO |
| SPBC365.12c   | SPAC23H3.04   | 0.5074851 | Novel | NO  | NO | NO  | NO |
| SPBP23A10.08  | SPAC23H3.04   | 0.5074843 | Novel | NO  | NO | NO  | NO |
| SPBC3H7.13    | SPAC23H3.04   | 0.5074839 | Novel | NO  | NO | YES | NO |
| SPAC23H3.04   | SPAC644.04    | 0.5074837 | Novel | NO  | NO | NO  | NO |
| SPAC6B12.11   | SPAC23H3.04   | 0.5074815 | Novel | NO  | NO | NO  | NO |
| SPAC23H3.04   | SPBC32H8.12c  | 0.5074795 | Novel | NO  | NO | NO  | NO |
| SPAC23H3.04   | SPAC1834.01   | 0.5074771 | Novel | NO  | NO | NO  | NO |
| SPAC23H3.04   | SPBC646.11    | 0.5074743 | Novel | NO  | NO | NO  | NO |
| SPAC23H3.04   | SPAC26H5.06   | 0.5074738 | Novel | NO  | NO | NO  | NO |
| SPAC23H3.04   | SPAC23H3.08c  | 0.5074726 | Novel | NO  | NO | NO  | NO |
| SPBC1685.11   | SPAC23H3.04   | 0.5074627 | Novel | NO  | NO | NO  | NO |
| SPAC23H3.04   | SPBC30B4.07c  | 0.5074627 | Novel | NO  | NO | NO  | NO |
| SPAC23H3.04   | SPAC6F12.14   | 0.5074627 | Novel | NO  | NO | NO  | NO |
| SPAC23H3.04   | SPAC1751.03   | 0.5074627 | Novel | NO  | NO | NO  | NO |
| SPCC16C4.03   | SPAC23H3.04   | 0.5074627 | Novel | NO  | NO | NO  | NO |
| SPAC23H3.04   | SPCP31B10.03c | 0.5074627 | Novel | NO  | NO | NO  | NO |
| SPAC23H3.04   | SPCC1393.04   | 0.5074627 | Novel | NO  | NO | NO  | NO |
| SPAC23H3.04   | SPAC12B10.07  | 0.5074627 | Novel | NO  | NO | NO  | NO |
| SPAC23H3.04   | SPCC4B3.12    | 0.5074556 | Novel | NO  | NO | NO  | NO |
| SPAC23H3.04   | SPBC16E9.14c  | 0.5074546 | Novel | YES | NO | NO  | NO |
| SPAC9.10      | SPAC23H3.04   | 0.5074523 | Novel | YES | NO | NO  | NO |
| SPAC23H3.04   | SPCC4B3.14    | 0.5074517 | Novel | NO  | NO | NO  | NO |
| SPAC23H3.04   | SPBC106.06    | 0.5074509 | Novel | NO  | NO | NO  | NO |
| SPCC576.08c   | SPAC23H3.04   | 0.5074499 | Novel | NO  | NO | NO  | NO |
| SPCC1753.02c  | SPAC23H3.04   | 0.5074493 | Novel | YES | NO | NO  | NO |
| SPAC23H3.04   | SPAC20G4.07c  | 0.5074489 | Novel | YES | NO | NO  | NO |
| SPAC23H3.04   | SPCC11E10.07c | 0.5074442 | Novel | NO  | NO | NO  | NO |
| SPBC354.12    | SPAC23H3.04   | 0.5074438 | Novel | NO  | NO | NO  | NO |
| SPAC23H3.04   | SPCC1753.05   | 0.5074411 | Novel | NO  | NO | NO  | NO |
| SPAC23H3.04   | SPCC16A11.05c | 0.5074384 | Novel | NO  | NO | NO  | NO |
| SPAC23H3.04   | SPAC637.10c   | 0.507436  | Novel | NO  | NO | NO  | NO |
| SPAC22E12.06c | SPAC23H3.04   | 0.5074341 | Novel | YES | NO | NO  | NO |
| SPAC23H3.04   | SPAC13A11.03  | 0.5074314 | Novel | NO  | NO | NO  | NO |
| SPAC23H3.04   | SPCC285.09c   | 0.5074262 | Novel | NO  | NO | NO  | NO |

|               |               |           |       |     |    |     |    |
|---------------|---------------|-----------|-------|-----|----|-----|----|
| SPAC23H3.04   | SPBC17G9.10   | 0.5074242 | Novel | NO  | NO | NO  | NO |
| SPAC23H3.04   | SPAC26A3.07c  | 0.5074242 | Novel | NO  | NO | NO  | NO |
| SPAC23H3.04   | SPBP16F5.02   | 0.5074233 | Novel | NO  | NO | NO  | NO |
| SPAC977.10    | SPAC23H3.04   | 0.5074228 | Novel | YES | NO | NO  | NO |
| SPAC23H3.04   | SPCC1223.11   | 0.5074202 | Novel | NO  | NO | NO  | NO |
| SPAC23H3.04   | SPBC15D4.15   | 0.5074199 | Novel | NO  | NO | NO  | NO |
| SPAC23H3.04   | SPBC409.03    | 0.5074175 | Novel | NO  | NO | NO  | NO |
| SPAC23H3.04   | SPAC3A12.14   | 0.5074171 | Novel | NO  | NO | NO  | NO |
| SPAC12G12.03  | SPAC23H3.04   | 0.5074145 | Novel | NO  | NO | NO  | NO |
| SPBC2A9.12    | SPAC23H3.04   | 0.507414  | Novel | NO  | NO | NO  | NO |
| SPBC839.07    | SPAC23H3.04   | 0.5074125 | Novel | NO  | NO | NO  | NO |
| SPAC23H3.04   | SPCC4B3.16    | 0.5074114 | Novel | NO  | NO | NO  | NO |
| SPAC23H3.04   | SPAC12G12.11c | 0.5074109 | Novel | NO  | NO | YES | NO |
| SPAC23H3.04   | SPBC16A3.07c  | 0.5074072 | Novel | NO  | NO | NO  | NO |
| SPAC6C3.08    | SPAC23H3.04   | 0.5074072 | Novel | NO  | NO | NO  | NO |
| SPAC23H3.04   | SPAC4F10.12   | 0.5074055 | Novel | NO  | NO | NO  | NO |
| SPAC1783.03   | SPAC23H3.04   | 0.5073998 | Novel | NO  | NO | NO  | NO |
| SPAC23H3.04   | SPAC4A8.04    | 0.5073961 | Novel | YES | NO | NO  | NO |
| SPAC23H3.04   | SPAPB2B4.02   | 0.5073922 | Novel | NO  | NO | NO  | NO |
| SPAC23H3.04   | SPAC15E1.06   | 0.5073916 | Novel | NO  | NO | NO  | NO |
| SPAC23H3.04   | SPAPB24D3.04c | 0.5073913 | Novel | NO  | NO | NO  | NO |
| SPAC23H3.04   | SPBC651.03c   | 0.5073868 | Novel | YES | NO | NO  | NO |
| SPAC23H3.04   | SPCC895.04c   | 0.5073831 | Novel | YES | NO | NO  | NO |
| SPAC13G6.07c  | SPAC23H3.04   | 0.5073813 | Novel | NO  | NO | NO  | NO |
| SPAC23H3.04   | SPAPB1E7.12   | 0.5073813 | Novel | NO  | NO | NO  | NO |
| SPAC23H3.04   | SPAC17G6.04c  | 0.5073805 | Novel | NO  | NO | NO  | NO |
| SPAC23H3.04   | SPCC622.17    | 0.5073795 | Novel | NO  | NO | NO  | NO |
| SPAC23H3.04   | SPAC4G9.13c   | 0.5073771 | Novel | NO  | NO | NO  | NO |
| SPAC23H3.04   | SPBC36.05c    | 0.5073699 | Novel | NO  | NO | NO  | NO |
| SPAC23H3.04   | SPAC22F3.02   | 0.5073684 | Novel | NO  | NO | NO  | NO |
| SPAC23H3.04   | SPAC20H4.03c  | 0.5073646 | Novel | NO  | NO | NO  | NO |
| SPAC3H8.10    | SPAC23H3.04   | 0.5073621 | Novel | NO  | NO | NO  | NO |
| SPAC23H3.04   | SPAC4C5.04    | 0.507359  | Novel | NO  | NO | NO  | NO |
| SPAC23H3.04   | SPCC1827.08c  | 0.507358  | Novel | NO  | NO | NO  | NO |
| SPAC23H3.04   | SPAC6G9.13c   | 0.507357  | Novel | NO  | NO | NO  | NO |
| SPAC57A10.10c | SPAC23H3.04   | 0.5073557 | Novel | NO  | NO | NO  | NO |
| SPAC23H3.04   | SPACUNK4.06c  | 0.5073456 | Novel | NO  | NO | NO  | NO |
| SPAC23H3.04   | SPBC725.02    | 0.5073437 | Novel | NO  | NO | NO  | NO |
| SPAC23H3.04   | SPBC21.04     | 0.5073308 | Novel | NO  | NO | NO  | NO |
| SPBC1A4.02c   | SPAC23H3.04   | 0.507327  | Novel | NO  | NO | NO  | NO |
| SPBC3B9.21    | SPAC23H3.04   | 0.5073245 | Novel | NO  | NO | NO  | NO |
| SPAC23H3.04   | SPAC17A2.13c  | 0.50732   | Novel | NO  | NO | NO  | NO |
| SPAC23H3.04   | SPAC2G11.07c  | 0.5073191 | Novel | NO  | NO | NO  | NO |
| SPAC23H3.04   | SPAC926.03    | 0.507318  | Novel | NO  | NO | NO  | NO |
| SPAC23H3.04   | SPBC26H8.01   | 0.5073178 | Novel | NO  | NO | NO  | NO |
| SPAC23H3.04   | SPBC28F2.07   | 0.5073134 | Novel | NO  | NO | NO  | NO |
| SPAC23H3.04   | SPAC1006.01   | 0.5073107 | Novel | NO  | NO | NO  | NO |

|               |               |           |       |    |    |    |    |
|---------------|---------------|-----------|-------|----|----|----|----|
| SPAC630.03    | SPAC23H3.04   | 0.507309  | Novel | NO | NO | NO | NO |
| SPAC23H3.04   | SPCC830.06    | 0.5073086 | Novel | NO | NO | NO | NO |
| SPCC1672.08c  | SPAC23H3.04   | 0.5073056 | Novel | NO | NO | NO | NO |
| SPAC23H3.04   | SPAC16E8.16   | 0.5073046 | Novel | NO | NO | NO | NO |
| SPCC1840.10   | SPAC23H3.04   | 0.5073035 | Novel | NO | NO | NO | NO |
| SPAC23H3.04   | SPCC550.05    | 0.5072945 | Novel | NO | NO | NO | NO |
| SPAC23H3.04   | SPAC16A10.06c | 0.5072942 | Novel | NO | NO | NO | NO |
| SPAC17H9.03c  | SPAC23H3.04   | 0.5072929 | Novel | NO | NO | NO | NO |
| SPBC32F12.06  | SPAC23H3.04   | 0.5072871 | Novel | NO | NO | NO | NO |
| SPAC31G5.11   | SPAC23H3.04   | 0.507283  | Novel | NO | NO | NO | NO |
| SPAC23H3.04   | SPBC28E12.01c | 0.5072826 | Novel | NO | NO | NO | NO |
| SPCC1259.10   | SPAC23H3.04   | 0.5072804 | Novel | NO | NO | NO | NO |
| SPAC23H3.04   | SPCC645.04    | 0.5072791 | Novel | NO | NO | NO | NO |
| SPAC23H3.04   | SPBC11B10.06  | 0.5072742 | Novel | NO | NO | NO | NO |
| SPAC23H3.04   | SPBC4C3.07    | 0.5072728 | Novel | NO | NO | NO | NO |
| SPAC23H3.04   | SPBC1271.01c  | 0.5072727 | Novel | NO | NO | NO | NO |
| SPAC23H3.04   | SPBC14C8.01c  | 0.5072722 | Novel | NO | NO | NO | NO |
| SPAC15E1.07c  | SPAC23H3.04   | 0.5072676 | Novel | NO | NO | NO | NO |
| SPBC215.05    | SPAC23H3.04   | 0.5072669 | Novel | NO | NO | NO | NO |
| SPAC1002.15c  | SPAC23H3.04   | 0.5072657 | Novel | NO | NO | NO | NO |
| SPAC23H3.04   | SPBC30D10.04  | 0.50726   | Novel | NO | NO | NO | NO |
| SPAC23H3.04   | SPAC23C4.15   | 0.5072595 | Novel | NO | NO | NO | NO |
| SPAC23H3.04   | SPAC16E8.15   | 0.5072527 | Novel | NO | NO | NO | NO |
| SPAC23H3.04   | SPBC20F10.01  | 0.5072409 | Novel | NO | NO | NO | NO |
| SPBC12D12.06  | SPAC23H3.04   | 0.5072342 | Novel | NO | NO | NO | NO |
| SPAC23H3.04   | SPAC8E11.02c  | 0.5072248 | Novel | NO | NO | NO | NO |
| SPBC21C3.05   | SPAC23H3.04   | 0.5072215 | Novel | NO | NO | NO | NO |
| SPAP8A3.04c   | SPAC23H3.04   | 0.507219  | Novel | NO | NO | NO | NO |
| SPAC17C9.05c  | SPAC23H3.04   | 0.5072159 | Novel | NO | NO | NO | NO |
| SPAC23H3.04   | SPBC1734.14c  | 0.5072086 | Novel | NO | NO | NO | NO |
| SPAC23H3.04   | SPBP4H10.21c  | 0.5071871 | Novel | NO | NO | NO | NO |
| SPCC576.03c   | SPAC23H3.04   | 0.5071866 | Novel | NO | NO | NO | NO |
| SPAPB17E12.02 | SPAC23H3.04   | 0.5071725 | Novel | NO | NO | NO | NO |
| SPAC23H3.04   | SPAC19B12.12c | 0.5071725 | Novel | NO | NO | NO | NO |
| SPAC5D6.08c   | SPAC23H3.04   | 0.5071715 | Novel | NO | NO | NO | NO |
| SPAC23H3.04   | SPAC4G9.11c   | 0.50717   | Novel | NO | NO | NO | NO |
| SPAC3G9.04    | SPAC23H3.04   | 0.5071608 | Novel | NO | NO | NO | NO |
| SPAC23H3.04   | SPCC16C4.13c  | 0.507156  | Novel | NO | NO | NO | NO |
| SPAC23H3.04   | SPCC31H12.04c | 0.507156  | Novel | NO | NO | NO | NO |
| SPAC23H3.04   | SPBC21B10.12  | 0.5071514 | Novel | NO | NO | NO | NO |
| SPAC589.08c   | SPAC23H3.04   | 0.5071335 | Novel | NO | NO | NO | NO |
| SPAC22E12.08  | SPAC23H3.04   | 0.5071226 | Novel | NO | NO | NO | NO |
| SPAC23H3.04   | SPAC3C7.14c   | 0.5071038 | Novel | NO | NO | NO | NO |
| SPAC1071.12c  | SPAC23H3.04   | 0.5071002 | Novel | NO | NO | NO | NO |
| SPAC23H3.04   | SPBC14C8.12   | 0.5070966 | Novel | NO | NO | NO | NO |
| SPAC23H3.04   | SPBC23G7.11   | 0.5070934 | Novel | NO | NO | NO | NO |
| SPAC23H3.04   | SPCC970.12    | 0.5070896 | Novel | NO | NO | NO | NO |

|               |               |           |       |     |     |     |    |
|---------------|---------------|-----------|-------|-----|-----|-----|----|
| SPAC23H3.04   | SPAC26F1.06   | 0.5070896 | Novel | NO  | NO  | NO  | NO |
| SPAC23H3.04   | SPAC21E11.04  | 0.5070856 | Novel | NO  | NO  | NO  | NO |
| SPAC5D6.05    | SPAC23H3.04   | 0.5070816 | Novel | NO  | NO  | NO  | NO |
| SPAC23H3.04   | SPAC1142.05   | 0.507075  | Novel | YES | NO  | NO  | NO |
| SPAC23H3.04   | SPBC31F10.09c | 0.5070613 | Novel | NO  | NO  | NO  | NO |
| SPAC23H3.04   | SPBC3E7.14    | 0.5070579 | Novel | NO  | NO  | NO  | NO |
| SPAC23H3.04   | SPAC6F6.07c   | 0.5070556 | Novel | NO  | NO  | NO  | NO |
| SPAC13D6.02c  | SPAC23H3.04   | 0.5070522 | Novel | NO  | NO  | NO  | NO |
| SPAC23H3.04   | SPBC23G7.16   | 0.5070462 | Novel | YES | NO  | NO  | NO |
| SPAC23H3.04   | SPAC26A3.08   | 0.5070429 | Novel | NO  | NO  | NO  | NO |
| SPAC23H3.04   | SPAC9E9.13    | 0.5070337 | Novel | NO  | NO  | NO  | NO |
| SPAC23H3.04   | SPAC227.08c   | 0.5070278 | Novel | NO  | NO  | NO  | NO |
| SPAC23H3.04   | SPBC725.13c   | 0.5070259 | Novel | NO  | NO  | NO  | NO |
| SPAC23H3.04   | SPBP35G2.09   | 0.5070232 | Novel | NO  | NO  | NO  | NO |
| SPBC29A3.16   | SPAC23H3.04   | 0.5070159 | Novel | NO  | NO  | NO  | NO |
| SPAC23H3.04   | SPBC8D2.04    | 0.5069779 | Novel | NO  | NO  | NO  | NO |
| SPAC23H3.04   | SPAC1834.04   | 0.5069779 | Novel | NO  | NO  | NO  | NO |
| SPAC23H3.04   | SPBC1105.11c  | 0.5069779 | Novel | NO  | NO  | NO  | NO |
| SPAC23H3.04   | SPAC3A12.07   | 0.5069747 | Novel | NO  | NO  | NO  | NO |
| SPAC23H3.04   | SPAC9.02c     | 0.506972  | Novel | NO  | NO  | NO  | NO |
| SPAC23H3.04   | SPBC28F2.03   | 0.5069617 | Novel | NO  | NO  | NO  | NO |
| SPAC23H3.04   | SPBC337.14    | 0.506948  | Novel | NO  | NO  | NO  | NO |
| SPAC23H3.04   | SPBC24C6.11   | 0.5069456 | Novel | NO  | NO  | NO  | NO |
| SPAC23H3.04   | SPAC29A4.05   | 0.5069331 | Novel | NO  | NO  | NO  | NO |
| SPAC23H3.04   | SPAC7D4.07c   | 0.5069296 | Novel | NO  | NO  | NO  | NO |
| SPBC119.08    | SPBC19F8.07   | 0.5069259 | Novel | YES | YES | YES | NO |
| SPAC23H3.04   | SPCC24B10.13  | 0.50692   | Novel | NO  | NO  | YES | NO |
| SPBC4B4.05    | SPAC23H3.04   | 0.5068966 | Novel | NO  | NO  | NO  | NO |
| SPAC23H3.04   | SPAC17G6.06   | 0.5068916 | Novel | NO  | NO  | NO  | NO |
| SPAC27D7.07c  | SPAC23H3.04   | 0.506884  | Novel | NO  | NO  | NO  | NO |
| SPAC23H3.04   | SPAC1805.08   | 0.5068787 | Novel | NO  | NO  | NO  | NO |
| SPAC11H11.05c | SPAC23H3.04   | 0.5068657 | Novel | NO  | NO  | NO  | NO |
| SPAC23H3.04   | SPCC1450.05c  | 0.5068607 | Novel | NO  | NO  | NO  | NO |
| SPAC23H3.04   | SPBC19C2.14   | 0.5068504 | Novel | NO  | NO  | NO  | NO |
| SPAC23H3.04   | SPBC17G9.07   | 0.5068397 | Novel | NO  | NO  | NO  | NO |
| SPAC23H3.04   | SPAC16A10.05c | 0.5068295 | Novel | NO  | NO  | NO  | NO |
| SPAC23H3.04   | SPBC1105.17   | 0.5068125 | Novel | NO  | NO  | NO  | NO |
| SPAC23H3.04   | SPAC15E1.09   | 0.5068066 | Novel | NO  | NO  | NO  | NO |
| SPAC23H3.04   | SPAC4A8.15c   | 0.5067993 | Novel | NO  | NO  | NO  | NO |
| SPAC23H3.04   | SPAPYUG7.04c  | 0.5067958 | Novel | NO  | NO  | NO  | NO |
| SPAC23H3.04   | SPAC16E8.18   | 0.5067843 | Novel | YES | NO  | YES | NO |
| SPAC23H3.04   | SPAC29B12.03  | 0.5067804 | Novel | NO  | NO  | NO  | NO |
| SPBC106.02c   | SPAC23H3.04   | 0.5067804 | Novel | NO  | NO  | NO  | NO |
| SPBC21B10.04c | SPAC23H3.04   | 0.5067671 | Novel | YES | NO  | NO  | NO |
| SPAC23H3.04   | SPBC839.17c   | 0.5067565 | Novel | NO  | NO  | NO  | NO |
| SPAC23H3.04   | SPCC1259.03   | 0.5067463 | Novel | NO  | NO  | NO  | NO |
| SPBC21C3.16c  | SPAC23H3.04   | 0.5067338 | Novel | NO  | NO  | NO  | NO |

|               |               |           |       |     |     |     |     |
|---------------|---------------|-----------|-------|-----|-----|-----|-----|
| SPAC23H3.04   | SPBC11G11.06c | 0.5067279 | Novel | NO  | NO  | NO  | NO  |
| SPAC23H3.04   | SPAC2C4.03c   | 0.5067164 | Novel | NO  | NO  | NO  | NO  |
| SPAC23H3.04   | SPAC22A12.05  | 0.5066998 | Novel | NO  | NO  | NO  | NO  |
| SPBC1685.10   | SPAC23H3.04   | 0.5066231 | Novel | NO  | NO  | NO  | NO  |
| SPAC23H3.04   | SPCC970.05    | 0.5065672 | Novel | NO  | NO  | NO  | NO  |
| SPAC23H3.04   | SPBC405.07    | 0.5065672 | Novel | NO  | NO  | NO  | NO  |
| SPAC23H3.04   | SPAC14C4.16   | 0.5065271 | Novel | NO  | NO  | NO  | NO  |
| SPAC23H3.04   | SPBC18E5.06   | 0.5064091 | Novel | NO  | NO  | NO  | NO  |
| SPBC31E1.03   | SPAC23H3.04   | 0.5063018 | Novel | NO  | NO  | NO  | NO  |
| SPBC1734.14c  | SPBC19F8.07   | 0.5062955 | Novel | NO  | NO  | NO  | YES |
| SPBC215.04    | SPAC23H3.04   | 0.5061111 | Novel | YES | NO  | NO  | NO  |
| SPAC23H3.04   | SPAC1B3.12c   | 0.506085  | Novel | NO  | NO  | NO  | NO  |
| SPAC22E12.14c | SPAC821.12    | 0.5058621 | Novel | NO  | YES | YES | NO  |
| SPAC23H3.04   | SPBC19C2.03   | 0.5058345 | Novel | NO  | NO  | NO  | NO  |
| SPAC29B12.03  | SPBC19F8.07   | 0.5056058 | Novel | YES | NO  | NO  | YES |
| SPBC409.07c   | SPAC1D4.13    | 0.5054916 | Novel | NO  | YES | YES | NO  |
| SPAC17C9.13c  | SPBC1198.12   | 0.5048728 | Novel | NO  | NO  | NO  | NO  |
| SPAC31G5.09c  | SPCC1739.12   | 0.5046851 | Novel | NO  | NO  | NO  | NO  |
| SPAC110.03    | SPAC3A11.12c  | 0.5044629 | Novel | NO  | NO  | NO  | NO  |
| SPAC23H3.04   | SPBC1711.01c  | 0.5043478 | Novel | NO  | NO  | NO  | NO  |
| SPAC23H3.04   | SPMTR.03      | 0.5043478 | Novel | NO  | NO  | YES | NO  |
| SPBC23G7.17c  | SPAC23H3.04   | 0.5043478 | Novel | NO  | NO  | NO  | NO  |
| SPBC1198.12   | SPBC14C8.01c  | 0.5040842 | Novel | NO  | NO  | NO  | YES |
| SPAC3A11.12c  | SPBP19A11.03c | 0.503985  | Novel | YES | YES | YES | NO  |
| SPAC3F10.11c  | SPAC9E9.12c   | 0.5039761 | Novel | YES | YES | NO  | NO  |
| SPAC3A11.12c  | SPAPB8E5.02c  | 0.5039627 | Novel | NO  | NO  | YES | NO  |
| SPAC1420.03   | SPAC3A11.12c  | 0.5039627 | Novel | NO  | NO  | YES | YES |
| SPAC31G5.09c  | SPBC16E9.11c  | 0.5035771 | Novel | NO  | NO  | NO  | NO  |
| SPAC23C4.08   | SPBC1685.02c  | 0.5033342 | Novel | NO  | NO  | NO  | NO  |
| SPAC31G5.09c  | SPAC823.15    | 0.5033115 | Novel | NO  | NO  | NO  | NO  |
| SPCC1223.06   | SPBC32C12.03c | 0.5032806 | Novel | NO  | NO  | NO  | NO  |
| SPBC409.07c   | SPBC1D7.05    | 0.5031117 | Novel | YES | YES | YES | NO  |
| SPAC1783.07c  | SPBC119.08    | 0.5030936 | Novel | YES | NO  | NO  | NO  |
| SPAC57A7.08   | SPAC823.15    | 0.5030242 | Novel | NO  | YES | YES | NO  |
| SPCC4E9.02    | SPAPB2B4.03   | 0.5029891 | Novel | NO  | YES | YES | NO  |
| SPCC18B5.03   | SPCC320.13c   | 0.5029207 | Novel | NO  | YES | NO  | NO  |
| SPAC24B11.06c | SPBC32H8.10   | 0.5027707 | Novel | NO  | YES | YES | NO  |
| SPBC119.08    | SPAC11G7.02   | 0.5026075 | Novel | YES | NO  | NO  | NO  |
| SPCC1739.12   | SPAC3F10.02c  | 0.5024161 | Novel | NO  | NO  | NO  | NO  |
| SPBC1709.01   | SPAC3A12.14   | 0.5020915 | Novel | NO  | YES | NO  | YES |
| SPBC1198.12   | SPBC106.09    | 0.5020589 | Novel | NO  | NO  | NO  | YES |
| SPBC409.07c   | SPBC19F8.07   | 0.5018145 | Novel | YES | YES | YES | YES |
| SPAC110.03    | SPAC24B11.06c | 0.5017867 | Novel | NO  | YES | NO  | NO  |
| SPAC24B11.06c | SPCC320.13c   | 0.5013438 | Novel | NO  | YES | NO  | NO  |
| SPAC24B11.11c | SPAC23D3.10c  | 0.5013318 | Novel | NO  | NO  | NO  | NO  |
| SPBC11B10.09  | SPAC23C4.19   | 0.5013151 | Novel | NO  | YES | NO  | NO  |
| SPBP19A11.04c | SPAC2C4.14c   | 0.5012581 | Novel | YES | NO  | NO  | NO  |

|               |               |           |       |     |     |     |     |
|---------------|---------------|-----------|-------|-----|-----|-----|-----|
| SPAC1D4.13    | SPCC1322.08   | 0.5011856 | Novel | NO  | YES | YES | NO  |
| SPBC16E9.10c  | SPBC14C8.01c  | 0.5011851 | Novel | NO  | NO  | NO  | NO  |
| SPBC1198.12   | SPBC20F10.06  | 0.5011492 | Novel | NO  | YES | NO  | YES |
| SPAC1786.02   | SPAC23H3.13c  | 0.5010627 | Novel | NO  | NO  | NO  | NO  |
| SPCC576.03c   | SPBC119.08    | 0.5008821 | Novel | YES | YES | NO  | NO  |
| SPCC1753.02c  | SPAC1786.02   | 0.500843  | Novel | NO  | NO  | NO  | NO  |
| SPCC1682.04   | SPBC146.13c   | 0.5007603 | Novel | NO  | NO  | NO  | NO  |
| SPBPB8B6.04c  | SPBC1198.12   | 0.5007316 | Novel | NO  | NO  | NO  | NO  |
| SPBC543.07    | SPAC823.15    | 0.5005112 | Novel | NO  | NO  | NO  | NO  |
| SPAC19D5.01   | SPBC119.08    | 0.500459  | Novel | YES | YES | NO  | NO  |
| SPAC1805.17   | SPBC119.08    | 0.5000902 | Novel | NO  | NO  | NO  | NO  |
| SPBC2F12.09c  | SPBC119.08    | 0.4998006 | Novel | NO  | NO  | NO  | NO  |
| SPCC24B10.07  | SPBC119.08    | 0.4996752 | Novel | NO  | YES | YES | NO  |
| SPAC4D7.05    | SPAC3A11.12c  | 0.4991697 | Novel | NO  | NO  | NO  | NO  |
| SPBC405.04c   | SPAC4C5.02c   | 0.4991138 | Novel | NO  | YES | YES | NO  |
| SPBC16A3.15c  | SPBC26H8.07c  | 0.4989307 | Novel | YES | YES | YES | YES |
| SPAC24B11.06c | SPBC16H5.07c  | 0.4988699 | Novel | YES | NO  | NO  | YES |
| SPBC21.06c    | SPBC776.02c   | 0.4986801 | Novel | NO  | NO  | NO  | YES |
| SPAC9G1.09    | SPAC2C4.14c   | 0.4983086 | Novel | NO  | YES | YES | NO  |
| SPAC24B11.11c | SPCC1739.12   | 0.4980436 | Novel | NO  | YES | NO  | NO  |
| SPAC17A2.09c  | SPBC119.08    | 0.4980104 | Novel | YES | NO  | NO  | NO  |
| SPAC821.12    | SPAC1F5.09c   | 0.498     | Novel | NO  | YES | YES | YES |
| SPCC4F11.02   | SPBC119.08    | 0.4979498 | Novel | NO  | NO  | NO  | NO  |
| SPAPYUG7.02c  | SPBC119.08    | 0.4979104 | Novel | NO  | YES | YES | NO  |
| SPBC4F6.12    | SPAC3A12.14   | 0.4978411 | Novel | NO  | YES | NO  | NO  |
| SPBC9B6.10    | SPBC119.08    | 0.4977823 | Novel | YES | YES | NO  | NO  |
| SPAC22H10.12c | SPAPB1A10.10c | 0.4975556 | Novel | NO  | NO  | YES | NO  |
| SPBC119.08    | SPAC26F1.10c  | 0.4973808 | Novel | NO  | NO  | NO  | NO  |
| SPAC3A11.12c  | SPAC637.10c   | 0.4972831 | Novel | YES | NO  | YES | YES |
| SPBC26H8.05c  | SPAC4A8.12c   | 0.4971499 | Novel | NO  | NO  | NO  | NO  |
| SPCC1259.13   | SPBC18H10.15  | 0.4969604 | Novel | NO  | YES | YES | NO  |
| SPAC3F10.18c  | SPCC550.05    | 0.4968701 | Novel | NO  | NO  | NO  | NO  |
| SPCC550.05    | SPAC3G6.13c   | 0.4968701 | Novel | NO  | NO  | NO  | NO  |
| SPAC3A11.12c  | SPAC6G9.08    | 0.4968569 | Novel | NO  | NO  | YES | NO  |
| SPAC23H3.04   | SPBC8D2.01    | 0.4967346 | Novel | NO  | NO  | NO  | NO  |
| SPBC1A4.02c   | SPBC119.08    | 0.4967009 | Novel | NO  | NO  | NO  | NO  |
| SPBP16F5.02   | SPBC18H10.15  | 0.4966692 | Novel | NO  | NO  | NO  | NO  |
| SPAC328.03    | SPAC3G6.09c   | 0.4966002 | Novel | NO  | NO  | YES | NO  |
| SPCC576.10c   | SPAC110.03    | 0.4965787 | Novel | NO  | NO  | NO  | NO  |
| SPAC3A11.12c  | SPBC409.06    | 0.4965644 | Novel | NO  | NO  | YES | YES |
| SPAC977.10    | SPBC119.08    | 0.4965487 | Novel | NO  | NO  | YES | NO  |
| SPBC11B10.09  | SPBC29B5.01   | 0.4964489 | Novel | NO  | YES | NO  | YES |
| SPBC660.07    | SPAC3G6.09c   | 0.4963654 | Novel | NO  | NO  | NO  | NO  |
| SPAC57A7.08   | SPBC16H5.07c  | 0.4961407 | Novel | YES | YES | YES | NO  |
| SPBC26H8.07c  | SPBC800.05c   | 0.4959722 | Novel | YES | YES | YES | YES |
| SPBC1A4.08c   | SPAC17H9.19c  | 0.495785  | Novel | NO  | NO  | NO  | NO  |
| SPAC24B11.11c | SPCC16C4.11   | 0.4957515 | Novel | NO  | YES | YES | NO  |



|               |               |           |       |     |     |     |     |
|---------------|---------------|-----------|-------|-----|-----|-----|-----|
| SPBC428.13c   | SPAP8A3.08    | 0.4957514 | Novel | YES | YES | NO  | NO  |
| SPAC4F10.15c  | SPAC2C4.14c   | 0.4955877 | Novel | NO  | NO  | NO  | NO  |
| SPBC16E9.10c  | SPBC887.04c   | 0.4955104 | Novel | NO  | NO  | NO  | NO  |
| SPBC18H10.15  | SPBC4C3.12    | 0.4954277 | Novel | NO  | NO  | NO  | NO  |
| SPBC409.05    | SPCC794.01c   | 0.4953978 | Novel | NO  | NO  | NO  | NO  |
| SPBC409.07c   | SPAC2C4.14c   | 0.4953756 | Novel | NO  | YES | YES | NO  |
| SPAC3C7.13c   | SPBC409.05    | 0.495331  | Novel | NO  | NO  | NO  | NO  |
| SPBC16E9.10c  | SPAC2C4.15c   | 0.4948755 | Novel | NO  | NO  | NO  | NO  |
| SPAC343.09    | SPBC16E9.10c  | 0.4948614 | Novel | NO  | NO  | NO  | NO  |
| SPAC17G6.16c  | SPBC26H8.05c  | 0.4948519 | Novel | NO  | NO  | NO  | NO  |
| SPCC16C4.11   | SPAC6B12.15   | 0.4946128 | Novel | NO  | YES | NO  | NO  |
| SPAC824.04    | SPBC26H8.05c  | 0.4943741 | Novel | NO  | NO  | NO  | NO  |
| SPAC664.01c   | SPAC18B11.07c | 0.4938708 | Novel | NO  | NO  | YES | NO  |
| SPAC1D4.13    | SPAC23A1.06c  | 0.4937855 | Novel | NO  | YES | YES | NO  |
| SPAC24B11.11c | SPBC1604.14c  | 0.4937429 | Novel | NO  | YES | YES | YES |
| SPBC21D10.12  | SPBC13E7.09   | 0.4936975 | Novel | YES | YES | NO  | YES |
| SPAC4D7.05    | SPCC1682.16   | 0.4936108 | Novel | NO  | NO  | NO  | NO  |
| SPCC18B5.03   | SPAC20H4.09   | 0.4935823 | Novel | NO  | YES | NO  | NO  |
| SPAC23H3.04   | SPBC359.05    | 0.4932309 | Novel | YES | NO  | NO  | NO  |
| SPAC30D11.10  | SPAC18B11.07c | 0.4928115 | Novel | NO  | NO  | NO  | NO  |
| SPAC1B9.02c   | SPAC821.12    | 0.4927589 | Novel | NO  | YES | YES | NO  |
| SPBC18H10.15  | SPCC1739.11c  | 0.4926862 | Novel | NO  | NO  | NO  | NO  |
| SPBC26H8.05c  | SPBC25B2.05   | 0.4924407 | Novel | NO  | NO  | NO  | NO  |
| SPAC57A7.08   | SPCC1739.12   | 0.4923796 | Novel | NO  | YES | YES | NO  |
| SPAC1D4.13    | SPBC19C2.05   | 0.4922188 | Novel | NO  | YES | YES | YES |
| SPAC16A10.04  | SPAC23D3.10c  | 0.4921999 | Novel | NO  | NO  | NO  | NO  |
| SPAC17C9.13c  | SPBC26H8.05c  | 0.4919009 | Novel | NO  | NO  | NO  | NO  |
| SPAC8E11.02c  | SPAC20H4.09   | 0.4918289 | Novel | NO  | NO  | NO  | NO  |
| SPAC20H4.09   | SPAC23C11.11  | 0.4916668 | Novel | NO  | YES | NO  | NO  |
| SPCC576.15c   | SPAC821.12    | 0.4916579 | Novel | NO  | YES | YES | NO  |
| SPAC1F3.02c   | SPBC776.02c   | 0.4916508 | Novel | YES | NO  | NO  | YES |
| SPCC1682.16   | SPAC637.10c   | 0.4916038 | Novel | YES | NO  | YES | NO  |
| SPCC576.15c   | SPBC106.10    | 0.4912687 | Novel | YES | YES | YES | NO  |
| SPAC20H4.11c  | SPAC1250.03   | 0.4912658 | Novel | NO  | NO  | NO  | NO  |
| SPCC1682.16   | SPBC646.09c   | 0.4907117 | Novel | NO  | NO  | YES | NO  |
| SPBC26H8.05c  | SPAC6F12.15c  | 0.4907043 | Novel | NO  | NO  | NO  | NO  |
| SPCC1682.16   | SPBC409.06    | 0.4906789 | Novel | NO  | NO  | YES | NO  |
| SPCC1682.16   | SPBP19A11.03c | 0.4906579 | Novel | YES | YES | YES | NO  |
| SPCC1682.16   | SPAC6G9.08    | 0.4906298 | Novel | NO  | NO  | YES | NO  |
| SPAPB8E5.02c  | SPCC1682.16   | 0.4905149 | Novel | NO  | NO  | YES | NO  |
| SPAC1420.03   | SPCC1682.16   | 0.4905149 | Novel | NO  | NO  | YES | NO  |
| SPAPB1A10.10c | SPAC4C5.02c   | 0.4904936 | Novel | NO  | YES | YES | NO  |
| SPAC23A1.06c  | SPBC18H10.15  | 0.490009  | Novel | NO  | YES | YES | NO  |
| SPAC24B11.11c | SPAPB15E9.01c | 0.4897943 | Novel | NO  | NO  | NO  | NO  |
| SPBC776.02c   | SPCC1739.11c  | 0.489592  | Novel | YES | NO  | NO  | YES |
| SPBC26H8.05c  | SPCC622.09    | 0.4893333 | Novel | NO  | NO  | NO  | NO  |
| SPCC4E9.02    | SPBC11B10.09  | 0.4891723 | Novel | NO  | NO  | YES | NO  |

|               |               |           |       |     |     |     |     |
|---------------|---------------|-----------|-------|-----|-----|-----|-----|
| SPBC405.04c   | SPBP4H10.04   | 0.4889889 | Novel | NO  | NO  | NO  | NO  |
| SPAC31G5.09c  | SPAC16A10.04  | 0.4886224 | Novel | NO  | NO  | NO  | NO  |
| SPAC1952.07   | SPCC1322.08   | 0.4885719 | Novel | NO  | YES | NO  | NO  |
| SPAC31G5.09c  | SPAC2C4.14c   | 0.4882286 | Novel | NO  | YES | YES | NO  |
| SPAC926.03    | SPCC1919.10c  | 0.4881602 | Novel | NO  | NO  | NO  | YES |
| SPAC20H4.09   | SPAC644.12    | 0.4879365 | Novel | YES | NO  | YES | NO  |
| SPBC582.03    | SPAC20H4.09   | 0.4878355 | Novel | NO  | NO  | NO  | NO  |
| SPAC1D4.13    | SPAC9G1.02    | 0.4876832 | Novel | NO  | YES | YES | NO  |
| SPAC589.10c   | SPBC337.08c   | 0.4873089 | Novel | NO  | NO  | YES | NO  |
| SPAC6G10.11c  | SPBC337.08c   | 0.4873089 | Novel | NO  | NO  | NO  | YES |
| SPAC926.03    | SPBC146.13c   | 0.4872768 | Novel | YES | YES | NO  | NO  |
| SPAC24B11.06c | SPAC1782.09c  | 0.4872587 | Novel | YES | YES | YES | YES |
| SPCC16C4.11   | SPCC320.13c   | 0.4872433 | Novel | NO  | YES | NO  | NO  |
| SPBC1348.10c  | SPAC23H3.13c  | 0.4872153 | Novel | NO  | NO  | NO  | NO  |
| SPAC977.09c   | SPAC23H3.13c  | 0.4872153 | Novel | NO  | NO  | NO  | NO  |
| SPAC630.03    | SPAC4A8.05c   | 0.4871726 | Novel | NO  | YES | YES | NO  |
| SPAC22H12.02  | SPAC18B11.07c | 0.4870325 | Novel | YES | NO  | YES | NO  |
| SPBC428.08c   | SPAC18B11.07c | 0.4869073 | Novel | NO  | NO  | YES | NO  |
| SPCC1682.04   | SPCC1919.10c  | 0.4867782 | Novel | NO  | NO  | YES | NO  |
| SPCC1753.02c  | SPBC1348.10c  | 0.4865156 | Novel | NO  | NO  | NO  | NO  |
| SPCC1753.02c  | SPAC977.09c   | 0.4865156 | Novel | NO  | NO  | NO  | NO  |
| SPAC22H10.04  | SPAC23H3.04   | 0.4862459 | Novel | NO  | NO  | NO  | NO  |
| SPAC23D3.10c  | SPAC14C4.09   | 0.4859741 | Novel | YES | NO  | NO  | NO  |
| SPAC24B11.06c | SPBC582.03    | 0.4856601 | Novel | NO  | YES | YES | YES |
| SPAC1782.09c  | SPAC23H4.17c  | 0.4856459 | Novel | NO  | NO  | NO  | NO  |
| SPCC18B5.03   | SPBC18H10.15  | 0.4855865 | Novel | NO  | YES | NO  | NO  |
| SPBC649.05    | SPBC18H10.15  | 0.4851689 | Novel | NO  | NO  | NO  | NO  |
| SPCC4E9.02    | SPAC144.13c   | 0.4851542 | Novel | NO  | NO  | NO  | NO  |
| SPAC144.13c   | SPCC5E4.04    | 0.4850401 | Novel | YES | NO  | NO  | YES |
| SPBC18H10.15  | SPAC19E9.03   | 0.4850304 | Novel | NO  | NO  | NO  | NO  |
| SPAC22E12.14c | SPAC1B9.02c   | 0.484865  | Novel | NO  | YES | YES | YES |
| SPBC26H8.07c  | SPBC1347.12   | 0.4846801 | Novel | NO  | NO  | NO  | NO  |
| SPCC4E9.02    | SPBC32F12.09  | 0.4846331 | Novel | NO  | NO  | NO  | NO  |
| SPAC24B11.06c | SPCC24B10.07  | 0.4846171 | Novel | NO  | YES | YES | NO  |
| SPAC4F10.15c  | SPAC9G1.09    | 0.4844176 | Novel | NO  | YES | NO  | NO  |
| SPBC24C6.07   | SPAC23H4.17c  | 0.484258  | Novel | NO  | NO  | NO  | NO  |
| SPBC354.03    | SPAC824.04    | 0.4842398 | Novel | NO  | NO  | NO  | NO  |
| SPAC24B11.11c | SPBC26H8.05c  | 0.4837841 | Novel | NO  | NO  | NO  | NO  |
| SPAC17H9.09c  | SPAC2C4.14c   | 0.4834642 | Novel | NO  | NO  | NO  | NO  |
| SPCC330.10    | SPBC11B10.09  | 0.483463  | Novel | NO  | NO  | NO  | NO  |
| SPAC890.07c   | SPCC794.09c   | 0.4830215 | Novel | NO  | NO  | NO  | NO  |
| SPAC890.07c   | SPAC23A1.10   | 0.4830215 | Novel | NO  | NO  | NO  | NO  |
| SPAC890.07c   | SPBC839.15c   | 0.4830215 | Novel | NO  | NO  | NO  | NO  |
| SPBC106.10    | SPAC17G8.14c  | 0.4828738 | Novel | NO  | YES | YES | NO  |
| SPAPB2B4.03   | SPBC18H10.15  | 0.482816  | Novel | NO  | NO  | NO  | NO  |
| SPAC22F3.09c  | SPBC19F5.01c  | 0.482731  | Novel | NO  | NO  | NO  | YES |
| SPCC576.08c   | SPAC890.07c   | 0.4825598 | Novel | NO  | NO  | NO  | NO  |

|               |               |           |       |     |     |     |     |
|---------------|---------------|-----------|-------|-----|-----|-----|-----|
| SPAC890.07c   | SPBC17G9.07   | 0.4823243 | Novel | NO  | NO  | NO  | NO  |
| SPAC890.07c   | SPAC17G6.06   | 0.482243  | Novel | NO  | NO  | NO  | NO  |
| SPCC777.14    | SPAC222.18    | 0.4822242 | Novel | NO  | NO  | YES | NO  |
| SPAC821.12    | SPCC24B10.07  | 0.4821172 | Novel | NO  | YES | YES | NO  |
| SPBC1289.13c  | SPAC23H3.04   | 0.482056  | Novel | YES | NO  | NO  | NO  |
| SPBC32C12.02  | SPBC11B10.09  | 0.4820545 | Novel | NO  | NO  | NO  | YES |
| SPAC23H3.04   | SPBC1685.02c  | 0.4820086 | Novel | NO  | NO  | NO  | NO  |
| SPAC9G1.09    | SPBC1604.14c  | 0.481785  | Novel | NO  | YES | YES | NO  |
| SPAC1D4.13    | SPAC1006.09   | 0.4816657 | Novel | NO  | YES | YES | NO  |
| SPAC1783.05   | SPAC1250.01   | 0.4815894 | Novel | YES | YES | YES | NO  |
| SPAC23H3.04   | SPBC1709.05   | 0.4815267 | Novel | NO  | NO  | NO  | NO  |
| SPCC1682.16   | SPAC1F7.04    | 0.4813778 | Novel | NO  | NO  | NO  | NO  |
| SPAC144.13c   | SPBC14C8.01c  | 0.4809818 | Novel | NO  | NO  | NO  | YES |
| SPBC11B10.09  | SPACUNK12.02c | 0.4805573 | Novel | NO  | YES | YES | NO  |
| SPCC1672.06c  | SPBC32H8.12c  | 0.4802688 | Novel | NO  | YES | NO  | YES |
| SPAC24B11.06c | SPAC23C4.08   | 0.4799772 | Novel | NO  | YES | NO  | NO  |
| SPBC21D10.12  | SPAC2C4.14c   | 0.4799765 | Novel | NO  | NO  | NO  | NO  |
| SPBC543.07    | SPCC31H12.05c | 0.4799102 | Novel | NO  | NO  | NO  | NO  |
| SPBC18H10.15  | SPAC23C4.19   | 0.4797845 | Novel | NO  | NO  | NO  | NO  |
| SPCC16C4.11   | SPBC776.18c   | 0.4795539 | Novel | NO  | YES | NO  | NO  |
| SPBC11B10.09  | SPAC644.04    | 0.4794559 | Novel | NO  | YES | NO  | NO  |
| SPCC4E9.02    | SPBC19F5.01c  | 0.4794118 | Novel | NO  | YES | YES | NO  |
| SPBC23E6.01c  | SPAC24B11.06c | 0.4790882 | Novel | NO  | NO  | NO  | NO  |
| SPAC6G9.06c   | SPAP8A3.08    | 0.4789464 | Novel | NO  | YES | NO  | NO  |
| SPBC543.07    | SPBC16H5.07c  | 0.4788932 | Novel | YES | NO  | NO  | YES |
| SPAC23C11.16  | SPAC2C4.14c   | 0.4787974 | Novel | NO  | YES | YES | NO  |
| SPAC110.03    | SPAC1D4.13    | 0.4787604 | Novel | NO  | YES | NO  | NO  |
| SPBC543.07    | SPBC19F8.07   | 0.4785381 | Novel | YES | YES | YES | NO  |
| SPBC18H10.15  | SPAC644.06c   | 0.4784367 | Novel | NO  | YES | YES | NO  |
| SPBC19F8.07   | SPAC2C4.14c   | 0.4779885 | Novel | NO  | YES | YES | NO  |
| SPAC9G1.09    | SPAC1F5.09c   | 0.4778101 | Novel | NO  | YES | YES | NO  |
| SPAC1D4.13    | SPAC1F7.04    | 0.4776739 | Novel | NO  | YES | NO  | NO  |
| SPAC23H3.04   | SPAC3G6.13c   | 0.4776119 | Novel | NO  | NO  | NO  | NO  |
| SPAC3F10.18c  | SPAC23H3.04   | 0.4776119 | Novel | NO  | NO  | NO  | NO  |
| SPAC16.01     | SPBC4.07c     | 0.477482  | Novel | NO  | YES | NO  | NO  |
| SPAC24B11.11c | SPBC11B10.09  | 0.4774385 | Novel | NO  | YES | YES | YES |
| SPCC4E9.02    | SPBC582.03    | 0.4772455 | Novel | NO  | YES | YES | NO  |
| SPAC9G1.09    | SPBC336.12c   | 0.4770953 | Novel | NO  | YES | NO  | NO  |
| SPCC18B5.03   | SPACUNK12.02c | 0.4770441 | Novel | NO  | YES | NO  | NO  |
| SPAC16A10.04  | SPBC1685.02c  | 0.4760701 | Novel | NO  | NO  | NO  | NO  |
| SPAC1834.06c  | SPAC2C4.14c   | 0.4759441 | Novel | YES | NO  | NO  | NO  |
| SPBC18H10.15  | SPBC1604.14c  | 0.4759333 | Novel | NO  | YES | YES | NO  |
| SPCC4E9.02    | SPBC1718.01   | 0.4758965 | Novel | NO  | NO  | YES | NO  |
| SPCC777.14    | SPCC188.08c   | 0.475754  | Novel | NO  | NO  | NO  | YES |
| SPCC16C4.11   | SPCC5E4.04    | 0.4757152 | Novel | NO  | YES | NO  | NO  |
| SPBC543.07    | SPCC1739.12   | 0.4755042 | Novel | NO  | NO  | NO  | NO  |
| SPAC24B11.06c | SPBC119.08    | 0.4754418 | Novel | YES | YES | YES | NO  |

|               |               |           |       |     |     |     |     |
|---------------|---------------|-----------|-------|-----|-----|-----|-----|
| SPAC31G5.09c  | SPBC16H5.07c  | 0.4754065 | Novel | NO  | NO  | NO  | NO  |
| SPCC4E9.02    | SPBC14C8.07c  | 0.4750824 | Novel | NO  | NO  | NO  | NO  |
| SPCC4E9.02    | SPCC16A11.17  | 0.4750617 | Novel | NO  | NO  | NO  | NO  |
| SPCC4E9.02    | SPBC4.04c     | 0.4750308 | Novel | NO  | NO  | NO  | NO  |
| SPCC4E9.02    | SPBC19G7.05c  | 0.4749897 | Novel | NO  | NO  | NO  | NO  |
| SPAC222.18    | SPBC530.14c   | 0.4748654 | Novel | NO  | NO  | NO  | NO  |
| SPAC6F6.08c   | SPBC19F8.07   | 0.4748192 | Novel | NO  | NO  | NO  | NO  |
| SPBC18H10.15  | SPBC29A10.15  | 0.4746656 | Novel | NO  | YES | NO  | NO  |
| SPBC11B10.09  | SPAC1F3.02c   | 0.4745939 | Novel | NO  | YES | YES | NO  |
| SPBP4H10.04   | SPAPB1A10.10c | 0.4745768 | Novel | NO  | NO  | NO  | NO  |
| SPCC16C4.11   | SPAC29A4.16   | 0.4743784 | Novel | NO  | YES | YES | NO  |
| SPAC18G6.03   | SPAPB1A10.10c | 0.4742369 | Novel | NO  | YES | YES | NO  |
| SPAC24B11.06c | SPAC22H10.04  | 0.4741056 | Novel | YES | NO  | NO  | NO  |
| SPBC1539.08   | SPBC11C11.04c | 0.4737467 | Novel | NO  | NO  | NO  | NO  |
| SPBC405.04c   | SPAC17D4.03c  | 0.4736687 | Novel | NO  | NO  | NO  | NO  |
| SPCC330.10    | SPBC18H10.15  | 0.4736647 | Novel | NO  | NO  | NO  | NO  |
| SPAC11H11.06  | SPBC26H8.07c  | 0.4734699 | Novel | NO  | NO  | NO  | NO  |
| SPAC19E9.03   | SPAC23H4.17c  | 0.4734633 | Novel | NO  | NO  | NO  | NO  |
| SPAC24B11.06c | SPAC57A10.02  | 0.4734568 | Novel | NO  | YES | YES | YES |
| SPAC17H9.09c  | SPBC1604.14c  | 0.4733803 | Novel | NO  | NO  | YES | YES |
| SPCC4E9.02    | SPCC1739.11c  | 0.4733347 | Novel | NO  | NO  | NO  | NO  |
| SPBC16H5.11c  | SPAC2C4.14c   | 0.4731379 | Novel | NO  | NO  | NO  | NO  |
| SPBC18H10.15  | SPAC644.04    | 0.4730295 | Novel | NO  | NO  | NO  | NO  |
| SPAC4A8.05c   | SPBC776.02c   | 0.4726261 | Novel | NO  | NO  | NO  | YES |
| SPAPB2B4.03   | SPBC1347.12   | 0.4725907 | Novel | NO  | NO  | NO  | NO  |
| SPAC18G6.03   | SPAC1B3.11c   | 0.4723912 | Novel | NO  | YES | YES | NO  |
| SPBC428.13c   | SPCC1682.04   | 0.4723714 | Novel | NO  | NO  | YES | NO  |
| SPAC18G6.03   | SPBC776.02c   | 0.4721112 | Novel | YES | NO  | NO  | YES |
| SPAC24B11.06c | SPCC18B5.11c  | 0.4721088 | Novel | NO  | YES | YES | YES |
| SPAC17D4.03c  | SPAPB1A10.10c | 0.4719458 | Novel | NO  | NO  | NO  | NO  |
| SPBC13G1.11   | SPAC9E9.07c   | 0.4717549 | Novel | NO  | NO  | YES | NO  |
| SPAC1F7.04    | SPBC4.07c     | 0.4717286 | Novel | NO  | YES | NO  | NO  |
| SPCC895.07    | SPAC4C5.02c   | 0.4714912 | Novel | NO  | NO  | NO  | NO  |
| SPCC830.06    | SPBC776.02c   | 0.4713238 | Novel | YES | NO  | NO  | YES |
| SPBC18H10.15  | SPAC26F1.10c  | 0.471093  | Novel | NO  | NO  | NO  | NO  |
| SPAC23H3.04   | SPBC26H8.05c  | 0.4709613 | Novel | NO  | NO  | NO  | NO  |
| SPAC17C9.13c  | SPAC144.13c   | 0.4709367 | Novel | NO  | NO  | NO  | YES |
| SPBC19C7.03   | SPBC11B10.09  | 0.4705737 | Novel | NO  | YES | NO  | YES |
| SPBC24C6.07   | SPBC776.02c   | 0.4705001 | Novel | NO  | NO  | NO  | YES |
| SPBC1685.06   | SPCC18B5.11c  | 0.4702721 | Novel | NO  | YES | NO  | NO  |
| SPCC4E9.02    | SPBC19F8.07   | 0.4702244 | Novel | NO  | NO  | NO  | NO  |
| SPCC1259.13   | SPAC1B2.05    | 0.4702237 | Novel | YES | YES | NO  | YES |
| SPAC1D4.13    | SPAC20H4.11c  | 0.470078  | Novel | NO  | NO  | NO  | NO  |
| SPCC24B10.07  | SPBC12D12.04c | 0.470021  | Novel | NO  | YES | YES | YES |
| SPBP4G3.02    | SPAC23H3.04   | 0.4698397 | Novel | NO  | NO  | YES | NO  |
| SPBC1711.17   | SPAC644.12    | 0.4698175 | Novel | YES | NO  | NO  | NO  |
| SPAC144.13c   | SPBC20F10.06  | 0.4698101 | Novel | NO  | NO  | NO  | YES |

|               |              |           |       |     |     |     |     |
|---------------|--------------|-----------|-------|-----|-----|-----|-----|
| SPBC23E6.01c  | SPAC12G12.03 | 0.4696692 | Novel | NO  | YES | NO  | NO  |
| SPBC23E6.01c  | SPBC16A3.18  | 0.4693781 | Novel | NO  | YES | NO  | NO  |
| SPAC24B11.06c | SPAC23C11.16 | 0.4688116 | Novel | YES | YES | YES | YES |
| SPBC1685.06   | SPBC216.05   | 0.4688008 | Novel | NO  | YES | NO  | NO  |
| SPBC18H10.15  | SPAC19E9.02  | 0.4686211 | Novel | NO  | YES | YES | NO  |
| SPACUNK12.02c | SPAC8E11.02c | 0.468594  | Novel | NO  | NO  | NO  | NO  |
| SPBC543.07    | SPAC17H9.09c | 0.4684884 | Novel | NO  | NO  | YES | NO  |
| SPAC9E9.07c   | SPAC1F5.09c  | 0.4683532 | Novel | NO  | NO  | NO  | NO  |
| SPBC776.02c   | SPAC1565.06c | 0.4682217 | Novel | NO  | NO  | NO  | YES |
| SPCC24B10.07  | SPAC17G8.14c | 0.4680983 | Novel | NO  | YES | YES | YES |
| SPAC144.13c   | SPBC106.09   | 0.467871  | Novel | NO  | NO  | YES | YES |
| SPCC16C4.11   | SPBC1D7.05   | 0.4678323 | Novel | NO  | YES | YES | NO  |
| SPBC660.14    | SPAC57A10.02 | 0.4678162 | Novel | NO  | YES | YES | YES |
| SPBC12D12.04c | SPBC106.10   | 0.4678111 | Novel | NO  | YES | YES | NO  |
| SPBC428.13c   | SPBC776.02c  | 0.4677875 | Novel | NO  | NO  | NO  | YES |
| SPAC30D11.08c | SPBC146.09c  | 0.4675973 | Novel | YES | YES | YES | YES |
| SPAC11H11.06  | SPAPB2B4.03  | 0.4674693 | Novel | NO  | NO  | NO  | NO  |
| SPAC222.18    | SPAC16.02c   | 0.4672971 | Novel | NO  | YES | NO  | NO  |
| SPAC19G12.14  | SPBC776.02c  | 0.4671328 | Novel | NO  | NO  | NO  | YES |
| SPAC18B11.10  | SPBC354.03   | 0.4670639 | Novel | YES | NO  | NO  | NO  |
| SPCC1739.12   | SPBC19F8.07  | 0.4669381 | Novel | NO  | NO  | NO  | NO  |
| SPCC18B5.03   | SPAC9G1.02   | 0.4668625 | Novel | NO  | YES | NO  | YES |
| SPAC1D4.06c   | SPAC2F3.15   | 0.4668079 | Novel | NO  | YES | NO  | NO  |
| SPAC16.01     | SPBC19F8.07  | 0.4666585 | Novel | NO  | NO  | NO  | NO  |
| SPAC144.13c   | SPCC1795.01c | 0.466618  | Novel | NO  | NO  | NO  | YES |
| SPCC1259.15c  | SPBC1D7.04   | 0.4665605 | Novel | NO  | NO  | NO  | NO  |
| SPCC970.10c   | SPAC30D11.13 | 0.4665527 | Novel | NO  | NO  | NO  | NO  |
| SPBC405.04c   | SPAC18G6.03  | 0.4664737 | Novel | NO  | YES | YES | NO  |
| SPBC1685.06   | SPBC11B10.09 | 0.466466  | Novel | NO  | YES | NO  | NO  |
| SPAC16.01     | SPAC1250.03  | 0.4664446 | Novel | NO  | NO  | NO  | NO  |
| SPCC645.05c   | SPBC24C6.07  | 0.4663366 | Novel | NO  | YES | NO  | YES |
| SPCC18B5.03   | SPAC1F5.09c  | 0.4662986 | Novel | NO  | YES | NO  | YES |
| SPAC23H3.04   | SPAC2F3.17c  | 0.4660981 | Novel | NO  | NO  | NO  | NO  |
| SPAC3A12.14   | SPAP8A3.08   | 0.4660869 | Novel | NO  | YES | NO  | NO  |
| SPAC30D11.13  | SPCC1919.15  | 0.4660723 | Novel | NO  | NO  | NO  | NO  |
| SPBPB8B6.04c  | SPAC144.13c  | 0.4660645 | Novel | NO  | NO  | NO  | YES |
| SPCC1259.15c  | SPAC24H6.03  | 0.4659493 | Novel | NO  | NO  | YES | NO  |
| SPCC645.05c   | SPBC32H8.12c | 0.4658727 | Novel | YES | YES | YES | YES |
| SPCC645.05c   | SPBP4H10.04  | 0.4658531 | Novel | NO  | YES | NO  | YES |
| SPAC110.03    | SPCC1259.15c | 0.465815  | Novel | NO  | NO  | NO  | NO  |
| SPCC1259.15c  | SPBC4.05     | 0.46579   | Novel | NO  | YES | YES | NO  |
| SPAC3F10.02c  | SPBC16H5.07c | 0.4655995 | Novel | NO  | NO  | NO  | NO  |
| SPCC4E9.02    | SPAC821.08c  | 0.4655941 | Novel | NO  | NO  | NO  | NO  |
| SPCC1259.15c  | SPBC26H8.07c | 0.465562  | Novel | NO  | NO  | NO  | NO  |
| SPBC106.10    | SPCC4G3.08   | 0.4654273 | Novel | NO  | YES | YES | NO  |
| SPBP16F5.07   | SPBC776.02c  | 0.4653786 | Novel | NO  | NO  | NO  | YES |
| SPBC1685.01   | SPBC776.02c  | 0.4653638 | Novel | YES | NO  | YES | YES |

|               |               |           |       |     |     |     |     |
|---------------|---------------|-----------|-------|-----|-----|-----|-----|
| SPAC24B11.11c | SPAC22H10.04  | 0.4653545 | Novel | NO  | NO  | NO  | NO  |
| SPAC30D11.13  | SPBC1734.06   | 0.4653237 | Novel | NO  | NO  | NO  | NO  |
| SPAC23H3.04   | SPBC1347.12   | 0.4652985 | Novel | NO  | NO  | NO  | NO  |
| SPAC24H6.05   | SPAC1D4.13    | 0.4651463 | Novel | NO  | YES | NO  | NO  |
| SPCC757.09c   | SPBC776.02c   | 0.4646884 | Novel | NO  | NO  | NO  | YES |
| SPBC11B10.09  | SPCC5E4.04    | 0.4645756 | Novel | NO  | YES | NO  | YES |
| SPBC582.03    | SPAC30D11.13  | 0.4645663 | Novel | NO  | YES | YES | NO  |
| SPBC1685.06   | SPAC9E9.08    | 0.4642866 | Novel | NO  | NO  | NO  | NO  |
| SPAC20G4.07c  | SPBC776.02c   | 0.4641211 | Novel | NO  | NO  | NO  | YES |
| SPBC1685.06   | SPAC1952.07   | 0.4640881 | Novel | NO  | NO  | NO  | NO  |
| SPBC2F12.09c  | SPBC11B10.09  | 0.4640502 | Novel | NO  | NO  | NO  | YES |
| SPAC24H6.05   | SPAC30D11.13  | 0.4638937 | Novel | NO  | YES | YES | NO  |
| SPBC660.14    | SPBC725.16    | 0.4637995 | Novel | NO  | NO  | NO  | YES |
| SPBC359.05    | SPAC9E9.12c   | 0.4635982 | Novel | YES | YES | NO  | NO  |
| SPAC57A10.02  | SPBC18H10.15  | 0.4635528 | Novel | NO  | YES | YES | NO  |
| SPCC16C4.11   | SPAC821.12    | 0.463387  | Novel | NO  | YES | YES | NO  |
| SPAC13D6.05   | SPBC32F12.04  | 0.4633844 | Novel | NO  | NO  | NO  | YES |
| SPBC800.05c   | SPAC11E3.04c  | 0.4630972 | Novel | NO  | NO  | NO  | NO  |
| SPAC24B11.06c | SPBC4C3.12    | 0.4630247 | Novel | NO  | NO  | NO  | YES |
| SPBC11B10.09  | SPCC4F11.02   | 0.4629431 | Novel | NO  | NO  | NO  | YES |
| SPBC12D12.07c | SPAC20H4.11c  | 0.4628968 | Novel | NO  | NO  | NO  | NO  |
| SPAC23H3.04   | SPCC188.12    | 0.4628354 | Novel | NO  | NO  | YES | NO  |
| SPCC338.05c   | SPAC1250.03   | 0.4627451 | Novel | NO  | YES | YES | NO  |
| SPCC5E4.03c   | SPBC1105.09   | 0.4623582 | Novel | NO  | NO  | NO  | NO  |
| SPBC1685.06   | SPAC14C4.13   | 0.4620926 | Novel | NO  | YES | NO  | NO  |
| SPBC336.04    | SPBC18H10.15  | 0.4619986 | Novel | NO  | NO  | NO  | NO  |
| SPAC24B11.06c | SPAC2F3.15    | 0.4617833 | Novel | NO  | YES | NO  | NO  |
| SPBC21.06c    | SPCC31H12.05c | 0.4617361 | Novel | NO  | NO  | NO  | NO  |
| SPAC24B11.06c | SPAC19E9.02   | 0.4615371 | Novel | NO  | YES | YES | YES |
| SPAPB2B4.03   | SPBC119.02    | 0.4614955 | Novel | NO  | NO  | NO  | NO  |
| SPBC12D12.08c | SPAC11G7.04   | 0.4612036 | Novel | NO  | NO  | NO  | NO  |
| SPAC1805.12c  | SPBC12D12.08c | 0.4612036 | Novel | NO  | NO  | NO  | NO  |
| SPAC22H10.04  | SPAC3F10.02c  | 0.4611931 | Novel | NO  | NO  | NO  | NO  |
| SPBC1198.09   | SPBC26H8.07c  | 0.461026  | Novel | NO  | NO  | NO  | NO  |
| SPAC24H6.03   | SPBC1198.09   | 0.4609837 | Novel | NO  | NO  | NO  | NO  |
| SPAC22E12.14c | SPCC24B10.07  | 0.4608207 | Novel | NO  | YES | YES | NO  |
| SPAC110.03    | SPBC1198.09   | 0.4607469 | Novel | NO  | NO  | NO  | NO  |
| SPBC4.05      | SPBC1198.09   | 0.4606726 | Novel | NO  | YES | NO  | NO  |
| SPCC794.03    | SPCC965.13    | 0.4605276 | Novel | NO  | NO  | NO  | NO  |
| SPAC3A12.14   | SPBC11C11.02  | 0.4604894 | Novel | NO  | YES | NO  | NO  |
| SPAC821.12    | SPAC664.07c   | 0.4604859 | Novel | NO  | YES | NO  | NO  |
| SPBC1198.09   | SPBC1D7.04    | 0.4604413 | Novel | NO  | NO  | NO  | NO  |
| SPAC24B11.06c | SPCC1739.11c  | 0.4603727 | Novel | YES | YES | YES | YES |
| SPAC1B9.02c   | SPCC24B10.07  | 0.4602202 | Novel | NO  | YES | YES | NO  |
| SPAC31G5.09c  | SPAC23C11.16  | 0.4601181 | Novel | NO  | YES | YES | NO  |
| SPAC57A7.08   | SPAC1687.15   | 0.4599459 | Novel | NO  | NO  | YES | NO  |
| SPBC1685.06   | SPAC664.07c   | 0.4599412 | Novel | NO  | NO  | NO  | NO  |

|               |               |           |       |     |     |     |     |
|---------------|---------------|-----------|-------|-----|-----|-----|-----|
| SPAC1F7.04    | SPBC16C6.07c  | 0.4598641 | Novel | NO  | NO  | NO  | NO  |
| SPAC19D5.01   | SPBC18H10.15  | 0.4596596 | Novel | NO  | NO  | NO  | NO  |
| SPCC4E9.02    | SPAC22F3.09c  | 0.4595999 | Novel | NO  | NO  | NO  | NO  |
| SPBC1685.06   | SPAC8E11.02c  | 0.4593652 | Novel | NO  | NO  | NO  | NO  |
| SPBC19G7.05c  | SPAC821.12    | 0.4593203 | Novel | NO  | NO  | YES | NO  |
| SPBC1685.06   | SPAC17A2.13c  | 0.4590961 | Novel | NO  | NO  | NO  | NO  |
| SPBC354.03    | SPAC630.14c   | 0.4588958 | Novel | YES | NO  | NO  | NO  |
| SPBC337.08c   | SPBC29B5.01   | 0.4588766 | Novel | NO  | NO  | NO  | YES |
| SPBC11B10.09  | SPAC23H4.17c  | 0.4587789 | Novel | NO  | YES | YES | NO  |
| SPCC4E9.02    | SPBC19C2.05   | 0.4587113 | Novel | NO  | NO  | NO  | NO  |
| SPBC18H10.15  | SPBC887.10    | 0.4585784 | Novel | NO  | NO  | NO  | NO  |
| SPAC821.09    | SPAC821.12    | 0.4585624 | Novel | NO  | NO  | NO  | NO  |
| SPBC11B10.09  | SPAC17A2.09c  | 0.4585187 | Novel | NO  | NO  | NO  | YES |
| SPAC1D4.13    | SPAC2C4.14c   | 0.4584436 | Novel | NO  | YES | YES | NO  |
| SPCC16C4.11   | SPAC16.01     | 0.4584403 | Novel | NO  | YES | NO  | NO  |
| SPCC18B5.03   | SPAC10F6.02c  | 0.4580856 | Novel | NO  | YES | NO  | NO  |
| SPAC8E11.02c  | SPAC10F6.02c  | 0.4577755 | Novel | NO  | NO  | NO  | NO  |
| SPBC428.16c   | SPBC19C2.05   | 0.4575108 | Novel | NO  | YES | YES | YES |
| SPAC1F7.04    | SPBC19F8.07   | 0.4572007 | Novel | NO  | NO  | NO  | NO  |
| SPBC1685.06   | SPAC57A7.04c  | 0.4571968 | Novel | NO  | NO  | NO  | NO  |
| SPBC543.07    | SPCC24B10.07  | 0.4569662 | Novel | NO  | YES | YES | NO  |
| SPBC16A3.15c  | SPAC11E3.04c  | 0.4569554 | Novel | NO  | NO  | NO  | NO  |
| SPAC24B11.06c | SPAC19E9.03   | 0.4568878 | Novel | NO  | YES | NO  | YES |
| SPAC2F3.15    | SPBC1604.14c  | 0.4568195 | Novel | NO  | YES | NO  | NO  |
| SPAC10F6.02c  | SPAC23C11.11  | 0.4568023 | Novel | NO  | YES | NO  | NO  |
| SPAC23H3.04   | SPAPB18E9.04c | 0.4565788 | Novel | NO  | NO  | YES | NO  |
| SPBC21.06c    | SPAC823.15    | 0.4565445 | Novel | NO  | NO  | NO  | YES |
| SPBC409.07c   | SPAC9G1.09    | 0.4564695 | Novel | NO  | YES | YES | YES |
| SPBC9B6.10    | SPBC18H10.15  | 0.456246  | Novel | NO  | NO  | NO  | NO  |
| SPBC1A4.02c   | SPBC11B10.09  | 0.456017  | Novel | NO  | NO  | NO  | YES |
| SPAC24B11.06c | SPBP16F5.02   | 0.4560056 | Novel | NO  | YES | NO  | YES |
| SPAC21E11.03c | SPAC22F3.02   | 0.4559903 | Novel | NO  | YES | YES | YES |
| SPAC823.15    | SPBC19F8.07   | 0.4556744 | Novel | NO  | NO  | NO  | NO  |
| SPAC926.04c   | SPBC1685.06   | 0.4556526 | Novel | NO  | YES | NO  | NO  |
| SPBC1685.06   | SPAC9G1.05    | 0.4556441 | Novel | NO  | NO  | NO  | NO  |
| SPBP19A11.03c | SPBC337.08c   | 0.4555564 | Novel | NO  | NO  | NO  | YES |
| SPCC16C4.11   | SPBC32C12.02  | 0.455527  | Novel | NO  | NO  | NO  | NO  |
| SPBC32F12.04  | SPAC2F7.03c   | 0.4553676 | Novel | NO  | NO  | NO  | YES |
| SPCC4E9.02    | SPBC16E9.17c  | 0.4551455 | Novel | NO  | YES | YES | NO  |
| SPAC20H4.09   | SPAC17A2.13c  | 0.4551285 | Novel | NO  | NO  | NO  | NO  |
| SPAC23H3.04   | SPBC16E9.11c  | 0.4550118 | Novel | NO  | NO  | NO  | NO  |
| SPCC1223.06   | SPAC2C4.14c   | 0.4550021 | Novel | YES | NO  | NO  | NO  |
| SPBC11B10.09  | SPBC14F5.08   | 0.4548395 | Novel | NO  | NO  | NO  | NO  |
| SPAC821.12    | SPBC244.01c   | 0.4547443 | Novel | NO  | YES | NO  | NO  |
| SPCC736.14    | SPBC800.05c   | 0.4546256 | Novel | NO  | NO  | NO  | YES |
| SPAC2F3.15    | SPBC19F8.07   | 0.4544668 | Novel | NO  | YES | YES | NO  |
| SPBP8B7.16c   | SPCC1259.13   | 0.4543897 | Novel | YES | YES | NO  | NO  |

|               |               |           |       |     |     |     |     |
|---------------|---------------|-----------|-------|-----|-----|-----|-----|
| SPBC16A3.15c  | SPCC736.14    | 0.4541816 | Novel | NO  | NO  | NO  | YES |
| SPAC637.10c   | SPBC337.08c   | 0.4537461 | Novel | NO  | NO  | NO  | YES |
| SPBC19C7.03   | SPCC320.13c   | 0.4535622 | Novel | NO  | YES | NO  | NO  |
| SPBC1105.09   | SPBC15D4.14   | 0.4535595 | Novel | NO  | NO  | NO  | NO  |
| SPBP8B7.16c   | SPCC16A11.17  | 0.4533413 | Novel | NO  | YES | NO  | NO  |
| SPBC19F8.01c  | SPAC4F10.11   | 0.4532138 | Novel | YES | YES | NO  | NO  |
| SPBC1105.09   | SPAC6F12.15c  | 0.4531276 | Novel | NO  | NO  | YES | NO  |
| SPAC24B11.06c | SPAC23H4.17c  | 0.4530986 | Novel | NO  | YES | YES | NO  |
| SPAC8E11.02c  | SPCC320.13c   | 0.4530568 | Novel | YES | YES | NO  | YES |
| SPAC18G6.03   | SPAC607.09c   | 0.4529824 | Novel | YES | NO  | NO  | NO  |
| SPCC4E9.02    | SPBC19C2.01   | 0.4529221 | Novel | NO  | NO  | NO  | NO  |
| SPAC1D4.13    | SPBC18H10.15  | 0.452782  | Novel | NO  | YES | YES | NO  |
| SPCC31H12.05c | SPCC1739.11c  | 0.4527114 | Novel | NO  | NO  | NO  | NO  |
| SPAC821.12    | SPCC1739.11c  | 0.4526684 | Novel | NO  | YES | NO  | NO  |
| SPAC24B11.06c | SPBC32F12.06  | 0.4525941 | Novel | NO  | YES | NO  | YES |
| SPAPB18E9.04c | SPAC20H4.11c  | 0.4525859 | Novel | NO  | NO  | NO  | NO  |
| SPBC19F8.01c  | SPAC9G1.11c   | 0.4525666 | Novel | YES | YES | NO  | NO  |
| SPBC119.08    | SPBC106.10    | 0.4525088 | Novel | YES | YES | YES | NO  |
| SPCC16C4.11   | SPBC19C7.03   | 0.4524139 | Novel | NO  | YES | NO  | NO  |
| SPBC19F8.01c  | SPBC16A3.01   | 0.4524098 | Novel | YES | YES | NO  | NO  |
| SPAC24H6.05   | SPAC9G1.02    | 0.4523171 | Novel | YES | NO  | YES | YES |
| SPAC823.15    | SPAC1F3.02c   | 0.4522428 | Novel | NO  | NO  | NO  | NO  |
| SPBP8B7.16c   | SPBC11B10.09  | 0.4522145 | Novel | NO  | YES | NO  | NO  |
| SPBC11B10.09  | SPAC11G7.02   | 0.4520784 | Novel | NO  | NO  | NO  | YES |
| SPCC4E9.02    | SPAC644.06c   | 0.4520246 | Novel | NO  | NO  | NO  | NO  |
| SPCC4E9.02    | SPBC336.12c   | 0.4519324 | Novel | NO  | NO  | NO  | NO  |
| SPBC30D10.10c | SPAC821.08c   | 0.4519262 | Novel | NO  | NO  | NO  | NO  |
| SPBC11B10.09  | SPAC1805.17   | 0.451855  | Novel | NO  | NO  | NO  | YES |
| SPCC4E9.02    | SPAC57A10.02  | 0.4518231 | Novel | NO  | NO  | YES | NO  |
| SPBC18H10.15  | SPAC821.04c   | 0.4514469 | Novel | NO  | YES | NO  | NO  |
| SPCC4E9.02    | SPBC725.16    | 0.4513215 | Novel | NO  | NO  | NO  | NO  |
| SPCC1739.11c  | SPAC23H4.17c  | 0.4509773 | Novel | NO  | NO  | NO  | NO  |
| SPCC1259.15c  | SPCC338.05c   | 0.4509554 | Novel | NO  | YES | YES | NO  |
| SPBC582.03    | SPAC10F6.02c  | 0.4509471 | Novel | NO  | NO  | NO  | NO  |
| SPAC821.12    | SPBP4H10.04   | 0.4509222 | Novel | NO  | NO  | YES | NO  |
| SPCC16C4.11   | SPBC19C2.05   | 0.4508774 | Novel | NO  | YES | YES | NO  |
| SPBC543.07    | SPAC22H10.04  | 0.4508035 | Novel | YES | NO  | NO  | NO  |
| SPAC821.12    | SPAC6F6.08c   | 0.450746  | Novel | NO  | YES | NO  | NO  |
| SPCC18B5.03   | SPAC23H4.17c  | 0.450713  | Novel | NO  | YES | NO  | NO  |
| SPBC4.05      | SPBP16F5.04   | 0.4504938 | Novel | NO  | YES | NO  | NO  |
| SPAC16A10.04  | SPAC23C4.08   | 0.4504441 | Novel | NO  | YES | YES | YES |
| SPBC18H10.15  | SPBC342.05    | 0.4503739 | Novel | NO  | NO  | NO  | NO  |
| SPBC13G1.10c  | SPAC644.12    | 0.450361  | Novel | NO  | NO  | NO  | NO  |
| SPAPYUG7.02c  | SPBC11B10.09  | 0.4500746 | Novel | NO  | YES | NO  | YES |
| SPAC31G5.09c  | SPAC22H10.04  | 0.4500708 | Novel | NO  | NO  | NO  | NO  |
| SPAC16.01     | SPAPB18E9.04c | 0.450018  | Novel | NO  | NO  | NO  | NO  |
| SPAC821.12    | SPAC1782.09c  | 0.4499743 | Novel | NO  | YES | NO  | NO  |



|               |               |           |       |     |     |     |     |
|---------------|---------------|-----------|-------|-----|-----|-----|-----|
| SPBC19C7.03   | SPAC1D4.13    | 0.4497806 | Novel | NO  | YES | NO  | YES |
| SPBC1703.10   | SPAC9E9.07c   | 0.4495856 | Novel | NO  | YES | YES | NO  |
| SPAC6F6.15    | SPAC9E9.07c   | 0.4495281 | Novel | NO  | YES | YES | NO  |
| SPAC23E2.02   | SPCC4G3.07c   | 0.4494919 | Novel | YES | YES | YES | YES |
| SPBC1D7.04    | SPBP16F5.04   | 0.4493575 | Novel | NO  | NO  | NO  | NO  |
| SPAC31G5.09c  | SPAC1782.09c  | 0.4493476 | Novel | NO  | NO  | NO  | NO  |
| SPBC16A3.05c  | SPCC417.08    | 0.4492761 | Novel | NO  | NO  | NO  | NO  |
| SPAC24H6.03   | SPBP16F5.04   | 0.4491217 | Novel | NO  | NO  | NO  | NO  |
| SPAC110.03    | SPBP16F5.04   | 0.4490189 | Novel | NO  | NO  | NO  | NO  |
| SPAC1F7.04    | SPCC24B10.07  | 0.4489021 | Novel | NO  | YES | NO  | NO  |
| SPBC26H8.07c  | SPBP16F5.04   | 0.4489003 | Novel | NO  | NO  | NO  | NO  |
| SPAC24B11.06c | SPAPB2B4.03   | 0.4487168 | Novel | NO  | YES | NO  | YES |
| SPAC1F7.04    | SPAPB18E9.04c | 0.4487101 | Novel | NO  | NO  | NO  | NO  |
| SPAC23H3.04   | SPAC5H10.11   | 0.4486182 | Novel | YES | NO  | NO  | NO  |
| SPBC16H5.07c  | SPBC19F8.07   | 0.448542  | Novel | YES | NO  | NO  | YES |
| SPAC24H6.05   | SPBC8D2.01    | 0.4484187 | Novel | YES | NO  | NO  | NO  |
| SPAC821.12    | SPAC1F7.04    | 0.448051  | Novel | NO  | YES | YES | YES |
| SPBC11B10.09  | SPAC1687.15   | 0.447832  | Novel | NO  | YES | YES | NO  |
| SPAC57A7.08   | SPBC19F8.07   | 0.4477912 | Novel | YES | NO  | NO  | NO  |
| SPBC800.05c   | SPAC18B11.07c | 0.4477097 | Novel | NO  | NO  | NO  | NO  |
| SPAC16A10.04  | SPAC24B11.06c | 0.4476449 | Novel | NO  | NO  | YES | NO  |
| SPAC1783.07c  | SPBC11B10.09  | 0.4475954 | Novel | NO  | NO  | NO  | YES |
| SPBC32F12.09  | SPAC821.12    | 0.4473618 | Novel | NO  | NO  | YES | NO  |
| SPCC16C4.09   | SPAC1D4.13    | 0.4473009 | Novel | NO  | NO  | NO  | NO  |
| SPAC1D4.13    | SPCC5E4.04    | 0.4472187 | Novel | NO  | YES | NO  | NO  |
| SPAC16A10.04  | SPAPB15E9.01c | 0.4471218 | Novel | NO  | NO  | NO  | NO  |
| SPAC19G12.06c | SPBC119.14    | 0.4467076 | Novel | NO  | NO  | NO  | YES |
| SPCC622.08c   | SPBC119.14    | 0.4467015 | Novel | NO  | NO  | NO  | YES |
| SPCC16C4.11   | SPCC4F11.02   | 0.4466407 | Novel | NO  | NO  | NO  | NO  |
| SPAC1D4.13    | SPAC630.14c   | 0.4465433 | Novel | NO  | YES | NO  | NO  |
| SPAC16A10.07c | SPAC637.12c   | 0.4465125 | Novel | NO  | YES | YES | NO  |
| SPAC607.09c   | SPBC1703.10   | 0.4465027 | Novel | NO  | NO  | NO  | NO  |
| SPCC297.03    | SPCC16C4.11   | 0.4464725 | Novel | NO  | YES | YES | NO  |
| SPAC24H6.05   | SPBP8B7.16c   | 0.4464615 | Novel | YES | NO  | NO  | NO  |
| SPAC16.01     | SPCC24B10.07  | 0.4464088 | Novel | NO  | YES | NO  | NO  |
| SPBC11B10.09  | SPAC17G8.14c  | 0.4463958 | Novel | NO  | YES | YES | NO  |
| SPAC664.07c   | SPBC119.14    | 0.4462531 | Novel | NO  | YES | NO  | YES |
| SPAC821.12    | SPCC188.02    | 0.4462214 | Novel | NO  | NO  | NO  | NO  |
| SPAC18B11.10  | SPAC1D4.13    | 0.4456399 | Novel | NO  | YES | NO  | NO  |
| SPCC417.08    | SPAC3G6.02    | 0.4456375 | Novel | NO  | NO  | NO  | NO  |
| SPBC18H10.15  | SPBC685.09    | 0.4455012 | Novel | NO  | NO  | NO  | NO  |
| SPAC16.01     | SPBC1D7.05    | 0.4453643 | Novel | NO  | YES | NO  | NO  |
| SPAC1F3.02c   | SPAC2C4.14c   | 0.4453474 | Novel | YES | YES | YES | NO  |
| SPBC12D12.07c | SPAC16.01     | 0.4453472 | Novel | NO  | NO  | NO  | NO  |
| SPCC4E9.02    | SPAC2G11.12   | 0.4453164 | Novel | NO  | NO  | NO  | NO  |
| SPCC31H12.05c | SPAC1F3.02c   | 0.4453159 | Novel | NO  | NO  | NO  | NO  |
| SPAC1D4.13    | SPAC2F3.15    | 0.4452875 | Novel | NO  | YES | NO  | NO  |

|               |               |           |       |     |     |     |     |
|---------------|---------------|-----------|-------|-----|-----|-----|-----|
| SPAC821.12    | SPAC23C4.08   | 0.4452808 | Novel | NO  | YES | YES | NO  |
| SPCC4E9.02    | SPBC646.09c   | 0.4452722 | Novel | NO  | NO  | NO  | NO  |
| SPCC4E9.02    | SPAC17C9.01c  | 0.4452458 | Novel | NO  | NO  | NO  | NO  |
| SPCC4E9.02    | SPBC25B2.05   | 0.4451086 | Novel | NO  | NO  | NO  | NO  |
| SPBP4H10.04   | SPCC320.13c   | 0.4450698 | Novel | NO  | NO  | NO  | NO  |
| SPBC21.06c    | SPBC16H5.07c  | 0.444994  | Novel | NO  | NO  | NO  | YES |
| SPCC4E9.02    | SPAC6F12.15c  | 0.4449441 | Novel | NO  | NO  | NO  | NO  |
| SPCC24B10.07  | SPBP4H10.04   | 0.4449336 | Novel | NO  | NO  | NO  | NO  |
| SPAC20H4.11c  | SPBC19F8.07   | 0.4448738 | Novel | NO  | NO  | NO  | NO  |
| SPCC4E9.02    | SPBP16F5.02   | 0.4448278 | Novel | NO  | NO  | YES | NO  |
| SPCC4E9.02    | SPAC18B11.07c | 0.4447888 | Novel | NO  | NO  | NO  | NO  |
| SPBC16G5.12c  | SPCC4E9.02    | 0.4447041 | Novel | NO  | NO  | NO  | NO  |
| SPAC15A10.03c | SPBC18H10.15  | 0.4445895 | Novel | NO  | YES | NO  | NO  |
| SPCC4E9.02    | SPAC9E9.13    | 0.4445805 | Novel | NO  | NO  | YES | NO  |
| SPACUNK12.02c | SPAC17A2.13c  | 0.4445509 | Novel | NO  | NO  | NO  | NO  |
| SPBC18H10.15  | SPAC821.08c   | 0.4445038 | Novel | NO  | NO  | NO  | NO  |
| SPCC4E9.02    | SPBC32H8.12c  | 0.4443026 | Novel | NO  | NO  | NO  | NO  |
| SPBC18H10.15  | SPBC14C8.07c  | 0.4442033 | Novel | NO  | YES | NO  | NO  |
| SPAC17H9.09c  | SPBC16C6.07c  | 0.4441289 | Novel | NO  | NO  | NO  | NO  |
| SPAC24H6.05   | SPAC1F5.09c   | 0.4440634 | Novel | NO  | YES | NO  | YES |
| SPAC57A7.08   | SPBC8D2.01    | 0.4440329 | Novel | YES | NO  | YES | NO  |
| SPBC725.16    | SPBC16A3.11   | 0.4439158 | Novel | NO  | NO  | NO  | YES |
| SPBC18H10.15  | SPBC646.13    | 0.4438076 | Novel | NO  | NO  | NO  | NO  |
| SPAC821.12    | SPBC11B10.09  | 0.4436531 | Novel | NO  | YES | YES | YES |
| SPAC19G12.01c | SPAC821.08c   | 0.4436065 | Novel | YES | YES | NO  | YES |
| SPCC338.17c   | SPBC119.14    | 0.4435084 | Novel | NO  | YES | YES | YES |
| SPCC4E9.02    | SPCC18B5.03   | 0.4434879 | Novel | NO  | NO  | YES | NO  |
| SPBC6B1.07    | SPBC13G1.10c  | 0.4432548 | Novel | NO  | NO  | NO  | NO  |
| SPCC24B10.07  | SPAC20H4.11c  | 0.4432547 | Novel | NO  | NO  | NO  | NO  |
| SPBC23G7.12c  | SPBC887.04c   | 0.4431211 | Novel | NO  | NO  | NO  | NO  |
| SPAC9E9.07c   | SPAC17G6.04c  | 0.4430848 | Novel | NO  | NO  | NO  | NO  |
| SPAC11E3.09   | SPBC18H10.15  | 0.4428723 | Novel | NO  | NO  | NO  | NO  |
| SPAC821.12    | SPAC20H4.11c  | 0.4427993 | Novel | NO  | NO  | NO  | NO  |
| SPAC1420.02c  | SPAC17H9.19c  | 0.44279   | Novel | NO  | NO  | NO  | NO  |
| SPCC16C4.11   | SPAC17G8.14c  | 0.4426899 | Novel | NO  | YES | YES | NO  |
| SPAC144.13c   | SPBC725.16    | 0.4426787 | Novel | NO  | NO  | NO  | YES |
| SPAC110.03    | SPCC24B10.07  | 0.4425959 | Novel | NO  | YES | NO  | NO  |
| SPAC823.15    | SPAC1565.06c  | 0.4425544 | Novel | NO  | NO  | NO  | YES |
| SPBC4F6.18c   | SPBC11C11.04c | 0.4425066 | Novel | NO  | NO  | NO  | NO  |
| SPCC16C4.11   | SPACUNK12.02c | 0.4424262 | Novel | NO  | YES | YES | NO  |
| SPBC776.12c   | SPAC1B2.05    | 0.4423511 | Novel | NO  | YES | YES | YES |
| SPBC8D2.01    | SPBP4H10.04   | 0.4422443 | Novel | NO  | NO  | YES | NO  |
| SPBC11B10.09  | SPBC106.10    | 0.4422199 | Novel | NO  | YES | YES | NO  |
| SPBC2F12.13   | SPAC1F5.09c   | 0.4421378 | Novel | NO  | YES | NO  | YES |
| SPAC9G1.09    | SPBC21D10.12  | 0.4421166 | Novel | NO  | YES | NO  | NO  |
| SPACUNK12.02c | SPAC1952.07   | 0.4419762 | Novel | NO  | NO  | NO  | NO  |
| SPBP8B7.16c   | SPBC4.04c     | 0.4419575 | Novel | YES | YES | NO  | NO  |

|               |               |           |       |     |     |     |     |
|---------------|---------------|-----------|-------|-----|-----|-----|-----|
| SPCC576.15c   | SPCC4G3.08    | 0.4418371 | Novel | NO  | YES | YES | NO  |
| SPAC16A10.04  | SPAC821.12    | 0.4418358 | Novel | NO  | NO  | NO  | NO  |
| SPBC16A3.15c  | SPAC18B11.07c | 0.441757  | Novel | NO  | NO  | NO  | NO  |
| SPAC823.15    | SPCC1739.11c  | 0.4416549 | Novel | NO  | NO  | NO  | YES |
| SPAC23C4.08   | SPAC2C4.14c   | 0.4414657 | Novel | NO  | NO  | NO  | NO  |
| SPAC630.03    | SPAC4A8.15c   | 0.4414488 | Novel | YES | NO  | YES | YES |
| SPAC644.12    | SPCP31B10.07  | 0.44142   | Novel | NO  | NO  | NO  | NO  |
| SPAC513.01c   | SPAC644.12    | 0.44142   | Novel | NO  | NO  | NO  | NO  |
| SPBC6B1.07    | SPCP31B10.07  | 0.4413624 | Novel | NO  | NO  | NO  | NO  |
| SPAC513.01c   | SPBC6B1.07    | 0.4413624 | Novel | NO  | NO  | NO  | NO  |
| SPAC24C9.07c  | SPAC23H3.04   | 0.4413405 | Novel | YES | NO  | NO  | NO  |
| SPCC1223.06   | SPAC1F5.09c   | 0.4413167 | Novel | NO  | YES | NO  | YES |
| SPCC16C4.11   | SPAC1F7.04    | 0.4412822 | Novel | NO  | YES | NO  | NO  |
| SPAC4G9.08c   | SPBC14F5.08   | 0.4410665 | Novel | NO  | NO  | NO  | NO  |
| SPBP8B7.16c   | SPBC6B1.07    | 0.4410623 | Novel | NO  | NO  | NO  | NO  |
| SPBC23G7.12c  | SPCC5E4.04    | 0.441014  | Novel | NO  | NO  | NO  | NO  |
| SPCC4E9.02    | SPAC24H6.05   | 0.440882  | Novel | NO  | NO  | YES | NO  |
| SPBC119.14    | SPAC2G11.12   | 0.440864  | Novel | NO  | YES | YES | YES |
| SPAC144.13c   | SPBC18H10.15  | 0.4406873 | Novel | NO  | NO  | NO  | NO  |
| SPCC16C4.11   | SPBC1A4.02c   | 0.4404782 | Novel | NO  | NO  | NO  | NO  |
| SPAC16.01     | SPCC1682.16   | 0.440327  | Novel | NO  | NO  | NO  | NO  |
| SPBC428.16c   | SPBC2F12.13   | 0.4403029 | Novel | NO  | YES | NO  | NO  |
| SPBC4F6.15c   | SPBC119.14    | 0.4402556 | Novel | NO  | NO  | NO  | YES |
| SPAC29B12.02c | SPAC4G9.08c   | 0.4402263 | Novel | NO  | NO  | NO  | NO  |
| SPAC18G6.03   | SPAC823.15    | 0.4402122 | Novel | NO  | NO  | NO  | NO  |
| SPAC343.09    | SPBC23G7.12c  | 0.4402107 | Novel | NO  | NO  | NO  | NO  |
| SPBC23G7.12c  | SPAC2C4.15c   | 0.4401042 | Novel | NO  | NO  | YES | NO  |
| SPCC4E9.02    | SPAC19E9.03   | 0.4400961 | Novel | NO  | YES | YES | NO  |
| SPAC821.12    | SPBC1718.07c  | 0.4399943 | Novel | NO  | YES | NO  | NO  |
| SPAC1556.01c  | SPBC119.14    | 0.439937  | Novel | NO  | NO  | YES | YES |
| SPBC23G7.12c  | SPBC14C8.01c  | 0.4398918 | Novel | NO  | NO  | NO  | NO  |
| SPCC4E9.02    | SPBC16A3.11   | 0.4398765 | Novel | NO  | NO  | NO  | NO  |
| SPAC3G9.07c   | SPAC9E9.10c   | 0.4398734 | Novel | NO  | NO  | YES | NO  |
| SPBC11B10.09  | SPBC8D2.19    | 0.4397749 | Novel | NO  | YES | YES | NO  |
| SPAC4G9.08c   | SPCC1442.10c  | 0.4397717 | Novel | NO  | YES | NO  | NO  |
| SPAC22E12.07  | SPCC1235.05c  | 0.4397497 | Novel | NO  | NO  | NO  | NO  |
| SPAC6F6.08c   | SPCC320.13c   | 0.4395833 | Novel | NO  | YES | YES | YES |
| SPCC18B5.03   | SPBC725.16    | 0.439558  | Novel | NO  | NO  | NO  | YES |
| SPCC4E9.02    | SPBC2F12.11c  | 0.4394444 | Novel | NO  | NO  | NO  | NO  |
| SPBC119.14    | SPBC342.05    | 0.4393752 | Novel | NO  | YES | NO  | YES |
| SPAC4G9.08c   | SPAC23C4.15   | 0.4393566 | Novel | YES | YES | YES | NO  |
| SPAC1D4.06c   | SPAC23H4.17c  | 0.4393069 | Novel | NO  | YES | YES | NO  |
| SPAC664.01c   | SPAC637.12c   | 0.4392985 | Novel | NO  | YES | YES | NO  |
| SPBC428.16c   | SPAC17G6.04c  | 0.4392446 | Novel | NO  | NO  | NO  | YES |
| SPAC15A10.03c | SPBC119.14    | 0.4392223 | Novel | NO  | NO  | YES | YES |
| SPCC1020.04c  | SPAC4G9.08c   | 0.4392018 | Novel | YES | YES | YES | NO  |
| SPAC821.12    | SPBC4C3.12    | 0.4391753 | Novel | NO  | NO  | YES | NO  |

|               |               |           |       |     |     |     |     |
|---------------|---------------|-----------|-------|-----|-----|-----|-----|
| SPACUNK4.06c  | SPAC4G9.08c   | 0.4390263 | Novel | NO  | YES | NO  | NO  |
| SPBC18H10.15  | SPAC22F3.09c  | 0.4389955 | Novel | NO  | NO  | NO  | NO  |
| SPAC3A12.07   | SPAC4G9.08c   | 0.4389096 | Novel | NO  | YES | NO  | NO  |
| SPBC336.12c   | SPBC18H10.15  | 0.4386297 | Novel | NO  | NO  | NO  | NO  |
| SPAC11E3.04c  | SPAC23C4.08   | 0.4386097 | Novel | NO  | YES | NO  | NO  |
| SPBC18H10.15  | SPBC776.02c   | 0.438603  | Novel | NO  | NO  | NO  | NO  |
| SPAC823.15    | SPCC830.06    | 0.4384205 | Novel | NO  | NO  | YES | NO  |
| SPAC24B11.06c | SPBC24C6.07   | 0.4383381 | Novel | NO  | YES | YES | NO  |
| SPCC4G3.05c   | SPBC119.14    | 0.438209  | Novel | NO  | YES | YES | YES |
| SPAC1B9.02c   | SPCC320.13c   | 0.4381946 | Novel | NO  | YES | NO  | NO  |
| SPAC19B12.05c | SPAC4G9.08c   | 0.4380925 | Novel | NO  | NO  | NO  | NO  |
| SPBC19F8.07   | SPAC23H4.17c  | 0.4380298 | Novel | NO  | YES | YES | NO  |
| SPAC24B11.06c | SPBC26H8.05c  | 0.4379755 | Novel | NO  | NO  | NO  | NO  |
| SPAC4H3.05    | SPBC119.14    | 0.4379746 | Novel | NO  | NO  | NO  | YES |
| SPCC1672.08c  | SPAC4G9.08c   | 0.4379535 | Novel | NO  | YES | NO  | NO  |
| SPBC119.14    | SPBC543.03c   | 0.4379497 | Novel | NO  | NO  | NO  | YES |
| SPCC970.07c   | SPAC6G10.11c  | 0.437923  | Novel | YES | NO  | NO  | NO  |
| SPCC970.07c   | SPAC589.10c   | 0.437923  | Novel | YES | NO  | NO  | NO  |
| SPAC16A10.07c | SPBC119.14    | 0.4378838 | Novel | NO  | YES | YES | YES |
| SPBC119.14    | SPAC1687.05   | 0.437833  | Novel | NO  | NO  | NO  | YES |
| SPBC543.07    | SPBC26H8.05c  | 0.4378313 | Novel | NO  | NO  | NO  | NO  |
| SPBC336.01    | SPBC119.14    | 0.4378307 | Novel | NO  | YES | YES | YES |
| SPBC28F2.12   | SPAC4G9.08c   | 0.4377916 | Novel | NO  | YES | NO  | NO  |
| SPAC4G9.08c   | SPAC1B3.12c   | 0.4377769 | Novel | YES | YES | YES | NO  |
| SPBC18H10.15  | SPCC1322.12c  | 0.4377013 | Novel | NO  | YES | YES | NO  |
| SPAC24B11.11c | SPBC106.10    | 0.4376785 | Novel | NO  | YES | YES | NO  |
| SPBC16G5.12c  | SPBC119.14    | 0.4376366 | Novel | NO  | YES | NO  | YES |
| SPCC576.03c   | SPBC11B10.09  | 0.4375598 | Novel | NO  | YES | NO  | YES |
| SPAC3C7.03c   | SPBC119.14    | 0.4375515 | Novel | NO  | NO  | YES | YES |
| SPAC9G1.02    | SPBC1706.01   | 0.4374929 | Novel | NO  | NO  | NO  | YES |
| SPBC119.14    | SPAC30D11.13  | 0.4374177 | Novel | NO  | YES | NO  | YES |
| SPBC1921.03c  | SPCC417.08    | 0.4372577 | Novel | NO  | NO  | NO  | NO  |
| SPBC19G7.05c  | SPBC18H10.15  | 0.4372171 | Novel | NO  | NO  | NO  | NO  |
| SPBC14C8.12   | SPAC4G9.08c   | 0.4371645 | Novel | YES | YES | YES | NO  |
| SPBC13G1.11   | SPAPB1A10.10c | 0.4370727 | Novel | NO  | NO  | YES | NO  |
| SPCC970.04c   | SPAC29A4.05   | 0.4370609 | Novel | YES | YES | NO  | NO  |
| SPAC977.10    | SPBC11B10.09  | 0.4370544 | Novel | NO  | NO  | NO  | YES |
| SPAC9E9.07c   | SPAC16E8.09   | 0.4370017 | Novel | NO  | NO  | NO  | NO  |
| SPAC4A8.05c   | SPAC823.15    | 0.4367601 | Novel | NO  | NO  | NO  | NO  |
| SPAC17A2.13c  | SPCC320.13c   | 0.43667   | Novel | NO  | YES | NO  | NO  |
| SPCC1682.16   | SPAC20H4.11c  | 0.4365539 | Novel | NO  | NO  | NO  | NO  |
| SPCC16C4.11   | SPBC12D12.04c | 0.4363947 | Novel | NO  | YES | YES | NO  |
| SPAC1D4.13    | SPAC9G1.09    | 0.4363576 | Novel | NO  | YES | YES | YES |
| SPAC821.12    | SPAC16.01     | 0.4361694 | Novel | NO  | YES | YES | NO  |
| SPAPB15E9.01c | SPAC14C4.09   | 0.4360052 | Novel | YES | NO  | NO  | NO  |
| SPAC1D4.13    | SPAC1751.01c  | 0.4358349 | Novel | NO  | NO  | NO  | NO  |
| SPBC428.16c   | SPBC4.07c     | 0.4358132 | Novel | NO  | YES | NO  | NO  |

|               |               |           |       |     |     |     |     |
|---------------|---------------|-----------|-------|-----|-----|-----|-----|
| SPAC3A12.14   | SPBC4C3.12    | 0.4356361 | Novel | NO  | NO  | NO  | NO  |
| SPAC9G1.09    | SPBP19A11.04c | 0.4355602 | Novel | NO  | YES | NO  | NO  |
| SPAC6G10.11c  | SPAC17G6.12   | 0.4355533 | Novel | NO  | NO  | NO  | NO  |
| SPAC589.10c   | SPAC17G6.12   | 0.4355533 | Novel | NO  | NO  | NO  | NO  |
| SPBC19C2.03   | SPAC4G9.08c   | 0.4354672 | Novel | YES | YES | YES | NO  |
| SPCC16C4.11   | SPAC20H4.11c  | 0.4353961 | Novel | NO  | NO  | NO  | NO  |
| SPAC24H6.03   | SPAC6G10.11c  | 0.4353935 | Novel | NO  | NO  | NO  | NO  |
| SPAC24H6.03   | SPAC589.10c   | 0.4353935 | Novel | NO  | NO  | NO  | NO  |
| SPBP8B7.16c   | SPBC14C8.07c  | 0.4353523 | Novel | NO  | YES | NO  | NO  |
| SPAC1D4.13    | SPBC428.16c   | 0.4353301 | Novel | NO  | YES | NO  | NO  |
| SPAC589.10c   | SPAC17H9.19c  | 0.4352442 | Novel | NO  | NO  | NO  | NO  |
| SPAC6G10.11c  | SPAC17H9.19c  | 0.4352442 | Novel | NO  | NO  | NO  | NO  |
| SPBC21.06c    | SPCC320.13c   | 0.4352343 | Novel | NO  | YES | NO  | YES |
| SPCC338.17c   | SPAC637.12c   | 0.4352135 | Novel | NO  | YES | YES | NO  |
| SPBC3B9.11c   | SPBC725.16    | 0.4352059 | Novel | NO  | NO  | NO  | YES |
| SPBC543.07    | SPAC2C4.14c   | 0.4351437 | Novel | NO  | YES | YES | NO  |
| SPAC589.10c   | SPCC11E10.08  | 0.4351369 | Novel | NO  | NO  | NO  | NO  |
| SPAC6G10.11c  | SPCC11E10.08  | 0.4351369 | Novel | NO  | NO  | NO  | NO  |
| SPAC1D4.13    | SPBC9B6.10    | 0.4351056 | Novel | NO  | YES | NO  | NO  |
| SPAC1D4.13    | SPAC23D3.04c  | 0.4350987 | Novel | NO  | NO  | NO  | NO  |
| SPBC428.16c   | SPBC354.05c   | 0.4350192 | Novel | NO  | NO  | NO  | NO  |
| SPAC31G5.09c  | SPCC1259.13   | 0.4346928 | Novel | NO  | YES | YES | NO  |
| SPAC644.06c   | SPCC320.13c   | 0.4346275 | Novel | NO  | YES | NO  | NO  |
| SPAC24C9.15c  | SPAC4F10.11   | 0.4346217 | Novel | YES | YES | NO  | NO  |
| SPAC1D4.13    | SPCC4F11.02   | 0.4346174 | Novel | NO  | NO  | NO  | NO  |
| SPAC3A12.14   | SPAC631.01c   | 0.4345014 | Novel | NO  | NO  | NO  | NO  |
| SPAC57A7.08   | SPAC22H10.04  | 0.4344828 | Novel | YES | YES | YES | NO  |
| SPBC215.05    | SPAC1D4.13    | 0.4343581 | Novel | NO  | NO  | NO  | NO  |
| SPCC24B10.07  | SPAC1F3.02c   | 0.4343317 | Novel | NO  | YES | YES | NO  |
| SPCC18B5.11c  | SPCC16A11.17  | 0.4342251 | Novel | NO  | YES | NO  | YES |
| SPAC1D4.13    | SPAC2G11.07c  | 0.4340629 | Novel | NO  | NO  | NO  | NO  |
| SPAC9G1.11c   | SPAC24C9.15c  | 0.4340316 | Novel | YES | YES | NO  | NO  |
| SPBC11B10.09  | SPBC12D12.04c | 0.4340179 | Novel | NO  | YES | YES | NO  |
| SPAC24B11.06c | SPAC3A11.09   | 0.4340049 | Novel | NO  | NO  | NO  | NO  |
| SPAC589.02c   | SPBC11B10.09  | 0.4339364 | Novel | NO  | NO  | NO  | NO  |
| SPBC1A4.02c   | SPAC1D4.13    | 0.4337298 | Novel | NO  | NO  | NO  | NO  |
| SPAPB15E9.01c | SPAC23H3.04   | 0.4336753 | Novel | NO  | NO  | YES | NO  |
| SPBC428.16c   | SPBC1718.07c  | 0.4335963 | Novel | NO  | YES | NO  | NO  |
| SPAC1D4.04    | SPAC17H9.19c  | 0.4335849 | Novel | NO  | NO  | NO  | NO  |
| SPCC18B5.03   | SPBC1711.17   | 0.4335422 | Novel | NO  | YES | NO  | NO  |
| SPCC645.05c   | SPCC1919.10c  | 0.4335253 | Novel | NO  | YES | NO  | YES |
| SPBC18H10.15  | SPAC9E9.13    | 0.4334445 | Novel | NO  | NO  | NO  | NO  |
| SPAC821.12    | SPAC6F12.12   | 0.433432  | Novel | NO  | NO  | NO  | NO  |
| SPBC2F12.13   | SPAC9E9.07c   | 0.4331645 | Novel | NO  | NO  | NO  | NO  |
| SPCC16C4.11   | SPBC725.16    | 0.4331336 | Novel | NO  | NO  | YES | YES |
| SPAC821.12    | SPAC1006.08   | 0.4330347 | Novel | YES | NO  | NO  | NO  |
| SPAC23H3.04   | SPBC1703.10   | 0.4330143 | Novel | NO  | NO  | NO  | NO  |

|               |              |           |       |     |     |     |     |
|---------------|--------------|-----------|-------|-----|-----|-----|-----|
| SPAC637.07    | SPAC9E9.07c  | 0.4329959 | Novel | NO  | NO  | NO  | NO  |
| SPAC926.04c   | SPBC18H10.15 | 0.4329835 | Novel | NO  | YES | NO  | NO  |
| SPAC110.03    | SPBC19F8.07  | 0.432959  | Novel | NO  | NO  | NO  | NO  |
| SPCC18B5.03   | SPAC9G1.09   | 0.4329244 | Novel | NO  | YES | NO  | YES |
| SPAC1D4.06c   | SPBC119.08   | 0.4328771 | Novel | NO  | YES | YES | NO  |
| SPBC18H10.15  | SPCC1795.11  | 0.4328331 | Novel | NO  | YES | NO  | NO  |
| SPAC823.15    | SPBC24C6.07  | 0.4327508 | Novel | NO  | NO  | NO  | NO  |
| SPBC4.07c     | SPAC20H4.11c | 0.4326006 | Novel | NO  | NO  | NO  | NO  |
| SPBC428.16c   | SPBC1D7.05   | 0.4325678 | Novel | NO  | YES | NO  | NO  |
| SPBC428.16c   | SPAC1F5.09c  | 0.4324033 | Novel | NO  | YES | NO  | NO  |
| SPCC16C4.11   | SPCC4E9.02   | 0.4322125 | Novel | NO  | NO  | NO  | NO  |
| SPBC12D12.08c | SPAC6G10.11c | 0.4321387 | Novel | NO  | NO  | NO  | NO  |
| SPBC12D12.08c | SPAC589.10c  | 0.4321387 | Novel | NO  | NO  | NO  | NO  |
| SPAC16A10.04  | SPBC32F12.04 | 0.432097  | Novel | NO  | YES | NO  | NO  |
| SPBC428.16c   | SPAC16E8.09  | 0.43204   | Novel | NO  | YES | NO  | NO  |
| SPAC9G1.09    | SPAC23H4.17c | 0.4319275 | Novel | NO  | YES | YES | NO  |
| SPCC5E4.03c   | SPAC30D11.13 | 0.4318528 | Novel | NO  | YES | NO  | YES |
| SPBC1778.10c  | SPAC17G8.14c | 0.4316796 | Novel | YES | YES | YES | NO  |
| SPBC12D12.04c | SPBC1778.10c | 0.4316603 | Novel | YES | YES | YES | NO  |
| SPAC926.03    | SPAC3A12.14  | 0.4315059 | Novel | NO  | YES | NO  | NO  |
| SPAC637.12c   | SPBC776.12c  | 0.431334  | Novel | NO  | YES | YES | NO  |
| SPBC1734.14c  | SPBC18H10.15 | 0.4313142 | Novel | NO  | NO  | YES | NO  |
| SPBC428.16c   | SPAC18G6.07c | 0.4312544 | Novel | NO  | NO  | NO  | NO  |
| SPBC428.16c   | SPBC32H8.07  | 0.4311442 | Novel | NO  | NO  | NO  | NO  |
| SPAC24B11.11c | SPBC19F8.01c | 0.4311328 | Novel | NO  | NO  | NO  | NO  |
| SPAC29E6.01   | SPBC409.05   | 0.4311247 | Novel | NO  | YES | NO  | NO  |
| SPAC821.12    | SPAPYUG7.03c | 0.4311144 | Novel | NO  | NO  | NO  | NO  |
| SPCC645.05c   | SPAC821.12   | 0.4311023 | Novel | NO  | YES | NO  | NO  |
| SPAC9G1.09    | SPCC320.13c  | 0.4309945 | Novel | NO  | YES | NO  | NO  |
| SPCC16C4.11   | SPBC21.06c   | 0.4309915 | Novel | NO  | YES | YES | NO  |
| SPCC16C4.11   | SPAC8E11.02c | 0.4309009 | Novel | NO  | YES | NO  | NO  |
| SPAC19B12.03  | SPAC23H3.04  | 0.4308518 | Novel | YES | NO  | NO  | NO  |
| SPAC19G12.14  | SPAC823.15   | 0.4308103 | Novel | NO  | NO  | YES | NO  |
| SPBC428.16c   | SPBC646.09c  | 0.4307354 | Novel | NO  | YES | NO  | YES |
| SPAC4D7.05    | SPBC18H10.15 | 0.4306427 | Novel | NO  | NO  | NO  | NO  |
| SPAC24H6.09   | SPAC1F5.09c  | 0.4305775 | Novel | NO  | YES | NO  | YES |
| SPBP4H10.04   | SPAC1687.15  | 0.4305081 | Novel | NO  | NO  | YES | YES |
| SPBC21.06c    | SPBC26H8.05c | 0.430317  | Novel | NO  | NO  | NO  | NO  |
| SPAC637.07    | SPBC428.16c  | 0.4302502 | Novel | NO  | YES | NO  | NO  |
| SPAC1F7.04    | SPCC320.13c  | 0.4301978 | Novel | NO  | YES | NO  | NO  |
| SPBC409.07c   | SPBC18H10.15 | 0.4300927 | Novel | NO  | YES | YES | NO  |
| SPBC32F12.09  | SPBC18H10.15 | 0.4300917 | Novel | NO  | NO  | YES | NO  |
| SPAC17G6.12   | SPAC29E6.01  | 0.4300832 | Novel | NO  | NO  | NO  | NO  |
| SPAC4D7.05    | SPBC16C6.07c | 0.4300345 | Novel | NO  | NO  | NO  | NO  |
| SPCC16C4.07   | SPAC821.12   | 0.4300287 | Novel | NO  | NO  | NO  | NO  |
| SPBC18H10.15  | SPAC29B12.03 | 0.4299033 | Novel | NO  | NO  | NO  | NO  |
| SPCC16C4.11   | SPBC8D2.19   | 0.4298224 | Novel | NO  | YES | YES | NO  |

|               |               |           |       |     |     |     |     |
|---------------|---------------|-----------|-------|-----|-----|-----|-----|
| SPAC24C9.15c  | SPBC16A3.01   | 0.4297739 | Novel | YES | YES | NO  | NO  |
| SPBC428.16c   | SPCC1223.06   | 0.4297082 | Novel | NO  | YES | NO  | NO  |
| SPAC110.03    | SPAPB18E9.04c | 0.42967   | Novel | NO  | NO  | NO  | NO  |
| SPBC428.16c   | SPAC222.10c   | 0.4296505 | Novel | NO  | YES | NO  | NO  |
| SPBC11B10.09  | SPBC19C2.05   | 0.4296368 | Novel | NO  | YES | YES | YES |
| SPBC1711.17   | SPAC23C11.11  | 0.4296017 | Novel | NO  | YES | NO  | NO  |
| SPAC823.15    | SPBP16F5.07   | 0.4295433 | Novel | NO  | NO  | NO  | NO  |
| SPAC31G5.09c  | SPBC582.03    | 0.4295364 | Novel | NO  | NO  | NO  | NO  |
| SPCC16C4.08c  | SPAC1F5.09c   | 0.4294159 | Novel | NO  | YES | NO  | YES |
| SPAC6B12.11   | SPBC18H10.15  | 0.4293905 | Novel | NO  | NO  | NO  | NO  |
| SPBC1718.01   | SPBC18H10.15  | 0.4293183 | Novel | NO  | NO  | NO  | NO  |
| SPBC887.10    | SPAC1006.09   | 0.429133  | Novel | NO  | YES | YES | YES |
| SPAC821.12    | SPAC14C4.09   | 0.42907   | Novel | NO  | NO  | NO  | NO  |
| SPBC409.07c   | SPCC320.13c   | 0.4290082 | Novel | NO  | YES | NO  | NO  |
| SPAC29A4.02c  | SPBC18H10.15  | 0.4288546 | Novel | NO  | NO  | NO  | NO  |
| SPAC1B9.02c   | SPBC30D10.10c | 0.428803  | Novel | NO  | YES | NO  | NO  |
| SPAC3A12.14   | SPBC1347.12   | 0.4287532 | Novel | NO  | NO  | NO  | NO  |
| SPAC1F3.02c   | SPBC16H5.07c  | 0.4286789 | Novel | YES | NO  | NO  | YES |
| SPAC821.12    | SPAC6G10.12c  | 0.4285733 | Novel | NO  | NO  | NO  | NO  |
| SPAC637.10c   | SPBC16C6.07c  | 0.4285501 | Novel | YES | NO  | YES | NO  |
| SPAC9G1.09    | SPAC1834.06c  | 0.4285398 | Novel | YES | YES | NO  | NO  |
| SPAC22H10.07  | SPAC1F5.09c   | 0.4284435 | Novel | NO  | YES | NO  | YES |
| SPBC18H10.15  | SPAC23C11.12  | 0.4283922 | Novel | NO  | NO  | NO  | NO  |
| SPBC146.03c   | SPBC18H10.15  | 0.4283727 | Novel | NO  | YES | NO  | NO  |
| SPAC637.12c   | SPAC1952.05   | 0.4282955 | Novel | YES | NO  | YES | NO  |
| SPAC821.12    | SPCC970.09    | 0.4281946 | Novel | YES | YES | NO  | NO  |
| SPAC821.12    | SPBC16A3.01   | 0.4281538 | Novel | NO  | YES | NO  | NO  |
| SPAC630.03    | SPACUNK4.06c  | 0.4281206 | Novel | NO  | YES | NO  | NO  |
| SPBC16H5.07c  | SPCC1739.11c  | 0.4280972 | Novel | YES | NO  | NO  | YES |
| SPBC1685.01   | SPAC823.15    | 0.4280921 | Novel | NO  | NO  | YES | NO  |
| SPCC24B10.13  | SPAC1F5.09c   | 0.4280412 | Novel | NO  | NO  | NO  | YES |
| SPBC428.16c   | SPBC19C2.09   | 0.4280315 | Novel | NO  | NO  | NO  | NO  |
| SPBC543.07    | SPBC409.07c   | 0.428025  | Novel | YES | YES | YES | YES |
| SPBC428.16c   | SPAC1565.04c  | 0.4279813 | Novel | NO  | YES | NO  | NO  |
| SPAC16.01     | SPBC16A3.15c  | 0.4279614 | Novel | NO  | YES | NO  | NO  |
| SPBC428.16c   | SPBC646.12c   | 0.4279528 | Novel | NO  | NO  | NO  | NO  |
| SPBC1711.17   | SPAC8E11.02c  | 0.4279209 | Novel | NO  | NO  | NO  | NO  |
| SPAC23C11.16  | SPAC23H4.17c  | 0.427833  | Novel | NO  | YES | YES | NO  |
| SPBC428.16c   | SPBC21.05c    | 0.4277516 | Novel | NO  | NO  | NO  | NO  |
| SPACUNK12.02c | SPCC18B5.11c  | 0.4277319 | Novel | NO  | YES | YES | NO  |
| SPAC6G9.08    | SPBC16C6.07c  | 0.4276445 | Novel | NO  | NO  | YES | NO  |
| SPBC19C7.03   | SPBC19F8.07   | 0.427603  | Novel | NO  | YES | NO  | NO  |
| SPBC428.16c   | SPAC17C9.10   | 0.4275913 | Novel | NO  | NO  | YES | NO  |
| SPCC757.09c   | SPAC823.15    | 0.4275862 | Novel | NO  | NO  | NO  | NO  |
| SPBC16C6.07c  | SPBC409.06    | 0.4275644 | Novel | NO  | NO  | YES | NO  |
| SPBC16C6.07c  | SPBC646.09c   | 0.4275245 | Novel | NO  | NO  | NO  | NO  |
| SPBC119.08    | SPCC320.13c   | 0.4275228 | Novel | NO  | YES | YES | NO  |

|               |               |           |       |     |     |     |     |
|---------------|---------------|-----------|-------|-----|-----|-----|-----|
| SPAC24B11.06c | SPACUNK12.02c | 0.4275221 | Novel | NO  | YES | YES | NO  |
| SPAC821.12    | SPAC23C11.16  | 0.4274197 | Novel | NO  | YES | YES | NO  |
| SPBC18H10.15  | SPBC16H5.11c  | 0.4273858 | Novel | NO  | NO  | NO  | NO  |
| SPAC823.15    | SPAC20G4.07c  | 0.4273479 | Novel | NO  | NO  | NO  | NO  |
| SPAC821.12    | SPBC24C6.07   | 0.4273303 | Novel | NO  | YES | NO  | NO  |
| SPCC24B10.07  | SPBC1778.10c  | 0.4272933 | Novel | NO  | YES | YES | NO  |
| SPBC16C6.07c  | SPBP19A11.03c | 0.4272788 | Novel | YES | YES | YES | NO  |
| SPAPB8E5.02c  | SPBC16C6.07c  | 0.4271682 | Novel | NO  | NO  | YES | NO  |
| SPAC1420.03   | SPBC16C6.07c  | 0.4271682 | Novel | NO  | NO  | YES | NO  |
| SPBC582.03    | SPBC1711.17   | 0.4271143 | Novel | NO  | NO  | NO  | NO  |
| SPAC13D6.02c  | SPBC428.16c   | 0.4271084 | Novel | NO  | NO  | NO  | NO  |
| SPBC18H10.06c | SPAC12G12.14c | 0.4270861 | Novel | NO  | NO  | NO  | NO  |
| SPBC428.13c   | SPAC823.15    | 0.4270446 | Novel | NO  | NO  | NO  | YES |
| SPAC821.12    | SPAC9G1.11c   | 0.4269006 | Novel | NO  | YES | NO  | NO  |
| SPAC31G5.09c  | SPAC11E3.09   | 0.4268344 | Novel | NO  | NO  | NO  | NO  |
| SPAC110.03    | SPAC821.12    | 0.4265511 | Novel | NO  | YES | YES | YES |
| SPAC16.01     | SPCC320.13c   | 0.4265161 | Novel | NO  | YES | NO  | NO  |
| SPAC3A12.14   | SPAC1F5.04c   | 0.4263539 | Novel | NO  | YES | NO  | NO  |
| SPBC18H10.15  | SPCC16A11.05c | 0.4263252 | Novel | NO  | NO  | NO  | NO  |
| SPCC31H12.05c | SPBC18H10.15  | 0.4263173 | Novel | NO  | NO  | NO  | NO  |
| SPAC24B11.06c | SPBC106.10    | 0.4261663 | Novel | YES | YES | YES | YES |
| SPBC11B10.09  | SPCC24B10.07  | 0.4261151 | Novel | NO  | YES | YES | NO  |
| SPAC31G5.09c  | SPAC644.06c   | 0.4260988 | Novel | NO  | YES | YES | NO  |
| SPAC30D11.10  | SPAC11E3.04c  | 0.4259776 | Novel | NO  | YES | NO  | NO  |
| SPCC320.13c   | SPCC1739.11c  | 0.425923  | Novel | NO  | YES | YES | YES |
| SPAC6F6.08c   | SPAC23H4.17c  | 0.4259116 | Novel | NO  | NO  | NO  | NO  |
| SPAC18G6.03   | SPCC31H12.05c | 0.425878  | Novel | NO  | NO  | NO  | NO  |
| SPAC31G5.09c  | SPBC4C3.12    | 0.4258441 | Novel | NO  | NO  | NO  | NO  |
| SPBC16H5.07c  | SPAC1565.06c  | 0.4255951 | Novel | NO  | NO  | NO  | YES |
| SPBC16A3.15c  | SPAC20H4.11c  | 0.4255791 | Novel | NO  | YES | NO  | NO  |
| SPBC543.07    | SPAC821.12    | 0.4255556 | Novel | NO  | YES | YES | NO  |
| SPCC4B3.15    | SPAC2C4.14c   | 0.425534  | Novel | NO  | NO  | NO  | NO  |
| SPAC57A10.03  | SPAC23H3.04   | 0.4255048 | Novel | NO  | NO  | NO  | NO  |
| SPAPB1A10.10c | SPCC895.07    | 0.4254638 | Novel | NO  | NO  | NO  | NO  |
| SPBC11B10.09  | SPBC32C12.03c | 0.4254131 | Novel | NO  | YES | YES | NO  |
| SPAC9G1.09    | SPCC24B10.07  | 0.4253057 | Novel | NO  | YES | YES | NO  |
| SPBC11B10.09  | SPBC8D2.01    | 0.4251361 | Novel | NO  | YES | YES | NO  |
| SPAC23H3.04   | SPBC18H10.15  | 0.425125  | Novel | NO  | NO  | NO  | NO  |
| SPAC20H4.11c  | SPCC320.13c   | 0.4247073 | Novel | NO  | NO  | NO  | NO  |
| SPCC18B5.11c  | SPAC644.06c   | 0.4246012 | Novel | YES | YES | YES | YES |
| SPAC630.03    | SPAC1F5.04c   | 0.4244205 | Novel | YES | YES | YES | NO  |
| SPAC23H3.04   | SPAPB1A10.10c | 0.4242912 | Novel | NO  | NO  | NO  | NO  |
| SPAC18B11.07c | SPAC23C4.08   | 0.4242832 | Novel | NO  | NO  | NO  | NO  |
| SPBC582.03    | SPAC23H4.17c  | 0.4242407 | Novel | NO  | NO  | NO  | NO  |
| SPAC23H3.04   | SPBC1709.04c  | 0.4241907 | Novel | NO  | NO  | NO  | NO  |
| SPAC23C4.19   | SPBC19F8.07   | 0.4240963 | Novel | NO  | NO  | NO  | NO  |
| SPAC4A8.05c   | SPCC31H12.05c | 0.4240805 | Novel | NO  | NO  | NO  | NO  |



|               |               |           |       |     |     |     |     |
|---------------|---------------|-----------|-------|-----|-----|-----|-----|
| SPAC23H3.04   | SPAC1250.03   | 0.4240342 | Novel | NO  | NO  | NO  | NO  |
| SPBC19C7.03   | SPAC821.12    | 0.4239304 | Novel | NO  | YES | NO  | NO  |
| SPAC23C11.16  | SPBC106.10    | 0.4237946 | Novel | YES | YES | YES | YES |
| SPBC26H8.05c  | SPCC1739.11c  | 0.4237426 | Novel | NO  | NO  | NO  | NO  |
| SPAC22E12.14c | SPAC17G8.14c  | 0.4236565 | Novel | NO  | YES | YES | NO  |
| SPCC18B5.11c  | SPBC211.04c   | 0.4236467 | Novel | NO  | YES | NO  | YES |
| SPAC17H9.09c  | SPAC22H10.12c | 0.4235036 | Novel | NO  | NO  | YES | NO  |
| SPAC17A2.13c  | SPAC10F6.02c  | 0.423403  | Novel | NO  | NO  | NO  | NO  |
| SPAC24H6.09   | SPAC2C4.14c   | 0.4233849 | Novel | YES | NO  | NO  | NO  |
| SPBC16A3.07c  | SPBC725.16    | 0.4232168 | Novel | YES | NO  | NO  | YES |
| SPBC30D10.06  | SPAC644.12    | 0.4232159 | Novel | YES | NO  | YES | NO  |
| SPAC24B11.11c | SPCC24B10.07  | 0.4231416 | Novel | NO  | YES | YES | NO  |
| SPAC16.01     | SPBC800.05c   | 0.4231145 | Novel | NO  | YES | YES | NO  |
| SPAC27F1.02c  | SPAC2C4.14c   | 0.4229919 | Novel | NO  | NO  | NO  | NO  |
| SPBC1604.14c  | SPAC23H4.17c  | 0.4229535 | Novel | NO  | YES | YES | NO  |
| SPAC821.12    | SPCC18B5.11c  | 0.4229378 | Novel | NO  | YES | YES | NO  |
| SPBC1685.15c  | SPBC26H8.07c  | 0.4227555 | Novel | NO  | NO  | YES | NO  |
| SPBC800.05c   | SPAC1250.03   | 0.4226915 | Novel | NO  | NO  | NO  | NO  |
| SPBP16F5.04   | SPAC22H12.02  | 0.4225348 | Novel | NO  | NO  | NO  | NO  |
| SPBC543.07    | SPAC9G1.09    | 0.4224828 | Novel | NO  | YES | YES | NO  |
| SPCC297.03    | SPAC630.03    | 0.4224282 | Novel | YES | YES | YES | NO  |
| SPAC821.06    | SPAC24C9.15c  | 0.4223783 | Novel | YES | YES | NO  | NO  |
| SPAC31G5.09c  | SPBC24C6.07   | 0.4223399 | Novel | NO  | NO  | NO  | NO  |
| SPBC6B1.07    | SPBC30D10.06  | 0.4223092 | Novel | YES | NO  | YES | NO  |
| SPAC6F6.15    | SPBC1703.10   | 0.4220448 | Novel | NO  | YES | YES | NO  |
| SPCC16C4.11   | SPBC776.12c   | 0.4219636 | Novel | NO  | YES | YES | NO  |
| SPCC31H12.05c | SPAC1565.06c  | 0.4217969 | Novel | NO  | NO  | NO  | NO  |
| SPCC576.17c   | SPAC23H3.04   | 0.4217332 | Novel | YES | NO  | NO  | NO  |
| SPAC630.03    | SPAC27E2.05   | 0.4214192 | Novel | NO  | YES | NO  | NO  |
| SPCC31H12.05c | SPCC830.06    | 0.4213137 | Novel | NO  | NO  | NO  | NO  |
| SPBC543.07    | SPBC106.10    | 0.4213053 | Novel | YES | YES | YES | NO  |
| SPAC4D7.03    | SPBC11B10.09  | 0.4212367 | Novel | NO  | YES | NO  | YES |
| SPBC24C6.07   | SPBC16H5.07c  | 0.4212028 | Novel | NO  | NO  | NO  | YES |
| SPBC21.06c    | SPCC1739.12   | 0.4211896 | Novel | NO  | YES | NO  | YES |
| SPBP4H10.04   | SPBC19F8.07   | 0.4211142 | Novel | NO  | NO  | NO  | NO  |
| SPAC1805.12c  | SPAC11G7.04   | 0.4209242 | Novel | YES | YES | YES | YES |
| SPAC17C9.13c  | SPAC821.12    | 0.4208779 | Novel | NO  | NO  | NO  | NO  |
| SPAC16A10.04  | SPAC2C4.14c   | 0.4206485 | Novel | NO  | NO  | NO  | NO  |
| SPAC31G5.09c  | SPCC24B10.07  | 0.4204996 | Novel | NO  | YES | YES | NO  |
| SPBP4H10.04   | SPAC31A2.09c  | 0.4202946 | Novel | YES | NO  | NO  | NO  |
| SPBC2F12.13   | SPBC26H8.07c  | 0.42029   | Novel | NO  | NO  | YES | NO  |
| SPCC24B10.13  | SPAC2C4.14c   | 0.4202183 | Novel | NO  | NO  | NO  | NO  |
| SPBC21.06c    | SPCC24B10.07  | 0.4201778 | Novel | NO  | YES | YES | NO  |
| SPBC800.05c   | SPAC20H4.11c  | 0.420018  | Novel | NO  | YES | NO  | NO  |
| SPAC24B11.06c | SPAC821.12    | 0.4198721 | Novel | NO  | YES | YES | NO  |
| SPBC12D12.01  | SPAC31A2.09c  | 0.4197194 | Novel | NO  | NO  | NO  | NO  |
| SPBC12D12.08c | SPBC29B5.01   | 0.4196387 | Novel | NO  | YES | NO  | NO  |

|               |               |           |       |     |     |     |     |
|---------------|---------------|-----------|-------|-----|-----|-----|-----|
| SPAC3A11.13   | SPAC23H3.04   | 0.4195444 | Novel | NO  | NO  | NO  | NO  |
| SPAC31G5.09c  | SPBC26H8.05c  | 0.419539  | Novel | NO  | NO  | NO  | NO  |
| SPAC24H6.05   | SPAC1687.15   | 0.4195379 | Novel | NO  | NO  | NO  | NO  |
| SPBC24C6.07   | SPCC31H12.05c | 0.4195302 | Novel | NO  | NO  | NO  | NO  |
| SPBC2F12.13   | SPAC2C4.14c   | 0.4194674 | Novel | NO  | YES | NO  | NO  |
| SPCC794.03    | SPAC23H3.04   | 0.4194448 | Novel | YES | NO  | NO  | NO  |
| SPAC23A1.06c  | SPAC23H4.17c  | 0.4193864 | Novel | NO  | YES | YES | NO  |
| SPAC19G12.14  | SPCC31H12.05c | 0.4193017 | Novel | NO  | NO  | NO  | NO  |
| SPAC24B11.06c | SPBC649.05    | 0.4192874 | Novel | NO  | YES | NO  | YES |
| SPAC24B11.06c | SPBC29A10.15  | 0.4191993 | Novel | NO  | YES | NO  | YES |
| SPCC16C4.11   | SPAC23H4.17c  | 0.4191031 | Novel | NO  | YES | YES | NO  |
| SPAC31G5.21   | SPAC23H3.04   | 0.4190261 | Novel | NO  | NO  | YES | NO  |
| SPAC19G12.14  | SPBC16H5.07c  | 0.4189182 | Novel | NO  | NO  | YES | YES |
| SPBC18H10.15  | SPCC1322.08   | 0.418829  | Novel | NO  | YES | YES | NO  |
| SPCC24B10.07  | SPAC23C4.08   | 0.4187977 | Novel | NO  | YES | NO  | NO  |
| SPBC365.15    | SPBC26H8.07c  | 0.4186176 | Novel | NO  | NO  | YES | NO  |
| SPAC23H3.04   | SPAC2C4.14c   | 0.4185727 | Novel | NO  | NO  | NO  | NO  |
| SPAC31G5.09c  | SPBP16F5.02   | 0.4184127 | Novel | NO  | NO  | NO  | NO  |
| SPBC16C6.07c  | SPCC5E4.04    | 0.4183313 | Novel | NO  | NO  | NO  | NO  |
| SPAC607.09c   | SPAC4C5.02c   | 0.4182966 | Novel | NO  | NO  | NO  | NO  |
| SPAC6B12.15   | SPBC409.07c   | 0.4181697 | Novel | YES | YES | NO  | YES |
| SPBC32C12.02  | SPBC19F8.07   | 0.4179893 | Novel | NO  | NO  | NO  | NO  |
| SPAC22E12.16c | SPAC3A12.14   | 0.4179206 | Novel | NO  | YES | NO  | NO  |
| SPAC1D4.13    | SPAC9E9.07c   | 0.4179102 | Novel | NO  | NO  | NO  | NO  |
| SPCC4G3.08    | SPBC30D10.10c | 0.4178647 | Novel | NO  | YES | NO  | NO  |
| SPAC23G3.01   | SPAC22A12.05  | 0.4178561 | Novel | NO  | YES | NO  | NO  |
| SPAC23C11.16  | SPCC320.13c   | 0.4176169 | Novel | NO  | YES | NO  | YES |
| SPAC630.03    | SPAC2F7.03c   | 0.4175709 | Novel | NO  | YES | NO  | NO  |
| SPBC11B10.09  | SPAC3C7.06c   | 0.4175569 | Novel | NO  | YES | YES | NO  |
| SPAC22E12.14c | SPBC12D12.04c | 0.4175189 | Novel | NO  | YES | YES | NO  |
| SPBP16F5.07   | SPCC31H12.05c | 0.4174228 | Novel | NO  | NO  | NO  | NO  |
| SPBC32F12.04  | SPAC1786.03   | 0.41722   | Novel | YES | NO  | NO  | YES |
| SPCC297.03    | SPBC19F8.07   | 0.4171316 | Novel | YES | YES | YES | NO  |
| SPAC24H6.05   | SPAC2F3.15    | 0.4171311 | Novel | NO  | NO  | NO  | YES |
| SPBC1685.01   | SPCC31H12.05c | 0.4170649 | Novel | NO  | NO  | NO  | NO  |
| SPAC9G1.09    | SPCC18B5.11c  | 0.417063  | Novel | NO  | YES | YES | YES |
| SPAC630.03    | SPBC336.12c   | 0.4169255 | Novel | YES | YES | NO  | NO  |
| SPBC32H8.10   | SPAC2F3.15    | 0.4168484 | Novel | YES | YES | YES | NO  |
| SPAC30D11.13  | SPBC15D4.14   | 0.4168121 | Novel | NO  | NO  | NO  | YES |
| SPAC29A4.16   | SPBC19F8.07   | 0.4168086 | Novel | NO  | YES | YES | NO  |
| SPBC19C2.05   | SPAC9E9.07c   | 0.4165942 | Novel | NO  | NO  | NO  | NO  |
| SPBC16A3.15c  | SPAC1250.03   | 0.4165374 | Novel | NO  | NO  | NO  | NO  |
| SPAC664.01c   | SPAC11E3.04c  | 0.4164973 | Novel | NO  | YES | NO  | NO  |
| SPAC3A12.14   | SPAC20G4.06c  | 0.4164834 | Novel | NO  | NO  | NO  | NO  |
| SPAC57A7.08   | SPAC1639.02c  | 0.4164231 | Novel | NO  | NO  | YES | NO  |
| SPAC110.03    | SPCC320.13c   | 0.4163742 | Novel | NO  | YES | NO  | NO  |
| SPAC1B9.02c   | SPAC17G8.14c  | 0.4162661 | Novel | NO  | YES | YES | NO  |

|               |               |           |       |     |     |     |     |
|---------------|---------------|-----------|-------|-----|-----|-----|-----|
| SPCC757.09c   | SPCC31H12.05c | 0.4161638 | Novel | NO  | NO  | NO  | NO  |
| SPCC330.10    | SPBC19F8.07   | 0.4161221 | Novel | NO  | NO  | NO  | NO  |
| SPAC1687.03c  | SPAC14C4.13   | 0.4161054 | Novel | YES | YES | NO  | NO  |
| SPAC16A10.04  | SPAC11E3.04c  | 0.4159926 | Novel | NO  | NO  | NO  | NO  |
| SPAC110.03    | SPBC1D7.05    | 0.4158598 | Novel | NO  | YES | NO  | YES |
| SPBC16C6.07c  | SPAC20H4.11c  | 0.4157623 | Novel | NO  | NO  | NO  | NO  |
| SPAC22E12.14c | SPCC320.13c   | 0.4157268 | Novel | NO  | YES | NO  | NO  |
| SPAC16.01     | SPBC16C6.07c  | 0.4156964 | Novel | NO  | NO  | NO  | NO  |
| SPAC23H3.04   | SPBPJ4664.02  | 0.4156905 | Novel | NO  | NO  | NO  | NO  |
| SPBC428.13c   | SPCC31H12.05c | 0.4156861 | Novel | NO  | NO  | NO  | NO  |
| SPCC31H12.05c | SPAC20G4.07c  | 0.4156515 | Novel | NO  | NO  | NO  | NO  |
| SPAC1D4.13    | SPAC23C4.08   | 0.4155026 | Novel | NO  | YES | NO  | NO  |
| SPAC24B11.06c | SPAC1687.15   | 0.4154315 | Novel | NO  | YES | YES | NO  |
| SPAPB2B4.03   | SPAC23H4.17c  | 0.4152418 | Novel | NO  | NO  | NO  | NO  |
| SPBC543.07    | SPBC19C2.05   | 0.4152336 | Novel | YES | YES | YES | NO  |
| SPAC31G5.09c  | SPCC18B5.11c  | 0.4151844 | Novel | NO  | YES | YES | NO  |
| SPCC18B5.11c  | SPAC2C4.14c   | 0.4150589 | Novel | YES | YES | YES | NO  |
| SPAC31G5.09c  | SPAC19E9.02   | 0.4150081 | Novel | NO  | YES | YES | NO  |
| SPAC17G8.14c  | SPBC19F8.07   | 0.4148444 | Novel | NO  | YES | YES | NO  |
| SPBC12D12.08c | SPAC637.10c   | 0.4147246 | Novel | NO  | NO  | NO  | NO  |
| SPBC16A3.15c  | SPAC1F7.04    | 0.414699  | Novel | NO  | YES | NO  | NO  |
| SPAC19E9.03   | SPAC22F3.09c  | 0.4146808 | Novel | NO  | YES | YES | YES |
| SPAC22H10.07  | SPAC2C4.14c   | 0.4146263 | Novel | YES | NO  | NO  | NO  |
| SPAC23H3.04   | SPBP19A11.02c | 0.4146202 | Novel | YES | NO  | YES | NO  |
| SPAC630.03    | SPAC27F1.02c  | 0.4145436 | Novel | YES | YES | YES | NO  |
| SPAPB1A10.09  | SPAC3A12.14   | 0.4145296 | Novel | YES | NO  | NO  | NO  |
| SPAC630.03    | SPBC582.03    | 0.414528  | Novel | NO  | YES | NO  | NO  |
| SPBC2F12.13   | SPBC1604.20c  | 0.4144488 | Novel | YES | YES | YES | NO  |
| SPBC12D12.04c | SPAC2C4.14c   | 0.4144447 | Novel | YES | YES | YES | NO  |
| SPCC16C4.11   | SPAC3C7.06c   | 0.4144363 | Novel | NO  | YES | YES | NO  |
| SPBC428.12c   | SPBC16A3.05c  | 0.4143525 | Novel | NO  | NO  | NO  | NO  |
| SPAC3G9.07c   | SPAC23H3.04   | 0.414314  | Novel | NO  | NO  | NO  | NO  |
| SPAC630.03    | SPAC15A10.08  | 0.414289  | Novel | NO  | YES | YES | NO  |
| SPCC16C4.11   | SPCC24B10.07  | 0.4142751 | Novel | NO  | YES | YES | NO  |
| SPAC22E12.14c | SPBC30D10.10c | 0.4142041 | Novel | NO  | YES | YES | NO  |
| SPCC830.06    | SPBC16H5.07c  | 0.4142021 | Novel | YES | NO  | YES | YES |
| SPAC630.03    | SPBC16A3.15c  | 0.4141426 | Novel | NO  | NO  | NO  | NO  |
| SPBC1D7.05    | SPAC9E9.07c   | 0.4141143 | Novel | NO  | NO  | NO  | NO  |
| SPBC215.13    | SPAC23H3.04   | 0.4141081 | Novel | NO  | NO  | YES | NO  |
| SPAC630.03    | SPBC1778.06c  | 0.4140921 | Novel | YES | YES | YES | NO  |
| SPCC1259.13   | SPCC320.13c   | 0.4140461 | Novel | NO  | YES | NO  | NO  |
| SPAC630.03    | SPBC776.18c   | 0.4140026 | Novel | NO  | YES | NO  | NO  |
| SPBC12D12.04c | SPBC19F8.07   | 0.4139571 | Novel | NO  | YES | YES | NO  |
| SPBC106.10    | SPCC320.13c   | 0.4138474 | Novel | NO  | YES | NO  | NO  |
| SPAC11H11.06  | SPCC645.05c   | 0.4138066 | Novel | NO  | YES | NO  | NO  |
| SPBC26H8.05c  | SPAC1565.06c  | 0.4137814 | Novel | NO  | NO  | NO  | NO  |
| SPAC630.03    | SPAC4F8.10c   | 0.4137729 | Novel | YES | NO  | NO  | NO  |

|               |               |           |       |     |     |     |     |
|---------------|---------------|-----------|-------|-----|-----|-----|-----|
| SPAC977.10    | SPAC1639.02c  | 0.4137185 | Novel | YES | NO  | NO  | NO  |
| SPAC644.04    | SPBC19F8.07   | 0.4136321 | Novel | NO  | NO  | NO  | NO  |
| SPAPB18E9.04c | SPAC23C4.08   | 0.4135035 | Novel | NO  | NO  | NO  | NO  |
| SPAC630.03    | SPAP8A3.08    | 0.4134121 | Novel | NO  | YES | YES | NO  |
| SPAC30D11.13  | SPAC6F12.15c  | 0.4134102 | Novel | NO  | YES | NO  | NO  |
| SPCC16C4.11   | SPAC110.03    | 0.41337   | Novel | NO  | YES | NO  | NO  |
| SPCC18B5.11c  | SPBC19F8.07   | 0.4133084 | Novel | NO  | YES | YES | YES |
| SPCC1739.12   | SPAC1F3.02c   | 0.4132281 | Novel | NO  | YES | NO  | YES |
| SPBC244.01c   | SPCC320.13c   | 0.4131844 | Novel | NO  | YES | YES | YES |
| SPBC11B10.09  | SPBC1D7.05    | 0.4130845 | Novel | NO  | YES | YES | YES |
| SPBC26H8.07c  | SPBC428.20c   | 0.41307   | Novel | NO  | NO  | YES | NO  |
| SPBC646.09c   | SPAC9E9.07c   | 0.4130579 | Novel | NO  | NO  | NO  | NO  |
| SPBC428.12c   | SPAP27G11.10c | 0.4128449 | Novel | NO  | NO  | NO  | NO  |
| SPAC3A11.14c  | SPBC26H8.07c  | 0.4128283 | Novel | NO  | NO  | YES | YES |
| SPBC428.08c   | SPAC11E3.04c  | 0.4128277 | Novel | NO  | YES | NO  | NO  |
| SPBC428.12c   | SPAC821.04c   | 0.4127769 | Novel | NO  | YES | NO  | NO  |
| SPAC24B11.06c | SPBC14C8.07c  | 0.4125448 | Novel | NO  | YES | NO  | YES |
| SPCC16C4.11   | SPAC1687.15   | 0.4125384 | Novel | NO  | YES | YES | NO  |
| SPCC1259.13   | SPCC1682.02c  | 0.412464  | Novel | NO  | YES | NO  | YES |
| SPAC24B11.11c | SPBC543.07    | 0.41197   | Novel | NO  | YES | YES | YES |
| SPAC6F6.15    | SPAC607.09c   | 0.4119557 | Novel | NO  | NO  | YES | NO  |
| SPAC23H3.04   | SPCC1840.02c  | 0.4119187 | Novel | NO  | NO  | NO  | NO  |
| SPAC4A8.05c   | SPBC16H5.07c  | 0.4118163 | Novel | NO  | NO  | NO  | YES |
| SPAC16A10.04  | SPAC1D4.13    | 0.4118075 | Novel | NO  | NO  | NO  | NO  |
| SPBC26H8.07c  | SPBC20F10.06  | 0.411802  | Novel | NO  | NO  | NO  | YES |
| SPAC24B11.11c | SPAC4F10.11   | 0.4116402 | Novel | NO  | YES | NO  | YES |
| SPAC3A11.09   | SPAC11G7.02   | 0.411575  | Novel | NO  | NO  | NO  | NO  |
| SPAC22H10.04  | SPBC21.06c    | 0.41144   | Novel | NO  | NO  | NO  | NO  |
| SPAC664.01c   | SPBC119.02    | 0.4114331 | Novel | NO  | NO  | NO  | YES |
| SPCC16C4.08c  | SPAC2C4.14c   | 0.4114218 | Novel | NO  | NO  | NO  | NO  |
| SPCC5E4.03c   | SPAC1250.03   | 0.4113789 | Novel | NO  | NO  | NO  | NO  |
| SPBC12D12.08c | SPBP19A11.03c | 0.4113085 | Novel | NO  | YES | NO  | NO  |
| SPCC16C4.11   | SPAC17A2.13c  | 0.4112472 | Novel | NO  | YES | NO  | NO  |
| SPAC22H12.02  | SPAC11E3.04c  | 0.4112019 | Novel | NO  | YES | NO  | NO  |
| SPBC11B10.09  | SPAC23H4.02   | 0.4111939 | Novel | NO  | YES | YES | NO  |
| SPCC16C4.09   | SPAC2C4.14c   | 0.4111471 | Novel | YES | NO  | NO  | NO  |
| SPAC3A11.09   | SPAC3F10.02c  | 0.4110821 | Novel | YES | YES | YES | NO  |
| SPAC24B11.06c | SPCC1322.12c  | 0.4108973 | Novel | NO  | YES | YES | YES |
| SPBC32F12.04  | SPBC428.08c   | 0.4108952 | Novel | YES | NO  | NO  | NO  |
| SPBC32F12.04  | SPBC336.12c   | 0.4108849 | Novel | NO  | NO  | NO  | NO  |
| SPAC3A11.12c  | SPAC1F7.04    | 0.4108012 | Novel | NO  | NO  | NO  | NO  |
| SPBC405.04c   | SPBC13G1.11   | 0.4107164 | Novel | NO  | NO  | YES | NO  |
| SPBC24C6.07   | SPBC26H8.05c  | 0.4105682 | Novel | NO  | NO  | NO  | NO  |
| SPAP8A3.04c   | SPAC3A12.14   | 0.4103443 | Novel | NO  | NO  | NO  | NO  |
| SPCC1259.13   | SPACUNK12.02c | 0.4103309 | Novel | NO  | YES | YES | NO  |
| SPCC16C4.09   | SPBC543.07    | 0.4102752 | Novel | YES | NO  | NO  | YES |
| SPBC6B1.07    | SPBC20F10.09  | 0.4101687 | Novel | YES | NO  | YES | NO  |

|               |               |           |       |     |     |     |     |
|---------------|---------------|-----------|-------|-----|-----|-----|-----|
| SPCC1259.13   | SPBC211.04c   | 0.4101378 | Novel | NO  | YES | NO  | YES |
| SPBC20F10.09  | SPAC644.12    | 0.4099249 | Novel | YES | NO  | YES | NO  |
| SPCC18B5.03   | SPBC8D2.01    | 0.4098797 | Novel | NO  | YES | NO  | NO  |
| SPBC32F12.04  | SPBC4.05      | 0.4098361 | Novel | NO  | NO  | NO  | NO  |
| SPAC31G5.09c  | SPBC18H10.15  | 0.4095615 | Novel | NO  | YES | YES | NO  |
| SPAC11H11.06  | SPAC3A12.14   | 0.4095595 | Novel | NO  | NO  | NO  | YES |
| SPBC1198.12   | SPBC19F8.07   | 0.4095346 | Novel | NO  | NO  | NO  | NO  |
| SPBC32F12.04  | SPBC11C11.04c | 0.4093754 | Novel | NO  | NO  | NO  | YES |
| SPBC11B10.09  | SPBC776.12c   | 0.4093569 | Novel | NO  | YES | YES | YES |
| SPCC5E4.04    | SPCC320.13c   | 0.4092649 | Novel | NO  | YES | YES | NO  |
| SPAC23H3.04   | SPBC1709.18   | 0.409194  | Novel | NO  | NO  | NO  | NO  |
| SPCC16C4.09   | SPCC320.13c   | 0.4089405 | Novel | NO  | NO  | NO  | NO  |
| SPBC11B10.09  | SPBC17F3.02   | 0.4089184 | Novel | NO  | YES | YES | YES |
| SPBC1718.07c  | SPAC23H3.13c  | 0.4088025 | Novel | NO  | YES | NO  | YES |
| SPAC1F7.04    | SPBC800.05c   | 0.4086923 | Novel | NO  | YES | NO  | NO  |
| SPBC543.07    | SPCC320.13c   | 0.408586  | Novel | NO  | YES | YES | NO  |
| SPBC32F12.04  | SPAC664.01c   | 0.4084718 | Novel | NO  | NO  | NO  | NO  |
| SPCC16C4.11   | SPBC1685.06   | 0.4084684 | Novel | NO  | YES | NO  | NO  |
| SPAC23H3.04   | SPBC16H5.10c  | 0.4081214 | Novel | NO  | NO  | NO  | NO  |
| SPAC6B12.15   | SPBC409.05    | 0.4080449 | Novel | NO  | YES | NO  | NO  |
| SPBC32F12.04  | SPBC119.02    | 0.4079699 | Novel | NO  | NO  | NO  | NO  |
| SPBC32F12.04  | SPAC8E11.07c  | 0.407541  | Novel | NO  | NO  | NO  | NO  |
| SPAC18G6.03   | SPBC16H5.07c  | 0.4073961 | Novel | YES | NO  | NO  | YES |
| SPAC22H10.04  | SPAC1F3.02c   | 0.4072597 | Novel | YES | NO  | NO  | NO  |
| SPCC1259.13   | SPAC23H4.17c  | 0.4071745 | Novel | NO  | YES | YES | NO  |
| SPAC1F3.02c   | SPBC106.10    | 0.4070534 | Novel | YES | YES | YES | NO  |
| SPAC2F3.15    | SPAC644.06c   | 0.406934  | Novel | NO  | YES | NO  | NO  |
| SPBC26H8.07c  | SPBC211.06    | 0.40681   | Novel | NO  | NO  | YES | NO  |
| SPBC1D7.05    | SPBC119.08    | 0.4067773 | Novel | YES | YES | YES | YES |
| SPBC1D7.05    | SPAC23H3.13c  | 0.4066884 | Novel | NO  | YES | NO  | NO  |
| SPBC16A3.15c  | SPAC23C4.08   | 0.4066662 | Novel | NO  | YES | YES | NO  |
| SPCC18B5.11c  | SPBC119.08    | 0.4065709 | Novel | YES | YES | YES | NO  |
| SPAC24H6.05   | SPBC32C12.03c | 0.4063353 | Novel | NO  | NO  | NO  | NO  |
| SPAC630.03    | SPBC800.05c   | 0.4062985 | Novel | NO  | NO  | YES | NO  |
| SPBC12D12.07c | SPAC23H3.04   | 0.4062628 | Novel | NO  | NO  | NO  | NO  |
| SPCC1739.12   | SPCC24B10.07  | 0.4061411 | Novel | NO  | YES | NO  | NO  |
| SPBC32F12.04  | SPCC11E10.08  | 0.4060743 | Novel | YES | NO  | NO  | NO  |
| SPBC32F12.06  | SPAC23H4.17c  | 0.4058145 | Novel | NO  | NO  | NO  | NO  |
| SPAC24H6.05   | SPAC23H4.02   | 0.4057858 | Novel | YES | NO  | NO  | NO  |
| SPAC24B11.11c | SPCC18B5.11c  | 0.4057337 | Novel | NO  | YES | YES | YES |
| SPAC1B9.02c   | SPBC12D12.04c | 0.4057164 | Novel | NO  | YES | YES | NO  |
| SPBC543.07    | SPAC1006.09   | 0.4056905 | Novel | NO  | YES | YES | NO  |
| SPBC13E7.09   | SPBC17F3.02   | 0.4053113 | Novel | YES | YES | NO  | YES |
| SPBC32F12.04  | SPBC1D7.04    | 0.4052043 | Novel | NO  | NO  | NO  | NO  |
| SPCC1259.13   | SPBC119.08    | 0.4051532 | Novel | YES | YES | YES | NO  |
| SPBP16F5.07   | SPBC16H5.07c  | 0.4049189 | Novel | NO  | NO  | NO  | YES |
| SPAC24B11.06c | SPAC144.13c   | 0.4049151 | Novel | NO  | NO  | NO  | YES |

|               |               |           |       |     |     |     |     |
|---------------|---------------|-----------|-------|-----|-----|-----|-----|
| SPBC2F12.09c  | SPAC22F3.02   | 0.4048872 | Novel | NO  | YES | YES | YES |
| SPAC23C11.16  | SPCC4G3.08    | 0.4048821 | Novel | NO  | YES | YES | NO  |
| SPCC320.13c   | SPBC19F8.07   | 0.4046583 | Novel | NO  | YES | NO  | NO  |
| SPBC26H8.07c  | SPCC4G3.19    | 0.4044163 | Novel | NO  | NO  | YES | NO  |
| SPCC1739.12   | SPCC1739.11c  | 0.4043199 | Novel | NO  | YES | NO  | NO  |
| SPAC16A10.04  | SPAC18B11.07c | 0.4041502 | Novel | NO  | NO  | NO  | NO  |
| SPAC23H3.04   | SPAC23A1.09   | 0.4039801 | Novel | NO  | NO  | NO  | NO  |
| SPBC337.08c   | SPAC26A3.16   | 0.4038321 | Novel | NO  | NO  | NO  | YES |
| SPAC24C9.07c  | SPCC417.06c   | 0.4038092 | Novel | YES | NO  | NO  | NO  |
| SPAC23H3.04   | SPAC6F6.15    | 0.4034981 | Novel | NO  | NO  | NO  | NO  |
| SPBC409.07c   | SPAC1687.15   | 0.4034074 | Novel | NO  | YES | YES | NO  |
| SPAC24B11.11c | SPAC27E2.11c  | 0.4032258 | Novel | NO  | NO  | NO  | NO  |
| SPAC24B11.06c | SPAC821.08c   | 0.4031014 | Novel | NO  | YES | YES | YES |
| SPBC428.08c   | SPBC119.02    | 0.4030985 | Novel | NO  | NO  | NO  | YES |
| SPBC1685.01   | SPBC16H5.07c  | 0.4030735 | Novel | YES | NO  | YES | YES |
| SPCC757.09c   | SPBC16H5.07c  | 0.4029363 | Novel | NO  | NO  | NO  | YES |
| SPBC16C6.07c  | SPBC887.04c   | 0.4027876 | Novel | NO  | NO  | NO  | NO  |
| SPBC409.07c   | SPACUNK12.02c | 0.4026332 | Novel | NO  | YES | YES | NO  |
| SPAC23H3.04   | SPAC4G9.06c   | 0.4025087 | Novel | NO  | NO  | NO  | NO  |
| SPAC20G4.07c  | SPBC16H5.07c  | 0.4024578 | Novel | NO  | NO  | NO  | YES |
| SPBC428.13c   | SPBC16H5.07c  | 0.4023465 | Novel | NO  | NO  | NO  | YES |
| SPBP4H10.04   | SPAC2C4.14c   | 0.4023266 | Novel | YES | NO  | NO  | NO  |
| SPAC22H10.04  | SPBC19F8.07   | 0.4021405 | Novel | YES | NO  | NO  | NO  |
| SPCC576.10c   | SPAC1F7.04    | 0.402112  | Novel | NO  | NO  | NO  | NO  |
| SPBC543.07    | SPCC1322.08   | 0.4018209 | Novel | YES | YES | YES | NO  |
| SPBC660.14    | SPCC18B5.11c  | 0.4016753 | Novel | NO  | YES | YES | YES |
| SPAC31G5.09c  | SPAC57A10.02  | 0.4016143 | Novel | NO  | YES | YES | NO  |
| SPBC21.06c    | SPBC11B10.09  | 0.4016016 | Novel | NO  | YES | YES | YES |
| SPAC24B11.06c | SPAC22F3.09c  | 0.4015769 | Novel | YES | YES | NO  | YES |
| SPBC800.05c   | SPAC23C4.08   | 0.4015754 | Novel | NO  | YES | YES | NO  |
| SPAC24B11.06c | SPBC685.09    | 0.4015445 | Novel | NO  | NO  | NO  | YES |
| SPBC543.07    | SPAC23A1.06c  | 0.4015104 | Novel | YES | YES | YES | NO  |
| SPBC16C6.07c  | SPAC2C4.15c   | 0.4012471 | Novel | NO  | NO  | YES | NO  |
| SPAC821.12    | SPBC119.08    | 0.40118   | Novel | NO  | YES | YES | NO  |
| SPBC4.07c     | SPAC9E9.07c   | 0.4011771 | Novel | NO  | NO  | NO  | NO  |
| SPAC343.09    | SPBC16C6.07c  | 0.4011195 | Novel | NO  | NO  | NO  | NO  |
| SPAC19G12.14  | SPBC26H8.05c  | 0.4010855 | Novel | NO  | NO  | YES | NO  |
| SPBC16C6.07c  | SPBC14C8.01c  | 0.400887  | Novel | NO  | NO  | NO  | NO  |
| SPAC23H3.04   | SPBP16F5.04   | 0.4007514 | Novel | NO  | NO  | NO  | NO  |
| SPAC19D5.01   | SPAC23H4.17c  | 0.4006926 | Novel | NO  | NO  | NO  | NO  |
| SPAC22H12.02  | SPBC119.02    | 0.4004786 | Novel | NO  | NO  | NO  | NO  |
| SPAC24B11.06c | SPBC336.12c   | 0.4004213 | Novel | YES | YES | NO  | YES |
| SPBC3F6.01c   | SPCC1739.12   | 0.4003959 | Novel | NO  | YES | YES | NO  |
| SPBC1685.15c  | SPBC1604.20c  | 0.400176  | Novel | YES | YES | YES | NO  |
| SPAC27E2.10c  | SPBC1734.02c  | 0.3998895 | Novel | NO  | NO  | NO  | NO  |
| SPAC2F3.15    | SPAC1F5.09c   | 0.3997738 | Novel | NO  | YES | NO  | NO  |
| SPAC222.15    | SPACUNK12.02c | 0.3997462 | Novel | NO  | NO  | NO  | NO  |

|               |               |           |       |     |     |     |     |
|---------------|---------------|-----------|-------|-----|-----|-----|-----|
| SPAC31G5.09c  | SPBC32H8.10   | 0.3997256 | Novel | NO  | YES | YES | NO  |
| SPCC24B10.07  | SPAC1782.09c  | 0.3997192 | Novel | NO  | YES | NO  | NO  |
| SPAC31G5.09c  | SPBC119.08    | 0.3996303 | Novel | NO  | YES | YES | NO  |
| SPAC24B11.06c | SPAC821.04c   | 0.3995501 | Novel | YES | YES | NO  | YES |
| SPBC16E9.11c  | SPBC119.08    | 0.3994584 | Novel | NO  | NO  | NO  | NO  |
| SPAPB2B4.03   | SPAC11E3.04c  | 0.3992248 | Novel | NO  | YES | NO  | NO  |
| SPAC1D4.13    | SPAC23H4.17c  | 0.3990439 | Novel | NO  | YES | YES | NO  |
| SPAC607.09c   | SPAC9E9.07c   | 0.3990064 | Novel | NO  | NO  | NO  | NO  |
| SPBC543.07    | SPBC1718.07c  | 0.3989777 | Novel | NO  | NO  | NO  | NO  |
| SPBC15D4.14   | SPAC1250.03   | 0.3989118 | Novel | NO  | NO  | NO  | NO  |
| SPBC18H10.15  | SPAC1F5.09c   | 0.3988844 | Novel | NO  | YES | YES | NO  |
| SPBC18H10.15  | SPAC2C4.14c   | 0.3988221 | Novel | NO  | YES | YES | NO  |
| SPBC1718.07c  | SPAC9E9.07c   | 0.3987792 | Novel | NO  | NO  | NO  | NO  |
| SPBC4C3.12    | SPAC23H4.17c  | 0.3985274 | Novel | NO  | NO  | YES | NO  |
| SPAC30D11.10  | SPBC119.02    | 0.3985243 | Novel | NO  | NO  | NO  | NO  |
| SPBC649.05    | SPCC320.13c   | 0.3984607 | Novel | NO  | YES | YES | NO  |
| SPAC6F12.15c  | SPAC1250.03   | 0.3982768 | Novel | NO  | NO  | YES | NO  |
| SPBC8D2.19    | SPBC19F8.07   | 0.3982419 | Novel | NO  | YES | YES | NO  |
| SPBC336.04    | SPAC24B11.06c | 0.3975661 | Novel | NO  | YES | NO  | YES |
| SPAC22E12.14c | SPBC119.08    | 0.3973706 | Novel | NO  | YES | YES | NO  |
| SPBC1685.01   | SPBC11B10.09  | 0.397239  | Novel | NO  | YES | NO  | NO  |
| SPAC222.10c   | SPAC9E9.07c   | 0.3972256 | Novel | NO  | NO  | NO  | NO  |
| SPAC24B11.11c | SPAC57A7.08   | 0.3971363 | Novel | NO  | NO  | NO  | NO  |
| SPBP16F5.04   | SPAC664.01c   | 0.3970235 | Novel | NO  | NO  | YES | NO  |
| SPAC26F1.10c  | SPAC23H4.17c  | 0.3968488 | Novel | NO  | NO  | NO  | NO  |
| SPCC24B10.07  | SPBC1604.14c  | 0.3967904 | Novel | NO  | YES | YES | NO  |
| SPBC354.03    | SPAC6B12.15   | 0.3967886 | Novel | NO  | NO  | NO  | NO  |
| SPAC22H10.04  | SPCC1739.11c  | 0.3965948 | Novel | YES | NO  | NO  | NO  |
| SPCC16C4.11   | SPBC8D2.01    | 0.3964756 | Novel | NO  | YES | YES | NO  |
| SPCC1739.12   | SPBC24C6.07   | 0.3963864 | Novel | NO  | YES | NO  | YES |
| SPAC17G8.14c  | SPAC2C4.14c   | 0.3962848 | Novel | YES | YES | YES | NO  |
| SPCC18B5.03   | SPAC23H4.02   | 0.396175  | Novel | NO  | YES | NO  | NO  |
| SPAC22E12.14c | SPCC4G3.08    | 0.3960736 | Novel | NO  | YES | YES | NO  |
| SPBC3F6.01c   | SPAC823.15    | 0.3960656 | Novel | NO  | YES | YES | NO  |
| SPAC17G8.14c  | SPCC320.13c   | 0.3958456 | Novel | NO  | YES | NO  | NO  |
| SPAC1D4.13    | SPBC12D12.04c | 0.3957949 | Novel | NO  | YES | YES | NO  |
| SPBC405.04c   | SPCC895.07    | 0.3957057 | Novel | NO  | NO  | NO  | NO  |
| SPBC1711.17   | SPAC17A2.13c  | 0.3955789 | Novel | NO  | NO  | NO  | NO  |
| SPAC57A7.08   | SPBC26H8.05c  | 0.395578  | Novel | NO  | YES | YES | NO  |
| SPBC2D10.14c  | SPAC3A12.14   | 0.3955481 | Novel | NO  | NO  | NO  | NO  |
| SPAC31G5.09c  | SPAPB2B4.03   | 0.3955093 | Novel | NO  | NO  | NO  | NO  |
| SPBC23E6.01c  | SPAC23H3.04   | 0.3954961 | Novel | NO  | NO  | YES | NO  |
| SPAC23H3.04   | SPBC577.05c   | 0.3954056 | Novel | NO  | NO  | NO  | NO  |
| SPCC24B10.07  | SPCC1739.11c  | 0.3953447 | Novel | NO  | YES | NO  | NO  |
| SPAC16A10.04  | SPCC24B10.07  | 0.3951878 | Novel | NO  | NO  | NO  | NO  |
| SPCC188.09c   | SPBC18E5.03c  | 0.3951518 | Novel | NO  | NO  | NO  | NO  |
| SPBC428.08c   | SPBP16F5.04   | 0.3951356 | Novel | NO  | NO  | YES | NO  |

|               |               |           |       |     |     |     |     |
|---------------|---------------|-----------|-------|-----|-----|-----|-----|
| SPAC3F10.02c  | SPBC26H8.05c  | 0.3950924 | Novel | NO  | NO  | NO  | NO  |
| SPBC2D10.14c  | SPBC1709.01   | 0.3950412 | Novel | NO  | NO  | YES | NO  |
| SPAC9G1.09    | SPBC32H8.10   | 0.3949966 | Novel | NO  | YES | YES | NO  |
| SPAC23H3.04   | SPBC1105.09   | 0.3949778 | Novel | NO  | NO  | NO  | NO  |
| SPAC24B11.11c | SPCC576.15c   | 0.3948457 | Novel | NO  | YES | YES | NO  |
| SPCC188.09c   | SPAC25B8.14   | 0.3947183 | Novel | NO  | NO  | NO  | NO  |
| SPAC31G5.09c  | SPCC1739.11c  | 0.3946954 | Novel | NO  | NO  | NO  | NO  |
| SPCC188.09c   | SPAC16A10.05c | 0.3946585 | Novel | NO  | NO  | NO  | NO  |
| SPAC110.03    | SPAC4F10.15c  | 0.3946258 | Novel | NO  | YES | NO  | NO  |
| SPCC18B5.11c  | SPBC18H10.15  | 0.39451   | Novel | NO  | YES | YES | NO  |
| SPBP16F5.04   | SPAC30D11.10  | 0.3944369 | Novel | NO  | NO  | NO  | NO  |
| SPCC576.15c   | SPCC320.13c   | 0.3944309 | Novel | NO  | YES | NO  | NO  |
| SPAC1F3.02c   | SPBC19F8.07   | 0.3943984 | Novel | YES | YES | YES | NO  |
| SPCC18B5.11c  | SPCC1682.02c  | 0.3939092 | Novel | NO  | YES | NO  | YES |
| SPAC1B9.02c   | SPBC119.08    | 0.3937749 | Novel | NO  | YES | YES | NO  |
| SPBC11B10.09  | SPAC7D4.15c   | 0.3937465 | Novel | NO  | NO  | NO  | NO  |
| SPBC9B6.10    | SPAC23H4.17c  | 0.3937293 | Novel | NO  | NO  | NO  | NO  |
| SPCC1739.12   | SPCC830.06    | 0.3937289 | Novel | NO  | NO  | NO  | NO  |
| SPAC23H3.04   | SPAC1250.01   | 0.3935998 | Novel | NO  | NO  | NO  | NO  |
| SPAC22H10.04  | SPCC830.06    | 0.3935932 | Novel | YES | NO  | YES | NO  |
| SPCC18B5.03   | SPAC2F3.15    | 0.3935861 | Novel | NO  | YES | NO  | NO  |
| SPAC23A1.06c  | SPAC1687.15   | 0.3933774 | Novel | NO  | YES | YES | NO  |
| SPAC13D6.02c  | SPBC146.07    | 0.3933735 | Novel | NO  | NO  | NO  | NO  |
| SPAC31G5.09c  | SPCC320.13c   | 0.3931607 | Novel | NO  | YES | NO  | NO  |
| SPCC16C4.11   | SPAC23C4.08   | 0.3931327 | Novel | NO  | YES | NO  | NO  |
| SPAC16.01     | SPBC11B10.09  | 0.3931198 | Novel | NO  | YES | NO  | YES |
| SPCC1739.12   | SPAC1565.06c  | 0.3930929 | Novel | NO  | YES | NO  | NO  |
| SPBP8B7.25    | SPAC23H3.04   | 0.3930622 | Novel | YES | NO  | NO  | NO  |
| SPCC16C4.11   | SPBC32C12.03c | 0.3930491 | Novel | NO  | YES | YES | NO  |
| SPBC26H8.05c  | SPAC1F3.02c   | 0.3929396 | Novel | NO  | NO  | NO  | NO  |
| SPBC19F8.01c  | SPAC821.06    | 0.3929064 | Novel | YES | YES | NO  | NO  |
| SPAC4A8.05c   | SPCC1739.12   | 0.3928544 | Novel | NO  | YES | NO  | NO  |
| SPCC5E4.03c   | SPBP16F5.04   | 0.3928257 | Novel | NO  | NO  | NO  | NO  |
| SPBC26H8.07c  | SPAC30D11.13  | 0.3928246 | Novel | NO  | NO  | NO  | YES |
| SPAC31G5.09c  | SPBC106.10    | 0.39263   | Novel | NO  | YES | YES | NO  |
| SPAC24B11.06c | SPBC146.03c   | 0.3924301 | Novel | YES | YES | YES | YES |
| SPAC4A8.05c   | SPAC22H10.04  | 0.3924161 | Novel | NO  | NO  | NO  | NO  |
| SPBC32H8.10   | SPAC23C11.16  | 0.3922561 | Novel | NO  | YES | YES | NO  |
| SPBC409.07c   | SPBC8D2.01    | 0.3922558 | Novel | YES | YES | YES | NO  |
| SPAC222.10c   | SPAC2C4.14c   | 0.3922484 | Novel | NO  | NO  | NO  | NO  |
| SPAC23H3.04   | SPBC2D10.20   | 0.3921906 | Novel | NO  | NO  | NO  | NO  |
| SPBP16F5.02   | SPAC23H4.17c  | 0.3920852 | Novel | NO  | NO  | NO  | NO  |
| SPAC821.12    | SPCC417.06c   | 0.3920257 | Novel | NO  | YES | YES | NO  |
| SPAC1B9.02c   | SPCC4G3.08    | 0.3919181 | Novel | NO  | YES | YES | NO  |
| SPAC19B12.03  | SPCC417.06c   | 0.39187   | Novel | NO  | NO  | NO  | NO  |
| SPAC22F3.09c  | SPAC23H4.17c  | 0.3918025 | Novel | NO  | NO  | YES | NO  |
| SPBC3F6.01c   | SPBC16H5.07c  | 0.3917216 | Novel | YES | YES | YES | NO  |



|               |               |           |       |     |     |     |     |
|---------------|---------------|-----------|-------|-----|-----|-----|-----|
| SPCC16C4.11   | SPAC27F1.02c  | 0.3916435 | Novel | NO  | NO  | NO  | NO  |
| SPAC24B11.11c | SPCC320.13c   | 0.3914197 | Novel | NO  | YES | NO  | YES |
| SPBC1D7.04    | SPAC30D11.13  | 0.3913446 | Novel | NO  | YES | NO  | NO  |
| SPAC1565.08   | SPAC3G6.02    | 0.3913317 | Novel | YES | YES | NO  | NO  |
| SPCC16C4.11   | SPBC1718.07c  | 0.3911617 | Novel | NO  | YES | NO  | NO  |
| SPCC1259.13   | SPAC2F3.15    | 0.3910511 | Novel | NO  | YES | NO  | NO  |
| SPAC22H10.04  | SPAC1565.06c  | 0.3910421 | Novel | NO  | NO  | NO  | NO  |
| SPCC1682.16   | SPCC5E4.04    | 0.3910394 | Novel | NO  | NO  | NO  | NO  |
| SPBC336.12c   | SPAC23H4.17c  | 0.3910247 | Novel | NO  | NO  | YES | NO  |
| SPAC23A1.06c  | SPAC2F3.15    | 0.3909947 | Novel | NO  | YES | NO  | NO  |
| SPAC644.06c   | SPAC23H4.17c  | 0.3909083 | Novel | NO  | YES | YES | NO  |
| SPCC16C4.11   | SPBC660.14    | 0.3908307 | Novel | NO  | YES | YES | NO  |
| SPAC2F3.15    | SPBC17F3.02   | 0.390698  | Novel | NO  | YES | NO  | NO  |
| SPAC24B11.06c | SPBC16H5.11c  | 0.3906429 | Novel | NO  | YES | YES | YES |
| SPAC24B11.11c | SPAC24B11.06c | 0.3903422 | Novel | NO  | YES | YES | NO  |
| SPAC589.10c   | SPAC11G7.04   | 0.3902934 | Novel | NO  | YES | YES | NO  |
| SPAC1805.12c  | SPAC6G10.11c  | 0.3902934 | Novel | NO  | YES | YES | YES |
| SPAC6G10.11c  | SPAC11G7.04   | 0.3902934 | Novel | NO  | YES | YES | YES |
| SPAC1805.12c  | SPAC589.10c   | 0.3902934 | Novel | YES | YES | YES | NO  |
| SPBC32F12.09  | SPAC23H4.17c  | 0.3900631 | Novel | NO  | NO  | NO  | NO  |
| SPAC31G5.09c  | SPAC19E9.03   | 0.3898581 | Novel | NO  | NO  | NO  | NO  |
| SPCC645.05c   | SPCC1682.04   | 0.3897734 | Novel | NO  | NO  | NO  | NO  |
| SPCC16C4.09   | SPBC32C12.03c | 0.3897463 | Novel | NO  | NO  | NO  | NO  |
| SPAC19G12.14  | SPCC1739.12   | 0.3896159 | Novel | NO  | NO  | NO  | NO  |
| SPAC22H10.04  | SPBC24C6.07   | 0.3895488 | Novel | NO  | NO  | NO  | NO  |
| SPCC16C4.11   | SPBC106.10    | 0.389475  | Novel | NO  | YES | YES | NO  |
| SPAC19G12.14  | SPAC22H10.04  | 0.3894412 | Novel | NO  | NO  | YES | NO  |
| SPAC24B11.06c | SPAC6B12.11   | 0.3891462 | Novel | NO  | YES | NO  | YES |
| SPAC18G6.03   | SPCC1739.12   | 0.3889726 | Novel | NO  | NO  | NO  | NO  |
| SPACUNK12.02c | SPBC19C2.05   | 0.3889107 | Novel | NO  | YES | YES | NO  |
| SPAC1D4.13    | SPBP4H10.04   | 0.3889071 | Novel | NO  | NO  | NO  | NO  |
| SPAC18G6.03   | SPAC22H10.04  | 0.3888177 | Novel | YES | NO  | NO  | NO  |
| SPBC649.05    | SPAC23H4.17c  | 0.3886192 | Novel | NO  | NO  | NO  | NO  |
| SPBC32F12.15  | SPAC23H3.04   | 0.388608  | Novel | NO  | NO  | NO  | NO  |
| SPAC343.04c   | SPAC23H3.13c  | 0.3885858 | Novel | NO  | NO  | NO  | NO  |
| SPCC1739.12   | SPBP16F5.07   | 0.3881463 | Novel | NO  | NO  | NO  | NO  |
| SPBC26H8.05c  | SPBC19F8.07   | 0.3881344 | Novel | NO  | NO  | NO  | NO  |
| SPBC409.07c   | SPAC23H4.17c  | 0.3880075 | Novel | NO  | YES | YES | NO  |
| SPBC32F12.04  | SPAC664.10    | 0.3878402 | Novel | NO  | NO  | YES | NO  |
| SPAC22H10.04  | SPBP16F5.07   | 0.387831  | Novel | NO  | NO  | NO  | NO  |
| SPAC23H3.04   | SPCC1682.16   | 0.3878089 | Novel | NO  | NO  | NO  | NO  |
| SPAC4D7.03    | SPAC6B12.15   | 0.3874021 | Novel | NO  | YES | NO  | NO  |
| SPAC821.12    | SPAC17G8.14c  | 0.3869969 | Novel | NO  | YES | YES | NO  |
| SPAC24B11.11c | SPAC7D4.15c   | 0.3869702 | Novel | NO  | NO  | NO  | NO  |
| SPCC16C4.11   | SPCC16C4.09   | 0.386926  | Novel | NO  | NO  | NO  | NO  |
| SPCC4F11.02   | SPBC19F8.07   | 0.386896  | Novel | NO  | NO  | NO  | NO  |
| SPAC23H3.04   | SPCC4G3.08    | 0.3868499 | Novel | NO  | NO  | NO  | NO  |

|               |               |           |       |     |     |     |     |
|---------------|---------------|-----------|-------|-----|-----|-----|-----|
| SPBC1685.01   | SPAC22H10.04  | 0.3867841 | Novel | YES | NO  | YES | NO  |
| SPBC18H10.15  | SPBC776.18c   | 0.3867244 | Novel | NO  | NO  | NO  | NO  |
| SPAC821.12    | SPCC4G3.08    | 0.3866454 | Novel | NO  | YES | YES | NO  |
| SPBC543.07    | SPAC2F3.15    | 0.3865165 | Novel | NO  | YES | NO  | NO  |
| SPAC24B11.11c | SPBP19A11.02c | 0.3865079 | Novel | NO  | NO  | NO  | NO  |
| SPAPB2B4.03   | SPBC16H5.10c  | 0.386444  | Novel | NO  | NO  | NO  | NO  |
| SPAC22H10.04  | SPCC757.09c   | 0.3863695 | Novel | NO  | NO  | NO  | NO  |
| SPBC21.06c    | SPAC7D4.15c   | 0.3862379 | Novel | NO  | NO  | NO  | NO  |
| SPAC24B11.06c | SPBC1D7.05    | 0.3862358 | Novel | YES | YES | YES | NO  |
| SPCC24B10.07  | SPBC17F3.02   | 0.3861956 | Novel | NO  | YES | YES | NO  |
| SPAC1782.09c  | SPAC2C4.14c   | 0.3859818 | Novel | NO  | NO  | NO  | NO  |
| SPBC25D12.03c | SPBC1347.10   | 0.3859532 | Novel | NO  | NO  | YES | YES |
| SPBC543.07    | SPBC18H10.15  | 0.3857152 | Novel | NO  | YES | YES | NO  |
| SPAC22H10.04  | SPAC20G4.07c  | 0.3856967 | Novel | NO  | NO  | NO  | NO  |
| SPCC16C4.11   | SPBC17F3.02   | 0.385654  | Novel | NO  | YES | YES | NO  |
| SPAC110.03    | SPBC16A3.15c  | 0.3855863 | Novel | NO  | YES | NO  | YES |
| SPBC1685.01   | SPCC1739.12   | 0.3853984 | Novel | NO  | YES | YES | NO  |
| SPAC24B11.06c | SPAC3C7.06c   | 0.3852855 | Novel | NO  | YES | YES | NO  |
| SPBC543.07    | SPAC9G1.02    | 0.3852333 | Novel | YES | YES | YES | NO  |
| SPAC23C4.08   | SPAC1250.03   | 0.3851597 | Novel | NO  | NO  | NO  | NO  |
| SPAC22H10.04  | SPBC428.13c   | 0.385144  | Novel | NO  | NO  | NO  | NO  |
| SPAC31G5.09c  | SPAC6F6.08c   | 0.3851072 | Novel | NO  | NO  | NO  | NO  |
| SPAC644.12    | SPCC18.05c    | 0.3850904 | Novel | NO  | NO  | NO  | NO  |
| SPCC757.09c   | SPCC1739.12   | 0.3850582 | Novel | NO  | YES | NO  | NO  |
| SPCC18B5.03   | SPAC7D4.15c   | 0.384974  | Novel | NO  | NO  | NO  | NO  |
| SPAC19G12.14  | SPAC7D4.15c   | 0.3849346 | Novel | NO  | NO  | NO  | NO  |
| SPBC32C12.02  | SPBC18H10.15  | 0.3848952 | Novel | NO  | NO  | NO  | NO  |
| SPAC23H3.04   | SPBC1711.15c  | 0.384845  | Novel | NO  | NO  | YES | NO  |
| SPAC1D4.13    | SPBC1604.14c  | 0.3847474 | Novel | NO  | YES | YES | YES |
| SPAPB1A10.09  | SPAC7D4.15c   | 0.3847234 | Novel | NO  | NO  | NO  | NO  |
| SPAC1565.06c  | SPAC2C4.14c   | 0.3846741 | Novel | NO  | NO  | NO  | NO  |
| SPAC7D4.15c   | SPCC1322.12c  | 0.3846154 | Novel | NO  | NO  | NO  | NO  |
| SPAC7D4.15c   | SPCC5E4.04    | 0.3846154 | Novel | NO  | NO  | NO  | NO  |
| SPBC19G7.05c  | SPAC2C4.14c   | 0.3846137 | Novel | YES | NO  | NO  | NO  |
| SPBC428.13c   | SPCC1739.12   | 0.3845605 | Novel | NO  | YES | NO  | NO  |
| SPAC823.03    | SPBC24C6.07   | 0.3845363 | Novel | YES | NO  | NO  | NO  |
| SPAC1D4.13    | SPAC821.12    | 0.3845068 | Novel | NO  | YES | YES | NO  |
| SPCC1739.12   | SPAC20G4.07c  | 0.3845026 | Novel | NO  | NO  | NO  | NO  |
| SPAC23H3.04   | SPAC1A6.03c   | 0.3843982 | Novel | NO  | NO  | NO  | NO  |
| SPAC7D4.15c   | SPAC23C4.18c  | 0.3843708 | Novel | NO  | NO  | NO  | NO  |
| SPBC18H10.15  | SPBC119.08    | 0.38436   | Novel | NO  | YES | YES | NO  |
| SPCC16C4.07   | SPAC7D4.15c   | 0.3843315 | Novel | NO  | NO  | NO  | NO  |
| SPAC7D4.15c   | SPCC1739.11c  | 0.3843155 | Novel | NO  | NO  | NO  | NO  |
| SPAC7D4.15c   | SPAC20G8.05c  | 0.3842765 | Novel | NO  | NO  | NO  | NO  |
| SPBC582.03    | SPAC7D4.15c   | 0.3839508 | Novel | NO  | NO  | NO  | NO  |
| SPAC821.12    | SPBC30D10.10c | 0.3839234 | Novel | NO  | YES | YES | NO  |
| SPBC4F6.12    | SPAC7D4.15c   | 0.383881  | Novel | NO  | NO  | NO  | NO  |

|               |               |           |       |     |     |     |     |
|---------------|---------------|-----------|-------|-----|-----|-----|-----|
| SPAPB2B4.03   | SPAC7D4.15c   | 0.3838305 | Novel | NO  | NO  | NO  | NO  |
| SPAC6B12.15   | SPBC23E6.09   | 0.3838271 | Novel | NO  | NO  | NO  | NO  |
| SPBC119.08    | SPAC23C11.16  | 0.3837447 | Novel | YES | YES | YES | NO  |
| SPAC821.12    | SPBC12D12.04c | 0.3836599 | Novel | NO  | YES | YES | NO  |
| SPCC285.12    | SPAC644.12    | 0.3835842 | Novel | YES | NO  | YES | NO  |
| SPAC24B11.06c | SPBC19G7.05c  | 0.3835513 | Novel | NO  | NO  | NO  | YES |
| SPAC6F6.08c   | SPAC7D4.15c   | 0.3835165 | Novel | NO  | NO  | NO  | NO  |
| SPBC3F6.01c   | SPBC776.02c   | 0.3833529 | Novel | YES | YES | YES | NO  |
| SPBC24C6.07   | SPAC7D4.15c   | 0.3832231 | Novel | NO  | NO  | NO  | NO  |
| SPAC30D11.13  | SPCC338.05c   | 0.3832126 | Novel | NO  | YES | NO  | NO  |
| SPAC824.04    | SPAC23H3.05c  | 0.3831348 | Novel | NO  | NO  | NO  | NO  |
| SPAC1F5.10    | SPAC3G6.02    | 0.3830769 | Novel | NO  | NO  | NO  | NO  |
| SPBC21.06c    | SPBC17F3.02   | 0.3829956 | Novel | YES | YES | YES | NO  |
| SPBC17F3.02   | SPCC1739.11c  | 0.3828977 | Novel | YES | YES | YES | NO  |
| SPAC7D4.15c   | SPAC1565.06c  | 0.3828964 | Novel | NO  | NO  | NO  | NO  |
| SPCC16C4.09   | SPCC24B10.07  | 0.3826639 | Novel | NO  | NO  | NO  | NO  |
| SPAC19E9.02   | SPAC23H4.17c  | 0.3825988 | Novel | NO  | YES | YES | NO  |
| SPAC227.16c   | SPAC7D4.15c   | 0.3825222 | Novel | NO  | NO  | NO  | NO  |
| SPAC1F7.04    | SPBC1D7.05    | 0.3825137 | Novel | NO  | YES | NO  | YES |
| SPBC23G7.15c  | SPAC23H3.04   | 0.3824176 | Novel | NO  | NO  | NO  | NO  |
| SPAC9G1.09    | SPAC1F3.02c   | 0.3823118 | Novel | NO  | YES | YES | NO  |
| SPBC12D12.04c | SPCC320.13c   | 0.3822838 | Novel | NO  | YES | NO  | NO  |
| SPAC24B11.06c | SPBC887.10    | 0.3822158 | Novel | YES | YES | YES | YES |
| SPAC57A10.02  | SPAC23H4.17c  | 0.3821162 | Novel | NO  | YES | YES | NO  |
| SPBC56F2.07c  | SPAC3G6.02    | 0.3821081 | Novel | NO  | NO  | NO  | NO  |
| SPCC24B10.07  | SPCC18B5.11c  | 0.3820573 | Novel | NO  | YES | YES | NO  |
| SPBC32H8.07   | SPAC9E9.07c   | 0.3820075 | Novel | NO  | NO  | NO  | NO  |
| SPCC16C4.11   | SPBC1685.01   | 0.3819523 | Novel | NO  | YES | NO  | NO  |
| SPAC7D4.15c   | SPAC4A8.15c   | 0.3817664 | Novel | NO  | NO  | NO  | NO  |
| SPAC1805.15c  | SPAC31G5.09c  | 0.381715  | Novel | NO  | NO  | NO  | NO  |
| SPAC4D7.05    | SPAC24B11.06c | 0.3816221 | Novel | NO  | YES | YES | YES |
| SPAC110.03    | SPBC800.05c   | 0.3814895 | Novel | NO  | YES | NO  | NO  |
| SPCC417.06c   | SPCC1840.02c  | 0.3813768 | Novel | NO  | NO  | NO  | NO  |
| SPCC576.10c   | SPAC16.01     | 0.3813648 | Novel | NO  | NO  | NO  | NO  |
| SPAC4F10.15c  | SPAC23C4.08   | 0.381362  | Novel | NO  | YES | YES | NO  |
| SPBC29A10.15  | SPAC23H4.17c  | 0.3813552 | Novel | NO  | YES | NO  | NO  |
| SPAC23H3.04   | SPBC16E9.10c  | 0.3813197 | Novel | NO  | NO  | NO  | NO  |
| SPBC776.02c   | SPAC23H4.17c  | 0.3812839 | Novel | NO  | NO  | NO  | NO  |
| SPBP16F5.04   | SPAC6F12.15c  | 0.381255  | Novel | NO  | NO  | YES | NO  |
| SPAC110.03    | SPAC30D11.13  | 0.3811259 | Novel | NO  | YES | NO  | NO  |
| SPAC23H3.04   | SPAC5H10.13c  | 0.3811128 | Novel | YES | NO  | NO  | NO  |
| SPAC4D7.03    | SPBC582.03    | 0.3811085 | Novel | NO  | YES | NO  | YES |
| SPAC926.04c   | SPAC24B11.06c | 0.3810617 | Novel | YES | YES | NO  | YES |
| SPBC26H8.05c  | SPCC830.06    | 0.3809197 | Novel | NO  | NO  | YES | NO  |
| SPBP16F5.04   | SPBC15D4.14   | 0.3808541 | Novel | NO  | NO  | NO  | NO  |
| SPCC18B5.03   | SPBC32C12.03c | 0.3806198 | Novel | NO  | YES | NO  | NO  |
| SPAC4D7.03    | SPAPB2B4.03   | 0.3805645 | Novel | NO  | YES | NO  | YES |

|               |               |           |       |     |     |     |     |
|---------------|---------------|-----------|-------|-----|-----|-----|-----|
| SPAC24B11.11c | SPAC1F5.09c   | 0.380475  | Novel | NO  | YES | YES | NO  |
| SPAC2G11.11c  | SPAC23H3.04   | 0.3803326 | Novel | NO  | NO  | NO  | NO  |
| SPAC6B12.15   | SPBC32F12.09  | 0.3802394 | Novel | NO  | NO  | NO  | NO  |
| SPAC24B11.06c | SPBC342.05    | 0.3802052 | Novel | NO  | YES | NO  | YES |
| SPAC24B11.06c | SPBC646.13    | 0.3800966 | Novel | NO  | YES | NO  | YES |
| SPBC146.03c   | SPAC23H4.17c  | 0.3800789 | Novel | NO  | YES | NO  | NO  |
| SPCC16C4.11   | SPAC1805.17   | 0.3797157 | Novel | NO  | NO  | NO  | NO  |
| SPAC24B11.11c | SPBC19F8.07   | 0.3797092 | Novel | NO  | YES | YES | YES |
| SPAC4D7.03    | SPBC354.03    | 0.3796958 | Novel | NO  | NO  | NO  | NO  |
| SPCC1682.02c  | SPBC776.12c   | 0.3793891 | Novel | NO  | YES | YES | YES |
| SPBC1718.01   | SPAC6B12.15   | 0.3791992 | Novel | NO  | YES | NO  | NO  |
| SPAC823.03    | SPCC1739.11c  | 0.3790817 | Novel | YES | NO  | NO  | NO  |
| SPAC3A11.12c  | SPAC16.01     | 0.3789475 | Novel | NO  | NO  | NO  | NO  |
| SPCC1672.10   | SPAC3G9.07c   | 0.3788937 | Novel | NO  | NO  | YES | NO  |
| SPBC3F6.01c   | SPCC31H12.05c | 0.3785784 | Novel | NO  | YES | NO  | NO  |
| SPAC23C11.12  | SPAC23H4.17c  | 0.3785753 | Novel | NO  | NO  | NO  | NO  |
| SPAC821.12    | SPBC19F8.07   | 0.3783544 | Novel | NO  | YES | YES | NO  |
| SPAC18G6.03   | SPBC26H8.05c  | 0.3782558 | Novel | NO  | NO  | NO  | NO  |
| SPAC8E11.02c  | SPAC14C4.03   | 0.3782055 | Novel | NO  | NO  | NO  | YES |
| SPBC12D12.07c | SPAC23C4.08   | 0.3778727 | Novel | NO  | NO  | NO  | NO  |
| SPAC4F10.15c  | SPCC1223.06   | 0.3778305 | Novel | YES | YES | YES | NO  |
| SPAC23C4.08   | SPBC19F8.07   | 0.3778243 | Novel | NO  | NO  | NO  | NO  |
| SPAC3G9.07c   | SPAC23D3.09   | 0.3777504 | Novel | NO  | NO  | YES | NO  |
| SPAC23H3.04   | SPBC16C6.07c  | 0.3776939 | Novel | NO  | NO  | NO  | NO  |
| SPBC1D7.05    | SPAC20H4.11c  | 0.3776329 | Novel | YES | NO  | NO  | NO  |
| SPAC23A1.06c  | SPAC2C4.14c   | 0.3776081 | Novel | NO  | YES | YES | NO  |
| SPAC1D4.13    | SPBC21.06c    | 0.3775026 | Novel | NO  | YES | YES | YES |
| SPAC821.12    | SPAPB18E9.04c | 0.3773339 | Novel | NO  | NO  | NO  | NO  |
| SPAC6B12.15   | SPAC17G6.12   | 0.3772591 | Novel | NO  | NO  | NO  | NO  |
| SPAC23H3.04   | SPBC26H8.06   | 0.3772338 | Novel | NO  | NO  | NO  | NO  |
| SPAC16A10.04  | SPBP19A11.02c | 0.3771981 | Novel | NO  | NO  | NO  | NO  |
| SPBC26H8.07c  | SPBC1105.09   | 0.3771499 | Novel | NO  | NO  | NO  | NO  |
| SPAC24H6.03   | SPBC32H8.02c  | 0.3770637 | Novel | NO  | NO  | NO  | NO  |
| SPAC1F3.02c   | SPCC320.13c   | 0.3770483 | Novel | NO  | YES | YES | NO  |
| SPAC6F6.15    | SPCC895.07    | 0.3769119 | Novel | NO  | NO  | NO  | NO  |
| SPCC1259.15c  | SPAC1F7.04    | 0.3768752 | Novel | NO  | NO  | NO  | NO  |
| SPAC24B11.06c | SPBC1718.01   | 0.3768118 | Novel | NO  | YES | YES | YES |
| SPAC8E11.02c  | SPBC32C12.03c | 0.3767899 | Novel | NO  | NO  | NO  | NO  |
| SPCC18B5.03   | SPAC1687.15   | 0.3767641 | Novel | NO  | YES | NO  | NO  |
| SPCC24B10.07  | SPBC244.01c   | 0.3767324 | Novel | NO  | YES | NO  | NO  |
| SPAC4A8.05c   | SPBC26H8.05c  | 0.3766883 | Novel | NO  | NO  | NO  | NO  |
| SPBC713.06    | SPCC18B5.11c  | 0.3766515 | Novel | NO  | YES | NO  | NO  |
| SPAC23H3.04   | SPAC4H3.14c   | 0.3765956 | Novel | NO  | NO  | YES | NO  |
| SPAC23C4.08   | SPCC320.13c   | 0.3765521 | Novel | NO  | YES | NO  | NO  |
| SPAC24H6.03   | SPBC2D10.20   | 0.3763088 | Novel | NO  | NO  | NO  | NO  |
| SPBC6B1.07    | SPCC1620.01c  | 0.3762866 | Novel | YES | NO  | YES | NO  |
| SPAC110.03    | SPBC106.10    | 0.3762267 | Novel | NO  | YES | NO  | NO  |

|               |               |           |       |     |     |     |     |
|---------------|---------------|-----------|-------|-----|-----|-----|-----|
| SPAC1687.15   | SPBC19F8.07   | 0.3760577 | Novel | NO  | YES | YES | NO  |
| SPCC16C4.09   | SPAC23H4.02   | 0.3760247 | Novel | YES | NO  | NO  | NO  |
| SPCC970.04c   | SPAC2C4.14c   | 0.3757755 | Novel | YES | NO  | YES | NO  |
| SPAC16A10.04  | SPBPJ4664.02  | 0.3756876 | Novel | NO  | NO  | NO  | NO  |
| SPBC582.03    | SPCC1682.02c  | 0.3756643 | Novel | NO  | NO  | NO  | YES |
| SPAC31G5.09c  | SPBC32F12.06  | 0.3756392 | Novel | NO  | NO  | NO  | NO  |
| SPAC24B11.06c | SPBC32F12.09  | 0.3755565 | Novel | NO  | NO  | NO  | YES |
| SPCC895.07    | SPBC1734.04   | 0.3755336 | Novel | NO  | NO  | NO  | NO  |
| SPBC887.10    | SPAC23H4.17c  | 0.3755306 | Novel | NO  | NO  | NO  | NO  |
| SPAC23H4.17c  | SPAC821.08c   | 0.3755226 | Novel | NO  | NO  | NO  | NO  |
| SPAC110.03    | SPAC9G1.09    | 0.375454  | Novel | NO  | YES | NO  | NO  |
| SPAC823.03    | SPAC23C11.16  | 0.3753889 | Novel | YES | YES | YES | NO  |
| SPAC1687.03c  | SPBC1734.02c  | 0.3753322 | Novel | NO  | NO  | NO  | NO  |
| SPCC18B5.11c  | SPBC106.10    | 0.375272  | Novel | NO  | YES | YES | NO  |
| SPCC320.13c   | SPBC14C8.01c  | 0.3751055 | Novel | NO  | NO  | YES | NO  |
| SPAC24B11.06c | SPCC1795.11   | 0.3750651 | Novel | YES | YES | YES | YES |
| SPAC24H6.03   | SPAC30D11.13  | 0.375052  | Novel | NO  | NO  | YES | NO  |
| SPAC1F7.04    | SPBC106.10    | 0.375043  | Novel | NO  | YES | NO  | NO  |
| SPCC1322.12c  | SPAC23H4.17c  | 0.3749828 | Novel | NO  | YES | YES | NO  |
| SPAC16A10.04  | SPBC215.13    | 0.3749367 | Novel | NO  | NO  | NO  | NO  |
| SPCC895.07    | SPAC1B3.11c   | 0.374872  | Novel | NO  | NO  | NO  | NO  |
| SPAC22E12.14c | SPAC1F7.04    | 0.3748704 | Novel | NO  | NO  | NO  | NO  |
| SPAC110.03    | SPBC2D10.20   | 0.3748467 | Novel | NO  | NO  | NO  | NO  |
| SPAC24B11.06c | SPBC8D2.01    | 0.3748368 | Novel | YES | YES | YES | NO  |
| SPCC1620.01c  | SPAC19A8.13   | 0.3747988 | Novel | NO  | NO  | YES | NO  |
| SPACUNK12.02c | SPBC29A10.15  | 0.37477   | Novel | NO  | YES | NO  | NO  |
| SPAC23H3.04   | SPAC977.07c   | 0.3747284 | Novel | NO  | NO  | NO  | NO  |
| SPAC23H3.04   | SPBC1348.08c  | 0.3747284 | Novel | NO  | NO  | NO  | NO  |
| SPBC1D7.04    | SPBC2D10.20   | 0.3747194 | Novel | NO  | NO  | NO  | NO  |
| SPAC6B12.15   | SPCC24B10.07  | 0.3745886 | Novel | NO  | YES | YES | NO  |
| SPAC110.03    | SPBC1105.09   | 0.3744337 | Novel | NO  | NO  | NO  | NO  |
| SPBC4.05      | SPBC2D10.20   | 0.3742424 | Novel | NO  | YES | NO  | NO  |
| SPAC4A8.05c   | SPCC1919.10c  | 0.3739639 | Novel | NO  | YES | YES | YES |
| SPBC2D10.14c  | SPCC1919.10c  | 0.3739628 | Novel | YES | YES | NO  | NO  |
| SPBC2D10.20   | SPBC26H8.07c  | 0.3739375 | Novel | NO  | NO  | NO  | NO  |
| SPCC16A11.17  | SPBC14C8.07c  | 0.3738809 | Novel | YES | YES | YES | YES |
| SPAC23H3.04   | SPACUNK12.02c | 0.3738712 | Novel | NO  | NO  | NO  | NO  |
| SPCC16C4.11   | SPAC17A2.09c  | 0.3738091 | Novel | NO  | NO  | NO  | NO  |
| SPAC24B11.06c | SPBC409.09c   | 0.3738025 | Novel | NO  | YES | NO  | NO  |
| SPBP4H10.04   | SPAC3A12.14   | 0.3737636 | Novel | NO  | NO  | YES | YES |
| SPAC1F7.04    | SPBC11B10.09  | 0.3736683 | Novel | NO  | YES | NO  | YES |
| SPAC1D4.13    | SPCC320.13c   | 0.3735907 | Novel | NO  | YES | NO  | NO  |
| SPAC23H3.04   | SPAC1B3.11c   | 0.3734814 | Novel | NO  | NO  | NO  | NO  |
| SPAC23H3.04   | SPCC417.06c   | 0.3734452 | Novel | NO  | NO  | NO  | NO  |
| SPBC1198.09   | SPAC1F7.04    | 0.3734445 | Novel | NO  | NO  | NO  | NO  |
| SPAC3F10.11c  | SPBC359.05    | 0.3733836 | Novel | YES | YES | NO  | NO  |
| SPCC18B5.11c  | SPAC23C11.16  | 0.3733745 | Novel | NO  | YES | YES | YES |

|               |               |           |       |     |     |     |     |
|---------------|---------------|-----------|-------|-----|-----|-----|-----|
| SPAC1687.15   | SPCC1322.08   | 0.3733289 | Novel | NO  | YES | YES | NO  |
| SPAC8E11.03c  | SPBC11B10.10c | 0.3733185 | Novel | NO  | YES | NO  | NO  |
| SPCC188.02    | SPAC2C4.14c   | 0.373304  | Novel | YES | NO  | NO  | NO  |
| SPCC1753.02c  | SPCC4G3.08    | 0.3732477 | Novel | NO  | NO  | NO  | NO  |
| SPAC16.01     | SPBC106.10    | 0.3732476 | Novel | NO  | YES | NO  | NO  |
| SPAC24B11.06c | SPAC23C11.12  | 0.3731744 | Novel | NO  | YES | NO  | YES |
| SPBC4.05      | SPBC1105.09   | 0.3731473 | Novel | NO  | YES | NO  | NO  |
| SPACUNK12.02c | SPBC776.12c   | 0.3731129 | Novel | NO  | YES | YES | NO  |
| SPBC26H8.05c  | SPBP16F5.07   | 0.3730686 | Novel | NO  | NO  | NO  | NO  |
| SPAPB2B4.03   | SPCC1682.02c  | 0.3729562 | Novel | NO  | NO  | NO  | YES |
| SPAC15A10.03c | SPAC24B11.06c | 0.372851  | Novel | NO  | YES | NO  | YES |
| SPAC144.13c   | SPAC23H4.17c  | 0.3728198 | Novel | NO  | NO  | NO  | NO  |
| SPBC1685.01   | SPAC3A12.14   | 0.3728079 | Novel | NO  | YES | NO  | NO  |
| SPBC2D10.14c  | SPAC29A4.05   | 0.3727617 | Novel | NO  | NO  | NO  | NO  |
| SPAC24H6.03   | SPBC1105.09   | 0.3727507 | Novel | NO  | NO  | NO  | NO  |
| SPAC24B11.11c | SPAC24C9.15c  | 0.3725713 | Novel | NO  | NO  | NO  | NO  |
| SPAC24B11.06c | SPAC29A4.02c  | 0.3724786 | Novel | NO  | NO  | NO  | YES |
| SPCC18B5.11c  | SPCC320.13c   | 0.3724287 | Novel | NO  | YES | NO  | NO  |
| SPAC3A11.12c  | SPAC20H4.11c  | 0.3723942 | Novel | NO  | NO  | NO  | NO  |
| SPBC1D7.04    | SPBC1105.09   | 0.3722598 | Novel | NO  | NO  | NO  | NO  |
| SPAC9G1.09    | SPAC23C11.16  | 0.3718913 | Novel | YES | YES | YES | YES |
| SPBC3F6.01c   | SPBP4H10.04   | 0.3718803 | Novel | NO  | YES | YES | NO  |
| SPCC645.05c   | SPBC1347.12   | 0.3718444 | Novel | NO  | NO  | NO  | NO  |
| SPCC5E4.04    | SPBC19F8.07   | 0.3717016 | Novel | YES | NO  | NO  | NO  |
| SPAC9G1.09    | SPAC1F7.04    | 0.3716452 | Novel | NO  | YES | NO  | YES |
| SPAC23H3.04   | SPBC1347.06c  | 0.3716173 | Novel | NO  | NO  | NO  | NO  |
| SPAC24B11.06c | SPAC9E9.13    | 0.3715841 | Novel | NO  | YES | NO  | YES |
| SPAC1565.04c  | SPAC2C4.14c   | 0.3715679 | Novel | NO  | NO  | NO  | NO  |
| SPBC1685.01   | SPBC26H8.05c  | 0.3715483 | Novel | NO  | NO  | YES | NO  |
| SPBC11B10.09  | SPCC18.05c    | 0.3715239 | Novel | NO  | NO  | NO  | NO  |
| SPAC24B11.06c | SPCC16A11.05c | 0.3714215 | Novel | NO  | NO  | NO  | YES |
| SPAPB1A11.01  | SPAC22H12.02  | 0.3714134 | Novel | NO  | NO  | NO  | NO  |
| SPCC417.06c   | SPBC17F3.02   | 0.3714047 | Novel | YES | YES | YES | NO  |
| SPBC11B10.09  | SPBC17D1.06   | 0.3713916 | Novel | NO  | YES | NO  | NO  |
| SPCC16C4.11   | SPAC16A10.04  | 0.3713836 | Novel | NO  | NO  | NO  | NO  |
| SPCC757.09c   | SPBC26H8.05c  | 0.371366  | Novel | NO  | NO  | NO  | NO  |
| SPCC576.10c   | SPCC5E4.04    | 0.3711144 | Novel | YES | NO  | NO  | NO  |
| SPAC23H3.04   | SPBC119.12    | 0.3710948 | Novel | YES | NO  | NO  | NO  |
| SPAC24C9.07c  | SPBC19F8.07   | 0.3710785 | Novel | NO  | NO  | NO  | NO  |
| SPAC2F3.15    | SPCC320.13c   | 0.3710542 | Novel | NO  | YES | NO  | YES |
| SPBC582.03    | SPAC1B2.05    | 0.3709542 | Novel | NO  | YES | NO  | YES |
| SPCC645.05c   | SPAC2C4.14c   | 0.3709311 | Novel | NO  | YES | NO  | NO  |
| SPCC16C4.11   | SPBC2F12.09c  | 0.3709285 | Novel | NO  | NO  | NO  | NO  |
| SPAC23C11.16  | SPAC16C9.07   | 0.3709059 | Novel | YES | YES | YES | NO  |
| SPAC6F6.08c   | SPCC24B10.07  | 0.3708377 | Novel | NO  | YES | NO  | NO  |
| SPBC26H8.05c  | SPAC20G4.07c  | 0.3707857 | Novel | NO  | NO  | NO  | NO  |
| SPAC23H3.04   | SPAC23D3.09   | 0.3707376 | Novel | NO  | NO  | NO  | NO  |

|               |               |           |       |     |     |     |     |
|---------------|---------------|-----------|-------|-----|-----|-----|-----|
| SPBC428.13c   | SPBC26H8.05c  | 0.3706456 | Novel | NO  | NO  | NO  | NO  |
| SPAC23H3.04   | SPAC664.11    | 0.3706415 | Novel | NO  | NO  | NO  | NO  |
| SPAC23H3.04   | SPCC965.13    | 0.3706103 | Novel | YES | NO  | NO  | NO  |
| SPBC4.05      | SPAC30D11.13  | 0.3705937 | Novel | NO  | NO  | NO  | NO  |
| SPAPB2B4.03   | SPBP16F5.04   | 0.3705748 | Novel | NO  | NO  | NO  | NO  |
| SPAC6F6.08c   | SPBC651.08c   | 0.3705576 | Novel | NO  | NO  | NO  | NO  |
| SPAC2G11.12   | SPAC1B2.05    | 0.3705522 | Novel | NO  | YES | NO  | YES |
| SPAC23H3.04   | SPBC30D10.06  | 0.3705297 | Novel | NO  | NO  | NO  | NO  |
| SPAC16A10.04  | SPBC4.07c     | 0.370338  | Novel | NO  | NO  | NO  | NO  |
| SPAC23H3.04   | SPAC6F12.13c  | 0.3702767 | Novel | NO  | NO  | NO  | NO  |
| SPAC1006.08   | SPAC2C4.14c   | 0.3702063 | Novel | YES | NO  | NO  | NO  |
| SPBC106.10    | SPAC20H4.11c  | 0.3701882 | Novel | NO  | NO  | NO  | NO  |
| SPAC6F6.08c   | SPBC17F3.02   | 0.370035  | Novel | YES | YES | NO  | NO  |
| SPCC16C4.11   | SPAC23H4.02   | 0.3699936 | Novel | NO  | YES | YES | NO  |
| SPAC16.01     | SPAC9G1.09    | 0.369958  | Novel | NO  | YES | NO  | NO  |
| SPCC31H12.05c | SPAC23H4.17c  | 0.3698451 | Novel | NO  | NO  | NO  | NO  |
| SPAC22E12.14c | SPAC110.03    | 0.3698131 | Novel | NO  | NO  | YES | NO  |
| SPAC24B11.11c | SPBC215.13    | 0.3697543 | Novel | NO  | NO  | NO  | NO  |
| SPBC1604.14c  | SPAC9E9.07c   | 0.3697075 | Novel | NO  | NO  | YES | NO  |
| SPBC21.06c    | SPBC1604.14c  | 0.3695296 | Novel | NO  | YES | YES | YES |
| SPCC4E9.02    | SPBC1198.12   | 0.3695223 | Novel | NO  | NO  | NO  | NO  |
| SPAC11E3.09   | SPAC23H4.17c  | 0.3695174 | Novel | NO  | NO  | NO  | NO  |
| SPAC16A10.04  | SPBC30B4.01c  | 0.3692897 | Novel | NO  | NO  | YES | NO  |
| SPAC1D4.13    | SPCC1223.11   | 0.3692787 | Novel | NO  | NO  | NO  | NO  |
| SPAC24B11.11c | SPAC23C11.16  | 0.36925   | Novel | YES | YES | YES | YES |
| SPAC20G8.05c  | SPAC2C4.14c   | 0.369157  | Novel | YES | NO  | NO  | NO  |
| SPCC576.15c   | SPBC1861.09   | 0.3689946 | Novel | NO  | YES | YES | NO  |
| SPBC336.04    | SPAC23H4.17c  | 0.3689106 | Novel | NO  | NO  | NO  | NO  |
| SPAC22E12.14c | SPAC20H4.11c  | 0.3689057 | Novel | NO  | NO  | NO  | NO  |
| SPAC22E12.14c | SPAC16.01     | 0.3688176 | Novel | NO  | NO  | NO  | NO  |
| SPBP19A11.02c | SPAC14C4.09   | 0.3686255 | Novel | NO  | NO  | NO  | NO  |
| SPAC19G12.14  | SPCC24B10.07  | 0.3685578 | Novel | NO  | YES | NO  | NO  |
| SPCC4G3.08    | SPCC5E4.04    | 0.3685158 | Novel | NO  | NO  | NO  | NO  |
| SPCC16C4.07   | SPBC17F3.02   | 0.3684557 | Novel | YES | NO  | NO  | NO  |
| SPAC24B11.11c | SPAC1D4.13    | 0.3684277 | Novel | NO  | YES | YES | YES |
| SPBC19G7.05c  | SPAC23H4.17c  | 0.3682121 | Novel | NO  | NO  | NO  | NO  |
| SPCC1739.12   | SPCC320.13c   | 0.3680174 | Novel | NO  | YES | NO  | NO  |
| SPBC1604.14c  | SPCC320.13c   | 0.3679857 | Novel | NO  | YES | NO  | NO  |
| SPAC1F5.10    | SPCC16A11.17  | 0.3679432 | Novel | NO  | YES | NO  | NO  |
| SPCC1322.08   | SPAC23H4.17c  | 0.3678813 | Novel | NO  | YES | YES | NO  |
| SPCC576.10c   | SPBC887.04c   | 0.3678324 | Novel | YES | NO  | NO  | NO  |
| SPAC24B11.11c | SPAC22E12.14c | 0.3677213 | Novel | NO  | YES | YES | NO  |
| SPAC31G5.09c  | SPBC649.05    | 0.3676936 | Novel | NO  | NO  | NO  | NO  |
| SPCC417.06c   | SPAC2C4.14c   | 0.3675965 | Novel | NO  | YES | YES | NO  |
| SPCC16C4.11   | SPBC29B5.01   | 0.3675132 | Novel | NO  | YES | NO  | NO  |
| SPAC23H3.04   | SPAC1805.05   | 0.3674414 | Novel | NO  | NO  | NO  | NO  |
| SPAC1F5.09c   | SPAC23H4.17c  | 0.3673516 | Novel | NO  | YES | YES | NO  |

|               |               |           |       |     |     |     |     |
|---------------|---------------|-----------|-------|-----|-----|-----|-----|
| SPBC660.14    | SPBC11B10.09  | 0.3672969 | Novel | NO  | YES | YES | YES |
| SPBC11B10.09  | SPAC20H4.11c  | 0.3672642 | Novel | NO  | NO  | NO  | NO  |
| SPAC57A7.08   | SPBC18H10.15  | 0.3671908 | Novel | NO  | NO  | YES | NO  |
| SPAC24B11.06c | SPBC1734.14c  | 0.3671825 | Novel | NO  | NO  | NO  | YES |
| SPCC16C4.11   | SPBP8B7.16c   | 0.3671686 | Novel | NO  | YES | NO  | NO  |
| SPAC1805.15c  | SPBC16A3.05c  | 0.3671355 | Novel | NO  | NO  | NO  | NO  |
| SPAC1F7.04    | SPBP16F5.04   | 0.3671239 | Novel | NO  | NO  | NO  | NO  |
| SPCC5E4.04    | SPAC1687.15   | 0.3671197 | Novel | NO  | NO  | NO  | NO  |
| SPAC22E12.14c | SPBC543.07    | 0.3670348 | Novel | NO  | YES | YES | NO  |
| SPBC1289.13c  | SPCC736.04c   | 0.3668334 | Novel | YES | YES | YES | NO  |
| SPAC1B2.05    | SPAC8F11.07c  | 0.3668322 | Novel | NO  | YES | NO  | YES |
| SPBC543.07    | SPAC24H6.05   | 0.3667275 | Novel | YES | NO  | NO  | NO  |
| SPAC31G5.09c  | SPBC342.05    | 0.366682  | Novel | NO  | NO  | NO  | NO  |
| SPCC320.13c   | SPAC821.08c   | 0.3666108 | Novel | YES | YES | YES | NO  |
| SPAPB2B4.03   | SPBC1105.09   | 0.3664506 | Novel | NO  | NO  | NO  | NO  |
| SPAC2G11.12   | SPCC1682.02c  | 0.3664479 | Novel | NO  | YES | NO  | YES |
| SPCC576.15c   | SPBC11B10.09  | 0.3663603 | Novel | NO  | YES | YES | NO  |
| SPCC1259.15c  | SPAC664.01c   | 0.3663142 | Novel | NO  | NO  | NO  | NO  |
| SPBC119.08    | SPAC19E9.02   | 0.3662962 | Novel | NO  | YES | YES | NO  |
| SPBC1711.05   | SPAC23H3.04   | 0.3662521 | Novel | NO  | NO  | NO  | NO  |
| SPAC31G5.09c  | SPCC1322.12c  | 0.3660996 | Novel | NO  | YES | YES | NO  |
| SPBC18H10.15  | SPAC2F3.15    | 0.3660743 | Novel | NO  | YES | NO  | NO  |
| SPAC24B11.06c | SPAC29B12.03  | 0.3660606 | Novel | YES | YES | YES | YES |
| SPAC23H3.04   | SPBC29A10.17  | 0.3660563 | Novel | NO  | NO  | YES | NO  |
| SPBC660.14    | SPAC24B11.06c | 0.3660358 | Novel | NO  | YES | YES | YES |
| SPBC713.06    | SPCC1259.13   | 0.3660128 | Novel | NO  | YES | NO  | NO  |
| SPCC1223.06   | SPAC9E9.07c   | 0.365978  | Novel | NO  | NO  | NO  | NO  |
| SPCC576.10c   | SPAC20H4.11c  | 0.36594   | Novel | NO  | NO  | NO  | NO  |
| SPBC543.07    | SPAC1B9.02c   | 0.3659141 | Novel | NO  | YES | YES | NO  |
| SPAC821.12    | SPCC320.13c   | 0.3657474 | Novel | NO  | YES | NO  | NO  |
| SPAC9G1.09    | SPAC20H4.11c  | 0.3657165 | Novel | NO  | NO  | NO  | NO  |
| SPAC24B11.11c | SPBC119.08    | 0.3656463 | Novel | NO  | YES | YES | YES |
| SPAC16C9.07   | SPCC1739.11c  | 0.3656188 | Novel | YES | NO  | NO  | NO  |
| SPBC342.05    | SPAC23H4.17c  | 0.3655632 | Novel | NO  | NO  | NO  | NO  |
| SPAC6B12.15   | SPAC21E11.03c | 0.3654773 | Novel | NO  | NO  | NO  | NO  |
| SPACUNK12.02c | SPAC664.07c   | 0.365448  | Novel | NO  | NO  | NO  | NO  |
| SPBC14C8.07c  | SPAC23H4.17c  | 0.3654407 | Novel | NO  | YES | NO  | NO  |
| SPCC24B10.07  | SPAC1F5.08c   | 0.3653884 | Novel | NO  | NO  | NO  | NO  |
| SPAC6B12.15   | SPAC8C9.03    | 0.3653858 | Novel | NO  | NO  | NO  | YES |
| SPCC4B3.15    | SPAC16C9.07   | 0.3652721 | Novel | NO  | NO  | NO  | NO  |
| SPCC364.02c   | SPAC25H1.06   | 0.3652428 | Novel | NO  | NO  | NO  | NO  |
| SPAC24B11.06c | SPAC1B9.02c   | 0.3651717 | Novel | NO  | YES | YES | YES |
| SPCC576.10c   | SPAC343.09    | 0.365169  | Novel | NO  | NO  | NO  | NO  |
| SPBC9B6.05c   | SPAC644.12    | 0.3651395 | Novel | YES | NO  | YES | NO  |
| SPCC16C4.11   | SPAC11G7.02   | 0.3650329 | Novel | NO  | NO  | NO  | NO  |
| SPCC576.10c   | SPBC14C8.01c  | 0.3649799 | Novel | NO  | NO  | NO  | NO  |
| SPCC576.10c   | SPAC2C4.15c   | 0.3649709 | Novel | YES | NO  | YES | NO  |



|               |               |           |       |     |     |     |     |
|---------------|---------------|-----------|-------|-----|-----|-----|-----|
| SPBC9B6.05c   | SPBC6B1.07    | 0.364941  | Novel | YES | NO  | YES | NO  |
| SPBC21.06c    | SPBC1D7.05    | 0.3649329 | Novel | NO  | YES | YES | YES |
| SPAC16A10.04  | SPAC1250.03   | 0.3648497 | Novel | NO  | NO  | NO  | NO  |
| SPBC354.03    | SPBC409.07c   | 0.3648048 | Novel | NO  | NO  | NO  | NO  |
| SPACUNK12.02c | SPBC119.08    | 0.36478   | Novel | NO  | YES | YES | NO  |
| SPAC6B12.15   | SPAC644.12    | 0.3646502 | Novel | NO  | YES | NO  | NO  |
| SPAC823.03    | SPAC4A8.15c   | 0.364635  | Novel | NO  | NO  | NO  | NO  |
| SPAC6B12.15   | SPAC2C4.14c   | 0.3645745 | Novel | NO  | NO  | NO  | NO  |
| SPAC664.10    | SPBC20F10.06  | 0.3644982 | Novel | YES | NO  | NO  | NO  |
| SPAC17H9.09c  | SPAC22F3.13   | 0.3644205 | Novel | NO  | NO  | YES | YES |
| SPBC582.03    | SPAC6B12.15   | 0.3644031 | Novel | NO  | YES | YES | NO  |
| SPCC18B5.03   | SPAC14C4.03   | 0.3643258 | Novel | NO  | YES | NO  | YES |
| SPAC821.04c   | SPAC23H4.17c  | 0.3642981 | Novel | NO  | YES | NO  | NO  |
| SPAC23H3.04   | SPAC20G8.08c  | 0.3641597 | Novel | NO  | NO  | NO  | NO  |
| SPAC1D4.13    | SPAC1F5.09c   | 0.3640542 | Novel | NO  | YES | YES | YES |
| SPCC1259.15c  | SPBC428.08c   | 0.3640175 | Novel | NO  | NO  | NO  | NO  |
| SPAC823.03    | SPBC32H8.12c  | 0.3639904 | Novel | YES | YES | NO  | NO  |
| SPAC17H9.09c  | SPAC630.13c   | 0.3639621 | Novel | NO  | NO  | YES | YES |
| SPAC8E11.02c  | SPAC2C4.14c   | 0.3639232 | Novel | YES | NO  | NO  | NO  |
| SPAC9E9.07c   | SPBC354.05c   | 0.3638771 | Novel | NO  | NO  | NO  | NO  |
| SPAC1006.09   | SPAC2C4.14c   | 0.3638341 | Novel | NO  | YES | YES | NO  |
| SPBC16A3.05c  | SPAC1006.07   | 0.3638223 | Novel | NO  | NO  | NO  | NO  |
| SPAC9E9.07c   | SPAC1B3.11c   | 0.3638186 | Novel | NO  | YES | YES | NO  |
| SPAC6B12.15   | SPAC23H4.18c  | 0.3637905 | Novel | YES | YES | NO  | NO  |
| SPBC713.06    | SPAC31A2.05c  | 0.3637887 | Novel | NO  | NO  | NO  | NO  |
| SPAC23H3.04   | SPAC1006.07   | 0.363779  | Novel | NO  | NO  | NO  | NO  |
| SPAC824.04    | SPCC306.04c   | 0.3637573 | Novel | NO  | NO  | NO  | NO  |
| SPCC417.06c   | SPCC188.12    | 0.3636547 | Novel | NO  | NO  | NO  | NO  |
| SPCC16C4.11   | SPAPYUG7.02c  | 0.3636217 | Novel | NO  | YES | NO  | NO  |
| SPBC646.12c   | SPAC9E9.07c   | 0.3635463 | Novel | NO  | NO  | NO  | NO  |
| SPACUNK12.02c | SPBC216.05    | 0.363539  | Novel | NO  | YES | NO  | NO  |
| SPAC31G5.09c  | SPBC1D7.05    | 0.3634163 | Novel | NO  | YES | YES | YES |
| SPAC17C9.10   | SPAC9E9.07c   | 0.3633912 | Novel | NO  | NO  | NO  | NO  |
| SPBC8D2.01    | SPBC19F8.07   | 0.3633646 | Novel | YES | YES | YES | NO  |
| SPCC1259.15c  | SPAC22H12.02  | 0.3633442 | Novel | NO  | NO  | NO  | YES |
| SPAC23H3.04   | SPBC18H10.02  | 0.3632477 | Novel | NO  | NO  | NO  | NO  |
| SPAC27F1.02c  | SPAC16C9.07   | 0.3631889 | Novel | YES | NO  | NO  | NO  |
| SPAC6B12.15   | SPBC18H10.06c | 0.3631732 | Novel | NO  | NO  | NO  | NO  |
| SPAC824.04    | SPCC18.11c    | 0.363078  | Novel | NO  | NO  | NO  | NO  |
| SPAC6F12.15c  | SPBC337.08c   | 0.3629857 | Novel | NO  | NO  | YES | YES |
| SPBC582.06c   | SPAC23H3.04   | 0.3629773 | Novel | NO  | NO  | NO  | NO  |
| SPCC31H12.05c | SPAC1639.02c  | 0.3629635 | Novel | NO  | NO  | NO  | NO  |
| SPCC1259.15c  | SPAC30D11.10  | 0.3629582 | Novel | NO  | NO  | NO  | NO  |
| SPBC24C6.07   | SPBC651.08c   | 0.3628985 | Novel | NO  | NO  | NO  | NO  |
| SPAC6B12.15   | SPBC29B5.01   | 0.3628978 | Novel | NO  | YES | NO  | NO  |
| SPBC19C2.09   | SPAC9E9.07c   | 0.362889  | Novel | NO  | NO  | NO  | NO  |
| SPAC17A2.13c  | SPAC14C4.03   | 0.3628117 | Novel | NO  | NO  | NO  | YES |

|               |               |           |       |     |     |     |     |
|---------------|---------------|-----------|-------|-----|-----|-----|-----|
| SPAC23H3.04   | SPAC4F10.20   | 0.3627594 | Novel | NO  | NO  | NO  | NO  |
| SPBC1D7.05    | SPAC17G8.14c  | 0.3627112 | Novel | NO  | YES | YES | NO  |
| SPBC4.04c     | SPAC1F5.10    | 0.3626272 | Novel | NO  | YES | NO  | NO  |
| SPBC685.09    | SPAC23H4.17c  | 0.362601  | Novel | NO  | NO  | NO  | NO  |
| SPAC823.03    | SPBC4F6.06    | 0.3625969 | Novel | YES | YES | YES | NO  |
| SPBC12D12.01  | SPAC2C4.14c   | 0.3625883 | Novel | NO  | NO  | NO  | NO  |
| SPAC22H10.10  | SPBC32F12.04  | 0.3625883 | Novel | NO  | NO  | NO  | YES |
| SPAC23H3.04   | SPAC20H4.09   | 0.3625582 | Novel | NO  | NO  | NO  | NO  |
| SPAC6B12.15   | SPBC3B8.02    | 0.362378  | Novel | YES | NO  | NO  | NO  |
| SPBC4F6.06    | SPAC16C9.07   | 0.3622758 | Novel | YES | YES | YES | NO  |
| SPAC24B11.11c | SPBC1D7.05    | 0.3622502 | Novel | NO  | YES | YES | YES |
| SPBC25D12.03c | SPCC5E4.04    | 0.3621837 | Novel | NO  | NO  | NO  | YES |
| SPCC1259.13   | SPAC2C4.14c   | 0.3621182 | Novel | NO  | YES | YES | NO  |
| SPAC823.03    | SPBC1706.01   | 0.3618901 | Novel | NO  | NO  | NO  | NO  |
| SPAC9E9.07c   | SPAC1565.04c  | 0.3618897 | Novel | NO  | NO  | NO  | NO  |
| SPAC15A10.03c | SPAC31G5.09c  | 0.3617866 | Novel | NO  | YES | NO  | NO  |
| SPCC1739.12   | SPBC18H10.15  | 0.3616805 | Novel | NO  | NO  | NO  | NO  |
| SPAC23H3.04   | SPAC6B12.05c  | 0.3616375 | Novel | NO  | NO  | NO  | NO  |
| SPCC970.04c   | SPCC24B10.07  | 0.3615919 | Novel | NO  | YES | YES | NO  |
| SPBC32H8.10   | SPAC23H4.17c  | 0.3615731 | Novel | NO  | YES | YES | NO  |
| SPAC2G11.06   | SPCC5E4.04    | 0.3615645 | Novel | YES | NO  | NO  | NO  |
| SPAC824.04    | SPCC594.05c   | 0.3615444 | Novel | NO  | NO  | NO  | NO  |
| SPAC1782.09c  | SPCC4G3.08    | 0.3615039 | Novel | NO  | NO  | NO  | NO  |
| SPAC1D4.13    | SPAC1687.15   | 0.3614638 | Novel | NO  | YES | YES | NO  |
| SPAC824.04    | SPBC342.05    | 0.3614432 | Novel | NO  | NO  | NO  | NO  |
| SPBC16E9.11c  | SPBC11B10.09  | 0.3614381 | Novel | NO  | NO  | NO  | NO  |
| SPAPB2B4.03   | SPAC1B2.05    | 0.361346  | Novel | NO  | YES | NO  | YES |
| SPAC23H3.04   | SPAC1783.06c  | 0.3611676 | Novel | NO  | NO  | NO  | NO  |
| SPAC16A10.04  | SPBC19F8.07   | 0.3611551 | Novel | NO  | NO  | NO  | NO  |
| SPAC17H9.09c  | SPBC30D10.10c | 0.3611226 | Novel | NO  | NO  | YES | NO  |
| SPAC18G6.07c  | SPAC9E9.07c   | 0.3610172 | Novel | NO  | NO  | NO  | NO  |
| SPBC1D7.05    | SPBC19F8.07   | 0.360987  | Novel | YES | YES | YES | NO  |
| SPAC23H3.04   | SPBC3F6.01c   | 0.3609573 | Novel | NO  | NO  | NO  | NO  |
| SPAC23H3.04   | SPBC32C12.03c | 0.3608911 | Novel | NO  | NO  | NO  | NO  |
| SPBC24C6.07   | SPBC17F3.02   | 0.3607186 | Novel | YES | YES | YES | NO  |
| SPAC9G1.09    | SPAC23A1.06c  | 0.3607016 | Novel | NO  | YES | YES | NO  |
| SPAC23A1.06c  | SPBC8D2.01    | 0.3606653 | Novel | YES | YES | YES | NO  |
| SPAC17A2.09c  | SPBC19F8.07   | 0.3606511 | Novel | YES | NO  | NO  | NO  |
| SPAC31G5.09c  | SPBC29A10.15  | 0.3606257 | Novel | NO  | YES | NO  | NO  |
| SPAC23H3.04   | SPBC16E9.12c  | 0.3605848 | Novel | NO  | NO  | NO  | NO  |
| SPCC4G3.08    | SPAC17G8.14c  | 0.3605066 | Novel | NO  | YES | YES | NO  |
| SPAPYUG7.02c  | SPBC19F8.07   | 0.3604705 | Novel | NO  | NO  | NO  | NO  |
| SPBC1A4.02c   | SPBC19F8.07   | 0.3604359 | Novel | NO  | NO  | NO  | NO  |
| SPAC23H3.04   | SPCC1919.01   | 0.3603921 | Novel | NO  | NO  | NO  | NO  |
| SPAC1F3.02c   | SPBC18H10.15  | 0.3603375 | Novel | NO  | YES | YES | NO  |
| SPAC6B12.15   | SPAC644.04    | 0.3603008 | Novel | NO  | YES | NO  | YES |
| SPAC6B12.15   | SPAC630.14c   | 0.3602846 | Novel | YES | YES | NO  | NO  |

|               |               |           |       |     |     |     |     |
|---------------|---------------|-----------|-------|-----|-----|-----|-----|
| SPBC32H8.12c  | SPAC16C9.07   | 0.3601935 | Novel | YES | YES | NO  | NO  |
| SPAC4F10.15c  | SPAC1F7.04    | 0.3601438 | Novel | YES | YES | NO  | NO  |
| SPBC21.06c    | SPAC9E9.07c   | 0.3601066 | Novel | NO  | NO  | NO  | NO  |
| SPBC6B1.07    | SPAC1F5.10    | 0.3600301 | Novel | NO  | NO  | NO  | NO  |
| SPAC1F7.04    | SPCC4G3.08    | 0.3600267 | Novel | NO  | NO  | NO  | NO  |
| SPBC32F12.06  | SPAC2F3.15    | 0.3599745 | Novel | NO  | NO  | NO  | NO  |
| SPBC21.05c    | SPAC9E9.07c   | 0.3599186 | Novel | NO  | NO  | NO  | NO  |
| SPBC11B10.09  | SPAC22F3.03c  | 0.3598757 | Novel | NO  | YES | NO  | NO  |
| SPAC24B11.06c | SPAC688.02c   | 0.3598604 | Novel | NO  | YES | NO  | NO  |
| SPAC13D6.02c  | SPAC9E9.07c   | 0.3598066 | Novel | NO  | NO  | NO  | NO  |
| SPBC19C7.09c  | SPBC337.08c   | 0.3597321 | Novel | NO  | NO  | NO  | YES |
| SPCC1223.06   | SPAC16C9.07   | 0.3597153 | Novel | YES | NO  | NO  | NO  |
| SPCC16C4.11   | SPAC1783.07c  | 0.3596463 | Novel | NO  | NO  | NO  | NO  |
| SPAC16C9.07   | SPAC4A8.15c   | 0.3596038 | Novel | NO  | NO  | NO  | NO  |
| SPBC21.06c    | SPCC18B5.11c  | 0.3595637 | Novel | NO  | YES | YES | NO  |
| SPBC11B10.09  | SPAC14C4.03   | 0.3594842 | Novel | NO  | YES | YES | YES |
| SPBC216.07c   | SPAC17H9.09c  | 0.35945   | Novel | NO  | NO  | NO  | YES |
| SPAC15A10.03c | SPAC23H4.17c  | 0.3594375 | Novel | NO  | YES | NO  | NO  |
| SPCC1795.11   | SPAC1B2.05    | 0.3593616 | Novel | YES | YES | NO  | YES |
| SPBC19C2.05   | SPBC17F3.02   | 0.3593174 | Novel | YES | YES | YES | NO  |
| SPBC119.08    | SPCC4G3.08    | 0.3592659 | Novel | NO  | YES | YES | NO  |
| SPAC17A2.13c  | SPBC32C12.03c | 0.3592659 | Novel | NO  | NO  | NO  | NO  |
| SPBC1718.01   | SPAC23H4.17c  | 0.3592601 | Novel | NO  | NO  | NO  | NO  |
| SPAC17A2.13c  | SPAC2C4.14c   | 0.3592592 | Novel | YES | NO  | NO  | NO  |
| SPCC16C4.11   | SPAC17H9.09c  | 0.3592379 | Novel | NO  | NO  | NO  | NO  |
| SPBC2F12.09c  | SPBC19F8.07   | 0.3591301 | Novel | NO  | NO  | NO  | NO  |
| SPACUNK12.02c | SPCC338.16    | 0.3590922 | Novel | NO  | NO  | NO  | NO  |
| SPBC16E9.15   | SPAC23H3.04   | 0.3590618 | Novel | NO  | NO  | NO  | NO  |
| SPBC4.07c     | SPAC23C4.08   | 0.3590496 | Novel | NO  | YES | NO  | NO  |
| SPCC16C4.09   | SPCC1919.01   | 0.3590016 | Novel | NO  | NO  | NO  | NO  |
| SPAC823.15    | SPBC18H10.15  | 0.3589391 | Novel | NO  | NO  | YES | NO  |
| SPAC6B12.15   | SPAPB2B4.03   | 0.3589243 | Novel | NO  | YES | YES | YES |
| SPCC18B5.11c  | SPBC1604.14c  | 0.3588622 | Novel | YES | YES | YES | YES |
| SPBC19F8.07   | SPAC11G7.02   | 0.3587668 | Novel | YES | NO  | YES | NO  |
| SPAC4D7.05    | SPAC23H4.17c  | 0.3587665 | Novel | NO  | NO  | NO  | NO  |
| SPAC31G5.09c  | SPAC821.12    | 0.3586465 | Novel | NO  | YES | YES | NO  |
| SPAC23H3.04   | SPAC9E9.12c   | 0.3586436 | Novel | YES | NO  | NO  | NO  |
| SPBC16A3.05c  | SPAC1F5.10    | 0.3586386 | Novel | NO  | NO  | NO  | NO  |
| SPCC16C4.11   | SPCC16C4.07   | 0.3586057 | Novel | NO  | NO  | NO  | NO  |
| SPBC1D7.05    | SPBC12D12.04c | 0.3585836 | Novel | NO  | YES | YES | YES |
| SPAC19B12.03  | SPBC19F8.07   | 0.3585687 | Novel | YES | NO  | NO  | NO  |
| SPAC1805.17   | SPBC19F8.07   | 0.358339  | Novel | NO  | NO  | NO  | NO  |
| SPAC23H3.04   | SPAC24C9.15c  | 0.3582827 | Novel | NO  | NO  | NO  | NO  |
| SPCC1259.13   | SPAC1006.07   | 0.358232  | Novel | NO  | YES | NO  | NO  |
| SPBC24C6.07   | SPAC16C9.07   | 0.3582027 | Novel | NO  | NO  | NO  | NO  |
| SPAC823.15    | SPCC24B10.07  | 0.3581818 | Novel | NO  | NO  | NO  | NO  |
| SPAC6B12.15   | SPAC23H3.05c  | 0.3581593 | Novel | NO  | NO  | NO  | NO  |

|               |               |           |       |     |     |     |     |
|---------------|---------------|-----------|-------|-----|-----|-----|-----|
| SPCC24B10.07  | SPAC2C4.14c   | 0.3581446 | Novel | NO  | YES | YES | NO  |
| SPBC106.10    | SPAC2C4.14c   | 0.3581056 | Novel | NO  | YES | YES | NO  |
| SPAC589.10c   | SPAC6G10.11c  | 0.3580794 | Novel | YES | YES | YES | NO  |
| SPAPB1A10.10c | SPAC9E9.07c   | 0.3580637 | Novel | NO  | YES | YES | NO  |
| SPAC926.04c   | SPAC23H4.17c  | 0.3580237 | Novel | NO  | YES | NO  | NO  |
| SPAC6F6.15    | SPAC1B3.11c   | 0.3579942 | Novel | NO  | YES | YES | NO  |
| SPBC19F8.07   | SPBC29B5.01   | 0.3579941 | Novel | NO  | NO  | NO  | NO  |
| SPCC16C4.11   | SPAC1952.07   | 0.3579534 | Novel | NO  | YES | NO  | NO  |
| SPAC2F3.15    | SPCC1322.08   | 0.3578602 | Novel | NO  | YES | NO  | NO  |
| SPAC17G8.09   | SPAC824.04    | 0.3577697 | Novel | NO  | NO  | NO  | NO  |
| SPAC823.03    | SPCC1223.06   | 0.3577205 | Novel | YES | NO  | NO  | NO  |
| SPAC29A4.02c  | SPAC23H4.17c  | 0.3576038 | Novel | NO  | NO  | NO  | NO  |
| SPAC23H3.04   | SPBC8D2.11    | 0.3575714 | Novel | NO  | NO  | YES | NO  |
| SPBC1D7.04    | SPAC1F5.10    | 0.3575407 | Novel | NO  | NO  | NO  | NO  |
| SPAC9E9.13    | SPAC23H4.17c  | 0.3574653 | Novel | NO  | NO  | NO  | NO  |
| SPAC24B11.11c | SPBC30B4.01c  | 0.3574399 | Novel | NO  | NO  | NO  | NO  |
| SPAC22E12.14c | SPBC1604.14c  | 0.3574015 | Novel | NO  | YES | YES | NO  |
| SPBC1718.01   | SPBC354.03    | 0.3573847 | Novel | NO  | NO  | NO  | NO  |
| SPBC106.10    | SPBC19F8.07   | 0.3573318 | Novel | YES | YES | YES | NO  |
| SPAC23H3.04   | SPAC29E6.01   | 0.3573018 | Novel | NO  | NO  | NO  | NO  |
| SPAC824.04    | SPBC13G1.08c  | 0.35729   | Novel | NO  | NO  | NO  | NO  |
| SPAC22E12.14c | SPAC24B11.06c | 0.3571891 | Novel | NO  | YES | YES | YES |
| SPCC1322.08   | SPAC2C4.14c   | 0.3571207 | Novel | NO  | YES | YES | NO  |
| SPAC57A10.02  | SPAC2F3.15    | 0.3570299 | Novel | NO  | YES | NO  | NO  |
| SPAC23H3.04   | SPBP35G2.05c  | 0.3569389 | Novel | NO  | NO  | NO  | NO  |
| SPAC22E12.14c | SPAC9G1.09    | 0.356784  | Novel | NO  | YES | YES | NO  |
| SPCC1795.11   | SPAC23H4.17c  | 0.3566662 | Novel | NO  | YES | NO  | NO  |
| SPAC16A10.04  | SPCC320.13c   | 0.3565606 | Novel | NO  | NO  | NO  | NO  |
| SPAC823.03    | SPBC800.05c   | 0.3564191 | Novel | NO  | NO  | NO  | NO  |
| SPCC18B5.06   | SPAC23A1.10   | 0.3563758 | Novel | NO  | NO  | NO  | NO  |
| SPCC18B5.06   | SPCC794.09c   | 0.3563758 | Novel | NO  | NO  | NO  | NO  |
| SPCC18B5.06   | SPBC839.15c   | 0.3563758 | Novel | NO  | NO  | NO  | NO  |
| SPAC1834.01   | SPAC23A1.10   | 0.3562884 | Novel | NO  | NO  | NO  | NO  |
| SPAC1834.01   | SPCC794.09c   | 0.3562884 | Novel | NO  | NO  | NO  | NO  |
| SPAC1834.01   | SPBC839.15c   | 0.3562884 | Novel | NO  | NO  | NO  | NO  |
| SPAC1805.15c  | SPAC4F10.13c  | 0.3562664 | Novel | YES | NO  | NO  | NO  |
| SPBC651.08c   | SPBC14F5.08   | 0.3562435 | Novel | NO  | NO  | NO  | NO  |
| SPAC31G5.09c  | SPAC2F3.15    | 0.3562348 | Novel | NO  | YES | NO  | NO  |
| SPAC16.01     | SPCC4G3.08    | 0.3562277 | Novel | NO  | NO  | NO  | NO  |
| SPCC794.09c   | SPAC8F11.07c  | 0.3562114 | Novel | NO  | NO  | NO  | NO  |
| SPAC23A1.10   | SPAC8F11.07c  | 0.3562114 | Novel | NO  | NO  | NO  | NO  |
| SPBC839.15c   | SPAC8F11.07c  | 0.3562114 | Novel | NO  | NO  | NO  | NO  |
| SPBC543.07    | SPAC23H4.17c  | 0.3561265 | Novel | NO  | YES | YES | NO  |
| SPBC16H5.11c  | SPAC23H4.17c  | 0.3561149 | Novel | NO  | NO  | NO  | NO  |
| SPAC6G10.02c  | SPAC16C9.07   | 0.3559952 | Novel | YES | NO  | NO  | NO  |
| SPBP4H10.04   | SPBC18H10.15  | 0.3559811 | Novel | NO  | NO  | YES | NO  |
| SPAC823.03    | SPBC26H8.07c  | 0.355978  | Novel | NO  | NO  | NO  | NO  |

|               |               |           |       |     |     |     |     |
|---------------|---------------|-----------|-------|-----|-----|-----|-----|
| SPBC106.10    | SPBC1604.14c  | 0.3559758 | Novel | NO  | YES | YES | NO  |
| SPAC6B12.15   | SPCC18.11c    | 0.3559699 | Novel | NO  | NO  | NO  | NO  |
| SPAC110.03    | SPCC4G3.08    | 0.3559141 | Novel | NO  | NO  | NO  | NO  |
| SPAC1805.15c  | SPBC26H8.01   | 0.3557587 | Novel | NO  | NO  | NO  | NO  |
| SPAC823.03    | SPAC27F1.02c  | 0.3557227 | Novel | NO  | NO  | NO  | NO  |
| SPBC1706.01   | SPAC16C9.07   | 0.3556931 | Novel | NO  | NO  | NO  | NO  |
| SPAC6B12.11   | SPAC23H4.17c  | 0.3556575 | Novel | NO  | NO  | NO  | NO  |
| SPAC18B11.10  | SPAC6B12.15   | 0.3556303 | Novel | NO  | YES | NO  | NO  |
| SPBC19C7.03   | SPBC1861.09   | 0.3555931 | Novel | NO  | YES | NO  | NO  |
| SPCC4G3.08    | SPAC20H4.11c  | 0.355552  | Novel | NO  | NO  | NO  | NO  |
| SPBC354.03    | SPBC23E6.09   | 0.3554914 | Novel | NO  | NO  | NO  | NO  |
| SPCC16C4.11   | SPAC4D7.03    | 0.3554751 | Novel | NO  | YES | NO  | NO  |
| SPAC1783.07c  | SPBC19F8.07   | 0.3553922 | Novel | YES | NO  | NO  | NO  |
| SPAC23H3.04   | SPAC977.09c   | 0.3553745 | Novel | NO  | NO  | NO  | NO  |
| SPBC1348.10c  | SPAC23H3.04   | 0.3553745 | Novel | NO  | NO  | NO  | NO  |
| SPBC8D2.01    | SPCC1322.08   | 0.3553638 | Novel | YES | YES | YES | NO  |
| SPBC646.13    | SPAC23H4.17c  | 0.3553502 | Novel | NO  | NO  | NO  | NO  |
| SPAC23H3.04   | SPCC162.10    | 0.3553268 | Novel | NO  | NO  | NO  | NO  |
| SPBC1718.07c  | SPBC17F3.02   | 0.3552442 | Novel | NO  | YES | NO  | NO  |
| SPAC31G5.09c  | SPAC144.13c   | 0.3551838 | Novel | NO  | NO  | NO  | NO  |
| SPAC9G1.09    | SPBC16H5.11c  | 0.3551698 | Novel | NO  | YES | NO  | NO  |
| SPAC17C9.11c  | SPAC23H3.04   | 0.3551158 | Novel | NO  | NO  | NO  | NO  |
| SPBC216.07c   | SPAC1B9.02c   | 0.3550984 | Novel | NO  | YES | NO  | NO  |
| SPBC106.10    | SPBC1861.09   | 0.3550656 | Novel | NO  | YES | YES | NO  |
| SPBC32F12.04  | SPBC32H8.12c  | 0.3549917 | Novel | NO  | NO  | NO  | YES |
| SPAC23H3.04   | SPAC1786.02   | 0.3547415 | Novel | NO  | NO  | NO  | NO  |
| SPCC16C4.11   | SPAC630.14c   | 0.3545826 | Novel | NO  | YES | NO  | NO  |
| SPCC576.15c   | SPCC18B5.11c  | 0.3544301 | Novel | NO  | YES | YES | NO  |
| SPBP35G2.05c  | SPBC1347.06c  | 0.3543844 | Novel | NO  | YES | YES | NO  |
| SPAC823.03    | SPAC6G10.02c  | 0.3541811 | Novel | NO  | NO  | NO  | NO  |
| SPAC29B12.03  | SPAC23H4.17c  | 0.3541542 | Novel | NO  | NO  | NO  | NO  |
| SPAC29B12.02c | SPBC651.08c   | 0.3541235 | Novel | NO  | NO  | NO  | NO  |
| SPBC244.01c   | SPBC17F3.02   | 0.3541218 | Novel | YES | YES | YES | NO  |
| SPCC1682.02c  | SPAC8F11.07c  | 0.3540987 | Novel | NO  | NO  | NO  | YES |
| SPCC1682.02c  | SPCC1795.11   | 0.35405   | Novel | NO  | YES | NO  | YES |
| SPBC2F12.08c  | SPBC651.08c   | 0.3539818 | Novel | NO  | NO  | NO  | NO  |
| SPBC651.08c   | SPAC644.04    | 0.3539749 | Novel | NO  | NO  | NO  | NO  |
| SPCC1259.15c  | SPAPB2B4.03   | 0.3539744 | Novel | NO  | NO  | YES | NO  |
| SPAC823.03    | SPCC4B3.15    | 0.3539282 | Novel | NO  | NO  | NO  | NO  |
| SPAC24B11.11c | SPAC1B9.02c   | 0.3539249 | Novel | NO  | YES | YES | NO  |
| SPCC1753.02c  | SPBC106.10    | 0.3538941 | Novel | NO  | NO  | YES | YES |
| SPCC16C4.11   | SPBC4F6.06    | 0.3538889 | Novel | NO  | YES | YES | NO  |
| SPBC651.08c   | SPBP23A10.14c | 0.3538835 | Novel | NO  | NO  | NO  | NO  |
| SPAC19B12.05c | SPBC651.08c   | 0.3538807 | Novel | NO  | YES | NO  | NO  |
| SPBC18H10.04c | SPAC2C4.14c   | 0.3538759 | Novel | NO  | NO  | NO  | NO  |
| SPAC2F7.03c   | SPCC320.13c   | 0.353849  | Novel | NO  | YES | NO  | NO  |
| SPAC23G3.01   | SPBC651.08c   | 0.3538249 | Novel | NO  | YES | NO  | NO  |

|               |               |           |       |     |     |     |    |
|---------------|---------------|-----------|-------|-----|-----|-----|----|
| SPAC23H3.04   | SPAC19G12.16c | 0.3537933 | Novel | NO  | NO  | YES | NO |
| SPBC32H8.10   | SPBC119.08    | 0.3537889 | Novel | NO  | YES | YES | NO |
| SPBC12D12.04c | SPCC4G3.08    | 0.3537832 | Novel | NO  | YES | YES | NO |
| SPCC24B10.07  | SPBC16H5.07c  | 0.3537534 | Novel | NO  | NO  | NO  | NO |
| SPBC30D10.06  | SPAC19A8.13   | 0.3537109 | Novel | NO  | NO  | YES | NO |
| SPBC651.08c   | SPAC23C4.15   | 0.353694  | Novel | YES | YES | YES | NO |
| SPAC17C9.05c  | SPBC651.08c   | 0.3536887 | Novel | NO  | NO  | NO  | NO |
| SPACUNK12.02c | SPBC25D12.03c | 0.3536489 | Novel | NO  | YES | NO  | NO |
| SPBC651.08c   | SPCC1442.10c  | 0.3536288 | Novel | NO  | YES | NO  | NO |
| SPCC4E9.02    | SPAC23H3.04   | 0.3536183 | Novel | NO  | NO  | NO  | NO |
| SPCC162.10    | SPBC119.08    | 0.3535941 | Novel | NO  | YES | YES | NO |
| SPCC757.09c   | SPBC11B10.09  | 0.3535525 | Novel | NO  | YES | NO  | NO |
| SPCC1672.08c  | SPBC651.08c   | 0.3534865 | Novel | NO  | YES | NO  | NO |
| SPBC776.02c   | SPAC1639.02c  | 0.3533983 | Novel | NO  | NO  | NO  | NO |
| SPCC1020.04c  | SPBC651.08c   | 0.3533887 | Novel | YES | YES | YES | NO |
| SPCC24B10.07  | SPCC4G3.08    | 0.3533857 | Novel | NO  | YES | YES | NO |
| SPCC417.06c   | SPAPB18E9.04c | 0.3533529 | Novel | NO  | NO  | NO  | NO |
| SPBC32H8.07   | SPBC24C6.06   | 0.3533451 | Novel | YES | YES | YES | NO |
| SPAC23H3.04   | SPCC1235.05c  | 0.3533267 | Novel | NO  | NO  | NO  | NO |
| SPAC24B11.06c | SPBC32C12.03c | 0.3533078 | Novel | NO  | YES | YES | NO |
| SPCC16C4.11   | SPCC576.03c   | 0.3532888 | Novel | NO  | YES | NO  | NO |
| SPBC800.05c   | SPAC16C9.07   | 0.3532493 | Novel | NO  | NO  | NO  | NO |
| SPACUNK4.06c  | SPBC651.08c   | 0.3532241 | Novel | NO  | YES | NO  | NO |
| SPAC6B12.15   | SPBC13G1.08c  | 0.3531689 | Novel | NO  | NO  | NO  | NO |
| SPBC337.14    | SPBC651.08c   | 0.3531622 | Novel | NO  | YES | NO  | NO |
| SPBP8B7.06    | SPAC23H3.04   | 0.3530589 | Novel | NO  | NO  | NO  | NO |
| SPAC110.03    | SPBC56F2.07c  | 0.3530255 | Novel | NO  | NO  | NO  | NO |
| SPAC6B12.15   | SPCC306.04c   | 0.3529939 | Novel | YES | NO  | NO  | NO |
| SPAC23A1.06c  | SPBC32H8.10   | 0.3529666 | Novel | NO  | YES | YES | NO |
| SPCC16C4.01   | SPBC12D12.01  | 0.3529566 | Novel | YES | NO  | NO  | NO |
| SPAC664.10    | SPAC1786.03   | 0.3529528 | Novel | NO  | NO  | NO  | NO |
| SPAPYUG7.04c  | SPBC651.08c   | 0.3529443 | Novel | NO  | YES | NO  | NO |
| SPAC3A12.07   | SPBC651.08c   | 0.352904  | Novel | NO  | YES | NO  | NO |
| SPAC16.01     | SPBC19C2.05   | 0.3528684 | Novel | NO  | YES | NO  | NO |
| SPBC14C8.12   | SPBC651.08c   | 0.3528615 | Novel | YES | YES | YES | NO |
| SPBC1734.14c  | SPAC23H4.17c  | 0.3528529 | Novel | NO  | NO  | NO  | NO |
| SPBC26H8.07c  | SPAC16C9.07   | 0.3528316 | Novel | NO  | NO  | NO  | NO |
| SPAC23H3.04   | SPAC637.12c   | 0.3528237 | Novel | NO  | NO  | NO  | NO |
| SPBC11B10.09  | SPAC1F5.10    | 0.3527962 | Novel | NO  | YES | NO  | NO |
| SPBC106.10    | SPBC17F3.02   | 0.3527233 | Novel | YES | YES | YES | NO |
| SPAC23H3.04   | SPBC23G7.14   | 0.3526653 | Novel | NO  | NO  | YES | NO |
| SPAC23H3.04   | SPAC1486.04c  | 0.3525691 | Novel | NO  | NO  | NO  | NO |
| SPAC1D4.13    | SPBC8D2.01    | 0.3524638 | Novel | NO  | YES | YES | NO |
| SPBC18H10.15  | SPBC16H5.07c  | 0.352369  | Novel | NO  | NO  | YES | NO |
| SPBC2D10.20   | SPCC338.05c   | 0.3523569 | Novel | NO  | YES | YES | NO |
| SPAC3G6.02    | SPAC1006.07   | 0.3523407 | Novel | NO  | NO  | NO  | NO |
| SPCC16A11.05c | SPAC23H4.17c  | 0.3523279 | Novel | NO  | NO  | NO  | NO |

|               |               |           |       |     |     |     |     |
|---------------|---------------|-----------|-------|-----|-----|-----|-----|
| SPAC23H3.04   | SPBC1861.09   | 0.3523154 | Novel | NO  | NO  | NO  | NO  |
| SPAC17D4.02   | SPACUNK12.02c | 0.3522321 | Novel | NO  | NO  | NO  | NO  |
| SPBC409.07c   | SPAC2F3.15    | 0.3522196 | Novel | NO  | YES | NO  | NO  |
| SPAC1B9.02c   | SPAC9G1.09    | 0.3521653 | Novel | NO  | YES | YES | NO  |
| SPAC23H3.04   | SPCC18.05c    | 0.3520658 | Novel | NO  | NO  | NO  | NO  |
| SPAC57A7.08   | SPBC543.07    | 0.352049  | Novel | YES | NO  | YES | YES |
| SPCC1259.13   | SPBC17D1.06   | 0.3520062 | Novel | NO  | YES | NO  | NO  |
| SPBC651.08c   | SPAC1B3.12c   | 0.3519814 | Novel | YES | YES | YES | NO  |
| SPCC16C4.11   | SPBC244.01c   | 0.3519594 | Novel | NO  | YES | NO  | NO  |
| SPAC4A8.05c   | SPAC20G4.06c  | 0.3519246 | Novel | NO  | YES | NO  | YES |
| SPAC3A11.12c  | SPCC5E4.04    | 0.3518736 | Novel | NO  | NO  | NO  | NO  |
| SPBC1703.10   | SPAC1B3.11c   | 0.3518706 | Novel | NO  | YES | YES | NO  |
| SPCC16C4.11   | SPCC4B3.15    | 0.3517942 | Novel | NO  | YES | NO  | NO  |
| SPBC216.07c   | SPCC4G3.08    | 0.3517917 | Novel | NO  | YES | YES | NO  |
| SPBC19C2.03   | SPBC651.08c   | 0.3516332 | Novel | YES | YES | YES | NO  |
| SPBC13G1.11   | SPAC1B3.11c   | 0.3515809 | Novel | NO  | NO  | YES | NO  |
| SPCC576.15c   | SPCC162.10    | 0.3515731 | Novel | NO  | YES | YES | NO  |
| SPCC1840.02c  | SPBC19F8.07   | 0.3515502 | Novel | YES | NO  | NO  | NO  |
| SPBC1604.14c  | SPAC1687.15   | 0.3514961 | Novel | NO  | YES | YES | NO  |
| SPAC11H11.06  | SPCC1672.06c  | 0.3514289 | Novel | NO  | YES | NO  | YES |
| SPAC23H3.04   | SPAC23D3.10c  | 0.3514046 | Novel | YES | NO  | NO  | NO  |
| SPBC354.03    | SPBC29B5.01   | 0.3513954 | Novel | YES | NO  | NO  | NO  |
| SPAC24B11.11c | SPBC16H5.11c  | 0.3513644 | Novel | NO  | YES | NO  | NO  |
| SPCC576.03c   | SPBC19F8.07   | 0.351211  | Novel | YES | NO  | NO  | NO  |
| SPAC23H3.04   | SPCC1450.09c  | 0.3511911 | Novel | YES | NO  | NO  | NO  |
| SPAC1D4.06c   | SPAC1687.15   | 0.351121  | Novel | NO  | YES | YES | NO  |
| SPBC336.04    | SPAC31G5.09c  | 0.3510066 | Novel | NO  | NO  | NO  | NO  |
| SPCC4G3.08    | SPBC14C8.01c  | 0.3510043 | Novel | NO  | NO  | NO  | NO  |
| SPBC9B6.10    | SPAC1687.15   | 0.3509326 | Novel | NO  | NO  | NO  | NO  |
| SPBC11B10.09  | SPBC4F6.06    | 0.3509216 | Novel | NO  | YES | YES | NO  |
| SPAC24B11.11c | SPAC4A8.05c   | 0.3508997 | Novel | NO  | YES | NO  | YES |
| SPCC16C4.09   | SPAC57A7.08   | 0.3507833 | Novel | YES | NO  | NO  | NO  |
| SPBC405.04c   | SPAC9E9.07c   | 0.3507693 | Novel | NO  | YES | YES | NO  |
| SPAC24B11.11c | SPBP19A11.04c | 0.3506276 | Novel | NO  | YES | NO  | NO  |
| SPBC1718.01   | SPBC14C8.07c  | 0.3506168 | Novel | NO  | NO  | NO  | YES |
| SPBC582.03    | SPAC2F3.15    | 0.3506069 | Novel | NO  | NO  | NO  | NO  |
| SPAC2F3.15    | SPAC19E9.02   | 0.3505435 | Novel | NO  | YES | NO  | NO  |
| SPCC1259.13   | SPAC1F5.10    | 0.3504458 | Novel | NO  | YES | NO  | NO  |
| SPACUNK12.02c | SPAC23C11.16  | 0.3504223 | Novel | NO  | YES | YES | NO  |
| SPAC1805.05   | SPBP35G2.05c  | 0.3504064 | Novel | NO  | YES | YES | NO  |
| SPBC11B10.09  | SPAC630.14c   | 0.3503737 | Novel | NO  | YES | NO  | NO  |
| SPCC622.09    | SPCC320.13c   | 0.350356  | Novel | NO  | NO  | NO  | NO  |
| SPCC24B10.07  | SPCC320.13c   | 0.350303  | Novel | NO  | YES | NO  | NO  |
| SPAC31G5.09c  | SPBC16H5.11c  | 0.3502792 | Novel | NO  | NO  | NO  | NO  |
| SPBC713.06    | SPAC9E9.08    | 0.3502343 | Novel | NO  | NO  | NO  | NO  |
| SPBC409.07c   | SPBC106.10    | 0.3502136 | Novel | YES | YES | YES | YES |
| SPAC23H3.04   | SPAC17A5.18c  | 0.3500513 | Novel | NO  | NO  | NO  | NO  |

|               |               |           |       |     |     |     |     |
|---------------|---------------|-----------|-------|-----|-----|-----|-----|
| SPBC660.14    | SPCC1259.13   | 0.3500041 | Novel | NO  | YES | YES | YES |
| SPAC24B11.06c | SPBC1861.09   | 0.3498954 | Novel | NO  | YES | YES | NO  |
| SPAC9G1.09    | SPCC1322.08   | 0.3498849 | Novel | NO  | YES | YES | NO  |
| SPBC354.03    | SPAC21E11.03c | 0.3498323 | Novel | YES | NO  | NO  | NO  |
| SPAC24B11.11c | SPBC646.06c   | 0.3497445 | Novel | NO  | NO  | NO  | NO  |
| SPAC24B11.06c | SPBC8D2.19    | 0.3496801 | Novel | NO  | YES | YES | NO  |
| SPCC16C4.11   | SPAC977.10    | 0.3495666 | Novel | NO  | NO  | NO  | NO  |
| SPAC6B12.15   | SPCC594.05c   | 0.3495208 | Novel | NO  | NO  | NO  | NO  |
| SPBC543.07    | SPAC23C11.16  | 0.3495202 | Novel | YES | YES | YES | NO  |
| SPAC17G6.16c  | SPBC18H10.06c | 0.3494338 | Novel | NO  | NO  | NO  | NO  |
| SPAC31G5.09c  | SPAC22F3.09c  | 0.3493122 | Novel | NO  | NO  | NO  | NO  |
| SPCC576.15c   | SPAC4G8.05    | 0.3492986 | Novel | NO  | YES | YES | NO  |
| SPBC11G11.04  | SPAC23H3.04   | 0.3492792 | Novel | NO  | NO  | NO  | NO  |
| SPBC56F2.07c  | SPAC23H3.04   | 0.3492575 | Novel | NO  | NO  | NO  | NO  |
| SPAC977.10    | SPBC19F8.07   | 0.3492219 | Novel | NO  | NO  | NO  | NO  |
| SPAC23H3.04   | SPBC1A4.11c   | 0.3491969 | Novel | NO  | NO  | YES | NO  |
| SPAC23H3.04   | SPAC26F1.02   | 0.349086  | Novel | NO  | NO  | YES | NO  |
| SPAC22E12.14c | SPBC11B10.09  | 0.3490758 | Novel | NO  | YES | YES | NO  |
| SPAC6B12.15   | SPAC17G8.09   | 0.3490281 | Novel | NO  | NO  | NO  | NO  |
| SPBC713.06    | SPBC342.05    | 0.3489761 | Novel | NO  | NO  | NO  | NO  |
| SPAC4F10.15c  | SPAC15A10.16  | 0.3489059 | Novel | NO  | YES | YES | NO  |
| SPAC31G5.09c  | SPBC14C8.07c  | 0.3488684 | Novel | NO  | YES | NO  | NO  |
| SPBC887.04c   | SPAC2G11.06   | 0.3488113 | Novel | YES | NO  | NO  | NO  |
| SPAC9G1.02    | SPAC2C4.14c   | 0.3487748 | Novel | NO  | YES | YES | NO  |
| SPBC11B10.09  | SPCC4G3.08    | 0.3485758 | Novel | NO  | YES | YES | NO  |
| SPACUNK12.02c | SPBC4.04c     | 0.3485422 | Novel | NO  | YES | NO  | NO  |
| SPAC31G5.09c  | SPBC336.12c   | 0.3485366 | Novel | NO  | NO  | NO  | NO  |
| SPAC110.03    | SPBC11B10.09  | 0.3484842 | Novel | NO  | YES | NO  | YES |
| SPAC23H3.04   | SPAC23H4.02   | 0.34841   | Novel | NO  | NO  | NO  | NO  |
| SPAC23H3.04   | SPAC823.04    | 0.348407  | Novel | NO  | NO  | NO  | NO  |
| SPCC320.13c   | SPAC2C4.14c   | 0.348387  | Novel | NO  | YES | NO  | NO  |
| SPAC23H3.04   | SPCC794.01c   | 0.34837   | Novel | NO  | NO  | NO  | NO  |
| SPBC16A3.05c  | SPAC23A1.09   | 0.3483189 | Novel | NO  | NO  | NO  | NO  |
| SPCC16C4.11   | SPCC757.09c   | 0.3481869 | Novel | NO  | YES | NO  | NO  |
| SPAC24B11.06c | SPBC776.18c   | 0.3481707 | Novel | NO  | YES | NO  | NO  |
| SPACUNK12.02c | SPAC23C4.18c  | 0.3481466 | Novel | NO  | NO  | NO  | NO  |
| SPAC6B12.15   | SPCC320.13c   | 0.3480428 | Novel | NO  | YES | NO  | NO  |
| SPAC23H3.04   | SPBC3B9.22c   | 0.3480146 | Novel | NO  | NO  | NO  | NO  |
| SPBC4.04c     | SPBC29A10.15  | 0.347882  | Novel | YES | YES | YES | YES |
| SPBC354.03    | SPAC8C9.03    | 0.3476842 | Novel | NO  | NO  | NO  | NO  |
| SPAC29A4.16   | SPAC1687.15   | 0.3476808 | Novel | NO  | YES | YES | NO  |
| SPBC582.03    | SPCC18.05c    | 0.3476741 | Novel | NO  | NO  | NO  | NO  |
| SPBC713.06    | SPAC1952.07   | 0.3476734 | Novel | NO  | NO  | YES | NO  |
| SPCC16C4.11   | SPAC1006.09   | 0.3476401 | Novel | NO  | YES | YES | NO  |
| SPBC354.03    | SPAC6F12.15c  | 0.3476327 | Novel | NO  | NO  | NO  | NO  |
| SPBC409.07c   | SPAC821.12    | 0.3475351 | Novel | NO  | YES | YES | NO  |
| SPAC821.06    | SPCC417.06c   | 0.3474889 | Novel | NO  | NO  | NO  | NO  |



|               |               |           |       |     |     |     |     |
|---------------|---------------|-----------|-------|-----|-----|-----|-----|
| SPCC757.09c   | SPAC1D4.13    | 0.3474055 | Novel | NO  | YES | YES | NO  |
| SPAC23H3.04   | SPAC1142.07c  | 0.3473568 | Novel | NO  | NO  | NO  | NO  |
| SPBC1198.09   | SPCC338.05c   | 0.3473404 | Novel | NO  | YES | YES | NO  |
| SPBC25D12.03c | SPCC364.02c   | 0.3472538 | Novel | NO  | NO  | NO  | YES |
| SPBC660.14    | SPCC320.13c   | 0.3472187 | Novel | NO  | YES | NO  | NO  |
| SPAC23A1.06c  | SPCC18B5.11c  | 0.3471632 | Novel | NO  | YES | YES | YES |
| SPCC162.06c   | SPAC23H3.04   | 0.3470814 | Novel | NO  | NO  | NO  | NO  |
| SPBC354.03    | SPBC3B8.02    | 0.3470508 | Novel | NO  | NO  | NO  | NO  |
| SPBC20F10.06  | SPAC2C4.14c   | 0.347047  | Novel | NO  | NO  | NO  | NO  |
| SPAC22E12.14c | SPBC216.07c   | 0.347042  | Novel | NO  | YES | NO  | NO  |
| SPAC24H6.05   | SPCC74.03c    | 0.3469441 | Novel | YES | NO  | NO  | YES |
| SPCC4E9.02    | SPBC1347.12   | 0.3469416 | Novel | NO  | NO  | NO  | NO  |
| SPAC22G7.09c  | SPCC613.12c   | 0.3469285 | Novel | NO  | NO  | NO  | NO  |
| SPAC2G11.11c  | SPAPB2B4.03   | 0.3468768 | Novel | NO  | NO  | NO  | NO  |
| SPAC23H3.04   | SPAC25H1.08c  | 0.3468735 | Novel | NO  | NO  | NO  | NO  |
| SPBC1D7.04    | SPAC1006.07   | 0.3467977 | Novel | NO  | NO  | NO  | NO  |
| SPAC23H3.04   | SPCC10H11.02  | 0.3467662 | Novel | NO  | NO  | NO  | NO  |
| SPAC16A10.04  | SPBC12D12.07c | 0.3467604 | Novel | NO  | NO  | NO  | NO  |
| SPBC8D2.01    | SPCC1739.11c  | 0.3467497 | Novel | YES | NO  | NO  | NO  |
| SPAC343.09    | SPAC2G11.06   | 0.3466928 | Novel | NO  | NO  | NO  | NO  |
| SPAC3A11.09   | SPAC23H3.04   | 0.3466478 | Novel | YES | NO  | NO  | NO  |
| SPBC30B4.01c  | SPAC14C4.09   | 0.3465902 | Novel | NO  | NO  | NO  | NO  |
| SPAC24B11.06c | SPBC19C2.05   | 0.3465363 | Novel | YES | YES | YES | YES |
| SPCC18B5.03   | SPAC11E3.09   | 0.3465314 | Novel | NO  | NO  | NO  | YES |
| SPBC1685.01   | SPAC1D4.13    | 0.3464319 | Novel | NO  | YES | YES | NO  |
| SPAC2G11.06   | SPAC2C4.15c   | 0.346425  | Novel | YES | NO  | NO  | NO  |
| SPAC24B11.11c | SPAC31G5.09c  | 0.3463992 | Novel | NO  | YES | YES | NO  |
| SPBC354.03    | SPAC644.04    | 0.3463189 | Novel | NO  | NO  | NO  | NO  |
| SPAC31G5.09c  | SPAC821.08c   | 0.3463158 | Novel | NO  | NO  | NO  | NO  |
| SPAC2G11.06   | SPBC14C8.01c  | 0.3462985 | Novel | NO  | NO  | NO  | NO  |
| SPBC29A10.15  | SPCC1682.02c  | 0.3462057 | Novel | YES | YES | YES | YES |
| SPCC16C4.11   | SPAC4F10.15c  | 0.3461067 | Novel | NO  | YES | NO  | NO  |
| SPBC4C3.05c   | SPAC30D11.10  | 0.3460333 | Novel | NO  | NO  | NO  | YES |
| SPCC162.10    | SPBP4H10.04   | 0.3459285 | Novel | NO  | NO  | YES | NO  |
| SPBC11B10.09  | SPCC74.03c    | 0.3459243 | Novel | NO  | YES | YES | NO  |
| SPCC16C4.11   | SPAC17A5.11   | 0.3458732 | Novel | NO  | YES | NO  | NO  |
| SPAC23H3.04   | SPBC13G1.10c  | 0.3458574 | Novel | NO  | NO  | NO  | NO  |
| SPAC4A8.05c   | SPBC21.06c    | 0.3458084 | Novel | NO  | YES | NO  | YES |
| SPAC31G5.09c  | SPAC1B9.02c   | 0.3457932 | Novel | NO  | YES | YES | NO  |
| SPBC713.06    | SPBC16D10.09  | 0.3457833 | Novel | NO  | YES | NO  | NO  |
| SPBC32F12.09  | SPCC1682.02c  | 0.3457677 | Novel | NO  | NO  | NO  | YES |
| SPAC4A8.05c   | SPAC926.04c   | 0.3456745 | Novel | YES | YES | NO  | YES |
| SPAC4F10.15c  | SPBC1706.01   | 0.3456517 | Novel | NO  | YES | YES | NO  |
| SPCC613.12c   | SPAC26A3.15c  | 0.3455124 | Novel | NO  | NO  | NO  | NO  |
| SPAC22G7.09c  | SPAC1952.13   | 0.3455043 | Novel | YES | NO  | YES | NO  |
| SPBC713.06    | SPAC343.11c   | 0.345486  | Novel | NO  | NO  | NO  | NO  |
| SPCC1682.16   | SPAC23C4.08   | 0.3454848 | Novel | NO  | NO  | NO  | NO  |

|               |               |           |       |     |     |     |     |
|---------------|---------------|-----------|-------|-----|-----|-----|-----|
| SPAC57A7.08   | SPCC188.02    | 0.3454784 | Novel | NO  | NO  | NO  | NO  |
| SPBC1709.01   | SPAC29A4.05   | 0.3453782 | Novel | NO  | YES | NO  | YES |
| SPCC16C4.11   | SPCC576.15c   | 0.3453162 | Novel | NO  | YES | YES | NO  |
| SPBC543.07    | SPBC21.06c    | 0.3452864 | Novel | NO  | YES | YES | YES |
| SPBC713.06    | SPBC16D10.04c | 0.3451364 | Novel | NO  | YES | YES | NO  |
| SPAC27D7.02c  | SPAC23H3.04   | 0.3451212 | Novel | NO  | NO  | NO  | NO  |
| SPAC637.07    | SPBC32F12.04  | 0.3449119 | Novel | NO  | NO  | NO  | YES |
| SPCC24B10.07  | SPBC19F8.07   | 0.3447756 | Novel | NO  | YES | YES | NO  |
| SPBC16A3.15c  | SPAC823.03    | 0.3447582 | Novel | NO  | NO  | NO  | NO  |
| SPAC24H6.05   | SPAC1F5.10    | 0.3447256 | Novel | NO  | NO  | NO  | NO  |
| SPAC6F12.15c  | SPCC18.05c    | 0.3445077 | Novel | NO  | NO  | NO  | NO  |
| SPAC23H3.04   | SPBC1604.25   | 0.3444949 | Novel | NO  | NO  | NO  | NO  |
| SPAC16A10.04  | SPCC1682.16   | 0.3444827 | Novel | NO  | NO  | NO  | NO  |
| SPAC1B3.03c   | SPCC188.11    | 0.3444674 | Novel | NO  | NO  | NO  | NO  |
| SPAC24B11.06c | SPBC409.04c   | 0.3443308 | Novel | YES | YES | NO  | NO  |
| SPAC23H4.02   | SPAC821.08c   | 0.3443268 | Novel | NO  | NO  | NO  | NO  |
| SPAC1952.13   | SPAC26A3.15c  | 0.3443088 | Novel | NO  | NO  | YES | NO  |
| SPBC25D12.03c | SPCC895.07    | 0.3440869 | Novel | NO  | NO  | NO  | YES |
| SPCC970.12    | SPAC25H1.06   | 0.3439438 | Novel | YES | NO  | NO  | NO  |
| SPAC821.12    | SPACUNK12.02c | 0.3438537 | Novel | NO  | YES | YES | NO  |
| SPBC1105.17   | SPAC25H1.06   | 0.3435567 | Novel | NO  | NO  | NO  | NO  |
| SPAC23H3.04   | SPCC24B10.03  | 0.3435301 | Novel | NO  | NO  | YES | NO  |
| SPAC4F10.15c  | SPBC28E12.03  | 0.3434916 | Novel | NO  | YES | NO  | NO  |
| SPCC417.06c   | SPBC1604.14c  | 0.3434059 | Novel | NO  | YES | YES | NO  |
| SPAC110.03    | SPAC1565.08   | 0.3432771 | Novel | NO  | YES | NO  | NO  |
| SPAC57A7.08   | SPBC12D12.04c | 0.3432495 | Novel | NO  | NO  | NO  | YES |
| SPAC1D4.13    | SPCC18B5.11c  | 0.3431948 | Novel | NO  | YES | YES | NO  |
| SPAC23H3.04   | SPBC14C8.08c  | 0.3431005 | Novel | NO  | NO  | NO  | NO  |
| SPAC31G5.09c  | SPBC19G7.05c  | 0.3430959 | Novel | NO  | NO  | NO  | NO  |
| SPAC56F8.16   | SPCC320.13c   | 0.3430853 | Novel | NO  | NO  | NO  | NO  |
| SPAC22E12.14c | SPAC1F3.02c   | 0.3430307 | Novel | NO  | YES | YES | NO  |
| SPBC20F10.01  | SPAC12G12.13c | 0.3429517 | Novel | YES | YES | NO  | NO  |
| SPAC31G5.09c  | SPACUNK12.02c | 0.3428569 | Novel | NO  | YES | YES | NO  |
| SPBC1703.10   | SPAC1F5.09c   | 0.342849  | Novel | NO  | NO  | NO  | NO  |
| SPBC543.07    | SPCC4G3.08    | 0.3427305 | Novel | NO  | YES | YES | NO  |
| SPBC582.03    | SPCC320.13c   | 0.3426412 | Novel | NO  | YES | NO  | NO  |
| SPAC20H4.11c  | SPAC9E9.07c   | 0.342633  | Novel | NO  | YES | YES | NO  |
| SPAC22E12.14c | SPAC31G5.09c  | 0.3426045 | Novel | NO  | YES | YES | NO  |
| SPBC18H10.15  | SPAC17G8.14c  | 0.3425586 | Novel | NO  | YES | YES | NO  |
| SPAC6G9.06c   | SPAC926.03    | 0.3423401 | Novel | NO  | YES | NO  | NO  |
| SPBC106.10    | SPBC30D10.10c | 0.3422956 | Novel | YES | YES | YES | NO  |
| SPBP16F5.02   | SPAC2F3.15    | 0.3421476 | Novel | NO  | NO  | NO  | NO  |
| SPAC821.12    | SPBC1861.09   | 0.342117  | Novel | NO  | YES | YES | NO  |
| SPCC1259.13   | SPBC8D2.01    | 0.3420492 | Novel | YES | YES | YES | NO  |
| SPAC21E11.03c | SPBC1289.11   | 0.3419618 | Novel | NO  | NO  | NO  | NO  |
| SPBC409.07c   | SPCC18B5.11c  | 0.3419161 | Novel | NO  | YES | YES | YES |
| SPAC31G5.09c  | SPAC23H4.17c  | 0.3418745 | Novel | NO  | YES | YES | NO  |

|               |               |           |       |     |     |     |     |
|---------------|---------------|-----------|-------|-----|-----|-----|-----|
| SPAC17H9.09c  | SPCC895.07    | 0.3418354 | Novel | NO  | NO  | YES | NO  |
| SPAC31G5.09c  | SPAC21E11.03c | 0.3417884 | Novel | NO  | NO  | NO  | NO  |
| SPAC24H6.05   | SPBC17D1.06   | 0.3417653 | Novel | NO  | NO  | NO  | NO  |
| SPBC16A3.15c  | SPAC16C9.07   | 0.3417291 | Novel | NO  | NO  | NO  | NO  |
| SPAC23H3.04   | SPAC3C7.13c   | 0.3417121 | Novel | NO  | NO  | NO  | NO  |
| SPCC4E9.02    | SPAC11H11.06  | 0.3416102 | Novel | NO  | NO  | NO  | NO  |
| SPBC3B9.11c   | SPBC18H10.06c | 0.3416022 | Novel | NO  | NO  | NO  | NO  |
| SPAC23H3.04   | SPCC417.08    | 0.3415994 | Novel | NO  | NO  | NO  | NO  |
| SPAC1F7.04    | SPAC9E9.07c   | 0.3415753 | Novel | NO  | YES | NO  | NO  |
| SPBC18H10.15  | SPAC3C7.06c   | 0.3414482 | Novel | NO  | YES | YES | NO  |
| SPCC736.14    | SPBC25D12.03c | 0.3414164 | Novel | NO  | NO  | NO  | YES |
| SPAC4F10.15c  | SPAC20H4.11c  | 0.3413967 | Novel | YES | NO  | YES | NO  |
| SPAC23H3.04   | SPBC15D4.08c  | 0.341327  | Novel | NO  | NO  | NO  | NO  |
| SPBC409.07c   | SPCC18.05c    | 0.3412157 | Novel | NO  | NO  | NO  | NO  |
| SPAPB17E12.09 | SPAC23H3.04   | 0.3411746 | Novel | NO  | NO  | NO  | NO  |
| SPCC18B5.03   | SPBC31F10.13c | 0.341174  | Novel | NO  | YES | NO  | YES |
| SPBC11B10.09  | SPBP16F5.05c  | 0.3410185 | Novel | NO  | NO  | NO  | NO  |
| SPAC17H9.09c  | SPAC1F3.02c   | 0.3410119 | Novel | NO  | NO  | YES | YES |
| SPCC1672.06c  | SPBC1347.12   | 0.3409638 | Novel | NO  | NO  | NO  | NO  |
| SPBC32H8.12c  | SPAC1805.07c  | 0.3408989 | Novel | NO  | NO  | NO  | NO  |
| SPCC4E9.02    | SPAC24C9.07c  | 0.3408727 | Novel | NO  | NO  | NO  | NO  |
| SPAC4A8.05c   | SPBC244.01c   | 0.3408643 | Novel | NO  | YES | YES | YES |
| SPBC12D12.04c | SPBC18H10.15  | 0.3408616 | Novel | NO  | YES | YES | NO  |
| SPCC320.13c   | SPAC1F5.09c   | 0.3408574 | Novel | NO  | YES | NO  | NO  |
| SPAC57A10.02  | SPCC1259.13   | 0.340743  | Novel | NO  | YES | YES | YES |
| SPAC22H10.04  | SPBC3F6.01c   | 0.3404384 | Novel | YES | YES | YES | NO  |
| SPBC1D7.05    | SPAC23C4.08   | 0.3402722 | Novel | NO  | YES | NO  | NO  |
| SPCC16C4.11   | SPAC22E12.14c | 0.3401457 | Novel | NO  | YES | YES | NO  |
| SPCC18B5.03   | SPCC74.03c    | 0.3400962 | Novel | NO  | YES | NO  | NO  |
| SPAC24B11.06c | SPBC776.12c   | 0.340046  | Novel | NO  | YES | YES | YES |
| SPBC9B6.10    | SPBC8D2.01    | 0.3399397 | Novel | YES | NO  | NO  | NO  |
| SPAC20G4.06c  | SPAC2C4.14c   | 0.3397061 | Novel | YES | NO  | NO  | NO  |
| SPACUNK12.02c | SPBC409.05    | 0.3396773 | Novel | NO  | NO  | NO  | NO  |
| SPBP4H10.04   | SPAC4A8.12c   | 0.3395853 | Novel | NO  | NO  | NO  | YES |
| SPBC11B10.09  | SPAC1006.07   | 0.3395664 | Novel | NO  | YES | NO  | NO  |
| SPBC119.08    | SPAC644.06c   | 0.339544  | Novel | YES | YES | YES | NO  |
| SPBP4H10.04   | SPBC106.10    | 0.3394923 | Novel | NO  | NO  | NO  | NO  |
| SPAC24B11.11c | SPAC24H6.09   | 0.339434  | Novel | YES | YES | NO  | NO  |
| SPBC428.13c   | SPCC24B10.07  | 0.3394193 | Novel | NO  | YES | NO  | NO  |
| SPBC119.08    | SPAC23H4.17c  | 0.3394139 | Novel | NO  | YES | YES | NO  |
| SPCC162.10    | SPAC1F7.04    | 0.3393974 | Novel | NO  | NO  | NO  | NO  |
| SPBC216.06c   | SPACUNK12.02c | 0.3393821 | Novel | NO  | NO  | NO  | NO  |
| SPAC1805.05   | SPBC1347.06c  | 0.3393498 | Novel | NO  | YES | YES | NO  |
| SPBC119.08    | SPAC2F3.15    | 0.3393322 | Novel | NO  | YES | NO  | NO  |
| SPBC543.07    | SPAC1565.04c  | 0.3393094 | Novel | YES | NO  | NO  | NO  |
| SPAC23H3.04   | SPCC645.12c   | 0.3390478 | Novel | NO  | NO  | YES | NO  |
| SPBC3D6.08c   | SPAC644.12    | 0.3389774 | Novel | NO  | NO  | NO  | NO  |

|               |               |           |       |     |     |     |     |
|---------------|---------------|-----------|-------|-----|-----|-----|-----|
| SPCC1259.15c  | SPAC20H4.11c  | 0.338952  | Novel | NO  | NO  | NO  | NO  |
| SPCC4B3.15    | SPCC320.13c   | 0.3389389 | Novel | NO  | YES | YES | YES |
| SPAC31G5.09c  | SPBC776.18c   | 0.3389296 | Novel | NO  | NO  | NO  | NO  |
| SPAC31G5.09c  | SPCC1795.11   | 0.3389103 | Novel | NO  | YES | NO  | NO  |
| SPBC11B10.09  | SPAPB18E9.04c | 0.338848  | Novel | NO  | NO  | NO  | NO  |
| SPAC57A7.08   | SPAC17G8.14c  | 0.3387971 | Novel | NO  | NO  | YES | YES |
| SPAC823.15    | SPCC320.13c   | 0.3387623 | Novel | NO  | NO  | NO  | NO  |
| SPBC19C7.03   | SPACUNK12.02c | 0.338757  | Novel | NO  | YES | NO  | NO  |
| SPCC18B5.11c  | SPAC1F5.09c   | 0.338692  | Novel | NO  | YES | YES | NO  |
| SPBC4F6.12    | SPAC29A4.05   | 0.3386712 | Novel | YES | YES | NO  | YES |
| SPAC31G5.09c  | SPAC6B12.11   | 0.3386427 | Novel | NO  | NO  | NO  | NO  |
| SPCC1259.13   | SPAC22F3.03c  | 0.3385506 | Novel | NO  | YES | NO  | NO  |
| SPBC11B10.09  | SPAC23C4.08   | 0.3384969 | Novel | NO  | YES | NO  | NO  |
| SPAC22E12.14c | SPCC18B5.11c  | 0.3383386 | Novel | NO  | YES | YES | NO  |
| SPBC12D12.08c | SPAC26A3.16   | 0.3382747 | Novel | NO  | NO  | NO  | NO  |
| SPACUNK12.02c | SPBC19F8.07   | 0.3382671 | Novel | NO  | YES | YES | NO  |
| SPBC1198.12   | SPBC18H10.15  | 0.3380984 | Novel | NO  | NO  | NO  | NO  |
| SPAC23H3.04   | SPAC222.18    | 0.3380597 | Novel | NO  | NO  | NO  | NO  |
| SPBC32H8.10   | SPBC24C6.07   | 0.3378872 | Novel | NO  | YES | NO  | NO  |
| SPCC74.09     | SPAC6B12.15   | 0.3378727 | Novel | NO  | NO  | NO  | NO  |
| SPAC9G1.09    | SPCC4G3.08    | 0.337721  | Novel | NO  | YES | YES | NO  |
| SPCC569.03    | SPAC23H3.04   | 0.3375985 | Novel | NO  | NO  | YES | NO  |
| SPBC19F8.01c  | SPAC23H3.04   | 0.3375981 | Novel | NO  | NO  | YES | NO  |
| SPBC106.10    | SPAC4G8.05    | 0.3375558 | Novel | NO  | YES | YES | NO  |
| SPAC2F3.15    | SPBC4C3.12    | 0.3375246 | Novel | NO  | NO  | NO  | NO  |
| SPAC9G1.09    | SPACUNK12.02c | 0.3375084 | Novel | NO  | YES | YES | NO  |
| SPBP4H10.04   | SPCC4G3.08    | 0.337469  | Novel | NO  | NO  | YES | NO  |
| SPAC31G5.09c  | SPBC146.03c   | 0.3374231 | Novel | NO  | YES | NO  | NO  |
| SPBC32F12.04  | SPAC18G6.02c  | 0.3374033 | Novel | NO  | NO  | NO  | YES |
| SPCC16C4.11   | SPAPB18E9.04c | 0.3373618 | Novel | NO  | NO  | NO  | NO  |
| SPCC5E4.03c   | SPCC777.10c   | 0.3372597 | Novel | NO  | NO  | NO  | NO  |
| SPCC18B5.11c  | SPAC17G8.14c  | 0.3371735 | Novel | YES | YES | YES | NO  |
| SPAC1F3.02c   | SPCC4G3.08    | 0.3370037 | Novel | NO  | YES | YES | NO  |
| SPAC31G5.09c  | SPBC685.09    | 0.3369513 | Novel | NO  | NO  | NO  | NO  |
| SPBC32H8.10   | SPAC1782.09c  | 0.336876  | Novel | NO  | YES | NO  | NO  |
| SPBC21C3.20c  | SPCC320.13c   | 0.3367674 | Novel | NO  | NO  | NO  | NO  |
| SPBC776.12c   | SPAC2C4.14c   | 0.336723  | Novel | NO  | YES | YES | NO  |
| SPAC31G5.09c  | SPAC821.04c   | 0.3366899 | Novel | NO  | YES | NO  | NO  |
| SPCC162.10    | SPCC1739.11c  | 0.336682  | Novel | NO  | NO  | NO  | NO  |
| SPCC1682.16   | SPBC14C8.01c  | 0.3366392 | Novel | NO  | NO  | NO  | NO  |
| SPAC23H3.04   | SPCC16A11.02  | 0.3366361 | Novel | NO  | NO  | NO  | NO  |
| SPCC18B5.11c  | SPCC1322.08   | 0.3366033 | Novel | NO  | YES | YES | YES |
| SPAC4A8.05c   | SPAC1565.06c  | 0.3365835 | Novel | NO  | YES | YES | YES |
| SPAC23H3.04   | SPAC22G7.09c  | 0.3365561 | Novel | NO  | NO  | NO  | NO  |
| SPAC1F5.10    | SPBC14C8.07c  | 0.3365496 | Novel | NO  | YES | NO  | NO  |
| SPAC821.12    | SPBC14C8.01c  | 0.3364224 | Novel | NO  | NO  | NO  | NO  |
| SPCC338.05c   | SPCC777.10c   | 0.3363924 | Novel | NO  | NO  | NO  | NO  |

|               |              |           |       |     |     |     |     |
|---------------|--------------|-----------|-------|-----|-----|-----|-----|
| SPAC3A11.14c  | SPBC16A3.15c | 0.3363209 | Novel | NO  | NO  | YES | YES |
| SPAC664.07c   | SPCC320.13c  | 0.3362949 | Novel | NO  | YES | NO  | NO  |
| SPAC1B2.05    | SPBC14C8.07c | 0.3362069 | Novel | YES | YES | YES | YES |
| SPCC24B10.07  | SPCC5E4.04   | 0.3362018 | Novel | NO  | YES | NO  | NO  |
| SPBC21.06c    | SPAC1F5.09c  | 0.3361996 | Novel | NO  | YES | YES | NO  |
| SPAC890.07c   | SPAC23H3.04  | 0.3361417 | Novel | NO  | NO  | NO  | NO  |
| SPCC4G3.08    | SPAC23C4.08  | 0.3361053 | Novel | NO  | NO  | NO  | NO  |
| SPBP4H10.04   | SPBC26H8.10  | 0.3360331 | Novel | NO  | NO  | NO  | YES |
| SPBC11B10.09  | SPAC1006.09  | 0.3359489 | Novel | NO  | YES | YES | YES |
| SPAC110.03    | SPCC162.10   | 0.33584   | Novel | NO  | NO  | NO  | NO  |
| SPACUNK12.02c | SPBC20F10.06 | 0.3358386 | Novel | NO  | NO  | NO  | NO  |
| SPBC1198.09   | SPAC20H4.11c | 0.3357235 | Novel | NO  | NO  | NO  | NO  |
| SPAC4D7.05    | SPAC31G5.09c | 0.3356986 | Novel | NO  | NO  | NO  | NO  |
| SPAC22E12.14c | SPAC23C4.08  | 0.3356571 | Novel | NO  | NO  | NO  | NO  |
| SPAC31G5.09c  | SPBC32F12.09 | 0.3355799 | Novel | NO  | NO  | YES | NO  |
| SPAC24B11.11c | SPCC4G3.08   | 0.3355724 | Novel | NO  | YES | YES | NO  |
| SPAC16.01     | SPCC162.10   | 0.3355618 | Novel | NO  | NO  | NO  | NO  |
| SPAC8C9.03    | SPCC18.05c   | 0.3355512 | Novel | NO  | NO  | NO  | NO  |
| SPAC110.03    | SPBC215.13   | 0.3354285 | Novel | NO  | NO  | NO  | NO  |
| SPAC688.02c   | SPBC19F8.07  | 0.3354265 | Novel | NO  | NO  | NO  | NO  |
| SPAC24C9.07c  | SPAC821.12   | 0.33536   | Novel | NO  | NO  | NO  | NO  |
| SPBC19C7.03   | SPAC1687.15  | 0.335316  | Novel | NO  | YES | NO  | NO  |
| SPACUNK12.02c | SPAC644.14c  | 0.3352967 | Novel | NO  | YES | NO  | NO  |
| SPAC2G11.12   | SPBC211.04c  | 0.3352603 | Novel | NO  | YES | NO  | YES |
| SPCC16C4.11   | SPCC645.05c  | 0.3352065 | Novel | NO  | YES | NO  | NO  |
| SPAC821.12    | SPAC1F3.02c  | 0.3351909 | Novel | NO  | YES | YES | NO  |
| SPBC16A3.05c  | SPCC1620.11  | 0.3351777 | Novel | YES | NO  | YES | NO  |
| SPBP4H10.04   | SPAC23H4.17c | 0.3351707 | Novel | NO  | NO  | NO  | NO  |
| SPAC23H3.04   | SPCC162.07   | 0.3351322 | Novel | NO  | NO  | NO  | NO  |
| SPAC23H3.04   | SPAC23H4.13c | 0.335052  | Novel | NO  | NO  | NO  | NO  |
| SPCC18B5.11c  | SPAC2F3.15   | 0.3349965 | Novel | NO  | YES | NO  | NO  |
| SPCC16C4.11   | SPAC14C4.03  | 0.3349739 | Novel | NO  | YES | YES | NO  |
| SPBC32F12.04  | SPCC1322.12c | 0.3348192 | Novel | NO  | NO  | NO  | YES |
| SPAC23H3.04   | SPAC26A3.15c | 0.3348181 | Novel | NO  | NO  | NO  | NO  |
| SPAC110.03    | SPBC13E7.09  | 0.3348017 | Novel | NO  | YES | NO  | NO  |
| SPBC19C2.05   | SPBC19F8.07  | 0.3347835 | Novel | YES | YES | YES | NO  |
| SPCC18B5.11c  | SPCC1739.11c | 0.3346859 | Novel | YES | YES | NO  | YES |
| SPCC4E9.02    | SPBC119.02   | 0.3346552 | Novel | NO  | NO  | NO  | NO  |
| SPAC24B11.11c | SPBC1703.10  | 0.3346366 | Novel | NO  | NO  | NO  | NO  |
| SPAC4A8.05c   | SPCC4B3.15   | 0.3345955 | Novel | NO  | YES | YES | YES |
| SPAC31G5.09c  | SPBC19C2.05  | 0.3345666 | Novel | NO  | YES | YES | YES |
| SPAC1834.04   | SPAC29A4.18  | 0.3345366 | Novel | NO  | NO  | NO  | YES |
| SPBC1105.11c  | SPAC29A4.18  | 0.3345366 | Novel | NO  | YES | NO  | YES |
| SPBC8D2.04    | SPAC29A4.18  | 0.3345366 | Novel | NO  | NO  | NO  | YES |
| SPBC582.03    | SPAC23H4.02  | 0.334529  | Novel | YES | NO  | NO  | NO  |
| SPAC821.12    | SPBC1D7.05   | 0.3345069 | Novel | NO  | YES | YES | YES |
| SPAC3A11.08   | SPBC32H8.02c | 0.3345059 | Novel | NO  | NO  | NO  | NO  |

|               |               |           |       |     |     |     |     |
|---------------|---------------|-----------|-------|-----|-----|-----|-----|
| SPBC18H10.06c | SPAC227.08c   | 0.3344567 | Novel | NO  | NO  | NO  | NO  |
| SPAC31G5.09c  | SPBC1718.01   | 0.334405  | Novel | NO  | NO  | NO  | NO  |
| SPAC328.03    | SPCC320.13c   | 0.3343937 | Novel | NO  | YES | NO  | NO  |
| SPAC31G5.09c  | SPBC646.13    | 0.3343286 | Novel | NO  | NO  | NO  | NO  |
| SPCC4G3.08    | SPBC1604.14c  | 0.3343278 | Novel | NO  | YES | YES | NO  |
| SPAC19D5.01   | SPAC1687.15   | 0.3342863 | Novel | NO  | NO  | NO  | NO  |
| SPCC74.09     | SPAC29B12.06c | 0.3342699 | Novel | NO  | YES | NO  | NO  |
| SPAC16.01     | SPAC23D3.10c  | 0.3342501 | Novel | NO  | NO  | NO  | NO  |
| SPBC649.05    | SPCC18B5.11c  | 0.3341521 | Novel | YES | YES | NO  | YES |
| SPAC23H3.04   | SPAC2G11.06   | 0.3341188 | Novel | NO  | NO  | NO  | NO  |
| SPCC162.10    | SPAC20H4.11c  | 0.3341069 | Novel | NO  | NO  | NO  | NO  |
| SPBC4.04c     | SPAC2G11.12   | 0.3340866 | Novel | NO  | YES | NO  | YES |
| SPAC926.04c   | SPAC31G5.09c  | 0.3340543 | Novel | NO  | YES | NO  | NO  |
| SPAC1687.14c  | SPBC12D12.01  | 0.3339713 | Novel | NO  | NO  | NO  | NO  |
| SPCC162.10    | SPBC12D12.04c | 0.3339611 | Novel | NO  | YES | YES | NO  |
| SPBC8D2.01    | SPCC5E4.04    | 0.3339197 | Novel | YES | NO  | YES | NO  |
| SPAC4A8.05c   | SPBC4F6.12    | 0.3338255 | Novel | YES | YES | YES | YES |
| SPAC9G1.09    | SPBC12D12.04c | 0.3338045 | Novel | NO  | YES | YES | NO  |
| SPAC3C7.06c   | SPBC19F8.07   | 0.333758  | Novel | NO  | YES | YES | NO  |
| SPAC23H3.04   | SPAPB1E7.04c  | 0.3337029 | Novel | NO  | NO  | NO  | NO  |
| SPAC24B11.06c | SPAC6F6.08c   | 0.3336797 | Novel | NO  | YES | NO  | NO  |
| SPAC22E12.14c | SPBP4H10.04   | 0.3336665 | Novel | NO  | NO  | YES | NO  |
| SPBC1711.05   | SPAC644.12    | 0.3335027 | Novel | NO  | NO  | NO  | NO  |
| SPBC409.05    | SPAC1B2.05    | 0.3333668 | Novel | NO  | YES | NO  | YES |
| SPAC4A8.05c   | SPAC22H10.07  | 0.3333111 | Novel | NO  | YES | NO  | YES |
| SPBC119.08    | SPBC1861.09   | 0.3330593 | Novel | NO  | YES | YES | NO  |
| SPAC23H3.04   | SPBC25B2.01   | 0.3330572 | Novel | NO  | NO  | NO  | NO  |
| SPCC16C4.11   | SPAC9G1.02    | 0.3330123 | Novel | NO  | YES | YES | NO  |
| SPCC18B5.11c  | SPAC14C4.03   | 0.3330086 | Novel | NO  | YES | YES | YES |
| SPAC9G1.09    | SPBC1861.09   | 0.3329362 | Novel | NO  | YES | YES | NO  |
| SPCC24B10.07  | SPBC26H8.05c  | 0.332871  | Novel | NO  | NO  | NO  | NO  |
| SPBC25D12.03c | SPCC1795.11   | 0.3328237 | Novel | NO  | YES | NO  | YES |
| SPAC26F1.10c  | SPAC1687.15   | 0.3327346 | Novel | NO  | NO  | NO  | NO  |
| SPBP8B7.01c   | SPAC23H3.04   | 0.3327099 | Novel | NO  | NO  | NO  | NO  |
| SPAC23D3.10c  | SPAC20H4.11c  | 0.3326739 | Novel | NO  | NO  | NO  | NO  |
| SPAC3A11.12c  | SPBC887.04c   | 0.3326467 | Novel | NO  | NO  | NO  | NO  |
| SPBC32C12.02  | SPAC1687.15   | 0.3326414 | Novel | NO  | NO  | NO  | NO  |
| SPAC694.06c   | SPCC1682.02c  | 0.3325977 | Novel | NO  | YES | NO  | YES |
| SPAC2F3.15    | SPCC1739.11c  | 0.3325319 | Novel | NO  | NO  | NO  | YES |
| SPBC32C12.02  | SPAC23H4.17c  | 0.3325308 | Novel | NO  | NO  | YES | NO  |
| SPAC23H3.04   | SPCC24B10.10c | 0.3325249 | Novel | NO  | NO  | NO  | NO  |
| SPAC4F10.15c  | SPAC16.01     | 0.3325071 | Novel | YES | YES | YES | NO  |
| SPAC1D4.06c   | SPAC22F3.03c  | 0.3324491 | Novel | NO  | YES | NO  | YES |
| SPAC644.12    | SPAC3G6.13c   | 0.33243   | Novel | NO  | NO  | NO  | NO  |
| SPAC3F10.18c  | SPAC644.12    | 0.33243   | Novel | NO  | NO  | NO  | NO  |
| SPCC18B5.11c  | SPBC1D7.05    | 0.3324086 | Novel | NO  | YES | YES | YES |
| SPAC664.01c   | SPCC132.02    | 0.3322891 | Novel | YES | NO  | YES | NO  |

|               |               |           |       |     |     |     |     |
|---------------|---------------|-----------|-------|-----|-----|-----|-----|
| SPCC16C4.11   | SPCC18.05c    | 0.3322789 | Novel | NO  | NO  | NO  | NO  |
| SPCC4E9.02    | SPAC19B12.03  | 0.3322489 | Novel | NO  | NO  | NO  | NO  |
| SPAC31G5.09c  | SPBC887.10    | 0.332222  | Novel | NO  | NO  | NO  | NO  |
| SPBC336.04    | SPAC1B2.05    | 0.3322058 | Novel | NO  | YES | NO  | YES |
| SPBC649.05    | SPAC23H4.02   | 0.3320584 | Novel | YES | NO  | NO  | NO  |
| SPAC31G5.09c  | SPAC23C11.12  | 0.3320485 | Novel | NO  | NO  | NO  | NO  |
| SPBC1685.15c  | SPBC16A3.15c  | 0.3320441 | Novel | NO  | YES | YES | YES |
| SPBC1778.04   | SPBC1347.10   | 0.3320175 | Novel | NO  | YES | NO  | NO  |
| SPAC1687.15   | SPCC1739.11c  | 0.3319588 | Novel | NO  | NO  | NO  | NO  |
| SPCC297.03    | SPAC1687.15   | 0.3319467 | Novel | NO  | YES | YES | NO  |
| SPCC622.09    | SPCC4G3.08    | 0.3318541 | Novel | NO  | NO  | NO  | NO  |
| SPBC1778.04   | SPAC664.01c   | 0.3318183 | Novel | NO  | NO  | NO  | NO  |
| SPCC16C4.11   | SPAC1B9.02c   | 0.3317611 | Novel | NO  | YES | YES | NO  |
| SPAC23H3.04   | SPAC3G6.09c   | 0.3317173 | Novel | NO  | NO  | NO  | NO  |
| SPAC22F3.02   | SPAC664.01c   | 0.3316811 | Novel | NO  | NO  | NO  | YES |
| SPAC6F6.15    | SPAPB1A10.10c | 0.3316523 | Novel | NO  | YES | YES | NO  |
| SPCC1259.13   | SPBC32H8.10   | 0.3315631 | Novel | NO  | YES | YES | NO  |
| SPBC776.02c   | SPAC9E9.07c   | 0.3314917 | Novel | NO  | NO  | NO  | NO  |
| SPBC24C6.07   | SPAC23C11.11  | 0.3314588 | Novel | NO  | NO  | NO  | NO  |
| SPAC1D4.06c   | SPBC8D2.01    | 0.3314436 | Novel | NO  | YES | YES | NO  |
| SPCC1739.12   | SPBC106.10    | 0.3314231 | Novel | NO  | YES | NO  | NO  |
| SPAC31G5.09c  | SPCC16A11.05c | 0.3314217 | Novel | NO  | NO  | NO  | NO  |
| SPAC4A8.05c   | SPAC15A10.08  | 0.3313009 | Novel | YES | YES | YES | YES |
| SPBP16F5.04   | SPAC20H4.11c  | 0.3312662 | Novel | NO  | NO  | NO  | NO  |
| SPBC1685.01   | SPBC19F8.07   | 0.3312644 | Novel | YES | NO  | NO  | NO  |
| SPAC23H3.04   | SPAC694.05c   | 0.331258  | Novel | NO  | NO  | NO  | NO  |
| SPBC543.07    | SPAC1D4.13    | 0.3312323 | Novel | NO  | YES | YES | NO  |
| SPAC1B9.02c   | SPAC2C4.14c   | 0.3312143 | Novel | NO  | YES | YES | NO  |
| SPBC24C6.07   | SPCC320.13c   | 0.3312056 | Novel | NO  | YES | NO  | YES |
| SPBC16H5.07c  | SPCC320.13c   | 0.3311429 | Novel | NO  | NO  | NO  | NO  |
| SPBC16A3.15c  | SPBC428.20c   | 0.3311271 | Novel | NO  | NO  | NO  | YES |
| SPAC23H3.04   | SPAC458.02c   | 0.3310774 | Novel | NO  | NO  | NO  | NO  |
| SPAC23H4.17c  | SPAC2C4.14c   | 0.3310273 | Novel | NO  | YES | YES | NO  |
| SPBC16E9.11c  | SPBC16A3.05c  | 0.330992  | Novel | NO  | NO  | NO  | NO  |
| SPACUNK12.02c | SPBC12D12.04c | 0.3309327 | Novel | NO  | YES | YES | NO  |
| SPCC18B5.11c  | SPAC23H4.17c  | 0.3308342 | Novel | NO  | YES | YES | NO  |
| SPAC23H3.04   | SPBC146.05c   | 0.3307998 | Novel | NO  | NO  | NO  | NO  |
| SPAC23H3.04   | SPBC1348.05   | 0.3306899 | Novel | YES | NO  | NO  | NO  |
| SPAC16A10.04  | SPBC1D7.05    | 0.3306726 | Novel | NO  | NO  | NO  | NO  |
| SPAC57A10.02  | SPBC31F10.13c | 0.3306139 | Novel | NO  | YES | YES | YES |
| SPBC215.13    | SPAC14C4.09   | 0.3305813 | Novel | YES | NO  | NO  | NO  |
| SPCC4F11.02   | SPAC1687.15   | 0.3305276 | Novel | NO  | NO  | NO  | NO  |
| SPAC17H9.09c  | SPAC9G1.09    | 0.3305089 | Novel | NO  | NO  | NO  | YES |
| SPBC3F6.01c   | SPCC188.02    | 0.3305047 | Novel | NO  | NO  | NO  | NO  |
| SPBC1703.10   | SPAPB1A10.10c | 0.3304578 | Novel | NO  | YES | YES | NO  |
| SPCC1739.12   | SPAC23H4.17c  | 0.3304563 | Novel | NO  | NO  | NO  | NO  |
| SPAC24H6.05   | SPAC1250.03   | 0.3304491 | Novel | NO  | NO  | NO  | NO  |

|               |               |           |       |     |     |     |     |
|---------------|---------------|-----------|-------|-----|-----|-----|-----|
| SPAC9E9.07c   | SPCC1739.11c  | 0.3303663 | Novel | NO  | NO  | NO  | NO  |
| SPAC16.01     | SPBPJ4664.02  | 0.3303524 | Novel | NO  | NO  | NO  | NO  |
| SPBC1709.08   | SPBC18H10.06c | 0.3303186 | Novel | NO  | NO  | NO  | NO  |
| SPBC16A3.15c  | SPBC365.15    | 0.3303172 | Novel | NO  | NO  | NO  | YES |
| SPBC15D4.03   | SPAC23H4.02   | 0.3303154 | Novel | NO  | NO  | NO  | NO  |
| SPBC409.09c   | SPBC19F8.07   | 0.3303083 | Novel | NO  | NO  | NO  | NO  |
| SPCC4G3.08    | SPBC17F3.02   | 0.3302609 | Novel | NO  | YES | YES | NO  |
| SPBC25D12.03c | SPAC694.06c   | 0.3302564 | Novel | NO  | YES | NO  | YES |
| SPAC17H9.19c  | SPBC337.05c   | 0.3302151 | Novel | NO  | NO  | NO  | NO  |
| SPAC2F3.15    | SPAC26F1.10c  | 0.3301935 | Novel | NO  | NO  | NO  | NO  |
| SPCC24B10.07  | SPBC18H10.15  | 0.3301751 | Novel | NO  | YES | YES | NO  |
| SPBC582.03    | SPBC211.04c   | 0.3301517 | Novel | NO  | NO  | NO  | YES |
| SPCC16C4.01   | SPAC23H3.04   | 0.3301016 | Novel | YES | NO  | NO  | NO  |
| SPAC6F12.15c  | SPCC320.13c   | 0.3299737 | Novel | NO  | YES | NO  | NO  |
| SPAC57A7.08   | SPBC21.06c    | 0.3299705 | Novel | NO  | NO  | NO  | NO  |
| SPAC16.01     | SPAC9E9.07c   | 0.3299655 | Novel | NO  | YES | YES | NO  |
| SPBC405.04c   | SPAC6F6.15    | 0.3299451 | Novel | NO  | YES | YES | NO  |
| SPCC970.04c   | SPAC6F12.12   | 0.329905  | Novel | YES | NO  | NO  | YES |
| SPAC19A8.13   | SPBC20F10.09  | 0.3299011 | Novel | NO  | NO  | YES | NO  |
| SPAC56F8.16   | SPCC4G3.08    | 0.3298823 | Novel | NO  | NO  | NO  | NO  |
| SPBC11B10.09  | SPAC8E11.02c  | 0.3298748 | Novel | NO  | YES | YES | YES |
| SPBC1A4.08c   | SPAC23H3.04   | 0.3298185 | Novel | NO  | NO  | NO  | NO  |
| SPAC3A11.12c  | SPAC2C4.15c   | 0.3298002 | Novel | NO  | NO  | YES | NO  |
| SPAC19D5.01   | SPAC2F3.15    | 0.3297894 | Novel | NO  | NO  | NO  | NO  |
| SPAC823.08c   | SPAC23H3.04   | 0.3297102 | Novel | NO  | NO  | NO  | NO  |
| SPAC31G5.09c  | SPAC29A4.02c  | 0.3296506 | Novel | NO  | NO  | NO  | NO  |
| SPAC3A11.12c  | SPBC14C8.01c  | 0.3296095 | Novel | NO  | NO  | NO  | NO  |
| SPAC3A11.12c  | SPAC343.09    | 0.3295631 | Novel | NO  | NO  | NO  | NO  |
| SPBC21C3.20c  | SPCC4G3.08    | 0.3294795 | Novel | NO  | NO  | NO  | NO  |
| SPBC409.07c   | SPBC21.06c    | 0.3294268 | Novel | NO  | YES | YES | YES |
| SPAC4A8.05c   | SPCC613.04c   | 0.3293829 | Novel | YES | YES | YES | YES |
| SPAC3A11.14c  | SPBC800.05c   | 0.3293201 | Novel | NO  | NO  | YES | YES |
| SPAC31G5.09c  | SPAC9E9.13    | 0.3292904 | Novel | NO  | NO  | NO  | NO  |
| SPBC543.07    | SPCC18B5.11c  | 0.3292794 | Novel | NO  | YES | YES | NO  |
| SPAC6F12.15c  | SPCC777.10c   | 0.3292692 | Novel | NO  | NO  | NO  | NO  |
| SPBC216.06c   | SPBC1778.04   | 0.3292109 | Novel | NO  | NO  | NO  | NO  |
| SPBC15D4.14   | SPCC777.10c   | 0.329185  | Novel | NO  | NO  | NO  | NO  |
| SPAC6B12.15   | SPBC106.10    | 0.3290817 | Novel | YES | YES | NO  | NO  |
| SPAC24B11.06c | SPCC4G3.08    | 0.3290677 | Novel | NO  | YES | YES | NO  |
| SPAC1B9.02c   | SPBC11B10.09  | 0.3290278 | Novel | NO  | YES | YES | NO  |
| SPACUNK12.02c | SPAC17G8.14c  | 0.3289931 | Novel | NO  | YES | YES | NO  |
| SPBC19C7.03   | SPAC4G8.05    | 0.328907  | Novel | NO  | YES | NO  | NO  |
| SPCC4G3.05c   | SPAC22F3.03c  | 0.3288916 | Novel | NO  | YES | YES | YES |
| SPBC776.18c   | SPBC25B2.01   | 0.328839  | Novel | NO  | NO  | NO  | NO  |
| SPAC24H6.05   | SPBC32H8.10   | 0.3288137 | Novel | NO  | YES | NO  | NO  |
| SPCC1682.02c  | SPAC23C4.18c  | 0.3287407 | Novel | NO  | NO  | YES | YES |
| SPAC57A7.08   | SPAC23H4.17c  | 0.3287199 | Novel | NO  | NO  | NO  | NO  |



|               |               |           |       |     |     |     |     |
|---------------|---------------|-----------|-------|-----|-----|-----|-----|
| SPACUNK12.02c | SPAC2F3.15    | 0.3287115 | Novel | NO  | YES | NO  | NO  |
| SPAC57A10.02  | SPAC644.06c   | 0.3286484 | Novel | NO  | YES | YES | YES |
| SPAC23H3.04   | SPBPB2B2.16c  | 0.3286016 | Novel | YES | NO  | NO  | NO  |
| SPAC23H3.04   | SPAC750.02c   | 0.3286016 | Novel | YES | NO  | NO  | NO  |
| SPCC1682.16   | SPBC887.04c   | 0.3284678 | Novel | NO  | NO  | YES | NO  |
| SPBC215.13    | SPAC1F7.04    | 0.3284524 | Novel | NO  | NO  | NO  | NO  |
| SPBC3D6.09    | SPCC1682.02c  | 0.3284427 | Novel | NO  | YES | YES | YES |
| SPCC162.10    | SPAC1F3.02c   | 0.3284278 | Novel | NO  | YES | YES | NO  |
| SPAC21E11.03c | SPBC2F12.09c  | 0.3283991 | Novel | NO  | YES | YES | YES |
| SPCC576.15c   | SPAC24B11.06c | 0.328378  | Novel | YES | YES | YES | NO  |
| SPBC1539.08   | SPAC23H3.04   | 0.3283582 | Novel | NO  | NO  | NO  | NO  |
| SPBC16C6.07c  | SPAC23C4.08   | 0.3282906 | Novel | NO  | NO  | NO  | NO  |
| SPAC16A10.04  | SPBC16C6.07c  | 0.3282661 | Novel | NO  | NO  | NO  | NO  |
| SPBC1709.01   | SPBC146.13c   | 0.3282612 | Novel | NO  | YES | YES | YES |
| SPAP27G11.10c | SPCC320.13c   | 0.3282536 | Novel | NO  | NO  | NO  | NO  |
| SPAC23C4.18c  | SPAC1B2.05    | 0.3282365 | Novel | NO  | YES | YES | YES |
| SPBC1198.12   | SPBC725.16    | 0.3280926 | Novel | NO  | NO  | NO  | NO  |
| SPAC22E12.06c | SPAC5H10.11   | 0.3280635 | Novel | YES | YES | YES | NO  |
| SPBC119.08    | SPAC1782.09c  | 0.328032  | Novel | YES | YES | NO  | NO  |
| SPAC17H9.20   | SPBC1778.04   | 0.3280179 | Novel | NO  | NO  | NO  | NO  |
| SPAC9G1.09    | SPBC106.10    | 0.3279856 | Novel | NO  | YES | YES | NO  |
| SPBC16E9.17c  | SPBC19F5.01c  | 0.3279757 | Novel | NO  | YES | YES | YES |
| SPACUNK12.02c | SPAC9E9.08    | 0.3279438 | Novel | NO  | NO  | NO  | NO  |
| SPBC19C7.03   | SPBC8D2.01    | 0.3278459 | Novel | NO  | YES | NO  | NO  |
| SPBC32F12.04  | SPBC4.04c     | 0.327814  | Novel | NO  | NO  | NO  | YES |
| SPBC1778.04   | SPBC30D10.04  | 0.327771  | Novel | NO  | NO  | NO  | NO  |
| SPBC3D6.09    | SPAC1B2.05    | 0.3277517 | Novel | NO  | YES | YES | YES |
| SPCC126.02c   | SPACUNK12.02c | 0.3276931 | Novel | NO  | YES | NO  | NO  |
| SPAC23H3.04   | SPBC16H5.08c  | 0.3276605 | Novel | NO  | NO  | NO  | NO  |
| SPBC32F12.04  | SPBC3D6.04c   | 0.3276417 | Novel | NO  | NO  | NO  | YES |
| SPBC18H10.06c | SPBC776.02c   | 0.3276147 | Novel | NO  | NO  | NO  | NO  |
| SPBC1A4.02c   | SPAC1687.15   | 0.3275151 | Novel | NO  | NO  | NO  | NO  |
| SPCC16C4.11   | SPAC1565.06c  | 0.3275114 | Novel | NO  | YES | NO  | NO  |
| SPAC31G5.09c  | SPBC1734.14c  | 0.3274968 | Novel | NO  | NO  | NO  | NO  |
| SPBC1711.14   | SPAC23H3.04   | 0.3274868 | Novel | NO  | NO  | NO  | NO  |
| SPAPB2B4.03   | SPBC211.04c   | 0.327454  | Novel | NO  | NO  | NO  | YES |
| SPCC16C4.11   | SPCC4G3.08    | 0.3273248 | Novel | NO  | YES | YES | NO  |
| SPAC3G9.04    | SPBC18H10.06c | 0.3273054 | Novel | NO  | NO  | NO  | NO  |
| SPAC21E11.03c | SPCC18.05c    | 0.3272584 | Novel | NO  | NO  | NO  | NO  |
| SPAC1B9.02c   | SPAC23A1.06c  | 0.3272381 | Novel | NO  | YES | YES | NO  |
| SPBC1709.15c  | SPBC18H10.06c | 0.3271893 | Novel | NO  | NO  | NO  | NO  |
| SPAC27E2.05   | SPAC1B2.05    | 0.3271689 | Novel | NO  | YES | NO  | YES |
| SPAC821.12    | SPAC19B12.03  | 0.3271586 | Novel | NO  | NO  | YES | NO  |
| SPBC32H8.10   | SPAC2C4.14c   | 0.327126  | Novel | NO  | YES | YES | NO  |
| SPCC4G3.05c   | SPACUNK12.02c | 0.3270562 | Novel | NO  | NO  | NO  | NO  |
| SPAC16A10.04  | SPCC4G3.08    | 0.3269862 | Novel | NO  | NO  | NO  | NO  |
| SPBC32F12.04  | SPAC23H3.08c  | 0.3269819 | Novel | NO  | NO  | NO  | YES |

|               |               |           |       |     |     |     |     |
|---------------|---------------|-----------|-------|-----|-----|-----|-----|
| SPAC1B9.02c   | SPBC1604.14c  | 0.326958  | Novel | NO  | YES | YES | NO  |
| SPAC22E12.14c | SPAC2C4.14c   | 0.3269048 | Novel | NO  | YES | YES | NO  |
| SPAC22G7.10   | SPBC18H10.06c | 0.3268914 | Novel | NO  | NO  | NO  | NO  |
| SPBC19C7.03   | SPBC543.07    | 0.3268533 | Novel | NO  | YES | NO  | NO  |
| SPBC19C7.03   | SPAC2C4.14c   | 0.3268127 | Novel | NO  | YES | NO  | NO  |
| SPBC649.04    | SPAC23H3.04   | 0.3267779 | Novel | NO  | NO  | NO  | NO  |
| SPAC20H4.11c  | SPBPI4664.02  | 0.3267106 | Novel | NO  | NO  | NO  | NO  |
| SPBC354.03    | SPAC13F5.02c  | 0.3265587 | Novel | NO  | NO  | NO  | NO  |
| SPAC23C11.16  | SPBC1604.14c  | 0.3265503 | Novel | NO  | YES | YES | YES |
| SPBC649.05    | SPAC2C4.14c   | 0.3264644 | Novel | YES | NO  | NO  | NO  |
| SPCC1259.13   | SPAC23H4.02   | 0.3263943 | Novel | YES | YES | YES | NO  |
| SPBC32F12.04  | SPAC30C2.02   | 0.3263807 | Novel | NO  | NO  | NO  | YES |
| SPBC3F6.01c   | SPBC11B10.09  | 0.3262527 | Novel | NO  | NO  | NO  | NO  |
| SPBC582.03    | SPBC25D12.03c | 0.3262272 | Novel | NO  | NO  | NO  | YES |
| SPCC16C4.11   | SPBC4.04c     | 0.3262254 | Novel | NO  | YES | NO  | NO  |
| SPAC2G11.12   | SPAC22F3.03c  | 0.3262138 | Novel | NO  | YES | YES | YES |
| SPAC328.03    | SPCC4G3.08    | 0.3260954 | Novel | NO  | NO  | NO  | NO  |
| SPBC16G5.12c  | SPAC22F3.03c  | 0.3259795 | Novel | NO  | YES | NO  | YES |
| SPAPB2B4.03   | SPBC25D12.03c | 0.3259522 | Novel | NO  | NO  | NO  | YES |
| SPBC211.04c   | SPAC8F11.07c  | 0.3259519 | Novel | NO  | NO  | NO  | YES |
| SPBC1D7.05    | SPCC320.13c   | 0.3259394 | Novel | NO  | YES | NO  | NO  |
| SPBC17F3.02   | SPBC19F8.07   | 0.3258644 | Novel | YES | YES | YES | YES |
| SPBC1711.17   | SPAC23H3.04   | 0.325862  | Novel | NO  | NO  | NO  | NO  |
| SPCC1682.16   | SPAC2C4.15c   | 0.325821  | Novel | NO  | NO  | YES | NO  |
| SPAC23H3.04   | SPBC29A3.09c  | 0.3258061 | Novel | NO  | NO  | NO  | NO  |
| SPBC1105.04c  | SPBC15D4.03   | 0.3257889 | Novel | YES | YES | YES | YES |
| SPAC23H3.04   | SPAC24C9.04   | 0.3257829 | Novel | NO  | NO  | YES | NO  |
| SPBC16A3.15c  | SPBC211.06    | 0.3256799 | Novel | NO  | NO  | NO  | YES |
| SPAC31G5.09c  | SPAC29B12.03  | 0.3256441 | Novel | NO  | NO  | NO  | NO  |
| SPAP27G11.10c | SPCC4G3.08    | 0.32563   | Novel | NO  | NO  | NO  | NO  |
| SPCC16A11.12c | SPBC409.05    | 0.3256067 | Novel | NO  | NO  | NO  | NO  |
| SPCC18.05c    | SPBC29B5.01   | 0.3255968 | Novel | NO  | NO  | NO  | NO  |
| SPAC644.06c   | SPAC2C4.14c   | 0.3255759 | Novel | YES | YES | YES | NO  |
| SPBC713.05    | SPBC409.05    | 0.3255649 | Novel | NO  | NO  | NO  | NO  |
| SPAC22E12.14c | SPBC17F3.02   | 0.3255478 | Novel | NO  | YES | YES | NO  |
| SPAC343.09    | SPCC1682.16   | 0.3255082 | Novel | NO  | NO  | YES | NO  |
| SPBC106.10    | SPAC23C4.08   | 0.3254924 | Novel | NO  | YES | NO  | NO  |
| SPBC649.05    | SPBC32C12.03c | 0.3254038 | Novel | NO  | NO  | NO  | NO  |
| SPBC8D2.10c   | SPBC25B2.01   | 0.3253434 | Novel | YES | NO  | NO  | NO  |
| SPBC16A3.15c  | SPCC4G3.19    | 0.3253254 | Novel | NO  | NO  | YES | YES |
| SPCC16C4.11   | SPBC216.05    | 0.325322  | Novel | NO  | YES | NO  | NO  |
| SPBC16A3.15c  | SPBC2F12.13   | 0.325266  | Novel | NO  | YES | YES | YES |
| SPBC19C7.03   | SPBC18H10.15  | 0.3252369 | Novel | NO  | YES | NO  | NO  |
| SPAC20G8.05c  | SPCC320.13c   | 0.3252209 | Novel | NO  | YES | NO  | NO  |
| SPCC16C4.11   | SPBC25D12.03c | 0.3252161 | Novel | NO  | YES | NO  | NO  |
| SPAC644.06c   | SPAC1687.15   | 0.3251212 | Novel | NO  | YES | YES | NO  |
| SPAC16A10.04  | SPBC646.06c   | 0.3251155 | Novel | NO  | NO  | NO  | NO  |

|               |               |           |       |     |     |     |     |
|---------------|---------------|-----------|-------|-----|-----|-----|-----|
| SPBC16E9.10c  | SPAC3G6.02    | 0.3250759 | Novel | NO  | NO  | NO  | NO  |
| SPBC1D7.05    | SPBP4H10.04   | 0.3250087 | Novel | NO  | NO  | NO  | NO  |
| SPAC24B11.06c | SPAC14C4.03   | 0.3249324 | Novel | NO  | YES | YES | YES |
| SPBC1685.15c  | SPBC800.05c   | 0.3247971 | Novel | NO  | YES | YES | YES |
| SPACUNK12.02c | SPAC694.06c   | 0.3247785 | Novel | NO  | NO  | NO  | NO  |
| SPCC18B5.11c  | SPBC12D12.04c | 0.3247043 | Novel | YES | YES | YES | NO  |
| SPAC630.14c   | SPCC18.05c    | 0.3247012 | Novel | YES | NO  | NO  | NO  |
| SPBC13E7.09   | SPAC23C4.08   | 0.32462   | Novel | NO  | YES | NO  | NO  |
| SPCC1753.02c  | SPAC821.12    | 0.3245737 | Novel | NO  | NO  | NO  | NO  |
| SPAC23H3.04   | SPBC4F6.14    | 0.3245665 | Novel | NO  | NO  | NO  | NO  |
| SPBC409.07c   | SPBC1604.14c  | 0.3245312 | Novel | NO  | YES | YES | YES |
| SPAC23H3.04   | SPCC24B10.11c | 0.3244923 | Novel | NO  | NO  | NO  | NO  |
| SPAC6F12.15c  | SPCC4G3.08    | 0.3244619 | Novel | NO  | NO  | NO  | NO  |
| SPAC23A1.06c  | SPCC320.13c   | 0.32446   | Novel | NO  | YES | NO  | NO  |
| SPBC428.12c   | SPAC23H3.04   | 0.3244499 | Novel | NO  | NO  | YES | NO  |
| SPAC24B11.11c | SPACUNK12.02c | 0.3244371 | Novel | NO  | YES | YES | NO  |
| SPBC11B10.09  | SPBC1861.09   | 0.3244363 | Novel | NO  | YES | YES | NO  |
| SPAC24H6.03   | SPCC16A11.12c | 0.3244361 | Novel | NO  | NO  | NO  | NO  |
| SPBC409.07c   | SPBC1289.11   | 0.3244288 | Novel | NO  | NO  | NO  | NO  |
| SPBC16A3.15c  | SPBC20F10.06  | 0.3243917 | Novel | NO  | NO  | NO  | YES |
| SPCC1259.13   | SPBC32C12.03c | 0.3243405 | Novel | NO  | YES | YES | NO  |
| SPBC8D2.01    | SPCC4F11.02   | 0.3242993 | Novel | NO  | NO  | NO  | NO  |
| SPBC365.07c   | SPAC23H3.04   | 0.324299  | Novel | YES | NO  | NO  | NO  |
| SPAC21E11.03c | SPBC11B10.09  | 0.3242853 | Novel | NO  | NO  | NO  | NO  |
| SPBC800.05c   | SPBC428.20c   | 0.3242829 | Novel | NO  | NO  | YES | YES |
| SPAC16A10.07c | SPACUNK12.02c | 0.3242541 | Novel | NO  | NO  | NO  | NO  |
| SPCC1682.02c  | SPAC14C4.13   | 0.3242483 | Novel | NO  | YES | NO  | YES |
| SPAC22H10.04  | SPCC24B10.07  | 0.3242424 | Novel | NO  | NO  | NO  | NO  |
| SPAC1F7.04    | SPAC23D3.10c  | 0.32421   | Novel | NO  | NO  | NO  | NO  |
| SPBPB2B2.16c  | SPAC22H12.02  | 0.3241793 | Novel | NO  | NO  | NO  | NO  |
| SPAC750.02c   | SPAC22H12.02  | 0.3241793 | Novel | NO  | NO  | NO  | NO  |
| SPBC19C2.05   | SPAC1B3.11c   | 0.3241376 | Novel | NO  | NO  | NO  | NO  |
| SPAC57A10.02  | SPBC119.08    | 0.3240872 | Novel | NO  | YES | YES | NO  |
| SPAPB15E9.01c | SPAC821.12    | 0.3240642 | Novel | NO  | NO  | NO  | NO  |
| SPBC776.02c   | SPCC320.13c   | 0.3239603 | Novel | NO  | NO  | NO  | NO  |
| SPBC409.04c   | SPBC19F8.07   | 0.3239583 | Novel | YES | NO  | NO  | NO  |
| SPAC11E3.09   | SPBC119.08    | 0.3239437 | Novel | YES | NO  | NO  | NO  |
| SPBC6B1.07    | SPBC17D1.06   | 0.3239357 | Novel | NO  | NO  | NO  | NO  |
| SPBC405.04c   | SPBC1703.10   | 0.3238663 | Novel | NO  | YES | YES | NO  |
| SPBC336.04    | SPACUNK12.02c | 0.3238407 | Novel | NO  | NO  | NO  | NO  |
| SPAC4F10.13c  | SPBC16E9.11c  | 0.3238214 | Novel | NO  | NO  | NO  | NO  |
| SPBC354.03    | SPAC29E6.08   | 0.3238123 | Novel | NO  | NO  | NO  | NO  |
| SPAC110.03    | SPBC19C2.05   | 0.323802  | Novel | NO  | YES | NO  | NO  |
| SPAC1F7.04    | SPBPJ4664.02  | 0.3237594 | Novel | NO  | NO  | NO  | NO  |
| SPCC16A11.17  | SPAC1006.07   | 0.3237416 | Novel | NO  | YES | NO  | NO  |
| SPCC16C4.11   | SPAC7D4.15c   | 0.323706  | Novel | NO  | NO  | NO  | NO  |
| SPAC29A4.16   | SPAC23H4.17c  | 0.3236235 | Novel | NO  | YES | YES | NO  |

|               |               |           |       |     |     |     |     |
|---------------|---------------|-----------|-------|-----|-----|-----|-----|
| SPACUNK12.02c | SPBC106.10    | 0.3236193 | Novel | NO  | YES | YES | NO  |
| SPAC24H6.05   | SPCC4G3.08    | 0.3235623 | Novel | NO  | NO  | NO  | NO  |
| SPBC4B4.07c   | SPAC644.12    | 0.3235242 | Novel | NO  | NO  | YES | NO  |
| SPBC365.15    | SPBC800.05c   | 0.3234929 | Novel | NO  | NO  | YES | YES |
| SPBC1921.03c  | SPCC1620.11   | 0.3234694 | Novel | YES | NO  | YES | NO  |
| SPAC23H3.04   | SPCC285.12    | 0.3234678 | Novel | NO  | NO  | NO  | NO  |
| SPBC16E9.11c  | SPBC26H8.01   | 0.3234432 | Novel | NO  | NO  | NO  | NO  |
| SPAC22E12.14c | SPAC16A10.04  | 0.3234259 | Novel | NO  | NO  | NO  | NO  |
| SPAC1687.13c  | SPCC16A11.12c | 0.3233907 | Novel | NO  | NO  | NO  | NO  |
| SPBC32F12.09  | SPAC227.12    | 0.323334  | Novel | NO  | NO  | NO  | NO  |
| SPAC22F3.03c  | SPAC14C4.13   | 0.3233141 | Novel | NO  | YES | NO  | YES |
| SPCC1259.15c  | SPAC16.01     | 0.3232924 | Novel | NO  | NO  | NO  | NO  |
| SPAC823.15    | SPAC23H4.17c  | 0.3232888 | Novel | NO  | NO  | NO  | NO  |
| SPAC23H3.04   | SPAC10F6.08c  | 0.3232688 | Novel | NO  | NO  | NO  | NO  |
| SPBC29A10.15  | SPAC1B2.05    | 0.3231886 | Novel | YES | YES | YES | YES |
| SPBC215.13    | SPAC20H4.11c  | 0.3231776 | Novel | NO  | NO  | NO  | NO  |
| SPBC17D1.06   | SPBC14C8.07c  | 0.3231513 | Novel | NO  | YES | NO  | NO  |
| SPBC18H10.15  | SPCC320.13c   | 0.3231326 | Novel | NO  | YES | NO  | NO  |
| SPCC1259.13   | SPAC821.12    | 0.323126  | Novel | NO  | YES | YES | NO  |
| SPCC16C4.11   | SPAC23C4.18c  | 0.3231009 | Novel | NO  | YES | YES | NO  |
| SPCC18B5.03   | SPCC1322.08   | 0.3230537 | Novel | NO  | YES | NO  | YES |
| SPCC16A11.12c | SPBC215.03c   | 0.32305   | Novel | NO  | NO  | NO  | NO  |
| SPBC11B10.09  | SPAC688.02c   | 0.3229689 | Novel | NO  | YES | NO  | NO  |
| SPAC8F11.07c  | SPBC25B2.01   | 0.3229635 | Novel | NO  | NO  | NO  | NO  |
| SPAPB2B4.03   | SPAC2F3.15    | 0.3229396 | Novel | NO  | NO  | NO  | NO  |
| SPBC19G7.05c  | SPCC320.13c   | 0.3228035 | Novel | NO  | NO  | NO  | NO  |
| SPCC364.02c   | SPAC1B2.05    | 0.3227952 | Novel | NO  | NO  | NO  | YES |
| SPCC16C4.09   | SPBC106.10    | 0.3227884 | Novel | YES | NO  | NO  | NO  |
| SPCC4E9.02    | SPCC1840.02c  | 0.3227875 | Novel | NO  | NO  | NO  | NO  |
| SPBC543.07    | SPBC1604.14c  | 0.3227518 | Novel | NO  | YES | YES | NO  |
| SPBC2D10.14c  | SPAP8A3.08    | 0.3227092 | Novel | YES | NO  | YES | NO  |
| SPBC11B10.09  | SPCC1183.02   | 0.3226672 | Novel | NO  | NO  | NO  | NO  |
| SPAC57A7.08   | SPBP35G2.03c  | 0.3226008 | Novel | NO  | NO  | NO  | NO  |
| SPBC32C12.02  | SPBC8D2.01    | 0.3225031 | Novel | NO  | NO  | NO  | NO  |
| SPBC215.13    | SPAC16.01     | 0.3224159 | Novel | NO  | NO  | NO  | NO  |
| SPAC23H3.04   | SPBC3D6.15    | 0.3223881 | Novel | NO  | NO  | NO  | NO  |
| SPACUNK12.02c | SPAC17A5.11   | 0.3223868 | Novel | NO  | YES | NO  | NO  |
| SPAC57A7.08   | SPCC18B5.03   | 0.3223715 | Novel | NO  | NO  | NO  | NO  |
| SPAC23H3.04   | SPAC1639.02c  | 0.3223153 | Novel | YES | NO  | NO  | NO  |
| SPBC1703.10   | SPAC17G6.04c  | 0.3223141 | Novel | NO  | NO  | NO  | NO  |
| SPAC23H3.04   | SPAC1F5.10    | 0.3222925 | Novel | NO  | NO  | NO  | NO  |
| SPBC19C7.03   | SPBC24C6.06   | 0.3222913 | Novel | NO  | NO  | NO  | YES |
| SPCC24B10.07  | SPAC2F3.15    | 0.3222902 | Novel | NO  | YES | NO  | NO  |
| SPCC162.10    | SPAC17G8.14c  | 0.3222629 | Novel | NO  | YES | YES | NO  |
| SPAC1D4.04    | SPAC23H3.04   | 0.3222588 | Novel | NO  | NO  | NO  | NO  |
| SPAC2F7.03c   | SPAC644.06c   | 0.3221545 | Novel | NO  | YES | YES | NO  |
| SPAC23H3.04   | SPAC23C11.08  | 0.3221419 | Novel | NO  | NO  | NO  | NO  |

|               |               |           |       |     |     |     |     |
|---------------|---------------|-----------|-------|-----|-----|-----|-----|
| SPAC24B11.06c | SPBC21.06c    | 0.3221418 | Novel | NO  | YES | YES | NO  |
| SPBC1A4.02c   | SPBC8D2.01    | 0.3221293 | Novel | NO  | NO  | NO  | NO  |
| SPBC11B10.09  | SPAC23C11.11  | 0.3221206 | Novel | NO  | YES | YES | NO  |
| SPAC22H12.02  | SPBC1348.05   | 0.3221107 | Novel | NO  | NO  | NO  | NO  |
| SPCC16C4.11   | SPBC216.06c   | 0.3220612 | Novel | NO  | YES | NO  | NO  |
| SPBC19C2.05   | SPAC20H4.11c  | 0.3218998 | Novel | NO  | NO  | NO  | NO  |
| SPBC8D2.01    | SPAC29A4.16   | 0.3218568 | Novel | NO  | YES | YES | NO  |
| SPBC1105.04c  | SPCC1682.02c  | 0.3218457 | Novel | NO  | NO  | YES | YES |
| SPBC23E6.09   | SPCC18.05c    | 0.3218057 | Novel | YES | NO  | NO  | NO  |
| SPBC19C2.05   | SPBC1604.14c  | 0.3217958 | Novel | NO  | YES | YES | NO  |
| SPBC1D7.05    | SPAC23C11.16  | 0.3217597 | Novel | YES | YES | YES | NO  |
| SPBC3F6.01c   | SPBP35G2.03c  | 0.3215933 | Novel | NO  | NO  | NO  | NO  |
| SPAC23H3.04   | SPAC29A4.09   | 0.3215445 | Novel | NO  | NO  | NO  | NO  |
| SPBC16A3.05c  | SPAC11G7.02   | 0.3215421 | Novel | NO  | NO  | NO  | NO  |
| SPAC3C7.03c   | SPAC22F3.03c  | 0.3214471 | Novel | NO  | YES | YES | YES |
| SPCC1259.15c  | SPBC354.03    | 0.3213649 | Novel | NO  | NO  | NO  | NO  |
| SPBC18H10.15  | SPAC29A4.16   | 0.3212626 | Novel | NO  | YES | YES | NO  |
| SPAC1B9.02c   | SPACUNK12.02c | 0.3212142 | Novel | NO  | YES | YES | NO  |
| SPBC543.07    | SPCC5E4.04    | 0.3211478 | Novel | YES | NO  | NO  | NO  |
| SPAC1B9.02c   | SPCC18B5.11c  | 0.3211045 | Novel | NO  | YES | YES | NO  |
| SPAPB15E9.01c | SPAC16.01     | 0.321083  | Novel | NO  | NO  | NO  | NO  |
| SPACUNK12.02c | SPAPB1E7.02c  | 0.3210713 | Novel | NO  | NO  | NO  | NO  |
| SPACUNK12.02c | SPBC16D10.09  | 0.3209202 | Novel | NO  | NO  | NO  | NO  |
| SPCC24B10.07  | SPBC14C8.01c  | 0.320864  | Novel | NO  | NO  | NO  | NO  |
| SPBC11B10.09  | SPCC1919.01   | 0.3207882 | Novel | NO  | YES | YES | NO  |
| SPBC18H10.15  | SPCC5E4.04    | 0.320765  | Novel | NO  | NO  | NO  | NO  |
| SPBC713.05    | SPAC23H3.04   | 0.3207452 | Novel | NO  | NO  | NO  | NO  |
| SPCC5E4.04    | SPAC2C4.14c   | 0.3206984 | Novel | NO  | NO  | NO  | NO  |
| SPBC800.05c   | SPAC1B2.05    | 0.320698  | Novel | NO  | NO  | NO  | YES |
| SPAC144.01    | SPAC23H3.04   | 0.3206869 | Novel | NO  | NO  | YES | NO  |
| SPAC1F7.04    | SPBC1861.09   | 0.3206583 | Novel | NO  | NO  | NO  | NO  |
| SPAC821.12    | SPCC1739.12   | 0.3206061 | Novel | NO  | YES | YES | NO  |
| SPBC215.15    | SPAC23H3.04   | 0.3205627 | Novel | YES | NO  | NO  | NO  |
| SPAC1D4.06c   | SPAC9G1.09    | 0.3205267 | Novel | NO  | YES | YES | NO  |
| SPBC1718.07c  | SPCC320.13c   | 0.3204923 | Novel | NO  | YES | YES | NO  |
| SPBC17D1.06   | SPCC16A11.17  | 0.3204694 | Novel | NO  | YES | NO  | NO  |
| SPBC4.04c     | SPBC17D1.06   | 0.3204132 | Novel | NO  | YES | NO  | NO  |
| SPAC16.01     | SPBC18H10.15  | 0.3203545 | Novel | NO  | NO  | NO  | NO  |
| SPACUNK12.02c | SPAC1B2.05    | 0.3203516 | Novel | NO  | YES | NO  | NO  |
| SPAC57A7.08   | SPAC6F12.12   | 0.3203357 | Novel | NO  | NO  | NO  | NO  |
| SPACUNK12.02c | SPAC13G7.08c  | 0.3203317 | Novel | NO  | NO  | NO  | NO  |
| SPAC23H3.04   | SPCP31B10.07  | 0.3202735 | Novel | NO  | NO  | NO  | NO  |
| SPAC23H3.04   | SPAC513.01c   | 0.3202735 | Novel | NO  | NO  | NO  | NO  |
| SPACUNK12.02c | SPAC29A4.16   | 0.3202665 | Novel | NO  | YES | YES | NO  |
| SPBC32H8.10   | SPAC6F6.08c   | 0.320261  | Novel | NO  | YES | NO  | NO  |
| SPACUNK12.02c | SPAC20G8.01   | 0.3202582 | Novel | NO  | YES | NO  | NO  |
| SPAC16.01     | SPBC1198.09   | 0.3202461 | Novel | NO  | NO  | NO  | NO  |

|               |               |           |       |     |     |     |     |
|---------------|---------------|-----------|-------|-----|-----|-----|-----|
| SPAPB2B4.03   | SPCC18.05c    | 0.3202349 | Novel | NO  | NO  | NO  | NO  |
| SPAC31G5.09c  | SPBC8D2.19    | 0.3202182 | Novel | NO  | YES | YES | NO  |
| SPAC6F6.08c   | SPCC18B5.11c  | 0.3201976 | Novel | NO  | YES | NO  | NO  |
| SPAC18B11.10  | SPCC16C4.11   | 0.3201587 | Novel | NO  | YES | NO  | NO  |
| SPAC1B9.02c   | SPAC1F3.02c   | 0.3201345 | Novel | NO  | YES | YES | NO  |
| SPBC21.06c    | SPACUNK12.02c | 0.320133  | Novel | NO  | YES | YES | NO  |
| SPBC713.06    | SPAC23H3.04   | 0.3201305 | Novel | NO  | NO  | NO  | NO  |
| SPAC23H3.04   | SPBC3D6.08c   | 0.3200691 | Novel | NO  | NO  | NO  | NO  |
| SPACUNK12.02c | SPAC1782.09c  | 0.3200418 | Novel | NO  | NO  | NO  | NO  |
| SPBC3F6.01c   | SPBC26H8.05c  | 0.320026  | Novel | NO  | YES | YES | NO  |
| SPAC19G12.14  | SPBC106.10    | 0.319979  | Novel | NO  | YES | NO  | NO  |
| SPAPB15E9.01c | SPAC20H4.11c  | 0.3199096 | Novel | NO  | NO  | NO  | NO  |
| SPAC24B11.11c | SPBC409.07c   | 0.3198846 | Novel | NO  | YES | YES | NO  |
| SPCC1753.02c  | SPBC24C6.06   | 0.3197145 | Novel | NO  | NO  | YES | NO  |
| SPCC576.15c   | SPBC119.08    | 0.3197138 | Novel | YES | YES | YES | YES |
| SPAC644.04    | SPCC18.05c    | 0.3196571 | Novel | NO  | NO  | NO  | NO  |
| SPCC16C4.11   | SPAC17D4.02   | 0.3196546 | Novel | NO  | YES | NO  | NO  |
| SPAC4D7.03    | SPAC29E6.01   | 0.3196531 | Novel | NO  | YES | NO  | NO  |
| SPAC24C9.07c  | SPBC18H10.15  | 0.3196524 | Novel | NO  | NO  | NO  | NO  |
| SPBC3B8.02    | SPCC18.05c    | 0.3196353 | Novel | NO  | NO  | NO  | NO  |
| SPAC144.13c   | SPCC320.13c   | 0.3196218 | Novel | NO  | NO  | NO  | NO  |
| SPBC1D7.05    | SPAC2F3.15    | 0.3195993 | Novel | NO  | YES | NO  | NO  |
| SPAC23H3.04   | SPBC3D6.12    | 0.319598  | Novel | NO  | NO  | NO  | NO  |
| SPBC428.12c   | SPBC6B1.07    | 0.319576  | Novel | NO  | NO  | NO  | NO  |
| SPBC800.05c   | SPBC20F10.06  | 0.3195652 | Novel | NO  | NO  | NO  | YES |
| SPBC11B10.09  | SPAC227.12    | 0.319543  | Novel | NO  | NO  | NO  | NO  |
| SPBC24C6.06   | SPAC1A6.04c   | 0.3195052 | Novel | NO  | NO  | NO  | NO  |
| SPBC24C6.06   | SPAC17C9.10   | 0.3193626 | Novel | NO  | NO  | NO  | NO  |
| SPBC354.03    | SPAC22H12.02  | 0.3193457 | Novel | YES | NO  | YES | NO  |
| SPAC13G6.12c  | SPCC1739.11c  | 0.3193273 | Novel | NO  | NO  | NO  | YES |
| SPBC24C6.06   | SPCC285.09c   | 0.3193197 | Novel | NO  | NO  | NO  | NO  |
| SPAC13G6.12c  | SPBC106.20    | 0.3192354 | Novel | NO  | NO  | NO  | YES |
| SPCC16C4.11   | SPCC188.02    | 0.3192107 | Novel | NO  | NO  | NO  | NO  |
| SPAC18G6.15   | SPBC32F12.04  | 0.3190927 | Novel | NO  | NO  | NO  | YES |
| SPAC821.09    | SPBC646.06c   | 0.3190829 | Novel | YES | NO  | YES | NO  |
| SPAC16A10.04  | SPBC106.10    | 0.3190647 | Novel | NO  | NO  | NO  | NO  |
| SPAC23H3.04   | SPAC57A10.09c | 0.319034  | Novel | NO  | NO  | NO  | NO  |
| SPBC16H5.07c  | SPAC23H4.17c  | 0.3190121 | Novel | NO  | NO  | NO  | NO  |
| SPAC24B11.06c | SPAC22F3.02   | 0.3189793 | Novel | NO  | NO  | NO  | YES |
| SPAC23H3.04   | SPAC22F3.15   | 0.318915  | Novel | NO  | NO  | YES | NO  |
| SPBC32F12.04  | SPAC31G5.11   | 0.3189023 | Novel | NO  | NO  | NO  | YES |
| SPAC23H3.04   | SPAC589.03c   | 0.3188621 | Novel | NO  | NO  | YES | NO  |
| SPAC13G6.12c  | SPBC24C6.07   | 0.3187998 | Novel | NO  | NO  | NO  | YES |
| SPAC9G1.09    | SPAC644.06c   | 0.318719  | Novel | NO  | YES | YES | NO  |
| SPAC30D11.10  | SPAC22F3.03c  | 0.3186841 | Novel | NO  | NO  | YES | YES |
| SPCC970.04c   | SPBC1861.09   | 0.3186412 | Novel | NO  | NO  | YES | NO  |
| SPBP4H10.04   | SPBC1861.09   | 0.3186371 | Novel | NO  | NO  | YES | NO  |

|               |               |           |       |     |     |     |     |
|---------------|---------------|-----------|-------|-----|-----|-----|-----|
| SPAC23H3.04   | SPAC4G8.05    | 0.3186335 | Novel | NO  | NO  | NO  | NO  |
| SPBC409.07c   | SPCC24B10.07  | 0.3186255 | Novel | NO  | YES | YES | NO  |
| SPACUNK12.02c | SPCC24B10.07  | 0.3186134 | Novel | NO  | YES | YES | NO  |
| SPAC4H3.05    | SPAC22F3.03c  | 0.3185746 | Novel | NO  | YES | NO  | YES |
| SPBC211.06    | SPBC800.05c   | 0.318463  | Novel | NO  | NO  | YES | YES |
| SPAC9G1.09    | SPAC17G8.14c  | 0.3184174 | Novel | NO  | YES | YES | NO  |
| SPAC23H3.04   | SPAC823.03    | 0.3182959 | Novel | NO  | NO  | NO  | NO  |
| SPBC2F12.13   | SPBC800.05c   | 0.3182817 | Novel | NO  | YES | YES | YES |
| SPAC23C11.16  | SPBC11C11.02  | 0.31828   | Novel | YES | YES | YES | YES |
| SPAC24B11.06c | SPAC23C4.19   | 0.3181787 | Novel | NO  | YES | NO  | NO  |
| SPAC23H3.04   | SPBC17D1.06   | 0.3181694 | Novel | NO  | NO  | NO  | NO  |
| SPBC31F10.13c | SPAC644.06c   | 0.318157  | Novel | NO  | NO  | NO  | YES |
| SPCC16C4.11   | SPAC13G7.08c  | 0.3181094 | Novel | NO  | NO  | NO  | NO  |
| SPAC23H3.04   | SPCC825.01    | 0.3181019 | Novel | NO  | NO  | NO  | NO  |
| SPBC32H8.10   | SPCC18B5.11c  | 0.3180669 | Novel | NO  | YES | YES | NO  |
| SPBC32H8.10   | SPCC1322.08   | 0.3180665 | Novel | NO  | YES | YES | NO  |
| SPBC800.05c   | SPCC4G3.19    | 0.318061  | Novel | NO  | NO  | YES | YES |
| SPBC215.04    | SPBC24C6.06   | 0.3180315 | Novel | YES | YES | NO  | NO  |
| SPAC23H3.04   | SPAC17A2.08c  | 0.3179759 | Novel | NO  | NO  | YES | NO  |
| SPBC216.06c   | SPAC1B2.05    | 0.3179492 | Novel | NO  | YES | NO  | YES |
| SPBC354.03    | SPAC2G11.14   | 0.3178951 | Novel | NO  | NO  | NO  | NO  |
| SPAC821.12    | SPCC162.10    | 0.3178126 | Novel | NO  | YES | YES | NO  |
| SPBC409.07c   | SPAC1F5.09c   | 0.3177624 | Novel | NO  | YES | YES | YES |
| SPAC23H3.04   | SPAC1071.08   | 0.31773   | Novel | NO  | NO  | NO  | NO  |
| SPBC1D7.05    | SPAC1F3.02c   | 0.3177245 | Novel | YES | YES | YES | YES |
| SPAC1F7.04    | SPBC13E7.09   | 0.3176936 | Novel | YES | YES | NO  | NO  |
| SPAC821.12    | SPCC1840.02c  | 0.3176917 | Novel | NO  | NO  | NO  | NO  |
| SPAC24B11.11c | SPBC18H10.15  | 0.3176727 | Novel | NO  | YES | YES | NO  |
| SPAC23H3.04   | SPAC227.02c   | 0.3176537 | Novel | NO  | NO  | NO  | NO  |
| SPAC1006.07   | SPBC14C8.07c  | 0.3176511 | Novel | NO  | YES | NO  | NO  |
| SPCC31H12.05c | SPAC2F3.15    | 0.3176424 | Novel | YES | NO  | NO  | NO  |
| SPBC2D10.14c  | SPAC23H3.04   | 0.3174726 | Novel | NO  | NO  | NO  | NO  |
| SPBC30D10.10c | SPCC320.13c   | 0.3174423 | Novel | NO  | YES | NO  | NO  |
| SPACUNK12.02c | SPBC17D11.06  | 0.3174051 | Novel | NO  | NO  | NO  | NO  |
| SPBC1105.09   | SPCC338.05c   | 0.3173987 | Novel | NO  | YES | YES | NO  |
| SPBC216.07c   | SPAC821.12    | 0.3173751 | Novel | NO  | YES | YES | NO  |
| SPAC2F3.15    | SPBC776.02c   | 0.3173107 | Novel | NO  | NO  | NO  | NO  |
| SPCC5E4.04    | SPAC1B2.05    | 0.3173    | Novel | YES | YES | NO  | YES |
| SPCC757.09c   | SPBC19F8.07   | 0.3172907 | Novel | NO  | NO  | NO  | NO  |
| SPBC409.07c   | SPAC23C11.16  | 0.3172751 | Novel | YES | YES | YES | YES |
| SPBC32C12.03c | SPAC821.08c   | 0.3172697 | Novel | NO  | NO  | NO  | NO  |
| SPAC24B11.11c | SPBC12D12.04c | 0.317263  | Novel | NO  | YES | YES | YES |
| SPBC1685.06   | SPAC23H3.04   | 0.3172569 | Novel | NO  | NO  | NO  | NO  |
| SPCC16C4.11   | SPBC30D10.10c | 0.3171761 | Novel | NO  | YES | NO  | NO  |
| SPBC211.04c   | SPCC1795.11   | 0.3171017 | Novel | NO  | YES | NO  | YES |
| SPCC297.03    | SPBC8D2.01    | 0.3170991 | Novel | YES | YES | YES | NO  |
| SPAC22F3.02   | SPAC26A3.16   | 0.3169992 | Novel | NO  | NO  | YES | YES |

|               |               |           |       |     |     |     |     |
|---------------|---------------|-----------|-------|-----|-----|-----|-----|
| SPBC21.06c    | SPBC119.08    | 0.3169945 | Novel | NO  | YES | YES | YES |
| SPAC6B12.15   | SPCC4G3.08    | 0.3169939 | Novel | NO  | NO  | NO  | NO  |
| SPAC6G10.12c  | SPBC17F3.02   | 0.3169854 | Novel | YES | NO  | YES | NO  |
| SPCC1259.13   | SPAC1687.15   | 0.3168638 | Novel | NO  | YES | YES | NO  |
| SPBC9B6.05c   | SPAC19A8.13   | 0.3168416 | Novel | NO  | NO  | YES | NO  |
| SPAC1D4.13    | SPAC17G8.14c  | 0.3168408 | Novel | NO  | YES | YES | NO  |
| SPCC162.10    | SPBC11B10.09  | 0.3168287 | Novel | NO  | YES | YES | NO  |
| SPBC14F5.08   | SPBC19F8.07   | 0.3167925 | Novel | NO  | NO  | NO  | NO  |
| SPAC20H4.11c  | SPBC1861.09   | 0.316737  | Novel | NO  | NO  | NO  | NO  |
| SPAC24B11.06c | SPBC17F3.02   | 0.3166834 | Novel | YES | YES | YES | YES |
| SPBC32F12.09  | SPAC29E6.01   | 0.3166597 | Novel | NO  | NO  | NO  | NO  |
| SPCC417.06c   | SPAC823.15    | 0.3166543 | Novel | NO  | NO  | YES | NO  |
| SPCC31H12.05c | SPCC320.13c   | 0.3164683 | Novel | NO  | NO  | NO  | NO  |
| SPBC1861.09   | SPBC17F3.02   | 0.3164606 | Novel | NO  | YES | YES | NO  |
| SPAC23H3.04   | SPBC211.07c   | 0.3164179 | Novel | NO  | NO  | NO  | NO  |
| SPBC582.03    | SPBC119.08    | 0.3163531 | Novel | NO  | YES | NO  | NO  |
| SPACUNK12.02c | SPBC25B2.05   | 0.3163427 | Novel | NO  | NO  | NO  | NO  |
| SPBC11C11.04c | SPBC31F10.06c | 0.3163108 | Novel | NO  | NO  | NO  | NO  |
| SPAC27F1.02c  | SPCC18B5.11c  | 0.3163106 | Novel | NO  | NO  | NO  | NO  |
| SPAC13G6.12c  | SPAC6F6.08c   | 0.3163095 | Novel | NO  | NO  | NO  | YES |
| SPAC19G12.07c | SPAC23H3.04   | 0.3162852 | Novel | NO  | NO  | YES | NO  |
| SPAC23H3.04   | SPBC646.10c   | 0.3162493 | Novel | NO  | NO  | NO  | NO  |
| SPAC17H9.09c  | SPBC56F2.07c  | 0.3162468 | Novel | NO  | NO  | NO  | NO  |
| SPAC9G1.09    | SPBC17F3.02   | 0.3162319 | Novel | YES | YES | YES | NO  |
| SPAC23H3.04   | SPBC651.08c   | 0.3161832 | Novel | NO  | NO  | NO  | NO  |
| SPAC27F1.02c  | SPBC11B10.09  | 0.3161415 | Novel | NO  | NO  | NO  | YES |
| SPAC16.01     | SPBC1861.09   | 0.3160068 | Novel | NO  | NO  | NO  | NO  |
| SPAC22F3.02   | SPCC5E4.04    | 0.3160019 | Novel | NO  | NO  | NO  | YES |
| SPAC17G8.14c  | SPAC23H4.17c  | 0.3158174 | Novel | NO  | YES | YES | NO  |
| SPBC21B10.05c | SPAC13F5.02c  | 0.3157437 | Novel | NO  | NO  | NO  | NO  |
| SPBC1718.01   | SPAC29E6.01   | 0.3157166 | Novel | NO  | YES | NO  | NO  |
| SPAC1687.14c  | SPBC146.13c   | 0.3157163 | Novel | NO  | NO  | NO  | NO  |
| SPBC16H5.08c  | SPAC3G6.02    | 0.3155901 | Novel | YES | NO  | NO  | NO  |
| SPAC16.01     | SPBP16F5.04   | 0.3154809 | Novel | NO  | NO  | NO  | NO  |
| SPAC23H3.04   | SPAC16C9.07   | 0.3153328 | Novel | NO  | NO  | NO  | NO  |
| SPCC297.03    | SPAC23H4.17c  | 0.3153201 | Novel | NO  | YES | YES | NO  |
| SPAC17C9.13c  | SPCC24B10.07  | 0.3153161 | Novel | NO  | NO  | NO  | NO  |
| SPAC18B11.10  | SPCC18.05c    | 0.3152391 | Novel | YES | NO  | NO  | NO  |
| SPAC23C11.16  | SPBC1861.09   | 0.3152106 | Novel | NO  | YES | YES | NO  |
| SPAC13G6.12c  | SPCC1919.10c  | 0.3151549 | Novel | NO  | NO  | NO  | YES |
| SPBC1703.10   | SPAC16E8.09   | 0.3151537 | Novel | NO  | NO  | NO  | NO  |
| SPBC4F6.18c   | SPAC23H3.04   | 0.3151201 | Novel | YES | NO  | NO  | NO  |
| SPBC56F2.07c  | SPAC637.10c   | 0.3149469 | Novel | NO  | NO  | NO  | NO  |
| SPAC1B2.05    | SPAC14C4.13   | 0.3149431 | Novel | NO  | YES | NO  | YES |
| SPCC24B10.07  | SPCC622.09    | 0.3149363 | Novel | NO  | NO  | NO  | NO  |
| SPAC2F3.15    | SPAC23C4.19   | 0.3149273 | Novel | NO  | NO  | NO  | NO  |
| SPAC1952.07   | SPCC320.13c   | 0.3148203 | Novel | NO  | YES | NO  | NO  |



|               |               |           |       |     |     |     |     |
|---------------|---------------|-----------|-------|-----|-----|-----|-----|
| SPACUNK12.02c | SPBC30D10.04  | 0.3147758 | Novel | NO  | NO  | NO  | NO  |
| SPBC1105.04c  | SPAC1B2.05    | 0.3147676 | Novel | NO  | YES | YES | YES |
| SPBC24C6.06   | SPAC2C4.14c   | 0.3147585 | Novel | NO  | NO  | NO  | NO  |
| SPBC543.07    | SPACUNK12.02c | 0.3146986 | Novel | NO  | YES | YES | NO  |
| SPAC24B11.11c | SPAPB1A10.10c | 0.3146888 | Novel | NO  | NO  | NO  | NO  |
| SPCC24B10.07  | SPBC16H5.11c  | 0.3146674 | Novel | NO  | YES | NO  | NO  |
| SPAC24B11.11c | SPBC1861.09   | 0.3146527 | Novel | NO  | YES | YES | NO  |
| SPAC13G6.12c  | SPAC20G8.05c  | 0.314641  | Novel | NO  | NO  | NO  | YES |
| SPBC354.03    | SPBC19C2.05   | 0.3146102 | Novel | NO  | NO  | NO  | NO  |
| SPAC6B12.15   | SPCC18B5.11c  | 0.3145855 | Novel | NO  | YES | NO  | YES |
| SPAC13G6.12c  | SPAC24H6.05   | 0.3145643 | Novel | NO  | NO  | NO  | YES |
| SPBC12D12.04c | SPAC23H4.17c  | 0.3145382 | Novel | NO  | YES | YES | NO  |
| SPAC24B11.11c | SPAC9E9.07c   | 0.3144661 | Novel | NO  | NO  | NO  | NO  |
| SPBC543.07    | SPBC9B6.10    | 0.3144542 | Novel | YES | NO  | NO  | NO  |
| SPCC18B5.11c  | SPBC32C12.03c | 0.314435  | Novel | NO  | YES | YES | NO  |
| SPCC24B10.07  | SPAC6F12.15c  | 0.3143977 | Novel | NO  | YES | NO  | NO  |
| SPCC16C4.09   | SPCC4G3.08    | 0.3143159 | Novel | NO  | NO  | NO  | NO  |
| SPBC582.03    | SPAC23D3.09   | 0.3143048 | Novel | NO  | NO  | NO  | NO  |
| SPBC1289.11   | SPBC23E6.09   | 0.3142362 | Novel | YES | NO  | NO  | NO  |
| SPBC21C3.20c  | SPCC24B10.07  | 0.3141394 | Novel | NO  | NO  | NO  | NO  |
| SPCC1223.06   | SPCC320.13c   | 0.3141016 | Novel | NO  | YES | NO  | NO  |
| SPAC23H3.04   | SPAC644.16    | 0.3140847 | Novel | NO  | NO  | NO  | NO  |
| SPAC23A1.06c  | SPCC24B10.07  | 0.3140731 | Novel | NO  | YES | YES | NO  |
| SPAC1D4.13    | SPBC1703.10   | 0.3140492 | Novel | NO  | NO  | NO  | NO  |
| SPBC21.06c    | SPBC18H10.15  | 0.3140044 | Novel | NO  | YES | YES | NO  |
| SPCC16C4.11   | SPAC688.02c   | 0.3139999 | Novel | NO  | YES | NO  | NO  |
| SPAPB1A11.01  | SPAC23H3.04   | 0.3139471 | Novel | YES | NO  | NO  | NO  |
| SPAC22H10.04  | SPBC18H10.15  | 0.3139292 | Novel | NO  | NO  | YES | NO  |
| SPAPB15E9.01c | SPAC1F7.04    | 0.3139202 | Novel | NO  | NO  | NO  | NO  |
| SPBC336.04    | SPCC320.13c   | 0.3138807 | Novel | NO  | YES | NO  | NO  |
| SPAC23H3.04   | SPAC869.06c   | 0.3137735 | Novel | NO  | NO  | YES | NO  |
| SPAC1687.15   | SPAC11G7.02   | 0.3137134 | Novel | NO  | NO  | NO  | NO  |
| SPAC31G5.09c  | SPBC17F3.02   | 0.3137047 | Novel | NO  | YES | YES | NO  |
| SPBC660.14    | SPBC1604.14c  | 0.3136518 | Novel | NO  | YES | YES | YES |
| SPBC8D2.01    | SPAC644.06c   | 0.313637  | Novel | YES | YES | YES | NO  |
| SPAC56F8.16   | SPCC24B10.07  | 0.3136271 | Novel | NO  | NO  | YES | NO  |
| SPAC19G12.06c | SPACUNK12.02c | 0.3136019 | Novel | NO  | NO  | NO  | NO  |
| SPACUNK12.02c | SPCC622.08c   | 0.3135992 | Novel | NO  | NO  | NO  | NO  |
| SPCC31H12.05c | SPBC18H10.06c | 0.3135802 | Novel | NO  | NO  | NO  | NO  |
| SPAC6G9.08    | SPAC22F3.02   | 0.3135691 | Novel | NO  | NO  | NO  | YES |
| SPCC16C4.11   | SPAC20G8.05c  | 0.3135491 | Novel | NO  | YES | NO  | NO  |
| SPAC23H3.04   | SPAC1751.04   | 0.3135477 | Novel | NO  | NO  | YES | NO  |
| SPCC1223.06   | SPBC13E7.09   | 0.3134721 | Novel | YES | YES | NO  | NO  |
| SPCC736.14    | SPAC1B2.05    | 0.3134655 | Novel | YES | NO  | NO  | YES |
| SPACUNK12.02c | SPAC27E2.05   | 0.3134626 | Novel | NO  | NO  | NO  | NO  |
| SPBC354.03    | SPCC16C4.18c  | 0.3134544 | Novel | YES | NO  | YES | NO  |
| SPAC4D7.05    | SPBC56F2.07c  | 0.3133055 | Novel | NO  | NO  | NO  | NO  |

|               |               |           |       |     |     |     |     |
|---------------|---------------|-----------|-------|-----|-----|-----|-----|
| SPBC21.06c    | SPCC4G3.08    | 0.3132888 | Novel | NO  | YES | YES | NO  |
| SPAC823.05c   | SPAC23H3.04   | 0.3132529 | Novel | YES | NO  | NO  | NO  |
| SPCC16C4.11   | SPCC74.03c    | 0.3132488 | Novel | NO  | YES | YES | NO  |
| SPCC417.06c   | SPBC776.02c   | 0.3132231 | Novel | NO  | NO  | NO  | NO  |
| SPBC1685.15c  | SPAC664.10    | 0.31318   | Novel | YES | YES | NO  | NO  |
| SPAC17C9.13c  | SPBP4H10.04   | 0.3130919 | Novel | NO  | NO  | NO  | YES |
| SPAC1687.14c  | SPAC23H3.04   | 0.3130663 | Novel | NO  | NO  | NO  | NO  |
| SPAC2F3.15    | SPAC644.04    | 0.3130613 | Novel | NO  | NO  | NO  | NO  |
| SPBC1718.07c  | SPBC11B10.09  | 0.3130416 | Novel | NO  | YES | NO  | YES |
| SPAC31G5.09c  | SPAC1687.15   | 0.3129927 | Novel | NO  | YES | YES | NO  |
| SPAC23H3.04   | SPAC25G10.09c | 0.3128654 | Novel | NO  | NO  | NO  | NO  |
| SPCC188.02    | SPCC320.13c   | 0.3127363 | Novel | NO  | NO  | NO  | NO  |
| SPAC13G6.12c  | SPBC11C11.02  | 0.3127167 | Novel | NO  | NO  | NO  | YES |
| SPAC23D3.10c  | SPAC23C4.08   | 0.3127123 | Novel | NO  | NO  | NO  | NO  |
| SPAC31G5.09c  | SPBC1861.09   | 0.3127043 | Novel | NO  | YES | YES | NO  |
| SPBC1289.11   | SPBC29B5.01   | 0.3126427 | Novel | NO  | NO  | NO  | NO  |
| SPAC31G5.09c  | SPAC3C7.06c   | 0.3126114 | Novel | NO  | YES | YES | NO  |
| SPAC13G6.12c  | SPAC4A8.05c   | 0.3125996 | Novel | NO  | NO  | NO  | YES |
| SPAC9G1.02    | SPBC11B10.09  | 0.3125983 | Novel | NO  | YES | YES | YES |
| SPAC23H3.04   | SPBC887.06c   | 0.3125903 | Novel | NO  | NO  | NO  | NO  |
| SPAC57A7.08   | SPAC1F3.02c   | 0.3125551 | Novel | YES | NO  | YES | YES |
| SPCC18B5.11c  | SPAC1782.09c  | 0.3124393 | Novel | NO  | YES | NO  | YES |
| SPBC1861.09   | SPBC1604.14c  | 0.3124273 | Novel | NO  | YES | YES | NO  |
| SPAC9G1.09    | SPAC1687.15   | 0.3123738 | Novel | NO  | YES | YES | YES |
| SPCC188.09c   | SPAC23H3.04   | 0.3123704 | Novel | NO  | NO  | NO  | NO  |
| SPAC57A7.08   | SPCC1739.11c  | 0.3123153 | Novel | YES | NO  | NO  | NO  |
| SPAC13G6.12c  | SPCC645.05c   | 0.312314  | Novel | NO  | NO  | NO  | YES |
| SPBC32F12.09  | SPBC211.04c   | 0.3122913 | Novel | NO  | NO  | NO  | YES |
| SPAC22E12.14c | SPCC5E4.04    | 0.3122356 | Novel | NO  | NO  | NO  | YES |
| SPBC11B10.09  | SPBC1289.11   | 0.3121988 | Novel | NO  | NO  | NO  | NO  |
| SPAC24B11.06c | SPAC23H4.02   | 0.3121626 | Novel | YES | YES | YES | NO  |
| SPBC2F12.13   | SPBC1703.10   | 0.3121478 | Novel | NO  | NO  | NO  | NO  |
| SPBP8B7.16c   | SPAC23H3.04   | 0.3121118 | Novel | NO  | NO  | NO  | NO  |
| SPCC16C4.11   | SPBC216.07c   | 0.3121105 | Novel | NO  | YES | YES | NO  |
| SPAC18B11.10  | SPAC22F3.02   | 0.3121097 | Novel | NO  | NO  | YES | YES |
| SPAC4F10.13c  | SPAC11G7.02   | 0.3120236 | Novel | YES | NO  | NO  | NO  |
| SPAC1783.07c  | SPAC1687.15   | 0.3120004 | Novel | NO  | NO  | NO  | NO  |
| SPAC22F3.02   | SPAC630.14c   | 0.3119558 | Novel | NO  | NO  | NO  | YES |
| SPBC660.14    | SPCC1183.02   | 0.3119368 | Novel | NO  | NO  | NO  | NO  |
| SPAC1805.17   | SPAC1687.15   | 0.3119175 | Novel | NO  | NO  | NO  | NO  |
| SPAC637.07    | SPBC1703.10   | 0.3119149 | Novel | NO  | NO  | NO  | NO  |
| SPAC3A11.09   | SPBC16E9.11c  | 0.3118891 | Novel | NO  | NO  | NO  | NO  |
| SPBC32H8.10   | SPBP16F5.02   | 0.3118466 | Novel | NO  | YES | NO  | YES |
| SPCC895.07    | SPAC1B2.05    | 0.311824  | Novel | NO  | YES | NO  | YES |
| SPBC19C2.05   | SPAC644.06c   | 0.3118158 | Novel | YES | YES | YES | YES |
| SPAC16A10.04  | SPBC11B10.09  | 0.3118158 | Novel | NO  | NO  | NO  | NO  |
| SPCC24B10.07  | SPBP19A11.04c | 0.3117167 | Novel | NO  | YES | NO  | NO  |

|               |               |           |       |     |     |     |     |
|---------------|---------------|-----------|-------|-----|-----|-----|-----|
| SPBC56F2.07c  | SPBP19A11.03c | 0.3117103 | Novel | NO  | NO  | NO  | NO  |
| SPAC110.03    | SPBC1861.09   | 0.3116827 | Novel | NO  | NO  | NO  | NO  |
| SPAC24B11.06c | SPBC4F6.06    | 0.311659  | Novel | YES | YES | YES | NO  |
| SPBC3F6.01c   | SPBC26H8.10   | 0.3116474 | Novel | NO  | NO  | NO  | NO  |
| SPBC660.14    | SPAC24H6.05   | 0.3116377 | Novel | NO  | NO  | YES | YES |
| SPBC119.08    | SPAC1687.15   | 0.3116302 | Novel | NO  | YES | YES | NO  |
| SPAC1D4.13    | SPAC23C11.16  | 0.3116203 | Novel | NO  | YES | YES | NO  |
| SPAC13G6.12c  | SPAC926.03    | 0.311609  | Novel | NO  | NO  | NO  | YES |
| SPAC23C11.16  | SPAC17G8.14c  | 0.3115931 | Novel | NO  | YES | YES | NO  |
| SPAC22F3.02   | SPBC2D10.12   | 0.3115367 | Novel | NO  | NO  | NO  | YES |
| SPBC26H8.01   | SPAC11G7.02   | 0.3115103 | Novel | NO  | NO  | NO  | NO  |
| SPCC16C4.11   | SPBC20F10.06  | 0.3114797 | Novel | NO  | YES | NO  | NO  |
| SPCC1620.01c  | SPAC644.12    | 0.3114771 | Novel | YES | NO  | YES | NO  |
| SPCC16C4.09   | SPCC18B5.11c  | 0.3113571 | Novel | YES | NO  | NO  | YES |
| SPCC162.10    | SPAC6F6.08c   | 0.3113412 | Novel | NO  | NO  | NO  | NO  |
| SPAC22F3.02   | SPBC409.06    | 0.3112193 | Novel | NO  | NO  | NO  | YES |
| SPBC582.03    | SPCC74.03c    | 0.3111664 | Novel | NO  | NO  | NO  | NO  |
| SPAC13G6.12c  | SPAP8A3.08    | 0.3110753 | Novel | NO  | NO  | NO  | YES |
| SPCC330.10    | SPAC2F3.15    | 0.3110086 | Novel | NO  | NO  | NO  | NO  |
| SPAC24B11.06c | SPCC1919.01   | 0.3109905 | Novel | NO  | YES | YES | NO  |
| SPBC17F3.02   | SPAC2C4.14c   | 0.310963  | Novel | NO  | YES | YES | NO  |
| SPAC57A7.08   | SPMIT.09      | 0.310901  | Novel | NO  | NO  | NO  | NO  |
| SPAC1F7.04    | SPACUNK12.02c | 0.3108875 | Novel | NO  | NO  | NO  | NO  |
| SPAC1D4.13    | SPCC1739.11c  | 0.3108706 | Novel | NO  | YES | NO  | YES |
| SPAC22F3.02   | SPBC36.05c    | 0.3108672 | Novel | NO  | NO  | NO  | YES |
| SPBC11B10.09  | SPAC1952.07   | 0.3108671 | Novel | NO  | YES | YES | YES |
| SPAC22F3.02   | SPAC25G10.03  | 0.3107971 | Novel | NO  | YES | YES | YES |
| SPBC543.07    | SPBC215.02    | 0.3107881 | Novel | NO  | NO  | NO  | NO  |
| SPAC23H3.04   | SPBC1D7.01    | 0.3107687 | Novel | NO  | NO  | NO  | NO  |
| SPCC188.13c   | SPAC22F3.02   | 0.3107516 | Novel | NO  | NO  | NO  | YES |
| SPAC22F3.02   | SPCC736.11    | 0.310733  | Novel | NO  | NO  | NO  | YES |
| SPAC23H3.04   | SPCC2H8.05c   | 0.310689  | Novel | NO  | NO  | YES | NO  |
| SPBC36.05c    | SPBC32H8.12c  | 0.3106771 | Novel | NO  | NO  | YES | NO  |
| SPAC23D3.09   | SPAC4A8.15c   | 0.3106696 | Novel | NO  | NO  | NO  | NO  |
| SPAC1783.07c  | SPAC22F3.02   | 0.3106646 | Novel | NO  | YES | YES | YES |
| SPAC22F3.02   | SPBC16A3.18   | 0.3106492 | Novel | NO  | NO  | NO  | YES |
| SPBC9B6.10    | SPAC2F3.15    | 0.3106268 | Novel | NO  | NO  | NO  | NO  |
| SPAC24B11.06c | SPBC14F5.08   | 0.3106188 | Novel | NO  | NO  | NO  | NO  |
| SPBC11B10.09  | SPAC29E6.01   | 0.3106156 | Novel | NO  | YES | NO  | NO  |
| SPAC24H6.09   | SPCC24B10.07  | 0.3106143 | Novel | NO  | YES | YES | NO  |
| SPAC12G12.03  | SPAC22F3.02   | 0.3106114 | Novel | NO  | NO  | NO  | YES |
| SPAC24B11.06c | SPAC644.04    | 0.3105954 | Novel | NO  | YES | NO  | NO  |
| SPAC664.07c   | SPAC2C4.14c   | 0.3105634 | Novel | NO  | NO  | NO  | NO  |
| SPAC22F3.02   | SPAC1B1.01    | 0.3105493 | Novel | NO  | YES | YES | YES |
| SPCC16C4.11   | SPCC417.06c   | 0.3105349 | Novel | NO  | YES | YES | NO  |
| SPAC227.12    | SPBC409.05    | 0.3105109 | Novel | NO  | NO  | NO  | NO  |
| SPAC23H3.04   | SPCC576.13    | 0.3104935 | Novel | NO  | NO  | NO  | NO  |

|               |               |           |       |     |     |     |     |
|---------------|---------------|-----------|-------|-----|-----|-----|-----|
| SPBC4B4.05    | SPCC364.02c   | 0.3104865 | Novel | NO  | NO  | NO  | NO  |
| SPBC800.03    | SPAC22F3.02   | 0.3104003 | Novel | NO  | NO  | NO  | YES |
| SPAC17A2.09c  | SPAC1687.15   | 0.3103234 | Novel | NO  | NO  | NO  | NO  |
| SPCC1620.14c  | SPAC1250.01   | 0.310322  | Novel | YES | YES | NO  | NO  |
| SPAC1D4.13    | SPBC106.10    | 0.3103069 | Novel | NO  | YES | YES | NO  |
| SPBC32H8.10   | SPBC1604.14c  | 0.3102832 | Novel | NO  | YES | YES | NO  |
| SPBC21B10.05c | SPAC29E6.08   | 0.3102494 | Novel | NO  | NO  | NO  | NO  |
| SPAC23H3.04   | SPBC1734.15   | 0.310248  | Novel | NO  | NO  | NO  | NO  |
| SPAC22F3.02   | SPAC637.10c   | 0.3102444 | Novel | NO  | NO  | NO  | YES |
| SPBC18H10.15  | SPBC14F5.08   | 0.310237  | Novel | NO  | NO  | NO  | NO  |
| SPBC106.10    | SPAC1F5.08c   | 0.3102232 | Novel | NO  | NO  | NO  | NO  |
| SPAC977.10    | SPMIT.09      | 0.3101912 | Novel | YES | NO  | NO  | NO  |
| SPAC694.06c   | SPCC16A11.17  | 0.3101592 | Novel | NO  | YES | NO  | YES |
| SPBC16A3.05c  | SPBC16H5.08c  | 0.3101516 | Novel | NO  | NO  | NO  | NO  |
| SPCC18B5.03   | SPCC1183.02   | 0.3101335 | Novel | NO  | NO  | NO  | NO  |
| SPBC21.06c    | SPBC11C11.02  | 0.3100798 | Novel | NO  | YES | NO  | YES |
| SPBC4.04c     | SPAC1006.07   | 0.310063  | Novel | NO  | YES | NO  | NO  |
| SPAC23H3.04   | SPAPB1A10.06c | 0.3100605 | Novel | NO  | NO  | NO  | NO  |
| SPAC1B9.02c   | SPBP4H10.04   | 0.3100419 | Novel | NO  | NO  | NO  | NO  |
| SPBC11B10.09  | SPAC17A2.13c  | 0.3100404 | Novel | NO  | YES | YES | YES |
| SPAC17G6.16c  | SPAC644.16    | 0.3099269 | Novel | NO  | NO  | YES | NO  |
| SPBC16A3.15c  | SPAC1B2.05    | 0.3099144 | Novel | NO  | NO  | NO  | NO  |
| SPCC16A11.17  | SPBC409.05    | 0.3098276 | Novel | NO  | NO  | NO  | YES |
| SPAC821.12    | SPCC622.09    | 0.3096158 | Novel | NO  | NO  | NO  | NO  |
| SPAC23H3.04   | SPAC17G6.07c  | 0.3096096 | Novel | YES | NO  | NO  | NO  |
| SPAC29E6.01   | SPAC23H4.18c  | 0.3095949 | Novel | NO  | YES | YES | NO  |
| SPBC11B10.09  | SPBC30D10.10c | 0.3095933 | Novel | NO  | YES | NO  | NO  |
| SPACUNK12.02c | SPAC20H4.11c  | 0.3094972 | Novel | NO  | NO  | NO  | NO  |
| SPBC119.08    | SPBC4C3.12    | 0.3094686 | Novel | NO  | NO  | NO  | NO  |
| SPAC24B11.06c | SPAC27F1.02c  | 0.3094324 | Novel | YES | NO  | NO  | NO  |
| SPAC24B11.11c | SPAC17G8.14c  | 0.3094255 | Novel | NO  | YES | YES | YES |
| SPCC16C4.11   | SPAC222.10c   | 0.3093673 | Novel | NO  | YES | NO  | NO  |
| SPCC16C4.11   | SPBC1861.09   | 0.3093201 | Novel | NO  | YES | YES | NO  |
| SPBC543.07    | SPBC8D2.01    | 0.3092718 | Novel | YES | YES | YES | NO  |
| SPBC1D7.05    | SPBC1703.10   | 0.3092476 | Novel | NO  | NO  | NO  | NO  |
| SPAC110.03    | SPBC16E9.10c  | 0.309241  | Novel | NO  | NO  | NO  | NO  |
| SPAC23D3.09   | SPBC776.18c   | 0.3092059 | Novel | NO  | NO  | NO  | NO  |
| SPCC16C4.11   | SPAC222.15    | 0.3091918 | Novel | NO  | YES | NO  | NO  |
| SPBC1711.15c  | SPAC8C9.14    | 0.3091716 | Novel | NO  | NO  | NO  | NO  |
| SPAC644.06c   | SPBC32C12.03c | 0.3090955 | Novel | NO  | YES | YES | NO  |
| SPAC694.06c   | SPBC211.04c   | 0.3090802 | Novel | YES | YES | NO  | YES |
| SPAC1F7.04    | SPBC19C2.05   | 0.3090279 | Novel | NO  | YES | NO  | YES |
| SPBC409.07c   | SPBC1718.07c  | 0.3090221 | Novel | NO  | YES | NO  | YES |
| SPCC18B5.03   | SPBC1D7.05    | 0.3090053 | Novel | NO  | YES | NO  | YES |
| SPBC119.08    | SPAC4G8.05    | 0.3089852 | Novel | NO  | YES | YES | NO  |
| SPAC19B12.03  | SPBC18H10.15  | 0.3089758 | Novel | NO  | NO  | NO  | NO  |
| SPBC1604.14c  | SPBC17F3.02   | 0.3089469 | Novel | NO  | YES | YES | YES |

|               |              |           |       |     |     |     |     |
|---------------|--------------|-----------|-------|-----|-----|-----|-----|
| SPAC27E2.05   | SPAC23D3.09  | 0.3089365 | Novel | NO  | NO  | NO  | NO  |
| SPBC25D12.03c | SPAC23C4.18c | 0.3089324 | Novel | NO  | NO  | YES | YES |
| SPBC543.07    | SPAC1F5.09c  | 0.3089198 | Novel | NO  | YES | YES | YES |
| SPBC216.07c   | SPBC11B10.09 | 0.3089103 | Novel | NO  | YES | YES | YES |
| SPAC23H3.04   | SPAC27E2.11c | 0.3089071 | Novel | YES | NO  | YES | NO  |
| SPBC18H10.15  | SPCC4F11.02  | 0.3088519 | Novel | NO  | NO  | NO  | NO  |
| SPAC23H3.04   | SPAC22G7.05  | 0.308798  | Novel | NO  | NO  | NO  | NO  |
| SPAC4A8.05c   | SPAC23D3.09  | 0.3087959 | Novel | NO  | NO  | NO  | NO  |
| SPAC24B11.06c | SPCC162.10   | 0.3087869 | Novel | NO  | YES | YES | NO  |
| SPAC24H6.05   | SPBC2D10.20  | 0.308711  | Novel | NO  | NO  | NO  | NO  |
| SPCC297.03    | SPAC23D3.09  | 0.308668  | Novel | NO  | NO  | NO  | NO  |
| SPAC17G6.04c  | SPAC4C5.02c  | 0.3086308 | Novel | NO  | NO  | NO  | YES |
| SPAC22F3.09c  | SPAC644.16   | 0.3084857 | Novel | NO  | NO  | NO  | NO  |
| SPBC29A3.07c  | SPAC19A8.13  | 0.308482  | Novel | NO  | NO  | YES | NO  |
| SPAC24B11.06c | SPCC330.10   | 0.3084275 | Novel | NO  | NO  | NO  | NO  |
| SPCC24B10.07  | SPAC664.07c  | 0.3084253 | Novel | NO  | YES | NO  | NO  |
| SPBC776.12c   | SPBC19F8.07  | 0.3084016 | Novel | NO  | YES | YES | YES |
| SPAC1952.07   | SPCC1183.02  | 0.3083595 | Novel | NO  | NO  | NO  | NO  |
| SPBC21B10.05c | SPAC22H12.02 | 0.3083524 | Novel | NO  | YES | NO  | NO  |
| SPAPYUG7.02c  | SPAC1687.15  | 0.3082767 | Novel | NO  | NO  | NO  | NO  |
| SPCC162.10    | SPAC9G1.09   | 0.3082712 | Novel | NO  | YES | YES | NO  |
| SPAC23H3.04   | SPBC405.05   | 0.3082571 | Novel | NO  | NO  | NO  | NO  |
| SPBC428.13c   | SPAC2C4.14c  | 0.3082394 | Novel | YES | NO  | NO  | NO  |
| SPAC23H3.04   | SPAC30D11.03 | 0.3082222 | Novel | NO  | NO  | NO  | NO  |
| SPAC1687.15   | SPBC29B5.01  | 0.3082128 | Novel | NO  | NO  | NO  | NO  |
| SPAC824.04    | SPAC644.16   | 0.3082086 | Novel | NO  | NO  | YES | NO  |
| SPBC21C3.18   | SPBC11B10.09 | 0.3081944 | Novel | NO  | YES | YES | NO  |
| SPBC11G11.06c | SPAC644.12   | 0.3081926 | Novel | NO  | NO  | YES | YES |
| SPBC582.03    | SPAC1687.15  | 0.3081217 | Novel | NO  | NO  | NO  | NO  |
| SPAC16.01     | SPBC8D2.01   | 0.3081103 | Novel | NO  | NO  | NO  | NO  |
| SPAC23H3.04   | SPBC1778.10c | 0.3080923 | Novel | NO  | NO  | NO  | NO  |
| SPAC23H3.04   | SPAC25H1.06  | 0.3080229 | Novel | NO  | NO  | NO  | NO  |
| SPBC25D12.03c | SPAC8F11.07c | 0.3080199 | Novel | NO  | NO  | NO  | YES |
| SPBC12D12.04c | SPAC4G8.05   | 0.3079586 | Novel | NO  | YES | YES | NO  |
| SPBC1685.15c  | SPAC3A11.14c | 0.3079324 | Novel | NO  | YES | YES | YES |
| SPAC24B11.06c | SPCC1223.11  | 0.3078909 | Novel | NO  | NO  | YES | YES |
| SPBC32H8.10   | SPAC19E9.02  | 0.3078863 | Novel | NO  | YES | YES | NO  |
| SPBC18H10.15  | SPBC776.12c  | 0.3078529 | Novel | NO  | YES | YES | NO  |
| SPCC162.10    | SPCC1739.12  | 0.3077471 | Novel | NO  | NO  | NO  | NO  |
| SPAC821.12    | SPAC4G8.05   | 0.3077433 | Novel | NO  | YES | YES | NO  |
| SPCC18B5.11c  | SPCC4G3.08   | 0.3077049 | Novel | NO  | YES | YES | NO  |
| SPCC16C4.11   | SPAPB1E7.02c | 0.3076955 | Novel | NO  | YES | YES | NO  |
| SPAC16.01     | SPAC23H4.17c | 0.3076834 | Novel | NO  | NO  | NO  | NO  |
| SPAC23H3.04   | SPBC557.02c  | 0.3076736 | Novel | NO  | NO  | YES | NO  |
| SPAC1F7.04    | SPBC18H10.15 | 0.3076402 | Novel | NO  | NO  | NO  | NO  |
| SPAC589.02c   | SPBC19F8.07  | 0.3076207 | Novel | NO  | NO  | NO  | NO  |
| SPAC1420.02c  | SPAC23H3.04  | 0.307593  | Novel | NO  | NO  | NO  | NO  |

|               |               |           |       |     |     |     |     |
|---------------|---------------|-----------|-------|-----|-----|-----|-----|
| SPCC576.03c   | SPAC1687.15   | 0.3075836 | Novel | NO  | NO  | NO  | NO  |
| SPBC543.07    | SPCC4F11.02   | 0.3075723 | Novel | NO  | NO  | NO  | NO  |
| SPAC23C11.16  | SPAC1687.15   | 0.3074622 | Novel | NO  | YES | YES | NO  |
| SPAC823.15    | SPAC9E9.07c   | 0.307449  | Novel | NO  | NO  | NO  | NO  |
| SPAC9G1.09    | SPAC23C4.08   | 0.3074389 | Novel | NO  | YES | NO  | YES |
| SPCC18B5.11c  | SPAC29A4.16   | 0.3074088 | Novel | NO  | YES | YES | NO  |
| SPBC1921.03c  | SPBC16H5.08c  | 0.3074072 | Novel | NO  | NO  | NO  | NO  |
| SPAC22H10.04  | SPCC320.13c   | 0.3073743 | Novel | NO  | NO  | NO  | NO  |
| SPCC18B5.11c  | SPBC8D2.01    | 0.3073377 | Novel | NO  | YES | YES | NO  |
| SPAC23H3.04   | SPAC7D4.15c   | 0.3072331 | Novel | YES | NO  | NO  | NO  |
| SPAC9G1.09    | SPCC1223.06   | 0.3071965 | Novel | NO  | YES | YES | NO  |
| SPBC1711.15c  | SPAC806.08c   | 0.3071786 | Novel | NO  | NO  | NO  | NO  |
| SPCC970.04c   | SPCC320.13c   | 0.3071429 | Novel | NO  | YES | NO  | NO  |
| SPBC725.02    | SPBC1711.15c  | 0.3071349 | Novel | NO  | NO  | NO  | NO  |
| SPAC8E11.02c  | SPCC74.03c    | 0.3070948 | Novel | YES | NO  | NO  | NO  |
| SPBC713.05    | SPAC17G6.12   | 0.3070683 | Novel | NO  | NO  | NO  | NO  |
| SPAC977.10    | SPAC1687.15   | 0.307035  | Novel | NO  | NO  | NO  | NO  |
| SPBC3F6.01c   | SPAC6F12.12   | 0.3070296 | Novel | NO  | NO  | NO  | NO  |
| SPAC16.01     | SPACUNK12.02c | 0.3069271 | Novel | NO  | NO  | NO  | NO  |
| SPBC56F2.07c  | SPBC646.09c   | 0.3068333 | Novel | NO  | NO  | NO  | NO  |
| SPAC4D7.03    | SPAC630.14c   | 0.3067674 | Novel | NO  | YES | NO  | NO  |
| SPCC320.13c   | SPAC1006.08   | 0.3067556 | Novel | NO  | NO  | NO  | NO  |
| SPBC8D2.01    | SPBC1604.14c  | 0.3067422 | Novel | NO  | YES | YES | NO  |
| SPAC23H3.04   | SPAC31A2.09c  | 0.3067147 | Novel | NO  | NO  | NO  | NO  |
| SPAC1687.15   | SPAC1F5.09c   | 0.3066266 | Novel | NO  | YES | YES | NO  |
| SPCC5E4.10c   | SPAC23H3.04   | 0.3066254 | Novel | NO  | NO  | YES | NO  |
| SPBC23E6.01c  | SPAC31G5.09c  | 0.3066104 | Novel | NO  | NO  | NO  | NO  |
| SPAC11E3.03   | SPAC23H3.04   | 0.3066098 | Novel | NO  | NO  | NO  | NO  |
| SPBC2F12.09c  | SPAC1687.15   | 0.3065314 | Novel | NO  | NO  | NO  | NO  |
| SPAC57A7.08   | SPAC1565.06c  | 0.3064967 | Novel | NO  | NO  | NO  | NO  |
| SPBC11B10.09  | SPBC244.01c   | 0.3064793 | Novel | NO  | YES | NO  | YES |
| SPAC23H3.04   | SPBC365.11    | 0.3064596 | Novel | NO  | NO  | NO  | NO  |
| SPAC19D5.01   | SPBC8D2.01    | 0.3064183 | Novel | YES | NO  | NO  | NO  |
| SPAC16A10.04  | SPAC27E2.11c  | 0.306364  | Novel | NO  | NO  | NO  | NO  |
| SPAC24B11.06c | SPBC30B4.01c  | 0.3063338 | Novel | NO  | NO  | NO  | NO  |
| SPAC2F7.03c   | SPAC23D3.09   | 0.306296  | Novel | NO  | NO  | NO  | NO  |
| SPAC27E2.11c  | SPAC14C4.09   | 0.3062923 | Novel | YES | NO  | NO  | NO  |
| SPCC16C4.11   | SPBC21C3.18   | 0.3062381 | Novel | NO  | YES | YES | NO  |
| SPBC1D7.05    | SPBC17F3.02   | 0.3062278 | Novel | YES | YES | YES | NO  |
| SPAC23H3.04   | SPAC22A12.14c | 0.3062068 | Novel | NO  | NO  | YES | NO  |
| SPBC32F12.09  | SPCC18.05c    | 0.3062024 | Novel | NO  | NO  | NO  | NO  |
| SPBC13E7.09   | SPAC20H4.11c  | 0.3061726 | Novel | YES | NO  | NO  | NO  |
| SPAC18B11.10  | SPBC543.07    | 0.3061706 | Novel | NO  | NO  | NO  | NO  |
| SPBC21B10.05c | SPCC1259.15c  | 0.3061643 | Novel | NO  | NO  | YES | NO  |
| SPAC823.08c   | SPBC11B10.09  | 0.3061183 | Novel | NO  | YES | NO  | NO  |
| SPAC24H6.05   | SPBC215.13    | 0.3061096 | Novel | NO  | NO  | NO  | NO  |
| SPBC582.03    | SPBC8D2.01    | 0.3061048 | Novel | NO  | NO  | NO  | NO  |

|               |               |           |       |     |     |     |     |
|---------------|---------------|-----------|-------|-----|-----|-----|-----|
| SPAC23H3.04   | SPCC663.05c   | 0.3060991 | Novel | NO  | NO  | NO  | NO  |
| SPBC21B10.05c | SPAC6F12.15c  | 0.3060362 | Novel | NO  | YES | NO  | YES |
| SPBC56F2.07c  | SPBC409.06    | 0.3059913 | Novel | NO  | NO  | NO  | NO  |
| SPAC821.12    | SPBC16H5.07c  | 0.3059553 | Novel | NO  | NO  | YES | NO  |
| SPBC409.05    | SPCC320.13c   | 0.3059398 | Novel | NO  | YES | NO  | NO  |
| SPAC6F12.03c  | SPAC23H3.04   | 0.3059178 | Novel | NO  | NO  | NO  | NO  |
| SPBC713.05    | SPBC11B10.09  | 0.3058848 | Novel | NO  | NO  | NO  | NO  |
| SPAC821.12    | SPAC823.15    | 0.3058697 | Novel | NO  | NO  | YES | NO  |
| SPAC15A10.08  | SPAC23D3.09   | 0.3058378 | Novel | NO  | NO  | NO  | NO  |
| SPAC23D3.09   | SPAC1F5.04c   | 0.3058295 | Novel | NO  | NO  | NO  | NO  |
| SPBC543.07    | SPAC1687.15   | 0.305825  | Novel | NO  | YES | YES | NO  |
| SPBC12D12.04c | SPAC9E9.07c   | 0.3057848 | Novel | NO  | NO  | NO  | NO  |
| SPBC26H8.05c  | SPCC320.13c   | 0.3057606 | Novel | NO  | NO  | NO  | NO  |
| SPAC110.03    | SPACUNK12.02c | 0.3057547 | Novel | NO  | NO  | NO  | NO  |
| SPBC543.07    | SPBC1A4.02c   | 0.3057198 | Novel | NO  | NO  | NO  | NO  |
| SPBC21B10.05c | SPAC2G11.14   | 0.3057078 | Novel | NO  | YES | NO  | NO  |
| SPCC5E4.04    | SPAC23H4.17c  | 0.3056954 | Novel | NO  | NO  | NO  | NO  |
| SPBC29B5.01   | SPAC11G7.04   | 0.3056371 | Novel | NO  | NO  | NO  | YES |
| SPAC1805.12c  | SPBC29B5.01   | 0.3056371 | Novel | NO  | NO  | NO  | YES |
| SPBC24C6.07   | SPCC24B10.07  | 0.3056273 | Novel | NO  | YES | NO  | NO  |
| SPAC23H3.04   | SPAC17A2.12   | 0.3056268 | Novel | NO  | NO  | NO  | NO  |
| SPAC31G5.09c  | SPBC776.12c   | 0.3056239 | Novel | NO  | YES | YES | NO  |
| SPAC23H3.04   | SPBP16F5.05c  | 0.3056058 | Novel | NO  | NO  | NO  | NO  |
| SPBC543.07    | SPAC630.14c   | 0.3056017 | Novel | YES | NO  | NO  | NO  |
| SPAC1420.03   | SPBC56F2.07c  | 0.3055887 | Novel | NO  | NO  | NO  | NO  |
| SPBC56F2.07c  | SPAPB8E5.02c  | 0.3055887 | Novel | NO  | NO  | NO  | NO  |
| SPAC17G8.14c  | SPBC1861.09   | 0.3055469 | Novel | NO  | YES | YES | NO  |
| SPAC23H3.04   | SPCC1183.02   | 0.3054726 | Novel | NO  | NO  | NO  | NO  |
| SPAC22E12.14c | SPAC23A1.06c  | 0.3054079 | Novel | NO  | YES | YES | NO  |
| SPAC9G1.09    | SPBC8D2.01    | 0.3053831 | Novel | NO  | YES | YES | NO  |
| SPBC1685.08   | SPAC23H3.04   | 0.3053473 | Novel | NO  | NO  | NO  | NO  |
| SPBC8D2.01    | SPAC1F3.02c   | 0.3053456 | Novel | YES | YES | YES | NO  |
| SPBC8D2.01    | SPAC26F1.10c  | 0.3053137 | Novel | NO  | NO  | NO  | NO  |
| SPAC1952.07   | SPAC14C4.03   | 0.305311  | Novel | NO  | NO  | NO  | NO  |
| SPBC56F2.07c  | SPAC6G9.08    | 0.3052837 | Novel | NO  | NO  | NO  | NO  |
| SPBC25D12.03c | SPBC409.05    | 0.3052499 | Novel | NO  | NO  | NO  | YES |
| SPAC630.14c   | SPBC1289.11   | 0.3052465 | Novel | YES | NO  | NO  | NO  |
| SPACUNK12.02c | SPAC821.04c   | 0.3052127 | Novel | NO  | YES | NO  | NO  |
| SPBC11B10.09  | SPBC216.05    | 0.3052068 | Novel | NO  | YES | NO  | YES |
| SPAC27F1.02c  | SPAC23D3.09   | 0.3051643 | Novel | NO  | NO  | NO  | NO  |
| SPBC1861.09   | SPAC23C4.08   | 0.3051473 | Novel | NO  | NO  | NO  | NO  |
| SPBC19C2.05   | SPCC320.13c   | 0.3051222 | Novel | NO  | YES | NO  | NO  |
| SPACUNK12.02c | SPAC6F6.08c   | 0.3050859 | Novel | NO  | NO  | NO  | NO  |
| SPBC649.05    | SPAC2F3.15    | 0.3050822 | Novel | NO  | NO  | NO  | YES |
| SPAC23H3.04   | SPBC1198.09   | 0.3050704 | Novel | NO  | NO  | NO  | NO  |
| SPAC24B11.11c | SPAC1F3.02c   | 0.3050233 | Novel | NO  | YES | YES | YES |
| SPBC336.12c   | SPAC23D3.09   | 0.304943  | Novel | NO  | NO  | NO  | NO  |

|               |               |           |       |     |     |     |     |
|---------------|---------------|-----------|-------|-----|-----|-----|-----|
| SPAC23H3.04   | SPCC1620.01c  | 0.3049428 | Novel | NO  | NO  | NO  | NO  |
| SPBC13E7.09   | SPBC1706.01   | 0.304928  | Novel | NO  | YES | NO  | NO  |
| SPAC589.02c   | SPBC18H10.15  | 0.3048806 | Novel | NO  | NO  | NO  | NO  |
| SPAC821.12    | SPAC2F3.15    | 0.3048626 | Novel | NO  | YES | NO  | NO  |
| SPCC24B10.07  | SPAC328.03    | 0.3048509 | Novel | NO  | YES | NO  | NO  |
| SPCC417.06c   | SPBC11B10.09  | 0.3048219 | Novel | NO  | YES | YES | NO  |
| SPBC543.07    | SPBC215.05    | 0.3048196 | Novel | YES | NO  | NO  | NO  |
| SPBC23G7.12c  | SPAC9E9.07c   | 0.3047882 | Novel | NO  | NO  | NO  | NO  |
| SPCC16C4.07   | SPBC11B10.09  | 0.3047732 | Novel | NO  | NO  | NO  | YES |
| SPCC645.05c   | SPCC320.13c   | 0.3047603 | Novel | NO  | YES | NO  | NO  |
| SPCC16C4.11   | SPAC1006.08   | 0.3047428 | Novel | NO  | NO  | NO  | NO  |
| SPAC23H3.04   | SPBC11B10.03  | 0.3047188 | Novel | NO  | NO  | NO  | NO  |
| SPCC576.15c   | SPBC543.07    | 0.30471   | Novel | YES | YES | YES | YES |
| SPCC297.03    | SPBC18H10.15  | 0.3046889 | Novel | NO  | YES | YES | NO  |
| SPAC22E12.14c | SPBC1861.09   | 0.3045529 | Novel | NO  | YES | YES | NO  |
| SPCC576.15c   | SPAC31G5.09c  | 0.3045252 | Novel | NO  | YES | YES | NO  |
| SPBC1289.11   | SPAC644.04    | 0.3045062 | Novel | NO  | NO  | NO  | NO  |
| SPAC1F7.02c   | SPAC23H3.04   | 0.3044936 | Novel | NO  | NO  | NO  | NO  |
| SPCC16C4.07   | SPCC320.13c   | 0.3044555 | Novel | NO  | NO  | NO  | NO  |
| SPBC405.06    | SPAC22H12.02  | 0.3044313 | Novel | NO  | NO  | NO  | NO  |
| SPCC830.06    | SPCC1919.10c  | 0.304286  | Novel | NO  | NO  | NO  | NO  |
| SPAC20H4.11c  | SPCC895.07    | 0.304273  | Novel | NO  | NO  | NO  | NO  |
| SPBC3B8.02    | SPBC1289.11   | 0.3042654 | Novel | NO  | NO  | NO  | NO  |
| SPCC24B10.07  | SPAC6G10.12c  | 0.3042448 | Novel | NO  | NO  | NO  | NO  |
| SPAC4F10.15c  | SPBC11B10.09  | 0.3042193 | Novel | NO  | YES | NO  | NO  |
| SPCC24B10.07  | SPAP27G11.10c | 0.3042059 | Novel | NO  | NO  | NO  | NO  |
| SPAC23D3.09   | SPBC1778.06c  | 0.304169  | Novel | NO  | NO  | NO  | NO  |
| SPBC32F12.04  | SPAC11E3.04c  | 0.304141  | Novel | NO  | NO  | NO  | NO  |
| SPAC24B11.11c | SPCC162.10    | 0.3040859 | Novel | NO  | YES | YES | NO  |
| SPBC32H8.10   | SPBC8D2.01    | 0.3040413 | Novel | NO  | YES | YES | NO  |
| SPBC119.08    | SPBC17F3.02   | 0.3040114 | Novel | YES | YES | YES | NO  |
| SPBC16A3.15c  | SPAC23D3.09   | 0.3039912 | Novel | NO  | NO  | NO  | NO  |
| SPAC24B11.06c | SPBC1198.12   | 0.3039123 | Novel | NO  | YES | NO  | NO  |
| SPBC6B1.07    | SPAC1006.07   | 0.3039102 | Novel | NO  | NO  | NO  | NO  |
| SPBC1289.11   | SPAC8C9.03    | 0.3039088 | Novel | NO  | NO  | NO  | NO  |
| SPAC24H6.05   | SPCC777.10c   | 0.3038852 | Novel | NO  | NO  | NO  | NO  |
| SPAC4F10.15c  | SPBC6B1.07    | 0.3038667 | Novel | NO  | NO  | NO  | NO  |
| SPBC2D10.11c  | SPAC23H3.04   | 0.3038474 | Novel | NO  | NO  | NO  | NO  |
| SPAC24B11.11c | SPBC19C7.03   | 0.3038373 | Novel | NO  | YES | NO  | YES |
| SPBC19C2.05   | SPBC1703.10   | 0.3038297 | Novel | NO  | NO  | NO  | NO  |
| SPAC1D4.06c   | SPCC18B5.11c  | 0.3037759 | Novel | NO  | YES | YES | YES |
| SPAC4F8.10c   | SPAC23D3.09   | 0.3037752 | Novel | NO  | NO  | NO  | NO  |
| SPACUNK4.06c  | SPAC23D3.09   | 0.3037546 | Novel | NO  | NO  | NO  | NO  |
| SPBC21B10.05c | SPCC16C4.18c  | 0.3037226 | Novel | NO  | YES | NO  | NO  |
| SPCC18B5.11c  | SPAC20H4.11c  | 0.303667  | Novel | YES | NO  | NO  | NO  |
| SPCC16C4.11   | SPCC162.10    | 0.3036557 | Novel | NO  | YES | YES | NO  |
| SPCC16C4.11   | SPBC17D1.06   | 0.3036357 | Novel | NO  | YES | NO  | NO  |



|               |               |           |       |     |     |     |     |
|---------------|---------------|-----------|-------|-----|-----|-----|-----|
| SPBC582.03    | SPCC777.10c   | 0.3036334 | Novel | NO  | NO  | NO  | NO  |
| SPAP8A3.08    | SPAC23D3.09   | 0.3036177 | Novel | NO  | NO  | NO  | NO  |
| SPAC23C11.16  | SPBC17F3.02   | 0.303496  | Novel | YES | YES | YES | YES |
| SPBC1A4.02c   | SPBC18H10.15  | 0.3034451 | Novel | NO  | NO  | NO  | NO  |
| SPAC1805.12c  | SPBP19A11.03c | 0.3034256 | Novel | NO  | NO  | NO  | YES |
| SPBP19A11.03c | SPAC11G7.04   | 0.3034256 | Novel | NO  | NO  | NO  | YES |
| SPAC1F7.04    | SPBC2D10.20   | 0.3034167 | Novel | NO  | NO  | NO  | NO  |
| SPCC18B5.11c  | SPBC244.01c   | 0.3034021 | Novel | NO  | YES | NO  | NO  |
| SPAC1F7.04    | SPBC1105.09   | 0.3033895 | Novel | NO  | NO  | NO  | NO  |
| SPAC56F8.16   | SPAC821.12    | 0.3033277 | Novel | NO  | NO  | NO  | NO  |
| SPBC19C2.05   | SPBC18H10.15  | 0.3033248 | Novel | NO  | YES | YES | NO  |
| SPBC13E7.09   | SPAC15A10.16  | 0.3032968 | Novel | NO  | YES | NO  | NO  |
| SPAC22E12.14c | SPCC1739.12   | 0.3032366 | Novel | NO  | NO  | NO  | NO  |
| SPCC1259.13   | SPCC74.03c    | 0.3032192 | Novel | YES | YES | YES | NO  |
| SPBC11B10.09  | SPBC530.14c   | 0.3031518 | Novel | NO  | YES | YES | NO  |
| SPAC821.12    | SPAC6F12.15c  | 0.3030539 | Novel | NO  | YES | NO  | NO  |
| SPCC16C4.09   | SPBC3F6.01c   | 0.3028666 | Novel | YES | NO  | NO  | NO  |
| SPBC23G7.07c  | SPAC23H3.04   | 0.3028578 | Novel | NO  | NO  | NO  | NO  |
| SPBC1718.07c  | SPCC24B10.07  | 0.3028552 | Novel | NO  | YES | NO  | NO  |
| SPAC24H6.09   | SPCC4G3.08    | 0.3027986 | Novel | NO  | NO  | NO  | NO  |
| SPAC24B11.06c | SPBC30D10.10c | 0.3027922 | Novel | YES | YES | YES | YES |
| SPAC1B9.02c   | SPAC16.01     | 0.3027902 | Novel | NO  | NO  | NO  | NO  |
| SPAC1B9.02c   | SPAC1F7.04    | 0.3027823 | Novel | NO  | NO  | NO  | NO  |
| SPAC23H3.04   | SPBC20F10.09  | 0.3027649 | Novel | NO  | NO  | NO  | NO  |
| SPAC630.14c   | SPBC18H10.06c | 0.3027039 | Novel | YES | NO  | NO  | NO  |
| SPAC23H3.04   | SPAC227.05    | 0.3026981 | Novel | NO  | NO  | NO  | NO  |
| SPAC24B11.06c | SPCC74.03c    | 0.3026767 | Novel | YES | YES | YES | NO  |
| SPBC4.07c     | SPCC5E4.04    | 0.3026631 | Novel | NO  | YES | NO  | NO  |
| SPAC23H3.04   | SPAPB18E9.02c | 0.3026594 | Novel | NO  | NO  | NO  | NO  |
| SPBC29A10.15  | SPCC320.13c   | 0.3026327 | Novel | NO  | YES | NO  | NO  |
| SPAC24B11.06c | SPBC21C3.18   | 0.3026312 | Novel | YES | YES | YES | NO  |
| SPCC576.15c   | SPCC1259.13   | 0.3025966 | Novel | YES | YES | YES | NO  |
| SPBC11B10.09  | SPBC25D12.03c | 0.3025563 | Novel | NO  | YES | NO  | YES |
| SPAC1D4.13    | SPCC24B10.07  | 0.3025262 | Novel | NO  | YES | YES | NO  |
| SPBC18H10.15  | SPCC1840.02c  | 0.3025074 | Novel | NO  | NO  | NO  | NO  |
| SPBC32H8.10   | SPCC663.05c   | 0.3024691 | Novel | NO  | YES | NO  | NO  |
| SPCC320.13c   | SPBC15D4.03   | 0.3024006 | Novel | NO  | YES | NO  | NO  |
| SPBC18H10.15  | SPAC20H4.11c  | 0.3022493 | Novel | NO  | NO  | NO  | NO  |
| SPBC24C6.07   | SPBC119.08    | 0.3022355 | Novel | NO  | YES | NO  | YES |
| SPAC1805.12c  | SPAC637.10c   | 0.3022199 | Novel | NO  | NO  | NO  | YES |
| SPAC637.10c   | SPAC11G7.04   | 0.3022199 | Novel | NO  | NO  | NO  | YES |
| SPCC18B5.03   | SPAC23C11.11  | 0.3020696 | Novel | NO  | YES | NO  | YES |
| SPAC22E12.14c | SPBC21.06c    | 0.3019446 | Novel | NO  | YES | YES | NO  |
| SPAC630.03    | SPCC645.05c   | 0.3018365 | Novel | NO  | YES | YES | NO  |
| SPAC24H6.05   | SPAC1006.07   | 0.3017642 | Novel | NO  | NO  | NO  | NO  |
| SPAC25G10.03  | SPAC29E6.01   | 0.3017622 | Novel | NO  | YES | NO  | NO  |
| SPAC4A8.05c   | SPAC57A7.08   | 0.3016603 | Novel | NO  | NO  | NO  | NO  |

|               |              |           |       |     |     |     |     |
|---------------|--------------|-----------|-------|-----|-----|-----|-----|
| SPCC830.06    | SPBC146.13c  | 0.3016425 | Novel | YES | NO  | NO  | NO  |
| SPCC417.06c   | SPCC1739.12  | 0.3015951 | Novel | NO  | NO  | NO  | NO  |
| SPBC8D2.01    | SPBC119.08   | 0.3015642 | Novel | YES | YES | YES | NO  |
| SPBC11B10.09  | SPAC17A5.11  | 0.3015404 | Novel | NO  | YES | NO  | YES |
| SPAC57A10.02  | SPAC8E11.02c | 0.3015293 | Novel | NO  | YES | NO  | YES |
| SPCC188.02    | SPCC24B10.07 | 0.3014814 | Novel | NO  | NO  | NO  | NO  |
| SPAC821.12    | SPBC18H10.15 | 0.3014307 | Novel | NO  | YES | YES | NO  |
| SPCC16C4.11   | SPAC664.07c  | 0.3013253 | Novel | NO  | YES | NO  | NO  |
| SPBC21.06c    | SPCC162.10   | 0.301268  | Novel | NO  | YES | YES | NO  |
| SPAC1834.03c  | SPBC32H8.12c | 0.3012306 | Novel | NO  | NO  | NO  | NO  |
| SPBC1105.12   | SPBC32H8.12c | 0.3012306 | Novel | NO  | NO  | NO  | NO  |
| SPBC8D2.03c   | SPBC32H8.12c | 0.3012306 | Novel | NO  | NO  | NO  | NO  |
| SPBC11B10.09  | SPBC4.04c    | 0.3012268 | Novel | NO  | YES | NO  | YES |
| SPBC1289.11   | SPAC6F12.15c | 0.3011725 | Novel | NO  | NO  | NO  | NO  |
| SPAC1B9.02c   | SPBC1778.10c | 0.3011625 | Novel | NO  | YES | YES | NO  |
| SPAC16.01     | SPBC13E7.09  | 0.301124  | Novel | YES | YES | NO  | NO  |
| SPAC1F7.04    | SPAC4G8.05   | 0.3011159 | Novel | NO  | NO  | NO  | NO  |
| SPBC26H8.05c  | SPBC18H10.15 | 0.3010883 | Novel | NO  | NO  | YES | NO  |
| SPBC8D2.01    | SPAC11G7.02  | 0.301057  | Novel | YES | NO  | NO  | NO  |
| SPCC330.01c   | SPAC23H3.04  | 0.3010404 | Novel | NO  | NO  | NO  | NO  |
| SPBC119.08    | SPCC1739.11c | 0.3009858 | Novel | YES | YES | YES | YES |
| SPCC970.04c   | SPCC4G3.08   | 0.3007834 | Novel | NO  | NO  | YES | NO  |
| SPAC823.08c   | SPCC16A11.17 | 0.3007752 | Novel | NO  | YES | NO  | NO  |
| SPAC644.06c   | SPAC23H4.02  | 0.3006908 | Novel | YES | YES | YES | NO  |
| SPBC409.09c   | SPBC11B10.09 | 0.3006498 | Novel | NO  | YES | NO  | NO  |
| SPAC23H3.04   | SPAC1B3.05   | 0.3006083 | Novel | NO  | NO  | NO  | NO  |
| SPBC28F2.03   | SPAC644.12   | 0.3005761 | Novel | NO  | NO  | NO  | YES |
| SPBC8D2.01    | SPAC1782.09c | 0.3005237 | Novel | YES | NO  | NO  | NO  |
| SPBC6B1.07    | SPBC4B4.07c  | 0.3004559 | Novel | NO  | NO  | YES | NO  |
| SPBC354.03    | SPBC11B10.09 | 0.3004344 | Novel | NO  | NO  | NO  | NO  |
| SPAC1B9.02c   | SPCC162.10   | 0.3002829 | Novel | NO  | YES | YES | NO  |
| SPBP8B7.02    | SPAC23H3.04  | 0.3002714 | Novel | NO  | NO  | YES | NO  |
| SPBC2D10.14c  | SPAC926.03   | 0.3002713 | Novel | YES | NO  | YES | NO  |
| SPAC17G8.14c  | SPAC9E9.07c  | 0.300207  | Novel | NO  | NO  | NO  | NO  |
| SPBC17F3.02   | SPAC1F5.09c  | 0.3002051 | Novel | NO  | YES | YES | NO  |
| SPAC18B11.10  | SPBC11B10.09 | 0.3001753 | Novel | NO  | YES | NO  | NO  |
| SPCC417.06c   | SPBC106.10   | 0.3001727 | Novel | NO  | YES | YES | NO  |
| SPBC12D12.04c | SPBC1861.09  | 0.3001688 | Novel | NO  | YES | YES | NO  |
| SPAC1D4.13    | SPAC23C11.11 | 0.3001503 | Novel | NO  | YES | YES | NO  |
| SPAC821.12    | SPCC5E4.04   | 0.3000811 | Novel | NO  | YES | NO  | NO  |
| SPAC110.03    | SPAC4G8.05   | 0.3000602 | Novel | NO  | NO  | NO  | NO  |
| SPCC31H12.05c | SPAC9E9.07c  | 0.3000018 | Novel | NO  | NO  | NO  | NO  |
| SPAC1B9.02c   | SPBC1861.09  | 0.2999834 | Novel | NO  | YES | YES | NO  |
| SPBC146.13c   | SPBC11C11.02 | 0.2999751 | Novel | YES | YES | NO  | YES |
| SPCC4G3.08    | SPCC1739.11c | 0.2999332 | Novel | NO  | NO  | NO  | NO  |
| SPAC23H3.04   | SPCC1739.07  | 0.2999215 | Novel | NO  | NO  | NO  | NO  |
| SPAC23H3.04   | SPBC16H5.03c | 0.2999191 | Novel | NO  | NO  | NO  | NO  |

|               |               |           |       |     |     |     |     |
|---------------|---------------|-----------|-------|-----|-----|-----|-----|
| SPCC16C4.11   | SPBC409.09c   | 0.2998921 | Novel | NO  | YES | NO  | NO  |
| SPCC576.15c   | SPAC2C4.14c   | 0.2998827 | Novel | NO  | YES | YES | NO  |
| SPBC12D12.04c | SPAC23C11.16  | 0.299871  | Novel | NO  | YES | YES | NO  |
| SPBC2F12.13   | SPAC664.10    | 0.299828  | Novel | YES | YES | NO  | NO  |
| SPCC417.06c   | SPBC16H5.07c  | 0.2998118 | Novel | NO  | NO  | YES | NO  |
| SPAC6B12.15   | SPAC23E2.01   | 0.2997916 | Novel | NO  | YES | NO  | NO  |
| SPAC23C11.16  | SPAC4G8.05    | 0.2997786 | Novel | NO  | YES | YES | NO  |
| SPAC31G5.09c  | SPBC8D2.01    | 0.2996885 | Novel | NO  | YES | YES | NO  |
| SPAC1F7.04    | SPAC30D11.13  | 0.2996753 | Novel | NO  | YES | NO  | NO  |
| SPBC543.07    | SPAC1751.01c  | 0.2996094 | Novel | NO  | NO  | NO  | NO  |
| SPAC17A2.09c  | SPBC8D2.01    | 0.2995998 | Novel | YES | NO  | NO  | NO  |
| SPBC12D12.08c | SPAC6F12.15c  | 0.2995997 | Novel | NO  | YES | NO  | NO  |
| SPACUNK12.02c | SPAC17H9.19c  | 0.2995982 | Novel | NO  | NO  | NO  | NO  |
| SPAC30.04c    | SPAC9E9.12c   | 0.2995763 | Novel | YES | YES | NO  | NO  |
| SPAC16.01     | SPAC4G8.05    | 0.2995647 | Novel | NO  | NO  | NO  | NO  |
| SPBC30B4.01c  | SPBC106.10    | 0.2995629 | Novel | NO  | NO  | NO  | NO  |
| SPBC8D2.01    | SPAC1805.17   | 0.2995451 | Novel | NO  | NO  | NO  | NO  |
| SPBC713.09    | SPAC23H3.04   | 0.2995395 | Novel | NO  | NO  | YES | NO  |
| SPAC1B9.02c   | SPAC20H4.11c  | 0.2994198 | Novel | NO  | NO  | NO  | NO  |
| SPCC576.15c   | SPAC23C11.16  | 0.2992651 | Novel | YES | YES | YES | NO  |
| SPAC24H6.05   | SPBC1D7.05    | 0.2991822 | Novel | YES | YES | NO  | YES |
| SPAC1687.15   | SPAC821.08c   | 0.2991738 | Novel | NO  | NO  | NO  | NO  |
| SPBC19G7.05c  | SPAC2F3.15    | 0.2991024 | Novel | NO  | NO  | NO  | YES |
| SPCC576.10c   | SPAC16A10.04  | 0.2990452 | Novel | NO  | NO  | NO  | NO  |
| SPAC57A7.08   | SPBC428.13c   | 0.2990416 | Novel | NO  | NO  | NO  | NO  |
| SPBC1711.11   | SPAC23H3.04   | 0.2990144 | Novel | NO  | NO  | NO  | NO  |
| SPBC582.03    | SPBC32C12.03c | 0.2989864 | Novel | NO  | NO  | NO  | NO  |
| SPAC110.03    | SPAC1B9.02c   | 0.2989387 | Novel | NO  | NO  | NO  | NO  |
| SPAC16A10.07c | SPAC14C4.03   | 0.2989386 | Novel | NO  | NO  | NO  | NO  |
| SPAC1805.15c  | SPBC119.08    | 0.2989009 | Novel | YES | NO  | NO  | NO  |
| SPAC1D4.11c   | SPBC11B10.09  | 0.2988882 | Novel | NO  | YES | YES | NO  |
| SPBC428.13c   | SPBC1861.09   | 0.2988837 | Novel | NO  | NO  | NO  | NO  |
| SPCC16C4.11   | SPAC16A10.07c | 0.2988755 | Novel | NO  | YES | NO  | NO  |
| SPAC16A10.04  | SPBC1861.09   | 0.2988702 | Novel | NO  | NO  | NO  | NO  |
| SPBC8D2.01    | SPAC23C11.16  | 0.2988002 | Novel | YES | YES | YES | NO  |
| SPBC428.13c   | SPAC926.03    | 0.2987466 | Novel | NO  | YES | NO  | NO  |
| SPACUNK12.02c | SPAC2C4.14c   | 0.2985916 | Novel | NO  | YES | YES | NO  |
| SPAC23A1.06c  | SPAC23C11.11  | 0.2985804 | Novel | NO  | YES | YES | NO  |
| SPBC32H8.10   | SPAC1687.15   | 0.298552  | Novel | NO  | YES | YES | NO  |
| SPCC18B5.03   | SPAC1D4.13    | 0.2984918 | Novel | NO  | YES | NO  | YES |
| SPCC4G3.08    | SPBP19A11.04c | 0.2984912 | Novel | NO  | NO  | NO  | NO  |
| SPCC74.03c    | SPAC821.08c   | 0.2984424 | Novel | NO  | NO  | NO  | NO  |
| SPACUNK12.02c | SPAC3H5.06c   | 0.2984296 | Novel | NO  | NO  | NO  | NO  |
| SPBC2A9.07c   | SPAC23H3.04   | 0.2984084 | Novel | NO  | NO  | YES | NO  |
| SPBC24C6.07   | SPACUNK12.02c | 0.2983991 | Novel | NO  | NO  | NO  | NO  |
| SPCC24B10.07  | SPBC4C3.12    | 0.2983964 | Novel | NO  | NO  | NO  | NO  |
| SPAC1F7.04    | SPBC8D2.01    | 0.2983275 | Novel | NO  | NO  | NO  | NO  |

|               |               |           |       |     |     |     |     |
|---------------|---------------|-----------|-------|-----|-----|-----|-----|
| SPAC2F3.15    | SPAC19E9.03   | 0.2983272 | Novel | NO  | NO  | NO  | NO  |
| SPCC417.06c   | SPCC31H12.05c | 0.2983117 | Novel | YES | NO  | NO  | NO  |
| SPBC543.07    | SPAC2G11.07c  | 0.2983    | Novel | NO  | NO  | NO  | NO  |
| SPAC2F3.15    | SPBC29A10.15  | 0.2982968 | Novel | NO  | YES | NO  | NO  |
| SPBC359.04c   | SPAC23H3.04   | 0.2982697 | Novel | NO  | NO  | NO  | NO  |
| SPBC800.05c   | SPAC23D3.09   | 0.2982572 | Novel | NO  | NO  | NO  | NO  |
| SPBC3F6.01c   | SPBC119.08    | 0.2982368 | Novel | YES | NO  | NO  | NO  |
| SPAC23H3.04   | SPCC1183.12   | 0.2982315 | Novel | NO  | NO  | NO  | NO  |
| SPAC23H3.04   | SPBC25H2.09   | 0.2982152 | Novel | NO  | NO  | YES | NO  |
| SPBC215.13    | SPBC18E5.03c  | 0.2982088 | Novel | NO  | NO  | NO  | NO  |
| SPAC17G8.14c  | SPAC4G8.05    | 0.2980928 | Novel | NO  | YES | YES | NO  |
| SPBC21.06c    | SPBC1861.09   | 0.2980895 | Novel | NO  | YES | YES | NO  |
| SPAC23H3.04   | SPAC4F8.01    | 0.2980855 | Novel | NO  | NO  | NO  | NO  |
| SPBC29A10.15  | SPAC2C4.14c   | 0.2980693 | Novel | NO  | YES | NO  | NO  |
| SPBC32F12.09  | SPBC11C11.02  | 0.2980249 | Novel | NO  | NO  | NO  | YES |
| SPBC16H5.11c  | SPCC4G3.08    | 0.2979789 | Novel | NO  | NO  | NO  | NO  |
| SPAC23H3.04   | SPAC8C9.10c   | 0.2979768 | Novel | NO  | NO  | NO  | NO  |
| SPAC630.14c   | SPAC644.12    | 0.2979548 | Novel | NO  | YES | NO  | NO  |
| SPAC22E12.14c | SPACUNK12.02c | 0.2979529 | Novel | NO  | YES | YES | NO  |
| SPCC24B10.07  | SPBC776.02c   | 0.2978985 | Novel | NO  | NO  | NO  | NO  |
| SPCC162.10    | SPBC106.10    | 0.2978883 | Novel | NO  | YES | YES | NO  |
| SPAC23H3.04   | SPBC24C6.02   | 0.2978769 | Novel | NO  | NO  | NO  | NO  |
| SPBC1703.10   | SPBC1604.14c  | 0.2978414 | Novel | NO  | NO  | YES | NO  |
| SPAC18B11.10  | SPAC4D7.03    | 0.2978402 | Novel | NO  | YES | NO  | NO  |
| SPAC144.14    | SPAC23H3.04   | 0.2977551 | Novel | NO  | NO  | NO  | NO  |
| SPAC23H3.04   | SPCC736.02    | 0.2977472 | Novel | NO  | NO  | YES | NO  |
| SPAC16A10.04  | SPAC3A11.12c  | 0.2977327 | Novel | NO  | NO  | NO  | NO  |
| SPBC3B9.18c   | SPAC23H3.04   | 0.2976799 | Novel | NO  | NO  | NO  | NO  |
| SPAC22E12.14c | SPBC21C3.20c  | 0.2976721 | Novel | NO  | NO  | YES | YES |
| SPBC649.05    | SPCC74.03c    | 0.2976009 | Novel | NO  | NO  | NO  | NO  |
| SPAC823.08c   | SPBC14C8.07c  | 0.2975875 | Novel | NO  | YES | NO  | NO  |
| SPCC970.04c   | SPCC18B5.11c  | 0.2975863 | Novel | YES | YES | YES | NO  |
| SPCC16C4.11   | SPCC1919.01   | 0.2974644 | Novel | NO  | YES | YES | NO  |
| SPAC31G5.09c  | SPBC21.06c    | 0.2973934 | Novel | NO  | YES | YES | NO  |
| SPAC57A7.08   | SPAC24H6.05   | 0.2973493 | Novel | YES | NO  | YES | NO  |
| SPAC1B9.02c   | SPBC17F3.02   | 0.2973414 | Novel | NO  | YES | YES | NO  |
| SPBC21.06c    | SPBC19F8.07   | 0.2973318 | Novel | NO  | YES | YES | NO  |
| SPAC23H3.04   | SPAC664.15    | 0.2973219 | Novel | NO  | NO  | NO  | NO  |
| SPAPB2B4.03   | SPAC20H4.09   | 0.2972832 | Novel | NO  | NO  | NO  | NO  |
| SPAC23H3.04   | SPBC19C2.10   | 0.2972441 | Novel | NO  | NO  | YES | NO  |
| SPAC11E3.09   | SPAC26F1.10c  | 0.2971141 | Novel | NO  | YES | YES | YES |
| SPAC1782.09c  | SPBC106.10    | 0.2971015 | Novel | YES | YES | NO  | NO  |
| SPCC18B5.03   | SPBC32H8.10   | 0.2970663 | Novel | NO  | YES | NO  | NO  |
| SPBC4.04c     | SPBC409.05    | 0.2970598 | Novel | NO  | NO  | NO  | YES |
| SPAC823.15    | SPBC106.10    | 0.2970413 | Novel | NO  | NO  | NO  | NO  |
| SPBC543.07    | SPCC162.10    | 0.2970402 | Novel | NO  | YES | YES | NO  |
| SPAC821.12    | SPCC188.12    | 0.2970391 | Novel | NO  | NO  | NO  | NO  |

|               |               |           |       |     |     |     |     |
|---------------|---------------|-----------|-------|-----|-----|-----|-----|
| SPBC543.07    | SPAC23D3.04c  | 0.2969222 | Novel | YES | NO  | NO  | NO  |
| SPBC428.16c   | SPBC23G7.12c  | 0.2969221 | Novel | NO  | NO  | NO  | NO  |
| SPBC106.10    | SPBC16H5.07c  | 0.2969025 | Novel | YES | NO  | NO  | NO  |
| SPAC20H4.11c  | SPAC4G8.05    | 0.2968073 | Novel | NO  | NO  | NO  | NO  |
| SPAPYUG7.02c  | SPBC8D2.01    | 0.2966919 | Novel | NO  | NO  | NO  | NO  |
| SPAC823.08c   | SPCC1259.13   | 0.296641  | Novel | NO  | YES | NO  | NO  |
| SPCC191.08    | SPAC23H3.04   | 0.2966386 | Novel | NO  | NO  | YES | NO  |
| SPCC16C4.11   | SPCC970.04c   | 0.2966378 | Novel | NO  | YES | YES | NO  |
| SPCC1739.12   | SPCC4G3.08    | 0.2966326 | Novel | NO  | NO  | NO  | NO  |
| SPAC23H3.04   | SPAC227.10    | 0.2966222 | Novel | NO  | NO  | NO  | NO  |
| SPAC6F6.08c   | SPBC119.08    | 0.296597  | Novel | NO  | YES | NO  | NO  |
| SPBC32F12.09  | SPCC16A11.17  | 0.2965911 | Novel | NO  | NO  | NO  | YES |
| SPBC21C3.20c  | SPAC821.12    | 0.2965091 | Novel | NO  | NO  | NO  | NO  |
| SPAC110.03    | SPBPJ4664.02  | 0.2964607 | Novel | NO  | NO  | NO  | NO  |
| SPAC23H3.04   | SPBC15D4.01c  | 0.2964024 | Novel | NO  | NO  | NO  | NO  |
| SPCC16C4.07   | SPCC24B10.07  | 0.2963938 | Novel | NO  | NO  | NO  | NO  |
| SPAC17H9.09c  | SPBC16E9.10c  | 0.2963553 | Novel | NO  | NO  | NO  | NO  |
| SPCC24B10.07  | SPAC6F12.12   | 0.2963307 | Novel | NO  | NO  | NO  | NO  |
| SPAC23H3.04   | SPCP20C8.01c  | 0.2962818 | Novel | NO  | NO  | YES | NO  |
| SPCC16C4.11   | SPAC23C11.11  | 0.2962695 | Novel | NO  | YES | YES | NO  |
| SPBC21.07c    | SPAC23H3.04   | 0.2962315 | Novel | NO  | NO  | NO  | NO  |
| SPAC23H3.04   | SPAC4G8.10    | 0.2962183 | Novel | YES | NO  | NO  | NO  |
| SPAC1565.06c  | SPBC11C11.02  | 0.2961838 | Novel | NO  | YES | NO  | YES |
| SPAC19G12.14  | SPCC4G3.08    | 0.2961515 | Novel | NO  | YES | YES | NO  |
| SPBC8D2.01    | SPBC29B5.01   | 0.2961508 | Novel | NO  | NO  | NO  | NO  |
| SPCC18B5.03   | SPBC17F3.02   | 0.2961349 | Novel | NO  | YES | NO  | YES |
| SPAC23H3.04   | SPAC11E3.01c  | 0.2961246 | Novel | NO  | NO  | NO  | NO  |
| SPAC17H9.09c  | SPBPJ4664.02  | 0.2961197 | Novel | NO  | NO  | NO  | NO  |
| SPBC8D2.01    | SPAC821.08c   | 0.2961161 | Novel | NO  | NO  | NO  | NO  |
| SPBC649.05    | SPACUNK12.02c | 0.2961104 | Novel | NO  | NO  | NO  | NO  |
| SPAC23H3.04   | SPCC1450.03   | 0.2960627 | Novel | NO  | NO  | NO  | NO  |
| SPBC216.07c   | SPAC6B12.15   | 0.2960442 | Novel | YES | YES | NO  | YES |
| SPAC23H3.04   | SPCC777.10c   | 0.2959758 | Novel | NO  | NO  | NO  | NO  |
| SPAC22E12.14c | SPAC6F12.15c  | 0.2959609 | Novel | NO  | NO  | NO  | YES |
| SPCC320.13c   | SPCC1322.08   | 0.295932  | Novel | NO  | YES | NO  | NO  |
| SPAC1B9.02c   | SPCC5E4.04    | 0.2958987 | Novel | NO  | NO  | NO  | YES |
| SPBC1861.09   | SPBC30D10.10c | 0.295898  | Novel | NO  | YES | NO  | NO  |
| SPBC19C2.05   | SPBC119.08    | 0.2958906 | Novel | YES | YES | YES | NO  |
| SPBC4C3.12    | SPAC1687.15   | 0.2958454 | Novel | NO  | NO  | NO  | NO  |
| SPAC1F7.04    | SPCC18B5.11c  | 0.2958378 | Novel | NO  | YES | NO  | NO  |
| SPAC6F12.12   | SPAC2C4.14c   | 0.295772  | Novel | YES | NO  | NO  | NO  |
| SPAC1782.09c  | SPAC1687.15   | 0.295734  | Novel | NO  | NO  | NO  | YES |
| SPCC576.03c   | SPBC8D2.01    | 0.2955322 | Novel | YES | NO  | NO  | NO  |
| SPBC12D12.08c | SPBC19C7.09c  | 0.2954997 | Novel | NO  | NO  | NO  | NO  |
| SPCC576.15c   | SPACUNK12.02c | 0.2954802 | Novel | NO  | YES | YES | NO  |
| SPBC2F12.09c  | SPBC8D2.01    | 0.2954732 | Novel | NO  | NO  | NO  | NO  |
| SPAC1783.07c  | SPBC8D2.01    | 0.2954505 | Novel | YES | NO  | NO  | NO  |

|               |               |           |       |     |     |     |     |
|---------------|---------------|-----------|-------|-----|-----|-----|-----|
| SPAC821.12    | SPAC1687.15   | 0.2954287 | Novel | NO  | YES | YES | NO  |
| SPAC22E12.14c | SPAC56F8.16   | 0.295408  | Novel | NO  | NO  | NO  | YES |
| SPCC18B5.03   | SPBP4H10.04   | 0.2953759 | Novel | NO  | NO  | NO  | YES |
| SPBC409.07c   | SPBC12D12.04c | 0.2953742 | Novel | NO  | YES | YES | YES |
| SPBC32F12.04  | SPAC18B11.07c | 0.2953658 | Novel | NO  | NO  | NO  | NO  |
| SPBC582.03    | SPBC32H8.10   | 0.2953375 | Novel | NO  | YES | NO  | NO  |
| SPBC11B10.09  | SPAC23C4.18c  | 0.2953358 | Novel | NO  | YES | YES | YES |
| SPAC31G5.09c  | SPBC409.09c   | 0.2953212 | Novel | NO  | NO  | NO  | NO  |
| SPCC16C4.11   | SPAC1565.04c  | 0.295319  | Novel | NO  | YES | NO  | NO  |
| SPCC1259.13   | SPAC14C4.03   | 0.2953022 | Novel | NO  | YES | YES | YES |
| SPCC162.10    | SPAC23C4.08   | 0.2952607 | Novel | NO  | NO  | NO  | NO  |
| SPAC22E12.14c | SPCC622.09    | 0.2952496 | Novel | NO  | NO  | NO  | YES |
| SPBC649.05    | SPAC1687.15   | 0.2952145 | Novel | NO  | NO  | NO  | NO  |
| SPCC16C4.11   | SPAC22F3.03c  | 0.2951307 | Novel | NO  | YES | NO  | NO  |
| SPAC824.04    | SPBC32H8.07   | 0.2950854 | Novel | NO  | NO  | NO  | NO  |
| SPCC1259.13   | SPAC9G1.09    | 0.295027  | Novel | NO  | YES | YES | NO  |
| SPBC24C6.07   | SPCC18B5.11c  | 0.2949898 | Novel | NO  | YES | NO  | NO  |
| SPAC3A11.12c  | SPAC23C4.08   | 0.2949804 | Novel | NO  | NO  | NO  | NO  |
| SPBP23A10.08  | SPBC16A3.15c  | 0.2948965 | Novel | NO  | NO  | NO  | NO  |
| SPBC11B10.09  | SPCC16A11.02  | 0.2947078 | Novel | NO  | NO  | NO  | NO  |
| SPBC649.05    | SPBC8D2.01    | 0.2946872 | Novel | NO  | NO  | NO  | NO  |
| SPBC4.07c     | SPBC1703.10   | 0.2946818 | Novel | NO  | NO  | NO  | NO  |
| SPBC8D2.19    | SPBC18H10.15  | 0.2945813 | Novel | NO  | YES | YES | NO  |
| SPBC32F12.09  | SPBC25D12.03c | 0.2945488 | Novel | NO  | NO  | NO  | YES |
| SPBC21B10.05c | SPAC644.12    | 0.2945432 | Novel | NO  | YES | NO  | YES |
| SPCC1223.06   | SPBC1703.10   | 0.2945431 | Novel | NO  | NO  | NO  | NO  |
| SPBC32F12.04  | SPAC16.01     | 0.2945256 | Novel | NO  | YES | NO  | NO  |
| SPCC1682.02c  | SPBC14C8.07c  | 0.2945216 | Novel | YES | YES | YES | YES |
| SPCC18B5.03   | SPBC3F6.01c   | 0.2944508 | Novel | NO  | NO  | NO  | NO  |
| SPAC977.10    | SPBC8D2.01    | 0.2943558 | Novel | NO  | NO  | NO  | NO  |
| SPBC18H10.15  | SPAC23H4.17c  | 0.2943418 | Novel | NO  | YES | YES | NO  |
| SPCC1259.15c  | SPBC800.05c   | 0.2942971 | Novel | NO  | NO  | NO  | NO  |
| SPBC13E7.09   | SPBC28E12.03  | 0.2942277 | Novel | NO  | YES | NO  | NO  |
| SPCC18B5.11c  | SPBC14C8.07c  | 0.2941953 | Novel | NO  | YES | YES | YES |
| SPCC18B5.03   | SPAC23A1.06c  | 0.2941941 | Novel | NO  | YES | YES | YES |
| SPAC110.03    | SPAC23D3.10c  | 0.2941582 | Novel | NO  | NO  | NO  | NO  |
| SPCC4B3.15    | SPBC11C11.02  | 0.2941483 | Novel | NO  | YES | NO  | YES |
| SPCC576.15c   | SPAC24H6.05   | 0.2940678 | Novel | YES | YES | NO  | NO  |
| SPBC25D12.03c | SPBC29A10.15  | 0.2940068 | Novel | YES | YES | YES | YES |
| SPBC4.07c     | SPBC887.04c   | 0.2940052 | Novel | NO  | YES | YES | NO  |
| SPCC4G3.08    | SPAC1F5.08c   | 0.2939524 | Novel | NO  | NO  | NO  | NO  |
| SPAC823.08c   | SPAC24H6.05   | 0.2939435 | Novel | NO  | NO  | NO  | NO  |
| SPBC4.04c     | SPCC5E4.04    | 0.2939277 | Novel | YES | NO  | NO  | YES |
| SPAC9G1.09    | SPAC1006.09   | 0.2938715 | Novel | NO  | YES | YES | NO  |
| SPCC16C4.11   | SPBC3F6.01c   | 0.2938277 | Novel | NO  | NO  | YES | NO  |
| SPAC24B11.11c | SPBPJ4664.02  | 0.2938257 | Novel | NO  | NO  | NO  | NO  |
| SPBC32C12.03c | SPBC19F8.07   | 0.2937947 | Novel | NO  | YES | YES | NO  |

|               |               |           |       |     |     |     |     |
|---------------|---------------|-----------|-------|-----|-----|-----|-----|
| SPBC30D10.10c | SPAC4G8.05    | 0.2937218 | Novel | NO  | YES | NO  | NO  |
| SPBC216.05    | SPAC1B2.05    | 0.2936996 | Novel | NO  | YES | NO  | YES |
| SPAC17A2.13c  | SPCC74.03c    | 0.2936977 | Novel | NO  | NO  | NO  | NO  |
| SPAC1D4.13    | SPACUNK12.02c | 0.293663  | Novel | NO  | YES | YES | NO  |
| SPBC11B10.09  | SPAPJ698.03c  | 0.2936519 | Novel | NO  | NO  | NO  | YES |
| SPCC24B10.07  | SPCC31H12.05c | 0.2935854 | Novel | NO  | NO  | NO  | NO  |
| SPAC18G6.03   | SPBC19C2.05   | 0.2935585 | Novel | YES | NO  | NO  | NO  |
| SPAC664.01c   | SPBC1105.09   | 0.2935363 | Novel | NO  | NO  | YES | NO  |
| SPAC22E12.14c | SPBC1778.10c  | 0.293518  | Novel | NO  | YES | YES | NO  |
| SPAC31G5.09c  | SPAC8E11.02c  | 0.2935002 | Novel | NO  | NO  | NO  | YES |
| SPAC23H3.04   | SPAC17C9.14   | 0.2934903 | Novel | NO  | NO  | NO  | NO  |
| SPCC16C4.11   | SPAC20G8.01   | 0.2934867 | Novel | NO  | YES | NO  | NO  |
| SPBC8D2.01    | SPAC1F5.09c   | 0.2934477 | Novel | NO  | YES | YES | NO  |
| SPAC23H3.04   | SPCC1620.11   | 0.2934235 | Novel | NO  | NO  | NO  | NO  |
| SPBP8B7.26    | SPAC23H3.04   | 0.2933358 | Novel | NO  | NO  | YES | NO  |
| SPAC22E12.14c | SPBC14C8.01c  | 0.2933252 | Novel | NO  | NO  | NO  | YES |
| SPBC3D6.09    | SPBC25D12.03c | 0.2933138 | Novel | NO  | YES | YES | YES |
| SPBC12D12.04c | SPAC1687.15   | 0.2932602 | Novel | NO  | YES | YES | NO  |
| SPAC24B11.06c | SPBC216.07c   | 0.2932478 | Novel | YES | YES | NO  | NO  |
| SPAC3A11.14c  | SPBC2F12.13   | 0.2932184 | Novel | NO  | YES | YES | YES |
| SPCC576.10c   | SPAC23C4.08   | 0.2931997 | Novel | NO  | NO  | NO  | NO  |
| SPBC660.14    | SPAC19E9.02   | 0.2931463 | Novel | NO  | YES | YES | YES |
| SPACUNK12.02c | SPAC1F3.02c   | 0.2931211 | Novel | NO  | YES | YES | NO  |
| SPAC23H3.04   | SPAC25G10.01  | 0.2931172 | Novel | NO  | NO  | YES | NO  |
| SPBC21.06c    | SPBC1703.10   | 0.2930562 | Novel | NO  | NO  | NO  | NO  |
| SPCC162.10    | SPBC1604.14c  | 0.2930372 | Novel | NO  | YES | YES | NO  |
| SPBC1718.07c  | SPCC18B5.11c  | 0.2929984 | Novel | NO  | YES | NO  | YES |
| SPBC211.04c   | SPBC216.05    | 0.2929872 | Novel | NO  | YES | NO  | YES |
| SPAC57A7.08   | SPBC409.04c   | 0.292952  | Novel | YES | NO  | NO  | NO  |
| SPAC18G6.03   | SPAC17G6.04c  | 0.2929152 | Novel | NO  | NO  | NO  | NO  |
| SPAC31G5.09c  | SPCC4G3.08    | 0.2929056 | Novel | NO  | YES | YES | NO  |
| SPAC11E3.09   | SPAC2F3.15    | 0.2929038 | Novel | NO  | NO  | NO  | NO  |
| SPAC23H3.04   | SPCC1393.02c  | 0.2928381 | Novel | NO  | NO  | NO  | NO  |
| SPAC1D4.13    | SPAC6F6.08c   | 0.2928349 | Novel | NO  | YES | NO  | YES |
| SPACUNK12.02c | SPBC1734.02c  | 0.2928246 | Novel | NO  | NO  | NO  | NO  |
| SPCC18B5.11c  | SPCC1919.01   | 0.2928216 | Novel | NO  | YES | YES | NO  |
| SPCC16C4.11   | SPBC16E9.11c  | 0.2927449 | Novel | NO  | NO  | NO  | NO  |
| SPAC110.03    | SPAPB15E9.01c | 0.2927118 | Novel | NO  | NO  | NO  | NO  |
| SPBC11B10.09  | SPAC6G10.12c  | 0.2926826 | Novel | NO  | NO  | NO  | YES |
| SPBC19G7.05c  | SPBC11C11.02  | 0.2926627 | Novel | NO  | NO  | NO  | YES |
| SPBC336.04    | SPAC2C4.14c   | 0.2926005 | Novel | NO  | NO  | NO  | NO  |
| SPACUNK12.02c | SPBC1921.02   | 0.2925948 | Novel | NO  | NO  | NO  | NO  |
| SPBC776.12c   | SPAC14C4.03   | 0.2925758 | Novel | NO  | YES | YES | YES |
| SPAC24B11.06c | SPAC4F10.15c  | 0.2925362 | Novel | NO  | YES | NO  | NO  |
| SPBC215.13    | SPAC821.12    | 0.2925049 | Novel | NO  | NO  | NO  | NO  |
| SPBC776.12c   | SPCC320.13c   | 0.2924656 | Novel | NO  | YES | NO  | NO  |
| SPAC644.04    | SPCC663.05c   | 0.2924564 | Novel | NO  | YES | NO  | NO  |

|               |              |           |       |     |     |     |     |
|---------------|--------------|-----------|-------|-----|-----|-----|-----|
| SPAC1F7.04    | SPAC23H4.17c | 0.29244   | Novel | NO  | NO  | NO  | NO  |
| SPBC2F12.08c  | SPCC663.05c  | 0.2923852 | Novel | NO  | YES | NO  | NO  |
| SPBC543.07    | SPAC1565.06c | 0.2922892 | Novel | NO  | NO  | YES | YES |
| SPAC821.12    | SPAC328.03   | 0.2922537 | Novel | NO  | YES | YES | NO  |
| SPBC1921.03c  | SPBC29A3.09c | 0.292203  | Novel | NO  | NO  | NO  | NO  |
| SPBC336.04    | SPBC8D2.01   | 0.2921653 | Novel | NO  | NO  | NO  | NO  |
| SPAC2F3.15    | SPAC821.08c  | 0.2921555 | Novel | NO  | NO  | NO  | NO  |
| SPAPB15E9.01c | SPAC23C4.08  | 0.2921358 | Novel | NO  | NO  | NO  | NO  |
| SPACUNK12.02c | SPCC4B3.12   | 0.2920391 | Novel | NO  | NO  | NO  | NO  |
| SPAC664.07c   | SPCC4G3.08   | 0.2920239 | Novel | NO  | NO  | NO  | NO  |
| SPAC24H6.09   | SPAC9G1.09   | 0.2919811 | Novel | NO  | YES | NO  | NO  |
| SPAC6F6.08c   | SPBC11C11.02 | 0.2919629 | Novel | NO  | YES | NO  | YES |
| SPBC8D2.01    | SPAC20H4.11c | 0.2919477 | Novel | NO  | NO  | NO  | NO  |
| SPAC23H3.04   | SPAC9E9.14   | 0.2919459 | Novel | NO  | NO  | NO  | NO  |
| SPBC21C3.18   | SPAC1B2.05   | 0.2919279 | Novel | YES | YES | NO  | NO  |
| SPAPJ760.02c  | SPAC23H3.04  | 0.2919104 | Novel | NO  | NO  | NO  | NO  |
| SPBC3D6.09    | SPBC211.04c  | 0.2918983 | Novel | NO  | YES | YES | YES |
| SPAC222.03c   | SPAC23H3.04  | 0.2918977 | Novel | NO  | NO  | NO  | NO  |
| SPBC21C3.16c  | SPCC663.05c  | 0.291894  | Novel | YES | YES | NO  | NO  |
| SPAC1805.12c  | SPAC26A3.16  | 0.2917705 | Novel | NO  | NO  | NO  | YES |
| SPAC26A3.16   | SPAC11G7.04  | 0.2917705 | Novel | NO  | NO  | NO  | YES |
| SPCC576.15c   | SPBC1778.10c | 0.2917476 | Novel | NO  | YES | YES | NO  |
| SPCC576.15c   | SPCC18B5.03  | 0.2917435 | Novel | NO  | YES | NO  | NO  |
| SPBC32F12.04  | SPAC1250.03  | 0.291638  | Novel | NO  | NO  | NO  | NO  |
| SPBP23A10.08  | SPAC4A8.15c  | 0.2916219 | Novel | NO  | NO  | NO  | NO  |
| SPAC22H12.02  | SPBC1105.09  | 0.2915754 | Novel | NO  | NO  | NO  | NO  |
| SPAC24H6.05   | SPCC1919.01  | 0.2915388 | Novel | NO  | NO  | NO  | NO  |
| SPBC428.08c   | SPBC1105.09  | 0.291516  | Novel | NO  | NO  | YES | NO  |
| SPAC23H3.04   | SPBC713.04c  | 0.2915077 | Novel | NO  | NO  | NO  | NO  |
| SPCC1259.13   | SPCC4G3.08   | 0.2914448 | Novel | NO  | YES | YES | NO  |
| SPBC32C12.02  | SPAC23C11.11 | 0.2914393 | Novel | NO  | NO  | NO  | NO  |
| SPBC354.03    | SPCC18.05c   | 0.2912946 | Novel | NO  | NO  | NO  | NO  |
| SPBC1734.06   | SPCC777.10c  | 0.2912424 | Novel | NO  | NO  | NO  | NO  |
| SPBC428.13c   | SPCC4G3.08   | 0.2912351 | Novel | NO  | NO  | NO  | NO  |
| SPBC409.07c   | SPBC17F3.02  | 0.2911888 | Novel | YES | YES | YES | YES |
| SPCC24B10.07  | SPAC23H4.17c | 0.2911712 | Novel | NO  | YES | YES | NO  |
| SPBC146.13c   | SPCC1739.11c | 0.2911627 | Novel | YES | YES | YES | NO  |
| SPBC4C3.05c   | SPAC22A12.05 | 0.2911577 | Novel | NO  | YES | NO  | NO  |
| SPAC23H3.04   | SPCC285.15c  | 0.2911362 | Novel | NO  | NO  | NO  | NO  |
| SPAC23H3.04   | SPAC25G10.06 | 0.2911362 | Novel | NO  | NO  | NO  | NO  |
| SPCC1919.15   | SPCC777.10c  | 0.2910922 | Novel | NO  | NO  | NO  | NO  |
| SPCC16C4.11   | SPBC409.04c  | 0.2910471 | Novel | NO  | YES | NO  | NO  |
| SPBC4.04c     | SPCC736.14   | 0.2910173 | Novel | YES | NO  | NO  | YES |
| SPAC22E12.14c | SPAC1782.09c | 0.291007  | Novel | NO  | NO  | NO  | NO  |
| SPAC144.13c   | SPAC2F3.15   | 0.2909959 | Novel | NO  | NO  | NO  | NO  |
| SPCC970.10c   | SPCC777.10c  | 0.2909669 | Novel | NO  | NO  | NO  | NO  |
| SPBC4F6.12    | SPBC11C11.02 | 0.2909422 | Novel | YES | YES | YES | YES |



|               |               |           |       |     |     |     |     |
|---------------|---------------|-----------|-------|-----|-----|-----|-----|
| SPAC23H3.04   | SPBC1734.16c  | 0.2908883 | Novel | NO  | NO  | NO  | NO  |
| SPAC821.12    | SPBC1778.10c  | 0.2908768 | Novel | NO  | YES | YES | NO  |
| SPBP16F5.02   | SPAC1687.15   | 0.2908057 | Novel | NO  | NO  | NO  | NO  |
| SPAC1D4.06c   | SPAC2C4.14c   | 0.290804  | Novel | NO  | YES | YES | NO  |
| SPACUNK12.02c | SPBC18H10.15  | 0.2907969 | Novel | NO  | YES | YES | NO  |
| SPAC1F3.02c   | SPAC4G8.05    | 0.2907631 | Novel | NO  | YES | YES | NO  |
| SPAPB18E9.04c | SPAC2C4.14c   | 0.2907623 | Novel | NO  | NO  | NO  | NO  |
| SPCC4E9.02    | SPAC11E3.04c  | 0.2907564 | Novel | NO  | NO  | NO  | NO  |
| SPAC16.01     | SPCC18B5.11c  | 0.290738  | Novel | YES | YES | NO  | NO  |
| SPAC821.09    | SPCC24B10.07  | 0.2907267 | Novel | NO  | NO  | NO  | NO  |
| SPACUNK12.02c | SPCC306.03c   | 0.2907103 | Novel | NO  | NO  | NO  | NO  |
| SPBC409.04c   | SPBC11B10.09  | 0.2906625 | Novel | NO  | YES | NO  | NO  |
| SPBP23A10.08  | SPBC800.05c   | 0.2906359 | Novel | NO  | NO  | NO  | NO  |
| SPAC30D11.10  | SPBC1105.09   | 0.2906306 | Novel | NO  | NO  | NO  | NO  |
| SPBC409.07c   | SPAC23C11.11  | 0.2905822 | Novel | NO  | YES | YES | NO  |
| SPCC1259.15c  | SPBC16A3.15c  | 0.290554  | Novel | NO  | NO  | NO  | NO  |
| SPAC6B12.15   | SPAC6F12.15c  | 0.290548  | Novel | NO  | YES | NO  | NO  |
| SPAC9G1.09    | SPCC24B10.13  | 0.2905178 | Novel | NO  | NO  | NO  | NO  |
| SPBC11B10.09  | SPBC19C2.01   | 0.2904329 | Novel | NO  | YES | NO  | YES |
| SPAC23H3.04   | SPAC110.04c   | 0.2904295 | Novel | NO  | NO  | NO  | NO  |
| SPBC1D7.05    | SPBC106.10    | 0.2904031 | Novel | YES | YES | YES | NO  |
| SPAC23H3.04   | SPAC664.08c   | 0.2903933 | Novel | NO  | NO  | NO  | NO  |
| SPBC32F12.04  | SPAC20H4.11c  | 0.2903723 | Novel | NO  | YES | NO  | NO  |
| SPAC1D4.06c   | SPBC1604.14c  | 0.2903546 | Novel | NO  | YES | YES | YES |
| SPAC23H3.04   | SPAC23A1.17   | 0.2902798 | Novel | NO  | NO  | NO  | NO  |
| SPBC409.07c   | SPCC4G3.08    | 0.2902702 | Novel | NO  | YES | YES | NO  |
| SPACUNK12.02c | SPCC1739.11c  | 0.2902294 | Novel | NO  | NO  | NO  | NO  |
| SPAC24B11.11c | SPBC30D10.10c | 0.2901621 | Novel | NO  | YES | NO  | NO  |
| SPAC23H3.04   | SPAC23C11.03  | 0.29014   | Novel | NO  | NO  | NO  | NO  |
| SPBC409.07c   | SPBC32C12.03c | 0.2901277 | Novel | NO  | YES | YES | NO  |
| SPBC32F12.09  | SPAC57A10.05c | 0.2901267 | Novel | NO  | NO  | NO  | NO  |
| SPBC11B10.09  | SPBC1778.10c  | 0.2901069 | Novel | NO  | YES | YES | NO  |
| SPBC12D12.01  | SPAC27F1.02c  | 0.2900697 | Novel | NO  | NO  | NO  | YES |
| SPBC354.03    | SPBC6B1.07    | 0.2900686 | Novel | NO  | NO  | NO  | NO  |
| SPBC11C11.02  | SPBC1778.06c  | 0.2900205 | Novel | YES | NO  | YES | YES |

For the first pair, protein A (SPCC23B6.03c) interacts with protein B (SPBC216.05) with a score of ~0.9999994; this interactions has been previously reported using a wetlab method (hence, "known"); proteins A and B are not found within the same cellular component and are not involved in the same cellular process; however, they both have a same function and interact with a third independent protein.

Table S2. Predicted interactions between 29 proteins with established roles in the efficiency of double stranded (ds) DNA break repair and all other human proteins (1,037 pairs).

| Protein A | Protein B | Score      | Status |
|-----------|-----------|------------|--------|
| Q13315    | P78527    | 0.99999968 | Known  |
| Q13315    | P51587    | 0.99999961 | Known  |
| P51587    | P21333    | 0.99999955 | Known  |
| Q13535    | P51587    | 0.99999955 | Known  |
| Q13535    | Q13315    | 0.9999995  | Known  |
| P78527    | P38398    | 0.99999947 | Known  |
| Q9Y4A5    | P38398    | 0.99999944 | Known  |
| P51587    | P38398    | 0.99999936 | Known  |
| Q14676    | Q13315    | 0.99999936 | Known  |
| Q13315    | Q12888    | 0.99999933 | Known  |
| Q13315    | P38398    | 0.99999929 | Known  |
| Q92793    | Q14676    | 0.9999992  | Known  |
| Q14839    | Q13535    | 0.9999992  | Known  |
| Q9BXW9    | P51587    | 0.99999919 | Known  |
| Q14676    | Q09472    | 0.99999919 | Known  |
| Q13535    | P38398    | 0.99999917 | Known  |
| Q92547    | Q13315    | 0.99999912 | Known  |
| Q92793    | P38398    | 0.9999991  | Known  |
| Q7Z589    | P51587    | 0.9999991  | Known  |
| Q9BXW9    | Q13315    | 0.99999909 | Known  |
| Q09472    | P38398    | 0.99999909 | Known  |
| Q14191    | Q13315    | 0.99999907 | Known  |
| Q13085    | P38398    | 0.99999907 | Known  |
| Q13315    | P54132    | 0.99999906 | Known  |
| Q92547    | O95071    | 0.99999904 | Known  |
| Q13315    | P52701    | 0.99999902 | Known  |
| Q14676    | P24928    | 0.99999901 | Known  |
| Q14676    | Q12888    | 0.99999901 | Known  |
| Q86YC2    | P51587    | 0.99999899 | Known  |
| Q9UHV7    | P38398    | 0.99999899 | Known  |
| Q92878    | Q13315    | 0.99999898 | Known  |
| Q14676    | P38398    | 0.99999895 | Known  |
| Q14191    | Q13535    | 0.99999892 | Known  |
| Q14683    | Q13315    | 0.99999892 | Known  |
| P38398    | P24928    | 0.99999889 | Known  |
| Q12888    | P38398    | 0.99999889 | Known  |
| P51587    | O60566    | 0.99999886 | Known  |
| Q13535    | P35968    | 0.99999886 | Known  |
| Q9HAW4    | Q13535    | 0.99999885 | Known  |
| Q13535    | P17948    | 0.99999884 | Known  |
| Q13315    | P35251    | 0.99999883 | Known  |
| Q92547    | Q07864    | 0.99999883 | Known  |
| Q13315    | P00519    | 0.99999881 | Known  |
| P38398    | O60333    | 0.99999879 | Known  |

|        |        |            |       |
|--------|--------|------------|-------|
| Q13367 | Q13315 | 0.99999876 | Known |
| Q5SRE5 | P38398 | 0.99999875 | Known |
| Q92878 | Q09472 | 0.99999871 | Known |
| Q96PY6 | P46100 | 0.99999869 | Known |
| P78527 | O60934 | 0.99999868 | Known |
| P38398 | A7E2E1 | 0.99999867 | Novel |
| P51532 | P38398 | 0.99999867 | Known |
| P38398 | B1A8Z7 | 0.99999864 | Novel |
| Q13535 | P00519 | 0.99999863 | Known |
| Q14676 | Q14191 | 0.99999863 | Known |
| Q9GZU2 | P38398 | 0.99999862 | Known |
| P51531 | P38398 | 0.99999862 | Known |
| P54259 | P46100 | 0.99999861 | Known |
| Q15648 | P38398 | 0.99999861 | Known |
| Q13535 | P28340 | 0.9999986  | Known |
| P78527 | P49959 | 0.99999859 | Known |
| Q13315 | Q10567 | 0.99999858 | Known |
| Q13315 | O94973 | 0.99999857 | Known |
| P38398 | P11388 | 0.99999857 | Known |
| Q13315 | P63010 | 0.99999857 | Known |
| Q13315 | P43246 | 0.99999856 | Known |
| Q92831 | P51587 | 0.99999855 | Known |
| Q13535 | P42336 | 0.99999855 | Known |
| P78527 | O75943 | 0.99999853 | Known |
| Q9P2H0 | P46100 | 0.99999853 | Known |
| Q13315 | P49917 | 0.99999852 | Known |
| Q92878 | Q14676 | 0.99999851 | Known |
| Q9BXW9 | P38398 | 0.99999851 | Known |
| P49790 | P38398 | 0.99999851 | Known |
| Q13315 | P49736 | 0.99999851 | Known |
| Q15596 | P38398 | 0.9999985  | Known |
| Q99708 | Q13315 | 0.9999985  | Known |
| P38398 | O15360 | 0.99999849 | Known |
| P56524 | P46100 | 0.99999848 | Known |
| P51587 | P42229 | 0.99999848 | Known |
| Q9Y6Q9 | P38398 | 0.99999846 | Known |
| Q99728 | P51587 | 0.99999845 | Known |
| P54132 | P38398 | 0.99999845 | Known |
| Q14683 | Q14676 | 0.99999841 | Known |
| Q9ULK4 | P38398 | 0.99999839 | Known |
| P52701 | P38398 | 0.99999838 | Known |
| Q13535 | Q10567 | 0.99999836 | Known |
| Q9HAW4 | P38398 | 0.99999836 | Known |
| Q13535 | O94973 | 0.99999834 | Known |
| Q92547 | Q02880 | 0.99999834 | Known |
| Q13535 | P43246 | 0.99999833 | Known |
| Q92878 | P38398 | 0.99999832 | Known |

|        |        |            |       |
|--------|--------|------------|-------|
| Q8WXE1 | Q13315 | 0.99999829 | Known |
| Q92888 | Q13535 | 0.99999829 | Known |
| Q13535 | P49917 | 0.99999829 | Known |
| Q66K89 | Q13315 | 0.99999828 | Known |
| Q13535 | P49736 | 0.99999828 | Known |
| Q08211 | P38398 | 0.99999827 | Known |
| Q9BX63 | P38398 | 0.99999824 | Known |
| P38398 | O95819 | 0.99999822 | Known |
| P46100 | P29074 | 0.99999822 | Known |
| Q13315 | O60934 | 0.99999821 | Known |
| Q13315 | P40692 | 0.99999821 | Known |
| Q14683 | P38398 | 0.99999821 | Known |
| Q8TAQ2 | P38398 | 0.99999818 | Known |
| Q13315 | P13010 | 0.99999815 | Known |
| Q8WUM0 | P38398 | 0.99999809 | Known |
| P38398 | P23458 | 0.99999809 | Known |
| Q13315 | P49959 | 0.99999809 | Known |
| P38398 | P35251 | 0.99999808 | Known |
| P38398 | P20585 | 0.99999806 | Known |
| Q08999 | P38398 | 0.99999806 | Known |
| P38398 | P00519 | 0.99999805 | Known |
| P38398 | O60674 | 0.99999805 | Known |
| P51587 | O15287 | 0.99999805 | Known |
| Q96SD1 | Q13315 | 0.99999804 | Known |
| Q8N1V2 | P51587 | 0.99999804 | Known |
| Q8WXE1 | Q13535 | 0.99999803 | Known |
| P51587 | P27694 | 0.99999803 | Known |
| Q9H7U1 | P46100 | 0.99999802 | Known |
| Q13315 | O75943 | 0.99999801 | Known |
| Q66K89 | Q13535 | 0.99999801 | Known |
| Q58EY4 | P38398 | 0.999998   | Novel |
| Q92922 | P38398 | 0.999998   | Known |
| P53350 | P51587 | 0.99999798 | Known |
| Q7Z3E1 | Q13315 | 0.99999794 | Known |
| Q13535 | O60934 | 0.99999793 | Known |
| P38398 | P28749 | 0.99999793 | Known |
| Q92547 | O60343 | 0.99999792 | Known |
| Q14676 | Q03188 | 0.99999791 | Known |
| P38398 | P22314 | 0.99999791 | Known |
| Q13315 | P50542 | 0.99999788 | Known |
| P78527 | O14757 | 0.99999787 | Known |
| Q13535 | P13010 | 0.99999786 | Known |
| Q13535 | P33993 | 0.99999782 | Known |
| Q13535 | Q13330 | 0.99999781 | Known |
| Q13535 | P49959 | 0.99999779 | Known |
| Q92878 | P54132 | 0.99999779 | Known |
| P38398 | B4DYQ1 | 0.99999778 | Novel |

|        |        |            |       |
|--------|--------|------------|-------|
| Q15910 | P46100 | 0.99999778 | Known |
| P38398 | O75448 | 0.99999776 | Known |
| Q9UER7 | P46100 | 0.99999776 | Known |
| P51587 | O96017 | 0.99999775 | Known |
| Q09472 | O60934 | 0.99999773 | Known |
| Q9HB96 | P51587 | 0.99999772 | Known |
| P38398 | P19838 | 0.99999771 | Known |
| Q13535 | O75943 | 0.9999977  | Known |
| Q92878 | P52701 | 0.99999769 | Known |
| Q13535 | O94776 | 0.99999765 | Known |
| P43246 | P38398 | 0.99999763 | Known |
| P38398 | P06400 | 0.99999761 | Known |
| P38398 | P10275 | 0.99999759 | Known |
| Q09472 | P49959 | 0.99999758 | Known |
| Q99708 | P38398 | 0.99999753 | Known |
| Q13315 | O96017 | 0.99999749 | Known |
| Q05086 | P38398 | 0.99999747 | Known |
| Q13535 | P27694 | 0.99999745 | Known |
| Q99728 | Q14676 | 0.99999745 | Known |
| Q92547 | Q13873 | 0.99999739 | Known |
| Q14676 | O60934 | 0.99999737 | Known |
| Q15796 | P51587 | 0.99999737 | Known |
| Q07864 | O75943 | 0.99999733 | Known |
| Q92993 | Q13315 | 0.99999733 | Known |
| Q05CR1 | P38398 | 0.99999728 | Novel |
| Q05BW5 | P38398 | 0.99999727 | Novel |
| Q92878 | P35251 | 0.99999726 | Known |
| P55072 | P38398 | 0.99999724 | Known |
| Q92547 | O94985 | 0.99999723 | Known |
| Q13315 | Q00987 | 0.99999721 | Known |
| Q13315 | O15151 | 0.9999972  | Known |
| P42229 | P38398 | 0.9999972  | Known |
| Q14676 | P49959 | 0.9999972  | Known |
| Q16666 | P38398 | 0.99999717 | Known |
| P38398 | P08047 | 0.99999717 | Known |
| Q99728 | P38398 | 0.99999714 | Known |
| Q13315 | O14757 | 0.99999712 | Known |
| P40763 | P38398 | 0.99999711 | Known |
| P84022 | P51587 | 0.9999971  | Known |
| Q13535 | O96017 | 0.99999709 | Known |
| Q06481 | P38398 | 0.99999708 | Known |
| P40692 | P38398 | 0.99999706 | Known |
| P38398 | O60934 | 0.99999705 | Known |
| Q9NXR7 | P51587 | 0.99999703 | Known |
| Q969S8 | Q14676 | 0.99999703 | Known |
| Q9Y620 | Q96JP2 | 0.99999703 | Known |
| P42224 | P38398 | 0.99999703 | Known |

|        |        |            |       |
|--------|--------|------------|-------|
| Q561W3 | Q13315 | 0.99999702 | Novel |
| P38398 | P14859 | 0.999997   | Known |
| P38398 | O14867 | 0.99999697 | Known |
| Q92560 | P38398 | 0.99999694 | Known |
| Q92547 | P29590 | 0.99999692 | Known |
| Q9UBD5 | P38398 | 0.99999687 | Known |
| Q13315 | P54274 | 0.99999686 | Known |
| P51587 | P04637 | 0.99999685 | Known |
| Q6NZY4 | P38398 | 0.99999685 | Known |
| Q13315 | Q01094 | 0.99999685 | Known |
| P49959 | P38398 | 0.99999685 | Known |
| Q15831 | Q13315 | 0.99999682 | Known |
| Q96SD1 | P38398 | 0.99999678 | Known |
| Q92769 | Q13535 | 0.99999675 | Known |
| Q13547 | Q13535 | 0.99999671 | Known |
| Q13535 | O14757 | 0.99999667 | Known |
| Q8NI51 | P38398 | 0.99999663 | Known |
| Q92878 | P43246 | 0.99999662 | Known |
| Q92547 | Q13105 | 0.99999661 | Known |
| P38398 | P11142 | 0.99999654 | Known |
| Q13547 | P46100 | 0.99999651 | Known |
| Q13315 | P04637 | 0.99999648 | Known |
| P38398 | P18887 | 0.99999647 | Known |
| Q99638 | Q13315 | 0.99999646 | Known |
| Q13535 | P63151 | 0.99999644 | Known |
| Q99759 | P38398 | 0.99999643 | Known |
| Q96GD4 | P51587 | 0.99999638 | Known |
| Q13535 | Q01094 | 0.99999635 | Known |
| P38398 | B4DYF9 | 0.99999634 | Novel |
| Q06609 | P51587 | 0.99999632 | Known |
| Q14676 | O96017 | 0.99999631 | Known |
| P38398 | P03372 | 0.99999623 | Known |
| Q7Z569 | P38398 | 0.99999621 | Known |
| Q8WX92 | P38398 | 0.99999613 | Known |
| Q13416 | P38398 | 0.99999611 | Known |
| P38398 | P33240 | 0.99999611 | Known |
| Q12888 | O96017 | 0.99999609 | Known |
| Q9P0W2 | P51587 | 0.99999605 | Known |
| Q7LG56 | Q13315 | 0.99999603 | Known |
| Q9H6X2 | P38398 | 0.99999602 | Known |
| Q9P287 | P51587 | 0.99999601 | Known |
| Q92878 | Q6NUQ1 | 0.999996   | Known |
| P38398 | B1ANC8 | 0.99999598 | Novel |
| Q9UQ80 | Q13535 | 0.99999594 | Known |
| Q13485 | P38398 | 0.99999593 | Known |
| Q13535 | P04637 | 0.99999593 | Known |
| Q04206 | P38398 | 0.99999592 | Known |

|        |        |            |       |
|--------|--------|------------|-------|
| Q14676 | Q00987 | 0.99999591 | Known |
| Q13315 | P16220 | 0.99999591 | Known |
| Q13315 | Q06609 | 0.99999588 | Known |
| P38398 | O96017 | 0.99999586 | Known |
| P54132 | P49959 | 0.99999585 | Known |
| Q14240 | P46100 | 0.99999583 | Known |
| P38398 | O60684 | 0.9999958  | Known |
| Q92878 | P40692 | 0.9999958  | Known |
| Q92878 | O60934 | 0.99999579 | Known |
| Q9GZX5 | P38398 | 0.99999577 | Known |
| P52292 | P38398 | 0.99999575 | Known |
| P38398 | P07602 | 0.9999957  | Known |
| P52701 | P49959 | 0.99999567 | Known |
| Q9Y383 | P46100 | 0.99999566 | Known |
| P38398 | P35269 | 0.99999564 | Known |
| Q12888 | O14757 | 0.99999552 | Known |
| Q92878 | P49959 | 0.99999551 | Known |
| Q00536 | P38398 | 0.99999545 | Known |
| Q9UHK0 | P38398 | 0.99999544 | Known |
| Q14676 | P43694 | 0.99999543 | Known |
| Q96SD1 | Q92878 | 0.9999954  | Known |
| Q92769 | P38398 | 0.99999537 | Known |
| Q96PY6 | P49959 | 0.99999531 | Known |
| Q13547 | P38398 | 0.99999531 | Known |
| P38398 | P31749 | 0.99999529 | Known |
| Q96EY1 | P38398 | 0.99999529 | Known |
| Q9Y620 | Q8N5R6 | 0.99999522 | Known |
| Q15796 | P38398 | 0.99999516 | Known |
| P78396 | P38398 | 0.99999514 | Known |
| P49336 | P38398 | 0.99999513 | Known |
| Q92759 | P38398 | 0.9999951  | Known |
| Q92903 | P38398 | 0.99999509 | Known |
| Q92925 | P38398 | 0.99999504 | Known |
| Q01543 | P38398 | 0.99999499 | Known |
| P38398 | P23258 | 0.99999498 | Known |
| Q9NRH3 | P38398 | 0.99999498 | Novel |
| Q13748 | P38398 | 0.99999497 | Novel |
| Q13509 | P38398 | 0.99999497 | Novel |
| Q9BQE3 | P38398 | 0.99999496 | Novel |
| Q06609 | P46100 | 0.99999495 | Known |
| P68366 | P38398 | 0.99999494 | Known |
| Q9BUF5 | P38398 | 0.99999492 | Novel |
| Q13885 | P38398 | 0.99999491 | Novel |
| Q9BVA1 | P38398 | 0.99999491 | Novel |
| P68371 | P38398 | 0.99999491 | Novel |
| P38398 | A6NNZ2 | 0.9999949  | Novel |
| P38398 | P04350 | 0.9999949  | Novel |

|        |        |            |       |
|--------|--------|------------|-------|
| P38398 | P07437 | 0.9999949  | Known |
| Q3ZCM7 | P38398 | 0.9999949  | Novel |
| P38398 | P14921 | 0.99999486 | Known |
| P49959 | P35251 | 0.99999486 | Known |
| Q13363 | P38398 | 0.99999485 | Known |
| P38398 | P01106 | 0.99999484 | Known |
| P38398 | P29083 | 0.99999484 | Known |
| Q14676 | P04637 | 0.99999483 | Known |
| Q03468 | O96017 | 0.99999482 | Known |
| Q13315 | P23025 | 0.99999481 | Known |
| Q01094 | P38398 | 0.99999481 | Known |
| P38398 | P14635 | 0.99999476 | Known |
| P38398 | P20248 | 0.99999475 | Known |
| Q05048 | P38398 | 0.99999473 | Known |
| P38398 | P28324 | 0.99999473 | Known |
| P38398 | P19419 | 0.9999947  | Known |
| P22897 | O96017 | 0.99999469 | Known |
| Q5VSK2 | O96017 | 0.99999469 | Novel |
| Q16576 | P38398 | 0.99999466 | Known |
| P84022 | P38398 | 0.99999466 | Known |
| Q09028 | P38398 | 0.99999466 | Known |
| Q9BY41 | Q14676 | 0.9999946  | Known |
| Q9NXR7 | P38398 | 0.99999452 | Known |
| P38398 | P25490 | 0.99999451 | Known |
| Q16254 | P38398 | 0.99999449 | Known |
| P38398 | P24864 | 0.99999445 | Known |
| Q6UWZ7 | P38398 | 0.99999444 | Known |
| P38398 | O14965 | 0.99999435 | Known |
| P38398 | P04637 | 0.9999942  | Known |
| Q93097 | P38398 | 0.99999417 | Known |
| P68400 | P38398 | 0.99999417 | Known |
| Q92878 | O96017 | 0.9999941  | Known |
| Q12824 | P38398 | 0.99999407 | Known |
| Q13535 | P23025 | 0.999994   | Known |
| Q17S11 | P38398 | 0.99999392 | Novel |
| P38398 | O75367 | 0.99999385 | Known |
| P38398 | A6NKZ8 | 0.99999385 | Novel |
| P54132 | O14757 | 0.99999374 | Known |
| Q12873 | Q06609 | 0.99999369 | Known |
| Q9Y620 | Q8TBB1 | 0.99999367 | Known |
| P49959 | P43246 | 0.99999366 | Known |
| P51679 | P38398 | 0.99999364 | Known |
| Q92547 | Q01094 | 0.99999363 | Known |
| Q92878 | Q15554 | 0.99999357 | Known |
| P49959 | P18858 | 0.99999355 | Known |
| P38398 | P23511 | 0.99999339 | Known |
| P38398 | P17535 | 0.99999339 | Known |



|        |        |            |       |
|--------|--------|------------|-------|
| P38398 | P17275 | 0.99999339 | Known |
| Q9HAW4 | O14757 | 0.99999337 | Known |
| Q15853 | P38398 | 0.99999337 | Known |
| P50613 | P38398 | 0.99999337 | Known |
| P38398 | P16220 | 0.99999326 | Known |
| Q06609 | P38398 | 0.99999322 | Known |
| Q92878 | P41235 | 0.9999932  | Known |
| Q9NYK5 | P38398 | 0.9999932  | Known |
| P38398 | P05412 | 0.99999305 | Known |
| Q5VTD9 | P38398 | 0.99999303 | Known |
| P62136 | P38398 | 0.99999303 | Known |
| Q8WXE1 | O60934 | 0.99999295 | Known |
| Q14191 | P43351 | 0.99999291 | Known |
| Q99638 | Q92547 | 0.99999285 | Known |
| P46736 | P38398 | 0.9999927  | Known |
| Q9UNS1 | O14757 | 0.99999264 | Known |
| P51948 | P38398 | 0.99999252 | Known |
| Q13287 | P38398 | 0.99999247 | Known |
| P13010 | O60934 | 0.99999237 | Known |
| P38398 | P11802 | 0.99999236 | Known |
| Q9Y620 | Q92630 | 0.99999229 | Known |
| P38398 | P24941 | 0.99999223 | Known |
| P38398 | P06493 | 0.9999922  | Known |
| Q9Y620 | Q9UJX2 | 0.99999215 | Known |
| P38398 | P24385 | 0.99999214 | Known |
| P49959 | P40692 | 0.99999212 | Known |
| P38398 | P06748 | 0.99999211 | Known |
| P49959 | O60934 | 0.9999921  | Known |
| Q15072 | P38398 | 0.99999205 | Novel |
| Q00535 | P38398 | 0.99999205 | Known |
| Q15382 | Q13315 | 0.99999202 | Known |
| Q96SD1 | O60934 | 0.99999191 | Known |
| Q9NYB0 | Q92878 | 0.99999186 | Known |
| P43246 | O96017 | 0.99999166 | Known |
| Q14192 | P38398 | 0.99999166 | Known |
| P42574 | P38398 | 0.99999159 | Known |
| Q13315 | O43324 | 0.9999915  | Known |
| P38398 | P18846 | 0.99999139 | Known |
| Q9BXW9 | Q06609 | 0.99999139 | Known |
| P33993 | O75943 | 0.99999137 | Known |
| Q96SD1 | P49959 | 0.99999137 | Known |
| Q06609 | P54132 | 0.99999106 | Known |
| P43351 | P00519 | 0.99999098 | Known |
| P38398 | B1ALG2 | 0.99999077 | Novel |
| Q15382 | Q13535 | 0.99999076 | Known |
| P54132 | O75771 | 0.99999074 | Known |
| P43246 | O14757 | 0.99999043 | Known |

|        |        |            |       |
|--------|--------|------------|-------|
| P55072 | O96017 | 0.9999903  | Known |
| Q13535 | O43324 | 0.99999017 | Known |
| P49959 | P12956 | 0.99999016 | Known |
| P38398 | B1ALG1 | 0.99999    | Novel |
| Q06609 | P35568 | 0.99998978 | Known |
| Q9Y620 | Q9H8Y8 | 0.99998963 | Known |
| O96017 | O60934 | 0.99998961 | Known |
| Q13315 | Q03393 | 0.99998955 | Known |
| Q13315 | P16104 | 0.99998938 | Known |
| P46100 | P21246 | 0.99998914 | Known |
| P54132 | O43543 | 0.99998904 | Known |
| P67870 | P38398 | 0.99998893 | Known |
| P15336 | O60934 | 0.9999888  | Known |
| Q06609 | P00519 | 0.99998875 | Known |
| Q9Y620 | P49674 | 0.99998869 | Known |
| Q92889 | P43351 | 0.99998869 | Known |
| P49736 | P43351 | 0.99998867 | Known |
| Q13616 | O14757 | 0.99998844 | Known |
| Q9UKI8 | O14757 | 0.99998828 | Known |
| Q13619 | O14757 | 0.99998817 | Known |
| Q8IUE6 | Q13315 | 0.99998813 | Novel |
| Q6FI13 | Q13315 | 0.99998813 | Novel |
| Q93077 | Q13315 | 0.99998813 | Novel |
| Q13315 | P0C0S8 | 0.99998813 | Novel |
| Q13315 | P20671 | 0.99998813 | Novel |
| Q13315 | P04908 | 0.99998813 | Novel |
| Q7L7L0 | Q13315 | 0.99998813 | Novel |
| P56282 | O75943 | 0.99998811 | Known |
| Q16777 | Q13315 | 0.99998803 | Novel |
| Q9BTM1 | Q13315 | 0.99998803 | Novel |
| Q15554 | P49959 | 0.99998793 | Known |
| Q99878 | Q13315 | 0.99998792 | Novel |
| Q96KK5 | Q13315 | 0.99998792 | Novel |
| Q13535 | Q03393 | 0.99998791 | Known |
| Q9H4B4 | O96017 | 0.99998783 | Known |
| P13010 | O14757 | 0.99998772 | Known |
| P07900 | O14757 | 0.99998772 | Known |
| P08238 | O14757 | 0.99998758 | Novel |
| P68363 | P38398 | 0.99998745 | Novel |
| Q71U36 | P38398 | 0.99998745 | Novel |
| P43351 | P25205 | 0.99998729 | Known |
| P54274 | O60934 | 0.99998704 | Known |
| P53350 | O96017 | 0.99998693 | Known |
| Q14738 | O96017 | 0.99998691 | Known |
| P43351 | P19447 | 0.99998686 | Known |
| Q13541 | Q13315 | 0.9999867  | Known |
| P43351 | P18074 | 0.99998647 | Known |

|        |        |            |       |
|--------|--------|------------|-------|
| Q06609 | O15457 | 0.99998637 | Known |
| Q96NY9 | Q96AY2 | 0.99998635 | Known |
| P38398 | B1ALG0 | 0.99998627 | Novel |
| P24864 | O60934 | 0.99998608 | Known |
| Q9Y620 | O95400 | 0.99998606 | Known |
| Q9Y620 | Q14565 | 0.99998601 | Known |
| Q9Y620 | Q06609 | 0.99998597 | Known |
| P38398 | B1ALF9 | 0.99998573 | Novel |
| Q96NY9 | O96017 | 0.99998565 | Known |
| P12956 | O14757 | 0.99998516 | Known |
| Q6WBX8 | O75943 | 0.99998515 | Known |
| P49959 | P24864 | 0.99998515 | Known |
| P61968 | P38398 | 0.99998514 | Known |
| P52292 | O96017 | 0.99998503 | Known |
| Q13362 | O96017 | 0.99998488 | Known |
| P30304 | O96017 | 0.99998488 | Known |
| Q9NYB0 | P49959 | 0.99998472 | Known |
| P50750 | O60934 | 0.99998458 | Known |
| Q9Y620 | Q9H4K1 | 0.99998452 | Known |
| Q14676 | P16104 | 0.99998442 | Known |
| P30305 | O14757 | 0.9999844  | Known |
| P38398 | B1ANC5 | 0.99998405 | Novel |
| P68036 | P38398 | 0.99998393 | Known |
| O96017 | O15151 | 0.99998379 | Known |
| Q99638 | O75943 | 0.99998376 | Known |
| Q8IV36 | Q06609 | 0.99998375 | Known |
| Q15172 | O96017 | 0.99998365 | Known |
| Q13485 | O14757 | 0.99998358 | Known |
| Q04206 | O14757 | 0.99998355 | Known |
| Q99728 | Q06609 | 0.99998351 | Known |
| P43351 | P27694 | 0.99998321 | Known |
| P30307 | O96017 | 0.99998319 | Known |
| Q06609 | P18074 | 0.99998313 | Known |
| Q9Y2X8 | P38398 | 0.99998305 | Novel |
| P62837 | P38398 | 0.99998305 | Novel |
| P51668 | P38398 | 0.99998305 | Known |
| P61077 | P38398 | 0.99998305 | Known |
| Q16537 | O96017 | 0.99998296 | Known |
| Q92698 | Q06609 | 0.99998283 | Known |
| P30304 | O14757 | 0.99998267 | Known |
| Q13503 | P38398 | 0.99998265 | Known |
| Q8IUE6 | Q14676 | 0.99998259 | Novel |
| Q6FI13 | Q14676 | 0.99998259 | Novel |
| Q93077 | Q14676 | 0.99998259 | Novel |
| Q14676 | P0C0S8 | 0.99998259 | Novel |
| Q14676 | P20671 | 0.99998259 | Novel |
| Q7L7L0 | Q14676 | 0.99998259 | Novel |

|        |        |            |       |
|--------|--------|------------|-------|
| Q14676 | P04908 | 0.99998259 | Novel |
| P38398 | P16104 | 0.99998251 | Known |
| P35249 | O75943 | 0.99998244 | Known |
| Q16777 | Q14676 | 0.99998243 | Novel |
| Q9BTM1 | Q14676 | 0.99998243 | Novel |
| Q99878 | Q14676 | 0.99998227 | Novel |
| Q96KK5 | Q14676 | 0.99998227 | Novel |
| P40938 | O75943 | 0.99998207 | Known |
| Q00005 | O96017 | 0.999982   | Known |
| P35250 | O75943 | 0.99998196 | Known |
| Q01094 | O96017 | 0.99998174 | Known |
| Q9Y620 | P25786 | 0.9999816  | Known |
| O15151 | O14757 | 0.99998142 | Known |
| P40937 | O75943 | 0.99998118 | Known |
| P31749 | O14757 | 0.99998101 | Known |
| P30307 | O14757 | 0.99998072 | Known |
| Q156A1 | P51587 | 0.99998071 | Novel |
| Q7L7L0 | P38398 | 0.99998046 | Novel |
| P38398 | P0C0S8 | 0.99998046 | Novel |
| Q8IUE6 | P38398 | 0.99998046 | Novel |
| P38398 | P20671 | 0.99998046 | Novel |
| Q6FI13 | P38398 | 0.99998046 | Novel |
| Q93077 | P38398 | 0.99998046 | Novel |
| P38398 | P04908 | 0.99998046 | Novel |
| Q16777 | P38398 | 0.99998028 | Known |
| Q9BTM1 | P38398 | 0.99998028 | Novel |
| Q96KK5 | P38398 | 0.9999801  | Novel |
| Q99878 | P38398 | 0.9999801  | Novel |
| P53999 | P38398 | 0.99997991 | Known |
| O43542 | O15287 | 0.99997971 | Known |
| P62899 | P38398 | 0.99997954 | Known |
| Q99638 | O96017 | 0.99997948 | Known |
| Q14565 | P27694 | 0.99997913 | Known |
| Q06609 | P27694 | 0.99997906 | Known |
| Q9BXA7 | O96017 | 0.99997806 | Known |
| Q06609 | P41214 | 0.99997788 | Known |
| O75943 | O60671 | 0.99997703 | Known |
| P60896 | P51587 | 0.99997693 | Known |
| O75943 | O60921 | 0.99997685 | Known |
| P04637 | O14757 | 0.9999766  | Known |
| P68400 | O14757 | 0.99997647 | Known |
| Q92878 | P16104 | 0.99997505 | Known |
| Q156A1 | P46100 | 0.99997348 | Novel |
| Q14568 | O14757 | 0.99997299 | Novel |
| Q96EY1 | Q14565 | 0.99997297 | Known |
| Q96EY1 | Q06609 | 0.99997289 | Known |
| Q92878 | Q6FI13 | 0.99997213 | Novel |

|        |        |            |       |
|--------|--------|------------|-------|
| Q92878 | Q8IUE6 | 0.99997213 | Novel |
| Q93077 | Q92878 | 0.99997213 | Novel |
| Q92878 | Q7L7L0 | 0.99997213 | Novel |
| Q92878 | P0C0S8 | 0.99997213 | Novel |
| Q92878 | P20671 | 0.99997213 | Novel |
| Q92878 | P04908 | 0.99997213 | Novel |
| Q06609 | P08670 | 0.99997204 | Known |
| Q92878 | Q16777 | 0.99997188 | Novel |
| Q9BTM1 | Q92878 | 0.99997188 | Novel |
| Q99878 | Q92878 | 0.99997162 | Novel |
| Q96KK5 | Q92878 | 0.99997162 | Novel |
| Q9Y620 | Q9UK33 | 0.99997066 | Known |
| Q8N782 | P38398 | 0.99996953 | Novel |
| O43502 | O15315 | 0.9999693  | Known |
| Q86WI7 | P38398 | 0.99996901 | Novel |
| Q06609 | P43351 | 0.99996867 | Known |
| Q9NXR7 | Q06609 | 0.99996843 | Known |
| Q156A1 | Q14676 | 0.99996832 | Novel |
| Q99615 | O60671 | 0.99996798 | Known |
| Q9Y620 | O75865 | 0.99996793 | Known |
| Q99615 | O60921 | 0.99996774 | Known |
| Q9Y620 | P63279 | 0.9999677  | Known |
| Q13547 | O60921 | 0.9999669  | Known |
| Q06609 | P04637 | 0.99996658 | Known |
| Q14676 | P62988 | 0.9999661  | Known |
| O60671 | O60260 | 0.9999659  | Known |
| Q06609 | O15315 | 0.99996575 | Known |
| O43542 | O43502 | 0.99996574 | Known |
| Q06609 | O43502 | 0.99996499 | Known |
| O75771 | O15315 | 0.99996453 | Known |
| Q86WI8 | P38398 | 0.99996444 | Novel |
| Q156A1 | P38398 | 0.99996444 | Novel |
| O75771 | O43502 | 0.99996374 | Known |
| Q6WBX8 | O60671 | 0.99996263 | Known |
| Q92547 | Q8N782 | 0.99996262 | Novel |
| Q96B01 | Q06609 | 0.99996246 | Known |
| Q6WBX8 | O60921 | 0.99996234 | Known |
| P31947 | O14757 | 0.99996178 | Known |
| Q06609 | O43542 | 0.99996177 | Known |
| P61981 | O14757 | 0.99996161 | Known |
| Q04917 | O14757 | 0.99996144 | Novel |
| Q9Y376 | Q06609 | 0.99996118 | Known |
| Q14565 | Q06609 | 0.99996106 | Known |
| O75771 | O43542 | 0.99996041 | Known |
| P43351 | P15927 | 0.99996006 | Known |
| Q06609 | O75771 | 0.99995955 | Known |
| Q99638 | O60671 | 0.99995912 | Known |

|        |        |            |       |
|--------|--------|------------|-------|
| Q99638 | O60921 | 0.9999588  | Known |
| Q9Y294 | O96017 | 0.99995874 | Known |
| O43543 | O15315 | 0.99995801 | Known |
| P39748 | O60671 | 0.99995787 | Known |
| Q9P287 | Q06609 | 0.99995763 | Known |
| O43543 | O43502 | 0.99995707 | Known |
| P16104 | O60934 | 0.99995611 | Known |
| Q06609 | P55210 | 0.99995599 | Known |
| P67870 | O14757 | 0.99995534 | Known |
| P38398 | B1ANC4 | 0.99995385 | Novel |
| P49959 | P16104 | 0.99995318 | Known |
| Q9NRF9 | O75943 | 0.99995279 | Known |
| Q06609 | O43543 | 0.99995211 | Known |
| P06746 | O60671 | 0.99995187 | Known |
| Q06609 | P42574 | 0.99995155 | Known |
| Q7L7L0 | O60934 | 0.99995097 | Novel |
| P04908 | O60934 | 0.99995097 | Novel |
| P0C0S8 | O60934 | 0.99995097 | Novel |
| P20671 | O60934 | 0.99995097 | Novel |
| Q8IUE6 | O60934 | 0.99995097 | Novel |
| Q6FI13 | O60934 | 0.99995097 | Novel |
| Q93077 | O60934 | 0.99995097 | Novel |
| Q16777 | O60934 | 0.99995053 | Novel |
| Q9BTM1 | O60934 | 0.99995053 | Novel |
| O75771 | O43543 | 0.9999504  | Known |
| Q99878 | O60934 | 0.99995007 | Novel |
| Q96KK5 | O60934 | 0.99995007 | Novel |
| Q92878 | Q156A1 | 0.99994929 | Novel |
| Q8IUE6 | P49959 | 0.9999477  | Novel |
| P49959 | P0C0S8 | 0.9999477  | Novel |
| Q6FI13 | P49959 | 0.9999477  | Novel |
| Q93077 | P49959 | 0.9999477  | Novel |
| P49959 | P20671 | 0.9999477  | Novel |
| P49959 | P04908 | 0.9999477  | Novel |
| Q7L7L0 | P49959 | 0.9999477  | Novel |
| Q16777 | P49959 | 0.99994722 | Novel |
| Q9BTM1 | P49959 | 0.99994722 | Novel |
| Q99878 | P49959 | 0.99994674 | Novel |
| Q96KK5 | P49959 | 0.99994674 | Novel |
| P55769 | O75943 | 0.99994457 | Known |
| P53803 | P38398 | 0.99994438 | Known |
| O60921 | O60671 | 0.99994173 | Known |
| Q8NHY5 | O60671 | 0.99994128 | Known |
| Q8NHY5 | O60921 | 0.99994083 | Known |
| P38936 | O14757 | 0.99993964 | Known |
| Q9NR33 | O75943 | 0.99993834 | Known |
| P07305 | O15315 | 0.99993738 | Known |

|        |        |            |       |
|--------|--------|------------|-------|
| P12004 | O60921 | 0.99993667 | Known |
| P25787 | O60921 | 0.99992872 | Known |
| P63279 | P43351 | 0.99992788 | Known |
| Q9Y620 | Q156A1 | 0.9999264  | Novel |
| P00492 | O60921 | 0.99992299 | Known |
| Q156A1 | O60934 | 0.99991078 | Novel |
| Q06609 | P63279 | 0.99991007 | Known |
| Q156A1 | P49959 | 0.99990483 | Novel |
| Q06609 | P16104 | 0.99989919 | Known |
| Q19AV6 | O75771 | 0.99989302 | Known |
| Q7L7L0 | Q06609 | 0.99988739 | Novel |
| Q06609 | P0C0S8 | 0.99988739 | Novel |
| Q06609 | P20671 | 0.99988739 | Novel |
| Q8IUE6 | Q06609 | 0.99988739 | Novel |
| Q06609 | P04908 | 0.99988739 | Novel |
| Q6FI13 | Q06609 | 0.99988739 | Novel |
| Q93077 | Q06609 | 0.99988739 | Novel |
| Q16777 | Q06609 | 0.99988636 | Novel |
| Q9BTM1 | Q06609 | 0.99988636 | Novel |
| Q99878 | Q06609 | 0.99988532 | Novel |
| Q96KK5 | Q06609 | 0.99988532 | Novel |
| P63165 | P43351 | 0.99987774 | Known |
| Q156A1 | O96017 | 0.99987486 | Novel |
| P81605 | O75771 | 0.99985775 | Known |
| Q9GZQ8 | O60671 | 0.99985652 | Known |
| O60671 | A6NCE7 | 0.99985652 | Novel |
| Q9H492 | O60671 | 0.99985089 | Novel |
| Q06609 | P63165 | 0.99984756 | Known |
| Q9Y5L4 | Q06609 | 0.99983553 | Known |
| Q156A1 | Q06609 | 0.99979508 | Novel |
| Q5JVF3 | P60896 | 0.9997936  | Known |
| P60842 | P46100 | 0.99749648 | Novel |
| Q13643 | P38398 | 0.99621637 | Novel |
| Q86YH7 | P46100 | 0.9958231  | Novel |
| Q9H4B7 | P38398 | 0.99548084 | Novel |
| Q6PEY2 | P38398 | 0.99536215 | Novel |
| Q9H9S4 | Q06609 | 0.99361242 | Novel |
| Q96QV6 | Q13315 | 0.99105967 | Novel |
| Q96QV6 | Q14676 | 0.99105418 | Novel |
| Q96QV6 | P38398 | 0.99105206 | Novel |
| Q96QV6 | Q92878 | 0.99104381 | Novel |
| Q96QV6 | O60934 | 0.99102284 | Novel |
| Q96QV6 | P49959 | 0.99101959 | Novel |
| Q96QV6 | Q06609 | 0.99095982 | Novel |
| Q9Y2T4 | O96017 | 0.9907746  | Novel |
| P51522 | P38398 | 0.99045341 | Novel |
| Q99867 | P38398 | 0.99035099 | Novel |

|        |        |            |       |
|--------|--------|------------|-------|
| P54652 | P38398 | 0.98869743 | Novel |
| Q59FZ6 | P38398 | 0.9886586  | Novel |
| P51692 | P38398 | 0.9883102  | Novel |
| P51692 | P51587 | 0.9883096  | Novel |
| P27348 | O14757 | 0.98785848 | Novel |
| P63104 | O14757 | 0.98783912 | Novel |
| Q66LE6 | Q13535 | 0.98617336 | Novel |
| Q3ZCT1 | P38398 | 0.98482252 | Novel |
| P31946 | O14757 | 0.98463452 | Novel |
| Q59EJ8 | Q13315 | 0.98367991 | Novel |
| Q9HBD4 | P38398 | 0.98253012 | Novel |
| P38398 | P08107 | 0.98251128 | Novel |
| Q5EBM4 | P38398 | 0.98207725 | Novel |
| Q9H0L4 | P38398 | 0.98175894 | Novel |
| Q58FF7 | O14757 | 0.98172602 | Novel |
| Q5TD97 | P38398 | 0.98115459 | Novel |
| P31751 | O14757 | 0.97652202 | Novel |
| Q92547 | Q15072 | 0.97557754 | Novel |
| Q8N3J9 | P38398 | 0.97533883 | Novel |
| P19784 | O14757 | 0.97497802 | Novel |
| Q9NY65 | P38398 | 0.97450941 | Novel |
| P38398 | P31751 | 0.97424195 | Novel |
| Q9H963 | P38398 | 0.97331394 | Novel |
| P38398 | P19784 | 0.97292599 | Novel |
| Q96CX3 | P38398 | 0.97225881 | Novel |
| P38398 | P34931 | 0.97106284 | Novel |
| Q59G16 | P38398 | 0.97010628 | Novel |
| P38398 | B4DF22 | 0.96899729 | Novel |
| Q96CX3 | Q13315 | 0.96826442 | Novel |
| Q96CX3 | Q13535 | 0.96825246 | Novel |
| P38398 | P17066 | 0.96794698 | Novel |
| Q13535 | Q00005 | 0.96702785 | Novel |
| Q9NRG1 | O60921 | 0.96598222 | Novel |
| Q92547 | Q5EBM4 | 0.9645334  | Novel |
| Q96CX3 | Q92547 | 0.96435964 | Novel |
| P63151 | O96017 | 0.96354873 | Novel |
| Q59GV3 | P38398 | 0.96332825 | Novel |
| P56545 | P38398 | 0.96261572 | Novel |
| Q00526 | P38398 | 0.96153088 | Novel |
| P38398 | P36873 | 0.96061373 | Novel |
| P38398 | A8MYJ9 | 0.95831827 | Novel |
| O96017 | A8MYJ9 | 0.95828032 | Novel |
| Q9Y2T4 | Q13535 | 0.95800801 | Novel |
| Q15072 | Q13315 | 0.95775062 | Novel |
| Q15072 | Q13535 | 0.95761242 | Novel |
| P38398 | O15131 | 0.95750345 | Novel |
| Q92547 | P51522 | 0.95650102 | Novel |



|        |        |            |       |
|--------|--------|------------|-------|
| Q58FF8 | O14757 | 0.95370359 | Novel |
| P38398 | A6NHL2 | 0.95318699 | Novel |
| Q96SK3 | P38398 | 0.94932582 | Novel |
| Q96N58 | P38398 | 0.94875898 | Novel |
| Q15173 | O96017 | 0.94869287 | Novel |
| Q58FF6 | O14757 | 0.94823099 | Novel |
| Q66LE6 | O96017 | 0.94808633 | Novel |
| Q9H836 | P38398 | 0.9466551  | Novel |
| Q13535 | P63010 | 0.94656998 | Novel |
| Q15940 | P38398 | 0.94395617 | Novel |
| P52294 | P38398 | 0.94320694 | Novel |
| Q6ZTB9 | P38398 | 0.94223866 | Novel |
| P48741 | P38398 | 0.93965829 | Novel |
| P51587 | O75369 | 0.93744898 | Novel |
| Q13315 | P51522 | 0.93731589 | Novel |
| Q13535 | P51522 | 0.93731331 | Novel |
| Q15929 | P38398 | 0.9369176  | Novel |
| Q8N8J6 | P38398 | 0.9368922  | Novel |
| P62140 | P38398 | 0.93561076 | Novel |
| Q92769 | P46100 | 0.93301817 | Novel |
| P38398 | P02811 | 0.93253538 | Novel |
| P38398 | P09544 | 0.93253383 | Novel |
| Q14315 | P51587 | 0.9314127  | Novel |
| Q8NB50 | P38398 | 0.93096168 | Novel |
| Q58FG1 | O14757 | 0.93082816 | Novel |
| Q92547 | Q8N3J9 | 0.93012322 | Novel |
| Q96SK3 | Q92547 | 0.92942713 | Novel |
| Q9H963 | Q92547 | 0.9288151  | Novel |
| Q8IWF7 | P38398 | 0.92849396 | Novel |
| Q13315 | O95782 | 0.92601753 | Novel |
| Q13535 | O95782 | 0.92601571 | Novel |
| Q92769 | O60921 | 0.92429478 | Novel |
| Q9BWU1 | P38398 | 0.92401297 | Novel |
| Q92547 | Q3ZCT1 | 0.92311729 | Novel |
| Q9Y243 | O14757 | 0.92260965 | Novel |
| Q9Y243 | P38398 | 0.9218582  | Novel |
| Q15843 | Q14676 | 0.91965093 | Novel |
| P38398 | P17030 | 0.91766481 | Novel |
| Q96N58 | Q92547 | 0.91744449 | Novel |
| P62258 | O14757 | 0.91500389 | Novel |
| P38398 | B1ALF8 | 0.9126898  | Novel |
| P38398 | B3KXL9 | 0.91156349 | Novel |
| P38398 | P17039 | 0.91079228 | Novel |
| Q86YE8 | P38398 | 0.90745999 | Novel |
| P38398 | B1ALF6 | 0.90732753 | Novel |
| Q9UQB9 | P51587 | 0.9069067  | Novel |
| Q6ZR52 | P38398 | 0.90569527 | Novel |

|        |        |            |       |
|--------|--------|------------|-------|
| Q52M93 | P38398 | 0.90145987 | Novel |
| Q9P0M6 | P38398 | 0.90089134 | Novel |
| Q6P3V2 | P38398 | 0.90005568 | Novel |
| Q14585 | P38398 | 0.89980066 | Novel |
| P46100 | P38919 | 0.89940851 | Novel |
| Q9Y620 | P48729 | 0.89938519 | Novel |
| Q9Y620 | Q8N752 | 0.89936401 | Novel |
| Q58FG0 | O14757 | 0.89710673 | Novel |
| Q92878 | Q14541 | 0.89463534 | Novel |
| Q8TF20 | P38398 | 0.89147204 | Novel |
| Q8N972 | P38398 | 0.89091239 | Novel |
| Q06609 | P14136 | 0.89088983 | Novel |
| Q92547 | Q8NB50 | 0.88969912 | Novel |
| Q92547 | Q6ZTB9 | 0.88905918 | Novel |
| P38398 | A8MUV8 | 0.88693772 | Novel |
| Q9Y620 | P48730 | 0.88672641 | Novel |
| Q8N3J9 | Q13535 | 0.88648564 | Novel |
| Q8N3J9 | Q13315 | 0.88643099 | Novel |
| P38398 | O94892 | 0.88637072 | Novel |
| Q6AZW8 | P38398 | 0.88474053 | Novel |
| Q6PF04 | P38398 | 0.88471877 | Novel |
| Q9H963 | Q13535 | 0.88469957 | Novel |
| Q9H963 | Q13315 | 0.88440147 | Novel |
| P38398 | O43830 | 0.88270789 | Novel |
| Q96GM5 | P38398 | 0.88247649 | Novel |
| Q3KP31 | P38398 | 0.88185566 | Novel |
| Q3ZCT1 | Q13535 | 0.88041197 | Novel |
| P38398 | O95674 | 0.88041154 | Novel |
| Q3ZCT1 | Q13315 | 0.88027056 | Novel |
| P38398 | A6NN14 | 0.87922937 | Novel |
| Q92547 | Q14585 | 0.87870599 | Novel |
| P38398 | B4E1R6 | 0.87776058 | Novel |
| Q9Y2P7 | P38398 | 0.87707087 | Novel |
| Q2YD86 | P38398 | 0.8750499  | Novel |
| Q96SK3 | Q13315 | 0.87435736 | Novel |
| Q8TAQ5 | P38398 | 0.87317085 | Novel |
| P38398 | O00763 | 0.87256032 | Novel |
| P61956 | P43351 | 0.87125709 | Novel |
| Q12756 | P38398 | 0.87084805 | Novel |
| P38398 | P17017 | 0.87004749 | Novel |
| Q92547 | P17039 | 0.86924685 | Novel |
| Q92830 | P51587 | 0.86877666 | Novel |
| Q06609 | P61956 | 0.86837993 | Novel |
| Q9UII5 | P38398 | 0.86696701 | Novel |
| Q9NQ29 | P46100 | 0.86507807 | Novel |
| Q96SK3 | Q13535 | 0.86426732 | Novel |
| Q92547 | Q6ZR52 | 0.86424493 | Novel |

|        |        |            |       |
|--------|--------|------------|-------|
| P38398 | O43345 | 0.86331931 | Novel |
| P38398 | A8MXY4 | 0.86075758 | Novel |
| Q8N782 | Q13315 | 0.85916209 | Novel |
| P55854 | P43351 | 0.85857501 | Novel |
| Q8N782 | Q13535 | 0.85839914 | Novel |
| Q6EEV6 | P43351 | 0.85819813 | Novel |
| Q06609 | P55854 | 0.85721726 | Novel |
| Q92547 | Q8TF20 | 0.85706837 | Novel |
| Q9NVP2 | O96017 | 0.85624453 | Novel |
| Q6EEV6 | Q06609 | 0.85497533 | Novel |
| Q5EBM4 | Q13535 | 0.85482625 | Novel |
| Q5EBM4 | Q13315 | 0.85459513 | Novel |
| P46100 | O15379 | 0.85439519 | Novel |
| Q13535 | P17039 | 0.85336393 | Novel |
| Q13315 | P17039 | 0.85316973 | Novel |
| Q00534 | P38398 | 0.85060801 | Novel |
| P38398 | A9QM74 | 0.84920805 | Novel |
| P38398 | O15379 | 0.84757676 | Novel |
| O60921 | O15379 | 0.84726789 | Novel |
| Q8TBZ8 | P38398 | 0.84710205 | Novel |
| Q13535 | O15379 | 0.84702852 | Novel |
| Q14585 | Q13535 | 0.84591573 | Novel |
| Q9NXT0 | P38398 | 0.84408965 | Novel |
| Q6STE5 | P38398 | 0.84384934 | Novel |
| Q14676 | P02811 | 0.84282264 | Novel |
| Q9UQB9 | P38398 | 0.84235732 | Novel |
| Q14585 | Q13315 | 0.84172603 | Novel |
| Q9Y620 | Q86SZ2 | 0.84166202 | Novel |
| Q07002 | P38398 | 0.84151331 | Novel |
| Q13315 | P31350 | 0.84057881 | Novel |
| Q05481 | P38398 | 0.83800889 | Novel |
| O96017 | A9QM74 | 0.83770178 | Novel |
| P38398 | P04281 | 0.83663408 | Novel |
| P38398 | B1ALF7 | 0.83580471 | Novel |
| P38398 | P11021 | 0.83493518 | Novel |
| Q494X3 | P38398 | 0.83370945 | Novel |
| Q9H853 | P38398 | 0.83347013 | Novel |
| Q00537 | P38398 | 0.83335485 | Novel |
| Q96IR2 | P38398 | 0.83303567 | Novel |
| Q9H7R5 | Q92547 | 0.83169128 | Novel |
| Q92547 | Q8N972 | 0.83137476 | Novel |
| Q92547 | Q6AZW8 | 0.83128828 | Novel |
| Q9H7R5 | P38398 | 0.83017722 | Novel |
| Q92547 | Q52M93 | 0.82964915 | Novel |
| Q15973 | P38398 | 0.82931945 | Novel |
| Q5MCW4 | P38398 | 0.82763662 | Novel |
| Q8NCK3 | P38398 | 0.8276272  | Novel |

|        |        |            |       |
|--------|--------|------------|-------|
| Q96N58 | Q13315 | 0.82730619 | Novel |
| Q96N58 | Q13535 | 0.82723149 | Novel |
| P51523 | P38398 | 0.82642197 | Novel |
| Q5SXM1 | P38398 | 0.82639455 | Novel |
| Q06609 | B1AK51 | 0.824054   | Novel |
| Q92547 | A6NN14 | 0.82278251 | Novel |
| Q9Y6R6 | P38398 | 0.82264813 | Novel |
| Q13535 | B1AK51 | 0.82251992 | Novel |
| Q92547 | Q6P3V2 | 0.82167665 | Novel |
| Q92547 | Q3KP31 | 0.82070688 | Novel |
| Q13535 | A6NMM4 | 0.82020785 | Novel |
| Q92547 | Q15940 | 0.82009927 | Novel |
| Q6ZN57 | P38398 | 0.81929162 | Novel |
| Q6ZSZ4 | Q13535 | 0.818558   | Novel |
| Q96JF6 | P38398 | 0.8178466  | Novel |
| Q13620 | O14757 | 0.81747899 | Novel |
| P38398 | P17031 | 0.81725356 | Novel |
| Q9BS31 | P38398 | 0.81694161 | Novel |
| Q9C0F3 | P38398 | 0.81668839 | Novel |
| Q08AN1 | P38398 | 0.81647295 | Novel |
| Q92547 | Q8TAQ5 | 0.81645677 | Novel |
| Q9BTC8 | Q13535 | 0.8159205  | Novel |
| Q9NQX6 | P38398 | 0.8154057  | Novel |
| Q9P2J8 | P38398 | 0.81414799 | Novel |
| Q6K0P9 | P38398 | 0.81406929 | Novel |
| P51786 | P38398 | 0.81360603 | Novel |
| Q9H4D0 | Q92547 | 0.81360285 | Novel |
| Q8IYB9 | P38398 | 0.8131671  | Novel |
| P38398 | O75290 | 0.81266522 | Novel |
| Q9H7R5 | Q13315 | 0.81265736 | Novel |
| Q9H7R5 | Q13535 | 0.81255283 | Novel |
| Q92547 | O43345 | 0.81172208 | Novel |
| Q8N7K0 | P38398 | 0.81157088 | Novel |
| Q92698 | Q14565 | 0.81100014 | Novel |
| Q8NB50 | Q13315 | 0.81056647 | Novel |
| Q8NB50 | Q13535 | 0.81053968 | Novel |
| Q6ZN19 | P38398 | 0.81012031 | Novel |
| P38398 | P35789 | 0.80939847 | Novel |
| Q8N883 | P38398 | 0.80914704 | Novel |
| Q7Z3V5 | P38398 | 0.80879536 | Novel |
| Q9UII5 | Q92547 | 0.80877686 | Novel |
| Q9NSJ1 | P38398 | 0.80869562 | Novel |
| P38398 | P17038 | 0.80866993 | Novel |
| Q14588 | P38398 | 0.80532966 | Novel |
| Q92547 | A8MXY4 | 0.80481253 | Novel |
| P52743 | P38398 | 0.80434532 | Novel |
| Q9Y2P7 | Q92547 | 0.80363522 | Novel |

|        |        |            |       |
|--------|--------|------------|-------|
| Q92547 | P17017 | 0.8026889  | Novel |
| Q92547 | P11388 | 0.80234989 | Novel |
| P38398 | A8MQ14 | 0.80198362 | Novel |
| Q6ZNA1 | P38398 | 0.80174494 | Novel |
| Q86UE3 | P38398 | 0.79997849 | Novel |
| Q96PF2 | O96017 | 0.79997298 | Novel |
| Q8N141 | P38398 | 0.79965369 | Novel |
| Q15329 | P38398 | 0.79925139 | Novel |
| Q9P2J8 | Q92547 | 0.79916094 | Novel |
| Q71UI9 | P38398 | 0.79811041 | Novel |
| P38398 | P0C0S5 | 0.79811041 | Novel |
| Q86T29 | P38398 | 0.79778163 | Novel |
| Q8TDI0 | Q13535 | 0.79768535 | Novel |
| Q14591 | P38398 | 0.79723803 | Novel |
| Q99676 | P38398 | 0.79659107 | Novel |
| Q9UK10 | P38398 | 0.79569444 | Novel |
| Q14587 | P38398 | 0.79535738 | Novel |
| Q9NSJ1 | Q92547 | 0.79502283 | Novel |
| P38398 | P17019 | 0.79470381 | Novel |
| Q92547 | Q8TBZ8 | 0.79436508 | Novel |
| Q92547 | Q6ZN57 | 0.79434193 | Novel |
| Q8N4W9 | P38398 | 0.79431395 | Novel |
| P38398 | A6NNF4 | 0.79420607 | Novel |
| Q92547 | Q6ZN19 | 0.79377789 | Novel |
| Q9Y2G7 | P38398 | 0.79245662 | Novel |
| Q92547 | A8MUV8 | 0.79194535 | Novel |
| Q6ZNH5 | P38398 | 0.79148081 | Novel |
| P38398 | O75820 | 0.79137288 | Novel |
| Q9Y2P7 | Q13315 | 0.79090268 | Novel |
| Q9Y2P7 | Q13535 | 0.79081193 | Novel |
| Q9Y3M9 | P38398 | 0.79015015 | Novel |
| Q8WUN3 | P38398 | 0.78902838 | Novel |
| Q6ZNG1 | P38398 | 0.78832737 | Novel |
| Q8TAI7 | Q13315 | 0.78812732 | Novel |
| Q8TAI7 | Q13535 | 0.78801161 | Novel |
| Q6AZW8 | Q13535 | 0.78768864 | Novel |
| Q6AZW8 | Q13315 | 0.78736819 | Novel |
| Q14839 | Q06609 | 0.78593172 | Novel |
| Q92547 | Q05481 | 0.78481603 | Novel |
| Q9Y2A4 | P38398 | 0.78424388 | Novel |
| Q03923 | P38398 | 0.78388806 | Novel |
| Q8NHY5 | O75943 | 0.78355632 | Novel |
| Q92547 | Q6ZNH5 | 0.78353939 | Novel |
| Q02386 | P38398 | 0.78350396 | Novel |
| Q9Y2U5 | P38398 | 0.78345716 | Novel |
| Q92547 | Q5SXM1 | 0.78329376 | Novel |
| Q9NZL3 | P38398 | 0.78304558 | Novel |

|        |        |            |       |
|--------|--------|------------|-------|
| Q13106 | P38398 | 0.78260542 | Novel |
| P38398 | P30279 | 0.7825239  | Novel |
| Q8NDQ6 | P38398 | 0.78237299 | Novel |
| Q92800 | P46100 | 0.78224162 | Novel |
| Q17RH7 | P38398 | 0.78208225 | Novel |
| Q14584 | P38398 | 0.78199464 | Novel |
| P51504 | P38398 | 0.78068261 | Novel |
| Q9HCL3 | P38398 | 0.78056606 | Novel |
| Q96GD4 | P38398 | 0.78025864 | Novel |
| Q92547 | Q86YE8 | 0.77978867 | Novel |
| Q6ZN57 | Q13315 | 0.77970118 | Novel |
| Q6ZN57 | Q13535 | 0.77963629 | Novel |
| P38398 | P17021 | 0.77928332 | Novel |
| P38398 | O00629 | 0.77924527 | Novel |
| Q13535 | A8MUV8 | 0.77842523 | Novel |
| Q13360 | P38398 | 0.77840787 | Novel |
| Q13315 | A8MUV8 | 0.77831525 | Novel |
| Q3KNS6 | P38398 | 0.77806563 | Novel |
| P38398 | A2RRD8 | 0.77778343 | Novel |
| Q8N9K5 | P38398 | 0.77761546 | Novel |
| P38398 | O00505 | 0.77736019 | Novel |
| Q7L3S4 | P38398 | 0.77696028 | Novel |
| Q96GE5 | P38398 | 0.77585711 | Novel |
| P38398 | O95780 | 0.77553562 | Novel |
| Q969T4 | P38398 | 0.77540442 | Novel |
| P38398 | A6NGH9 | 0.7746011  | Novel |
| Q6ZN19 | Q13535 | 0.77441294 | Novel |
| Q6ZN19 | Q13315 | 0.7743963  | Novel |
| Q9P2J8 | Q13535 | 0.77435026 | Novel |
| Q9P2J8 | Q13315 | 0.7742445  | Novel |
| Q06609 | P17661 | 0.77375277 | Novel |
| Q8NDV3 | P38398 | 0.77345623 | Novel |
| Q92547 | Q8N8L2 | 0.77307427 | Novel |
| Q9ULM2 | P38398 | 0.77279252 | Novel |
| Q8NA42 | P38398 | 0.77247093 | Novel |
| P38398 | P16415 | 0.77225538 | Novel |
| Q8NDV3 | Q13315 | 0.77125052 | Novel |
| Q13535 | A6NN14 | 0.77070727 | Novel |
| Q6ZR52 | Q13315 | 0.77062796 | Novel |
| Q6ZR52 | Q13535 | 0.77035376 | Novel |
| Q8TAQ5 | Q13535 | 0.77001637 | Novel |
| Q96NL3 | P38398 | 0.76997644 | Novel |
| Q8TAQ5 | Q13315 | 0.76981552 | Novel |
| Q13315 | A6NN14 | 0.7692854  | Novel |
| Q8NDV3 | Q14676 | 0.76913695 | Novel |
| Q86V71 | P38398 | 0.76907155 | Novel |
| Q8N8L2 | P38398 | 0.76900772 | Novel |

|        |        |            |       |
|--------|--------|------------|-------|
| P38398 | O75373 | 0.76877279 | Novel |
| Q99717 | P38398 | 0.76859138 | Novel |
| Q3ZCX4 | P38398 | 0.76810846 | Novel |
| P52738 | P38398 | 0.76797388 | Novel |
| Q8TDI0 | Q06609 | 0.76795543 | Novel |
| Q6N045 | P38398 | 0.76752532 | Novel |
| Q4V348 | P38398 | 0.76741391 | Novel |
| Q3MIS6 | P38398 | 0.76715857 | Novel |
| P52742 | P38398 | 0.76704721 | Novel |
| P38398 | O43361 | 0.7663747  | Novel |
| Q6ZSZ4 | Q06609 | 0.76604478 | Novel |
| Q06609 | A6NMM4 | 0.7643864  | Novel |
| P38398 | P17035 | 0.76407341 | Novel |
| Q92547 | Q6ZNG1 | 0.76326721 | Novel |
| P52740 | P38398 | 0.763222   | Novel |
| Q92547 | Q14591 | 0.76303054 | Novel |
| Q9H0M5 | P38398 | 0.76281642 | Novel |
| Q8TAP4 | P38398 | 0.76211135 | Novel |
| Q68EA5 | P38398 | 0.76158153 | Novel |
| Q8N8Z8 | P38398 | 0.7615214  | Novel |
| Q8N988 | P38398 | 0.76128224 | Novel |
| Q6U7Q0 | P38398 | 0.76077377 | Novel |
| Q02880 | P38398 | 0.76067456 | Novel |
| Q9BS34 | P38398 | 0.76031102 | Novel |
| Q96NJ6 | P38398 | 0.76026327 | Novel |
| Q92547 | A6NGH9 | 0.76015959 | Novel |
| Q86XN6 | P38398 | 0.75986507 | Novel |
| P38398 | A8MYF4 | 0.75880104 | Novel |
| Q499Z4 | P38398 | 0.75875945 | Novel |
| P38398 | P11308 | 0.7584457  | Novel |
| Q92878 | P02811 | 0.75838766 | Novel |
| P38398 | P17025 | 0.75816423 | Novel |
| P38398 | A8MUP4 | 0.75807824 | Novel |
| Q5T5D7 | P38398 | 0.75768887 | Novel |
| Q8N9F8 | P38398 | 0.75757063 | Novel |
| Q8NEP9 | P38398 | 0.75746307 | Novel |
| Q8N7Q3 | P38398 | 0.75746162 | Novel |
| Q9H7R0 | P38398 | 0.75716763 | Novel |
| Q92547 | Q08AN1 | 0.75608975 | Novel |
| P38398 | P15622 | 0.75560944 | Novel |
| Q92547 | Q8IYB9 | 0.75531185 | Novel |
| Q03936 | P38398 | 0.75444838 | Novel |
| Q5HYK9 | P38398 | 0.75387317 | Novel |
| Q32M78 | P38398 | 0.75354105 | Novel |
| Q9BX82 | P38398 | 0.7535245  | Novel |
| Q6PDB4 | P38398 | 0.75323144 | Novel |
| Q9P255 | P38398 | 0.75294663 | Novel |

|        |        |            |       |
|--------|--------|------------|-------|
| P38398 | P04280 | 0.75260827 | Novel |
| Q6ZNH5 | Q13535 | 0.75241356 | Novel |
| Q6ZNH5 | Q13315 | 0.75238447 | Novel |
| Q92547 | P17038 | 0.75217076 | Novel |
| Q96IR2 | Q92547 | 0.75104121 | Novel |
| Q8TD23 | P38398 | 0.75008693 | Novel |



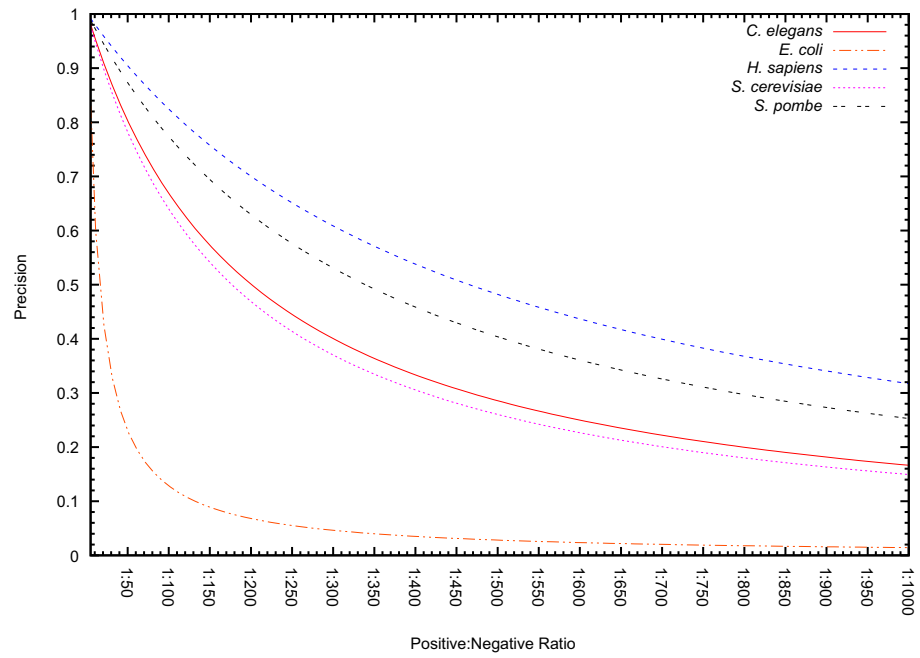

Figure S1. Impact of the positive: negative ratio on the precision. Precision is reduced as positive: negative ratio is reduced.

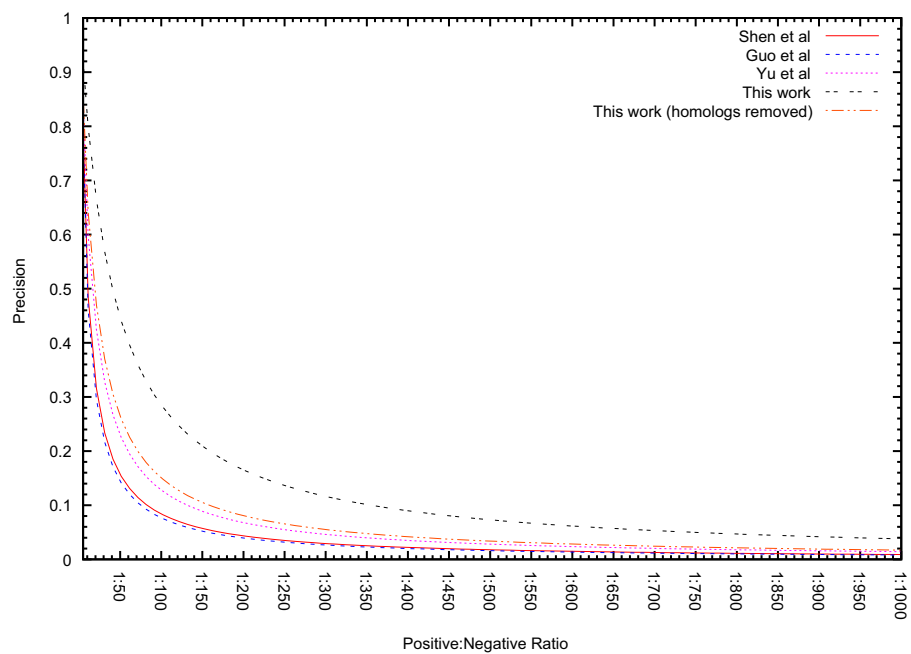

Figure S2. Comparison of precision over human proteins for competing methods. Precision for the current method (before and after the removal of homologs) is higher than those of competing methods for different positive: negative ratios. It should be noted that homologs are not removed in the competing methods.

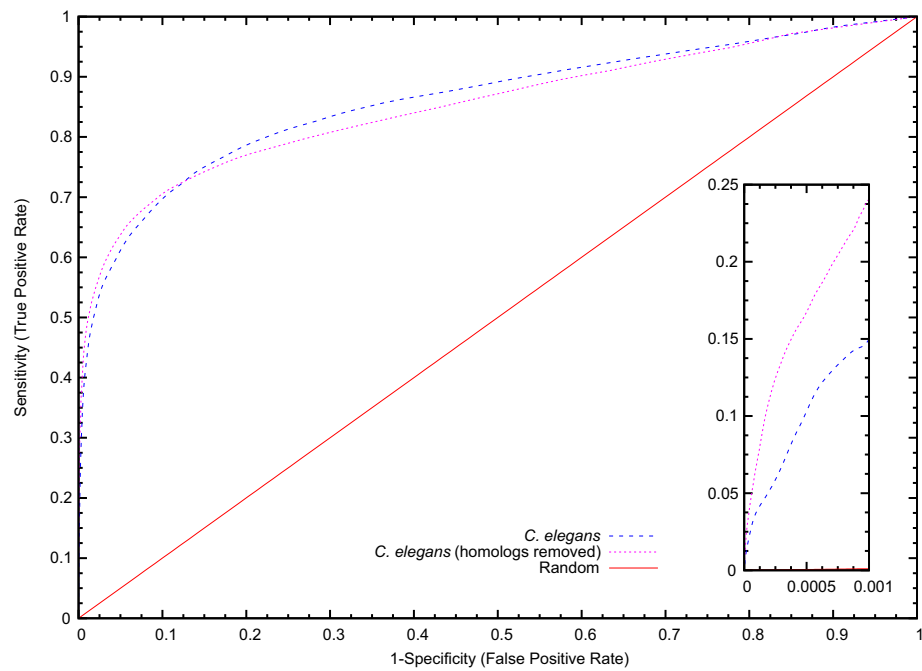

Figure S3. ROC curve with and without homologous sequences for *C. elegans*. The curve presents the True Positive Rate (Sensitivity) against the False Positive Rate (1-Specificity). Inset: performance at very high specificity (99.95%).

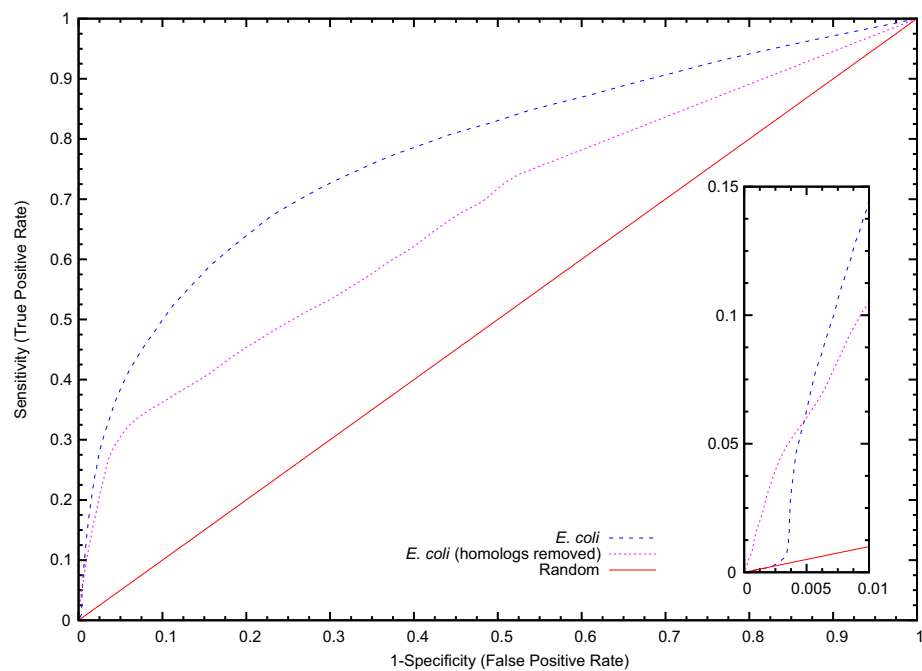

Figure S4. ROC curve with and without homologous sequences for *E. coli*. The curve presents the True Positive Rate (Sensitivity) against the False Positive Rate (1-Specificity). Inset: performance at very high specificity (99.95%).

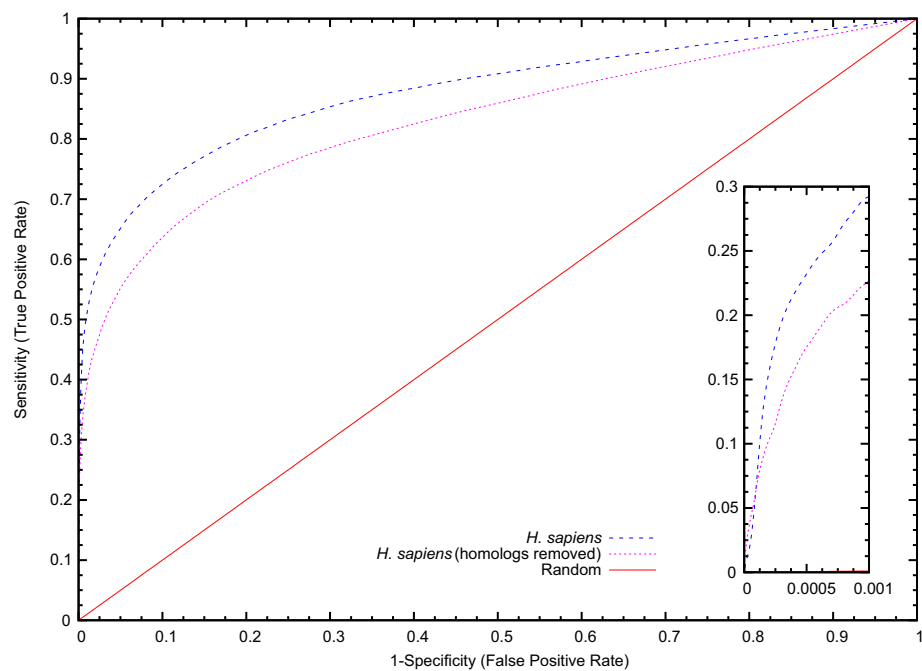

Figure S5. ROC curve with and without homologous sequences for human. The curve presents the True Positive Rate (Sensitivity) against the False Positive Rate (1-Specificity). Inset: performance at very high specificity (99.95%).

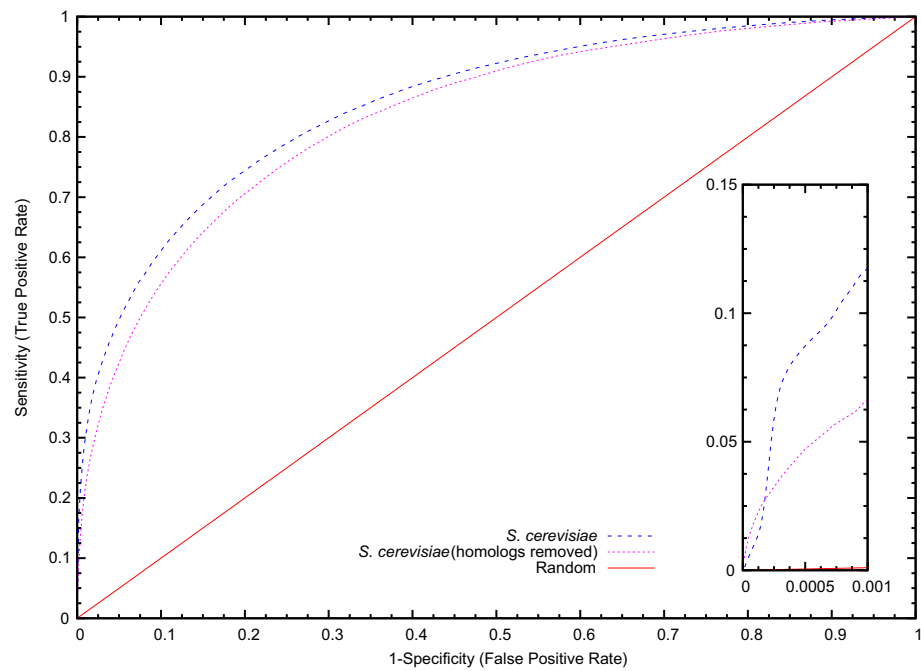

Figure S6. ROC curve with and without homologous sequences for *S. cerevisiae*. The curve presents the True Positive Rate (Sensitivity) against the False Positive Rate (1-Specificity). Inset: performance at very high specificity (99.95%).

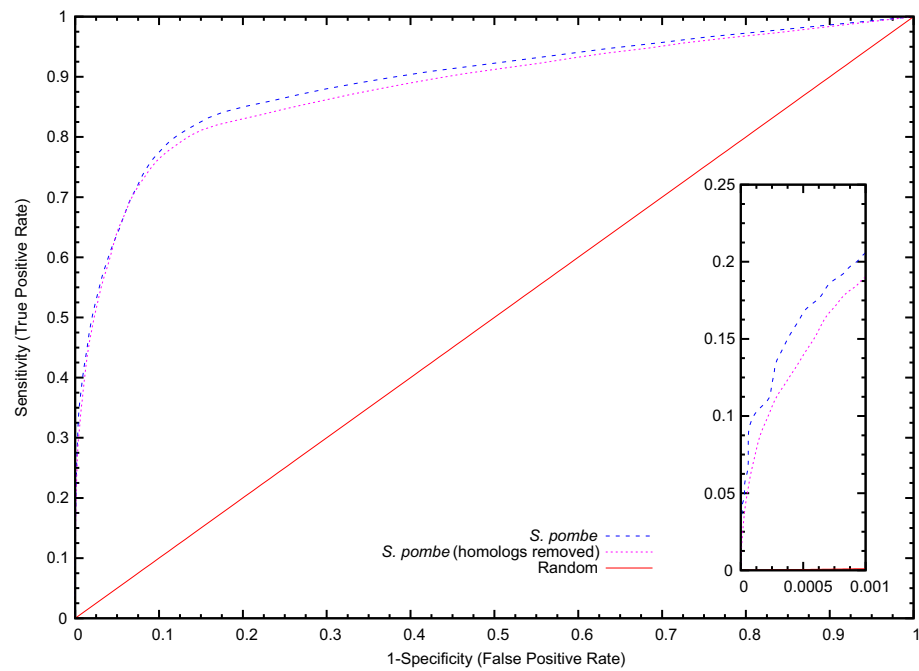

Figure S7. ROC curve with and without homologous sequences for *S. pombe*. The curve presents the True Positive Rate (Sensitivity) against the False Positive Rate (1-Specificity). Inset: performance at very high specificity (99.95%).

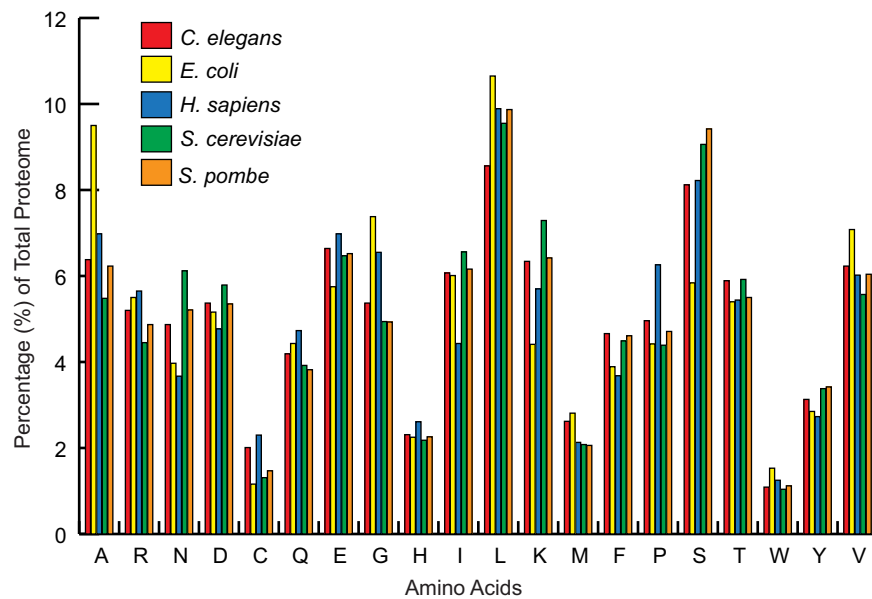

Figure S8. Amino acid distributions within proteins in different organisms. The method presented in this work is tuned for these differences.



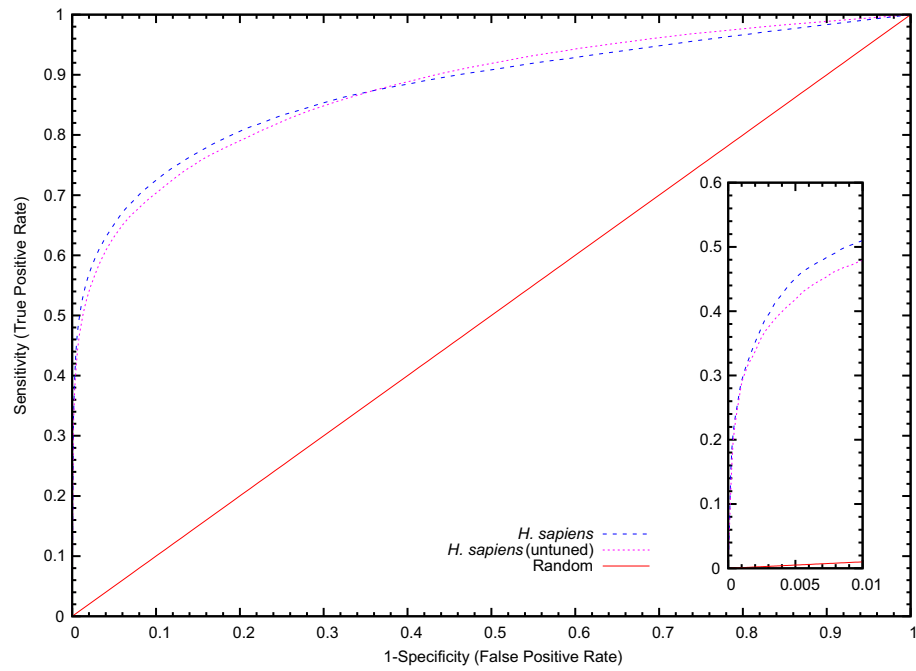

Figure S9. Difference between using tuned and untuned parameters to predict human PPIs. ROC curve presents the True Positive Rate (Sensitivity) against the False Positive Rate (1-Specificity). Inset: performance at very high specificity (99.95%).

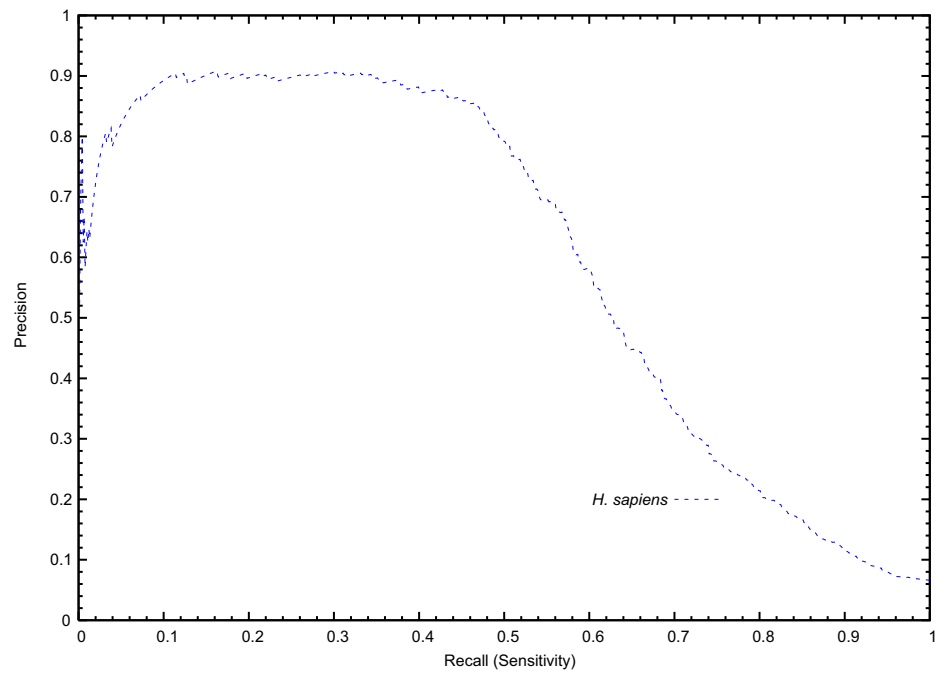

Figure S10: Precision-Recall curve using Yu et al's 1:15 PNR dataset.
